# Supplementary material for: Identifying sex-specific genetic effects across 733 traits in UK Biobank
Source: Research Square preprint supplement (doi:10.21203/rs.3.rs-701876/v1), 2021-07-20
Supplement: Supplementary file 2 [file 1. Heritability and Genetic Correlation Results.xlsx]

## Sheet: Heritability & Gen. Correlation
Main Category	Sub Category	Phenotype Code	Phenotype Description	Type of Variable	Number of Individuals	Number of Controls (If Binary)	Number of Cases (If Binary)	Male Heritability	Female Heritability	Male Std Err	Female Std Err	Heritability Difference Score	BH-Adjusted P-Value	Genetic Correlation	Phenotype Notes
Physical measures		4079_irnt	Diastolic blood pressure, automated reading	continuous_irnt	157515			0.0498	0.0897	0.0029	0.0041	-7.94512	1.42206e-12	0.9106	Blood pressure, automated reading, diastolic. Two measures of blood pressure were taken a few moments apart. Range returned by the Omron device is is 0-255
Physical measures		4080_irnt	Systolic blood pressure, automated reading	continuous_irnt	157514			0.0568	0.0903	0.0028	0.004	-6.86107	2.50495e-09	0.956	Blood pressure, automated reading, systolic. Two measures of blood pressure were taken a few moments apart. Range returned by the Omron device is is 0-255
Health and medical status		1210	Snoring	binary	157592	82393	75199	0.0899	0.1354	0.0065	0.0069	-4.79986	0.000387952	0.8867	ACE touchscreen question "Does your partner or a close relative or friend complain about your snoring?" If the participant activated the Help button they were shown the message: If you are unsure, please provide an estimate or select Do not know.
Early life factors		20022_irnt	Birth weight	continuous_irnt	81064			0.0412	0.0657	0.0032	0.0042	-4.64002	0.000638403	0.9766	Participants were asked to enter their own birth-weight. The weight could be entered either in Kg or in Imperial pounds+ounces. Values entered as Imperial units are held in ~F121~ and ~F122~, and their values have been converted into Kg and incorporated into this field.
Physical measures		23123_irnt	Arm fat percentage (left)	continuous_irnt	163786			0.1049	0.1293	0.0039	0.0042	-4.25718	0.00265711	0.8859	Body composition estimation by impedance measurement. Left arm fat percentage Range 1-75% in 0.1% increments.
Physical measures		23128_irnt	Trunk fat mass	continuous_irnt	163730			0.1066	0.1306	0.0039	0.0041	-4.24132	0.00265711	0.8979	Body composition estimation by impedance measurement. Trunk fat mass Trunk fat mass in Kg, 0.1 increments.
Molecular measures		30510_irnt	Creatinine (enzymatic) in urine	continuous_irnt	162753			0.028	0.0403	0.0018	0.0023	-4.21144	0.00265711	0.9187	Measured by enzymatic analysis on a Beckman Coulter AU5400.
Physical measures		23119_irnt	Arm fat percentage (right)	continuous_irnt	163808			0.1059	0.1281	0.0039	0.0042	-3.87334	0.00983642	0.892	Body composition estimation by impedance measurement. Right arm fat percentage Range 1-75% in 0.1% increments.
Physical measures		23111_irnt	Leg fat percentage (right)	continuous_irnt	163834			0.1071	0.1277	0.0036	0.004	-3.82796	0.0105232	0.8953	Body composition estimation by impedance measurement. Right leg fat percentages Range 1-75% in 0.1% increments.
Health and medical status		6150_4	Vascular/heart problems diagnosed by doctor: High blood pressure	binary	166663	115805	50858	0.2002	0.2615	0.0092	0.0135	-3.75227	0.0119494	0.9602	ACE touchscreen question "Has a doctor ever told you that you have had any of the following conditions? (You can select more than one answer)" The following checks were performed: If code -7 was selected, then no additional choices were allowed. If code -3 was selected, then no additional choices were allowed. If the participant activated the Help button they were shown the message: If you do not…
Physical measures		23100_irnt	Whole body fat mass	continuous_irnt	163303			0.1087	0.1299	0.0039	0.0041	-3.7465	0.0119494	0.9066	Body composition estimation by impedance measurement. Fat mass Total fat mass in Kg, in 0.1Kg increments.
Physical measures		23115_irnt	Leg fat percentage (left)	continuous_irnt	163822			0.1084	0.1272	0.0035	0.004	-3.53711	0.023033	0.8908	Body composition estimation by impedance measurement. Left leg fat percentage Range 1-75% in 0.1% increments.
Physical measures		23124_irnt	Arm fat mass (left)	continuous_irnt	163770			0.1072	0.1282	0.0041	0.0043	-3.53453	0.023033	0.9082	Body composition estimation by impedance measurement. Left arm fat mass. Left arm fat mass in Kg, 0.1 increments.
Physical measures		23112_irnt	Leg fat mass (right)	continuous_irnt	163832			0.1078	0.1276	0.0037	0.0043	-3.49038	0.0252541	0.899	Body composition estimation by impedance measurement. Right leg fat mass Right leg fat mass in Kg, 0.1 increments.
Physical measures		23120_irnt	Arm fat mass (right)	continuous_irnt	163805			0.1083	0.1281	0.0041	0.0043	-3.33256	0.0420504	0.9012	Body composition estimation by impedance measurement. Right arm fat mass. Right arm fat mass in Kg, 0.1 increments.
Health and medical status	Mental	20446	Ever had prolonged feelings of sadness or depression	binary	51839	29000	22839	0.0627	0.1258	0.0143	0.0131	-3.2537	0.0521859	0.9991	Question asked: "Have you ever had a time in your life when you felt sad, blue, or depressed for two weeks or more in a row?"
icd10		Z46	Diagnoses - main ICD10: Z46 Fitting and adjustment of other devices	binary	167020	164220	2800	-0.0261	0.2799	0.0249	0.0934	-3.16567	0.0667154
Health and medical status	Mental	2010	Suffer from 'nerves'	binary	161750	126858	34892	0.0771	0.1129	0.007	0.0091	-3.11824	0.0740891	0.8868	ACE touchscreen question "Do you suffer from 'nerves'?" If the participant activated the Help button they were shown the message: Work through these questions quickly and do not think about the exact meaning of the question
Health and medical status		2335	Chest pain or discomfort	binary	165260	136208	29052	0.0695	0.1003	0.0068	0.0074	-3.06471	0.0785593	0.887	ACE touchscreen question "Do you ever have any pain or discomfort in your chest?"
Health and medical status		6150_100	Vascular/heart problems diagnosed by doctor: None of the above	binary	166663	57515	109148	0.2027	0.2487	0.0087	0.0124	-3.03678	0.0785593	0.9389	ACE touchscreen question "Has a doctor ever told you that you have had any of the following conditions? (You can select more than one answer)" The following checks were performed: If code -7 was selected, then no additional choices were allowed. If code -3 was selected, then no additional choices were allowed. If the participant activated the Help button they were shown the message: If you do not…
Physical measures		5257_irnt	Corneal resistance factor (right)	continuous_irnt	35861			0.1088	0.1509	0.009	0.0106	-3.0276	0.0785593	0.9589	corneal resistance factor for right eye
Physical measures		23116_irnt	Leg fat mass (left)	continuous_irnt	163821			0.1092	0.1267	0.0038	0.0043	-3.0496	0.0785593	0.8973	Body composition estimation by impedance measurement. Left leg fat mass Left leg free mass in Kg, 0.1 increments.
Physical measures		23127_irnt	Trunk fat percentage	continuous_irnt	163740			0.1051	0.1216	0.0038	0.0039	-3.0302	0.0785593	0.8474	Body composition estimation by impedance measurement. Trunk fat percentages Range 1-75% in 0.1% increments.
Physical measures		5084_irnt	Spherical power (right)	continuous_irnt	36406			0.1276	0.1698	0.009	0.0109	-2.98541	0.0864938	0.9696	This is the spherical power of refractometry results for the right eye (0.00 indicates none)
Molecular measures		30520_irnt	Potassium in urine	continuous_irnt	162391			0.0187	0.0258	0.0016	0.0018	-2.94811	0.0937415	0.8828	Measured by ISE (ion selective electrode) analysis on a Beckman Coulter AU5400.
Physical measures		23099_irnt	Body fat percentage	continuous_irnt	163637			0.1099	0.1258	0.0038	0.004	-2.88187	0.11145	0.8831	Body composition estimation by impedance measurement. Body fat percentage Body fat percentage. Range 1% - 75% in 0.1% increments.
Life style	Diet	1558	Alcohol intake frequency.	ordinal	166793			0.0782	0.098	0.0049	0.0049	-2.85729	0.114744	0.8298	ACE touchscreen question "About how often do you drink alcohol?" If the participant activated the Help button they were shown the message: If this varies a lot, please provide an average considering your intake over the last year
Health and medical status	Mental	20479	Ever thought that life not worth living	ordinal	51702			0.0559	0.0922	0.0094	0.0086	-2.84918	0.114744	0.9467	Question asked: "Many people have thoughts that life is not worth living. Have you felt that way?"
Molecular measures		30530_irnt	Sodium in urine	continuous_irnt	162583			0.0319	0.0404	0.0021	0.0022	-2.79478	0.131269	0.9713	Measured by ISE (ion selective electrode) analysis using Beckman Coulter AU5400.
Physical measures		23118_irnt	Leg predicted mass (left)	continuous_irnt	163811			0.1281	0.148	0.005	0.0052	-2.75857	0.141846	0.9473	Body composition estimation by impedance measurement. Left leg predicted mass. in Kg, 0.1 increments.
Physical measures		23117_irnt	Leg fat-free mass (left)	continuous_irnt	163813			0.1281	0.1479	0.005	0.0052	-2.74471	0.143205	0.9486	Body composition estimation by impedance measurement. Left leg fat free mass. Left leg fat free mass in Kg, 0.1 increments.
Physical measures		5256_irnt	Corneal hysteresis (right)	continuous_irnt	35861			0.0856	0.1194	0.0081	0.0095	-2.70738	0.155342	0.9431	corneal hysteresis for right eye (a measure of viscuous damping in the cornea)
Physical measures		20150_irnt	Forced expiratory volume in 1-second (FEV1), Best measure	continuous_irnt	127486			0.1028	0.1206	0.0045	0.0049	-2.67556	0.16084	0.9479	Highest measure from the array of values for Forced Expiratory Volume in 1-second (FEV1) ~F3063~, which was "acceptable" according to corresponding acceptability field (~F3061~). A blow was deemed acceptable if recorded as 0 (no problems) or 32 (0x20 - "USER_ACCEPTED"). This derived data field has come from Professor Martin Tobin at the University of Leicester.
Molecular measures		30120_irnt	Lymphocyte count	continuous_irnt	162098			0.078	0.0997	0.0053	0.0061	-2.68536	0.16084	0.9732	Result of "Lymphocytes Number" assay, performed on blood sample, obtained from UK Biobank assessment centre visit. Lymphocyte count is the proportion of ( lymphoctyes / 100 ) x white blood cell count
icd10		I83	Diagnoses - main ICD10: I83 Varicose veins of lower extremities	binary	167020	164153	2867	0.2156	0.1258	0.0302	0.0159	2.63112	0.17823	0.9584
icd10		K50	Diagnoses - main ICD10: K50 Crohn's disease [regional enteritis]	binary	167020	166581	439	-0.0297	0.2936	0.0896	0.0858	-2.60609	0.183881
icd10		D64	Diagnoses - main ICD10: D64 Other anaemias	binary	167020	165478	1542	0.1214	-0.015	0.0453	0.0264	2.6015	0.183881
Health and medical status	Mental	2040	Risk taking	binary	161729	106454	55275	0.1039	0.1332	0.0072	0.009	-2.54216	0.202269	0.8685	ACE touchscreen question "Would you describe yourself as someone who takes risks?" If the participant activated the Help button they were shown the message: Work through these questions quickly and do not think about the exact meaning of the question
Physical measures		49_irnt	Hip circumference	continuous_irnt	166707			0.104	0.1191	0.0041	0.0043	-2.5415	0.202269	0.8887	Hip circumference
icd10		H61	Diagnoses - main ICD10: H61 Other disorders of external ear	binary	167020	166708	312	0.3437	-0.1691	0.1444	0.1408	2.54261	0.202269
Cognitive functions		20016_irnt	Fluid intelligence score	continuous_irnt	54321			0.0999	0.1233	0.0063	0.0069	-2.50443	0.219273	1.0041	This is a simple unweighted sum of the number of correct answers given to the 13 fluid intelligence questions. Participants who did not answer all of the questions within the allotted 2 minute limit are scored as zero for each of the unattempted questions.
Physical measures		5159_irnt	3mm asymmetry index (right)	continuous_irnt	34293			0.0024	0.0234	0.0053	0.0068	-2.43578	0.241257		This is the asymmetry index as part of the keratometry result taken at 3mm for the right eye
Physical measures		23113_irnt	Leg fat-free mass (right)	continuous_irnt	163826			0.1291	0.147	0.0051	0.0052	-2.4576	0.241257	0.9441	Body composition estimation by impedance measurement. Right leg fat free mass. Right leg fat free mass in Kg, 0.1 increments.
Physical measures		23114_irnt	Leg predicted mass (right)	continuous_irnt	163826			0.1293	0.1471	0.0051	0.0052	-2.44387	0.241257	0.9438	Body composition estimation by impedance measurement. Right leg predicted mass. in Kg, 0.1 increments.
icd10		K92	Diagnoses - main ICD10: K92 Other diseases of digestive system	binary	167020	164333	2687	0.0208	-0.0692	0.026	0.0259	2.45239	0.241257
icd10		M15	Diagnoses - main ICD10: M15 Polyarthrosis	binary	167020	166526	494	-0.1256	0.1565	0.1018	0.0559	-2.42901	0.241257
Physical measures		23108_irnt	Impedance of leg (left)	continuous_irnt	163834			0.1144	0.1299	0.0046	0.0046	-2.38264	0.268073	0.9256	Body composition estimation by impedance measurement. Impedance of left leg, ohm Measured impedance of left leg. Range 150 - 1200 (ohms) in 1 (ohms) increments.
Physical measures		23104_irnt	Body mass index (BMI)	continuous_irnt	163841			0.119	0.1339	0.0044	0.0046	-2.34073	0.282659	0.9136	Body composition estimation by impedance measurement. Body Mass Index. Increments of 0.1 .
Molecular measures		30180_irnt	Lymphocyte percentage	continuous_irnt	162101			0.0635	0.081	0.0046	0.0059	-2.33916	0.282659	0.9682	Result of "Lymphocytes Percentage" assay, performed on blood sample, obtained from UK Biobank assessment centre visit. Lymphocytes (Percentage) is calculated as the proportion of lymphocytes in the leukocytes.
icd10		K91	Diagnoses - main ICD10: K91 Postprocedural disorders of digestive system, not elsewhere classified	binary	167020	166677	343	-0.1509	0.3019	0.1307	0.1422	-2.3444	0.282659
icd10		Z42	Diagnoses - main ICD10: Z42 Follow-up care involving plastic surgery	binary	167020	166819	201	-0.3517	0.0835	0.1849	0.0249	-2.33265	0.282659
icd10		S22	Diagnoses - main ICD10: S22 Fracture of rib(s), sternum and thoracic spine	binary	167020	166395	625	0.2301	-0.1717	0.0934	0.1467	2.3104	0.283124
Physical measures		5158_irnt	6mm asymmetry index (right)	continuous_irnt	16827			0.0328	0.0729	0.0114	0.013	-2.3192	0.283124	1.0618	This is the asymmetry index as part of the keratometry result taken at 6mm for the right eye
Physical measures		50_irnt	Standing height	continuous_irnt	166603			0.2045	0.2365	0.0092	0.0106	-2.27991	0.283124	0.9685	Standing height was measured using a Seca 202 device
Physical measures		5264_irnt	Corneal hysteresis (left)	continuous_irnt	35819			0.0839	0.1116	0.0072	0.0098	-2.27785	0.283124	0.8966	corneal hysteresis for left eye (a measure of viscuous damping in the cornea)
Psychosocial factors		20127_irnt	Neuroticism score	continuous_irnt	137880			0.0524	0.0641	0.0038	0.0034	-2.29456	0.283124	0.9245	This is an externally derived summary score of neuroticism, based on 12 neurotic behaviour domains as reported from fields 1920, 1930, 1940, 1950, 1960, 1970, 1980, 1990, 2000, 2010, 2020 and 2030 from the touchscreen questionnaire at baseline. Participants were assessed for twelve domains of neurotic behaviours via the touchscreen questionnaire. Questions included: Does your mood often go up and…
Physical measures		21001_irnt	Body mass index (BMI)	continuous_irnt	166413			0.1191	0.1335	0.0043	0.0046	-2.28687	0.283124	0.9142	BMI value here is constructed from height and weight measured during the initial Assessment Centre visit. Value is not present if either of these readings were omitted.
Molecular measures		30010_irnt	Red blood cell (erythrocyte) count	continuous_irnt	162399			0.0919	0.1158	0.0066	0.0082	-2.27053	0.283124	0.9288	Result of "Red Blood Cell Count" assay, performed on blood sample, obtained from UK Biobank assessment centre visit. Red blood cells is the number of erythrocytes. Analyser operating range was 0 to 2x10^13 cells/Litre. Typical reference range is 3.9x10^12 to 5.5x10^12 cells/Litre.
icd10		I48	Diagnoses - main ICD10: I48 Atrial fibrillation and flutter	binary	167020	162645	4375	0.1689	0.3028	0.0322	0.049	-2.28369	0.283124	0.8108
Diagnosed disease		22130	Doctor diagnosed COPD (chronic obstructive pulmonary disease)	binary	41234	40420	814	0.0331	0.4136	0.0864	0.1433	-2.27393	0.283124	0.1114	User asked "Has a doctor ever told you that you have had any of the conditions below?" "COPD (Chronic Obstructive Pulmonary Disease)" was one of the options listed.
Physical measures		5306	6mm index of best keratometry results (left)	ordinal	29265			0.0366	-0.0054	0.0146	0.0116	2.25234	0.292006		zero-based index of most representative of keratometry results at 6mm for left eye
Physical measures		5119_irnt	3mm cylindrical power (left)	continuous_irnt	35098			0.0268	0.0492	0.0067	0.0074	-2.24393	0.293636	1.0353	This is the cylindrical power of keratometry results taken at 3mm for the left eye (0 indicates none)
icd10		R35	Diagnoses - main ICD10: R35 Polyuria	binary	167020	165904	1116	0.0154	0.2893	0.0498	0.1127	-2.22299	0.305028	0.9294
Health and medical status	Mental	20459	General happiness with own health	ordinal	51849			0.0675	0.0969	0.0102	0.0086	-2.20362	0.315543	0.823	Question asked: "In general how happy are you with your HEALTH?"
Health and medical status		2080	Frequency of tiredness / lethargy in last 2 weeks	ordinal	162404			0.0549	0.067	0.0037	0.0041	-2.19097	0.320877	0.9087	ACE touchscreen question "Over the past two weeks, how often have you felt tired or had little energy?" If the participant activated the Help button they were shown the message: Answer this question thinking about the past 2 weeks. If you are unsure, please provide an estimate or select Do not know.
Physical measures		102_irnt	Pulse rate, automated reading	continuous_irnt	157515			0.0718	0.0864	0.0045	0.0052	-2.12309	0.351737	0.8943	This is the pulse rate measured during the automated blood pressure readings.
Physical measures		4123_irnt	Heel quantitative ultrasound index (QUI), direct entry (right)	continuous_irnt	53061			0.1293	0.1769	0.0133	0.0179	-2.13451	0.351737	0.9335	The QUI or 'stiffness' is based on measure of the speed of sound and broadband ultrasound attenuation. Direct entry.
Physical measures		4125_irnt	Heel bone mineral density (BMD) T-score, automated (right)	continuous_irnt	53061			0.1293	0.1769	0.0133	0.0179	-2.13451	0.351737	0.9335	This T-score is calculated from the ultrasound heel BMD measurement and is based on a person's bone density compared with what is normally expected in someone of the same sex. The units of the T-score are the number of standard deviations (SD) that the bone density is above or below the standard.
Physical measures		23107_irnt	Impedance of leg (right)	continuous_irnt	163837			0.1144	0.1283	0.0047	0.0046	-2.11359	0.351737	0.923	Body composition estimation by impedance measurement. Impedance of right leg, oh Measured impedance of right leg. Range 150 - 1200 (ohms) in 1 (ohms) increments.
icd10		S61	Diagnoses - main ICD10: S61 Open wound of wrist and hand	binary	167020	165796	1224	-0.0151	0.1997	0.0463	0.0896	-2.12978	0.351737
icd10		D47	Diagnoses - main ICD10: D47 Other neoplasms of uncertain or unknown behaviour of lymphoid, haematopoietic and related tissue	binary	167020	166882	138	-0.4215	0.5062	0.2652	0.3481	-2.11991	0.351737
icd10		C85	Diagnoses - main ICD10: C85 Other and unspecified types of non-Hodgkin's lymphoma	binary	167020	166594	426	0.0762	-0.2822	0.1081	0.1304	2.11595	0.351737
Physical measures		23098_irnt	Weight	continuous_irnt	163845			0.1247	0.1381	0.0045	0.0045	-2.10561	0.353833	0.9288	Weight of person taken during impedance measurement. 0.1 increments. Range 0 - 200Kg.
Molecular measures		30200_irnt	Neutrophill percentage	continuous_irnt	162101			0.0607	0.076	0.0047	0.0056	-2.09275	0.360273	0.9673	Result of "Neutrophils Percentage" assay, performed on blood sample, obtained from UK Biobank assessment centre visit. Neutrophils (Percentage) is calculated as the proportion of neutrophils in the leukocytes.
Life style		1160	Sleep duration	ordinal	166210			0.0668	0.0794	0.0046	0.0042	-2.02281	0.369129	0.931	ACE touchscreen question "About how many hours sleep do you get in every 24 hours? (please include naps)" The following checks were performed: If answer If answer > 23 then rejected If answer If answer > 12 then participant asked to confirm If the participant activated the Help button they were shown the message: If the time you spend sleeping varies a lot, give the average time for a 24 hour day…
Health and medical status		2453	Cancer diagnosed by doctor	binary	166612	156062	10550	0.0112	0.0352	0.0092	0.0071	-2.06521	0.369129	0.6939	ACE touchscreen question "Has a doctor ever told you that you have had cancer?" If the participant activated the Help button they were shown the message: If you are unsure if you have been told you had cancer, select Do not know and you will be asked about this by an interviewer later during this visit.
Health and medical status		6152_7	Blood clot, DVT, bronchitis, emphysema, asthma, rhinitis, eczema, allergy diagnosed by doctor: Blood clot in the lung	binary	166695	165328	1367	0.19	0.0711	0.0466	0.0375	1.9878	0.369129	0.611	ACE touchscreen question "Has a doctor ever told you that you have had any of the following conditions? (You can select more than one answer)" The following checks were performed: If code -7 was selected, then no additional choices were allowed. If code -3 was selected, then no additional choices were allowed. If the participant activated the Help button they were shown the message: If you do not…
Molecular measures		30170	Nucleated red blood cell count	ordinal	162096			-0.0048	0.002	0.0024	0.0024	-2.00347	0.369129		Result of "Nucleated Red Blood Cells Number" assay, performed on blood sample, obtained from UK Biobank assessment centre visit. Nucleated Red Blood Cells count is calculated as: Nucleated Red Blood Cells (percentage) x white blood cell count .
Physical measures		5101_irnt	6mm weak meridian angle (right)	continuous_irnt	29828			0.0082	0.0284	0.0074	0.0069	-1.99648	0.369129		This is the weak meridian angle of keratometry results taken at 6mm for the right eye (blank indicates no cylinder power)
Physical measures		5113_irnt	6mm cylindrical power angle (left)	continuous_irnt	29253			0.012	0.0316	0.0066	0.0073	-1.99162	0.369129	1.0129	This is the cylindrical power angle of keratometry results taken at 6mm for the left eye (blank indicates none)
Physical measures		48_irnt	Waist circumference	continuous_irnt	166736			0.0992	0.1102	0.0038	0.0039	-2.02013	0.369129	0.8798	Waist circumference
Physical measures		78_irnt	Heel bone mineral density (BMD) T-score, automated	continuous_irnt	95426			0.1292	0.1677	0.0117	0.0148	-2.0407	0.369129	0.9053	This T-score is calculated from the ultrasound heel BMD measurement and is based on a person's bone density compared with what is normally expected in someone of the same sex. The units of the T-score are the number of standard deviations (SD) that the bone density is above or below the standard.
Physical measures		3147_irnt	Heel quantitative ultrasound index (QUI), direct entry	continuous_irnt	95426			0.1292	0.1677	0.0117	0.0148	-2.0407	0.369129	0.9054	The QUI or 'stiffness' is based on measure of the speed of sound and broadband ultrasound attenuation. Direct entry.
Physical measures		3148_irnt	Heel bone mineral density (BMD)	continuous_irnt	95344			0.1304	0.1681	0.0117	0.0149	-1.99001	0.369129	0.9046	Estimation of bone mineral density (BMD) in the heel is based on the Quantitative Ultrasound Index through the calcaneus. Direct entry.
Physical measures		4104_irnt	Heel quantitative ultrasound index (QUI), direct entry (left)	continuous_irnt	53073			0.13	0.1739	0.0135	0.0171	-2.01499	0.369129	0.9381	The QUI or 'stiffness' is based on measure of the speed of sound and broadband ultrasound attenuation. Direct entry.
Physical measures		4106_irnt	Heel bone mineral density (BMD) T-score, automated (left)	continuous_irnt	53073			0.13	0.1739	0.0135	0.0171	-2.01499	0.369129	0.938	This T-score is calculated from the ultrasound heel BMD measurement and is based on a person's bone density compared with what is normally expected in someone of the same sex. The units of the T-score are the number of standard deviations (SD) that the bone density is above or below the standard.
Physical measures		4124_irnt	Heel bone mineral density (BMD) (right)	continuous_irnt	53011			0.1312	0.1769	0.0135	0.0179	-2.03835	0.369129	0.9281	Estimation of bone mineral density (BMD) in the left heel is based on the Quantitative Ultrasound Index through the calcaneus. Direct entry.
Physical measures		5255_irnt	Intra-ocular pressure, Goldmann-correlated (right)	continuous_irnt	35861			0.0874	0.1108	0.0081	0.0085	-1.99295	0.369129	1.0561	goldmann-correlated intraocular pressure for right eye
Physical measures		20151_irnt	Forced vital capacity (FVC), Best measure	continuous_irnt	127486			0.1136	0.1286	0.0051	0.0053	-2.03935	0.369129	0.9616	Highest measure from the array of values for Forced Vital Capacity (FVC) (~F3062~), which was "acceptable" according to corresponding acceptability field (~F3061~). A blow was deemed acceptable if recorded as 0 (no problems) or 32 (0x20 - "USER_ACCEPTED"). This derived data field has come from Professor Martin Tobin at the University of Leicester.
Molecular measures		30000_irnt	White blood cell (leukocyte) count	continuous_irnt	162396			0.0789	0.0955	0.0053	0.006	-2.07354	0.369129	0.9592	Result of "White Blood Cell Count" assay, performed on blood sample, obtained from UK Biobank assessment centre visit. White blood count is the number of leukocytes. Analyser operating range was 0 to 9x10^11 cells/Litre. Typical reference range is 3.5x10^9 to 9.6x10^9 cells/Litre.
icd10		Z48	Diagnoses - main ICD10: Z48 Other surgical follow-up care	binary	167020	166655	365	-0.1215	0.1973	0.1141	0.1084	-2.02563	0.369129
icd10		N99	Diagnoses - main ICD10: N99 Postprocedural disorders of genito-urinary system, not elsewhere classified	binary	167020	166914	106	0.616	-0.0596	0.3261	0.0731	2.02159	0.369129
icd10		N30	Diagnoses - main ICD10: N30 Cystitis	binary	167020	166479	541	-0.1113	0.0844	0.0834	0.0511	-2.00082	0.369129
Health and medical status		6150_2	Vascular/heart problems diagnosed by doctor: Angina	binary	166663	158923	7740	0.1714	0.1075	0.0177	0.027	1.97928	0.37262	1.1194	ACE touchscreen question "Has a doctor ever told you that you have had any of the following conditions? (You can select more than one answer)" The following checks were performed: If code -7 was selected, then no additional choices were allowed. If code -3 was selected, then no additional choices were allowed. If the participant activated the Help button they were shown the message: If you do not…
Molecular measures		30080_irnt	Platelet count	continuous_irnt	162399			0.1163	0.1454	0.0088	0.0119	-1.96617	0.380225	0.96	Result of "Platelet Count" assay, performed on blood sample, obtained from UK Biobank assessment centre visit. Platelet count is the number of thrombocytes derived from the platelet histogram.
Physical measures		5103_irnt	3mm weak meridian angle (left)	continuous_irnt	35098			0.0118	0.0297	0.0066	0.0064	-1.94703	0.382392		This is the weak meridian angle of keratometry results taken at 3mm for the left eye (blank indicates no cylinder power)
Physical measures		5114_irnt	6mm cylindrical power angle (right)	continuous_irnt	29822			0.0087	0.0283	0.0074	0.0069	-1.93718	0.382392		This is the cylindrical power angle of keratometry results taken at 6mm for the right eye (blank indicates none)
Physical measures		5157_irnt	6mm asymmetry index (left)	continuous_irnt	16367			0.045	0.0795	0.0118	0.0133	-1.94038	0.382392	0.9829	This is the asymmetry index as part of the keratometry result taken at 6mm for the left eye
Physical measures		6038_irnt	Number of trend entries	continuous_irnt	25165			0.0355	0.013	0.0075	0.0089	1.9332	0.382392	0.6986	Number of trend entries during exercise bike test The Bike Test consists of three phases, a Pre- Test phase, where a resting ECG is recorded for some time. An Activity phase, where the participant cycles for a set period of time with increasing cycling workload, and finally a Recovery phase, where the participant has stopped pedalling and an ECG is recorded. At various points, called trends, duri…
Physical measures		21002_irnt	Weight	continuous_irnt	166489			0.1251	0.1375	0.0045	0.0045	-1.94847	0.382392	0.9288	Weight was measured by a variety of means during the initial Assessment Centre visit. This field amalgamates these values into a single item.
icd10		G93	Diagnoses - main ICD10: G93 Other disorders of brain	binary	167020	166881	139	0.3004	-0.4148	0.2848	0.2352	1.9363	0.382392
icd10		K90	Diagnoses - main ICD10: K90 Intestinal malabsorption	binary	167020	166694	326	-0.0299	0.2599	0.1207	0.0887	-1.93475	0.382392
Physical measures		5112_irnt	3mm cylindrical power angle (left)	continuous_irnt	35094			0.0119	0.0295	0.0066	0.0064	-1.9144	0.385371		This is the cylindrical power angle of keratometry results taken at 3mm for the left eye (blank indicates none)
Physical measures		4105_irnt	Heel bone mineral density (BMD) (left)	continuous_irnt	53014			0.1321	0.1739	0.0136	0.0171	-1.91315	0.385371	0.9365	Estimation of bone mineral density (BMD) in the left heel is based on the Quantitative Ultrasound Index through the calcaneus. Direct entry.
Physical measures		5265_irnt	Corneal resistance factor (left)	continuous_irnt	35819			0.1184	0.1449	0.0087	0.0107	-1.9216	0.385371	0.8595	corneal resistance factor for left eye
Physical measures		23106_irnt	Impedance of whole body	continuous_irnt	163837			0.1244	0.1377	0.0048	0.005	-1.91889	0.385371	0.9097	Body composition estimation by impedance measurement. Impedance of whole body. is Range 150 - 1200ohms in 1ohm increments.
Physical measures		6033_irnt	Maximum heart rate during fitness test	continuous_irnt	25160			0.0342	0.0615	0.0086	0.0116	-1.89055	0.402013	0.6241	This is the maximum heart rate recorded during bike exercise test. The Bike Test consists of three phases: A Pre-Test phase, where a resting ECG is recorded for some time; an Activity phase, where the participant cycles for a set period of time with increasing cycling workload; and finally a Recovery phase, where the participant has stopped pedalling and an ECG is recorded. Heart rate is recorded…
Physical measures		5102_irnt	6mm weak meridian angle (left)	continuous_irnt	29265			0.0132	0.0317	0.0066	0.0073	-1.87984	0.406661	0.9792	This is the weak meridian angle of keratometry results taken at 6mm for the left eye (blank indicates no cylinder power)
Physical measures		5107_irnt	3mm strong meridian angle (right)	continuous_irnt	35174			0.0266	0.0436	0.0062	0.0066	-1.87734	0.406661	0.6695	This is the strong meridian angle of keratometry results taken at 3mm for the right eye (blank indicates no cylinder power)
icd10		K22	Diagnoses - main ICD10: K22 Other diseases of oesophagus	binary	167020	163702	3318	0.1075	0.0249	0.0305	0.0322	1.86238	0.416809
icd10		L98	Diagnoses - main ICD10: L98 Other disorders of skin and subcutaneous tissue, not elsewhere classified	binary	167020	165231	1789	-0.0481	0.0299	0.0321	0.0272	-1.85386	0.419871
icd10		R79	Diagnoses - main ICD10: R79 Other abnormal findings of blood chemistry	binary	167020	164614	2406	0.0894	0.6643	0.0302	0.3091	-1.8511	0.419871	0.097
Physical measures		5117_irnt	6mm cylindrical power (right)	continuous_irnt	29828			0.0075	0.0246	0.0065	0.0066	-1.84598	0.420956		This is the cylindrical power of keratometry results taken at 6mm for the right eye (0 indicates none)
Health and medical status		40001_C259	Underlying (primary) cause of death: ICD10: C25.9 Pancreas, unspecified	binary	5588	5359	229	-0.0953	1.0304	0.3654	0.5066	-1.80219	0.456528		Underlying/primary cause of death reported for participant. Note that this may not match the text value in ~F40010~ due to transcription errors at source. Acquired from central registry.
icd10		F41	Diagnoses - main ICD10: F41 Other anxiety disorders	binary	167020	166843	177	-0.444	0.0406	0.2133	0.1639	-1.8015	0.456528
icd10		L92	Diagnoses - main ICD10: L92 Granulomatous disorders of skin and subcutaneous tissue	binary	167020	166881	139	0.3441	-0.2172	0.2531	0.1834	1.7958	0.458289
Physical measures		4120_irnt	Heel broadband ultrasound attenuation (right)	continuous_irnt	53056			0.1181	0.1554	0.0125	0.0168	-1.78127	0.461316	0.9424	Broadband ultrasound attenuation through right heel
Psychosocial factors		4609_irnt	Longest period of depression	continuous_irnt	21794			0.0011	0.0244	0.0092	0.0093	-1.78112	0.461316	*******************	ACE touchscreen question "How many weeks was the longest period when you were feeling depressed or down?" The following checks were performed: If answer If answer > 999 then rejected ~F4609~ was collected from participants who indicated they have felt depressed or down for at least a whole week, as defined by their answers to ~F4598~
icd10		H72	Diagnoses - main ICD10: H72 Perforation of tympanic membrane	binary	167020	166707	313	0.3021	-0.03	0.1432	0.1191	1.78304	0.461316
icd10		Z09	Diagnoses - main ICD10: Z09 Follow-up examination after treatment for conditions other than malignant neoplasms	binary	167020	162795	4225	0.0581	0.0072	0.0217	0.0187	1.77688	0.46172
Health and medical status	Mental	20495	Avoided activities or situations because of previous stressful experience in past month	ordinal	51884			0.0203	0.041	0.0086	0.0079	-1.7726	0.462183	1.0818	Question asked: "Next is a list of problems and complaints that people sometimes have in response to such extremely stressful experiences. Please indicate how much you have been bothered by that problem in the past month: Avoiding activities or situations because they reminded you of a stressful experience?"
icd10		I84	Diagnoses - main ICD10: I84 Haemorrhoids	binary	167020	160961	6059	0.0806	0.0398	0.0168	0.0159	1.76386	0.467175	1.1378
Physical measures		5085_irnt	Spherical power (left)	continuous_irnt	36295			0.1359	0.1607	0.009	0.0109	-1.75446	0.472886	0.9821	This is the spherical power of refractometry results for the left eye (0.00 indicates none)
Health and medical status	Mental	20509	Recent inability to stop or control worrying	ordinal	51787			0.0338	0.0554	0.0095	0.008	-1.73917	0.484758	0.9131	Question asked: "Over the last 2 weeks, how often have you been bothered by any of the following problems? [anxiety symptoms] Not being able to stop or control worrying"
Physical measures		1747_4	Hair colour (natural, before greying): Dark brown	binary	166357	104183	62174	0.1494	0.2618	0.0354	0.0546	-1.72733	0.485792	0.9944	ACE touchscreen question "What best describes your natural hair colour? (If your hair colour is grey, the colour before you went grey)" If the participant activated the Help button they were shown the message: If you are unsure, please select the colour closest to your natural adult hair colour or select Do not know.
Physical measures		5110_irnt	6mm asymmetry angle (left)	continuous_irnt	16367			0.0251	0.0531	0.0112	0.0118	-1.72107	0.485792	0.792	This is the asymmetric angle of keratometry results taken at 6mm for the left eye (blank indicates no asymmetry)
icd10		L02	Diagnoses - main ICD10: L02 Cutaneous abscess, furuncle and carbuncle	binary	167020	166103	917	-0.0924	0.0569	0.0549	0.0674	-1.71748	0.485792
icd10		K05	Diagnoses - main ICD10: K05 Gingivitis and periodontal diseases	binary	167020	166837	183	-0.0207	0.4072	0.2099	0.1345	-1.71644	0.485792
icd10		I73	Diagnoses - main ICD10: I73 Other peripheral vascular diseases	binary	167020	166553	467	0.1958	-0.2064	0.1086	0.2077	1.71603	0.485792
Health and medical status	Mental	4653	Ever highly irritable/argumentative for 2 days	binary	54648	45528	9120	0.1388	0.0916	0.0221	0.0162	1.72252	0.485792	0.9174	ACE touchscreen question "Have you ever had a period of time lasting at least two days when you were so irritable that you found yourself shouting at people or starting fights or arguments?"
Physical measures		3144_irnt	Heel Broadband ultrasound attenuation, direct entry	continuous_irnt	95416			0.1224	0.1521	0.0108	0.0136	-1.71018	0.488107	0.8927	Broadband ultrasound attenuation through heel
Physical measures		4119_irnt	Ankle spacing width (right)	continuous_irnt	53061			0.1367	0.1569	0.0085	0.0083	-1.7003	0.49463	0.9606	Right ankle width as indicated by the spacing between measurement transducer pads on heel
icd10		M46	Diagnoses - main ICD10: M46 Other inflammatory spondylopathies	binary	167020	166895	125	0.5583	-0.1322	0.3211	0.2517	1.69243	0.499121
icd10		S82	Diagnoses - main ICD10: S82 Fracture of lower leg, including ankle	binary	167020	165232	1788	-0.0184	0.0526	0.0336	0.0256	-1.68082	0.507615
icd10		K20	Diagnoses - main ICD10: K20 Oesophagitis	binary	167020	164478	2542	-0.0004	0.0696	0.0255	0.0331	-1.6753	0.509706
Physical measures		4101_irnt	Heel broadband ultrasound attenuation (left)	continuous_irnt	53069			0.1203	0.1547	0.0128	0.0163	-1.65982	0.509851	0.9518	Broadband ultrasound attenuation through left heel
icd10		K66	Diagnoses - main ICD10: K66 Other disorders of peritoneum	binary	167020	166890	130	-0.308	0.1659	0.2518	0.1303	-1.67151	0.509851
icd10		R05	Diagnoses - main ICD10: R05 Cough	binary	167020	166609	411	0.2228	-0.0114	0.1158	0.0797	1.666	0.509851
icd10		H00	Diagnoses - main ICD10: H00 Hordeolum and chalazion	binary	167020	166246	774	-0.0221	0.1457	0.0681	0.0744	-1.66367	0.509851
icd10		D69	Diagnoses - main ICD10: D69 Purpura and other haemorrhagic conditions	binary	167020	166795	225	-0.1069	0.3388	0.1597	0.2163	-1.65769	0.509851
Physical measures		5106_irnt	6mm strong meridian angle (right)	continuous_irnt	29828			0.0218	0.0382	0.0072	0.0069	-1.64453	0.51021		This is the strong meridian angle of keratometry results taken at 6mm for the right eye (blank indicates no cylinder power)
Physical measures		5163_irnt	3mm regularity index (left)	continuous_irnt	34079			0.0249	0.01	0.0068	0.006	1.64303	0.51021	0.6323	This is the regularity index as part of the keratometry result taken at 3mm for the left eye
icd10		C91	Diagnoses - main ICD10: C91 Lymphoid leukaemia	binary	167020	166784	236	-0.0158	0.6338	0.1612	0.3583	-1.65338	0.51021
icd10		C19	Diagnoses - main ICD10: C19 Malignant neoplasm of rectosigmoid junction	binary	167020	166731	289	0.1625	-0.2462	0.1621	0.1889	1.64191	0.51021
icd10		R63	Diagnoses - main ICD10: R63 Symptoms and signs concerning food and fluid intake	binary	167020	166462	558	0.1443	-0.0277	0.0793	0.0686	1.64037	0.51021
Physical measures		23121_irnt	Arm fat-free mass (right)	continuous_irnt	163798			0.1319	0.1435	0.005	0.0051	-1.62417	0.520283	0.9373	Body composition estimation by impedance measurement. Right arm fat free mass Right arm fat free mass in Kg, 0.1 increments.
Physical measures		23122_irnt	Arm predicted mass (right)	continuous_irnt	163796			0.1318	0.1434	0.005	0.0051	-1.62417	0.520283	0.9392	Body composition estimation by impedance measurement. Right Arm predicted mass in Kg, 0.1 increments.
Physical measures		20015_irnt	Sitting height	continuous_irnt	166466			0.1525	0.1713	0.0081	0.0084	-1.61108	0.527181	0.957	Distance from rump to crown when sitting, calculated as the difference between ~F51~ and ~F3077~.
icd10		I70	Diagnoses - main ICD10: I70 Atherosclerosis	binary	167020	166585	435	0.0175	0.6369	0.1062	0.3695	-1.6111	0.527181	*******************
Physical measures		5116_irnt	3mm cylindrical power (right)	continuous_irnt	35174			0.0443	0.0597	0.0063	0.0073	-1.59708	0.538748	0.802	This is the cylindrical power of keratometry results taken at 3mm for the right eye (0 indicates none)
icd10		C79	Diagnoses - main ICD10: C79 Secondary malignant neoplasm of other sites	binary	167020	166519	501	-0.1598	0.0371	0.0918	0.0833	-1.58841	0.540643
Molecular measures		30140_irnt	Neutrophill count	continuous_irnt	162098			0.0712	0.0856	0.0058	0.007	-1.58404	0.540643	0.9582	Result of "Neutrophils Number" assay, performed on blood sample, obtained from UK Biobank assessment centre visit. Neutrophils count is the proportion of ( neutrophils / 100 ) x white blood cell count.
icd10		M65	Diagnoses - main ICD10: M65 Synovitis and tenosynovitis	binary	167020	165912	1108	0.1649	0.0675	0.0492	0.0369	1.58374	0.540643	0.6419
Diagnosed disease		22133	Doctor diagnosed sarcoidosis	binary	41234	41045	189	-0.02	0.5842	0.2889	0.2497	-1.58228	0.540643		User asked "Has a doctor ever told you that you have had any of the conditions below?" "sarcoidosis" was one of the options listed.
Health and medical status		6149_6	Mouth/teeth dental problems: Dentures	binary	166385	136554	29831	0.1207	0.1394	0.0073	0.0096	-1.55055	0.564107	0.9023	ACE touchscreen question "Do you have any of the following? (You can select more than one answer)" The following checks were performed: If code -7 was selected, then no additional choices were allowed. If code -3 was selected, then no additional choices were allowed. If the participant activated the Help button they were shown the message: Answer this question thinking about the past year.
Physical measures		4100_irnt	Ankle spacing width (left)	continuous_irnt	53073			0.1393	0.1583	0.0088	0.0085	-1.55295	0.564107	0.9588	Left ankle width as indicated by the spacing between measurement transducer pads on heel
icd10		T50	Diagnoses - main ICD10: T50 Poisoning by diuretics and other and unspecified drugs, medicaments and biological substances	binary	167020	166917	103	0.1399	0.859	0.3783	0.2677	-1.55167	0.564107	0.9468
icd10		L85	Diagnoses - main ICD10: L85 Other epidermal thickening	binary	167020	166841	179	0.6475	0.2298	0.2073	0.1727	1.54811	0.564107	-0.5085
Molecular measures		30250_irnt	Reticulocyte count	continuous_irnt	159806			0.0868	0.1017	0.006	0.0076	-1.53878	0.57099	0.9295	Result of "Reticulocytes Number" assay, performed on blood sample, obtained from UK Biobank assessment centre visit. Reticulocytes count is computed from the reticulocyte per cent multiplied by the red blood cell count.
Life style		20453	Ever taken cannabis	ordinal	51869			0.0973	0.0776	0.01	0.0081	1.53082	0.57639	0.8541	Question asked: "Have you taken CANNABIS (marijuana, grass, hash, ganja, blow, draw, skunk, weed, spliff, dope), even if it was a long time ago?"
Health and medical status		6151_5	Fractured bone site(s): Wrist	binary	165950	163796	2154	0.0196	0.0716	0.031	0.0147	-1.51565	0.585912	0.7439	ACE touchscreen question "Which bones did you fracture/break? (You can select more than one answer)" The following checks were performed: If code -1 was selected, then no additional choices were allowed. If code -3 was selected, then no additional choices were allowed. ~F6151~ was collected from participants who indicated they have had fractured/broken bones in the last 5 years, as defined by the…
icd10		M17	Diagnoses - main ICD10: M17 Gonarthrosis [arthrosis of knee]	binary	167020	161351	5669	0.1768	0.136	0.0188	0.0192	1.51833	0.585912	0.8867
icd10		R00	Diagnoses - main ICD10: R00 Abnormalities of heart beat	binary	167020	165861	1159	0.0964	-0.0034	0.0495	0.0436	1.51295	0.585912
Early life factors		1687	Comparative body size at age 10	ordinal	163652			0.1291	0.1469	0.0081	0.0086	-1.50669	0.587938	0.976	ACE touchscreen question "When you were 10 years old, compared to average would you describe yourself as:"
icd10		N39	Diagnoses - main ICD10: N39 Other disorders of urinary system	binary	167020	163824	3196	0.0332	0.0719	0.0229	0.0117	-1.50491	0.587938	0.3461
icd10		D22	Diagnoses - main ICD10: D22 Melanocytic naevi	binary	167020	165886	1134	-0.0371	0.0411	0.048	0.0205	-1.49825	0.589179
Health and medical status	Mental	20460	Belief that own life is meaningful	ordinal	50501			0.055	0.0736	0.0095	0.008	-1.49762	0.589179	0.7813	Question asked: "To what extent do you feel your life to be meaningful?"
Cognitive functions		20019_irnt	Speech-reception-threshold (SRT) estimate (left)	continuous_irnt	53251			0.0177	0.0097	0.0039	0.0037	1.48813	0.596507	0.8704	SRT is the Speech Reception Threshold, defined here as the signal-to-noise ratio at which half of the presented speech can be understood correctly. This was estimated as the value of the last round of the signal-to-noise ratio measurement for participants who completed all 15 rounds of the test (left-ear).
Health and medical status		40001_C189	Underlying (primary) cause of death: ICD10: C18.9 Colon, unspecified	binary	5588	5455	133	-0.7476	0.6291	0.5449	0.7515	-1.4831	0.598756		Underlying/primary cause of death reported for participant. Note that this may not match the text value in ~F40010~ due to transcription errors at source. Acquired from central registry.
Health and medical status		6148_3	Eye problems/disorders: Injury or trauma resulting in loss of vision	binary	54561	53212	1349	-0.0691	0.102	0.0573	0.1023	-1.45922	0.60034		ACE touchscreen question "Has a doctor told you that you have any of the following problems with your eyes? (You can select more than one answer)" The following checks were performed: If code -7 was selected, then no additional choices were allowed. If code -3 was selected, then no additional choices were allowed. If code -1 was selected, then no additional choices were allowed. If the participan…
Physical measures		5097_irnt	6mm weak meridian (left)	continuous_irnt	29265			0.1816	0.2111	0.0138	0.0145	-1.47373	0.60034	0.9164	This is the weak meridian of keratometry results taken at 3mm for the left eye
Physical measures		5098_irnt	6mm weak meridian (right)	continuous_irnt	29828			0.176	0.2034	0.0132	0.0133	-1.46223	0.60034	0.9597	This is the weak meridian of keratometry results taken at 6mm for the right eye
icd10		D11	Diagnoses - main ICD10: D11 Benign neoplasm of major salivary glands	binary	167020	166859	161	0.3515	-0.0895	0.2516	0.1636	1.46945	0.60034
icd10		H25	Diagnoses - main ICD10: H25 Senile cataract	binary	167020	164257	2763	0.1066	0.0499	0.0321	0.0215	1.46758	0.60034	1.1489
icd10		M06	Diagnoses - main ICD10: M06 Other rheumatoid arthritis	binary	167020	166633	387	-0.1006	0.0806	0.1159	0.0433	-1.46455	0.60034
icd10		I64	Diagnoses - main ICD10: I64 Stroke, not specified as haemorrhage or infarction	binary	167020	166523	497	0.004	-0.3018	0.0905	0.1884	1.46309	0.60034
icd10		R50	Diagnoses - main ICD10: R50 Fever of unknown origin	binary	167020	166409	611	-0.08	0.0943	0.0753	0.0929	-1.45754	0.60034
Physical measures		23102_irnt	Whole body water mass	continuous_irnt	163842			0.1426	0.1541	0.0058	0.0054	-1.45117	0.604242	0.939	Body composition estimation by impedance measurement. Body water mass Units in Kg. Increments in 0.1 Kg.
Physical measures		5237	3mm index of best keratometry results (right)	ordinal	35174			0.0116	-0.0131	0.0117	0.0125	1.44264	0.610645		zero-based index of most representative of keratometry results at 3mm for right eye
icd10		I25	Diagnoses - main ICD10: I25 Chronic ischaemic heart disease	binary	167020	157181	9839	0.1813	0.2434	0.0176	0.0394	-1.43909	0.611343	0.8885
Health and medical status		6152_9	Blood clot, DVT, bronchitis, emphysema, asthma, rhinitis, eczema, allergy diagnosed by doctor: Hayfever, allergic rhinitis or eczema	binary	166695	131774	34921	0.1435	0.1226	0.0117	0.0087	1.43346	0.614452	0.9665	ACE touchscreen question "Has a doctor ever told you that you have had any of the following conditions? (You can select more than one answer)" The following checks were performed: If code -7 was selected, then no additional choices were allowed. If code -3 was selected, then no additional choices were allowed. If the participant activated the Help button they were shown the message: If you do not…
Health and medical status		6148_1	Eye problems/disorders: Diabetes related eye disease	binary	54561	53099	1462	0.1513	0.3186	0.0599	0.1009	-1.42576	0.619975	0.7212	ACE touchscreen question "Has a doctor told you that you have any of the following problems with your eyes? (You can select more than one answer)" The following checks were performed: If code -7 was selected, then no additional choices were allowed. If code -3 was selected, then no additional choices were allowed. If code -1 was selected, then no additional choices were allowed. If the participan…
icd10		N12	Diagnoses - main ICD10: N12 Tubulo-interstitial nephritis, not specified as acute or chronic	binary	167020	166889	131	0.3486	-0.0747	0.2877	0.0775	1.42068	0.622487
icd10		S80	Diagnoses - main ICD10: S80 Superficial injury of lower leg	binary	167020	166893	127	0.3229	-0.3134	0.2841	0.3477	1.41712	0.623236
Molecular measures		30090_irnt	Platelet crit	continuous_irnt	162398			0.1008	0.1199	0.0083	0.0108	-1.40225	0.637273	0.9532	Result of "Platelet Crit" assay, performed on blood sample, obtained from UK Biobank assessment centre visit. Platelet Crit is a computed value that represents the platelet packed cell volume.
Molecular measures		30030_irnt	Haematocrit percentage	continuous_irnt	162399			0.0707	0.0807	0.0047	0.0054	-1.39686	0.640214	0.8822	Result of "Haematocrit" assay, performed on blood sample, obtained from UK Biobank assessment centre visit. Haematocrit Percentage is the relative volume of packed erythrocytes to whole blood, computed by the formula: (red blood cells x mean corpuscular volume) / 10. Analyser operating range was 0 to 99.9% Typical reference range is 35.4 to 47.2%
icd10		B37	Diagnoses - main ICD10: B37 Candidiasis	binary	167020	166915	105	-0.3993	0.1297	0.3104	0.2231	-1.38388	0.647579
Molecular measures		30240_irnt	Reticulocyte percentage	continuous_irnt	159805			0.086	0.0998	0.0061	0.0079	-1.38263	0.647579	0.9349	Result of "Reticulocytes Percentage" assay, performed on blood sample, obtained from UK Biobank assessment centre visit. Reticulocytes (Percentage) is the number of reticulocytes as a percentage of red blood cells.
Diagnosed disease		22137	Doctor diagnosed tuberculosis	binary	41234	41013	221	-0.0594	0.3916	0.2451	0.2156	-1.38161	0.647579		User asked "Has a doctor ever told you that you have had any of the conditions below?" "tuberculosis" was one of the options listed.
icd10		M72	Diagnoses - main ICD10: M72 Fibroblastic disorders	binary	167020	164628	2392	0.3395	0.1898	0.0473	0.0977	1.37912	0.647579	0.9949
icd10		Z80	Diagnoses - main ICD10: Z80 Family history of malignant neoplasm	binary	167020	166885	135	-0.3921	0.0356	0.2658	0.1612	-1.37585	0.648062
Physical measures		23101_irnt	Whole body fat-free mass	continuous_irnt	163815			0.1431	0.154	0.0059	0.0054	-1.36282	0.660232	0.9395	Body composition estimation by impedance measurement. Fat free mass Fat free mass in Kg. Increment in 0.1 Kg
icd10		T17	Diagnoses - main ICD10: T17 Foreign body in respiratory tract	binary	167020	166901	119	0.5715	-0.0045	0.3203	0.2802	1.3535	0.66804
icd10		T84	Diagnoses - main ICD10: T84 Complications of internal orthopaedic prosthetic devices, implants and grafts	binary	167020	165349	1671	0.0318	0.0926	0.0349	0.0285	-1.34936	0.668204
Diagnosed disease		22126	Doctor diagnosed hayfever or allergic rhinitis	binary	41234	32192	9042	0.1682	0.1229	0.0255	0.0219	1.34768	0.668204	1.048	User asked "Has a doctor ever told you that you have had any of the conditions below?" "hayfever or allergic rhinitis" was one of the options listed.
Physical measures		23125_irnt	Arm fat-free mass (left)	continuous_irnt	163764			0.1308	0.1402	0.0051	0.0048	-1.34217	0.671443	0.9293	Body composition estimation by impedance measurement. Left arm fat free mass Left arm fat free mass in Kg, 0.1 increments.
Physical measures		23105_irnt	Basal metabolic rate	continuous_irnt	163838			0.1396	0.1495	0.0055	0.0051	-1.31988	0.680551	0.9365	Body composition estimation by impedance measurement. Basal metabolic rate Return value in Kilo- Joules.
icd10		I60	Diagnoses - main ICD10: I60 Subarachnoid haemorrhage	binary	167020	166768	252	-0.1372	0.1311	0.1684	0.1109	-1.33061	0.680551
icd10		I31	Diagnoses - main ICD10: I31 Other diseases of pericardium	binary	167020	166758	262	0.1576	0.7198	0.1483	0.3977	-1.32454	0.680551	0.2323
icd10		I95	Diagnoses - main ICD10: I95 Hypotension	binary	167020	166662	358	0.1938	-0.1143	0.122	0.1984	1.32283	0.680551
icd10		D07	Diagnoses - main ICD10: D07 Carcinoma in situ of other and unspecified genital organs	binary	167020	166794	226	-0.2036	0.2883	0.1518	0.3406	-1.31913	0.680551
Health and medical status	Mental	20510	Recent feelings of depression	ordinal	51814			0.0358	0.0513	0.0093	0.0072	-1.31787	0.680551	0.8198	Question asked: "Over the last 2 weeks, how often have you been bothered by any of the following problems? [depressive symptoms] Feeling down, depressed, or hopeless"
Health and medical status		4814	Tinnitus severity/nuisance	ordinal	17502			0.0444	-0.0042	0.0266	0.0262	1.30168	0.692288		ACE touchscreen question "How much do these noises worry, annoy or upset you when they are at their worst?" ~F4814~ was collected from participants who hear or heard noises (such as ringing or buzzing) in their head or in one or both ears that last for more than five minutes at a time, as defined by their answers to ~F4803~ and except those who indicated they were completely deaf, as defined by t…
Physical measures		5104_irnt	3mm strong meridian angle (left)	continuous_irnt	35098			0.0308	0.043	0.0066	0.0067	-1.29721	0.692288	1.0695	This is the strong meridian angle of keratometry results taken at 3mm for the left eye (blank indicates no cylinder power)
Physical measures		23126_irnt	Arm predicted mass (left)	continuous_irnt	163756			0.1304	0.1395	0.0051	0.0048	-1.29934	0.692288	0.9324	Body composition estimation by impedance measurement. Left arm predicted mass. in Kg, 0.1 increments.
Health and medical status		2050	Frequency of depressed mood in last 2 weeks	ordinal	160713			0.0412	0.0484	0.0042	0.0036	-1.30158	0.692288	0.8761	ACE touchscreen question "Over the past two weeks, how often have you felt down, depressed or hopeless?" If the participant activated the Help button they were shown the message: Answer this question thinking about the past 2 weeks. If you are unsure, please provide an estimate or select Do not know.
icd10		C15	Diagnoses - main ICD10: C15 Malignant neoplasm of oesophagus	binary	167020	166623	397	0.1842	0.6993	0.1199	0.3796	-1.29394	0.692934	0.4504
icd10		K63	Diagnoses - main ICD10: K63 Other diseases of intestine	binary	167020	162611	4409	0.0531	0.0146	0.0206	0.0216	1.28986	0.69459	0.5212
Cancer code, sef-reported		20001_1023	Cancer code, self-reported: rectal cancer	binary	166988	166833	155	-0.0922	0.4503	0.2298	0.3572	-1.27727	0.702977		Code for cancer. If the participant was uncertain of the type of cancer they had had, then they described it to the interviewer (a trained nurse) who attempted to place it within the coding tree. If the cancer could not be located in the coding tree then the interviewer entered a free-text description of it. These free-text descriptions were subsequently examined by a doctor and, where possible, …
Physical measures		5105_irnt	6mm strong meridian angle (left)	continuous_irnt	29265			0.0334	0.0485	0.0077	0.009	-1.27486	0.702977	0.8269	This is the strong meridian angle of keratometry results taken at 6mm for the left eye (blank indicates no cylinder power)
Physical measures		5984_irnt	ECG, load	continuous_irnt	25095			0.0458	0.0308	0.008	0.0086	1.27707	0.702977	0.8711	ECG, load The Bike Test consists of many phases. A phase is generally divided into number of stages. At various points during the test, called trends, readings about heart rate, workload etc are recorded. This field contains load in Watts at the time of the trend entry.
icd10		J34	Diagnoses - main ICD10: J34 Other disorders of nose and nasal sinuses	binary	167020	164316	2704	0.0358	0.0976	0.0247	0.0422	-1.26388	0.711453	0.2507
icd10		D21	Diagnoses - main ICD10: D21 Other benign neoplasms of connective and other soft tissue	binary	167020	166869	151	0.3905	-0.0181	0.2794	0.1633	1.26258	0.711453
Cognitive functions		4968	FI4 : positional arithmetic	binary	53708	6625	47083	0.1141	0.1489	0.022	0.0174	-1.24068	0.716839		ACE touchscreen question "11 12 13 14 15 16 17 18 Divide the sixth number to the right of twelve by three. Is the answer?". Part 4 of Fluid Intelligence test. Offered choice from 5, 6, 7, or 8.
icd10		L30	Diagnoses - main ICD10: L30 Other dermatitis	binary	167020	166861	159	0.38	-0.0622	0.2856	0.211	1.24532	0.716839
Physical measures		6032_irnt	Maximum workload during fitness test	continuous_irnt	25165			0.0475	0.0317	0.0085	0.0093	1.25405	0.716839	0.9059	Maximum workload attained during the fitness test The Bike Test consists of three phases, a Pre-Test phase, where a resting ECG is recorded for some time. An Activity phase, where the participant cycles for a set period of time with increasing cycling workload, and finally a Recovery phase, where the participant has stopped pedalling and an ECG is recorded.
Molecular measures		30300_irnt	High light scatter reticulocyte count	continuous_irnt	159806			0.0926	0.1052	0.0061	0.0081	-1.2426	0.716839	0.9389	Result of "High Light Scatter Reticulocytes Number" assay, performed on blood sample, obtained from UK Biobank assessment centre visit. High Light Scatter Reticulocytes Count is calculated as: (HLR / Total Erythrocytes) x red blood cells
Diagnosed disease	Mental	20544_7	Mental health problems ever diagnosed by a professional: Obsessive compulsive disorder (OCD)	binary	51811	51520	291	0.0271	0.2934	0.1725	0.1274	-1.24181	0.716839	*******************	Question asked: "Have you been diagnosed with one or more of the following mental health problems by a professional, even if you don't have it currently? (tick all that apply):" Participant was offered a set of options which have been combined here into a single answer
icd10		Z53	Diagnoses - main ICD10: Z53 Persons encountering health services for specifie procedures, not carried out	binary	167020	166182	838	-4.5329e-05	0.1063	0.0638	0.0575	-1.23819	0.716839
icd10		M22	Diagnoses - main ICD10: M22 Disorders of patella	binary	167020	166860	160	-0.1175	0.2408	0.236	0.1682	-1.23635	0.716839
icd10		K42	Diagnoses - main ICD10: K42 Umbilical hernia	binary	167020	165105	1915	0.1433	0.0145	0.036	0.0978	1.2359	0.716839	*******************
icd10		A08	Diagnoses - main ICD10: A08 Viral and other specified intestinal infections	binary	167020	166834	186	0.1147	-0.1875	0.1925	0.1513	1.23426	0.716839
icd10		C78	Diagnoses - main ICD10: C78 Secondary malignant neoplasm of respiratory and digestive organs	binary	167020	166445	575	0.027	-0.0888	0.0779	0.0529	1.22977	0.71707
icd10		N35	Diagnoses - main ICD10: N35 Urethral stricture	binary	167020	165847	1173	0.0439	0.1426	0.0526	0.0607	-1.22884	0.71707	0.2878
Physical measures		23109_irnt	Impedance of arm (right)	continuous_irnt	163831			0.1168	0.1246	0.0045	0.0045	-1.22565	0.717554	0.9062	Body composition estimation by impedance measurement. Impedance of right arm, oh Measured impedance of right arm. Range 150 - 1200 (ohms) in 1 (ohms) increments.
Molecular measures		30290_irnt	High light scatter reticulocyte percentage	continuous_irnt	159806			0.0922	0.1048	0.0061	0.0083	-1.22324	0.717554	0.9452	Result of "High Light Scatter Reticulocytes Percentage" assay, performed on blood sample, obtained from UK Biobank assessment centre visit. High Light Scatter Reticulocytes (Percentage) is computed as: (HLR / Total Erythrocytes) x 100.
icd10		M13	Diagnoses - main ICD10: M13 Other arthritis	binary	167020	166575	445	0.0206	0.1547	0.0852	0.07	-1.21613	0.723107
Health and medical status		6152_100	Blood clot, DVT, bronchitis, emphysema, asthma, rhinitis, eczema, allergy diagnosed by doctor: None of the above	binary	166695	49989	116706	0.1371	0.1195	0.0117	0.0087	1.20712	0.724666	0.9264	ACE touchscreen question "Has a doctor ever told you that you have had any of the following conditions? (You can select more than one answer)" The following checks were performed: If code -7 was selected, then no additional choices were allowed. If code -3 was selected, then no additional choices were allowed. If the participant activated the Help button they were shown the message: If you do not…
icd10		Z08	Diagnoses - main ICD10: Z08 Follow-up examination after treatment for malignant neoplasm	binary	167020	164368	2652	-0.0113	0.0582	0.0295	0.0493	-1.2097	0.724666
icd10		H04	Diagnoses - main ICD10: H04 Disorders of lachrymal system	binary	167020	166568	452	-0.0649	0.0806	0.1106	0.0476	-1.20839	0.724666
icd10		J93	Diagnoses - main ICD10: J93 Pneumothorax	binary	167020	166816	204	-0.1492	0.3351	0.1866	0.3643	-1.18321	0.741171
Physical measures		12338_irnt	P duration	continuous_irnt	5250			0.0603	-0.0051	0.0403	0.0373	1.19099	0.741171		P duration during ECG
Molecular measures		30070_irnt	Red blood cell (erythrocyte) distribution width	continuous_irnt	162398			0.0898	0.104	0.0087	0.0083	-1.18096	0.741171	0.9695	Result of "Red Distribution Width" assay, performed on blood sample, obtained from UK Biobank assessment centre visit. Red blood cell Distribution Width is the size distribution spread of the erythrocyte population derived from the red blood cell histogram. It is the coefficient of variation (CV) expressed in % of the red blood cell size distribution.
Diagnosed disease	Mental	20544_3	Mental health problems ever diagnosed by a professional: Any other type of psychosis or psychotic illness	binary	51810	51629	181	0.4194	0.0551	0.2554	0.1722	1.18268	0.741171		Question asked: "Have you been diagnosed with one or more of the following mental health problems by a professional, even if you don't have it currently? (tick all that apply):" Participant was offered a set of options which have been combined here into a single answer
icd10		F10	Diagnoses - main ICD10: F10 Mental and behavioural disorders due to use of alcohol	binary	167020	166439	581	0.2004	0.5161	0.0856	0.2529	-1.18242	0.741171	0.3302
Life style		20401	Ever addicted to any substance or behaviour	binary	51336	47661	3675	0.1169	0.0611	0.0354	0.0317	1.17427	0.743168	0.7109	Question asked: "Have you been addicted to or dependent on one or more things, including substances (not cigarettes/coffee) or behaviours (such as gambling)?"
icd10		F31	Diagnoses - main ICD10: F31 Bipolar affective disorder	binary	167020	166871	149	0.3589	0.7409	0.2714	0.1791	-1.17477	0.743168	1.0589
Health and medical status		1200	Sleeplessness / insomnia	ordinal	166751			0.0677	0.0742	0.0041	0.0038	-1.16276	0.754339	0.8226	ACE touchscreen question "Do you have trouble falling asleep at night or do you wake up in the middle of the night?" If the participant activated the Help button they were shown the message: If this varies a lot, answer this question in relation to the last 4 weeks.
Health and medical status	Mental	20480	Ever self-harmed	binary	51856	50262	1594	0.0717	0.1416	0.0544	0.0259	-1.16015	0.754433	0.5088	Question asked: "Have you deliberately harmed yourself, whether or not you meant to end your life?"
icd10		Z11	Diagnoses - main ICD10: Z11 Special screening examination for infectious and parasitic diseases	binary	167020	166900	120	-0.304	0.1352	0.2972	0.238	-1.15351	0.759578
Physical measures		1747_5	Hair colour (natural, before greying): Black	binary	166357	153613	12744	0.2951	0.4601	0.0667	0.127	-1.15023	0.760527	1.046	ACE touchscreen question "What best describes your natural hair colour? (If your hair colour is grey, the colour before you went grey)" If the participant activated the Help button they were shown the message: If you are unsure, please select the colour closest to your natural adult hair colour or select Do not know.
Molecular measures		30270_irnt	Mean sphered cell volume	continuous_irnt	159806			0.0858	0.0997	0.008	0.0092	-1.14011	0.763763	0.9846	Result of "Mean Sphered Cells Volume" assay, performed on blood sample, obtained from UK Biobank assessment centre visit.
icd10		E87	Diagnoses - main ICD10: E87 Other disorders of fluid, electrolyte and acid-base balance	binary	167020	166729	291	0.1725	0.4097	0.1291	0.1627	-1.14205	0.763763	0.0096
icd10		A09	Diagnoses - main ICD10: A09 Diarrhoea and gastro-enteritis of presumed infectious origin	binary	167020	166206	814	-0.0733	0.0106	0.0607	0.0416	-1.14015	0.763763
icd10		R59	Diagnoses - main ICD10: R59 Enlarged lymph nodes	binary	167020	166561	459	-0.1146	0.0348	0.0949	0.0913	-1.1345	0.765819
icd10		R47	Diagnoses - main ICD10: R47 Speech disturbances, not elsewhere classified	binary	167020	166847	173	-0.185	0.2903	0.2341	0.3479	-1.13348	0.765819
Cognitive functions		4957	FI3 : word interpolation	binary	54131	8857	45274	0.1685	0.2053	0.022	0.0243	-1.12266	0.772562	1.0762	ACE touchscreen question "Bud is to Flower as Child is to?". Part 3 of Fluid Intelligence test. Offered choice from Grow, Develop, Improve, Adult and Old.
Health and medical status		6152_5	Blood clot, DVT, bronchitis, emphysema, asthma, rhinitis, eczema, allergy diagnosed by doctor: Blood clot in the leg (DVT)	binary	166695	163634	3061	0.1336	0.0962	0.0286	0.0172	1.12064	0.772562	0.5075	ACE touchscreen question "Has a doctor ever told you that you have had any of the following conditions? (You can select more than one answer)" The following checks were performed: If code -7 was selected, then no additional choices were allowed. If code -3 was selected, then no additional choices were allowed. If the participant activated the Help button they were shown the message: If you do not…
Cognitive functions		4241_irnt	Signal-to-noise-ratio (SNR) of triplet (right)	continuous_irnt	54195			0.0117	0.0186	0.0044	0.0043	-1.12154	0.772562	0.6228	This is the signal-to-noise ratio for each round (right ear)
Diagnosed disease		22134	Doctor diagnosed bronchiectasis	binary	41234	40876	358	0.0812	0.3101	0.1613	0.127	-1.11497	0.774911	-0.4094	User asked "Has a doctor ever told you that you have had any of the conditions below?" "bronchiectasis" was one of the options listed.
Physical measures		12340_irnt	QRS duration	continuous_irnt	5273			0.112	0.037	0.0429	0.0519	1.11383	0.774911		QRS duration during ECG measurement
icd10		E11	Diagnoses - main ICD10: E11 Non-insulin-dependent diabetes mellitus	binary	167020	166529	491	0.1436	0.41	0.0982	0.2195	-1.10785	0.779323	1.1374
Health and medical status		2159	Ever had same-sex intercourse	binary	152361	146011	6350	0.0757	0.1054	0.0155	0.0222	-1.09693	0.782669	0.5628	ACE touchscreen question "Have you ever had sexual intercourse with someone of the same sex?" If the participant activated the Help button they were shown the message: Sexual intercourse includes vaginal, oral or anal intercourse. ~F2159~ was collected from all participants except those who indicated they never had had sexual intercourse, as defined by their answers to ~F2139~
Physical measures		5263_irnt	Intra-ocular pressure, Goldmann-correlated (left)	continuous_irnt	35819			0.1041	0.1169	0.0082	0.0083	-1.09707	0.782669	0.959	goldmann-correlated intraocular pressure for left eye
icd10		N02	Diagnoses - main ICD10: N02 Recurrent and persistent haematuria	binary	167020	166775	245	-0.2262	0.0483	0.171	0.1828	-1.09662	0.782669
icd10		N28	Diagnoses - main ICD10: N28 Other disorders of kidney and ureter, not elsewhere classified	binary	167020	166774	246	0.2979	0.013	0.1712	0.1958	1.09539	0.782669	*******************
Physical measures		23110_irnt	Impedance of arm (left)	continuous_irnt	163833			0.116	0.123	0.0046	0.0045	-1.08779	0.789151	0.8973	Body composition estimation by impedance measurement. Impedance of left arm, ohm Measured impedance of left arm. Range 150 - 1200 (ohms) in 1 (ohms) increments.
Health and medical status	Mental	2000	Worry too long after embarrassment	binary	160798	96405	64393	0.1156	0.1048	0.0078	0.0062	1.08391	0.790973	0.8328	ACE touchscreen question "Do you worry too long after an embarrassing experience?" If the participant activated the Help button they were shown the message: Work through these questions quickly and do not think about the exact meaning of the question
icd10		D50	Diagnoses - main ICD10: D50 Iron deficiency anaemia	binary	167020	165844	1176	0.0259	0.0897	0.051	0.0297	-1.08103	0.791536	1.1829
Physical measures		5161_irnt	6mm regularity index (right)	continuous_irnt	16844			0.0423	0.0252	0.0104	0.0121	1.07175	0.795127	0.6759	This is the regularity index as part of the keratometry result taken at 6mm for the right eye
icd10		H34	Diagnoses - main ICD10: H34 Retinal vascular occlusions	binary	167020	166835	185	0.0828	0.5122	0.2139	0.3371	-1.07555	0.795127	0.3574
icd10		H26	Diagnoses - main ICD10: H26 Other cataract	binary	167020	161908	5112	0.0825	0.0542	0.0208	0.0163	1.07092	0.795127	1.0062
Molecular measures		30020_irnt	Haemoglobin concentration	continuous_irnt	162398			0.0768	0.0852	0.0052	0.006	-1.05796	0.80845	0.8832	Result of "Haemoglobin Concentration" assay, performed on blood sample, obtained from UK Biobank assessment centre visit. Analyser operating range was 0 to 99.9g/dL Typical reference range is 12.1 to 16.3g/dL
icd10		N17	Diagnoses - main ICD10: N17 Acute renal failure	binary	167020	166492	528	0.0894	-0.1052	0.0875	0.1625	1.0544	0.809912
Physical measures		5983_irnt	ECG, heart rate	continuous_irnt	25065			0.0526	0.0677	0.0095	0.0109	-1.04434	0.819656	0.5498	ECG, heart rate The Bike Test consists of many phases. A phase is generally divided into number of stages. At various points during the test, called trends, readings about heart rate, workload etc are recorded. This field contains heart rate (beats per minute) at the time of the trend entry
icd10		C16	Diagnoses - main ICD10: C16 Malignant neoplasm of stomach	binary	167020	166747	273	0.0568	-0.3208	0.1408	0.3357	1.03727	0.825614
Physical measures		5221	Index of best refractometry result (right)	ordinal	36406			-0.0159	0.0005	0.0127	0.0096	-1.03014	0.828423		zero-based index of most representative refractometry result for right eye
Health and medical status	Mental	1930	Miserableness	binary	164119	105807	58312	0.1083	0.0977	0.0086	0.0068	0.966838	0.828423	0.9107	ACE touchscreen question "Do you ever feel 'just miserable' for no reason?" If the participant activated the Help button they were shown the message: Work through these questions quickly and do not think about the exact meaning of the question
Cognitive functions		5012	FI8 : chained arithmetic	binary	34860	9864	24996	0.1394	0.1693	0.025	0.0188	-0.955882	0.828423	1.1594	ACE touchscreen question "If David is twenty-one and Owen is nineteen and Daniel is nine years younger than David, what is half their combined age?". Part 8 of Fluid Intelligence test. Offered choice from 25, 26, 27, 28 or 29.
icd10		J39	Diagnoses - main ICD10: J39 Other diseases of upper respiratory tract	binary	167020	166827	193	-0.1202	0.1801	0.2043	0.2116	-1.02097	0.828423
Health and medical status	Mental	20126_2	Bipolar and major depression status: Bipolar II Disorder	binary	41187	40912	275	0.2729	-0.0211	0.2083	0.2161	0.979521	0.828423		Bipolar and major depression status. This derived data field has come from Professor Jill Pell from the Institute of Health &amp; Wellbeing, University of Glasgow. Methods on how these fields were derived can be found in the Additional Resources tab.
Health and medical status	Mental	20463	Ever heard an un-real voice	binary	51691	50883	808	0.1284	0.0224	0.0883	0.0586	1.00023	0.828423		Question asked: "Did you ever hear things that other people said did not exist, like strange voices coming from inside your head talking to you or about you, or voices coming out of the air when there was no one around?"
Health and medical status	Mental	20474	Ever believed in un-real communications or signs	binary	51789	51415	374	0.0662	-0.1161	0.1442	0.1285	0.943839	0.828423		Question asked: "Did you ever believe that a strange force was trying to communicate directly with you by sending special signs or signals that you could understand but that no one else could understand (for example through the radio or television)?"
icd10		I26	Diagnoses - main ICD10: I26 Pulmonary embolism	binary	167020	165827	1193	0.129	0.0432	0.0527	0.0657	1.0187	0.828423
Molecular measures		30230	Nucleated red blood cell percentage	ordinal	162095			-0.0032	0.0001	0.0026	0.0023	-0.950649	0.828423		Result of "Nucleated Red Blood Cells Percentage" assay, performed on blood sample, obtained from UK Biobank assessment centre visit. Nucleated Red Blood Cells (Percentage) is defined as the number of nucleated red blood cells per 100 white blood cells.
Physical measures		5108_irnt	3mm asymmetry angle (right)	continuous_irnt	34293			0.0217	0.0307	0.006	0.0065	-1.01742	0.828423	1.0523	This is the asymmetric angle of keratometry results taken at 3mm for the right eye (blank indicates no asymmetry)
Physical measures		5109_irnt	6mm asymmetry angle (right)	continuous_irnt	16827			0.0276	0.0431	0.011	0.0103	-1.02857	0.828423	0.8011	This is the asymmetric angle of keratometry results taken at 6mm for the right eye (blank indicates no asymmetry)
Physical measures		5134_irnt	6mm strong meridian (left)	continuous_irnt	29265			0.1799	0.199	0.0147	0.0136	-0.953749	0.828423	0.9365	[keratometry@6mm/left] strong meridian
Physical measures		3143_irnt	Ankle spacing width	continuous_irnt	95426			0.143	0.1525	0.0067	0.0073	-0.958765	0.828423	0.9199	Ankle width as indicated by the spacing between measurement transducer pads on heel
Molecular measures		30110_irnt	Platelet distribution width	continuous_irnt	162398			0.0967	0.1107	0.0095	0.0104	-0.993908	0.828423	0.9727	Result of "Platelet Distribution Width" assay, performed on blood sample, obtained from UK Biobank assessment centre visit. Platelet Distribution Width is the coefficient of variation of platelet size.
Molecular measures		30130_irnt	Monocyte count	continuous_irnt	162098			0.0889	0.1021	0.0083	0.0106	-0.980471	0.828423	0.9789	Result of "Monocytes Number" assay, performed on blood sample, obtained from UK Biobank assessment centre visit. Monocyte count is the proportion of ( monoctyes / 100 ) x white blood cell count.
Molecular measures		30220_irnt	Basophill percentage	continuous_irnt	162101			0.021	0.0246	0.0026	0.0028	-0.942163	0.828423	1.0167	Result of "Basophils Percentage" assay, performed on blood sample, obtained from UK Biobank assessment centre visit. Basophils (Percentage) is calculated as the proportion of basophils in the leukocytes.
icd10		M25	Diagnoses - main ICD10: M25 Other joint disorders, not elsewhere classified	binary	167020	163789	3231	0.033	0.0624	0.0216	0.0192	-1.01731	0.828423	0.3985
icd10		E10	Diagnoses - main ICD10: E10 Insulin-dependent diabetes mellitus	binary	167020	166734	286	0.101	0.3919	0.149	0.2444	-1.01629	0.828423	1.132
icd10		R69	Diagnoses - main ICD10: R69 Unknown and unspecified causes of morbidity	binary	167020	163358	3662	0.0158	0.0431	0.0225	0.0151	-1.00748	0.828423
icd10		K37	Diagnoses - main ICD10: K37 Unspecified appendicitis	binary	167020	166839	181	0.1946	-0.1123	0.2035	0.2274	1.0057	0.828423
icd10		H71	Diagnoses - main ICD10: H71 Cholesteatoma of middle ear	binary	167020	166840	180	0.1193	0.4582	0.2368	0.2427	-0.999459	0.828423	-0.1186
icd10		I21	Diagnoses - main ICD10: I21 Acute myocardial infarction	binary	167020	162312	4708	0.1537	0.2319	0.0222	0.0751	-0.998563	0.828423	0.8473
icd10		J84	Diagnoses - main ICD10: J84 Other interstitial pulmonary diseases	binary	167020	166830	190	0.453	0.1367	0.1961	0.2527	0.98886	0.828423
icd10		H83	Diagnoses - main ICD10: H83 Other diseases of inner ear	binary	167020	166771	249	0.1268	-0.0892	0.1498	0.1626	0.976998	0.828423
icd10		M71	Diagnoses - main ICD10: M71 Other bursopathies	binary	167020	166816	204	0.018	-0.2252	0.1884	0.1637	0.974421	0.828423
icd10		Z52	Diagnoses - main ICD10: Z52 Donors of organs and tissues	binary	167020	166901	119	-0.3779	-0.0257	0.274	0.2358	-0.974291	0.828423
icd10		R14	Diagnoses - main ICD10: R14 Flatulence and related conditions	binary	167020	166898	122	0.1476	0.4854	0.2946	0.1831	-0.973868	0.828423
Cancer code, sef-reported		20001_1062	Cancer code, self-reported: squamous cell carcinoma	binary	166988	166766	222	0.2447	-0.0029	0.1892	0.1711	0.970631	0.828423		Code for cancer. If the participant was uncertain of the type of cancer they had had, then they described it to the interviewer (a trained nurse) who attempted to place it within the coding tree. If the cancer could not be located in the coding tree then the interviewer entered a free-text description of it. These free-text descriptions were subsequently examined by a doctor and, where possible, …
icd10		I67	Diagnoses - main ICD10: I67 Other cerebrovascular diseases	binary	167020	166822	198	-0.184	0.0923	0.1853	0.2167	-0.969056	0.828423
icd10		K26	Diagnoses - main ICD10: K26 Duodenal ulcer	binary	167020	166174	846	0.0215	0.1507	0.0598	0.1195	-0.966867	0.828423
icd10		K83	Diagnoses - main ICD10: K83 Other diseases of biliary tract	binary	167020	166593	427	0.128	-0.0052	0.0989	0.0961	0.965917	0.828423
icd10		L05	Diagnoses - main ICD10: L05 Pilonidal cyst	binary	167020	166729	291	0.2918	-0.157	0.1496	0.4439	0.958093	0.828423
icd10		Z50	Diagnoses - main ICD10: Z50 Care involving use of rehabilitation procedures	binary	167020	166902	118	0.2905	-0.1543	0.316	0.3405	0.957509	0.828423
icd10		K56	Diagnoses - main ICD10: K56 Paralytic ileus and intestinal obstruction without hernia	binary	167020	166222	798	0.0425	-0.0353	0.0644	0.0504	0.951365	0.828423
icd10		H50	Diagnoses - main ICD10: H50 Other strabismus	binary	167020	166734	286	0.1556	-0.0182	0.141	0.1172	0.947919	0.828423
icd10		G40	Diagnoses - main ICD10: G40 Epilepsy	binary	167020	166559	461	0.141	-0.0103	0.0915	0.131	0.94686	0.828423
icd10		R22	Diagnoses - main ICD10: R22 Localised swelling, mass and lump of skin and subcutaneous tissue	binary	167020	166409	611	-0.0797	0.0156	0.0731	0.0698	-0.942888	0.828423
Diagnosed disease		22129	Doctor diagnosed chronic bronchitis	binary	41234	40775	459	-0.1602	0.0102	0.1397	0.1153	-0.940731	0.828423		User asked "Has a doctor ever told you that you have had any of the conditions below?" "chronic bronchitis" was one of the options listed.
icd10		J03	Diagnoses - main ICD10: J03 Acute tonsillitis	binary	167020	166839	181	0.2795	0.0106	0.2349	0.163	0.940491	0.828423	*******************
Health and medical status		2070	Frequency of tenseness / restlessness in last 2 weeks	ordinal	161535			0.0433	0.0481	0.0036	0.0033	-0.982872	0.828423	0.8964	ACE touchscreen question "Over the past two weeks, how often have you felt tense, fidgety or restless?" If the participant activated the Help button they were shown the message: Answer this question thinking about the past 2 weeks. If you are unsure, please provide an estimate or select Do not know.
Health and medical status	Mental	20505	Recent easy annoyance or irritability	ordinal	51725			0.0575	0.0458	0.0086	0.0079	1.0019	0.828423	0.9221	Question asked: "Over the last 2 weeks, how often have you been bothered by any of the following problems? [anxiety symptoms] Becoming easily annoyed or irritable"
Cognitive functions		4260	Round of numeric memory test	ordinal	17345			0.1358	0.1004	0.0277	0.0257	0.936856	0.830177	0.6433	Indicates which round of the numeric memory test the associated results belong to.
Physical measures		46_irnt	Hand grip strength (left)	continuous_irnt	166424			0.0672	0.0635	0.0028	0.0028	0.934391	0.830501	0.8621	Left grip strength
Health and medical status		6148_100	Eye problems/disorders: None of the above	binary	54561	12362	42199	0.0589	0.0374	0.0161	0.0167	0.926845	0.83169	1.1952	ACE touchscreen question "Has a doctor told you that you have any of the following problems with your eyes? (You can select more than one answer)" The following checks were performed: If code -7 was selected, then no additional choices were allowed. If code -3 was selected, then no additional choices were allowed. If code -1 was selected, then no additional choices were allowed. If the participan…
Physical measures		5262_irnt	Intra-ocular pressure, corneal-compensated (left)	continuous_irnt	35819			0.0674	0.0771	0.0074	0.0074	-0.926883	0.83169	1.0642	corneal-compensated intraocular pressure for left eye
icd10		C67	Diagnoses - main ICD10: C67 Malignant neoplasm of bladder	binary	167020	165857	1163	0.0822	0.2463	0.0483	0.17	-0.928544	0.83169	0.5309
Psychosocial factors		4526	Happiness	ordinal	55552			0.0679	0.058	0.0081	0.0074	0.902352	0.832478	1.0652	ACE touchscreen question "In general how happy are you?"
icd10		K30	Diagnoses - main ICD10: K30 Dyspepsia	binary	167020	164258	2762	-0.0063	0.0178	0.0217	0.0145	-0.923419	0.832478
Physical measures		5100_irnt	3mm weak meridian angle (right)	continuous_irnt	35174			0.0172	0.0249	0.0058	0.0063	-0.899187	0.832478	0.6281	This is the weak meridian angle of keratometry results taken at 3mm for the right eye (blank indicates no cylinder power)
Physical measures		5111_irnt	3mm asymmetry angle (left)	continuous_irnt	34075			0.02	0.0276	0.0057	0.0061	-0.910327	0.832478		This is the asymmetric angle of keratometry results taken at 3mm for the left eye (blank indicates no asymmetry)
Physical measures		5133_irnt	6mm strong meridian (right)	continuous_irnt	29828			0.1794	0.1958	0.0129	0.0133	-0.88513	0.832478	0.9425	This is the strong meridian angle of keratometry results taken at 6mm for the right eye
Psychosocial factors		5375_irnt	Longest period of unenthusiasm / disinterest	continuous_irnt	13602			0.009	0.0253	0.0132	0.0127	-0.88986	0.832478	0.3365	ACE touchscreen question "How many weeks was the longest period when you were uninterested in things or unable to enjoy the things you used to?" The following checks were performed: If answer If answer > 999 then rejected ~F5375~ was collected from participants who indicated they have been uninterested in things or unable to enjoy things they used to for at least a week, as defined by their answe…
Molecular measures		30100_irnt	Mean platelet (thrombocyte) volume	continuous_irnt	162398			0.149	0.1719	0.0162	0.0192	-0.911577	0.832478	0.9957	Result of "Mean Platelet Volume" assay, performed on blood sample, obtained from UK Biobank assessment centre visit. Mean Platelet Volume is the average volume of individual platelets derived from the platelet histogram.
Molecular measures		30190_irnt	Monocyte percentage	continuous_irnt	162101			0.0798	0.0921	0.0087	0.0103	-0.912288	0.832478	1.0164	Result of "Monocytes Percentage" assay, performed on blood sample, obtained from UK Biobank assessment centre visit. Monocytes (percentage) is calculated as the proportion of monocytes in the leukocytes.
icd10		G44	Diagnoses - main ICD10: G44 Other headache syndromes	binary	167020	166905	115	0.401	0.0787	0.2926	0.2013	0.907486	0.832478	-0.4097
icd10		S92	Diagnoses - main ICD10: S92 Fracture of foot, except ankle	binary	167020	166610	410	0.1151	-0.0693	0.109	0.1718	0.906318	0.832478
icd10		C82	Diagnoses - main ICD10: C82 Follicular [nodular] non-Hodgkin's lymphoma	binary	167020	166851	169	-0.0059	0.3	0.2203	0.256	-0.905727	0.832478
icd10		K29	Diagnoses - main ICD10: K29 Gastritis and duodenitis	binary	167020	161505	5515	0.0363	0.0544	0.0157	0.0125	-0.901916	0.832478
Diagnosed disease	Mental	20544_4	Mental health problems ever diagnosed by a professional: A personality disorder	binary	51811	51665	146	0.2456	-0.1364	0.2605	0.3395	0.892678	0.832478		Question asked: "Have you been diagnosed with one or more of the following mental health problems by a professional, even if you don't have it currently? (tick all that apply):" Participant was offered a set of options which have been combined here into a single answer
icd10		J02	Diagnoses - main ICD10: J02 Acute pharyngitis	binary	167020	166855	165	0.3341	0.0612	0.2216	0.2114	0.891067	0.832478	-0.0057
icd10		J18	Diagnoses - main ICD10: J18 Pneumonia, organism unspecified	binary	167020	164485	2535	0.0302	-0.0072	0.0259	0.0331	0.889866	0.832478
icd10		K59	Diagnoses - main ICD10: K59 Other functional intestinal disorders	binary	167020	165772	1248	0.0632	0.0181	0.0447	0.0241	0.888095	0.832478	0.7429
icd10		M70	Diagnoses - main ICD10: M70 Soft tissue disorders related to use, overuse and pressure	binary	167020	166424	596	0.0212	-0.0878	0.0771	0.0957	0.886944	0.832478
icd10		H40	Diagnoses - main ICD10: H40 Glaucoma	binary	167020	166191	829	0.0882	0.0172	0.0607	0.0527	0.883247	0.832478
icd10		B34	Diagnoses - main ICD10: B34 Viral infection of unspecified site	binary	167020	166637	383	-0.0676	0.052	0.1105	0.0788	-0.881232	0.832478
Cognitive functions		4283	Number of rounds of numeric memory test performed	ordinal	17375			0.1368	0.1022	0.0276	0.0256	0.919121	0.832478	0.6262	Number of rounds of numeric memory test performed
Health and medical status	Mental	4631	Ever unenthusiastic/disinterested for a whole week	binary	53680	36850	16830	0.0993	0.0806	0.0158	0.0131	0.911112	0.832478	0.9807	ACE touchscreen question "Have you ever had a time when you were uninterested in things or unable to enjoy the things you used to for at least a whole week? "
icd10		R15	Diagnoses - main ICD10: R15 Faecal incontinence	binary	167020	166852	168	0.2255	0.0258	0.2232	0.047	0.875513	0.836794	-0.5086
icd10		S72	Diagnoses - main ICD10: S72 Fracture of femur	binary	167020	166288	732	-0.0209	0.0563	0.0727	0.0514	-0.867074	0.837205
icd10		R49	Diagnoses - main ICD10: R49 Voice disturbances	binary	167020	166764	256	-0.041	-0.2089	0.154	0.1174	0.867046	0.837205
icd10		H92	Diagnoses - main ICD10: H92 Otalgia and effusion of ear	binary	167020	166904	116	0.1564	-0.1846	0.294	0.2636	0.863579	0.837205
icd10		A41	Diagnoses - main ICD10: A41 Other septicaemia	binary	167020	166478	542	0.1064	0.0059	0.0723	0.0912	0.863537	0.837205	*******************
icd10		R56	Diagnoses - main ICD10: R56 Convulsions, not elsewhere classified	binary	167020	166392	628	-0.0048	-0.117	0.0779	0.104	0.863475	0.837205
icd10		K60	Diagnoses - main ICD10: K60 Fissure and fistula of anal and rectal regions	binary	167020	165767	1253	0.1313	0.0655	0.0481	0.0592	0.86264	0.837205
Health and medical status	Mental	20425	Ever worried more than most people would in similar situation	binary	44206	34628	9578	0.1328	0.1098	0.0205	0.0173	0.857433	0.838739	0.7775	Question asked: "People differ a lot in how much they worry about things. Did you ever have a time when you worried a lot more than most people would in your situation?"
Health and medical status		22504	Bring up phlegm/sputum/mucus on most days	binary	41234	36718	4516	0.0886	0.1326	0.0329	0.0394	-0.857198	0.838739	0.6985	Participant asked "Do you bring up phlegm/sputum/mucus on most days?"
Health and medical status		6150_1	Vascular/heart problems diagnosed by doctor: Heart attack	binary	166663	159942	6721	0.1828	0.2353	0.0178	0.06	-0.838864	0.839918	0.6655	ACE touchscreen question "Has a doctor ever told you that you have had any of the following conditions? (You can select more than one answer)" The following checks were performed: If code -7 was selected, then no additional choices were allowed. If code -3 was selected, then no additional choices were allowed. If the participant activated the Help button they were shown the message: If you do not…
Physical measures		5254_irnt	Intra-ocular pressure, corneal-compensated (right)	continuous_irnt	35861			0.0674	0.0767	0.0078	0.0079	-0.837702	0.839918	1.0564	corneal-compensated intraocular pressure for right eye
Molecular measures		30260_irnt	Mean reticulocyte volume	continuous_irnt	159806			0.088	0.0988	0.0085	0.0096	-0.842286	0.839918	0.9811	Result of "Mean Reticulocytes Volume" assay, performed on blood sample, obtained from UK Biobank assessment centre visit. Mean Reticulocytes volume is the average volume of all reticulocytes, calculated from the reticulocytes (percentage).
icd10		Q21	Diagnoses - main ICD10: Q21 Congenital malformations of cardiac septa	binary	167020	166868	152	0.028	0.3068	0.239	0.2263	-0.847058	0.839918	*******************
icd10		I24	Diagnoses - main ICD10: I24 Other acute ischaemic heart diseases	binary	167020	166663	357	0.3132	0.0298	0.1258	0.3108	0.845228	0.839918
icd10		R39	Diagnoses - main ICD10: R39 Other symptoms and signs involving the urinary system	binary	167020	165212	1808	-0.0116	0.0556	0.0349	0.0715	-0.844614	0.839918
icd10		C71	Diagnoses - main ICD10: C71 Malignant neoplasm of brain	binary	167020	166800	220	0.225	-0.0322	0.1892	0.2396	0.842465	0.839918
icd10		B07	Diagnoses - main ICD10: B07 Viral warts	binary	167020	166822	198	-0.282	-0.0759	0.1814	0.1646	-0.841406	0.839918
icd10		H02	Diagnoses - main ICD10: H02 Other disorders of eyelid	binary	167020	165200	1820	0.0153	0.0514	0.0319	0.0288	-0.839978	0.839918	0.3954
icd10		K35	Diagnoses - main ICD10: K35 Acute appendicitis	binary	167020	165820	1200	0.0848	0.0244	0.056	0.0458	0.834901	0.840812
icd10		H33	Diagnoses - main ICD10: H33 Retinal detachments and breaks	binary	167020	165439	1581	0.1704	0.1111	0.0412	0.0584	0.829716	0.844229
icd10		G43	Diagnoses - main ICD10: G43 Migraine	binary	167020	166772	248	-0.0527	0.1014	0.1797	0.0485	-0.827916	0.844229
Physical measures		5115_irnt	3mm cylindrical power angle (right)	continuous_irnt	35170			0.0176	0.0246	0.0058	0.0063	-0.817442	0.845211	0.619	This is the cylindrical power angle of keratometry results taken at 3mm for the right eye (blank indicates none)
Molecular measures		30210_irnt	Eosinophill percentage	continuous_irnt	162101			0.0858	0.0948	0.0072	0.0083	-0.819096	0.845211	0.961	Result of "Eosinophils Percentage" assay, performed on blood sample, obtained from UK Biobank assessment centre visit. Eosinophils (Percentage) is calculated as the proportion of eosinophils in the leukocytes.
icd10		R52	Diagnoses - main ICD10: R52 Pain, not elsewhere classified	binary	167020	166896	124	0.0733	-0.2074	0.2892	0.1801	0.823906	0.845211
icd10		K74	Diagnoses - main ICD10: K74 Fibrosis and cirrhosis of liver	binary	167020	166894	126	0.3135	-0.0336	0.2926	0.3046	0.821792	0.845211
icd10		J36	Diagnoses - main ICD10: J36 Peritonsillar abscess	binary	167020	166819	201	0.2293	-0.0778	0.2005	0.3189	0.815253	0.845211
icd10		S86	Diagnoses - main ICD10: S86 Injury of muscle and tendon at lower leg level	binary	167020	166541	479	0.0814	0.2819	0.1024	0.2238	-0.814662	0.845211
icd10		H53	Diagnoses - main ICD10: H53 Visual disturbances	binary	167020	166734	286	0.2817	0.1168	0.1341	0.1522	0.812921	0.845211	0.9506
Health and medical status	Mental	20517	Trouble falling or staying asleep, or sleeping too much	ordinal	51844			0.0571	0.0468	0.01	0.0079	0.808222	0.848341	1.0664	Question asked: "Over the last 2 weeks, how often have you been bothered by any of the following problems? [depressive symptoms] Trouble falling or staying asleep, or sleeping too much"
Physical measures		1747_6	Hair colour (natural, before greying): Other	binary	166357	163428	2929	0.0945	0.046	0.0259	0.0548	0.800168	0.853046	0.253	ACE touchscreen question "What best describes your natural hair colour? (If your hair colour is grey, the colour before you went grey)" If the participant activated the Help button they were shown the message: If you are unsure, please select the colour closest to your natural adult hair colour or select Do not know.
icd10		T85	Diagnoses - main ICD10: T85 Complications of other internal prosthetic devices, implants and grafts	binary	167020	166418	602	0.1211	0.0466	0.0742	0.0559	0.801936	0.853046	-0.9633
Health and medical status	Mental	1980	Worrier / anxious feelings	binary	162378	84697	77681	0.1316	0.1426	0.01	0.0096	-0.793526	0.853778	0.8745	ACE touchscreen question "Are you a worrier?" If the participant activated the Help button they were shown the message: Work through these questions quickly and do not think about the exact meaning of the question
icd10		K02	Diagnoses - main ICD10: K02 Dental caries	binary	167020	165965	1055	0.0314	0.0895	0.0524	0.0507	-0.796844	0.853778	0.249
Cancer code, sef-reported		20001_1060	Cancer code, self-reported: non-melanoma skin cancer	binary	166988	166674	314	-0.087	0.1036	0.1284	0.2023	-0.795467	0.853778		Code for cancer. If the participant was uncertain of the type of cancer they had had, then they described it to the interviewer (a trained nurse) who attempted to place it within the coding tree. If the cancer could not be located in the coding tree then the interviewer entered a free-text description of it. These free-text descriptions were subsequently examined by a doctor and, where possible, …
icd10		M19	Diagnoses - main ICD10: M19 Other arthrosis	binary	167020	165371	1649	0.0151	0.0538	0.039	0.0296	-0.790428	0.854013
icd10		Z87	Diagnoses - main ICD10: Z87 Personal history of other diseases and conditions	binary	167020	166908	112	0.1354	-0.1903	0.2982	0.2852	0.78933	0.854013
Cognitive functions		4935	FI1 : numeric addition test	binary	54159	2134	52025	0.0234	0.0664	0.0385	0.0391	-0.783626	0.85573		ACE touchscreen question "Add the following numbers together: 1 2 3 4 5 - is the answer?". Part 1 of Fluid Intelligence test. Asked to choose from 13, 14, 15, 16 or 17.
Molecular measures		30040_irnt	Mean corpuscular volume	continuous_irnt	162398			0.1105	0.1235	0.0111	0.0124	-0.781137	0.85573	0.9871	Result of "Mean Corpuscular Volume" assay, performed on blood sample, obtained from UK Biobank assessment centre visit. Mean Corpuscular Haemoglobin Concentration (pg) is the weight of hemoglobin in the average erythrocyte, computed by the formula: MCH = (hemoglobin/red blood cells) x 10.
icd10		R12	Diagnoses - main ICD10: R12 Heartburn	binary	167020	166732	288	-0.0803	0.0443	0.1416	0.0726	-0.783024	0.85573
icd10		G81	Diagnoses - main ICD10: G81 Hemiplegia	binary	167020	166866	154	-0.0253	-0.3049	0.2332	0.2723	0.779894	0.85573
icd10		J90	Diagnoses - main ICD10: J90 Pleural effusion, not elsewhere classified	binary	167020	166443	577	0.1137	0.007	0.0809	0.1108	0.777746	0.855922	*******************
Health and medical status	Mental	20126_5	Bipolar and major depression status: Single Probable major depression episode	binary	41187	39003	2184	0.0646	0.0246	0.0457	0.025	0.767884	0.856303	0.6598	Bipolar and major depression status. This derived data field has come from Professor Jill Pell from the Institute of Health &amp; Wellbeing, University of Glasgow. Methods on how these fields were derived can be found in the Additional Resources tab.
Physical measures		4195_irnt	Pulse wave reflection index	continuous_irnt	55515			0.0296	0.0346	0.0046	0.0046	-0.768594	0.856303	0.7675	reflection index is a measure of reflection A digital volume pulse can be considered to be the summation of a direct and a reflected component. The direct component is due to transmission of a pressure wave from the left ventricle to the finger via the most direct route. The reflected component is formed by pressure transmitted from the heart to the lower body where it is reflected back up the ao…
icd10		R17	Diagnoses - main ICD10: R17 Unspecified jaundice	binary	167020	166834	186	0.0333	0.3294	0.2254	0.3084	-0.775153	0.856303	*******************
icd10		A04	Diagnoses - main ICD10: A04 Other bacterial intestinal infections	binary	167020	166665	355	0.0728	-0.0574	0.1272	0.1111	0.770927	0.856303
icd10		T40	Diagnoses - main ICD10: T40 Poisoning by narcotics and psychodysleptics [hallucinogens]	binary	167020	166898	122	0.5108	0.2334	0.2938	0.2116	0.766155	0.856303	0.1142
icd10		R31	Diagnoses - main ICD10: R31 Unspecified haematuria	binary	167020	160601	6419	0.0426	0.0605	0.0129	0.0195	-0.765587	0.856303	0.5265
Health and medical status	Mental	20126_0	Bipolar and major depression status: No Bipolar or Depression	binary	41187	8936	32251	0.1152	0.0934	0.0235	0.0163	0.762247	0.857884	1.0573	Bipolar and major depression status. This derived data field has come from Professor Jill Pell from the Institute of Health &amp; Wellbeing, University of Glasgow. Methods on how these fields were derived can be found in the Additional Resources tab.
Health and medical status	Mental	1940	Irritability	binary	159979	110771	49208	0.1337	0.1227	0.0103	0.0104	0.751506	0.860513	0.9313	ACE touchscreen question "Are you an irritable person?" If the participant activated the Help button they were shown the message: Work through these questions quickly and do not think about the exact meaning of the question
Health and medical status	Mental	2020	Loneliness, isolation	binary	164569	140281	24288	0.0829	0.0753	0.0082	0.0059	0.752328	0.860513	0.919	ACE touchscreen question "Do you often feel lonely?" If the participant activated the Help button they were shown the message: Work through these questions quickly and do not think about the exact meaning of the question
Health and medical history	Mental	20421	Ever felt worried, tense, or anxious for most of a month or longer	binary	49483	38921	10562	0.0883	0.1062	0.0197	0.0132	-0.754844	0.860513	0.9516	Question asked: "Have you ever had a period lasting one month or longer when most of the time you felt worried, tense, or anxious?"
Physical measures		5118_irnt	6mm cylindrical power (left)	continuous_irnt	29265			0.0194	0.0267	0.0069	0.0068	-0.753539	0.860513	0.514	This is the cylindrical power of keratometry results taken at 6mm for the left eye (0 indicates none)
Molecular measures		30280_irnt	Immature reticulocyte fraction	continuous_irnt	159806			0.0633	0.0693	0.0054	0.0059	-0.750176	0.860513	0.9735	Result of "Immature Reticulocytes Fraction" assay, performed on blood sample, obtained from UK Biobank assessment centre visit. Immature Reticulocytes Fraction (Percentage) is an indication of new reticulocyte synthesis and is calculated from the reticulocytes (Percentage) as the total number of reticulocyte events in the outermost light scattering region, corresponding to immature reticulocytes,…
icd10		J31	Diagnoses - main ICD10: J31 Chronic rhinitis, nasopharyngitis and pharyngitis	binary	167020	166882	138	-0.1542	0.1159	0.2655	0.245	-0.747642	0.861182
Diagnosed disease	Mental	20544_6	Mental health problems ever diagnosed by a professional: Panic attacks	binary	51817	49764	2053	0.0994	0.0621	0.0443	0.0244	0.737516	0.867922		Question asked: "Have you been diagnosed with one or more of the following mental health problems by a professional, even if you don't have it currently? (tick all that apply):" Participant was offered a set of options which have been combined here into a single answer
icd10		L90	Diagnoses - main ICD10: L90 Atrophic disorders of skin	binary	167020	166506	514	0.111	0.0354	0.0968	0.0352	0.733971	0.867922	0.2775
icd10		T43	Diagnoses - main ICD10: T43 Poisoning by psychotropic drugs, not elsewhere classified	binary	167020	166741	279	0.1909	0.0561	0.1497	0.1064	0.733964	0.867922	0.3533
Cognitive functions		4276	Number of triplets attempted (right)	ordinal	54706			-0.0032	-0.0106	0.0077	0.0064	0.739077	0.867922		This is the number of triplet rounds attempted (0-15), for the right ear.
icd10		C90	Diagnoses - main ICD10: C90 Multiple myeloma and malignant plasma cell neoplasms	binary	167020	166781	239	0.0346	0.2697	0.1893	0.2634	-0.724796	0.876192	*******************
icd10		K14	Diagnoses - main ICD10: K14 Diseases of tongue	binary	167020	166644	376	0.057	-0.0601	0.1287	0.0984	0.722809	0.876238
Health and medical status		6151_7	Fractured bone site(s): Other bones	binary	165950	156882	9068	0.0273	0.0389	0.0118	0.0112	-0.713013	0.882257		ACE touchscreen question "Which bones did you fracture/break? (You can select more than one answer)" The following checks were performed: If code -1 was selected, then no additional choices were allowed. If code -3 was selected, then no additional choices were allowed. ~F6151~ was collected from participants who indicated they have had fractured/broken bones in the last 5 years, as defined by the…
Physical measures		5089_irnt	Astigmatism angle (left)	continuous_irnt	36295			0.0067	0.0128	0.0062	0.006	-0.707012	0.882257	1.0613	This is the astigmatism axial angle of refractometry results for the left eye (blank value indicates no cylinder power)
icd10		F33	Diagnoses - main ICD10: F33 Recurrent depressive disorder	binary	167020	166896	124	-0.023	0.2462	0.3007	0.2278	-0.713596	0.882257
icd10		M89	Diagnoses - main ICD10: M89 Other disorders of bone	binary	167020	166730	290	0.0635	-0.0627	0.1579	0.0809	0.711314	0.882257
icd10		J98	Diagnoses - main ICD10: J98 Other respiratory disorders	binary	167020	166721	299	0.0444	-0.0903	0.1377	0.1321	0.705906	0.882257
Cognitive functions		4924	Attempted fluid intelligence (FI) test.	binary	55058	737	54321	0.1229	0.0363	0.0925	0.0805	0.706227	0.882257		ACE touchscreen question "In this next game you will have two minutes to do as many puzzle questions as possible. Don't spend too long on any one puzzle - you can skip any puzzle if you wish.". Participants were offered the chance to skip the Fluid Intelligence test at this point.
Physical measures		5292	3mm index of best keratometry results (left)	ordinal	35098			0.0164	0.0058	0.0117	0.0103	0.680018	0.883323	-0.6022	zero-based index of most representative of keratometry results at 3mm for left eye
Health and medical status		6148_5	Eye problems/disorders: Macular degeneration	binary	54561	53458	1103	0.0881	0.0331	0.0613	0.0506	0.691944	0.883323	-0.1268	ACE touchscreen question "Has a doctor told you that you have any of the following problems with your eyes? (You can select more than one answer)" The following checks were performed: If code -7 was selected, then no additional choices were allowed. If code -3 was selected, then no additional choices were allowed. If code -1 was selected, then no additional choices were allowed. If the participan…
Health and medical status		6149_2	Mouth/teeth dental problems: Painful gums	binary	166385	162654	3731	0.0212	0.0371	0.0202	0.0117	-0.681125	0.883323		ACE touchscreen question "Do you have any of the following? (You can select more than one answer)" The following checks were performed: If code -7 was selected, then no additional choices were allowed. If code -3 was selected, then no additional choices were allowed. If the participant activated the Help button they were shown the message: Answer this question thinking about the past year.
Molecular measures		30060_irnt	Mean corpuscular haemoglobin concentration	continuous_irnt	162396			0.0252	0.028	0.0027	0.0031	-0.681106	0.883323	0.9747	Result of "Mean Corpuscular Haemoglobin Concentration" assay, performed on blood sample, obtained from UK Biobank assessment centre visit. Mean Corpuscular Haemoglobin Concentration (g/dL) is the average weight of haemoglobin in a measured dilution, computed by the formula: (haemoglobin/haematocrit) x 100.
icd10		K43	Diagnoses - main ICD10: K43 Ventral hernia	binary	167020	165904	1116	0.0636	0.1125	0.0491	0.0499	-0.698513	0.883323
icd10		R53	Diagnoses - main ICD10: R53 Malaise and fatigue	binary	167020	166658	362	0.2156	0.0832	0.1197	0.1475	0.696993	0.883323	*******************
icd10		Z30	Diagnoses - main ICD10: Z30 Contraceptive management	binary	167020	163313	3707	0.003	0.0264	0.0208	0.0264	-0.696231	0.883323	*******************
icd10		D33	Diagnoses - main ICD10: D33 Benign neoplasm of brain and other parts of central nervous system	binary	167020	166900	120	-0.2192	-0.5019	0.2947	0.2794	0.696144	0.883323
icd10		N32	Diagnoses - main ICD10: N32 Other disorders of bladder	binary	167020	164098	2922	0.0661	0.1048	0.0238	0.0505	-0.693209	0.883323	0.4975
icd10		M81	Diagnoses - main ICD10: M81 Osteoporosis without pathological fracture	binary	167020	166913	107	-0.0172	0.1885	0.2926	0.063	-0.687258	0.883323
icd10		G47	Diagnoses - main ICD10: G47 Sleep disorders	binary	167020	165031	1989	0.1483	0.2158	0.0383	0.0907	-0.685593	0.883323	0.4566
icd10		K81	Diagnoses - main ICD10: K81 Cholecystitis	binary	167020	166290	730	0.1204	0.0634	0.0724	0.0415	0.683038	0.883323	0.2212
icd10		H11	Diagnoses - main ICD10: H11 Other disorders of conjunctiva	binary	167020	166851	169	0.389	0.1847	0.2536	0.1591	0.68242	0.883323	0.0571
Health and medical status		6149_4	Mouth/teeth dental problems: Loose teeth	binary	166385	159238	7147	0.0723	0.0849	0.0134	0.0138	-0.655043	0.883809	0.9082	ACE touchscreen question "Do you have any of the following? (You can select more than one answer)" The following checks were performed: If code -7 was selected, then no additional choices were allowed. If code -3 was selected, then no additional choices were allowed. If the participant activated the Help button they were shown the message: Answer this question thinking about the past year.
Health and medical status	Mental	20500	Ever suffered mental distress preventing usual activities	binary	51177	37767	13410	0.0907	0.1048	0.0178	0.0119	-0.658526	0.883809	0.9696	Question asked: "In your life, have you suffered from a period of mental distress that prevented you from doing your usual activities?"
Physical measures		47_irnt	Hand grip strength (right)	continuous_irnt	166424			0.0666	0.0639	0.0028	0.0029	0.669788	0.883809	0.8668	Right grip strength
icd10		R41	Diagnoses - main ICD10: R41 Other symptoms and signs involving cognitive functions and awareness	binary	167020	166536	484	-0.0876	0.0183	0.0964	0.1238	-0.674928	0.883809
icd10		M84	Diagnoses - main ICD10: M84 Disorders of continuity of bone	binary	167020	166492	528	0.0713	-0.0123	0.0892	0.0865	0.672819	0.883809
icd10		S52	Diagnoses - main ICD10: S52 Fracture of forearm	binary	167020	165736	1284	0.0469	0.0781	0.0417	0.0211	-0.667603	0.883809	0.928
icd10		J32	Diagnoses - main ICD10: J32 Chronic sinusitis	binary	167020	166490	530	0.005	0.0813	0.0889	0.0724	-0.665495	0.883809	*******************
icd10		M47	Diagnoses - main ICD10: M47 Spondylosis	binary	167020	166212	808	0.0286	0.0848	0.0648	0.0542	-0.665255	0.883809
icd10		I80	Diagnoses - main ICD10: I80 Phlebitis and thrombophlebitis	binary	167020	165716	1304	0.251	0.1949	0.0564	0.0627	0.665211	0.883809	0.6598
icd10		E83	Diagnoses - main ICD10: E83 Disorders of mineral metabolism	binary	167020	166551	469	-0.0044	-0.1325	0.1041	0.1632	0.661761	0.883809
icd10		L43	Diagnoses - main ICD10: L43 Lichen planus	binary	167020	166902	118	-0.1224	0.1433	0.3748	0.1534	-0.656086	0.883809
icd10		K75	Diagnoses - main ICD10: K75 Other inflammatory liver diseases	binary	167020	166884	136	0.0262	-0.2049	0.2787	0.2158	0.655637	0.883809
icd10		T78	Diagnoses - main ICD10: T78 Adverse effects, not elsewhere classified	binary	167020	166748	272	0.2377	0.1088	0.161	0.113	0.65532	0.883809	-0.2909
icd10		I42	Diagnoses - main ICD10: I42 Cardiomyopathy	binary	167020	166711	309	0.1949	0.3852	0.134	0.2609	-0.648824	0.888637	0.3406
Cognitive functions		5779	FI11 : antonym	binary	6255	1856	4399	0.1327	0.2585	0.1237	0.1506	-0.645493	0.890218	0.9553	ACE touchscreen question "Relaxed means the opposite of?". Part 11 of Fluid Intelligence test. Offered choice from Calm, Anxious, Cool, Worried, Tense.
icd10		K08	Diagnoses - main ICD10: K08 Other disorders of teeth and supporting structures	binary	167020	166198	822	0.047	-0.0023	0.0557	0.0529	0.641782	0.890218
Cognitive functions		4269	Number of triplets attempted (left)	ordinal	54668			-0.0162	-0.0098	0.0071	0.007	-0.641896	0.890218		This is the number of triplet rounds attempted (0-15), for the left ear.
Physical measures		5251	6mm index of best keratometry results (right)	ordinal	29828			0.0294	0.0187	0.013	0.0117	0.611788	0.892606	0.0089	zero-based index of most representative of keratometry results at 6mm for right eye
Health and medical status	Mental	20126_4	Bipolar and major depression status: Probable Recurrent major depression (moderate)	binary	41187	37679	3508	0.0746	0.0501	0.0349	0.0195	0.612833	0.892606	1.1215	Bipolar and major depression status. This derived data field has come from Professor Jill Pell from the Institute of Health &amp; Wellbeing, University of Glasgow. Methods on how these fields were derived can be found in the Additional Resources tab.
icd10		H35	Diagnoses - main ICD10: H35 Other retinal disorders	binary	167020	166343	677	-0.1271	-0.0718	0.0713	0.051	-0.630829	0.892606
Cognitive functions		4233_irnt	Mean signal-to-noise ratio (SNR), (left)	continuous_irnt	54124			0.01	0.0065	0.0041	0.0037	0.63375	0.892606	1.075	This is the mean signal-to-noise ratio for rounds 8 onwards (left ear). The triplets played in rounds 1-5 represent the 'hunting phase' where the SNR change is 2 levels (equivalent to 4 dB) harder following a correct response and 2 levels easier following a wrong response, as opposed to a change of 1 level (2 dB) in rounds 8 to 15. Value is stored as -99999 for rounds 1-7.
icd10		M20	Diagnoses - main ICD10: M20 Acquired deformities of fingers and toes	binary	167020	165860	1160	0.0586	0.0897	0.0484	0.0097	-0.630034	0.892606	1.1379
icd10		D37	Diagnoses - main ICD10: D37 Neoplasm of uncertain or unknown behaviour of oral cavity and digestive organs	binary	167020	166627	393	-0.0209	0.0869	0.1085	0.1327	-0.6289	0.892606
Diagnosed disease	Mental	20544_10	Mental health problems ever diagnosed by a professional: Mania, hypomania, bipolar or manic-depression	binary	51811	51528	283	0.2082	0.0463	0.2034	0.1624	0.622024	0.892606	0.5151	Question asked: "Have you been diagnosed with one or more of the following mental health problems by a professional, even if you don't have it currently? (tick all that apply):" Participant was offered a set of options which have been combined here into a single answer
icd10		G57	Diagnoses - main ICD10: G57 Mononeuropathies of lower limb	binary	167020	166810	210	0.1827	0.0672	0.1803	0.0445	0.621936	0.892606	-0.3565
icd10		D70	Diagnoses - main ICD10: D70 Agranulocytosis	binary	167020	166715	305	-0.0146	0.0782	0.1381	0.0572	-0.62083	0.892606
icd10		I61	Diagnoses - main ICD10: I61 Intracerebral haemorrhage	binary	167020	166711	309	0.0359	0.1944	0.1328	0.2186	-0.619681	0.892606	0.9335
icd10		I20	Diagnoses - main ICD10: I20 Angina pectoris	binary	167020	163076	3944	0.1207	0.1493	0.0231	0.04	-0.619168	0.892606	0.9466
icd10		M67	Diagnoses - main ICD10: M67 Other disorders of synovium and tendon	binary	167020	166082	938	0.0994	0.0602	0.054	0.0331	0.618909	0.892606	0.4119
icd10		S83	Diagnoses - main ICD10: S83 Dislocation, sprain and strain of joints and ligaments of knee	binary	167020	166648	372	0.2526	0.1122	0.1209	0.1928	0.61695	0.892606	-0.5553
icd10		M77	Diagnoses - main ICD10: M77 Other enthesopathies	binary	167020	166636	384	0.0823	0.0013	0.1153	0.0638	0.614686	0.892606	*******************
icd10		M54	Diagnoses - main ICD10: M54 Dorsalgia	binary	167020	163560	3460	0.1293	0.1081	0.03	0.0171	0.613936	0.892606	0.7567
Cognitive functions		5699	FI10 : arithmetic sequence recognition	binary	10804	1575	9229	0.313	0.2366	0.1029	0.0751	0.599729	0.899545	1.1143	ACE touchscreen question "150 ... 137 ... 125 ... 114 ... 104 ... What comes next?". Part 10 of Fluid Intelligence test. Offered choice from 92, 93, 94, 95 or 96.
Health and medical status		6150_3	Vascular/heart problems diagnosed by doctor: Stroke	binary	166663	163307	3356	0.0597	0.0366	0.0205	0.0325	0.601167	0.899545	0.7791	ACE touchscreen question "Has a doctor ever told you that you have had any of the following conditions? (You can select more than one answer)" The following checks were performed: If code -7 was selected, then no additional choices were allowed. If code -3 was selected, then no additional choices were allowed. If the participant activated the Help button they were shown the message: If you do not…
Diagnosed disease	Mental	20544_5	Mental health problems ever diagnosed by a professional: Any other phobia (eg disabling fear of heights or spiders)	binary	51810	51305	505	-0.0405	0.0455	0.1297	0.0591	-0.60338	0.899545		Question asked: "Have you been diagnosed with one or more of the following mental health problems by a professional, even if you don't have it currently? (tick all that apply):" Participant was offered a set of options which have been combined here into a single answer
icd10		D17	Diagnoses - main ICD10: D17 Benign lipomatous neoplasm	binary	167020	164907	2113	0.0643	0.0382	0.0262	0.0349	0.598075	0.899545	0.3432
Physical measures		5099_irnt	3mm weak meridian (right)	continuous_irnt	35174			0.1767	0.1871	0.0124	0.0124	-0.593057	0.901008	0.9711	This is the weak meridian of keratometry results taken at 3mm for the right eye
icd10		C44	Diagnoses - main ICD10: C44 Other malignant neoplasms of skin	binary	167020	162223	4797	0.1341	0.1585	0.0279	0.0301	-0.594517	0.901008	0.9357
icd10		R07	Diagnoses - main ICD10: R07 Pain in throat and chest	binary	167020	154637	12383	0.085	0.0763	0.0105	0.0106	0.583105	0.909867	0.9625
Molecular measures		30050_irnt	Mean corpuscular haemoglobin	continuous_irnt	162398			0.1085	0.1182	0.0114	0.0123	-0.578396	0.913001	0.9882	Result of "Mean Corpuscular Haemoglobin" assay, performed on blood sample, obtained from UK Biobank assessment centre visit.
Molecular measures		30500_irnt	Microalbumin in urine	continuous_irnt	56767			0.0196	0.0157	0.0046	0.005	0.574026	0.913748	0.8407	Measured by immunoturbidimetric analysis on a Beckman Coulter AU5400.
Non-cancer illness code, self-reported		20002_1465	Non-cancer illness code, self-reported: osteoarthritis	binary	166988	156339	10649	0.0559	0.0636	0.0117	0.0065	-0.5753	0.913748	0.9316	Code for non-cancer illness. If the participant was uncertain of the type of illness they had had, then they described it to the interviewer (a trained nurse) who attempted to place it within the coding tree. If the illness could not be located in the coding tree then the interviewer entered a free-text description of it. These free-text descriptions were subsequently examined by a doctor and, wh…
Early life factors		1697	Comparative height size at age 10	ordinal	164555			0.2246	0.2332	0.0108	0.0111	-0.555301	0.92444	0.982	ACE touchscreen question "When you were 10 years old, compared to average would you describe yourself as:"
Health and medical status		6151_6	Fractured bone site(s): Arm	binary	165950	164585	1365	0.1187	0.0896	0.044	0.0296	0.548748	0.92444	0.2955	ACE touchscreen question "Which bones did you fracture/break? (You can select more than one answer)" The following checks were performed: If code -1 was selected, then no additional choices were allowed. If code -3 was selected, then no additional choices were allowed. ~F6151~ was collected from participants who indicated they have had fractured/broken bones in the last 5 years, as defined by the…
Health and medical status		6151_3	Fractured bone site(s): Hip	binary	165950	165656	294	0.0616	-0.0482	0.1528	0.1241	0.557794	0.92444		ACE touchscreen question "Which bones did you fracture/break? (You can select more than one answer)" The following checks were performed: If code -1 was selected, then no additional choices were allowed. If code -3 was selected, then no additional choices were allowed. ~F6151~ was collected from participants who indicated they have had fractured/broken bones in the last 5 years, as defined by the…
icd10		R32	Diagnoses - main ICD10: R32 Unspecified urinary incontinence	binary	167020	166842	178	0.2147	0.0917	0.2121	0.0587	0.558906	0.92444	0.81
icd10		S09	Diagnoses - main ICD10: S09 Other and unspecified injuries of head	binary	167020	166199	821	0.1653	0.2341	0.0637	0.1056	-0.557876	0.92444	0.429
Life style		20406	Ever addicted to alcohol	binary	3406	1803	1603	0.2357	0.0625	0.2204	0.2347	0.53795	0.92444		Question asked: "Have you been addicted to alcohol?" Question was asked when ~F20401~ was Yes.
Health and medical status	Mental	20431	Ever addicted to a behaviour or miscellanous	binary	3616	2552	1064	0.0156	0.2136	0.1891	0.3103	-0.544884	0.92444	*******************	Question asked: "Have you been addicted to a behaviour (such as gambling) or to anything else we have not mentioned?" Question was asked when ~F20401~ was Yes.
Health and medical status	Mental	20456	Ever addicted to illicit or recreational drugs	binary	3619	3284	335	0.2018	-0.1815	0.3554	0.6159	0.539035	0.92444		Question asked: "Have you been addicted to Illicit or recreational drugs?" Question was asked when ~F20401~ was Yes.
icd10		M24	Diagnoses - main ICD10: M24 Other specific joint derangements	binary	167020	166391	629	0.0687	0.0084	0.0785	0.0764	0.550479	0.92444	*******************
icd10		K21	Diagnoses - main ICD10: K21 Gastro-oesophageal reflux disease	binary	167020	162098	4922	0.0493	0.0614	0.0161	0.0153	-0.544791	0.92444
icd10		K85	Diagnoses - main ICD10: K85 Acute pancreatitis	binary	167020	166372	648	0.0473	0.1081	0.0779	0.08	-0.5445	0.92444
Cancer code, sef-reported		20001_1059	Cancer code, self-reported: malignant melanoma	binary	166988	165806	1182	0.0314	0.0635	0.0467	0.0363	-0.542699	0.92444		Code for cancer. If the participant was uncertain of the type of cancer they had had, then they described it to the interviewer (a trained nurse) who attempted to place it within the coding tree. If the cancer could not be located in the coding tree then the interviewer entered a free-text description of it. These free-text descriptions were subsequently examined by a doctor and, where possible, …
Cancer code, sef-reported		20001_1003	Cancer code, self-reported: skin cancer	binary	166988	166426	562	0.0212	0.0858	0.0836	0.0848	-0.542493	0.92444	-0.4713	Code for cancer. If the participant was uncertain of the type of cancer they had had, then they described it to the interviewer (a trained nurse) who attempted to place it within the coding tree. If the cancer could not be located in the coding tree then the interviewer entered a free-text description of it. These free-text descriptions were subsequently examined by a doctor and, where possible, …
icd10		Z85	Diagnoses - main ICD10: Z85 Personal history of malignant neoplasm	binary	167020	166903	117	0.3829	0.1475	0.3328	0.284	0.538049	0.92444	-0.6007
icd10		H60	Diagnoses - main ICD10: H60 Otitis externa	binary	167020	166880	140	0.1627	-0.0265	0.2664	0.2309	0.536678	0.92444
Health and medical status	Mental	1920	Mood swings	binary	162893	93320	69573	0.1139	0.1088	0.0085	0.0061	0.487464	0.924962	0.9709	ACE touchscreen question "Does your mood often go up and down?" If the participant activated the Help button they were shown the message: Work through these questions quickly and do not think about the exact meaning of the question
Health and medical status	Mental	1990	Tense / 'highly strung'	binary	162404	138030	24374	0.1278	0.1209	0.0106	0.0084	0.510174	0.924962	0.9307	ACE touchscreen question "Would you call yourself tense or 'highly strung'?" If the participant activated the Help button they were shown the message: Work through these questions quickly and do not think about the exact meaning of the question
Health and medical status		6149_3	Mouth/teeth dental problems: Bleeding gums	binary	166385	148664	17721	0.0462	0.0508	0.0076	0.0053	-0.496464	0.924962	1.1284	ACE touchscreen question "Do you have any of the following? (You can select more than one answer)" The following checks were performed: If code -7 was selected, then no additional choices were allowed. If code -3 was selected, then no additional choices were allowed. If the participant activated the Help button they were shown the message: Answer this question thinking about the past year.
icd10		J06	Diagnoses - main ICD10: J06 Acute upper respiratory infections of multiple and unspecified sites	binary	167020	166874	146	0.0441	0.2012	0.2434	0.1651	-0.534151	0.924962	*******************
Health and medical status	Mental	20126_1	Bipolar and major depression status: Bipolar I Disorder	binary	41187	40905	282	0.1833	0.3282	0.2007	0.209	-0.500067	0.924962	0.471	Bipolar and major depression status. This derived data field has come from Professor Jill Pell from the Institute of Health &amp; Wellbeing, University of Glasgow. Methods on how these fields were derived can be found in the Additional Resources tab.
Life style		20160	Ever smoked	binary	166343	57091	109252	0.1237	0.1287	0.0072	0.0066	-0.511913	0.924962	0.8677	Derived using variables "Current tobacco smoking" (~F1239~) and "Past tobacco smoking" (~F1249~). Individual classed as Eversmoker if Current tobacco smoking= most days (1) or occasionally (2) OR Past tobacco smoking= most days (1) or occasionally (2) or tried once or twice (3). Individual were classed as Neversmoker if Current tobacco smoking= no (0) AND Past tobacco smoking= never (4). Individu…
Health and medical status	Mental	20441	Ever had prolonged loss of interest in normal activities	binary	51829	35399	16430	0.0957	0.106	0.0167	0.0114	-0.509396	0.924962	1.0039	Question asked: "Have you ever had a time in your life lasting two weeks or more when you lost interest in most things like hobbies, work, or activities that usually give you pleasure?"
Health and medical status	Mental	20466	Ever prescribed a medication for unusual or psychotic experiences	binary	2306	2009	297	0.3993	0.0703	0.4804	0.4518	0.498882	0.924962	*******************	Question asked: "Were you ever prescribed a medication by a health professional for any of these experiences (seeing a vision, hearing a voice, or believing that something strange was trying to communicate with you, or there was a plot against you)?" Question was asked when ~F20471~ was Yes or ~F20463~ was Yes or ~F20474~ was Yes or ~F20468~ was Yes.
Health and medical status		40001_C349	Underlying (primary) cause of death: ICD10: C34.9 Bronchus or lung, unspecified	binary	5588	4975	613	0.1927	0.3892	0.2248	0.3251	-0.49715	0.924962	1.1732	Underlying/primary cause of death reported for participant. Note that this may not match the text value in ~F40010~ due to transcription errors at source. Acquired from central registry.
Physical measures		12336_irnt	Ventricular rate	continuous_irnt	5275			0.0993	0.128	0.0416	0.0405	-0.494327	0.924962	0.5991	Ventricular rate during ECG measurement.
icd10		S01	Diagnoses - main ICD10: S01 Open wound of head	binary	167020	165940	1080	0.1216	0.0669	0.051	0.0896	0.530564	0.924962	0.6117
icd10		D41	Diagnoses - main ICD10: D41 Neoplasm of uncertain or unknown behaviour of urinary organs	binary	167020	166647	373	0.0041	-0.1695	0.1109	0.3096	0.527879	0.924962
icd10		L72	Diagnoses - main ICD10: L72 Follicular cysts of skin and subcutaneous tissue	binary	167020	163829	3191	0.078	0.0574	0.0268	0.0284	0.527547	0.924962	0.3368
icd10		L82	Diagnoses - main ICD10: L82 Seborrhoeic keratosis	binary	167020	166132	888	-0.0183	0.0213	0.0598	0.0464	-0.523186	0.924962
icd10		N13	Diagnoses - main ICD10: N13 Obstructive and reflux uropathy	binary	167020	166181	839	0.0123	0.0735	0.0614	0.0997	-0.522675	0.924962	*******************
icd10		D18	Diagnoses - main ICD10: D18 Haemangioma and lymphangioma, any site	binary	167020	166604	416	0.0765	0.0065	0.1081	0.081	0.518211	0.924962	*******************
icd10		D10	Diagnoses - main ICD10: D10 Benign neoplasm of mouth and pharynx	binary	167020	166838	182	0.159	0.011	0.1964	0.2089	0.516171	0.924962	*******************
icd10		M75	Diagnoses - main ICD10: M75 Shoulder lesions	binary	167020	163748	3272	0.0875	0.0716	0.0248	0.0187	0.511911	0.924962
icd10		K12	Diagnoses - main ICD10: K12 Stomatitis and related lesions	binary	167020	166896	124	-0.0188	-0.2057	0.292	0.2198	0.511382	0.924962
icd10		K01	Diagnoses - main ICD10: K01 Embedded and impacted teeth	binary	167020	166406	614	-0.0522	-0.0018	0.0735	0.066	-0.510205	0.924962
icd10		S02	Diagnoses - main ICD10: S02 Fracture of skull and facial bones	binary	167020	166138	882	0.0603	-0.0069	0.061	0.1184	0.504543	0.924962
icd10		M48	Diagnoses - main ICD10: M48 Other spondylopathies	binary	167020	166101	919	0.1259	0.0819	0.0641	0.0592	0.504269	0.924962
icd10		C20	Diagnoses - main ICD10: C20 Malignant neoplasm of rectum	binary	167020	166319	701	-0.0073	-0.0798	0.067	0.1273	0.503979	0.924962
icd10		R20	Diagnoses - main ICD10: R20 Disturbances of skin sensation	binary	167020	166611	409	-0.0199	0.0529	0.1111	0.0974	-0.492725	0.924962
Cancer code, sef-reported		20001_1061	Cancer code, self-reported: basal cell carcinoma	binary	166988	165587	1401	0.1523	0.1249	0.0459	0.0316	0.491693	0.924962		Code for cancer. If the participant was uncertain of the type of cancer they had had, then they described it to the interviewer (a trained nurse) who attempted to place it within the coding tree. If the cancer could not be located in the coding tree then the interviewer entered a free-text description of it. These free-text descriptions were subsequently examined by a doctor and, where possible, …
icd10		C80	Diagnoses - main ICD10: C80 Malignant neoplasm without specification of site	binary	167020	166847	173	-0.0116	0.1266	0.2055	0.1944	-0.488545	0.924962
icd10		L08	Diagnoses - main ICD10: L08 Other local infections of skin and subcutaneous tissue	binary	167020	166769	251	0.2488	0.3752	0.1558	0.2068	-0.488181	0.924962	-0.5468
icd10		H65	Diagnoses - main ICD10: H65 Nonsuppurative otitis media	binary	167020	166616	404	0.1653	0.0816	0.1266	0.1169	0.485733	0.924962	0.8888
icd10		G62	Diagnoses - main ICD10: G62 Other polyneuropathies	binary	167020	166832	188	0.1057	0.3096	0.1881	0.3782	-0.482724	0.926246
icd10		N31	Diagnoses - main ICD10: N31 Neuromuscular dysfunction of bladder, not elsewhere classified	binary	167020	166579	441	0.056	-0.0048	0.0989	0.0791	0.480096	0.927133
icd10		E16	Diagnoses - main ICD10: E16 Other disorders of pancreatic internal secretion	binary	167020	166825	195	-0.1208	0.0795	0.1913	0.3765	-0.474293	0.930925
icd10		D36	Diagnoses - main ICD10: D36 Benign neoplasm of other and unspecified sites	binary	167020	166801	219	-0.0548	0.0523	0.1778	0.1405	-0.472614	0.930925
Physical measures		5088_irnt	Astigmatism angle (right)	continuous_irnt	36406			0.0139	0.0178	0.0058	0.0063	-0.455432	0.930925	0.2206	This is the astigmatism axial angle of refractometry results for the right eye (blank value indicates no cylinder power)
Diagnosed disease	Mental	20544_11	Mental health problems ever diagnosed by a professional: Depression	binary	51841	43675	8166	0.0879	0.0991	0.0209	0.0119	-0.465689	0.930925	0.9123	Question asked: "Have you been diagnosed with one or more of the following mental health problems by a professional, even if you don't have it currently? (tick all that apply):" Participant was offered a set of options which have been combined here into a single answer
icd10		R26	Diagnoses - main ICD10: R26 Abnormalities of gait and mobility	binary	167020	166855	165	0.0293	0.1876	0.2462	0.2361	-0.46407	0.930925	*******************
icd10		R30	Diagnoses - main ICD10: R30 Pain associated with micturition	binary	167020	166823	197	0.1905	0.0496	0.1785	0.2459	0.463705	0.930925	*******************
Cancer code, sef-reported		20001_1020	Cancer code, self-reported: large bowel cancer/colorectal cancer	binary	166988	166700	288	-0.0677	0.0453	0.1545	0.1896	-0.46202	0.930925		Code for cancer. If the participant was uncertain of the type of cancer they had had, then they described it to the interviewer (a trained nurse) who attempted to place it within the coding tree. If the cancer could not be located in the coding tree then the interviewer entered a free-text description of it. These free-text descriptions were subsequently examined by a doctor and, where possible, …
icd10		K41	Diagnoses - main ICD10: K41 Femoral hernia	binary	167020	166907	113	-0.0012	0.1568	0.3252	0.1066	-0.461683	0.930925
icd10		C92	Diagnoses - main ICD10: C92 Myeloid leukaemia	binary	167020	166836	184	0.1989	0.0322	0.2221	0.2869	0.459454	0.930925	*******************
icd10		R91	Diagnoses - main ICD10: R91 Abnormal findings on diagnostic imaging of lung	binary	167020	166417	603	0.0328	0.0867	0.0823	0.0848	-0.45612	0.930925
icd10		T82	Diagnoses - main ICD10: T82 Complications of cardiac and vascular prosthetic devices, implants and grafts	binary	167020	166239	781	-0.1022	-0.0262	0.0704	0.1514	-0.455179	0.930925
Health and medical status		2060	Frequency of unenthusiasm / disinterest in last 2 weeks	ordinal	161907			0.0421	0.0398	0.0038	0.0033	0.456994	0.930925	0.8724	ACE touchscreen question "Over the past two weeks, how often have you had little interest or pleasure in doing things?" If the participant activated the Help button they were shown the message: Answer this question thinking about the past 2 weeks. If you are unsure, please provide an estimate or select Do not know.
icd10		M43	Diagnoses - main ICD10: M43 Other deforming dorsopathies	binary	167020	166796	224	0.0443	0.1406	0.1893	0.0985	-0.451279	0.933127	*******************
Diagnosed disease	Mental	20544_1	Mental health problems ever diagnosed by a professional: Social anxiety or social phobia	binary	51814	51129	685	0.1711	0.1185	0.0917	0.0733	0.448057	0.934628	0.8715	Question asked: "Have you been diagnosed with one or more of the following mental health problems by a professional, even if you don't have it currently? (tick all that apply):" Participant was offered a set of options which have been combined here into a single answer
Cognitive functions		4230_irnt	Signal-to-noise-ratio (SNR) of triplet (left)	continuous_irnt	54183			0.0146	0.0122	0.0039	0.0039	0.435143	0.944518	0.767	This is the signal-to-noise ratio for each round (left ear)
icd10		N23	Diagnoses - main ICD10: N23 Unspecified renal colic	binary	167020	166033	987	0.0308	-0.0282	0.0559	0.1236	0.434933	0.944518
Health and medical status	Mental	1970	Nervous feelings	binary	163459	131485	31974	0.1191	0.1247	0.0106	0.0076	-0.429349	0.94746	0.904	ACE touchscreen question "Would you call yourself a nervous person?" If the participant activated the Help button they were shown the message: Work through these questions quickly and do not think about the exact meaning of the question
Cancer code, sef-reported		20001_99999	Cancer code, self-reported: unclassifiable	binary	166988	166869	119	0.316	0.1783	0.2798	0.158	0.428533	0.94746	0.1396	Code for cancer. If the participant was uncertain of the type of cancer they had had, then they described it to the interviewer (a trained nurse) who attempted to place it within the coding tree. If the cancer could not be located in the coding tree then the interviewer entered a free-text description of it. These free-text descriptions were subsequently examined by a doctor and, where possible, …
icd10		D03	Diagnoses - main ICD10: D03 Melanoma in situ	binary	167020	166747	273	0.0413	-0.0414	0.1458	0.1291	0.424664	0.947902
Diagnosed disease	Mental	20544_17	Mental health problems ever diagnosed by a professional: Agoraphobia	binary	51810	51703	107	0.1058	-0.0699	0.3957	0.1212	0.424555	0.947902		Question asked: "Have you been diagnosed with one or more of the following mental health problems by a professional, even if you don't have it currently? (tick all that apply):" Participant was offered a set of options which have been combined here into a single answer
icd10		M79	Diagnoses - main ICD10: M79 Other soft tissue disorders, not elsewhere classified	binary	167020	164077	2943	0.023	0.0362	0.0245	0.0198	-0.419039	0.951755
Physical measures		5276	Index of best refractometry result (left)	ordinal	36295			-0.0078	-0.0029	0.0116	0.0093	-0.329572	0.956862		zero-based index of most representative refractometry result for left eye
Life styles		1707_2	Handedness (chirality/laterality): Left-handed	binary	166874	149135	17739	0.0365	0.0404	0.0083	0.0074	-0.350726	0.956862	0.6617	ACE touchscreen question "Are you right or left handed?"
Health and medical status	Mental	1950	Sensitivity / hurt feelings	binary	161904	88838	73066	0.1089	0.1127	0.0083	0.0071	-0.347907	0.956862	0.8378	ACE touchscreen question "Are your feelings easily hurt?" If the participant activated the Help button they were shown the message: Work through these questions quickly and do not think about the exact meaning of the question
Health and medical status	Mental	1960	Fed-up feelings	binary	163602	101558	62044	0.1115	0.1149	0.0078	0.0066	-0.332758	0.956862	0.9631	ACE touchscreen question "Do you often feel 'fed-up'?" If the participant activated the Help button they were shown the message: Work through these questions quickly and do not think about the exact meaning of the question
Health and medical status		2188	Long-standing illness, disability or infirmity	binary	163527	105303	58224	0.0933	0.0962	0.006	0.0061	-0.338932	0.956862	0.8933	ACE touchscreen question "Do you have any long-standing illness, disability or infirmity?"
Cognitive functions		5001	FI7 : synonym	binary	38942	5132	33810	0.1431	0.1575	0.0303	0.0306	-0.334391	0.956862	0.8346	ACE touchscreen question "Stop means the same as?". Part 7 of Fluid Intelligence test. Offered choice from Pause, Close, Cease, Break or Rest.
Health and medical status		6148_2	Eye problems/disorders: Glaucoma	binary	54561	51836	2725	0.1766	0.1997	0.0443	0.046	-0.361711	0.956862		ACE touchscreen question "Has a doctor told you that you have any of the following problems with your eyes? (You can select more than one answer)" The following checks were performed: If code -7 was selected, then no additional choices were allowed. If code -3 was selected, then no additional choices were allowed. If code -1 was selected, then no additional choices were allowed. If the participan…
Health and medical status		6149_100	Mouth/teeth dental problems: None of the above	binary	166385	63326	103059	0.0625	0.0651	0.0057	0.0044	-0.361076	0.956862	0.9838	ACE touchscreen question "Do you have any of the following? (You can select more than one answer)" The following checks were performed: If code -7 was selected, then no additional choices were allowed. If code -3 was selected, then no additional choices were allowed. If the participant activated the Help button they were shown the message: Answer this question thinking about the past year.
Health and medical status		6149_5	Mouth/teeth dental problems: Toothache	binary	166385	158907	7478	0.0349	0.0425	0.0133	0.015	-0.379105	0.956862	1.0425	ACE touchscreen question "Do you have any of the following? (You can select more than one answer)" The following checks were performed: If code -7 was selected, then no additional choices were allowed. If code -3 was selected, then no additional choices were allowed. If the participant activated the Help button they were shown the message: Answer this question thinking about the past year.
Health and medical status		6151_2	Fractured bone site(s): Leg	binary	165950	164792	1158	0.078	0.0514	0.059	0.0494	0.345677	0.956862	0.5492	ACE touchscreen question "Which bones did you fracture/break? (You can select more than one answer)" The following checks were performed: If code -1 was selected, then no additional choices were allowed. If code -3 was selected, then no additional choices were allowed. ~F6151~ was collected from participants who indicated they have had fractured/broken bones in the last 5 years, as defined by the…
Health and medical status		6151_4	Fractured bone site(s): Spine	binary	165950	165586	364	0.1501	0.0928	0.1201	0.0976	0.370258	0.956862	0.1494	ACE touchscreen question "Which bones did you fracture/break? (You can select more than one answer)" The following checks were performed: If code -1 was selected, then no additional choices were allowed. If code -3 was selected, then no additional choices were allowed. ~F6151~ was collected from participants who indicated they have had fractured/broken bones in the last 5 years, as defined by the…
Health and medical status		6152_6	Blood clot, DVT, bronchitis, emphysema, asthma, rhinitis, eczema, allergy diagnosed by doctor: Emphysema/chronic bronchitis	binary	166695	163529	3166	0.1392	0.1233	0.0243	0.0313	0.401257	0.956862	1.0213	ACE touchscreen question "Has a doctor ever told you that you have had any of the following conditions? (You can select more than one answer)" The following checks were performed: If code -7 was selected, then no additional choices were allowed. If code -3 was selected, then no additional choices were allowed. If the participant activated the Help button they were shown the message: If you do not…
Health and medical status	Mental	20122	Bipolar disorder status	binary	557	275	282	0.6514	1.3953	1.2628	1.4677	-0.384209	0.956862	*******************	This derived data field has come from Professor Jill Pell from the Institute of Health &amp; Wellbeing, University of Glasgow. Methods on how these fields were derived can be found in the Additional Resources tab.
Health and medical status	Mental	20471	Ever seen an un-real vision	binary	51392	49995	1397	0.0537	0.085	0.0798	0.0348	-0.359531	0.956862	0.8385	Question asked: "Did you ever see something that wasn't really there that other people could not see?"
icd10		R42	Diagnoses - main ICD10: R42 Dizziness and giddiness	binary	167020	166131	889	-0.0183	0.018	0.0565	0.0677	-0.411663	0.956862
Cognitive functions		4244_irnt	Mean signal-to-noise ratio (SNR), (right)	continuous_irnt	54146			0.007	0.0091	0.004	0.0041	-0.36662	0.956862	0.5563	This is the mean signal-to-noise ratio for rounds 8 onwards (right ear). The triplets played in rounds 1-5 represent the 'hunting phase' where the SNR change is 2 levels (equivalent to 4 dB) harder following a correct response and 2 levels easier following a wrong response, as opposed to a change of 1 level (2 dB) in rounds 8 to 15. Value is stored as -99999 for rounds 1-7.
Physical measures		5086_irnt	Cylindrical power (left)	continuous_irnt	36295			0.0153	0.0121	0.0063	0.0059	0.370742	0.956862	1.0679	This is the cylindrical power of refractometry results for the left eye (0.00 indicates none)
Physical measures		5160_irnt	3mm regularity index (right)	continuous_irnt	34304			0.0233	0.02	0.0072	0.0065	0.340206	0.956862	1.1099	This is the regularity index as part of the keratometry result taken at 3mm for the right eye
Physical measures		5162_irnt	6mm regularity index (left)	continuous_irnt	16376			0.018	0.0232	0.0111	0.0116	-0.323882	0.956862	0.8877	This is the regularity index as part of the keratometry result taken at 6mm for the left eye
Physical measures		21021_irnt	Pulse wave Arterial Stiffness index	continuous_irnt	55324			0.0213	0.0234	0.0039	0.0044	-0.357166	0.956862	0.8314	The time between peaks of the waveform (the peak-to-peak time) is divided into the persons height to obtain the Stiffness Index. This value was calculated outside the Assessment Centre visit as the participant height was not known until after the stiffness device had been used.
icd10		D04	Diagnoses - main ICD10: D04 Carcinoma in situ of skin	binary	167020	166825	195	-0.0944	0.0194	0.2039	0.2022	-0.396297	0.956862
icd10		S63	Diagnoses - main ICD10: S63 Dislocation, sprain and strain of joints and ligaments at wrist and hand level	binary	167020	166785	235	-0.0021	-0.1173	0.1676	0.2433	0.389927	0.956862
icd10		C77	Diagnoses - main ICD10: C77 Secondary and unspecified malignant neoplasm of lymph nodes	binary	167020	166770	250	0.0267	0.0971	0.1482	0.1073	-0.384771	0.956862	*******************
icd10		F32	Diagnoses - main ICD10: F32 Depressive episode	binary	167020	166649	371	0.0452	0.104	0.1103	0.1061	-0.384196	0.956862
icd10		R29	Diagnoses - main ICD10: R29 Other symptoms and signs involving the nervous and musculoskeletal systems	binary	167020	166591	429	0.0767	0.1321	0.0981	0.1069	-0.381831	0.956862	0.0986
icd10		S66	Diagnoses - main ICD10: S66 Injury of muscle and tendon at wrist and hand level	binary	167020	166458	562	0.1402	0.2194	0.0831	0.1913	-0.379729	0.956862	0.3851
icd10		M21	Diagnoses - main ICD10: M21 Other acquired deformities of limbs	binary	167020	166777	243	0.0974	0.0148	0.1831	0.1175	0.379667	0.956862	*******************
icd10		J44	Diagnoses - main ICD10: J44 Other chronic obstructive pulmonary disease	binary	167020	166179	841	0.214	0.2534	0.0676	0.0789	-0.379215	0.956862	0.8571
icd10		J45	Diagnoses - main ICD10: J45 Asthma	binary	167020	166399	621	0.1342	0.0997	0.0782	0.0467	0.378775	0.956862	0.6177
icd10		N20	Diagnoses - main ICD10: N20 Calculus of kidney and ureter	binary	167020	164488	2532	0.1795	0.1525	0.0313	0.0642	0.378026	0.956862
icd10		I65	Diagnoses - main ICD10: I65 Occlusion and stenosis of precerebral arteries, not resulting in cerebral infarction	binary	167020	166692	328	0.0893	-0.0421	0.1398	0.319	0.377273	0.956862
icd10		J33	Diagnoses - main ICD10: J33 Nasal polyp	binary	167020	165541	1479	0.1543	0.1901	0.0468	0.0828	-0.376403	0.956862	0.6411
icd10		C64	Diagnoses - main ICD10: C64 Malignant neoplasm of kidney, except renal pelvis	binary	167020	166557	463	0.0673	0.1509	0.0946	0.2013	-0.375865	0.956862	0.1887
icd10		F43	Diagnoses - main ICD10: F43 Reaction to severe stress, and adjustment disorders	binary	167020	166912	108	0.1354	-0.029	0.3277	0.2937	0.373591	0.956862
icd10		Z43	Diagnoses - main ICD10: Z43 Attention to artificial openings	binary	167020	166222	798	0.0359	-0.0072	0.0635	0.0967	0.372562	0.956862
icd10		H43	Diagnoses - main ICD10: H43 Disorders of vitreous body	binary	167020	166789	231	-0.0602	0.0355	0.1692	0.1943	-0.371441	0.956862
icd10		H18	Diagnoses - main ICD10: H18 Other disorders of cornea	binary	167020	166880	140	-0.2431	-0.1139	0.2291	0.266	-0.368029	0.956862
icd10		H91	Diagnoses - main ICD10: H91 Other hearing loss	binary	167020	166828	192	0.0927	-0.0024	0.1802	0.1861	0.367115	0.956862
icd10		D75	Diagnoses - main ICD10: D75 Other diseases of blood and blood-forming organs	binary	167020	166844	176	-0.3592	-0.2209	0.2122	0.3134	-0.365407	0.956862
Diagnosed disease	Mental	20544_15	Mental health problems ever diagnosed by a professional: Anxiety, nerves or generalized anxiety disorder	binary	51825	46176	5649	0.0831	0.0725	0.0249	0.0152	0.363353	0.956862	1.042	Question asked: "Have you been diagnosed with one or more of the following mental health problems by a professional, even if you don't have it currently? (tick all that apply):" Participant was offered a set of options which have been combined here into a single answer
icd10		Z47	Diagnoses - main ICD10: Z47 Other orthopaedic follow-up care	binary	167020	165843	1177	0.0598	0.0816	0.0483	0.0368	-0.359015	0.956862	0.5581
icd10		L03	Diagnoses - main ICD10: L03 Cellulitis	binary	167020	164453	2567	0.0638	0.0835	0.0331	0.0451	-0.352144	0.956862
icd10		G45	Diagnoses - main ICD10: G45 Transient cerebral ischaemic attacks and related syndromes	binary	167020	165982	1038	0.0139	0.0453	0.0477	0.0803	-0.336192	0.956862
icd10		M76	Diagnoses - main ICD10: M76 Enthesopathies of lower limb, excluding foot	binary	167020	166881	139	0.2128	0.0841	0.2754	0.2744	0.331046	0.956862	*******************
icd10		T81	Diagnoses - main ICD10: T81 Complications of procedures, not elsewhere classified	binary	167020	164519	2501	0.0177	0.0287	0.0252	0.022	-0.328829	0.956862
icd10		M50	Diagnoses - main ICD10: M50 Cervical disk disorders	binary	167020	166557	463	0.0958	0.0479	0.0962	0.1104	0.327112	0.956862	0.4792
icd10		Z00	Diagnoses - main ICD10: Z00 General examination and investigation of persons without complaint or reported diagnosis	binary	167020	166900	120	-0.1911	-0.3396	0.3391	0.3064	0.324929	0.956862
icd10		M23	Diagnoses - main ICD10: M23 Internal derangement of knee	binary	167020	160196	6824	0.0707	0.079	0.018	0.0183	-0.323349	0.956862
icd10		I10	Diagnoses - main ICD10: I10 Essential (primary) hypertension	binary	167020	166650	370	0.1586	0.1068	0.1199	0.1065	0.323005	0.956862	0.869
Cognitive functions		4277	Volume level set by participant (right)	ordinal	54195			0.0327	0.0287	0.0092	0.008	0.328089	0.956862	0.8798	Volume level set by participant for right ear as a percentage of the maximum volume. Note that these value do not have some absolute correspondence to a dB scale as the maximum volume could vary between pieces of equipment and the choice might have been influenced by the level of background noise in the touchscreen area.
Cognitive functions		4282	Maximum digits remembered correctly	ordinal	16973			0.1274	0.1398	0.0266	0.0259	-0.333994	0.956862	0.7678	Longest number correctly recalled during the numeric memory test. A value of -1 is recorded if the participant chose to abandon the test before completing the first round.
Health and medical status	Mental	20507	Recent feelings of inadequacy	ordinal	51758			0.0353	0.0389	0.0085	0.0072	-0.323172	0.956862	0.8457	Question asked: "Over the last 2 weeks, how often have you been bothered by any of the following problems? [depressive symptoms] Feeling bad about yourself or that you are a failure or have let yourself or your family down"
Physical measures		1717	Skin colour	ordinal	164379			0.1311	0.1464	0.037	0.0363	-0.295177	0.957396	0.9812	ACE touchscreen question "What best describes the colour of your skin without tanning?" If the participant activated the Help button they were shown the message: If you are unsure, please provide an estimate or select Do not know.
icd10		Z13	Diagnoses - main ICD10: Z13 Special screening examination for other diseases and disorders	binary	167020	165967	1053	-0.0267	-0.0467	0.0468	0.0441	0.311021	0.957396
Molecular measures		30160	Basophill count	ordinal	162098			0.022	0.0236	0.0042	0.0031	-0.306504	0.957396	0.9946	Result of "Basophils Number" assay, performed on blood sample, obtained from UK Biobank assessment centre visit. Basophils count is the proportion of ( basophils / 100 ) x white blood cell count.
Physical measures		5087_irnt	Cylindrical power (right)	continuous_irnt	36406			0.014	0.0165	0.0061	0.0064	-0.282761	0.957396		This is the cylindrical power of refractometry results for the right eye (0.00 indicates none)
Physical measures		5156_irnt	3mm asymmetry index (left)	continuous_irnt	34075			0.0113	0.0086	0.006	0.0062	0.31294	0.957396		This is the asymmetry index as part of the keratometry result taken at 3mm for the left eye
Physical measures		4196_irnt	Pulse wave peak to peak time	continuous_irnt	55474			0.0241	0.0224	0.0039	0.0045	0.285483	0.957396	0.8346	peak to peak time in milliseconds A digital volume pulse can be considered to be the summation of a direct and a reflected component. The direct component is due to transmission of a pressure wave from the left ventricle to the finger via the most direct route. The reflected component is formed by pressure transmitted from the heart to the lower body where it is reflected back up the aorta and th…
Cognitive functions		20021_irnt	Speech-reception-threshold (SRT) estimate (right)	continuous_irnt	53226			0.0131	0.0115	0.0039	0.0039	0.290095	0.957396	0.6647	SRT is the Speech Reception Threshold, defined here as the signal-to-noise ratio at which half of the presented speech can be understood correctly. This was estimated as the value of the last round of the signal-to-noise ratio measurement for participants who completed all 15 rounds of the test (right-ear).
icd10		K40	Diagnoses - main ICD10: K40 Inguinal hernia	binary	167020	154647	12373	0.1475	0.1876	0.0153	0.129	-0.308689	0.957396	0.7473
icd10		S64	Diagnoses - main ICD10: S64 Injury of nerves at wrist and hand level	binary	167020	166793	227	-0.0855	0.0084	0.1576	0.2627	-0.306514	0.957396
icd10		L60	Diagnoses - main ICD10: L60 Nail disorders	binary	167020	166556	464	0.1164	0.076	0.0837	0.1032	0.304044	0.957396	0.8158
icd10		M94	Diagnoses - main ICD10: M94 Other disorders of cartilage	binary	167020	166900	120	0.0761	0.1727	0.2751	0.1644	-0.301423	0.957396
icd10		T42	Diagnoses - main ICD10: T42 Poisoning by antiepileptic, sedative-hypnotic and anti-Parkinsonism drugs	binary	167020	166812	208	0.1198	0.0475	0.2105	0.1153	0.301239	0.957396
icd10		K52	Diagnoses - main ICD10: K52 Other non-infective gastro-enteritis and colitis	binary	167020	163598	3422	0.0307	0.0227	0.0229	0.0142	0.296898	0.957396
icd10		T83	Diagnoses - main ICD10: T83 Complications of genito-urinary prosthetic devices, implants and grafts	binary	167020	166697	323	0.079	0.0302	0.1354	0.0977	0.292271	0.957396
icd10		J22	Diagnoses - main ICD10: J22 Unspecified acute lower respiratory infection	binary	167020	165382	1638	0.0121	-0.0039	0.0355	0.0418	0.291755	0.957396
icd10		J35	Diagnoses - main ICD10: J35 Chronic diseases of tonsils and adenoids	binary	167020	166733	287	0.0746	0.0247	0.1321	0.1108	0.289417	0.957396	*******************
icd10		D23	Diagnoses - main ICD10: D23 Other benign neoplasms of skin	binary	167020	165766	1254	0.0673	0.083	0.0452	0.0301	-0.289107	0.957396	0.0003
icd10		H74	Diagnoses - main ICD10: H74 Other disorders of middle ear and mastoid	binary	167020	166891	129	0.0245	0.1544	0.3175	0.3221	-0.287213	0.957396	*******************
Cancer code, sef-reported		20001_1052	Cancer code, self-reported: hodgkins lymphoma / hodgkins disease	binary	166988	166785	203	-0.2421	-0.1469	0.2191	0.2496	-0.286642	0.957396		Code for cancer. If the participant was uncertain of the type of cancer they had had, then they described it to the interviewer (a trained nurse) who attempted to place it within the coding tree. If the cancer could not be located in the coding tree then the interviewer entered a free-text description of it. These free-text descriptions were subsequently examined by a doctor and, where possible, …
icd10		K80	Diagnoses - main ICD10: K80 Cholelithiasis	binary	167020	164096	2924	0.0859	0.0948	0.0284	0.0135	-0.283031	0.957396	0.7575
icd10		R10	Diagnoses - main ICD10: R10 Abdominal and pelvic pain	binary	167020	159808	7212	0.0629	0.0584	0.0135	0.0085	0.282078	0.957396	0.7198
icd10		G51	Diagnoses - main ICD10: G51 Facial nerve disorders	binary	167020	166834	186	0.0775	-0.0007	0.1999	0.1922	0.281995	0.957396
icd10		I34	Diagnoses - main ICD10: I34 Nonrheumatic mitral valve disorders	binary	167020	166671	349	-0.0535	-0.125	0.1255	0.221	0.281332	0.957396
Health and medical status	Mental	4642	Ever manic/hyper for 2 days	binary	54148	50326	3822	0.0788	0.0631	0.0337	0.0368	0.314634	0.957396		ACE touchscreen question "Have you ever had a period of time lasting at least two days when you were feeling so good, "high", excited or "hyper" that other people thought you were not your normal self or you were so "hyper" that you got into trouble?"
icd10		M18	Diagnoses - main ICD10: M18 Arthrosis of first carpometacarpal joint	binary	167020	166810	210	0.0212	0.0726	0.1746	0.0602	-0.278309	0.957416	*******************
Physical measures		5096_irnt	3mm weak meridian (left)	continuous_irnt	35098			0.1838	0.1888	0.0129	0.0127	-0.276205	0.957416	0.9253	This is the weak meridian of keratometry results taken at 3mm for the left eye
Cancer code, sef-reported		20001_1035	Cancer code, self-reported: bladder cancer	binary	166988	166363	625	0.1007	0.0292	0.0754	0.2462	0.277684	0.957416	*******************	Code for cancer. If the participant was uncertain of the type of cancer they had had, then they described it to the interviewer (a trained nurse) who attempted to place it within the coding tree. If the cancer could not be located in the coding tree then the interviewer entered a free-text description of it. These free-text descriptions were subsequently examined by a doctor and, where possible, …
Physical measures		1747_2	Hair colour (natural, before greying): Red	binary	166357	159919	6438	0.3675	0.2778	0.272	0.1874	0.271565	0.960176	0.9777	ACE touchscreen question "What best describes your natural hair colour? (If your hair colour is grey, the colour before you went grey)" If the participant activated the Help button they were shown the message: If you are unsure, please select the colour closest to your natural adult hair colour or select Do not know.
icd10		S06	Diagnoses - main ICD10: S06 Intracranial injury	binary	167020	166497	523	0.047	-0.0021	0.094	0.1579	0.267194	0.962682
Health and medical status	Mental	20503	Ever addicted to prescription or over-the-counter medication	binary	3630	3209	421	0.1585	0.057	0.3235	0.2272	0.256759	0.96447		Question asked: "Have you been addicted to or dependent on prescription or over-the-counter medication?" Question was asked when ~F20401~ was Yes.
icd10		H81	Diagnoses - main ICD10: H81 Disorders of vestibular function	binary	167020	166867	153	-0.0021	0.0878	0.2799	0.1952	-0.263448	0.96447
icd10		D13	Diagnoses - main ICD10: D13 Benign neoplasm of other and ill-defined parts of digestive system	binary	167020	166782	238	0.0386	0.0906	0.1568	0.1271	-0.257626	0.96447	*******************
icd10		T39	Diagnoses - main ICD10: T39 Poisoning by nonopioid analgesics, antipyretics and antirheumatics	binary	167020	166536	484	0.0819	0.1154	0.1056	0.0765	-0.256906	0.96447	0.7982
Health and medical status	Mental	20508	Recent trouble concentrating on things	ordinal	51884			0.0347	0.0378	0.0092	0.0077	-0.258396	0.96447	1.1457	Question asked: "Over the last 2 weeks, how often have you been bothered by any of the following problems? [depressive symptoms] Trouble concentrating on things, such as reading the newspaper or watching television"
icd10		R18	Diagnoses - main ICD10: R18 Ascites	binary	167020	166860	160	0.2646	0.1892	0.231	0.1868	0.253806	0.965635	-0.2818
Cognitive functions		5866	FI13 : subset inclusion logic	binary	1213	853	360	0.3113	0.0799	0.6003	0.7012	0.250688	0.966073	*******************	ACE touchscreen question "If some flinks are plinks and some plinks are stinks then some flinks are definitely stinks?". Part 13 of Fluid Intelligence test. Offered choice from True, False, Neither-true-nor-false.
icd10		N18	Diagnoses - main ICD10: N18 Chronic renal failure	binary	167020	166704	316	0.1298	0.0724	0.1234	0.1937	0.249926	0.966073
icd10		M31	Diagnoses - main ICD10: M31 Other necrotising vasculopathies	binary	167020	166887	133	-0.1192	-0.0414	0.2497	0.1961	-0.245041	0.969032
Health and medical status		22502	Cough on most days	binary	41234	35186	6048	0.1218	0.1301	0.0243	0.0248	-0.23905	0.973015	0.9	Participant asked " Do you cough on most days?"
Life styles		1707_1	Handedness (chirality/laterality): Right-handed	binary	166874	21240	145634	0.0334	0.0314	0.0071	0.0074	0.195022	0.976136	0.6158	ACE touchscreen question "Are you right or left handed?"
Health and medical status		2443	Diabetes diagnosed by doctor	binary	166466	155780	10686	0.2225	0.2168	0.0168	0.0191	0.224081	0.976136	0.9848	ACE touchscreen question "Has a doctor ever told you that you have diabetes?" If the participant activated the Help button they were shown the message: If you are unsure if you have been told you had diabetes, select Do not know and you will be asked about this by an interviewer later during this visit.
Cognitive functions		4990	FI6 : conditional arithmetic	binary	47357	12504	34853	0.148	0.1425	0.0205	0.0165	0.209003	0.976136	1.0573	ACE touchscreen question "If sixty is more than half of seventy-five, multiply twenty-three by three. If not subtract 15 from eighty-five. Is the answer?". Part 6 of Fluid Intelligence test. Offered choice from 68, 69, 70, 71, 72.
Health and medical status		6149_1	Mouth/teeth dental problems: Mouth ulcers	binary	166385	151200	15185	0.0759	0.0792	0.0118	0.0107	-0.207171	0.976136	1.0667	ACE touchscreen question "Do you have any of the following? (You can select more than one answer)" The following checks were performed: If code -7 was selected, then no additional choices were allowed. If code -3 was selected, then no additional choices were allowed. If the participant activated the Help button they were shown the message: Answer this question thinking about the past year.
icd10		K25	Diagnoses - main ICD10: K25 Gastric ulcer	binary	167020	166141	879	0.0452	0.0275	0.0571	0.0519	0.229387	0.976136	0.4723
Health and medical status	Mental	20126_3	Bipolar and major depression status: Probable Recurrent major depression (severe)	binary	41187	38500	2687	0.0855	0.0738	0.0446	0.0351	0.206148	0.976136	0.7815	Bipolar and major depression status. This derived data field has come from Professor Jill Pell from the Institute of Health &amp; Wellbeing, University of Glasgow. Methods on how these fields were derived can be found in the Additional Resources tab.
Health and medical status	Mental	20483	Ever attempted suicide	binary	1550	694	856	0.0589	0.1545	0.4626	0.199	-0.189838	0.976136	*******************	Question asked: "Have you harmed yourself with the intention to end your life?" Question was asked when ~F20480~ was Yes.
icd10		K57	Diagnoses - main ICD10: K57 Diverticular disease of intestine	binary	167020	161349	5671	0.1422	0.1475	0.0178	0.015	-0.227688	0.976136	0.7504
Physical measures		4194_irnt	Pulse rate	continuous_irnt	55515			0.0701	0.0723	0.0069	0.0067	-0.228745	0.976136	0.8953	Pulse rate during arterial stiffness measurement
Cognitive functions		20023_irnt	Mean time to correctly identify matches	continuous_irnt	165802			0.0413	0.0419	0.0021	0.0023	-0.192648	0.976136	0.964	This field is the mean duration to first press of snap-button summed over rounds in which both cards matched. It gives a crude measure of the raw processing+reaction speed of a participant. The following data points were excluded when forming the average: Rounds 0-4 were regarded as "training"; Times under 50ms must be due to anticipation rather than reaction; Times over 2000ms were ignored as th…
Cancer code, sef-reported		20001_1034	Cancer code, self-reported: kidney/renal cell cancer	binary	166988	166687	301	0.2408	0.1749	0.1326	0.2603	0.225586	0.976136	0.0379	Code for cancer. If the participant was uncertain of the type of cancer they had had, then they described it to the interviewer (a trained nurse) who attempted to place it within the coding tree. If the cancer could not be located in the coding tree then the interviewer entered a free-text description of it. These free-text descriptions were subsequently examined by a doctor and, where possible, …
icd10		K76	Diagnoses - main ICD10: K76 Other diseases of liver	binary	167020	166728	292	0.2315	0.279	0.1514	0.1496	-0.223169	0.976136	0.5652
icd10		C18	Diagnoses - main ICD10: C18 Malignant neoplasm of colon	binary	167020	165767	1253	0.1053	0.0882	0.0462	0.0639	0.216862	0.976136	1.1845
icd10		I47	Diagnoses - main ICD10: I47 Paroxysmal tachycardia	binary	167020	166148	872	0.019	-0.0007	0.0608	0.0686	0.214911	0.976136
icd10		L40	Diagnoses - main ICD10: L40 Psoriasis	binary	167020	166772	248	0.2853	0.2268	0.1657	0.2169	0.214324	0.976136	1.1391
icd10		S00	Diagnoses - main ICD10: S00 Superficial injury of head	binary	167020	166501	519	0.0497	0.0169	0.0936	0.1213	0.214079	0.976136	*******************
icd10		M66	Diagnoses - main ICD10: M66 Spontaneous rupture of synovium and tendon	binary	167020	166806	214	-0.0761	-0.011	0.1996	0.2327	-0.212345	0.976136
icd10		L91	Diagnoses - main ICD10: L91 Hypertrophic disorders of skin	binary	167020	166773	247	0.102	0.145	0.1682	0.1178	-0.2094	0.976136	0.1428
icd10		R06	Diagnoses - main ICD10: R06 Abnormalities of breathing	binary	167020	164681	2339	0.0403	0.0304	0.0325	0.0347	0.208232	0.976136	0.7211
icd10		C83	Diagnoses - main ICD10: C83 Diffuse non-Hodgkin's lymphoma	binary	167020	166664	356	0.0121	-0.033	0.1227	0.1883	0.200668	0.976136
Diagnosed disease		22127	Doctor diagnosed asthma	binary	41234	36232	5002	0.1605	0.1508	0.0383	0.0305	0.198119	0.976136	1.0735	User asked "Has a doctor ever told you that you have had any of the conditions below?" "asthma" was one of the options listed.
icd10		K62	Diagnoses - main ICD10: K62 Other diseases of anus and rectum	binary	167020	160324	6696	0.0177	0.0137	0.0149	0.0143	0.193687	0.976136
icd10		K04	Diagnoses - main ICD10: K04 Diseases of pulp and periapical tissues	binary	167020	166396	624	0.0132	-0.0031	0.0699	0.0516	0.18761	0.976136
icd10		R13	Diagnoses - main ICD10: R13 Dysphagia	binary	167020	165565	1455	0.0411	0.0511	0.0429	0.0317	-0.187472	0.976136	0.329
icd10		I63	Diagnoses - main ICD10: I63 Cerebral infarction	binary	167020	165466	1554	0.0262	0.0402	0.0325	0.0681	-0.185534	0.976136	1.0009
icd10		I49	Diagnoses - main ICD10: I49 Other cardiac arrhythmias	binary	167020	166541	479	-0.0485	-0.0778	0.0834	0.1342	0.185439	0.976136
icd10		C43	Diagnoses - main ICD10: C43 Malignant melanoma of skin	binary	167020	166304	716	0.132	0.1135	0.0846	0.0533	0.185018	0.976136	0.4043
icd10		R11	Diagnoses - main ICD10: R11 Nausea and vomiting	binary	167020	166171	849	0.0722	0.0594	0.0577	0.0387	0.184235	0.976136	-0.6032
icd10		R04	Diagnoses - main ICD10: R04 Haemorrhage from respiratory passages	binary	167020	165323	1697	0.0711	0.0589	0.0352	0.0567	0.182805	0.976136	0.9802
Cognitive functions		4270	Volume level set by participant (left)	ordinal	54183			0.0243	0.0221	0.0083	0.0079	0.191995	0.976136		Volume level set by participant for left ear as a percentage of the maximum volume. Note that these value do not have some absolute correspondence to a dB scale as the maximum volume could vary between pieces of equipment and the choice might have been influenced by the level of background noise in the touchscreen area.
Health and medical status	Mental	20494	Felt irritable or had angry outbursts in past month	ordinal	19495			0.0438	0.0385	0.0229	0.0137	0.198612	0.976136	0.597	Question asked: "Please indicate how much you have been bothered by that problem in the past month: Feeling irritable or having angry outbursts?" Question was asked when ~F20497~ or ~F20498~ or ~F20495~ was at least "A little bit".
icd10		R51	Diagnoses - main ICD10: R51 Headache	binary	167020	165417	1603	0.0443	0.0517	0.0347	0.0229	-0.177991	0.977707	0.9357
icd10		Z45	Diagnoses - main ICD10: Z45 Adjustment and management of implanted device	binary	167020	165858	1162	-0.0067	0.0058	0.0503	0.0492	-0.177654	0.977707
icd10		S30	Diagnoses - main ICD10: S30 Superficial injury of abdomen, lower back and pelvis	binary	167020	166876	144	0.3548	0.438	0.301	0.375	-0.173023	0.980326	1.1601
Physical measures		23129_irnt	Trunk fat-free mass	continuous_irnt	163697			0.1466	0.148	0.0063	0.0053	-0.17005	0.98146	0.9259	Body composition estimation by impedance measurement. Trunk fat free mass. Trunk fat free mass in Kg, 0.1 increments.
icd10		L57	Diagnoses - main ICD10: L57 Skin changes due to chronic exposure to nonionising radiation	binary	167020	166299	721	0.0976	0.0783	0.081	0.0848	0.164579	0.984644
icd10		M51	Diagnoses - main ICD10: M51 Other intervertebral disk disorders	binary	167020	164939	2081	0.0697	0.0762	0.0319	0.0239	-0.163071	0.984644	0.943
Cancer code, sef-reported		20001_1053	Cancer code, self-reported: non-hodgkins lymphoma	binary	166988	166596	392	-0.0177	0.0118	0.1099	0.1489	-0.159403	0.984872		Code for cancer. If the participant was uncertain of the type of cancer they had had, then they described it to the interviewer (a trained nurse) who attempted to place it within the coding tree. If the cancer could not be located in the coding tree then the interviewer entered a free-text description of it. These free-text descriptions were subsequently examined by a doctor and, where possible, …
Physical measures		5986_irnt	ECG, phase time	continuous_irnt	25165			0.0189	0.0207	0.008	0.0079	-0.160096	0.984872	0.851	ECG, phase time The Bike Test consists of many phases. A phase is generally divided into number of stages. At various points during the test, called trends, readings about heart rate, workload etc are recorded. This field contains the time spent within the phase of the trend entry.
Life styles		1707_3	Handedness (chirality/laterality): Use both right and left hands equally	binary	166874	163373	3501	0.0354	0.0392	0.0211	0.0282	-0.107893	0.988291	0.9722	ACE touchscreen question "Are you right or left handed?"
Physical measures		1747_3	Hair colour (natural, before greying): Light brown	binary	166357	100744	65613	0.0766	0.0729	0.0244	0.0211	0.114701	0.988291	0.8943	ACE touchscreen question "What best describes your natural hair colour? (If your hair colour is grey, the colour before you went grey)" If the participant activated the Help button they were shown the message: If you are unsure, please select the colour closest to your natural adult hair colour or select Do not know.
Cognitive functions		4979	FI5 : family relationship calculation	binary	52355	28294	24061	0.0686	0.0662	0.0143	0.013	0.124186	0.988291	0.9727	ACE touchscreen question "If Truda's mother's brother is Tim's sister's father, what relation is Truda to Tim?". Part 5 of Fluid Intelligence test. Offered choice from Aunt, Sister, Niece, Cousin, No-relation.
Health and medical status		6148_6	Eye problems/disorders: Other serious eye condition	binary	54561	51337	3224	0.0432	0.0489	0.0326	0.027	-0.134659	0.988291	0.261	ACE touchscreen question "Has a doctor told you that you have any of the following problems with your eyes? (You can select more than one answer)" The following checks were performed: If code -7 was selected, then no additional choices were allowed. If code -3 was selected, then no additional choices were allowed. If code -1 was selected, then no additional choices were allowed. If the participan…
Health and medical status		6151_1	Fractured bone site(s): Ankle	binary	165950	164201	1749	0.0567	0.0524	0.0378	0.0211	0.0993294	0.988291	1.045	ACE touchscreen question "Which bones did you fracture/break? (You can select more than one answer)" The following checks were performed: If code -1 was selected, then no additional choices were allowed. If code -3 was selected, then no additional choices were allowed. ~F6151~ was collected from participants who indicated they have had fractured/broken bones in the last 5 years, as defined by the…
Health and medical status		6152_8	Blood clot, DVT, bronchitis, emphysema, asthma, rhinitis, eczema, allergy diagnosed by doctor: Asthma	binary	166695	148979	17716	0.1494	0.1466	0.0177	0.0118	0.131624	0.988291	0.894	ACE touchscreen question "Has a doctor ever told you that you have had any of the following conditions? (You can select more than one answer)" The following checks were performed: If code -7 was selected, then no additional choices were allowed. If code -3 was selected, then no additional choices were allowed. If the participant activated the Help button they were shown the message: If you do not…
icd10		K07	Diagnoses - main ICD10: K07 Dentofacial anomalies [including malocclusion]	binary	167020	166882	138	0.0101	-0.0352	0.2637	0.1387	0.152038	0.988291
Life style		20404	Ever physically dependent on alcohol	binary	1529	1024	505	0.0306	-0.085	0.4535	0.803	0.125351	0.988291	*******************	Question asked: "Have you been physically dependent on alcohol?" Question was asked when ~F20406~ was Yes.
Health and medical status	Mental	20468	Ever believed in an un-real conspiracy against self	binary	51798	51305	493	0.1114	0.1328	0.1271	0.1563	-0.106227	0.988291	0.493	Question asked: "Did you ever believe that there was an unjust plot going on to harm you or to have people follow you, and which your family and friends did not believe existed?"
Health and medical status	Mental	20502	Ever had period extreme irritability	binary	50523	37897	12626	0.1169	0.1144	0.0182	0.0143	0.108011	0.988291	0.8371	Question asked: "Have you ever had a period of time when you were so irritable that you found yourself shouting at people or starting fights or arguments?"
Physical measures		5135_irnt	3mm strong meridian (left)	continuous_irnt	35098			0.1747	0.1764	0.0124	0.0116	-0.100118	0.988291	0.9416	This is the strong meridian angle of keratometry results taken at 3mm for the left eye
Physical measures		5208_irnt	logMAR, final (left)	continuous_irnt	36907			0.0159	0.0172	0.0066	0.0054	-0.152446	0.988291	0.9002	Visual acuity (left), final logMAR
Physical measures		23130_irnt	Trunk predicted mass	continuous_irnt	163678			0.1463	0.1473	0.0063	0.0053	-0.121464	0.988291	0.926	Body composition estimation by impedance measurement. Trunk predicted mass in Kg, 0.1 increments.
icd10		K44	Diagnoses - main ICD10: K44 Diaphragmatic hernia	binary	167020	163958	3062	0.0479	0.0522	0.025	0.0149	-0.147749	0.988291	0.8474
icd10		S81	Diagnoses - main ICD10: S81 Open wound of lower leg	binary	167020	166862	158	-0.3686	-0.4243	0.2264	0.3059	0.14636	0.988291
icd10		I08	Diagnoses - main ICD10: I08 Multiple valve diseases	binary	167020	166877	143	0.3086	0.2439	0.2992	0.3651	0.137066	0.988291	0.4181
icd10		N36	Diagnoses - main ICD10: N36 Other disorders of urethra	binary	167020	166876	144	0.0008	0.0406	0.2353	0.1834	-0.133409	0.988291
Cancer code, sef-reported		20001_1073	Cancer code, self-reported: rodent ulcer	binary	166988	166754	234	0.2573	0.2875	0.1867	0.1406	-0.129214	0.988291	0.4291	Code for cancer. If the participant was uncertain of the type of cancer they had had, then they described it to the interviewer (a trained nurse) who attempted to place it within the coding tree. If the cancer could not be located in the coding tree then the interviewer entered a free-text description of it. These free-text descriptions were subsequently examined by a doctor and, where possible, …
icd10		R94	Diagnoses - main ICD10: R94 Abnormal results of function studies	binary	167020	166687	333	-0.1501	-0.17	0.1141	0.1113	0.124848	0.988291
icd10		C25	Diagnoses - main ICD10: C25 Malignant neoplasm of pancreas	binary	167020	166797	223	0.1232	0.087	0.1781	0.23	0.124444	0.988291
icd10		C34	Diagnoses - main ICD10: C34 Malignant neoplasm of bronchus and lung	binary	167020	166270	750	0.1381	0.1508	0.0684	0.0799	-0.120747	0.988291	0.2621
icd10		R93	Diagnoses - main ICD10: R93 Abnormal findings on diagnostic imaging of other body structures	binary	167020	166508	512	0.0588	0.0448	0.0975	0.0692	0.117095	0.988291	-1.1966
icd10		T18	Diagnoses - main ICD10: T18 Foreign body in alimentary tract	binary	167020	166799	221	0.1068	0.1576	0.1755	0.3976	-0.116886	0.988291
icd10		K51	Diagnoses - main ICD10: K51 Ulcerative colitis	binary	167020	165844	1176	0.1031	0.0937	0.0528	0.0624	0.114997	0.988291
icd10		K13	Diagnoses - main ICD10: K13 Other diseases of lip and oral mucosa	binary	167020	166026	994	0.0498	0.0422	0.0516	0.0451	0.110898	0.988291	0.285
icd10		Z03	Diagnoses - main ICD10: Z03 Medical observation and evaluation for suspected diseases and conditions	binary	167020	164579	2441	0.0297	0.0255	0.0275	0.0271	0.108783	0.988291
icd10		R19	Diagnoses - main ICD10: R19 Other symptoms and signs involving the digestive system and abdomen	binary	167020	163952	3068	0.0187	0.0219	0.0264	0.0132	-0.108415	0.988291	0.7716
icd10		M62	Diagnoses - main ICD10: M62 Other disorders of muscle	binary	167020	166840	180	0.2032	0.237	0.2118	0.2335	-0.107217	0.988291	0.6748
icd10		D35	Diagnoses - main ICD10: D35 Benign neoplasm of other and unspecified endocrine glands	binary	167020	166808	212	0.1131	0.09	0.1774	0.1234	0.106896	0.988291	-0.9596
icd10		L81	Diagnoses - main ICD10: L81 Other disorders of pigmentation	binary	167020	166828	192	-0.0205	0.0054	0.2063	0.1281	-0.106656	0.988291
icd10		I44	Diagnoses - main ICD10: I44 Atrioventricular and left bundle-branch block	binary	167020	166583	437	0.0223	-0.0034	0.0978	0.2224	0.105781	0.988291
icd10		M96	Diagnoses - main ICD10: M96 Postprocedural musculoskeletal disorders, not elsewhere classified	binary	167020	166911	109	-0.1687	-0.1265	0.3252	0.2522	-0.102543	0.988291
icd10		I50	Diagnoses - main ICD10: I50 Heart failure	binary	167020	166232	788	0.1647	0.1475	0.0637	0.1577	0.101129	0.988291
icd10		I35	Diagnoses - main ICD10: I35 Nonrheumatic aortic valve disorders	binary	167020	166422	598	0.1602	0.1784	0.079	0.17	-0.0970877	0.988753	0.4006
Health and medical status	Mental	20506	Recent feelings or nervousness or anxiety	ordinal	51789			0.0422	0.0434	0.01	0.0077	-0.0950795	0.989017	0.8896	Question asked: "Over the last 2 weeks, how often have you been bothered by any of the following problems? [anxiety symptoms] Feeling nervous, anxious or on edge"
Physical measures		1747_1	Hair colour (natural, before greying): Blonde	binary	166357	149898	16459	0.3062	0.2992	0.0567	0.0535	0.0897942	0.992062	1.0151	ACE touchscreen question "What best describes your natural hair colour? (If your hair colour is grey, the colour before you went grey)" If the participant activated the Help button they were shown the message: If you are unsure, please select the colour closest to your natural adult hair colour or select Do not know.
icd10		R33	Diagnoses - main ICD10: R33 Retention of urine	binary	167020	165065	1955	0.0439	0.0315	0.0321	0.1412	0.0856337	0.994146
Health and medical status	Mental	20501	Ever had period of mania / excitability	binary	50474	47996	2478	0.1143	0.1198	0.0531	0.041	-0.0819836	0.995793	0.7277	Question asked: "Have you ever had a period of time when you were feeling so good, "high", "excited", or "hyper" that other people thought you were not your normal self or you were so "hyper" that you got into trouble?"
Health and medical status	Mental	2030	Guilty feelings	binary	163043	127665	35378	0.088	0.0885	0.0076	0.006	-0.051637	0.999655	0.9321	ACE touchscreen question "Are you often troubled by feelings of guilt?" If the participant activated the Help button they were shown the message: Work through these questions quickly and do not think about the exact meaning of the question
icd10		D12	Diagnoses - main ICD10: D12 Benign neoplasm of colon, rectum, anus and anal canal	binary	167020	161857	5163	0.0948	0.0968	0.0181	0.0229	-0.0685181	0.999655	1.0286
Molecular measures		30150	Eosinophill count	ordinal	162098			0.154	0.1529	0.0134	0.0133	0.0582631	0.999655	0.9483	Result of "Eosinophils Number" assay, performed on blood sample, obtained from UK Biobank assessment centre visit. Eosinophils count is the proportion of ( eosinophils / 100 ) x white blood cell count.
icd10		S32	Diagnoses - main ICD10: S32 Fracture of lumbar spine and pelvis	binary	167020	166556	464	0.0812	0.0919	0.1025	0.118	-0.0684573	0.999655	0.467
icd10		R09	Diagnoses - main ICD10: R09 Other symptoms and signs involving the circulatory and respiratory systems	binary	167020	166860	160	-0.0929	-0.0738	0.2388	0.1728	-0.0647978	0.999655
icd10		H66	Diagnoses - main ICD10: H66 Suppurative and unspecified otitis media	binary	167020	166794	226	0.1838	0.2004	0.1965	0.1672	-0.0643391	0.999655	-0.5228
icd10		G35	Diagnoses - main ICD10: G35 Multiple sclerosis	binary	167020	166849	171	0.0722	0.0876	0.2248	0.0893	-0.063666	0.999655	-0.0308
icd10		K58	Diagnoses - main ICD10: K58 Irritable bowel syndrome	binary	167020	166736	284	0.0426	0.0529	0.1563	0.0496	-0.0628121	0.999655	*******************
icd10		K86	Diagnoses - main ICD10: K86 Other diseases of pancreas	binary	167020	166728	292	-0.0945	-0.08	0.1413	0.1886	-0.0615293	0.999655
Cancer code, sef-reported		20001_1022	Cancer code, self-reported: colon cancer/sigmoid cancer	binary	166988	166288	700	0.0385	0.0315	0.0705	0.0923	0.0602698	0.999655	0.8332	Code for cancer. If the participant was uncertain of the type of cancer they had had, then they described it to the interviewer (a trained nurse) who attempted to place it within the coding tree. If the cancer could not be located in the coding tree then the interviewer entered a free-text description of it. These free-text descriptions were subsequently examined by a doctor and, where possible, …
icd10		S42	Diagnoses - main ICD10: S42 Fracture of shoulder and upper arm	binary	167020	166116	904	0.102	0.0972	0.0593	0.0619	0.0559956	0.999655	0.5813
icd10		M16	Diagnoses - main ICD10: M16 Coxarthrosis [arthrosis of hip]	binary	167020	163053	3967	0.1404	0.1385	0.0299	0.018	0.0544413	0.999655	0.7091
icd10		K61	Diagnoses - main ICD10: K61 Abscess of anal and rectal regions	binary	167020	166298	722	-0.0053	-0.0144	0.0637	0.1593	0.0530415	0.999655
icd10		Z01	Diagnoses - main ICD10: Z01 Other special examinations and investigations of persons without complaint or reported diagnosis	binary	167020	166524	496	0.0192	0.0138	0.0917	0.0519	0.0512488	0.999655	*******************
icd10		R21	Diagnoses - main ICD10: R21 Rash and other nonspecific skin eruption	binary	167020	166848	172	-0.2179	-0.2042	0.2312	0.1753	-0.0472179	0.999655
icd10		H90	Diagnoses - main ICD10: H90 Conductive and sensorineural hearing loss	binary	167020	166880	140	-0.3952	-0.412	0.242	0.2654	0.0467749	0.999655
icd10		R60	Diagnoses - main ICD10: R60 Oedema, not elsewhere classified	binary	167020	166906	114	0.0542	0.0335	0.3011	0.3266	0.0465988	0.999655	*******************
Health and medical status	Mental	20458	General happiness	ordinal	51751			0.0638	0.0646	0.0104	0.0085	-0.0595607	0.999655	0.8599	Question asked: "In general how happy are you?"
Health and medical status		2247_1	Hearing difficulty/problems: Yes	binary	161251	110686	50565	0.0884	0.0885	0.0062	0.0077	-0.0101155	1	0.8009	ACE touchscreen question "Do you have any difficulty with your hearing?" The option to identify oneself as completely deaf was added in 2009 alongside the introduction of the speech-in-noise test.
Cognitive functions		4946	FI2 : identify largest number	binary	54168	380	53788	-0.0194	-0.0257	0.1439	0.1139	0.0343283	1		ACE touchscreen question "Which number is the largest?". Part 2 of Fluid Intelligence test. Asked to choose from 642, 308, 987, 714 and 253.
Cognitive functions		5556	FI9 : concept interpolation	binary	16813	6704	10109	0.2182	0.2195	0.0477	0.043	-0.0202427	1		ACE touchscreen question "Age is to Years as Height is to?". Part 9 of Fluid Intelligence test. Offered choice from Long, Deep, Top, Metres or Tall.
Health and medical status		6015	Chest pain felt during physical activity	binary	25194	932	24262	0.1187	0.1144	0.0865	0.0787	0.0367697	1	0.7433	Exercise safety question 2, asked prior to fitness test "Do you feel pain in your chest when you do physical activity"
Health and medical status		6148_4	Eye problems/disorders: Cataract	binary	54561	49895	4666	0.0461	0.0448	0.0259	0.0191	0.0403964	1		ACE touchscreen question "Has a doctor told you that you have any of the following problems with your eyes? (You can select more than one answer)" The following checks were performed: If code -7 was selected, then no additional choices were allowed. If code -3 was selected, then no additional choices were allowed. If code -1 was selected, then no additional choices were allowed. If the participan…
icd10		S62	Diagnoses - main ICD10: S62 Fracture at wrist and hand level	binary	167020	165898	1122	0.1302	0.1345	0.0506	0.0838	-0.0439261	1	0.1193
Physical measures		5132_irnt	3mm strong meridian (right)	continuous_irnt	35174			0.1759	0.1756	0.012	0.0119	0.0177515	1	0.9485	This is the strong meridian angle of keratometry results taken at 3mm for the right eye
Physical measures		5201_irnt	logMAR, final (right)	continuous_irnt	36944			0.0224	0.0223	0.0056	0.0059	0.0122933	1	0.4775	Visual acuity (right), final logMAR
icd10		K09	Diagnoses - main ICD10: K09 Cysts of oral region, not elsewhere classified	binary	167020	166867	153	-0.1192	-0.1317	0.2159	0.2902	0.0345588	1
icd10		J38	Diagnoses - main ICD10: J38 Diseases of vocal cords and larynx, not elsewhere classified	binary	167020	166381	639	-0.0081	-0.004	0.084	0.096	-0.0321413	1
icd10		N62	Diagnoses - main ICD10: N62 Hypertrophy of breast	binary	167020	166908	112	0.0281	0.0383	0.3085	0.0808	-0.0319844	1	*******************
icd10		R55	Diagnoses - main ICD10: R55 Syncope and collapse	binary	167020	164121	2899	0.0808	0.0819	0.0238	0.0284	-0.0296864	1	0.7233
icd10		Z12	Diagnoses - main ICD10: Z12 Special screening examination for neoplasms	binary	167020	165230	1790	0.0326	0.0338	0.0339	0.0278	-0.0273715	1	-0.4122
icd10		I74	Diagnoses - main ICD10: I74 Arterial embolism and thrombosis	binary	167020	166653	367	0.1774	0.1861	0.1228	0.3025	-0.0266483	1	0.2509
icd10		J47	Diagnoses - main ICD10: J47 Bronchiectasis	binary	167020	166868	152	0.2607	0.2685	0.2524	0.1487	-0.0266261	1	0.9917
icd10		K55	Diagnoses - main ICD10: K55 Vascular disorders of intestine	binary	167020	166862	158	0.1628	0.1563	0.223	0.1749	0.0229353	1	0.4893
icd10		R25	Diagnoses - main ICD10: R25 Abnormal involuntary movements	binary	167020	166905	115	0.3158	0.3047	0.3385	0.3603	0.022453	1	0.2509
icd10		E04	Diagnoses - main ICD10: E04 Other non-toxic goitre	binary	167020	166843	177	0.1646	0.1697	0.2317	0.0486	-0.0215424	1	0.9026
icd10		Z04	Diagnoses - main ICD10: Z04 Examination and observation for other reasons	binary	167020	166808	212	0.0759	0.0798	0.1901	0.1322	-0.0168431	1	0.0731
icd10		G56	Diagnoses - main ICD10: G56 Mononeuropathies of upper limb	binary	167020	164382	2638	0.1375	0.1379	0.0314	0.0164	-0.0112915	1	1.0015
icd10		I77	Diagnoses - main ICD10: I77 Other disorders of arteries and arterioles	binary	167020	166545	475	0.043	0.0448	0.1054	0.2369	-0.00694206	1	*******************
Diagnosed disease		22128	Doctor diagnosed emphysema	binary	41234	41062	172	0.3941	0.3905	0.28	0.4926	0.0063535	1	0.6506	User asked "Has a doctor ever told you that you have had any of the conditions below?" "emphysema" was one of the options listed.
Non-cancer illness code, self-reported		20002_1466	Non-cancer illness code, self-reported: gout	binary	166988	162191	4797	0.2723	0.2715	0.0638	0.2716	0.00286746	1	0.9604	Code for non-cancer illness. If the participant was uncertain of the type of illness they had had, then they described it to the interviewer (a trained nurse) who attempted to place it within the coding tree. If the illness could not be located in the coding tree then the interviewer entered a free-text description of it. These free-text descriptions were subsequently examined by a doctor and, wh…
icd10		K31	Diagnoses - main ICD10: K31 Other diseases of stomach and duodenum	binary	167020	166085	935	0.0274	0.0272	0.059	0.0395	0.00281683	1	0.9963
icd10		D48	Diagnoses - main ICD10: D48 Neoplasm of uncertain or unknown behaviour of other and unspecified sites	binary	167020	166802	218	0.1165	0.1164	0.1597	0.1164	0.000506026	1	0.9353
Health and medical status	Mental	4598	Ever depressed for a whole week	binary	54651	29279	25372	0.0987	0.0989	0.0149	0.0141	-0.00974949	1	1.072	ACE touchscreen question "Looking back over your life, have you ever had a time when you were feeling depressed or down for at least a whole week?"
icd10		K11	Diagnoses - main ICD10: K11 Diseases of salivary glands	binary	167020	166675	345	-0.1348	-0.1348	0.1272	0.1004	0	1
