# Supplementary material for: Identifying sex-specific genetic effects across 733 traits in UK Biobank
Source: Research Square preprint supplement (doi:10.21203/rs.3.rs-701876/v1), 2021-07-20
Supplement: Supplementary file 3 [file A. Fat.xlsx]

## Sheet: 23123_irnt
CHR	Band	locus	Range	Type	p_male	beta_male	se_male	p_female	beta_female	se_female	Min P_diff	Type (Rep)	p_male (Rep)	beta_male (Rep)	se_male (Rep)	p_female (Rep)	beta_female (Rep)	se_female (Rep)	Min p_diff (Rep)	Type (Final)	beta_male (Meta)	se_male (Meta)	p_male (Meta)	beta_female (Meta)	se_female (Meta)	p_female (Meta)	Genes	QTL Genes
16	q12.2	rs62048402	53303223:54303223	CED	2.70015e-72	0.0635138	0.00353035	1.95355e-73	0.059494	0.00328066	0.0777902	CED	1.66218e-26	0.0573743	0.00538033	2.85963e-12	0.0389638	0.00557698	8.87059e-26		0.061666	0.00295167	6.33885e-97	0.0542161	0.00282769	6.19092e-82	FTO
11	p11.2	rs12798028	47104639:48104639	CED	9.71216e-29	0.0390942	0.0035141	1.89937e-20	0.0303216	0.00327132	0.00121276	AED	0.0127487	-0.0150084	0.00602542	2.33083e-06	-0.0292372	0.00619031	0.00878146		0.0253626	0.00303557	6.53583e-17	0.0173197	0.00289229	2.12128e-09	NDUFS3	RAPSN, NUP160, MYBPC3, ACP2, NR1H3, PSMC3, FAM180B, MADD, MTCH2, FNBP4, C1QTNF4, DDB2, SPI1, AC090559.1, PTPMT1, CELF1
16	p11.2	rs27741	28004181:29004181	CED	6.37926e-26	0.0370213	0.00351566	1.7532e-17	0.0278371	0.00327114	0.000744763	AED	6.13837e-11	0.0358216	0.0054752	0.000264202	0.0205172	0.00562362	0.0159369		0.0366711	0.00295831	2.74831e-35	0.0259865	0.00282758	3.91392e-20	CLN3	EIF3C, SH2B1, APOBR, NUPR1, SPNS1, AC145285.2, ATP2A1, NPIPB7, CLN3, P8, TUFM, AC138894.3, ATXN2L, XPO6, NPIPB15, RRN3P2, NPIPB8, SGF29, AC145285.5, SULT1A2, EIF3CL, IL27, SBK1, CDC37P1, NPIPB6, ATP2A1-AS1, SULT1A1
2	p23.3	rs4430895	24661386:25661386	CED	3.3017e-25	0.0359687	0.00346707	1.65214e-33	0.0388701	0.00322158	0.00506516	CED	0.0164318	0.0130577	0.00544229	2.46071e-05	0.0236566	0.00560736	0.0236352		0.0293546	0.00292411	1.02886e-23	0.0350946	0.00279338	3.35158e-36	ADCY3, DNAJC27	ADCY3, DNAJC27-AS1, CENPO, DNAJC27, POMC
2	q36.3	rs2943650	226605921:227605921	SSE	1.86835e-23	-0.0361635	0.00362311	0.00314288	-0.00992833	0.00336161	1.03118e-07	SSE_Male	1.45898e-09	0.0455922	0.00753519	0.524749	0.0049403	0.00776719	8.61425e-05	SSE	-0.0208114	0.00326527	1.8466e-10	-0.00758263	0.00308507	0.0139772	AC068138.1, MIR5702	IRS1
6	p12.3	rs3798519	50288778:51288778	CED	6.7286e-22	0.0435125	0.00452355	4.7983e-10	0.0261635	0.00420238	0.00118914	AED	9.50642e-05	0.0550709	0.0141087	0.000196861	0.0547335	0.0147001	0.00136373		0.0445899	0.00430756	4.11771e-25	0.028322	0.00404052	2.39194e-12	TFAP2B	TFAP2B
12	q13.12	rs7132908	49763148:50763148	CED	5.94653e-19	0.0316494	0.00355847	3.25424e-13	0.0241574	0.00331653	0.0270524	CED	3.14752e-06	0.0257556	0.00552486	1.07472e-07	0.0300711	0.00565827	0.0568178		0.0299213	0.00299164	1.49895e-23	0.0256696	0.00286125	2.92612e-19	FAIM2	ARF3
18	q21.32	rs139806266	57587882:58587882	CED	2.58179e-18	-0.107236	0.0122843	1.5158e-20	-0.106256	0.011434	0.100856	CED	0.286997	-0.0147684	0.0138703	3.45782e-06	-0.0675653	0.0145546	0.00268293		-0.0665888	0.00919615	4.45567e-13	-0.0914904	0.00899129	2.55218e-24	MC4R, RP11-325K19.3
4	q24	rs13107325	102688709:103688709	CED	5.29602e-18	0.0566874	0.00655512	1.57527e-13	0.0454607	0.006159	0.0100861	AED	0.0203228	0.0246009	0.0106018	8.05488e-07	0.0539256	0.0109276	0.0137668		0.0478133	0.00557545	9.84921e-18	0.0475014	0.00536547	8.50612e-19	SLC39A8	SLC39A8
2	p25.3	rs62106258	0:917167	CED	2.0915e-17	-0.0688767	0.00811312	6.55183e-30	-0.0849562	0.00747672	0.00400845	AED	0.00015799	-0.0479277	0.012684	6.80134e-11	-0.0835218	0.012797	0.0113039		-0.0627943	0.00683458	4.01225e-20	-0.0845912	0.00645564	3.14617e-39	AC105393.1, AC105393.2	SH3YL1
1	q21.2	rs11205303	149406413:150406413	SSE	3.35007e-16	0.0295585	0.00362198	0.000243293	0.0123253	0.00335904	0.000293112	AED	0.000703025	0.0185563	0.00547591	0.054592	0.0107833	0.00560996	0.101718		0.02621	0.00302094	4.09535e-18	0.0119184	0.00288192	3.54095e-05	MTMR11	SV2A
4	p12	rs10938398	44686139:45686139	CED	5.46098e-16	0.0283333	0.00349724	2.17323e-18	0.0284594	0.00325294	0.168823	CED	0.00239549	0.0164895	0.00543047	1.79631e-05	0.0237655	0.00554064	0.0121102		0.0248612	0.00294027	2.78082e-17	0.0272562	0.0028052	2.56968e-22	RP11-362I1.1, PRKRIRP9
5	q14.3	rs34483452	87486314:88486314	CED	5.75104e-16	0.041303	0.00510209	4.64067e-09	0.0278436	0.0047516	0.00197673	CED	0.000363538	0.0262443	0.00736042	8.7157e-05	0.0296342	0.00755166	0.0285634		0.0364157	0.00419319	3.80459e-18	0.0283515	0.00402172	1.79445e-12	CTC-467M3.1	MEF2C
19	p13.11	rs11668601	17714521:18714521	SSE	9.81542e-16	0.0283763	0.0035338	2.35037e-06	0.0154888	0.00328094	0.0010167		0.147705	0.00860335	0.0059427	0.00196495	0.0189152	0.00611021	0.0360013		0.023211	0.00303736	2.14155e-14	0.0162556	0.00289058	1.86964e-08	MAST3	PDE4C, MPV17L2, MAST3, IQCN, RAB3A, IL12RB1, IFI30
15	q23	rs58648944	67465102:68465102	CED	8.67131e-15	0.0274743	0.00354138	2.56116e-07	0.0169703	0.00329305	0.00416251		0.0237049	-0.0146038	0.0064562	1.60354e-08	-0.0371714	0.00657759	0.00573209		0.0177421	0.00310495	1.10258e-08	0.00611954	0.00294463	0.0376906	MAP2K5
18	q21.32	rs2168711	57348531:58348531	CED	1.30395e-14	0.0315555	0.00409485	3.99935e-31	0.0440501	0.00379591	0.00207351	CED	0.000187508	0.0236616	0.00633389	2.65328e-09	0.0383889	0.00644862	0.00320462		0.0292287	0.00343879	1.90092e-17	0.0425933	0.00327125	9.3549e-39	RNU4-17P, RP11-795H16.2
1	q41	rs10495121	219137686:220137686	CED	1.70148e-14	0.0293702	0.00382819	2.4202e-09	0.0212261	0.00355722	0.00919724	CED	1.52948e-05	0.0245154	0.00566823	0.330965	0.00568447	0.00584712	0.0103787		0.0278494	0.00317244	1.65574e-18	0.0170278	0.00303901	2.10595e-08	RP11-95P13.1, RP11-95P13.2	LYPLAL1, LYPLAL1-AS1
4	q22.1	rs6814344	89233882:90233882	SSE	3.74899e-14	-0.026308	0.00347526	0.0101682	-0.00829218	0.00322642	5.89663e-05		0.0229771	0.0140385	0.00617366	0.256928	0.00713253	0.00629138	0.0976411		-0.0165995	0.00302841	4.22282e-08	-0.00508026	0.00287091	0.0768	FAM13A	FAM13A
9	p22.3	rs10756713	15380555:16380555	CED	5.28508e-14	-0.0262988	0.0034947	2.57578e-15	-0.0256343	0.00324051	0.0848004		0.0825714	-0.00951101	0.00547866	0.000799949	-0.0188785	0.00563022	0.0147704		-0.0214436	0.00294633	3.38588e-13	-0.0239532	0.00280854	1.48001e-17	CCDC171	CCDC171
12	q24.31	rs7133378	123909502:124909502	CED	7.16985e-14	0.0278907	0.00372602	1.96823e-13	0.0254584	0.00346304	0.0994654	SSE_Female	0.0107084	0.014538	0.00569623	7.08529e-05	0.0233131	0.0058667	0.00128992		0.0238895	0.00311817	1.83971e-14	0.0249041	0.00298223	6.78009e-17	CCDC92	ZNF664, RP11-380L11.4, CCDC92, DNAH10OS, DNAH10
22	q13.1	rs2267372	38098234:39098234	SSE	1.44678e-13	-0.0260531	0.00352421	5.71834e-05	-0.0132553	0.00329387	0.0056841	CED	2.88335e-05	0.022695	0.00542542	0.888897	0.000779026	0.00557641	0.00138659		-0.0115877	0.00295543	8.82519e-05	-0.00962523	0.00283607	0.000689128	MAFF	NOL12, BAIAP2L2, CPAMD8, MAFF, PLA2G6, ANKRD54, TMEM184B, CSNK1E, TDRKH
1	q25.2	rs543874	177389480:178389480	CED	2.86633e-13	0.0311513	0.00426664	5.49718e-36	0.0497187	0.00396896	8.4385e-05	CED	0.0140116	0.0163235	0.00664343	8.96357e-14	0.0508557	0.00681907	0.000143232		0.0268213	0.00359002	7.95437e-14	0.0500064	0.00343024	3.86989e-48	RP11-63B19.1, SEC16B
6	p12.3	rs2817419	50312906:51312906	CED	4.71835e-13	0.0284602	0.00393435	6.98804e-10	0.0226383	0.00367107	0.00345723	CED	9.10172e-05	-0.0389679	0.00995639	0.309893	-0.0103506	0.010193	0.0108622		0.0193533	0.00365903	1.22853e-07	0.0188506	0.00345389	4.82149e-08	TFAP2B	TFAP2B
1	p31.1	rs2815748	72316147:73316147	SSE	5.23057e-13	0.0313458	0.00434167	5.89846e-07	0.0201277	0.00402983	0.00125229	AED	0.0117843	-0.0170462	0.00676792	0.00361217	-0.0201392	0.00691984	0.00392122		0.0172371	0.00365436	2.39507e-06	0.00992998	0.00348236	0.0043512	RPL31P12, RNU6-1246P	RPL31P12, NEGR1
2	p25.3	rs6751993	135864:1135864	CED	8.66482e-13	0.0327622	0.00458162	6.31597e-28	0.046667	0.00425937	0.00387281		1.21541e-09	-0.0406	0.00667759	0.000796846	-0.0230161	0.006862	0.00170433		0.0092805	0.00377788	0.0140283	0.027286	0.00361889	4.7034e-14	AC093326.3, TMEM18	CHD3, SH3YL1
1	p31.3	rs12140153	62079891:63079891	CED	1.18885e-12	-0.0427007	0.00600808	1.0688e-06	-0.0274038	0.00561705	0.0532793	CED	0.00150131	-0.0174131	0.00548497	5.8111e-05	-0.0226248	0.00562697	0.109697		-0.0289083	0.0040508	9.57706e-13	-0.0250185	0.00397536	3.10584e-10	INADL	L1TD1
2	p13.3	rs4410328	69100683:70100683	SSE	1.66561e-12	-0.0249415	0.00353254	0.0844127	-0.00565256	0.00327562	4.61813e-05	CED	3.01577e-08	-0.0309121	0.00557787	0.141114	-0.00842138	0.00572227	0.00244277		-0.0266507	0.00298438	4.25826e-19	-0.00633592	0.0028428	0.0258299	GFPT1	NFU1, GFPT1, SNRNP27
9	p22.2	rs10810611	16256377:17256377	CED	2.008e-12	-0.0257475	0.0036602	2.86241e-08	-0.0188198	0.00339103	0.0169564		0.66027	0.00285446	0.00649413	0.000402556	0.0235599	0.0066578	0.00673591		-0.0188521	0.00318862	3.37336e-09	-0.0100903	0.00302167	0.000839849	BNC2
11	p14.1	rs11030119	27228102:28228102	CED	2.35197e-12	0.0263352	0.00375554	5.43574e-20	0.0318988	0.00348392	0.0993913	AED	0.199284	0.00783376	0.00610287	0.000615784	0.0213956	0.00624721	0.0176057		0.0212534	0.00319845	3.03426e-11	0.0294072	0.00304275	4.25997e-22	RP11-587D21.4	BDNF, LIN7C
1	p13.3	rs17024393	109654688:110654688	CED	3.71152e-12	0.0764458	0.0110021	3.34866e-09	0.0600861	0.0101603	0.0172428	SSE_Male	2.07054e-07	0.088834	0.0171032	0.22309	0.021084	0.0173051	0.00208595		0.0800717	0.00925296	4.98871e-18	0.0500879	0.00876175	1.0864e-08	GNAT2	GSTM1, GSTM4, GSTM2, KIAA1324, GSTM3, SORT1, AMIGO1, PSRC1
8	q23.3	rs2737263	116167539:117167539	CED	1.08923e-11	-0.0261302	0.00384568	9.04158e-10	-0.0218439	0.00356589	0.0169932	CED	1.55768e-05	-0.0252669	0.00584742	0.160777	-0.00836534	0.00596463	0.00959844		-0.0258695	0.00321308	8.1899e-16	-0.0182949	0.00306064	2.26601e-09	TRPS1	TRPS1
3	p25.2	rs7649970	11892272:12892272	CED	1.11454e-11	0.0357306	0.00526118	1.41038e-07	0.025874	0.00491518	0.0122074	CED	0.0267133	-0.0120777	0.00545074	8.39668e-05	-0.0219645	0.00558441	0.00983229		0.0126722	0.00378546	0.000815135	0.00499158	0.0036896	0.176095	PPARG	SYN2
7	q11.23	rs28888492	76195502:77195502	SSE	1.47601e-11	0.0343362	0.0050863	0.0014431	0.0149497	0.00469241	0.000303141		0.675672	-0.00242748	0.00580209	0.000110132	-0.0229757	0.00594073	0.00365352		0.0183608	0.00382474	1.58245e-06	0.000378873	0.00368228	0.91805	RP11-467H10.2	DTX2P1, PMS2P9, PMS2P3, UPK3BP1, POMZP3
2	p16.1	rs6545714	58807725:59807725	CED	2.13886e-11	-0.0237421	0.00354536	5.56682e-08	-0.0179004	0.00329511	0.00928026	AED	0.00127843	0.0189468	0.00588215	0.0389247	0.0124887	0.00604767	0.00225595		-0.0123664	0.00303646	4.64797e-05	-0.010944	0.00289349	0.0001554	LINC01122, AC007131.1
12	q24.31	rs147730268	122524476:123524476	CED	2.2168e-11	-0.0418208	0.00624989	5.54239e-10	-0.0358298	0.00577597	0.174938	CED	0.0631727	-0.0112318	0.006045	1.4296e-05	-0.0268884	0.0061958	0.0165695		-0.0260167	0.00434509	2.12951e-09	-0.0316723	0.00422486	6.54699e-14	KNTC1	RSRC2, HCAR1, HCAR3
3	p25.2	rs6809832	11914420:12914420	CED	2.24331e-11	-0.0327569	0.00489662	0.000208722	-0.0168427	0.0045419	0.0171811		0.211994	-0.00750228	0.00601083	0.00017353	-0.0231251	0.00615837	0.023469		-0.0226827	0.00379637	2.30301e-09	-0.019056	0.00365531	1.85565e-07	PPARG	SYN2, PPARG, TSEN2
19	p13.3	rs57904377	3550832:4550832	CED	2.3579e-11	-0.0297785	0.00445625	1.60087e-06	-0.0199015	0.00414757	0.0244575		0.354785	-0.00536652	0.00579938	0.00708265	-0.0160823	0.00597174	0.0121248		-0.0207157	0.00353355	4.55718e-09	-0.0186587	0.00340655	4.31852e-08	ZBTB7A	PIAS4, EEF2, ZBTB7A, MAP2K2
1	p31.3	rs2481665	62094677:63094677	CED	2.44315e-11	-0.0366492	0.0054887	6.07221e-05	-0.0204129	0.00509041	0.00449344	CED	0.00683565	-0.0149684	0.00553375	0.000117624	-0.0217168	0.00563868	0.00600635		-0.0258974	0.00389693	3.01988e-11	-0.0209984	0.00377847	2.73855e-08	INADL	PATJ, L1TD1
5	q35.1	rs10038105	169854039:170854039	CED	2.64935e-11	0.0259344	0.00389095	3.42079e-07	0.0184703	0.00362246	0.0937564		0.0171522	-0.0137177	0.00575516	0.608452	-0.00301365	0.00588271	0.0723681		0.0134956	0.00322339	2.82949e-05	0.0125636	0.00308455	4.63962e-05	RANBP17	RANBP17, ZNF836, AC008514.2
1	q22	rs72704117	154675089:155675089	SSE	2.8581e-11	-0.0765829	0.011509	0.228838	-0.0128665	0.0106922	2.69988e-05	SSE_Male	0.000104733	-0.0626328	0.0161432	0.134966	-0.0244983	0.0163887	0.00826508	SSE	-0.0718819	0.00937126	1.71378e-14	-0.0163393	0.00895492	0.0680586	RP11-263K19.4	PMF1, ADAM15, GBAP1, EFNA3, THBS3
12	q24.31	rs825453	124008758:125008758	CED	3.29115e-11	-0.0235996	0.00355771	8.22821e-11	-0.0214544	0.00330234	0.0513398	AED	0.243504	-0.00638342	0.00547324	8.18485e-05	-0.0221351	0.00561901	0.0116521		-0.018486	0.00298291	5.74444e-10	-0.0216292	0.00284706	3.03011e-14	FAM101A
6	p22.2	rs62396185	25680634:26680634	CED	3.98954e-11	-0.0277433	0.0042004	1.77791e-09	-0.0233885	0.00388695	0.122008	AED	0.000118129	0.0212931	0.00553003	0.0666575	0.0104183	0.00568057	8.42576e-06		-0.00980293	0.00334491	0.00338193	-0.0126077	0.00320786	8.48613e-05	HIST1H2BD, HIST1H2BE	HIST1H3B, BTN1A1, HIST1H4H, HIST1H2BF, TRIM38, BTN3A2, BTN2A2, HIST1H2BK, HIST1H4E, HIST1H2AE, SLC17A3, HIST1H2BD, HIST1H3D, B4GAT1
3	q22.1	rs12498044	131095531:132095531	CED	4.53433e-11	0.0255102	0.00387345	2.07773e-06	0.0170373	0.00358994	0.0488438	CED	0.00856182	0.0158447	0.00602635	3.40026e-05	0.0256073	0.00617741	0.00920622		0.0226845	0.00325842	3.35935e-12	0.0192009	0.00310387	6.16678e-10	CPNE4	CPNE4
1	q22	rs72706148	155241305:156241305	SSE	5.77452e-11	-0.0924238	0.0141107	0.767464	-0.0038781	0.0131152	4.30021e-06	SSE_Male	0.000202799	-0.0606972	0.0163344	0.334201	-0.0162482	0.0168254	0.0290149	SSE	-0.0788655	0.0106781	1.51626e-13	-0.00855345	0.0103439	0.408291	GON4L	ADAM15, GLMP, GBAP1, SMG5, THBS3
14	q31.1	rs28479795	79443606:80443606	AED	6.01167e-11	0.0276737	0.00422894	1.63084e-08	0.0221073	0.00391457	0.0248714	CED	8.01597e-05	0.0253504	0.00642689	0.00263391	0.019868	0.00660572	0.0648755		0.0269717	0.00353275	2.26219e-14	0.0215253	0.00336766	1.63973e-10	NRXN3	NRXN3
19	p13.11	rs8109936	17888011:18888011	CED	6.30892e-11	-0.023487	0.00359312	0.000112063	-0.0128852	0.00333559	0.0146468		0.702421	-0.00225516	0.00590268	0.00884405	-0.0158162	0.00604097	0.0243186		-0.0177467	0.0030692	7.3737e-09	-0.01357	0.00292003	3.36434e-06	KIAA1683, JUND	IQCN, MAST3, LSM4, JUND
6	q16.1	rs9320823	97929337:98929337	CED	8.79953e-11	0.0229866	0.00354366	6.91355e-09	0.0190755	0.0032927	0.266105	AED	0.000370244	-0.019169	0.00538332	1.73421e-06	-0.026379	0.00551534	0.0643183		0.0102423	0.00295993	0.000539561	0.00713169	0.00282719	0.0116513	RP11-436D23.1
5	q14.3	rs7721843	86602792:87602792	SSE	8.85468e-11	-0.0308583	0.00475787	0.0900984	-0.00754643	0.00445246	7.08963e-05		0.0179883	0.0289604	0.0122403	0.639057	0.00587565	0.0125274	0.0415672		-0.0230065	0.00443463	2.12654e-07	-0.00604109	0.00419536	0.149883	CTD-2316B1.2, TMEM161B
16	p11.2	rs62037428	28508079:29508079	SSE	1.24314e-10	-0.0235686	0.00366291	2.76471e-07	-0.017451	0.00339579	0.00333446	AED	0.000158543	-0.0215267	0.00569828	0.000920588	-0.0193194	0.00582968	0.0103232		-0.0229716	0.00308123	8.96421e-14	-0.0179243	0.00293428	1.00501e-09	LAT, CTB-134H23.2	NPIPB15, EIF3CL, NFATC2IP, EIF3C, SH2B1, SBK1, TUFM, NUPR1, SPNS1, SGF29, SULT1A1, ATP2A1, SULT1A2, AC145285.4, CLN3
17	q24.2	rs55931203	65354602:66354602	CED	1.35934e-10	0.0280432	0.00436755	3.567e-09	0.0239302	0.00405363	0.161332		0.215174	0.00911947	0.00735745	0.000622389	0.0259569	0.00758546	0.0354065		0.0231123	0.00375567	7.55637e-10	0.0243804	0.00357516	9.14224e-12	BPTF	SH3GL1P3, BPTF, LRRC37A16P, SMURF2, LINC00674, AC145343.1
1	q25.2	rs490544	177391097:178391097	SSE	1.38449e-10	0.0259682	0.00404614	4.18812e-06	0.0172784	0.00375457	0.00224982		0.350627	0.00580627	0.00622064	0.00348308	-0.0186438	0.00638115	0.00303808		0.0199742	0.00339178	3.88549e-09	0.00804042	0.00323598	0.0129663	RP11-63B19.1, SEC16B
12	q24.31	rs58379261	121841560:122841560	SSE	1.45199e-10	-0.0243782	0.0038027	0.1151	-0.00554258	0.00351757	0.000274104		0.00119656	-0.0209794	0.00647515	0.00779452	-0.017803	0.0066904	0.136842		-0.0235066	0.00327905	7.57038e-13	-0.00819774	0.00311347	0.00846365	RP11-87C12.2	HPD, PSMD9, WDR66, MYOM2, LINC01089, BCL7A, MORN3, AC084018.1
3	p24.2	rs13067187	24577932:25577932	SSE	1.46132e-10	-0.0323731	0.00505059	0.0181014	-0.0110468	0.0046738	6.21448e-05		0.000158526	-0.0208037	0.00550688	0.896032	0.00073752	0.00564389	0.00280896		-0.0270875	0.00372218	3.40529e-13	-0.00625292	0.00359973	0.0823781	AC133680.1
9	p21.1	rs1412234	27910683:28910683	CED	1.54214e-10	0.023613	0.00368864	1.59059e-09	0.0207311	0.00343504	0.0523857	CED	0.0200643	0.0126295	0.00543145	0.000140592	0.021157	0.00555669	0.0486401		0.0201462	0.00305147	4.05311e-11	0.0208489	0.00292183	9.63984e-13	LINGO2
11	q24.1	rs10892918	122236207:123236207	SSE	1.92032e-10	-0.0222505	0.00349411	0.111481	-0.00516657	0.00324619	3.76923e-06		0.00456487	-0.0158989	0.00560525	0.609605	0.0029562	0.00578919	0.00964487		-0.0204731	0.00296518	5.03816e-12	-0.00322353	0.00283144	0.25492	CRTAM	CRTAM, JHY
16	q12.2	rs9302652	53365975:54365975	CED	2.7388e-10	-0.0246862	0.00391021	9.01761e-08	-0.0194986	0.00364753	0.331985	AED	0.00433017	0.0154762	0.00542407	0.823679	0.00124345	0.00558058	0.0189603		-0.0109517	0.00317192	0.000554981	-0.0132899	0.0030532	1.34432e-05	FTO	FTO
4	p15.31	rs6844623	17889149:18889149	CED	3.23805e-10	0.0218746	0.00347917	5.84513e-07	0.0161835	0.00323902	0.0176293	CED	1.45126e-07	0.0305646	0.005811	0.134097	0.0089489	0.00597323	0.00274495		0.0241677	0.00298505	5.66785e-16	0.0145396	0.00284734	3.28392e-07	LCORL, RP11-608B3.1
15	q24.1	rs4776613	72580731:73580731	CED	3.68091e-10	0.0232651	0.0037121	2.55056e-06	0.0161926	0.00344217	0.0313895		0.0783533	-0.00967621	0.00549667	1.45805e-06	-0.0270543	0.00561572	0.0025706		0.0129471	0.00307629	2.56877e-05	0.00438174	0.00293473	0.135421	ADPGK-AS1	ADPGK, BBS4, MYO9A
3	q27.1	rs6797004	182863270:183863270	SSE	3.78412e-10	-0.025168	0.00401848	0.0261166	-0.00826554	0.0037157	0.000789953		0.0141156	-0.0158322	0.00645044	0.881935	0.000984337	0.00662773	0.0313522		-0.0225578	0.00341076	3.748e-11	-0.00605351	0.0032411	0.0617994	KLHL24	YEATS2, KLHL24, KLHL6, ABCC5
11	p14.1	rs6265	27179916:28179916	CED	4.35258e-10	0.0232482	0.00372496	8.45026e-20	0.031469	0.003455	0.0291756	SSE_Male	0.000174118	-0.0257626	0.00686215	0.0826558	-0.01232	0.00709873	0.00141805		0.0120935	0.00327374	0.000220673	0.0230827	0.00310659	1.08402e-13	BDNF	BDNF-AS, LGR4, BDNF
8	q21.11	rs2926614	75801610:76801610	CED	4.73262e-10	0.0281339	0.00451725	6.2522e-06	0.0189756	0.00420018	0.0328929		0.0160429	-0.0140242	0.00582384	0.150647	-0.00856536	0.00595943	0.0688041		0.0122978	0.00356938	0.000570304	0.00983531	0.00343317	0.00417285	PKMP4, HNF4G
7	p15.2	rs9770544	26732126:27732126	CED	4.75541e-10	-0.0368807	0.00592237	0.0358724	-0.0115088	0.00548461	0.00167088		0.0693419	0.0209061	0.0115106	0.000621548	0.041106	0.0120112	0.00796584		-0.0247851	0.0052662	2.52072e-06	-0.00243106	0.00498909	0.626063	RP1-170O19.14	HOXA5, HOXA4, HOXA9, HOTAIRM1, SKAP2, HOXA6
3	p12.1	rs62261725	85398626:86398626	CED	4.77449e-10	-0.0230498	0.00370175	7.67467e-06	-0.0153484	0.00343044	0.0338854		0.570009	0.00333804	0.00587637	0.00117035	0.0195406	0.00601947	0.0046705		-0.0155533	0.00313211	6.84315e-07	-0.00679518	0.00298043	0.0226115	CADM2	CADM2
5	q14.3	rs2112424	87394646:88394646	SSE	6.33332e-10	-0.0242206	0.00391774	0.23656	-0.00431956	0.0036494	0.000201646		0.0152173	0.0241812	0.00996223	0.00788481	0.0272676	0.0102622	0.0255456		-0.0177377	0.00364594	1.14424e-06	-0.000773421	0.00343845	0.822032	LINC00461	TMEM161B-AS1
11	p11.2	rs34942378	46596981:47596981	SSE	6.53579e-10	-0.0470014	0.00760872	0.197088	-0.00902768	0.00699876	0.000239532	SSE_Male	6.20103e-05	-0.0343271	0.00856988	0.0416273	-0.018031	0.00885049	0.0593752	SSE	-0.0414146	0.00568978	3.36883e-13	-0.0124916	0.00548973	0.0228788	C11orf49	MADD, SPI1
20	q13.13	rs71351952	47023789:48023789	CED	7.14785e-10	-0.0230739	0.00374385	5.98252e-05	-0.0139958	0.00348711	0.0231343	SSE_Male	4.84655e-06	-0.0285668	0.0062481	0.0242438	-0.014371	0.00637768	0.00378838		-0.024525	0.00321146	2.22814e-14	-0.0140822	0.00305963	4.17308e-06	PREX1, ARFGEF2	ZNFX1, ARFGEF2, PREX1, CSE1L, ZFAS1, KCNB1
1	p33	rs6700838	47200027:48200027	CED	9.15296e-10	-0.0215474	0.00351859	9.62001e-07	-0.0160232	0.00327043	0.0897611		0.518458	0.0035015	0.00542254	0.00071205	0.0188338	0.00556364	0.00243504		-0.0141256	0.00295165	1.70431e-06	-0.00707189	0.0028194	0.0121317	TAL1, STIL	LINC00853, PDZK1IP1, TAL1
3	q25.31	rs13322435	156295468:157295468	SSE	9.23958e-10	-0.0217841	0.0035581	0.793905	0.000863464	0.0033052	2.38839e-06	SSE_Male	0.0119474	-0.0138179	0.00549673	0.513617	-0.00369554	0.00565741	0.011535	SSE	-0.0194318	0.00298693	7.7378e-11	-0.000296643	0.00285385	0.917213	LEKR1, LINC00880	TIPARP, AC092944.1
19	p13.11	rs113230003	17960956:18960956	CED	9.36668e-10	-0.0243563	0.00397966	9.21103e-09	-0.021212	0.00369232	0.419904	AED	0.804578	-0.00153469	0.00620253	6.96957e-05	-0.0252623	0.00635092	0.00376043		-0.017701	0.00334949	1.25915e-07	-0.0222352	0.00319205	3.26559e-12	PGPEP1	PGPEP1
5	q11.2	rs157845	55296639:56296639	SSE	9.4744e-10	-0.0256301	0.00418904	0.340556	-0.00371579	0.00389876	5.14301e-07		0.0086336	0.0314974	0.0119926	0.0217712	-0.0283503	0.0123562	0.000254805		-0.0194178	0.00395472	9.10579e-07	-0.00594632	0.00371807	0.109753	CTC-236F12.4, AC022431.1	RPL26P19
8	q24.13	rs2980888	126007308:127007308	CED	9.72066e-10	0.023088	0.00377608	0.00170008	0.0110373	0.00351705	0.0195286		0.991249	-6.19214e-05	0.0056457	0.000602527	-0.0198362	0.00578189	0.00556199		0.0159328	0.00313873	3.85097e-07	0.00269898	0.0030048	0.369067	RP11-136O12.2
5	q11.2	rs255755	52807772:53807772	SSE	1.02828e-09	-0.0239712	0.00392628	0.164897	-0.00506263	0.00364535	0.000416699		0.00510289	-0.0186885	0.00667291	0.745527	0.00220657	0.00679895	0.00442894		-0.0226126	0.00338396	2.35232e-11	-0.00343954	0.0032127	0.284347	ARL15	ARL15
17	q21.31	rs9911991	41778916:42778916	CED	1.03434e-09	0.0251442	0.00411905	1.63044e-06	0.0183073	0.00381823	0.00501989		0.342788	0.0100732	0.010618	0.00456684	0.0308302	0.0108701	0.0149077		0.0231728	0.00384022	1.59699e-09	0.0196827	0.00360245	4.66308e-08	CTB-175E5.7	TMUB2, ASB16-AS1, C17orf53, SLC4A1, G6PC3, UBTF, HDAC5, ASB16
6	p21.31	rs732594	34706553:35706553	CED	1.12012e-09	-0.0213105	0.00349832	2.94235e-13	-0.0237173	0.00325005	0.0244781		0.029827	-0.0136858	0.00629965	0.00292258	-0.0191822	0.00644575	0.12174		-0.0195134	0.00305839	1.76758e-10	-0.022798	0.00290202	3.96875e-15	SCUBE3	UHRF1BP1, SNRPC, DEF6, ZNF76, SCUBE3, C6orf106
11	p11.2	rs60572790	43192383:44192383	CED	1.20476e-09	0.0227803	0.00374678	3.68221e-13	0.0253581	0.00348935	0.0405246		0.370819	0.0049362	0.0055156	0.000361309	0.0201284	0.00564272	0.0171602		0.017146	0.00309931	3.16243e-08	0.0239115	0.00296776	7.81365e-16	HSD17B12	AC087521.2, HSD17B12
6	q22.32	rs2184968	126260994:127260994	CED	1.63267e-09	-0.0209665	0.00347643	0.000225947	-0.0119411	0.0032377	0.012201	CED	0.000695272	0.0182863	0.00539138	2.9976e-05	0.0230417	0.00552014	0.0244572		-0.00943885	0.0029217	0.00123529	-0.00298695	0.00279277	0.284832	CENPW, MIR588	CENPW
16	q12.2	rs6499640	53269677:54269677	CED	1.69284e-09	0.0213876	0.0035497	2.09826e-10	0.0209794	0.00330159	0.0741115	AED	0.000745355	-0.0185737	0.00550717	6.88235e-05	-0.0225483	0.00566437	0.0534818		0.00965838	0.00298362	0.00120736	0.00994143	0.00285242	0.000491653	FTO	RBL2
6	p22.2	rs1535274	26020747:27020747	CED	1.78715e-09	0.0217896	0.00362171	5.4367e-05	0.0135723	0.00336271	0.0255513		0.309855	-0.00570118	0.00561393	0.00452899	-0.0163451	0.00575753	0.0450729		0.0137106	0.00304336	6.63452e-06	0.00596268	0.00290373	0.0400281	RNU6-502P, HCG11	ZNF204P, HMGN4, BTN2A3P, BTN3A2, HIST1H4H, ABT1, HCG11, BTN3A1, ZNF322P1, HIST1H2BK, BTN2A1, LINC00240, ZNF322, GUSBP2, AL513548.1
16	p13.3	rs879620	3515729:4515729	CED	2.06828e-09	0.0214138	0.00357332	1.34979e-13	0.024594	0.00332274	0.0710733		0.000474456	-0.0318363	0.00910876	0.0246063	-0.0208188	0.00926265	0.0980248		0.0143118	0.00332651	1.68993e-05	0.0194164	0.00312759	5.36304e-10	ADCY9	HOMER1, ADCY9
14	q13.1	rs17522122	32802882:33802882	CED	2.23037e-09	-0.0208745	0.00349049	8.35054e-06	-0.0144639	0.00324586	0.0554674		0.071535	0.00975232	0.00541157	0.000680961	0.0188223	0.00554024	0.0527229		-0.0118763	0.00293326	5.14702e-05	-0.00595816	0.00280061	0.0333824	AKAP6, NPAS3
2	q24.3	rs517701	164767386:165767386	CED	2.34301e-09	0.0217274	0.00363798	0.00491659	0.0095132	0.00338249	0.0134801		0.485647	0.00376188	0.00539525	4.42097e-05	0.0225273	0.005515	0.00318124		0.0161121	0.00301632	9.21104e-08	0.0130705	0.00288337	5.81321e-06	AC092684.1, AC110086.1
11	p11.2	rs10838613	46211778:47211778	SSE	2.39574e-09	-0.0285879	0.0047896	0.281149	-0.00478744	0.00444209	6.40052e-05		0.017085	0.0214564	0.00899641	0.396814	0.00792957	0.00935826	0.0438611		-0.0175359	0.00422777	3.3569e-05	-0.00244902	0.00401295	0.541677	ARHGAP1	ATG13, CKAP5, C11orf49, NR1H3, ARFGAP2, MADD, HARBI1, C1QTNF4, DDB2, SPI1
3	p21.31	rs7635641	48796069:49796069	CED	2.57048e-09	0.0210297	0.0035301	0.000153229	0.0123784	0.00326965	0.04635		0.000833012	-0.0180582	0.00540358	0.228207	-0.00666031	0.00552719	0.0478473		0.00933756	0.00295534	0.00158011	0.00744306	0.00281413	0.00817173	CCDC36, RP11-3B7.1	MON1A, APEH, WDR6, AMT, USP19, DALRD3, UBA7, QRICH1, USP4, ATRIP, CCDC36, ARIH2, P4HTM, KLHDC8B, NICN1, NCKIPSD, RBM6
16	q22.1	rs9302605	69472486:70472486	CED	2.87164e-09	0.0205871	0.00346637	4.24722e-05	0.0132113	0.00322723	0.107469		0.00130703	-0.0478722	0.0148916	0.754176	-0.00467064	0.0149155	0.00829672		0.0170684	0.00337611	4.28959e-07	0.0124116	0.00315424	8.32345e-05	WWP2	NPIPB14P, CLEC18C, CLEC18A, MIR140, PDXDC2P, SMG1P7, AC009022.1, WWP2, EXOSC6, AARS, COG4
17	q21.32	rs11079849	46590785:47590785	CED	2.91643e-09	-0.0219549	0.00369824	6.95895e-11	-0.0223939	0.00343364	0.085967	CED	0.072763	-0.010296	0.00573793	0.00302938	-0.0174828	0.00589657	0.0579073		-0.0185331	0.00310852	2.49114e-09	-0.0211503	0.00296722	1.01857e-12	RP11-501C14.6	SNF8, CALCOCO2, IGF2BP1, GIP, HOXB2, UBE2Z, ATP5MC1
16	q12.2	rs62033401	53314470:54314470	SSE	3.4813e-09	-0.0291824	0.00493994	0.000349968	-0.0163458	0.00457191	0.0269254	SSE_Male	2.54177e-05	-0.0338813	0.00804466	0.735025	-0.00276487	0.00816918	0.00157287	SSE	-0.0304691	0.00420962	4.55476e-13	-0.0131066	0.00398961	0.00101912	FTO	RBL2
6	q14.1	rs2874881	80768676:81768676	SSE	3.53699e-09	-0.034518	0.00584573	0.130806	-0.00819516	0.00542388	0.000436481		0.828789	-0.00346947	0.0160433	0.0382994	0.0341948	0.0165057	0.0152809		-0.0308789	0.00549248	1.88718e-08	-0.0040639	0.0051528	0.430301	RP11-486E2.1, FAM46A
10	q24.31	rs41310284	101947647:102947647	CED	3.56711e-09	-0.0341029	0.00577679	1.04108e-07	-0.02842	0.00534249	0.0566389	AED	0.0121891	-0.0135757	0.00541564	0.486915	-0.00386004	0.00555218	0.0266302		-0.0231776	0.00395095	4.45491e-09	-0.0166126	0.00384971	1.59404e-05	HIF1AN, PAX2	HIF1AN, SEC31B, CWF19L1
3	q21.1	rs12330631	122589834:123589834	CED	3.78286e-09	-0.02142	0.00363436	0.00151702	-0.0107138	0.00337818	0.0195906		0.0434901	0.0110505	0.0054731	0.00288039	0.0167196	0.00560986	0.100184		-0.0114836	0.00302764	0.000148883	-0.00341311	0.00289397	0.238244	ADCY5	ADCY5, SEC22A
19	q12	rs57894940	29793462:30793462	CED	4.06637e-09	0.0219852	0.00373784	3.39658e-07	0.0176546	0.00346157	0.0140547		0.00531927	0.0153187	0.00549603	0.0341043	0.0119437	0.00563674	0.0616389		0.0198769	0.00309078	1.26742e-10	0.0160907	0.00294975	4.89959e-08	C19orf12, CCNE1	CCNE1, C19orf12
12	q24.31	rs2458402	121645773:122645773	SSE	4.27643e-09	0.0209499	0.00356688	0.124818	0.00508097	0.00331037	0.00111034		0.0030766	0.0870057	0.0293918	0.250476	0.035837	0.031184	0.0186335		0.0219086	0.0035409	6.12046e-10	0.0054237	0.00329187	0.0994342	MORN3, TMEM120B	TMEM120B, WDR66, MORN3, ORAI1, AC084018.1
13	q32.2	rs7139583	98613230:99613230	CED	4.36642e-09	-0.0225374	0.00383942	2.84353e-05	-0.0149718	0.00357685	0.0823355	CED	1.37127e-05	0.0243185	0.00559164	0.162059	0.00801372	0.00573142	0.0155504		-0.00752445	0.00316512	0.0174398	-0.0085289	0.00303442	0.0049431	STK24	STK24, FARP1-AS1, FARP1
19	q13.32	rs10423928	45682304:46682304	CED	4.49474e-09	-0.0256778	0.00437799	5.53803e-14	-0.0305832	0.00406738	0.11393	AED	0.0240758	-0.0158567	0.00702859	0.0022309	-0.0220008	0.00719491	0.0289408		-0.0229325	0.00371606	6.77782e-10	-0.0285047	0.00354076	8.25003e-16	GIPR	SNRPD2, VASP, GIPR
14	q23.2	rs79733879	62569469:63569469	SSE	4.49597e-09	0.0325108	0.00554305	0.414159	0.00420389	0.00514806	0.000182657		0.0852818	-0.0136007	0.00790333	0.379838	0.00708446	0.00806699	0.0335034		0.0173072	0.00453815	0.000136896	0.00503751	0.00433968	0.245722	RP11-395B20.2, RP11-395B20.1
13	q14.11	rs75983170	40288838:41288838	CED	4.50423e-09	0.0217099	0.00370171	0.0109153	0.00874311	0.00343484	0.00574633		7.94464e-05	0.0379758	0.00962249	0.661216	0.00435587	0.0099395	0.00754528		0.0238068	0.00345488	5.54968e-12	0.00827507	0.00324646	0.0108046	LINC00332, RPL17P51
16	q22.3	rs7498798	72597029:73597029	SSE	4.67447e-09	-0.0212593	0.00362868	0.000915128	-0.0111744	0.00337041	0.0014095		0.650423	-0.00325355	0.0071794	0.00948738	-0.0190454	0.00734185	0.0523751		-0.0175955	0.00323853	5.53565e-08	-0.0125444	0.00306307	4.21471e-05	RP11-346C20.3, HCCAT5	ZFHX3
20	p12.3	rs2145270	6121685:7121685	CED	4.94571e-09	0.0210417	0.00359731	1.3289e-06	0.0161004	0.0033296	0.0773896		0.324877	0.00531476	0.00539843	0.000565211	0.0190512	0.00552521	0.00515659		0.0162057	0.00299356	6.17993e-08	0.0168865	0.00285181	3.19337e-09	CASC20, RP5-859D4.3
11	p11.2	rs11039154	46778502:47778502	CED	5.02405e-09	-0.0226586	0.00387545	0.00224427	-0.0109717	0.00359037	0.0248334	AED	0.00540638	-0.0212918	0.00765353	0.000526722	-0.0274964	0.00793077	0.027838		-0.0223797	0.00345747	9.61694e-11	-0.0137824	0.00327081	2.51155e-05	NR1H3	ARHGAP1, NUP160, MYBPC3, ACP2, C1QTNF4, MADD, MTCH2, PSMC3, SPI1, AC090559.1, FNBP4
8	p21.2	rs11781222	22889571:23889571	SSE	5.07635e-09	-0.0294327	0.00503557	0.00679876	-0.0126968	0.00469109	8.63198e-05		0.452541	0.00944868	0.0125782	0.000309674	-0.0467006	0.0129459	0.000933096		-0.0240619	0.00467486	2.64575e-07	-0.0166435	0.00441046	0.000160885	SLC25A37	NKX3-1, SLC25A37, LOXL2
7	p14.3	rs1653892	31899469:32899469	SSE	5.57361e-09	0.0323435	0.00554836	0.58339	0.00284248	0.00518284	0.000102101		0.0022163	0.0294333	0.00961921	0.172721	0.0133614	0.00979909	0.110324		0.031617	0.00480617	4.75464e-11	0.00514186	0.00458148	0.261729	PDE1C, AC018641.7	PPP1R17, PDE1C
12	q24.31	rs3897102	122992112:123992112	CED	5.62255e-09	-0.0204819	0.00351444	0.00015449	-0.0123303	0.0032587	0.0232512		0.0699558	0.0103047	0.00568612	0.818663	0.00134257	0.00585595	0.0488675		-0.0119719	0.00298951	6.21119e-05	-0.00909739	0.0028475	0.00139895	PITPNM2	ABCB9, DENR, PITPNM2, ARL6IP4, OGFOD2, RILPL2, KMT5A, MPHOSPH9, C12orf65, CDK2AP1, SRSF6, HNRNPLL, DDX55, ALDH4A1, HNRNPH1
10	q23.2	rs10887578	87596047:88596047	CED	5.76386e-09	0.0202849	0.00348311	0.00676677	0.00877142	0.00323891	0.00271496		0.380924	0.00737625	0.0084184	0.00450665	-0.0242541	0.0085387	0.00138667		0.0183981	0.0032185	1.08836e-08	0.00461727	0.00302836	0.12734	GRID1	GRID1
2	p23.3	rs2384463	26442256:27442256	CED	6.00273e-09	-0.0201677	0.00346703	0.00142451	-0.0102708	0.00322001	0.0319904	CED	0.388887	0.00540171	0.00626904	0.00101497	0.021415	0.0065159	0.011073		-0.0141789	0.00303396	2.96264e-06	-0.00405158	0.00288676	0.160466	KCNK3	KHK, SLC35F6, MAPRE3, DPYSL5, ATRAID, KCNK3
12	q24.31	rs77909495	123823592:124823592	CED	6.41785e-09	0.0358045	0.00616703	2.496e-05	0.0242961	0.00576385	0.0880134		0.00659413	0.0222481	0.00818892	0.191456	0.0110012	0.00842159	0.036337		0.0308984	0.0049263	3.5611e-10	0.0200551	0.0047565	2.48285e-05	DNAH10	ZNF664, DDX55, CCDC92, EIF2B1
6	p21.33	rs644045	31383957:32383957	CED	6.55018e-09	0.0223138	0.00384564	1.47672e-11	0.024133	0.00357495	0.00976769	SSE_Female	0.10218	-0.015186	0.00929138	3.3939e-05	-0.0396085	0.00955404	0.0208371		0.0168293	0.00355331	2.1772e-06	0.0163045	0.00334823	1.11831e-06	C2	FAM8A1, ATF6B, HLA-DQA1, STK19B, ATP6V1G2, HLA-DRB5, HLA-S, GALNT2, TCF19, HLA-DQB1-AS1, HSPA1B, HCG27, AIF1, POU5F1, HLA-C, HCP5, LTA, TNXA, CSNK2B, LY6G5B, CYP21A1P, PSORS1C3, SLC44A4, PRRT1, TNXB, HLA-DQB1, BAG6, HLA-DRA, DDAH2, HLA-DRB1, TMEM154, C4B, HLA-DQB2, DXO, TSBP1, PRRC2A, HLA-DQA2, CYP21A2, PBX2, NCR3, NOTCH4, LY6G5C, VARS2, HLA-B, TAP2, SKIV2L, HLA-DRB6
18	q21.32	rs73455626	57442192:58442192	CED	6.94149e-09	0.0218846	0.003778	1.02173e-17	0.0300543	0.00350598	0.019441	CED	7.43385e-05	0.0232044	0.00585605	0.00045936	0.0209774	0.00598725	0.0409541		0.0222725	0.00317466	2.2881e-12	0.0277366	0.00302544	4.82778e-20	RP11-795H16.2, RP11-396N11.1	AC090621.1
4	q28.3	rs4241964	136553959:137553959	CED	7.09895e-09	-0.0202748	0.00350237	5.16738e-06	-0.0148558	0.00325927	0.0222508		0.0221428	0.0200317	0.00875506	0.645302	0.00407969	0.00886309	0.0151308		-0.0147143	0.00325182	6.04105e-06	-0.0126002	0.00305899	3.80413e-05	RP11-775H9.1
1	q41	rs6699778	214753661:215753661	SSE	7.80516e-09	-0.0235931	0.00408686	0.179132	-0.00512167	0.00381236	6.28786e-05	AED	0.00109793	0.0174666	0.00535056	0.0330751	0.0117405	0.00550875	0.0372901		-0.00846443	0.00324782	0.00915559	0.000338981	0.00313486	0.913891	KCNK2
16	q12.2	rs79226694	53328899:54328899	CED	1.10599e-08	0.0622387	0.0108925	1.82487e-06	0.0484379	0.0101503	0.353964		0.024523	0.0275648	0.0122568	0.890953	0.00170674	0.012449	0.0694197		0.0469382	0.00814196	8.16706e-09	0.0297769	0.0078668	0.000153624	FTO	RBL2
3	q13.13	rs55689442	107619528:108619528	CED	1.20028e-08	0.0198028	0.00347419	0.00687526	0.00871653	0.00322493	0.00558669		0.185524	0.00740281	0.0055914	0.000423236	0.020235	0.0057397	0.0130084		0.016349	0.00295094	3.02045e-08	0.0114803	0.00281153	4.44026e-05	MYH15	CD47, DZIP3, HHLA2, CIP2A, MYH15, TRAT1, IFT57
18	p11.22	rs62086105	8963671:9963671	SSE	1.27851e-08	-0.0513333	0.00902294	0.519359	-0.00535824	0.00831591	0.000179131		0.233902	0.0105324	0.00884788	0.00319099	-0.0268695	0.00911173	0.0016155		-0.0197945	0.00631738	0.00172831	-0.0151336	0.00614235	0.0137467	TWSG1, RP11-61L19.2	TWSG1, RALBP1
3	q25.31	rs7610493	155813067:156813067	CED	1.29455e-08	-0.0276409	0.00486031	0.00376096	-0.013068	0.00450998	0.024159		0.00226271	-0.0164768	0.0053958	0.378987	-0.00488324	0.00555056	0.0406756		-0.0226402	0.00361128	3.62691e-10	-0.00981322	0.00350021	0.00505343	SSR3, TIPARP-AS1	TIPARP-AS1
3	q29	rs6782581	196479106:197479106	SSE	1.35537e-08	-0.0198019	0.00348673	0.0322939	-0.00694699	0.00324509	0.00252642	AED	0.00273985	-0.0179741	0.00599989	0.462118	-0.00451951	0.0061459	0.0248853		-0.0193405	0.00301465	1.40365e-10	-0.00641777	0.00286963	0.0253229	DLG1	DLG1
19	p13.11	rs2045387	17700586:18700586	CED	1.44255e-08	-0.0229081	0.00404127	0.0951236	-0.00625806	0.00374964	0.00252594		0.49098	-0.00612914	0.0088988	0.00372055	-0.0265208	0.00914166	0.00975853		-0.0200393	0.0036796	5.1503e-08	-0.00917613	0.00346915	0.0081676	IL12RB1	IQCN, MPV17L2, IL12RB1, MAST3
2	q24.3	rs6717858	165039661:166039661	CED	1.65381e-08	0.0199692	0.00353745	1.87497e-14	0.0251689	0.00328596	0.019087		0.022671	-0.0131815	0.00578381	0.242005	-0.00689398	0.00589225	0.0694068		0.0109444	0.00301777	0.00028711	0.0175628	0.00286986	9.37261e-10	COBLL1	SLC38A11
4	q21.21	rs35851183	80217182:81217182	CED	1.75705e-08	0.0203507	0.0036117	7.84641e-06	0.0150264	0.00336202	0.100048		0.02926	0.0118803	0.00544954	0.806659	-0.00136438	0.00557481	0.0131105		0.0177656	0.00301054	3.61008e-09	0.010655	0.002879	0.000214805	RP11-452C8.1, PCAT4	ANTXR2
9	q33.3	rs10987401	128930771:129930771	CED	1.78185e-08	0.0209821	0.00372536	0.00152395	0.0109858	0.0034654	0.0494492		0.0044499	0.0152169	0.00534946	0.0993637	0.00907827	0.00550871	0.0539512		0.0190993	0.0030571	4.17027e-10	0.010445	0.00293327	0.000369642	LMX1B	LMX1B
5	q23.3	rs7703313	127328980:128328980	SSE	1.85965e-08	-0.0318185	0.00565676	0.0237295	-0.011909	0.00526596	0.000999032		0.00601989	-0.0149336	0.00543656	0.93039	-0.000489311	0.00560141	0.0321255		-0.023041	0.00391976	4.14837e-09	-0.00655132	0.00383671	0.0877223	FBN2	FBN2
6	p21.1	rs998584	43257896:44257896	CED	1.86167e-08	-0.0195259	0.00347148	1.23531e-05	-0.014121	0.00323034	0.07671	SSE_Male	7.95236e-06	-0.0240376	0.00538094	0.84078	-0.00110797	0.00551512	0.000918433		-0.0208518	0.0029171	8.79545e-13	-0.010797	0.00278739	0.000107284	VEGFA, RP11-344J7.2
1	p36.23	rs301806	7982078:8982078	SSE	1.92219e-08	-0.0251864	0.00448224	0.199834	-0.005316	0.00414655	0.000551704		0.21794	-0.0082586	0.00670315	0.00973051	0.0177808	0.00687744	0.00335011		-0.0199561	0.00372599	8.51207e-08	0.000841617	0.00355105	0.812653	RERE	RERE, ENO1, RERE-AS1
15	q22.33	rs12901071	66870389:67870389	CED	2.14283e-08	0.0207386	0.00370311	0.00640499	0.00937266	0.00343784	0.0244876		0.0061629	0.0236296	0.00862656	0.292475	0.00936716	0.00889805	0.0464846		0.0211884	0.00340284	4.76363e-10	0.00937195	0.00320682	0.00347225	SMAD3	SMAD3
9	p22.3	rs7870380	16063730:17063730	CED	2.1683e-08	-0.0399871	0.00714274	0.000359855	-0.0236774	0.00663612	0.0943589		0.232996	-0.0140088	0.0117455	0.002871	-0.0356929	0.0119718	0.00440136		-0.0329736	0.00610286	6.55455e-08	-0.0265016	0.00580407	4.97053e-06	BNC2	TCF7L1
22	q13.1	rs17752670	37782897:38782897	CED	2.28593e-08	-0.0237456	0.00424855	0.00195192	-0.012228	0.00394771	0.0221865	AED	3.9468e-05	0.022882	0.00556585	0.0508195	0.0110848	0.00567564	0.0117351		-0.00657946	0.00337712	0.0513855	-0.00462681	0.00324085	0.153391	EIF3L	PLA2G6, GCAT, ANKRD54, PICK1, LGALS2, H1F0, TRIOBP, TMEM184B, CDC42EP1, SH3BP1
11	p15.2	rs11823635	12849479:13849479	CED	2.35265e-08	0.0199101	0.00356549	1.38755e-06	0.015994	0.00331348	0.0730504		0.000302514	-0.0196119	0.00542737	0.223343	-0.00676691	0.0055571	0.00151893		0.00799539	0.00297997	0.0072955	0.0100243	0.00284597	0.000427864	ARNTL	ARNTL
17	p13.1	rs8076642	6883984:7883984	CED	2.36171e-08	0.0197724	0.00354125	6.78095e-05	0.0130897	0.00328562	0.0542235	AED	0.000419644	-0.0195115	0.00553081	0.689765	-0.00226667	0.00567836	0.00193372		0.00835032	0.00298232	0.00511117	0.00923793	0.00284386	0.00116067	ZBTB4	CHRNB1, FGF11, POLR2A, CD68, TNFSF12, ZBTB4, TNFSF13, MPDU1
12	q24.31	rs6488898	123703832:124703832	CED	2.47283e-08	0.0369897	0.00663439	1.9496e-05	0.026091	0.00610931	0.023635		0.878799	-0.00128612	0.00843396	0.0630525	-0.0160633	0.00864143	0.0938053		0.0223587	0.00521443	1.80411e-05	0.012043	0.00498853	0.0157729	ATP6V0A2	TCTN2, HCAR3, RILPL2, DDX55
19	p13.3	rs7246182	4647735:5647735	CED	2.5083e-08	-0.0233006	0.00418101	0.00310001	-0.0114998	0.0038881	0.0387456		0.00251801	-0.0217919	0.00721251	0.275551	-0.00808593	0.00741568	0.0108183		-0.0229211	0.00361719	2.3471e-10	-0.0107637	0.0034435	0.00177321	KDM4B	KDM4B
12	q24.31	rs11058603	122516781:123516781	CED	2.55879e-08	0.0358224	0.0064319	0.00138247	0.019024	0.00594811	0.0229753		0.583498	-0.00362798	0.00661693	1.60095e-05	-0.0294539	0.00682617	0.000700916		0.0166565	0.00461207	0.000304427	-0.00189842	0.00448447	0.672054	KNTC1	RSRC2, KNTC1
12	q24.23	rs9805009	117905172:118905172	CED	3.05386e-08	-0.021194	0.0038266	0.00318077	-0.0104842	0.00355427	0.0017185		0.00857614	-0.014442	0.00549405	0.418904	-0.00456438	0.00564667	0.00181532		-0.0189885	0.00314003	1.47362e-09	-0.00880433	0.00300799	0.00342271	KSR2	KSR2, VSIG10
1	q32.1	rs2678204	201300511:202300511	CED	3.10699e-08	0.0202488	0.00365795	3.56583e-10	0.0212869	0.00339381	0.148508		0.912752	-0.000594945	0.00542989	0.0174927	-0.013181	0.00554692	0.0253214		0.0137422	0.00303376	5.90522e-06	0.0118985	0.00289494	3.95473e-05	IPO9	SHISA4, LMOD1, RNPEP, IPO9, AL513217.1
7		rs6970803	112505734:113505734	CED	3.1302e-08	0.0203901	0.00368433	0.00462669	0.00968023	0.0034182	0.0154213		2.89278e-06	0.0264702	0.0056571	0.0125725	0.0145444	0.00582764	0.0358626		0.0222009	0.0030873	6.42951e-13	0.0109253	0.00294843	0.000210998
7	p14.1	rs17171504	38520328:39520328	CED	3.20197e-08	-0.0309153	0.00559018	0.00174883	-0.0163932	0.00523758	0.0126412	SSE_Male	0.000285666	-0.0318467	0.00877716	0.63455	-0.00429908	0.00904431	0.00752864		-0.0311841	0.00471507	3.74824e-11	-0.0133559	0.00453244	0.00321143	POU6F2
5	q13.3	rs2307111	74503678:75503678	CED	3.33631e-08	-0.0196301	0.0035542	7.67974e-16	-0.0265609	0.00329544	0.00866843	SSE_Female	0.343758	-0.00528945	0.00558678	2.33314e-10	-0.0365391	0.00576398	4.95099e-05		-0.0154983	0.00299879	2.36375e-07	-0.029019	0.00286087	3.54465e-24	POC5	POC5, COL4A3BP, HMGCR, ANKDD1B
11	p11.2	rs11039204	46886552:47886552	CED	3.46459e-08	0.061938	0.0112279	0.000133863	0.0398595	0.0104363	0.0886606		0.0022126	0.0615548	0.0201136	0.882608	0.00301581	0.0204234	0.0205664		0.061847	0.00980382	2.81838e-10	0.0322309	0.00929327	0.000523961	SPI1
11	p11.2	rs181678666	45850248:46850248	SSE	3.8311e-08	0.0585105	0.0106407	0.0910575	0.0167869	0.00993396	0.00415418		0.0495558	0.0624381	0.0317937	0.888304	-0.00444772	0.0316673	0.0680422		0.0589061	0.0100906	5.29142e-09	0.0148845	0.00947853	0.116337	CREB3L1, DGKZ
8	q21.3	rs74387907	92646876:93646876	SSE	3.83153e-08	0.0370623	0.00674018	0.35906	0.00574277	0.00626147	0.000663153		0.140287	0.0224969	0.0152547	0.0581088	-0.0291583	0.0153875	0.00451913		0.0346832	0.00616519	1.84809e-08	0.000784708	0.00579969	0.892373	RUNX1T1, RP11-777J24.1
17	q21.2	rs7501974	38758773:39758773	SSE	4.35932e-08	-0.0214716	0.00392111	0.544125	-0.00220945	0.00364243	0.000319258		0.551891	-0.00318011	0.00534531	0.00693021	0.014965	0.00554196	0.0092217		-0.0150723	0.00316166	1.86798e-06	0.00297143	0.00304385	0.328961	KRTAP4-16P, KRTAP4-9	KRTAP4-7, KRT36, KRTAP2-4, KRTAP2-1, KRTAP4-6, KRTAP4-5, KRT23
3	p25.2	rs2596902	12455982:13455982	SSE	4.37833e-08	-0.0203711	0.00372066	0.0053804	-0.00964935	0.00346679	0.00404497	SSE_Male	0.00142208	0.0203065	0.00636489	0.478806	0.00464382	0.00655694	0.000757772	SSE	-0.0100112	0.00321211	0.00182881	-0.00652668	0.00306478	0.0332067	IQSEC1	RPL32
3	p21.31	rs9843653	49420571:50420571	CED	4.54077e-08	0.0189652	0.00346797	5.17968e-18	0.027866	0.00322142	0.0327075	AED	0.0568318	0.0104982	0.00551181	1.04012e-05	0.0248944	0.00564601	0.000518783		0.0165639	0.00293529	1.67095e-08	0.0271362	0.00279802	3.06345e-22	ACTBP13, MST1R	APEH, ACTBP13, GMPPB, SLC38A3, RNF123, CRBN, MST1R, INKA1, IP6K1, HYAL3, USP4, GPX1, RBM5, DCUN1D1, MAPKAPK3, RBM6, CAMKV, MON1A, WDR6, HEMK1, ROR2, P4HTM, KLHDC8B, WDR53, UBA7, MAP3K13
17	q25.1	rs55823223	73390363:74390363	CED	4.58047e-08	0.0267001	0.00488375	0.00489866	0.0128409	0.00456376	0.0205555		0.412527	0.00518685	0.00632956	0.00457657	0.0184537	0.00650794	0.0494637		0.018672	0.00386659	1.37181e-06	0.0146912	0.00373656	8.4335e-05	TRIM65	TRIM65, EVPL, UNC13D, GALK1, ACOX1, WBP2, AC087289.1, FBF1, TEN1-CDK3, H3F3B, AC087289.6
4	q22.1	rs57400569	89252276:90252276	CED	4.65014e-08	0.0231209	0.00423115	0.00194388	0.0121931	0.00393489	0.0236411	AED	0.000314567	0.0235947	0.00654793	0.0480695	0.0132063	0.00668061	0.00670116		0.0232605	0.00355377	5.93786e-11	0.0124541	0.00339048	0.000239489	FAM13A	FAM13A
17	q21.2	rs684214	40196915:41196915	CED	4.65252e-08	0.0210683	0.00385559	9.68676e-05	0.0139335	0.00357418	0.0334148		0.00105604	0.0178698	0.00545567	0.215831	-0.00687888	0.00555775	0.000741992		0.0200029	0.00314866	2.11382e-10	0.00784434	0.00300619	0.00907032	RP11-400F19.8	HSD17B1, COASY, CAVIN1, TUBG2, BECN1, PSMC3IP, MLX, RETREG3, TUBG1, NAGLU, CNTNAP1, STAT3
11	p11.2	rs4647709	46737359:47737359	SSE	4.66275e-08	0.0330678	0.00605196	0.498933	0.00378778	0.0056018	0.000384416	AED	0.0148375	0.043062	0.0176741	0.683856	-0.00755609	0.0185557	0.0201252		0.0341167	0.00572559	2.54375e-09	0.00284027	0.00536275	0.596369	DDB2	ACP2, C11orf49, NR1H3, ARFGAP2, HARBI1, C1QTNF4, DDB2, SPI1
10	q24.32	rs11191515	104276527:105276527	SSE	4.66656e-08	0.0349511	0.00639682	0.268791	0.00660646	0.00597408	0.000298044	AED	0.000406473	0.0357697	0.0101153	0.318728	0.0103813	0.0104117	0.00569296		0.035185	0.00540646	7.61841e-11	0.00754143	0.00518169	0.145558	CNNM2	BORCS7, SFXN2, AS3MT, NT5C2, ATP5MD, MARCKSL1P1, SH3PXD2A, TRIM8, WBP1L, MFSD13A, CNNM2
3	q27.2	rs75135487	185305294:186305294	CED	4.70065e-08	-0.0241133	0.00441431	3.25283e-05	-0.0170096	0.00409367	0.0308507	CED	0.0750231	-0.011162	0.00626948	0.000341853	-0.0229374	0.00640418	0.053548		-0.0198207	0.00360939	3.98666e-08	-0.0187291	0.0034492	5.63607e-08	ETV5	ETV5
4	q24	rs57957741	102664166:103664166	CED	4.72708e-08	-0.0190006	0.00347897	0.025441	-0.00722329	0.00323239	0.00854177		0.0100318	0.01403	0.00544878	0.26574	0.00618628	0.00555849	0.0936084		-0.00943483	0.00293225	0.00129266	-0.00383455	0.00279427	0.169972	BANK1, SLC39A8	SLC39A8
20	q13.33	rs62217799	61847191:62847191	CED	4.84269e-08	0.019526	0.00357799	0.030395	0.00719966	0.0033256	0.011623		0.191192	0.00748398	0.00572569	0.000119281	0.0225204	0.00585255	0.00698701		0.0161442	0.00303426	1.03412e-07	0.0109391	0.0028914	0.000154751	RP4-583P15.15
3	q13.31	rs2918217	115046380:116046380	AED	5.05348e-08	0.0273666	0.00502169	0.707941	-0.00174353	0.00465409	2.12179e-05		0.000211464	0.0296643	0.00800585	0.318998	0.00830898	0.00833791	0.000942745		0.0280154	0.00425407	4.53233e-11	0.000644492	0.00406386	0.873991	LSAMP	LSAMP
1	q21.3	rs114529840	149957517:150957517	CED	5.20875e-08	-0.040491	0.00743733	1.38215e-05	-0.0300495	0.00691303	0.0810811		0.00665326	-0.0216138	0.00796415	0.0647971	-0.0150673	0.008159	0.202621		-0.0316974	0.0054357	5.4986e-09	-0.0237885	0.00527436	6.47594e-06	RPRD2, TARS2	BNIPL, HORMAD1, CTSS, CTSK, GOLPH3L
6	p21.33	rs3130048	31113739:32113739	CED	5.57079e-08	0.0189242	0.00348364	4.63138e-13	0.0234275	0.00323755	0.00526092		0.000570338	0.020225	0.00586968	0.0314198	0.0129364	0.00601193	0.0160842		0.019263	0.00299576	1.27513e-10	0.021069	0.0028505	1.45356e-13	BAG6	LINC00243, HLA-DQA1, HLA-H, HLA-G, RNF5, C2, CCHCR1, DDX39B, HLA-DRB5, BTN3A2, HSPA1B, HCG27, GPANK1, HLA-C, HCP5, C4A, TNXA, IER3, CYP21A1P, SLC44A4, TNXB, FLOT1, MICB, HLA-DQB1, BAG6, DDAH2, HLA-DRB1, C4B, DXO, PRRC2A, TSBP1, PPT2, CYP21A2, PBX2, LY6G5C, VARS2, HLA-B, HLA-DPB1, SKIV2L, APOM, HLA-DRB6, AGER
16	q22.1	rs11075747	69440361:70440361	CED	5.67684e-08	0.0193137	0.00355754	1.1356e-19	0.0300103	0.00330652	0.0156784	AED	0.17094	0.0102356	0.0074755	8.2051e-07	0.0379617	0.00769832	0.00442594		0.0176374	0.00321233	4.00747e-08	0.0312487	0.00303814	8.19249e-25	WWP2	NPIPB14P, CLEC18C, MIR140, PDXDC2P, CLEC18A, WWP2, SF3B3
8	q21.11	rs13262807	76724826:77724826	CED	5.68707e-08	0.0189662	0.00349374	6.9217e-12	0.022297	0.00325044	0.0294114		2.74542e-07	0.0277352	0.00539469	0.0319351	0.0118705	0.00553329	0.0068778		0.0215573	0.00293248	1.96403e-13	0.0196221	0.00280265	2.53649e-12	RNU2-54P, RP11-706J10.2
7	p14.1	rs4549685	38826478:39826478	CED	5.77313e-08	-0.0200253	0.00369066	4.39194e-08	-0.0187191	0.00341929	0.114225		0.000854223	-0.0178749	0.00535994	0.062199	-0.0102481	0.00549516	0.00139334		-0.0193337	0.00303975	2.01378e-10	-0.0163547	0.00290315	1.76647e-08	POU6F2	POU6F2
17	q11.2	rs2729455	27565573:28565573	CED	5.96377e-08	0.0187686	0.00346276	4.58445e-05	0.0131218	0.00321931	0.0843777		1.89949e-05	0.0241254	0.00564071	0.0139337	0.0141885	0.00576986	4.63973e-05		0.0202348	0.00295106	7.04234e-12	0.013375	0.00281132	1.95937e-06	SSH2	BLMH, EFCAB5, NSRP1, ABHD15, CPD, GIT1, GOSR1, ANKRD13B, TP53I13, CORO6, SSH2
1	p36.21	rs1203678	13605298:14605298	AED	6.17207e-08	-0.0196803	0.00363508	0.686659	-0.00136123	0.00337445	0.000221252		0.321189	0.0104326	0.0105164	0.0077904	-0.0289822	0.0108909	0.0046148		-0.0164664	0.00343563	1.64434e-06	-0.00378062	0.00322328	0.240831	PRDM2	PRDM2
10	q26.13	rs12218858	125974200:126974200	CED	6.36441e-08	0.0189358	0.00350111	0.00885329	0.00851883	0.00325432	0.0037439		9.77171e-05	0.0209959	0.00538816	0.430299	-0.00435436	0.00552102	0.000508029		0.0195474	0.00293578	2.76965e-11	0.00519944	0.00280353	0.0636527	METTL10	FAM53B, EEF1AKMT2
21	q22.12	rs74848904	36112241:37112241	CED	6.37831e-08	-0.0319027	0.00589906	0.0847498	-0.00949378	0.00550755	0.00549196		0.0362002	-0.0151001	0.0072085	0.344012	-0.00703847	0.00743805	0.0353164		-0.0251634	0.00456525	3.54897e-08	-0.00862431	0.00442623	0.0513609	RUNX1
4	q23	rs1229984	99739319:100739319	CED	6.69359e-08	0.0627693	0.0116251	0.00203273	0.0338957	0.0109857	0.0286142		0.303326	-0.0178542	0.0173452	0.00905672	-0.0477006	0.0182759	0.011027		0.0377791	0.0096568	9.14683e-05	0.0122383	0.00941557	0.193672	ADH1B
5	q14.1	rs41132	76908842:77908842	AED	7.08544e-08	-0.0216247	0.00401258	0.00464863	-0.0105481	0.00372664	0.000176808		0.0312361	-0.0145619	0.00675993	0.660536	0.00307056	0.00699162	0.0349105		-0.0197845	0.00345049	9.81824e-09	-0.007535	0.00328865	0.0219508	AP3B1	AP3B1
16	q24.1	rs4783156	84820577:85820577	AED	7.54242e-08	-0.0230066	0.00427792	0.0511692	-0.00774401	0.00397114	0.00876188		0.670995	0.00280724	0.00660859	0.00208958	0.0209649	0.00681254	0.0137954		-0.0153839	0.00359117	1.83718e-05	-0.000462997	0.00343081	0.892649	LINC00311, MIR5093
14	q21.3	rs35697587	46798505:47798505	CED	7.72968e-08	-0.0186469	0.00347011	0.00119018	-0.0104603	0.00322722	0.0163178		0.000121287	-0.0219362	0.00570664	0.209279	-0.00734241	0.00584788	0.0333745		-0.0195348	0.00296497	4.44155e-11	-0.00973242	0.00282552	0.000572173	RPL10L, MDGA2
6	p22.2	rs9467869	26239193:27239193	CED	8.36428e-08	-0.0252527	0.00471191	3.02027e-06	-0.0204084	0.0043705	0.0409816		0.0967333	-0.0332902	0.0200429	0.714668	-0.00734721	0.0200965	0.115147		-0.0256737	0.00458686	2.17822e-08	-0.0198186	0.00427067	3.47373e-06	RP11-457M11.5, GUSBP2
11	p11.2	rs12146571	47814077:48814077	CED	8.45292e-08	-0.0247914	0.00462748	0.000410709	-0.0152313	0.00431094	0.00637842		0.00542296	-0.0303475	0.0109126	2.53491e-05	-0.046835	0.011119	0.0847998		-0.0256382	0.00426027	1.76608e-09	-0.0193611	0.00401942	1.45804e-06	OR4X1, OR4S1	PTPRJ, MADD, C1QTNF4, SPI1, FNBP4
16	q22.2	rs11864188	71532954:72532954	CED	9.70777e-08	0.0188482	0.0035347	0.0022257	0.0100267	0.00327845	0.0672805		0.249945	-0.00624713	0.00542991	3.76784e-08	-0.0307067	0.00558054	0.000840818		0.011379	0.00296234	0.000122427	-0.000424606	0.00282674	0.880599	PKD1L3	HP, DHX38, DHODH, HPR
5	q33.2	rs2926867	152716377:153716377	CED	9.75819e-08	-0.0195271	0.00366265	0.000791166	-0.0114223	0.00340362	0.0442142		0.470754	-0.00387995	0.0053794	0.00603099	-0.0151993	0.00553461	0.0690186		-0.014571	0.00302752	1.48803e-06	-0.0124587	0.00289926	1.72954e-05	GRIA1, AC091962.3	FAM114A2
10	q22.1	rs12359330	71914845:72914845	CED	1.05265e-07	0.0208513	0.00392116	8.19344e-06	0.0162699	0.00364781	0.0107307		0.0335591	-0.0118649	0.00558238	0.972269	0.000199351	0.00573449	0.0658446		0.0100424	0.00320869	0.00174948	0.0116404	0.00307786	0.000155597	PRF1, ADAMTS14	PRF1, ADAMTS14, SGPL1
18	q21.32	rs17066856	57549656:58549656	AED	1.09497e-07	-0.0331767	0.00624743	6.44803e-14	-0.0440103	0.00586866	0.0108052	SSE_Female	0.596972	-0.00509013	0.00962646	0.000412053	-0.0357354	0.0101161	0.00312496		-0.024853	0.00524055	2.11163e-06	-0.0419266	0.00507629	1.46514e-16	MC4R, RP11-325K19.3
11	q25	rs11222421	130372351:131372351	CED	1.11082e-07	0.0184301	0.00347224	5.51279e-09	0.0188027	0.00322451	0.0912014		0.0277848	-0.0118894	0.00540325	0.517987	-0.00360244	0.00557258	0.0332751		0.00956872	0.00292109	0.00105385	0.0131827	0.00279095	2.31976e-06	SNX19, RN7SL167P	SNX19
3	q11.2	rs7621230	93507019:94507019	CED	1.13778e-07	-0.018374	0.00346454	5.62532e-13	-0.0231845	0.00321571	0.0129646	AED	1.64895e-05	0.0231826	0.00538076	0.592807	0.00296811	0.00555018	0.00446165		-0.00619483	0.00291295	0.0334488	-0.0166117	0.00278243	2.36923e-09	NSUN3, ARMC10P1	ARMC10, STX19
2	p23.3	rs113195763	24571380:25571380	CED	1.18019e-07	0.0327051	0.00617453	3.57325e-17	0.0484545	0.00574997	0.00701272	CED	0.019545	0.0143897	0.00616238	9.63622e-06	0.0278881	0.00630135	0.0432156		0.0235294	0.00436175	6.87233e-08	0.0391103	0.00424742	3.32233e-20	ADCY3	ADCY3, NCOA1, DNAJC27-AS1
16	p13.3	rs4785955	3797651:4797651	CED	1.19768e-07	0.0227085	0.00428941	0.0948264	0.00664828	0.00397987	0.00605664		0.06552	-0.0109767	0.00595994	0.00499948	-0.0173165	0.00616855	0.0139617		0.0112141	0.00348149	0.0012771	-0.000395407	0.00334423	0.905881	RP11-95P2.1	TFAP4, LINC01569
14	q12	rs11624623	25448430:26448430	AED	1.20572e-07	0.0197175	0.0037253	0.00149731	0.0110038	0.00346549	0.00212525		0.466305	-0.00438873	0.00602424	0.00100818	-0.0202141	0.00614696	0.0159931		0.0130492	0.00316843	3.81327e-05	0.00347459	0.00301879	0.249738	RP11-388G3.1, SNORD37
6	p21.2	rs9471333	39862023:40862023	CED	1.29306e-07	-0.018365	0.00347818	1.24534e-11	-0.0219271	0.00323635	0.207218	CED	0.00411366	0.0156686	0.00546037	4.30732e-05	0.023	0.00562239	0.0555187		-0.00854166	0.00293358	0.00359486	-0.0107459	0.00280486	0.000127542	LRFN2	LRFN2
17	q23.3	rs7210550	61285248:62285248	AED	1.30314e-07	-0.0404301	0.0076592	0.00110118	-0.0232148	0.00711377	0.00523736		0.000815454	-0.0404404	0.0120797	0.10243	-0.0201071	0.0123113	0.0200988		-0.0404331	0.00646853	4.08521e-10	-0.0224369	0.00615944	0.000269806	RP11-51F16.8	PSMC5, SMARCD2, GH2, CCDC47, DDX42, CSHL1, MAP3K3, STRADA, LIMD2, FTSJ3
2	p16.3	rs6545039	48146493:49146493	AED	1.39575e-07	-0.0222136	0.00421827	0.0061173	-0.0107162	0.00390895	0.00100892		0.528563	-0.00440925	0.0069965	0.00159034	-0.0225968	0.00715569	0.0156152		-0.0174671	0.00361249	1.3302e-06	-0.0134467	0.00343047	8.86285e-05	FOXN2, RP11-191L17.1	PPP1R21, STON1, FOXN2, MSH6
16	q12.2	rs73622719	53770077:54770077	CED	1.39688e-07	0.0409072	0.00776835	0.0202677	0.0166784	0.00718473	0.0220365		0.266547	0.020918	0.0188269	0.152121	0.0269182	0.0187963	0.0687019		0.0379991	0.00718106	1.21272e-07	0.0179838	0.00671116	0.00736914	FTO, RP11-324D17.2
14	q24.3	rs10873302	77047212:78047212	CED	1.44305e-07	0.020169	0.00383448	3.00832e-08	0.0197508	0.00356437	0.0805233	AED	0.000785827	-0.0222475	0.00662511	0.42439	-0.00543043	0.00679793	0.0113381		0.00952549	0.0033187	0.00410152	0.0143207	0.00315675	5.71849e-06	RP11-7F17.4	IRF2BPL, LINC02289, CIPC, AC007686.2
3	p25.2	rs9875338	11796469:12796469	AED	1.44801e-07	0.0186088	0.00353828	0.0223457	0.00750228	0.00328405	0.0131189		0.0165366	-0.0131145	0.00547127	5.6176e-05	-0.0225573	0.00559908	0.00537216		0.00925384	0.00297112	0.00184195	-0.000191907	0.00283274	0.945988	SYN2, GSTM5P1	MKRN2, PPARG, TSEN2, SYN2, CAND2
6	p12.3	rs17738108	50647806:51647806	CED	1.44822e-07	0.0214669	0.00408174	0.000260953	0.0138519	0.00379365	0.0136711		0.000425152	0.019609	0.00556392	0.705978	0.00215027	0.0056996	0.0111589		0.0208169	0.0032911	2.52921e-10	0.0102594	0.00315806	0.00115962	FTH1P5, RP3-437C15.2
12	q23.3	rs2287214	107590518:108590518	CED	1.46151e-07	0.018657	0.00354859	9.82868e-06	0.0145641	0.00329427	0.0705829		0.00772696	-0.0155962	0.00585458	0.249836	0.00693426	0.00602579	0.00218111		0.00945397	0.00303466	0.00183741	0.0128084	0.00289052	9.37112e-06	PWP1	BTBD11, PWP1, PRMT1, ASCL4, ADM5, PRDM4
7	q22.1	rs574637649	98525328:99525328	CED	1.4837e-07	-0.044945	0.00855312	0.0248756	-0.0178926	0.00797586	0.0060054		0.326651	-0.054017	0.055069	0.00287475	-0.159188	0.0534008	0.00281242		-0.0451587	0.00845179	9.1373e-08	-0.0209758	0.00788836	0.00783528	ATP5J2-PTCD1
3	p21.33	rs9865173	43516658:44516658	CED	1.57938e-07	-0.0198799	0.00379149	0.00265419	-0.0105856	0.00352241	0.0160723		0.00757562	-0.160862	0.0602346	0.198692	-0.0710447	0.0552745	0.134703		-0.0204363	0.003784	6.63785e-08	-0.0108301	0.00351528	0.00206395	RP4-672N11.1, RP4-555D20.3
10	q23.33	rs2077218	95571561:96571561	CED	1.58556e-07	0.0213858	0.00407926	0.56886	0.00214978	0.00377332	0.000379315		0.299822	-0.0125823	0.0121353	0.00723987	-0.0326543	0.0121584	0.0327629		0.0179372	0.00386665	3.50167e-06	-0.00090788	0.00360376	0.801098	PLCE1	NOC3L, TBC1D12, HELLS
7	p22.2	rs1182199	2362542:3362542	CED	1.61461e-07	-0.0198513	0.00378899	0.0168423	-0.00843011	0.00352702	0.0103999		0.690642	-0.00214615	0.00539249	0.0632315	0.0102639	0.00552533	0.0354833		-0.0139993	0.00310021	6.3136e-06	-0.00301806	0.00297295	0.310023	GNA12	GNA12, AC006028.1, PFDN4, AMZ1
5	q33.3	rs201769762	157509230:158509230	CED	1.6642e-07	-0.0224601	0.00429149	1.61615e-06	-0.0191405	0.00399055	0.127743		0.209398	-0.00717079	0.00571265	0.0239756	-0.0131732	0.00583502	0.051478		-0.0169444	0.00343117	7.87735e-07	-0.0172389	0.00329391	1.66269e-07	RP11-32D16.1, EBF1
1	p36.32	rs3762444	1927712:2927712	CED	1.82779e-07	-0.0182773	0.0035039	0.0109161	-0.0082759	0.00325132	0.00334555		0.0341771	-0.0116508	0.00550068	0.00274243	-0.0168613	0.00562905	0.074831		-0.0163646	0.00295526	3.06905e-08	-0.0104236	0.00281543	0.000213632	PLCH2	MMEL1, PRXL2B, PANK4, TTC34, TNFRSF14, AP2A2, PLCH2, AL139246.2
10	p12.31	rs10828247	21322856:22322856	CED	1.86971e-07	0.0192473	0.00369282	5.14079e-11	0.0224918	0.00342488	0.134656		0.258102	0.00663175	0.00586409	1.59243e-06	0.0288116	0.00600246	0.00225656		0.015665	0.00312484	5.35696e-07	0.024044	0.00297472	6.33099e-16	SKIDA1, MLLT10	NEBL, MLLT10
11	p11.2	rs113618854	47512563:48512563	CED	2.00507e-07	0.032495	0.00625012	8.28556e-09	0.0337314	0.0058533	0.141784		0.0488362	0.0325329	0.0165134	0.669481	-0.00721697	0.016907	0.0226514		0.0324997	0.00584544	2.70012e-08	0.0293487	0.0055312	1.12039e-07	PTPRJ	ACP2, MYBPC3, C1QTNF4, NR1H3, SPI1, PSMC3, PTPRJ
3	p12.1	rs11719438	85427575:86427575	CED	2.02947e-07	0.0242628	0.00466876	0.0335617	0.00920429	0.00433079	0.0180462		0.00133752	0.0225345	0.00702429	0.0165736	0.0171699	0.00716567	0.0133315		0.0237332	0.00388824	1.03545e-09	0.0113355	0.00370644	0.00222584	CADM2
9	p22.3	rs62571029	15017878:16017878	CED	2.10288e-07	-0.0440919	0.00849519	1.57298e-07	-0.0412058	0.0078577	0.0705894		0.0256638	-0.0265966	0.0119195	0.000603005	-0.0424041	0.0123608	0.0398423		-0.0381986	0.00691796	3.3583e-08	-0.0415507	0.00663125	3.70696e-10	PSIP1, RN7SL98P
12	p11.22	rs11049416	27843238:28843238	AED	2.19732e-07	0.0181676	0.00350588	0.0547468	0.00626285	0.00326038	0.00384047		0.393877	0.00527137	0.00618256	0.0124202	0.0158202	0.00632786	0.0204843		0.0150297	0.00304968	8.29482e-07	0.00826782	0.00289829	0.00433557	RP11-967K21.1	CCDC91
5	p15.33	rs141134342	1740531:2740531	OED	2.31041e-07	0.0874575	0.0169076	0.360674	-0.0142992	0.0156433	5.65807e-06		0.0275531	0.0554802	0.025176	0.548271	-0.0160877	0.0267969	0.0257998		0.0775181	0.0140361	3.33696e-08	-0.0147538	0.0135098	0.274797	Y_RNA, RP11-129I19.2
10	q23.33	rs11187838	95538686:96538686	CED	2.31669e-07	-0.0180933	0.00349821	0.0121817	-0.00814353	0.0032485	0.0268282		0.0614314	0.0122707	0.00656032	0.77497	0.00190574	0.0066662	0.0621808		-0.011371	0.00308678	0.000229813	-0.00621508	0.00292022	0.0333129	PLCE1	NOC3L, HELLS
13	q34	rs9522257	111671024:112671024	CED	2.33114e-07	0.0182914	0.0035373	0.00158982	0.0103544	0.00327897	0.00625189		0.00847255	-0.0147707	0.00561026	0.0654616	-0.0106134	0.00576145	0.0700819		0.0088867	0.0029922	0.0029784	0.0052245	0.00284977	0.0667571	TEX29, RP11-65D24.2
7	p13	rs799449	44284697:45284697	CED	2.37096e-07	-0.0183909	0.00355872	9.79119e-06	-0.0145917	0.00329991	0.0207458		0.0142734	0.0789947	0.032237	0.89803	-0.00404658	0.0315766	0.0328671		-0.0172184	0.00353723	1.1287e-06	-0.0144778	0.00328204	1.02791e-05	OGDH, ZMIZ2	DDX56, ZMIZ2, H2AFV, TMED4, CCM2, PPIA
9	q33.3	rs7027304	128908290:129908290	CED	2.4391e-07	0.0188349	0.00364839	1.19626e-05	0.014897	0.00340241	0.103526		0.0111229	0.0140944	0.00555125	0.00436331	0.0162098	0.00568609	0.129356		0.0174049	0.00304887	1.13875e-08	0.0152431	0.00291963	1.78055e-07	LMX1B	LMX1B
17	q25.3	rs147576596	78222281:79222281	CED	2.50657e-07	-0.0191772	0.00371836	9.04069e-07	-0.0169942	0.00346001	0.0931671		0.391444	-0.00463536	0.00540875	0.0019252	-0.0172358	0.00555682	0.00866829		-0.0145102	0.00306413	2.18508e-06	-0.0170617	0.00293717	6.28861e-09	RPTOR	RPTOR
3	p24.2	rs1561114	24755958:25755958	AED	2.56072e-07	0.0179287	0.00347899	0.682116	-0.0013239	0.00323234	3.90932e-06		0.0144724	-0.0167692	0.00685731	0.984897	0.000131478	0.00694565	0.0416758		0.0108259	0.00310254	0.000484176	-0.00106481	0.00293054	0.716343	RARB
5	q11.2	rs6861649	50364788:51364788	CED	2.58063e-07	0.0180167	0.00349705	0.000360818	0.0115839	0.00324728	0.0235681		0.00506695	0.015688	0.005597	0.376972	0.00505677	0.00572357	0.0324368		0.0173629	0.00296575	4.78558e-09	0.0099945	0.00282437	0.000402164	CTD-2335O3.3, RNA5SP182
7	q11.23	rs236660	74550086:75550086	CED	2.58118e-07	0.0180425	0.00350208	2.50197e-12	0.0227574	0.00324936	0.0335147		0.804562	0.00160728	0.00649542	0.000371123	0.0236947	0.00665563	0.00877399		0.0143409	0.00308258	3.28348e-06	0.0229378	0.00291995	3.98058e-15	POM121C	NCF1, HIP1, STAG3L3, POM121C, PMS2P3, GTF2I, PMS2P6, STAG3L1
11	q13.2	rs4930349	65519936:66519936	CED	2.58536e-07	-0.0186499	0.00362021	1.58796e-05	-0.0144602	0.00335019	0.0606997		0.000367388	-0.0312012	0.0087574	0.0901772	-0.0150426	0.00887727	0.00845169		-0.0204817	0.00334561	9.24241e-10	-0.0145328	0.00313441	3.54299e-06	RP11-755F10.1, KLC2	SLC29A2, EFEMP2, KDELC2, SNX32, PACS1, RAB1B, SF3B2, LARP1B, BANF1, GAL3ST3, CTSW
6	q26	rs17630640	163607529:164607529	AED	2.63683e-07	0.0263692	0.0051223	0.747178	0.00153506	0.00476189	0.000383963		0.578087	0.00331295	0.00595655	0.117338	0.00958357	0.00611947	0.0886888		0.0165674	0.00388376	1.99163e-05	0.00457056	0.00375812	0.223916	RP5-826L7.1, RP1-230L10.1
2	p23.3	rs1009388	24891101:25891101	CED	2.63901e-07	0.0198474	0.00385554	2.47691e-18	0.0311979	0.00357199	0.00253144	AED	0.00076941	-0.0218798	0.00650432	0.0467131	-0.0132408	0.00665715	0.0327566		0.00899787	0.00331664	0.00666873	0.0212639	0.00314752	1.4208e-11	POMC	ADCY3, DNMT3A, DNAJC27-AS1, POMC
19	p13.3	rs77233515	4772060:5772060	CED	2.72168e-07	-0.0351124	0.00682858	0.139748	-0.00938386	0.00635445	0.00422422		0.0601043	-0.012724	0.00676774	0.66962	-0.00293143	0.00687044	0.102079		-0.023818	0.00480688	7.2336e-07	-0.00640901	0.00466504	0.169491	PTPRS	ARRDC5, KDM4B
6	p22.1	rs9357034	26743425:27743425	CED	2.73917e-07	0.0227316	0.00442182	0.0467024	0.00816096	0.00410304	0.0157146		0.0068458	-0.0566426	0.0209444	0.991414	0.000233632	0.02171	0.0206653		0.0193447	0.00432645	7.77621e-06	0.00788757	0.00403167	0.0504176	XXbac-BPGBPG24O18.1, POM121L2	ZNF204P, ZNF322, ZSCAN12P1, BTN3A2, HIST1H4H, HIST1H2BJ, BTN2A2, ZKSCAN4, ABT1, HIST1H2BK, ZSCAN16, BTN3A1, ZSCAN9, HIST1H4C, HCG11, FAM222B
18	q21.32	rs17835704	56377299:57377299	CED	2.99299e-07	-0.0233961	0.0045659	0.00121466	-0.0137027	0.00423514	0.0165857		0.0448816	0.0110291	0.00549852	0.961715	-0.000268663	0.00559698	0.0699615		-0.00934635	0.00351271	0.0077972	-0.00881139	0.00337725	0.0090795	SEC11C, GRP
2	q36.3	rs34412673	230092359:231092359	CED	3.49839e-07	0.0188975	0.00370931	1.0149e-08	0.0197512	0.0034479	0.186642		0.00165594	0.0181372	0.00576492	0.0197065	0.0137938	0.00591507	0.0225739		0.0186749	0.00311938	2.14102e-09	0.0182404	0.00297878	9.15823e-10	DNER, TRIP12	TRIP12, SP110
12	q24.31	rs2133633	122659400:123659400	AED	3.52373e-07	0.0339648	0.00666859	0.00107174	0.0201734	0.0061673	0.04276		0.00332697	-0.0456672	0.0155542	0.584028	-0.00857871	0.0156684	0.0154718		0.0216003	0.00612904	0.000424688	0.0163164	0.00573874	0.0044664	HCAR1	ABCB9, RSRC2, PITPNM2, KMT5A
12	q24.31	rs11060333	122178607:123178607	CED	3.95725e-07	0.027711	0.00546437	0.0284383	0.0110677	0.00505095	0.0253097		0.787964	-0.00164293	0.00610852	2.17974e-05	0.0262409	0.00617997	0.000554512		0.0146628	0.00407265	0.000317833	0.0171442	0.00391089	1.16672e-05	LRRC43	HCAR3, VPS33A, DIABLO, LRRC43, B3GNT4
1	q32.1	rs2490414	203031107:204031107	SSE	4.11069e-07	0.0176918	0.00349367	0.0133248	0.00801729	0.00323932	0.00068645		0.303558	0.00622633	0.00605174	0.0236747	0.014124	0.00624279	0.0393364		0.0148258	0.00302567	9.58351e-07	0.00931271	0.00287528	0.00119998	OPTC, ATP2B4
2	q24.3	rs34601572	164789750:165789750	AED	4.45662e-07	0.0448753	0.00888876	0.159525	0.0117511	0.00835379	0.00379545		0.200496	0.0190425	0.0148751	0.000904877	-0.0519718	0.0156599	0.000504676		0.0380781	0.00763025	6.02501e-07	-0.0023654	0.00737063	0.74827	AC110086.1, GRB14
16	q21	rs60262300	64047693:65047693	CED	4.55116e-07	-0.0238608	0.00473004	0.0465405	-0.00870402	0.00437284	0.00580549		0.0258332	-0.0373787	0.0167707	0.637839	-0.00807596	0.0171564	0.110972		-0.0248569	0.00455244	4.75795e-08	-0.00866571	0.00423737	0.0408481	RP11-467L24.1
3	q22.2	rs6801218	134162251:135162251	CED	4.62175e-07	-0.0176678	0.00350441	0.0397754	-0.00670414	0.00326063	0.0213623		0.0169865	0.0131562	0.00551133	0.61555	0.0028397	0.00565485	0.086174		-0.00879333	0.00295722	0.00294408	-0.00432278	0.0028247	0.125929	EPHB1	EPHB1
16	q24.1	rs139929928	84823516:85823516	CED	4.73302e-07	0.0619053	0.01229	0.060656	0.0215776	0.0115019	0.00986281		0.0198872	0.0463208	0.0198923	0.0780582	0.0350972	0.0199177	0.156982		0.0575999	0.0104555	3.60726e-08	0.0249586	0.00996042	0.0122183	LINC00311, MIR5093
6	p21.31	rs11755266	34662141:35662141	CED	4.75152e-07	0.029682	0.00589363	2.37884e-08	0.0306974	0.0054992	0.0131897		0.452921	0.0136817	0.0182285	0.0155527	0.0456977	0.0188885	0.111296		0.0281677	0.00560781	5.08854e-07	0.0318695	0.00527998	1.58063e-09	TCP11, SCUBE3	UHRF1BP1, PACSIN1, DEF6, SNRPC, TULP1, RPL10A, C6orf106
16	p12.3	rs7192550	19763780:20763780	CED	4.99644e-07	-0.0338157	0.00672729	0.0195731	-0.0145911	0.00625032	0.00822643		0.552687	-0.00432248	0.00728003	0.00379034	-0.0218114	0.00753347	0.0326144		-0.0202311	0.00494078	4.22678e-05	-0.0175349	0.00481028	0.000267084	SNRPEP3, GP2
13	q12.2	rs9512696	27512527:28512527	CED	5.0559e-07	0.0184117	0.00366447	1.16318e-05	0.014927	0.00340449	0.200386		0.985989	-9.46656e-05	0.00539053	0.00705532	-0.0148663	0.00551757	0.00382383		0.0125625	0.00303053	3.3935e-05	0.00671175	0.00289734	0.0205296	MTIF3	GTF3A, MTIF3
6	p22.2	rs72834677	25606604:26606604	CED	5.2338e-07	0.0263044	0.00524229	0.000781425	0.0163481	0.00486644	0.00726879		0.70191	-0.00728136	0.019024	0.0504628	0.0379575	0.0194049	0.0109802		0.0239341	0.00505392	2.1825e-06	0.0176268	0.00472027	0.000188261	HIST1H4C, HIST1H1T	BTN3A2, TRIM38, HIST1H4D, FBRSL1, GUSBP2
3	q22.3	rs2347252	137595525:138595525	AED	5.36104e-07	-0.0236668	0.00472097	0.0202234	-0.0102033	0.0043938	0.0151736		0.0143478	0.013797	0.00563473	0.957534	0.000307216	0.00576947	0.00270968		-0.00821507	0.00361873	0.0231982	-0.00634512	0.00349555	0.0694932	MRAS	ESYT3, CEP70, MRAS, FAIM
19	q13.32	rs3810291	47069003:48069003	CED	5.5503e-07	0.0185057	0.00369638	2.44819e-11	0.0229838	0.00344233	0.0525043		0.00609105	-0.0155322	0.00566245	0.701759	0.00221091	0.00577337	0.0064587		0.00833508	0.00309526	0.00708429	0.0175357	0.00295666	3.01238e-09	ZC3H4	TMEM160, SAE1
20	q12	rs2903376	39707179:40707179	CED	5.73939e-07	0.0223732	0.00447465	0.0127666	0.010329	0.0041478	0.0190763		0.0038611	0.0156663	0.00542179	0.295651	0.00578228	0.00552896	0.0244323		0.0196558	0.0034511	1.23e-08	0.00869164	0.00331793	0.00880338	CHD6	CHD6
12	q23.2	rs11111540	103261501:104261501	CED	5.75402e-07	-0.0182249	0.00364536	0.0290734	-0.00739274	0.00338727	0.0261172		0.52443	0.00347403	0.0054577	0.00425359	0.0161218	0.00563919	0.0447159		-0.0115308	0.00303135	0.000142469	-0.00115814	0.00290371	0.690004	C12orf42
6	p21.31	rs2814994	34120153:35120153	CED	6.13046e-07	0.018666	0.00374273	1.90892e-23	0.0347025	0.00347756	0.00169584		0.104447	0.00924995	0.00569679	0.00164044	0.0186135	0.00591125	0.0372099		0.0158271	0.00312804	4.19822e-07	0.0305659	0.00299735	2.03153e-24	C6orf106	UHRF1BP1, PACSIN1, SNRPC, C6orf106
3	q25.2	rs1568488	153157951:154157951	CED	6.27898e-07	0.017533	0.00351883	0.000250995	0.0119547	0.00326513	0.0312529		2.76474e-05	-0.0257484	0.00614135	0.0118963	-0.0158603	0.00630548	0.000242922		0.00683569	0.00305317	0.0251633	0.00607337	0.00289946	0.0362015	RP11-217E22.5	ARHGEF26, DHX36
2	p25.3	rs6710140	121006:1121006	CED	6.32564e-07	0.0183287	0.00367957	0.000260127	0.0124764	0.00341619	0.0210608		0.270472	0.00629363	0.00571113	0.000103214	0.0228735	0.00589023	0.00142823		0.0147984	0.00309317	1.71657e-06	0.0150934	0.00295514	3.2644e-07	AC093326.3, TMEM18	LINC01115, SH3YL1
10	q21.3	rs10997957	69416441:70416441	CED	6.43224e-07	-0.0180744	0.00363089	0.0530934	-0.00652266	0.00337233	0.00731093		0.214867	0.00723721	0.00583498	0.00617702	0.0163917	0.00598593	0.00385651		-0.0110092	0.00308278	0.000355355	-0.00100202	0.00293814	0.733074	MYPN	SLC25A16, MYPN, STOX1
6	q16.1	rs4601133	97853749:98853749	CED	7.10546e-07	0.0239958	0.00483919	0.00349726	0.013153	0.00450396	0.0384218		0.0256995	0.018525	0.00830412	0.00166057	0.0269773	0.00857714	0.0385583		0.0226089	0.00418106	6.39233e-08	0.016141	0.00398761	5.17032e-05	RP11-436D23.1
8	q21.11	rs2977324	76216737:77216737	CED	7.88417e-07	0.0187502	0.00379682	1.90519e-12	0.0248717	0.00353205	0.0305251	AED	0.00112667	-0.0177818	0.00545938	0.495529	-0.00382148	0.00560707	0.0084779		0.00684085	0.0031171	0.0281909	0.0167205	0.00298853	2.20786e-08	AC016194.1, snoU13
9	q22.32	rs144736709	98675345:99675345	CED	8.22348e-07	-0.0467505	0.00948252	0.0398295	-0.0180384	0.00877554	0.0235814		0.110527	-0.0106796	0.006692	0.000818251	-0.0229023	0.00684307	0.0327241		-0.0226718	0.00546757	3.37461e-05	-0.0210631	0.00539633	9.49197e-05	ZNF367	HABP4
2	p21	rs2949785	46783502:47783502	CED	8.23498e-07	-0.0203421	0.00412627	0.000156496	-0.0145286	0.00384292	0.0364148		0.873694	-0.00134051	0.00843252	8.27065e-05	-0.0344084	0.00874016	0.00323669		-0.0166713	0.00370633	6.85799e-06	-0.0177492	0.00351789	4.52544e-07	C2orf61	TTC7A
3	q22.1	rs11928040	131229115:132229115	CED	8.26547e-07	0.0187951	0.00381302	0.000529063	0.0122881	0.00354567	0.0639242		6.84116e-05	0.0236832	0.00594715	0.000356971	0.0216671	0.0060687	0.0144812		0.0202191	0.00320992	2.99681e-10	0.0146749	0.00306145	1.63931e-06	CPNE4	CPNE4
16	q24.3	rs77733403	89580723:90580723	CED	8.43253e-07	0.0185871	0.00377381	0.000517235	0.0121614	0.00350298	0.0129359		0.000106907	0.0208499	0.00538085	0.459125	0.00409513	0.00553175	7.38551e-05		0.0193332	0.00308968	3.91608e-10	0.00985262	0.0029595	0.000871103	DBNDD1	SPATA2L, DBNDD1, AFG3L1P, ZNF276, DEF8, VPS9D1, FAM157C, GAS8, FANCA, ANKRD11, MC1R, TCF25
20	q13.12	rs8356	43036455:44036455	CED	8.73161e-07	0.0191723	0.00389804	0.00673219	0.00985683	0.00363742	0.0131748		0.0742252	0.00964656	0.00540339	0.930378	-0.000483757	0.00553688	0.066548		0.0159117	0.00316128	4.82073e-07	0.00673947	0.00304009	0.0266324	YWHAB	PABPC1L, TOMM34, YWHAB
10	q24.31	rs7922986	101911904:102911904	CED	8.84537e-07	0.0176107	0.00358238	0.00753246	0.00889894	0.00332998	0.039779		2.91742e-05	0.0265366	0.00634785	0.104593	0.0106391	0.00655513	0.00395071		0.0197668	0.00311985	2.36097e-10	0.00925589	0.00296887	0.001823	HIF1AN, PAX2	TOLLIP
9	q22.31	rs2482704	93682363:94682363	AED	9.44949e-07	-0.017176	0.0035032	0.0347363	-0.00687398	0.0032556	0.0312282		0.653142	0.0043137	0.00959868	0.154767	-0.0141129	0.00991827	0.085214		-0.01465	0.00329088	8.519e-06	-0.00757806	0.00309322	0.0142899	NFIL3	NFIL3, AL353764.1
5	q34	rs1025484	166429451:167429451	AED	9.55276e-07	-0.0175499	0.00358102	0.00862656	-0.00871109	0.00331657	0.00319571		0.818738	-0.00125949	0.00549585	0.0710151	-0.01025	0.00567733	0.0659121		-0.0126949	0.00300031	2.32464e-05	-0.00910264	0.00286373	0.0014799	TENM2
7	p14.3	rs215607	31838337:32838337	CED	9.65346e-07	0.0206027	0.0042057	0.326489	0.00383158	0.00390495	0.000201658		0.0130454	0.0182822	0.00736396	0.590531	0.0040267	0.00748359	0.0872672		0.020032	0.00365206	4.1319e-08	0.00387334	0.00346198	0.263216	PDE1C
2	q13	rs13407583	113467740:114467740	CED	9.72726e-07	0.0206875	0.00422431	0.397335	0.00332804	0.00393204	0.000720792		0.00680145	0.020978	0.00775073	0.527644	0.00501669	0.00794268	0.0751819		0.020754	0.00370918	2.2022e-08	0.00366043	0.00352387	0.29892	PSD4, PAX8-AS1	PSD4
14	q12	rs2180454	29190513:30190513	AED	9.84744e-07	-0.0197237	0.00402949	3.89689e-10	-0.0234012	0.00373915	0.0226413	AED	0.239809	-0.0129079	0.0109809	0.000764164	-0.0376835	0.0111963	0.0239467		-0.0189148	0.00378284	5.72809e-07	-0.0248343	0.0035466	2.51824e-12	RP11-148E17.1, RP11-562L8.1
18	q11.2	rs1788808	20590023:21590023	CED	1.00866e-06	-0.0172254	0.00352248	3.87218e-09	-0.0192082	0.00326125	0.058169	SSE_Male	7.69266e-07	-0.026652	0.00539081	0.0451457	-0.0110174	0.00549947	7.50165e-06		-0.0200459	0.00294878	1.06049e-11	-0.0170772	0.00280511	1.1441e-09	NPC1	NPC1, TMEM241, RMC1
11	q25	rs10894670	132721987:133721987	CED	1.05913e-06	-0.0170153	0.00348637	0.00577002	-0.00894609	0.00324063	0.0384342		0.0406002	-0.0144144	0.0070394	0.506319	-0.00481695	0.00724805	0.0108752		-0.016503	0.0031242	1.27563e-07	-0.00825818	0.0029584	0.00524746	OPCML
8	q11.23	rs77897669	53793773:54793773	CED	1.09072e-06	-0.017141	0.00351632	0.875528	-0.000512181	0.00326978	0.000318199		0.0696526	-0.0200896	0.0110734	0.97274	0.000390632	0.0114311	0.0660686		-0.0174111	0.00335141	2.04545e-07	-0.000443899	0.0031437	0.88771	OPRK1, RP11-1081M5.2
12	p13.33	rs55726687	491306:1491306	CED	1.15984e-06	0.0205601	0.00422825	1.36621e-05	0.0170665	0.00392394	0.017689		0.247403	0.00762379	0.00659098	0.000725194	0.0227676	0.00673571	0.0519266		0.0167884	0.00355887	2.38952e-06	0.0185111	0.00339056	4.77245e-08	WNK1	AC021054.1, RAD52
12	q23.3	rs10861726	107232627:108232627	AED	1.24785e-06	0.0171492	0.00353732	0.0304173	0.00709911	0.0032796	0.000290849		0.148909	0.00994534	0.00689008	0.00168641	-0.0220646	0.00702531	0.000570969		0.0156465	0.00314684	6.62168e-07	0.00188077	0.00297174	0.526808	BTBD11	BTBD11
15	q23	rs140450540	67420679:68420679	CED	1.33119e-06	-0.0290463	0.00600724	0.00249997	-0.0169096	0.00559295	0.00048335		0.745473	0.00301303	0.00928177	0.0333512	0.0202007	0.00949328	0.0813231		-0.0195818	0.00504316	0.00010324	-0.00734768	0.00481883	0.127313	HNRNPA1P5	CLN6, MAP2K5
12	q24.31	rs76929617	120367798:121367798	CED	1.51407e-06	-0.0430443	0.00894976	1.2705e-07	-0.0437005	0.00827152	0.0611597		0.851359	-0.00523101	0.0279157	0.00718635	-0.0746492	0.0277691	0.0206413		-0.0395199	0.00852248	3.53264e-06	-0.0462227	0.00792732	5.51599e-09	RP1-166H1.2, COX6A1	COQ5
9	q21.11	rs2152647	70982288:71982288	AED	1.56448e-06	0.0166447	0.00346548	0.283102	0.00345418	0.00321803	0.000181986		0.797169	-0.00137988	0.00536885	0.109991	0.00880632	0.00550992	0.0927399		0.0113436	0.00291161	9.78037e-05	0.00481548	0.00277881	0.0831081	PIP5K1B	AL353616.2, PGM5
11	q23.3	rs1135663	116288837:117288837	AED	1.60526e-06	0.0343148	0.00715213	0.000413466	0.0233403	0.00660936	0.027321		0.570299	0.0114329	0.0201419	0.0301716	0.0448682	0.0206966	0.0326409		0.0317527	0.00673984	2.4626e-06	0.0253326	0.00629611	5.73329e-05	SIK3	SIK3, SIDT2, PAFAH1B2, PCSK7, TAGLN
16	q22.2	rs28483459	71498398:72498398	CED	1.69814e-06	-0.0257822	0.00538638	0.969046	-0.000195746	0.00504431	0.000489835		0.310638	-0.00769842	0.00759288	0.00262302	-0.0232853	0.00773866	0.024829		-0.0197282	0.00439321	7.10159e-06	-0.0070808	0.00422583	0.0938163	PKD1L3	PHLPP2, ZNF23, HPR
14	q23.2	rs217667	61858847:62858847	CED	1.75393e-06	0.0186501	0.00390164	7.27333e-05	0.0143673	0.00362147	0.166512		0.00318095	0.0177459	0.00601575	0.026292	0.0137101	0.00617031	0.104162		0.0183824	0.00327344	1.95869e-08	0.0141989	0.00312326	5.46289e-06	CTD-2277K2.1
16	q22.2	rs62051148	71999147:72999147	AED	2.01708e-06	-0.0255872	0.00538465	0.999126	5.52305e-06	0.00504297	7.31765e-06		0.0020722	-0.0267681	0.00869113	0.0272184	-0.0196172	0.0088828	0.00988162		-0.0259148	0.00457734	1.50024e-08	-0.00477746	0.00438551	0.275988	AC004158.2	HPR
4	q22.3	rs3775048	95626422:96626422	CED	2.06573e-06	-0.0177684	0.00374305	0.0147976	-0.00845096	0.00346732	0.0678275		2.25594e-05	-0.0407449	0.00961296	0.376963	-0.00871017	0.00985854	0.00999608		-0.0207933	0.00348797	2.50016e-09	-0.00847949	0.00327091	0.00953109	UNC5C
1	q25.1	rs77154778	173241071:174241071	CED	2.14698e-06	-0.0603622	0.0127367	0.0406242	-0.0246744	0.0120518	0.0337532		1.44018e-06	-0.0863538	0.0179148	0.0588041	-0.0346967	0.0183609	0.0108012		-0.069089	0.0103806	2.82158e-11	-0.0276922	0.0100753	0.00598623	KLHL20	PRDX6, RC3H1
6	p22.3	rs55933147	20200600:21200600	CED	2.21612e-06	-0.0177151	0.00374304	0.00158912	-0.0110102	0.00348651	0.0240178		0.0264272	0.0127798	0.00575675	0.941963	-0.000429785	0.00590335	0.00678689		-0.00865382	0.00313804	0.00582072	-0.00827406	0.00300204	0.00584862	CDKAL1
12	q23.3	rs3764002	108118630:109118630	CED	2.31629e-06	-0.0188246	0.00398503	9.81907e-07	-0.0181331	0.00370413	0.0777441		0.00355077	-0.0169545	0.00581479	0.0153903	-0.0145312	0.0059968	0.027988		-0.018227	0.00328716	2.94139e-08	-0.0171384	0.00315141	5.37874e-08	WSCD2
5	q15	rs6234	95228974:96228974	CED	2.51525e-06	0.0170195	0.00361573	0.00320988	0.00989447	0.00335756	0.0224753		0.00102227	-0.019113	0.00581892	0.677972	-0.00247073	0.00595021	0.00414626		0.00695462	0.00307113	0.0235423	0.00690816	0.00292415	0.0181543	PCSK1
1	p21.3	rs4255425	95778606:96778606	CED	2.84625e-06	0.0185718	0.00396682	0.00277157	0.0110031	0.00367745	0.0594983		0.00127058	-0.0350601	0.0108787	0.343789	-0.0107023	0.0113046	0.0170523		0.0122776	0.00372679	0.000986224	0.00892596	0.00349707	0.0106979	RP11-286B14.1, AC092812.1
15	q24.1	rs1904335	72951443:73951443	CED	3.09117e-06	0.016266	0.00348694	5.33373e-08	0.017604	0.00323602	0.0425735		0.025471	-0.0124756	0.00558373	9.02003e-05	-0.0224959	0.00574471	0.00276105		0.00820214	0.00295761	0.00555022	0.00794481	0.00281947	0.00483478	NEO1	NEO1
2	q24.1	rs78542747	156138349:157138349	CED	3.12243e-06	-0.0167205	0.00358596	0.144323	-0.0048458	0.0033193	0.00317109		0.806245	-0.00205009	0.00835834	0.00417617	0.0248829	0.00868603	0.00240614		-0.01444	0.00329547	1.17726e-05	-0.00105763	0.00310062	0.733025	RNU6-546P, AC093375.1	GPD2
12	q24.31	rs144713920	121985389:122985389	AED	3.13382e-06	-0.0362895	0.0077841	3.75142e-10	-0.0452732	0.00722711	0.138705		0.252466	0.0610636	0.0533586	0.0553212	-0.10972	0.057253	0.014548		-0.0342608	0.00770257	8.66841e-06	-0.046284	0.00717021	1.08189e-10	BCL7A	HCAR3, MLXIP
8	q13.3	rs7845090	72949940:73949940	CED	3.26778e-06	-0.0178743	0.00384113	7.26733e-11	-0.0232217	0.00356412	0.0357309	AED	0.527638	0.00576198	0.0091225	0.000285087	0.0339899	0.0093667	0.00777728		-0.0143148	0.00354011	5.26341e-05	-0.0159858	0.00333112	1.59507e-06	KCNB2
19	q13.11	rs7257083	33443986:34443986	SSE	3.4011e-06	0.0178014	0.00383227	2.12482e-13	0.0260605	0.00354989	0.00178692	CED	0.000138111	0.0350303	0.00918949	0.00236086	0.0284161	0.00934486	0.0118431		0.0203538	0.00353703	8.68993e-09	0.0263576	0.00331852	1.98025e-15	PEPD	CEBPG, PEPD, CHST8
16	q21	rs2917685	63796852:64796852	AED	3.58373e-06	-0.0164555	0.00355078	0.994633	-2.21837e-05	0.00329809	0.000428551		0.161545	0.00757146	0.00540847	0.0665725	0.0101186	0.00551544	0.0686259		-0.00921862	0.00296825	0.00189803	0.00264881	0.00283062	0.349391	AC012322.1
11	q23.2	rs719802	112734679:113734679	CED	3.64298e-06	-0.0164725	0.00355706	0.00392383	-0.00951896	0.00330032	0.042494		0.343925	0.00543221	0.00573956	0.00833788	0.0156698	0.00593957	0.00596413		-0.0103939	0.0030235	0.000586639	-0.00357668	0.00288488	0.21505	TTC12	TTC12, ANKK1
21	q22.3	rs76040172	45988959:46988959	CED	3.73635e-06	-0.0354589	0.00766564	1.23549e-09	-0.0433312	0.00713168	0.0627071	SSE_Female	0.460572	-0.00886	0.0120068	0.000666692	-0.041684	0.0122485	0.0187717		-0.0277565	0.00646112	1.7396e-05	-0.0429142	0.0061631	3.32914e-12	LINC00162, SSR4P1	LINC00334, ITGB2-AS1, ADARB1
13	q21.1	rs9317002	58675727:59675727	CED	3.84683e-06	-0.0207971	0.00450187	0.00026851	-0.015273	0.00419129	0.0107898		0.00881604	-0.0143306	0.00547124	0.000206053	-0.0210138	0.00566132	0.0137591		-0.0181865	0.00347633	1.68122e-07	-0.0173055	0.00336859	2.7869e-07	CTAGE16P, DNAJA1P1
7	q11.23	rs6955671	73989486:74989486	SSE	3.99105e-06	0.0160439	0.00347872	2.08873e-10	0.0205266	0.00322999	0.0006759	AED	0.25773	0.00711095	0.00628291	0.00375972	0.018661	0.00643968	0.0242573		0.0139479	0.00304337	4.5822e-06	0.0201516	0.00288717	2.9579e-12	WBSCR16	NCF1C, RCC1L, NCF1, GTF2IRD2B, HIP1, STAG3L2, POM121C, PMS2P3, GTF2IP1, GTF2I, STAG3L1, PMS2P5
5	q21.3	rs13166413	105290223:106290223	CED	4.20118e-06	-0.0163246	0.0035478	0.0204135	-0.00764042	0.00329516	0.0728913		0.00336316	0.0180429	0.00615243	0.870042	-0.0010324	0.00631024	0.00624037		-0.00774835	0.00307342	0.0116993	-0.00622459	0.0029209	0.0330846	CTC-278L1.1, CTD-2285G11.1
15	q25.1	rs34994596	80491447:81491447	CED	4.25839e-06	-0.0174319	0.00379076	7.89952e-07	-0.0173496	0.00351349	0.0282711		0.0950669	0.0125011	0.00748879	0.0317317	-0.0163362	0.00760585	0.00341638		-0.0113266	0.00338214	0.000811247	-0.0171714	0.00318961	7.30381e-08	ABHD17C	ABHD17C
13	q31.1	rs1576655	79087841:80087841	CED	4.26111e-06	-0.0160914	0.00349935	6.88763e-05	-0.0129085	0.00324316	0.0964557		0.903677	-0.00195873	0.0161853	0.0198247	-0.0384448	0.0165018	0.0235669		-0.0154603	0.00342032	6.18039e-06	-0.0138582	0.00318228	1.33196e-05	CCT5P2, NIPA2P5
10	q22.1	rs3926930	71946296:72946296	CED	4.503e-06	-0.0182876	0.00398697	0.100312	-0.0060836	0.00370194	0.00369715		0.0287422	-0.0193178	0.0088326	0.366415	0.0081725	0.0090482	0.0115785		-0.018462	0.00363391	3.76491e-07	-0.00403942	0.00342627	0.238415	ADAMTS14	ADAMTS14
6	p22.1	rs13215804	27915572:28915572	CED	4.58642e-06	0.0193284	0.00421739	1.42949e-08	0.0222444	0.00392312	0.120298		0.00704086	-0.0178542	0.00662475	0.312692	-0.00690844	0.00684274	0.00896119		0.00860513	0.00355765	0.0155732	0.0150324	0.00340344	1.0016e-05	COX11P1	BTN1A1, HLA-J, ZKSCAN4, HIST1H4L, HLA-H, HLA-G, TRIM27, HLA-A, BTN3A2, ZSCAN12, HIST1H4K, ZNF603P, GUSBP2, FBRSL1, ZKSCAN3, ZSCAN16, HIST1H3I, PGBD1, VARS2, ZSCAN9, ZSCAN31, ZSCAN23
17	p13.3	rs4790841	1335482:2335482	CED	4.84917e-06	-0.0219876	0.00480986	4.66872e-16	-0.0361315	0.0044494	0.00247686		0.00270917	-0.0204866	0.00683075	0.0305566	-0.0151597	0.00700906	0.0445282		-0.0214901	0.00393271	4.64375e-08	-0.0301077	0.00375643	1.10155e-15	RPA1, RTN4RL1	RPA1, RTN4RL1
12	q24.31	rs181617194	121511598:122511598	CED	5.74498e-06	-0.0356545	0.00786085	5.93967e-06	-0.0328747	0.00725926	0.529065		0.76547	-0.0125911	0.0422085	0.0204117	-0.0964126	0.041579	0.0785713		-0.0348814	0.00772797	6.37209e-06	-0.0347541	0.00715109	1.17399e-06	KDM2B	MORN3
2	p14	rs2861685	67337553:68337553	CED	5.75955e-06	-0.0159146	0.00350914	1.93978e-05	-0.0139697	0.00327019	0.0194657		0.19744	-0.00708083	0.00549367	0.000532846	-0.0195352	0.00563958	0.00870279		-0.0133547	0.00295731	6.3066e-06	-0.0153702	0.00282898	5.53818e-08	AC010987.5
6	p21.31	rs2064317	34977032:35977032	CED	5.94537e-06	-0.01622	0.00358179	2.36652e-13	-0.0243495	0.00332335	0.0360604		0.00372546	0.0176543	0.00608617	0.198193	0.00810996	0.00630273	0.0808392		-0.00750585	0.00308689	0.0150356	-0.017288	0.00293971	4.08148e-09	TULP1	SRPK1, UHRF1BP1, DEF6, CLPS, TULP1, FKBP5, PARP4, C6orf106, TEAD3
17	p11.2	rs9902386	20780185:21780185	CED	5.99144e-06	-0.016604	0.00366789	0.0393966	-0.00702235	0.00340885	0.0556825		1.13221e-05	0.0538849	0.0122719	0.00704544	0.0336675	0.0124934	0.0450967		-0.0108234	0.00351428	0.00207105	-0.00420296	0.00328863	0.20124	KCNJ12	C17orf51, MAP2K3, KCNJ12
7	q11.23	rs7953	76923574:77923574	CED	7.37836e-06	-0.0158393	0.00353349	0.00346851	-0.00960015	0.00328448	0.10465		0.818313	-0.00213997	0.00931568	0.0177943	-0.0223469	0.00942921	0.0490629		-0.0141162	0.00330381	1.93106e-05	-0.0109794	0.0031017	0.000400415	TMEM60	GSAP, PHTF2, PTPN12, CCDC146, TMEM60, APTR, RSBN1L
18	q12.3	rs2161796	40250455:41250455	CED	7.515e-06	-0.0163822	0.0036578	1.42668e-09	-0.0205556	0.00339609	0.0698951	SSE_Female	0.351237	-0.00574878	0.00616686	8.00937e-05	-0.0249238	0.00631861	0.0136925		-0.0136148	0.00314602	1.50721e-05	-0.0215347	0.00299139	6.07111e-13	RIT2, SYT4
18	q21.32	rs17700028	57275684:58275684	CED	7.65287e-06	-0.0241909	0.00540601	0.000134637	-0.0191472	0.00501513	0.205652		0.169163	-0.011363	0.00826442	0.00590534	-0.0230069	0.00835663	0.111878		-0.0203468	0.00452408	6.87714e-06	-0.0201692	0.00430018	2.7277e-06	RNU6-567P, RP11-795H16.3
16	p11.2	rs11642933	29446708:30446708	CED	7.88754e-06	-0.0190367	0.00426035	1.64896e-13	-0.0292562	0.0039669	0.0791648	CED	0.359201	-0.00497475	0.0054256	9.65498e-05	-0.0217932	0.00558874	0.0154169		-0.0136733	0.00335078	4.49136e-05	-0.0267559	0.00323484	1.32669e-16	CTD-2574D22.2, TMEM219	HIRIP3, BOLA2B, C16orf92, PPP4C, SMG1P6, SMG1P2, INO80E, FAM57B, NPIPB3, DOC2A, YPEL3, TBX6, KCTD13, SMG1P5, SLAMF1, BOLA2-SMG1P6, ZNF212, CORO1A, GDPD3, MAPK3, PRDM8
6	q12	rs208490	66427774:67427774	CED	8.357e-06	0.0198055	0.00444471	0.000255487	0.0150758	0.00412272	0.181152		0.0860394	0.00997917	0.00581292	0.99396	4.53497e-05	0.00599031	0.0445531		0.0161801	0.00353083	4.59391e-06	0.0102447	0.00339613	0.00255638	NUFIP1P, AC002485.1	GPALPP1
6	p12.3	rs1325033	50468152:51468152	CED	8.62154e-06	0.0154606	0.00347486	1.10144e-07	0.0171645	0.00323288	0.0847565		0.177284	-0.00756393	0.00560626	0.000677947	-0.0197219	0.00580293	0.0308267		0.0090702	0.00295353	0.00213368	0.00842763	0.00282418	0.00284412	FTH1P5, RP3-437C15.2
1	p35.2	rs12739999	31707990:32707990	CED	9.85629e-06	0.020365	0.004607	0.000364553	0.0152867	0.00428853	0.0247687		0.451113	0.0073929	0.00981049	2.13592e-05	0.0423225	0.00995663	0.00189761		0.0180212	0.00417009	1.54942e-05	0.0195175	0.00393871	7.22175e-07	BAI2	ADGRB2
20	q11.22	rs143384	33525756:34525756	AED	9.95976e-06	0.0156858	0.00355029	0.302554	0.00340084	0.00329867	0.000429342		0.901429	-0.000863503	0.00697179	0.00684404	-0.0191428	0.00707819	0.0297738		0.0122779	0.0031637	0.00010408	-0.000621698	0.00298992	0.835283	GDF5	UQCC1, FAM83C, CPNE1, MMP24, MAP1LC3A, PROCR, SPAG4, GGT7, EDEM2, CEP250, GDF5, RBM39, SCAND1, EIF6
19	q13.41	rs4802779	51315243:52315243	CED	1.02478e-05	0.015271	0.00346123	0.0715962	0.00581033	0.00322494	0.00275052		0.0117392	-0.0139003	0.00551591	0.941471	0.00041433	0.0056432	0.0176514		0.0070297	0.00293182	0.0164972	0.00448193	0.00279998	0.109443	IGLON5	ETFB, AC063977.3, IGLON5, VSIG10L
10	q26.3	rs2172131	133478962:134478962	CED	1.02486e-05	-0.0154811	0.00350885	5.79987e-07	-0.0163195	0.00326525	0.0162597		0.721811	0.00203319	0.00571054	0.00450827	0.0166209	0.00585168	0.00283651		-0.0106809	0.00298959	0.000353321	-0.00849824	0.00285138	0.00287871	JAKMIP3	DPYSL4, JAKMIP3
9	p23	rs12156460	13663477:14663477	AED	1.02788e-05	-0.0167108	0.00378812	0.158945	-0.00497599	0.00353249	0.000924004		0.00290134	0.017435	0.00585414	0.276253	0.00657448	0.00603834	0.00469431		-0.00663307	0.00318036	0.0370114	-0.00203091	0.00304906	0.505362	NFIB	EIF2AK2, RASA2, TMEM68, YWHAQ, CCDC57, CIAO2A, PGRMC2, MEF2A, DDX52, HNRNPAB, RAB27A, LRRC27, JMJD1C, USP43, MYL6, SLC16A1, RAB6A, KIF23, NLK, HSPB1, RPA3, MYCBPAP, NTNG2, NR1D1, SENP1, MSL2, RNF7, LPIN1, PTP4A1, TBL1XR1, DAB1, CPT2, FAM49B, HIVEP1, UBTD2, ZBTB49, TLK1, TAF12, SLK, DCAF6, TAF15, HBP1, EXOC1, CEP135, RNF44, CTNNAL1, AK3, SFPQ, UBB, ZMYM5, LINC00240, MECR, MPHOSPH6, GORASP2, RCOR2,…
16	q12.2	rs74498370	53292464:54292464	CED	1.03815e-05	0.0403166	0.00914373	0.00844258	0.0224994	0.00854234	0.0303909		0.931262	-0.00148393	0.0172034	0.0260645	0.0391496	0.0175927	0.0491816		0.0311091	0.00807411	0.000116707	0.0256761	0.00768437	0.000833758	FTO	RBL2
12	q24.31	rs6489191	122654039:123654039	CED	1.06497e-05	0.0153287	0.00348089	0.00891037	0.00845589	0.00323299	0.0977028		0.908595	-0.000755393	0.00657938	1.24406e-05	-0.029707	0.00679755	0.00110533		0.0118112	0.00307682	0.000123644	0.00141574	0.0029196	0.62774	HCAR1	RILPL2, RSRC2, ZCCHC8, KNTC1, HCAR1, HCAR3
20	q13.2	rs6069625	54247469:55247469	CED	1.15038e-05	-0.0168562	0.00384237	0.120497	-0.00554759	0.00357287	0.0082308		0.198198	0.0070898	0.00550993	0.905351	-0.00067018	0.00563626	0.143569		-0.00902133	0.00315171	0.00420495	-0.00414947	0.00301764	0.16911	CBLN4, RNA5SP487
17	q21.32	rs12939514	45694264:46694264	CED	1.18321e-05	-0.0302217	0.00689867	4.35893e-08	-0.0352299	0.00643366	0.0892387		0.0579071	0.0207064	0.0109184	0.00142331	0.0361744	0.0113396	0.0228721		-0.0156911	0.00583206	0.00713482	-0.017842	0.00559576	0.00143017	SNX11	SNX11, HOXB3, LRRC46, HOXB2, HOXB4, TBKBP1, CDK5RAP3, HOXB-AS1, CBX1, SP6, SCRN2, SKAP1
1	p33	rs6697839	49891338:50891338	CED	1.30813e-05	0.0161862	0.0037134	2.95582e-07	0.0176561	0.00344413	0.0803999		0.99655	2.48424e-05	0.00574604	0.000465224	0.0206088	0.00588774	0.00270895		0.011425	0.0031188	0.000249024	0.0184089	0.00297285	5.9281e-10	AGBL4	AGBL4
3	p11.1	rs13062221	89278009:90278009	CED	1.39767e-05	-0.0152387	0.0035077	3.48972e-08	-0.0179942	0.0032627	0.125672		3.32939e-05	-0.0225401	0.00543101	0.043508	-0.0112232	0.00555919	0.0199094		-0.0173879	0.00294656	3.61136e-09	-0.0162594	0.00281387	7.54504e-09	RP11-91A15.1, U3
15	q25.2	rs6603002	84065601:85065601	CED	1.40166e-05	0.016109	0.00370855	9.18538e-06	0.0152895	0.00344697	0.00882597		0.610945	0.0036741	0.0072221	8.70476e-06	0.0327821	0.00737069	0.00239548		0.0135143	0.00329902	4.19516e-05	0.0184287	0.0031224	3.58928e-09	ADAMTSL3	UBE2Q2P1, ADAMTSL3, GOLGA2P7, GOLGA6L5P, NMB
12	p13.32	rs76895963	3884844:4884844	AED	1.49748e-05	0.0577662	0.0133434	0.531244	0.00775172	0.0123808	0.00600199		0.644409	0.00400242	0.00867176	0.0737848	-0.0158958	0.00889029	0.0080846		0.0199672	0.00727114	0.00603113	-0.00785076	0.00722138	0.276968	CCND2	CCND2
4	q24	rs201081507	102181041:103181041	CED	1.54453e-05	0.0183354	0.00424199	0.00104119	0.0129362	0.00394491	0.044897		0.659331	0.00369905	0.00839091	0.0445418	0.0173707	0.00864637	0.0540739		0.0153561	0.00378572	4.98492e-05	0.0137003	0.00358901	0.000134928	BANK1
8	q24.3	rs12681478	144441419:145441419	CED	1.99754e-05	0.0150731	0.0035339	0.0582106	0.0062099	0.00327851	0.0659662		0.859971	0.00108864	0.006171	0.0718064	-0.0114206	0.00634341	0.0787551		0.0116196	0.00306665	0.000151252	0.00249323	0.00291251	0.391975	EPPK1	EPPK1, NRBP2, SCRIB, GRINA, PLEC
15	q25.2	rs11073859	84583041:85583041	CED	2.01894e-05	-0.0149376	0.00350408	0.00158964	-0.0102808	0.00325565	0.0257438		0.0819453	0.0102738	0.00590598	0.00130553	0.0193551	0.00602027	0.01639		-0.00837345	0.00301358	0.00545988	-0.00357501	0.00286373	0.211893	UBE2Q2P1	UBE2Q2P1, GOLGA6L4, CSPG4P11, ADAMTSL3, GOLGA6L3, GOLGA2P7, SCAND2P, GOLGA6L5P, NMB
14	q32.32	rs3803286	102746470:103746470	CED	2.03831e-05	-0.0156426	0.00367129	3.37372e-07	-0.0174236	0.00341542	0.0309359		0.799089	0.00195555	0.00768301	0.0010819	0.0255391	0.0078136	0.0108033		-0.0123713	0.00331253	0.000187949	-0.0105317	0.00312951	0.000764665	TRAF3	TRAF3
12	q21.33	rs12427047	89713070:90713070	CED	2.15258e-05	-0.0172042	0.00404941	2.43635e-06	-0.0176804	0.00375099	0.0714418		0.19235	-0.00787505	0.0060406	0.00154596	-0.0194408	0.00614026	0.0179632		-0.0143117	0.00336356	2.0913e-05	-0.0181588	0.00320097	1.40399e-08	RNU6-148P, RP11-654D12.2	POC1B
13	q13.1	rs34916533	32574674:33574674	CED	2.15769e-05	-0.0152923	0.00359986	2.52606e-08	-0.0186784	0.00335238	0.0597401		0.442868	-0.00417499	0.00544066	0.00155521	-0.0176869	0.00558937	0.00290622		-0.0119072	0.00300219	7.30347e-05	-0.0184161	0.00287492	1.49617e-10	N4BP2L2	PDS5B, N4BP2L2, N4BP2L1
6	p21.31	rs12201824	34083020:35083020	CED	2.17471e-05	-0.0179586	0.00422926	2.66943e-11	-0.0261682	0.00392671	0.0150298	CED	0.00176939	-0.021023	0.0067237	0.0102299	-0.0176203	0.00686126	0.0265095		-0.0188273	0.00357994	1.44751e-07	-0.0240593	0.00340806	1.67075e-12	C6orf106	PACSIN1, UHRF1BP1, SNRPC, DEF6, TULP1, RPL10A, TCP11, C6orf106
1	p31.1	rs12039708	77447009:78447009	CED	2.22413e-05	0.0188406	0.00444225	2.18783e-09	0.0245553	0.00410384	0.0718001	SSE_Female	0.598702	0.00363134	0.00690011	0.000179854	0.0265551	0.00708875	0.008607		0.014384	0.00373513	0.000117642	0.0250573	0.00355161	1.72358e-12	AK5	AK5, FUBP1, PIGK
13	q14.3	rs7982447	53953811:54953811	CED	2.34422e-05	0.0181602	0.00429379	2.62945e-08	0.0221976	0.00398899	0.0934732		0.0154816	0.0175591	0.00725271	0.23821	0.00882925	0.00748565	0.0784011		0.0180042	0.00369483	1.10023e-06	0.019241	0.00352035	4.61216e-08	LINC00558, LINC00458
6	p22.1	rs201951562	26734973:27734973	AED	2.36319e-05	-0.0188961	0.00446969	0.00790383	-0.0110251	0.00415073	0.00521965		0.00876202	-0.0225156	0.00858928	0.175968	-0.0118547	0.0087599	0.0276893		-0.0196674	0.00396497	7.03883e-07	-0.0111772	0.00375096	0.00288409	PRSS16, XXbac-BPGBPG24O18.1
10	q24.2	rs12357890	99262693:100262693	CED	2.60041e-05	0.0146925	0.0034932	3.05045e-13	0.0236193	0.00323878	0.0475712		0.0253811	-0.0120509	0.0053903	0.000710141	-0.0188196	0.00555824	0.0792963		0.00678284	0.00293146	0.020678	0.0128621	0.00279836	4.30035e-06	CRTAC1	R3HCC1L, RAB1B
2	q11.2	rs6542923	100392516:101392516	CED	2.631e-05	-0.0154691	0.00368016	1.1543e-07	-0.0181477	0.00342357	0.0236631		0.0232225	0.0151575	0.0066777	3.21815e-07	0.0351248	0.00687234	0.0185907		-0.00833412	0.0032231	0.00971682	-0.00755569	0.00306438	0.0136765	LONRF2	LONRF2
6	p21.33	rs805262	31128733:32128733	AED	2.71436e-05	0.0145395	0.00346481	3.9075e-09	0.018978	0.00322298	0.0292567	AED	1.00762e-05	-0.0241961	0.00547891	0.00244103	-0.0171078	0.00564476	0.0589406		0.00347381	0.00292839	0.235521	0.0101061	0.00279888	0.000305291	C6orf47, GPANK1	EHMT2, C6orf48, ATF6B, DDR1, LINC00243, LST1, HLA-DQA1, STK19B, RNF5, DDX39B, ATP6V1G2, HLA-DRB5, HLA-DQB1-AS1, HSPA1B, GPANK1, AIF1, HCP5, C4A, CSNK2B, LY6G5B, IER3, TNXB, HSPA1L, HLA-DQB1, BAG6, HLA-DRB1, C4B, PSMB9, PRRC2A, CYP21A2, BAT2, LY6G5C, HSPA1A, SKIV2L, HLA-B, C6orf47, FLOT1
2	q13	rs4567941	112309219:113309219	AED	2.98192e-05	0.0159622	0.00382332	0.366506	0.00321723	0.00356267	0.00166807		0.808835	-0.00148144	0.0061234	0.00408959	-0.0179619	0.00625559	0.0298725		0.0110693	0.00324307	0.000642014	-0.00196981	0.00309581	0.524592	MERTK, TMEM87B	TMEM87B, MERTK
7	q36.1	rs7794796	150040196:151040196	CED	3.02561e-05	-0.0155047	0.00371669	0.0100279	-0.00886649	0.00344344	0.00581201		0.00255067	-0.0439378	0.014561	0.925192	-0.00136693	0.0145578	0.0193416		-0.0172439	0.00360123	1.68172e-06	-0.00846913	0.00335097	0.0114923	AOC1	TMEM176A, DBNL, KCNH2, TMEM176B, AOC1
11	p14.1	rs7942129	29724692:30724692	AED	3.03007e-05	-0.0171751	0.00411744	0.000557942	-0.0132139	0.00382862	0.0779266		0.0385761	-0.0115845	0.00559974	0.943666	0.000408748	0.00578443	0.0530339		-0.0152132	0.00331722	4.51538e-06	-0.00906399	0.00319263	0.00452508	RP4-562D20.2, FSHB	ARL14EP, RPL12P30, AC124657.1, FSHB
10	p11.22	rs2804477	33220175:34220175	CED	3.03577e-05	0.0200798	0.00481429	0.0519572	0.00875878	0.0045067	0.044728		0.0271882	-0.0134911	0.00610762	0.403409	0.00521567	0.00624215	0.0151864		0.00721471	0.00378091	0.0563664	0.00754474	0.00365391	0.0389381	RP11-90B22.1, RP11-476F14.1	NRP1
1	p31.1	rs34517439	77950517:78950517	CED	3.20034e-05	0.0208267	0.00500781	3.22811e-13	0.0336738	0.00462232	0.00694882	SSE_Female	0.111346	0.0131178	0.00823873	2.37054e-07	0.043787	0.00847188	0.00234918		0.0187469	0.00427929	1.1822e-05	0.0359938	0.00405765	7.27641e-19	GIPC2	FUBP1, PIGK
2	p25.3	rs56046241	57624:1057624	CED	3.223e-05	-0.0276941	0.00666167	7.11223e-07	-0.0309861	0.00624917	0.0066126		0.876382	0.00424093	0.0272626	0.00438934	-0.079888	0.0280418	0.0157347		-0.0258948	0.00647128	6.29445e-05	-0.0332998	0.00609954	4.77766e-08	AC093326.2, AC093326.3
2	q34	rs3791702	211780780:212780780	CED	3.54329e-05	0.0155848	0.00376853	2.55067e-07	0.0180626	0.00350448	0.0384001		0.896586	0.00500126	0.0384784	0.046084	0.078073	0.0391406	0.0225032		0.0154842	0.00375059	3.65156e-05	0.0185399	0.00349052	1.08731e-07	ERBB4
6	p12.3	rs2474896	51260527:52260527	CED	3.70317e-05	0.015213	0.00368768	5.86503e-09	0.019885	0.00341618	0.185099		0.00119856	0.0188399	0.00581568	0.234318	0.00706899	0.00594369	0.0378957		0.0162531	0.00311435	1.80116e-07	0.0167026	0.00296182	1.70743e-08	PKHD1
3	q23	rs724016	140605570:141605570	CED	3.74773e-05	0.0147109	0.00356834	0.000119909	0.0127388	0.00331188	0.0417779		0.0125677	-0.0151264	0.00606044	0.354768	-0.00571903	0.00618012	0.0352131		0.00702985	0.00307493	0.0222434	0.0086207	0.00291914	0.00314532	ZBTB38	ALPL, CD93, ZBTB38, VIL1, HEXIM2, PTPRN2, HCG11, KRT23, RAD51B, SPDYC, FBXL13
16	q24.3	rs55637757	89035888:90035888	CED	3.75833e-05	-0.0213256	0.00517365	0.000393885	-0.0170685	0.00481588	0.030935		0.00445352	0.01565	0.00550219	0.926695	-0.000518283	0.00563325	0.0145719		-0.00397462	0.00376912	0.291644	-0.0100801	0.00366054	0.00589201	ANKRD11	SPATA2L, DBNDD1, ZNF276, SPG7, VPS9D1, RPL13, CDH15, GAS8, MC1R, ANKRD11, TCF25
1	p31.1	rs7525548	74501474:75501474	CED	3.76039e-05	-0.0144013	0.0034939	2.17822e-08	-0.0181852	0.00324884	0.106381	SSE_Female	0.673205	0.00231286	0.00548385	0.00319595	0.0166782	0.00565669	0.0258838		-0.00957548	0.00294665	0.00115562	-0.00953761	0.00281725	0.000710657	TNNI3K	LRRC53, CRYZ, FPGT
18	q21.32	rs193239997	58139547:59139547	CED	3.77331e-05	-0.0534551	0.0129712	4.12177e-12	-0.08336	0.012023	0.0453559	AED	0.130034	-0.0308619	0.0203843	0.0205074	-0.0485153	0.0209386	0.0426268		-0.0469434	0.0109435	1.7897e-05	-0.0747201	0.0104264	7.69809e-13	RP11-325K19.1, CDH20
8	q22.1	rs1023767	95030969:96030969	CED	3.98738e-05	-0.0142173	0.00346061	0.00414535	-0.00922154	0.00321653	0.0307084		0.415326	0.00439702	0.00539798	0.000789972	0.0185169	0.00551667	0.0106105		-0.00879526	0.00291333	0.0025363	-0.00218413	0.00277871	0.431854	KIAA1429	AC023632.4, RAD54B, VIRMA, AC023632.2, FSBP
16	p12.1	rs7185291	24214679:25214679	CED	4.043e-05	0.0165538	0.00403247	4.87877e-07	0.0188215	0.00374095	0.106999		0.921677	0.000908402	0.00923899	0.00137661	-0.0307423	0.00960778	8.54255e-05		0.0140503	0.00369578	0.000143704	0.0122965	0.00348602	0.000419686	AC012317.1, TNRC6A	SLC5A11, TNRC6A
5	q33.3	rs17055653	157418528:158418528	AED	4.18695e-05	0.0162574	0.0039681	1.98525e-09	0.0221897	0.00369871	0.0662517		0.0227159	0.0135799	0.00596058	0.00135314	0.0196321	0.00612606	0.10619		0.0154352	0.0033031	2.96918e-06	0.0215064	0.00316634	1.10437e-11	RP11-32D16.1
3	q26.31	rs4894803	171300256:172300256	CED	4.2651e-05	-0.0145095	0.00354518	0.191684	-0.00431036	0.0033014	0.01846		0.764975	0.00471136	0.0157593	0.0473766	0.0325011	0.0163901	0.110816		-0.0135837	0.00345874	8.58906e-05	-0.00287506	0.0032364	0.374352	FNDC3B
6	p21.32	rs9277990	32808607:33808607	CED	4.40955e-05	0.0181541	0.00444408	1.89514e-06	0.0197495	0.00414518	0.158948		0.000578714	-0.0192315	0.00558774	0.22572	-0.00696966	0.00575304	0.0377703		0.0036687	0.00347816	0.291525	0.0106186	0.00336313	0.00159208	MYL8P, LYPLA2P1	ZBTB22, B3GALT4, RPS18, WDR46, DAXX, TAPBP, HLA-DPB2, CUTA, VPS52
8	p12	rs10954772	30363938:31363938	CED	4.42088e-05	-0.0153175	0.00375023	2.92989e-08	-0.0193749	0.00349362	0.0388315		0.00459904	0.0155003	0.00546931	0.464938	0.0040726	0.00557321	0.00528121		-0.00546183	0.00309296	0.0774145	-0.0127603	0.00296011	1.62686e-05	PURG	PURG, GSR
6	p21.32	rs9268644	31908044:32908044	CED	4.55258e-05	0.0144344	0.00353992	0.0664672	0.00602785	0.00328445	0.00387008		2.6325e-05	0.0235265	0.00559657	0.136773	0.00850626	0.00571678	0.00224934		0.0170325	0.0029917	1.24639e-08	0.00664291	0.00284789	0.0196707	HLA-DRA	FAM8A1, HLA-DQA1, ARHGAP24, DEF8, HLA-H, HLA-G, HLA-DRB5, TRIM56, HLA-DQB1-AS1, SQSTM1, HLA-C, HCP5, TNXA, TINF2, RPL34, CYP21A1P, SLC44A4, TNXB, LIMS1, TOMM22, HLA-DQB1, HLA-DRA, DDAH2, HLA-DRB1, AOAH, HLA-DQB2, CSNK2A1, TOM1, HLA-DQA2, TSBP1, PRKRA, NOTCH4, ZNF20, SKIV2L, SSRP1, HLA-DRB6, DHX30
6	p22.2	rs79089106	25786750:26786750	CED	4.72544e-05	-0.043811	0.0107672	0.000270594	-0.0369197	0.0101372	0.37679		0.145425	-0.0275386	0.018915	0.212801	-0.0246298	0.0197684	0.197669		-0.0398286	0.00935735	2.07748e-05	-0.0343608	0.00902034	0.000139384	HIST1H4H, HIST1H3PS1
9	q31.1	rs150688270	102936617:103936617	CED	4.79679e-05	0.0458521	0.0112786	0.0188797	0.0246127	0.0104828	0.00112038		0.713533	0.0202999	0.0552953	0.00580561	0.150395	0.0545165	0.0447578		0.0448315	0.0110511	4.97582e-05	0.0290976	0.0102942	0.00470459	MURC, RP11-394D2.1	INVS
6	q21	rs2253310	108388593:109388593	CED	4.93064e-05	-0.0174398	0.00429657	1.72802e-06	-0.0190764	0.00398835	0.00735161		0.617255	-0.00465684	0.00931836	0.0826596	-0.0166868	0.00961498	0.0924518		-0.0151986	0.00390178	9.80772e-05	-0.0187256	0.00368398	3.71567e-07	FOXO3
2	p25.3	rs10208700	97626:1097626	CED	4.93171e-05	0.0145465	0.00358382	0.00414024	0.00954989	0.00333061	0.0207585		0.0255393	0.0163513	0.00732175	0.140681	0.0109439	0.00742822	0.0674341		0.0148953	0.0032189	3.70183e-06	0.00978323	0.0030391	0.00128586	AC093326.3, TMEM18	SH3YL1
12	q21.33	rs704061	89271903:90271903	AED	5.20394e-05	0.014063	0.00347545	1.1725e-11	0.0219779	0.00323968	0.0646546	SSE_Female	0.476728	0.00384811	0.00540782	4.06323e-05	0.02262	0.00551131	0.00752506		0.0110772	0.00292372	0.000151418	0.0221428	0.00279289	2.22231e-15	RP11-1109F11.5, POC1B	POC1B
2	p25.3	rs61080649	184057:1184057	AED	5.22686e-05	-0.01606	0.00396998	1.99927e-08	-0.020699	0.00368815	0.0200827		0.00468928	-0.0483404	0.0170945	0.071678	-0.032158	0.0178536	0.162863		-0.0177119	0.00386707	4.6454e-06	-0.021168	0.00361189	4.61075e-09	AC092159.2	LINC01115
3	p22.3	rs13062093	35167057:36167057	CED	5.5555e-05	0.0150611	0.00373627	8.40747e-07	0.017125	0.00347657	0.0308441		0.00467489	-0.0156248	0.00552344	0.0921545	-0.00956556	0.00567966	0.0256644		0.00542798	0.00309474	0.0794406	0.00985031	0.00296518	0.000893751	RNU6-243P, ARPP21	ARPP21
18	q21.32	rs12963186	57413703:58413703	AED	5.62608e-05	0.055819	0.0138575	0.00209892	0.0388671	0.012636	0.0419705		0.398996	0.0167158	0.0198189	0.0649366	0.0381815	0.0206862	0.177907		0.0429791	0.0113567	0.000154042	0.0386808	0.0107834	0.000334399	RP11-795H16.2, RP11-396N11.1
7	q11.23	rs77773460	76283917:77283917	AED	5.75191e-05	0.0401871	0.00998967	0.0147396	0.0223634	0.00917008	0.0129308		0.315224	0.00582361	0.00579847	0.00111479	0.0193216	0.00592677	0.015708		0.0144836	0.00501489	0.00387552	0.0202178	0.00497762	4.8707e-05	CCDC146	CCDC146
13	q14.3	rs9568867	53607352:54607352	SSE	5.89153e-05	0.0209579	0.00521703	5.45686e-09	0.028282	0.00484872	0.00326458	AED	0.0184144	0.0189895	0.00805563	6.06851e-05	0.0334842	0.00834903	0.0246606		0.0203763	0.00437893	3.26742e-06	0.029594	0.00419292	1.68804e-12	AL450423.1, LINC00558
10	p13	rs4027773	16251164:17251164	CED	5.99115e-05	0.0149219	0.00371814	0.00134131	0.011063	0.0034496	0.0200275		0.0112435	-0.014686	0.00579288	0.0256026	-0.0133641	0.00598676	0.263944		0.00628326	0.00312906	0.0446395	0.0049744	0.00298892	0.0960569	RSU1	RSU1
5	p14.3	rs111666612	21977433:22977433	CED	6.25003e-05	-0.0172677	0.00431339	0.964793	-0.000176837	0.00400625	7.04293e-05		0.879907	-0.000957816	0.00633944	0.0236506	-0.0147696	0.006527	0.00485686		-0.0121064	0.00356618	0.000686823	-0.00417014	0.00341437	0.221954	CDH12
5	q13.1	rs56194430	67324690:68324690	CED	6.41707e-05	-0.0146201	0.00365775	0.113425	-0.00537502	0.00339549	0.0468667		0.0132493	-0.0142898	0.0057687	0.632272	0.00282286	0.00589896	0.0190368		-0.0145254	0.00308911	2.57467e-06	-0.00333483	0.0029428	0.257124	CTC-537E7.1
6	p22.1	rs9257424	28435259:29435259	AED	6.55838e-05	0.0182945	0.00458294	0.18813	0.00559654	0.00425225	0.0273448		0.00236718	-0.0181893	0.0059832	0.677211	-0.00255041	0.00612675	0.00310524		0.00480411	0.00363828	0.18669	0.00294797	0.00349332	0.398733	C6orf100, KRT18P1	HLA-F, BTN3A2, HIST1H4L, ZSCAN9, TRIM27, HLA-G, ZNF311, IFITM4P
1	q22	rs6685228	155986009:156986009	CED	6.67293e-05	0.0228347	0.0057262	0.0276498	0.0117512	0.00533601	0.0694957		0.280719	0.00692922	0.00642353	0.000560007	-0.0225974	0.00654892	0.000643767		0.0157919	0.00427439	0.000220298	-0.00195381	0.00413671	0.636706	RP11-284F21.8, IQGAP3	GPATCH4, NAXE, TTC24
3	q23	rs2035936	140798124:141798124	CED	6.8395e-05	0.0305693	0.00767705	1.21632e-08	0.0404847	0.00710548	0.0277694	CED	0.00971268	0.0277708	0.0107387	0.00149389	0.0346461	0.0109085	0.19016		0.0296228	0.00624527	2.10331e-06	0.0387454	0.00595381	7.63271e-11	RASA2	ZBTB38
1	p36.33	rs72634819	1096500:2096500	CED	7.02435e-05	-0.0157207	0.00395434	3.96725e-09	-0.0215891	0.00366797	0.0198368		0.000327002	-0.0215966	0.00601024	0.771728	-0.00179315	0.00618076	0.0108074		-0.0174958	0.00330346	1.18233e-07	-0.0164331	0.00315434	1.89147e-07	SLC35E2B	FNDC10, SLC35E2A, FO704657.1, MIB2, SLC35E2B, AL031282.1, CDK11B
6	q25.3	rs9365169	160466347:161466347	CED	7.15272e-05	-0.0137513	0.00346273	0.238027	-0.00379534	0.00321656	0.0015688		0.000572665	0.020957	0.00608402	0.606373	-0.00322625	0.00626137	0.0028028		-0.00525904	0.00300944	0.0805479	-0.00367651	0.00286111	0.198794	LPA	LPA, SLC22A3
11	p14.2	rs11029806	26575050:27575050	CED	7.32649e-05	-0.0145992	0.00368153	0.155624	-0.00486824	0.00342846	0.0268433		0.959274	0.000282509	0.00553231	0.0217483	0.0130116	0.00566997	0.0153142		-0.0100317	0.00306492	0.00106388	-8.11828e-05	0.00293382	0.977924	RP11-1L12.3	FIBIN, BBOX1
2	p21	rs34996358	46349495:47349495	CED	7.61316e-05	-0.014308	0.00361644	4.56031e-08	-0.0184392	0.00337229	0.130056		1.39252e-06	-0.0276617	0.00573067	0.371138	-0.00525334	0.0058739	0.00316066		-0.0181114	0.00305837	3.18216e-09	-0.0151704	0.00292458	2.13449e-07	CRIPT	PIGF, ATP6V1E2, RHOQ, CRIPT, SOCS5
3	p21.31	rs13086611	48885417:49885417	AED	7.72046e-05	-0.0148952	0.00376806	2.54225e-09	-0.0208178	0.00349351	0.00403763		0.00442895	0.0154432	0.00542615	0.177278	0.00745	0.00552175	0.019978		-0.00502491	0.003095	0.10447	-0.0127372	0.00295225	1.60047e-05	USP4, GPX1	APEH, COL7A1, GMPPB, NICN1, CRBN, INKA1, IP6K1, HYAL3, BSN, USP4, QRICH1, ATRIP, GPX1, DCUN1D1, RBM6, WDR6, IP6K2, TREX1, KLHDC8B, SHISA5, WDR53, DAG1, AMT, UBA7, MAP3K13, SLC26A6
7	p22.3	rs3800872	1610272:2610272	CED	8.20141e-05	-0.0166167	0.00421899	2.98533e-11	-0.0260075	0.00391227	0.004107		0.21669	0.00798414	0.00646279	0.00573394	-0.0183679	0.00664838	0.00125071		-0.00926552	0.00353284	0.00872403	-0.0240425	0.0033718	1.00024e-12	MAD1L1	GNG4, MAD1L1, NCKAP5, PDE4DIP, STARD3
6	p22.1	rs2248162	29415061:30415061	CED	8.21852e-05	-0.0139221	0.0035353	1.28686e-07	-0.0173714	0.00328948	0.122437		0.175167	-0.0142277	0.0104939	0.00013483	-0.040527	0.0106152	0.00885464		-0.0139532	0.00335029	3.11637e-05	-0.0194002	0.00314207	6.64491e-10	HLA-A, HLA-W	TSSC4, DDR1, MICE, AL645929.1, HLA-U, BTN1A1, LINC00243, HLA-J, TPD52L2, HLA-H, ZNRD1ASP, HLA-G, HCG4, IFITM4P, HLA-A, BTN3A2, KIT, ZNRD1, KRTCAP2, HCG4B, HLA-C, HLA-V, ZFP57, HLA-W, FLOT1, HLA-F-AS1, TRIM26, HLA-L, HLA-F, MICD, VARS2, PPP1R11, B2M, HCG4P6
5	q14.3	rs6870983	87197533:88197533	CED	8.76361e-05	-0.016732	0.00426554	6.20519e-08	-0.0214387	0.00396059	0.00145149		0.00580979	-0.0247262	0.00896358	0.0389991	-0.0192616	0.00933097	0.0246784		-0.0182081	0.00385166	2.2749e-06	-0.0211063	0.00364577	7.06909e-09	TMEM161B-AS1	MEF2C, TMEM161B-AS1
18	p11.32	rs60764613	1339911:2339911	CED	9.75719e-05	0.0192033	0.00492815	6.18656e-09	0.0266969	0.00459349	0.175171		0.256382	0.00610254	0.00537667	0.0114376	0.0139345	0.00550954	0.0922808		0.0132221	0.00363296	0.0002732	0.0214634	0.00352812	1.17563e-09	CTD-2015H3.1, RP11-161I6.2
19	p13.2	rs62621197	8170147:9170147	AED	0.000105303	-0.0362667	0.00935159	0.558912	-0.00502825	0.00860326	0.0139572		0.325263	0.00696861	0.00708398	0.195757	0.00939744	0.00726369	0.285268		-0.00879531	0.00564675	0.119331	0.00339387	0.00555009	0.54087	ADAMTS10
15	q25.2	rs28557338	84353685:85353685	CED	0.000105395	0.0154803	0.00399191	0.163017	0.00518256	0.00371509	0.0288823		0.136062	0.00953274	0.00639501	0.00109526	0.0213355	0.00653448	0.00297613		0.0138126	0.00338632	4.52387e-05	0.00912833	0.00322962	0.00470681	UBE2Q2L, CSPG4P11
2	q33.3	rs4482463	204875909:205875909	CED	0.000107664	-0.0253764	0.00655258	1.74704e-07	-0.0318483	0.00609583	0.0209582		1.05091e-05	0.0324642	0.00736628	0.0992787	0.0124456	0.00755014	0.0101961		0.000174041	0.00489588	0.971642	-0.0143689	0.00474292	0.00244917	AC016903.2, PARD3B
6	p21.33	rs7769158	31299494:32299494	CED	0.000107666	-0.0198529	0.00512634	3.73795e-09	-0.0281149	0.00476874	0.0263235	CED	0.0434575	-0.0165643	0.00820275	9.49755e-05	-0.0330383	0.00846386	0.00757606		-0.0189292	0.00434722	1.33473e-05	-0.0293012	0.00415468	1.75619e-12	HSPA1B, C6orf48	HLA-DRB5, VWA7, LY6G5B, PPT2, SLC44A4, GPANK1, HSPA1A, LY6G5C, SKIV2L, HLA-B, HLA-C, LY6G6F, HCP5, BAG6, HLA-DRB6, NELFE
1	p21.3	rs588660	96386604:97386604	CED	0.000113688	0.0138697	0.0035937	5.56418e-10	0.0206981	0.00333698	0.0367244	CED	9.74119e-05	-0.0352528	0.00904515	0.00417978	-0.0267145	0.00932631	0.0267134		0.00717272	0.00333976	0.0317396	0.0153171	0.00314192	1.08764e-06	UBE2WP1, EEF1A1P11
1	p13.2	rs12406530	112617213:113617213	CED	0.000114189	-0.0187627	0.00486284	0.00497988	-0.0126355	0.00449922	0.00387486		0.00415651	-0.0345626	0.0120585	0.174934	-0.0169264	0.0124776	0.00443356		-0.0209728	0.00450993	3.31363e-06	-0.0131292	0.00423247	0.00192205	ST7L	MOV10, ST7L, WNT2B
13	q34	rs1886558	111482615:112482615	CED	0.000127862	-0.0134295	0.00350583	3.98751e-08	-0.0178728	0.00325455	0.061687		0.00291468	0.021597	0.00725504	0.128321	0.0113157	0.00744071	0.0327702		-0.00679884	0.0031566	0.0312521	-0.0131853	0.00298179	9.78133e-06	TEX29	TEX29, ARHGEF7
14	q32.2	rs3994992	99179507:100179507	CED	0.000138343	-0.0133705	0.00350822	0.00098396	-0.0107425	0.00326011	0.24131		0.00157314	0.0178946	0.00566085	0.472639	0.00417042	0.00580678	0.0188793		-0.00469465	0.002982	0.115412	-0.00716843	0.00284273	0.0116798	BCL11B	BCL11B
20	q13.2	rs6021948	50600420:51600420	SSE	0.000144707	-0.0141031	0.00371127	1.22125e-08	-0.0196329	0.0034462	0.00108892		0.205062	-0.00762672	0.00601815	0.00292555	-0.0184119	0.00618755	0.0575053		-0.0123188	0.00315891	9.63167e-05	-0.0193438	0.00301073	1.319e-10	RP4-723E3.1	TSHZ2, ZFP64
14	q32.12	rs6575340	93523972:94523972	CED	0.000146655	0.0137024	0.00360897	1.96652e-09	0.0201359	0.00335551	0.000205295	CED	0.000100575	-0.0218011	0.00560484	0.0017508	-0.0179887	0.00574764	0.0141646		0.00329662	0.00303434	0.277286	0.0104449	0.00289782	0.000312887	UNC79	UBR7, BTBD7
2	p23.3	rs1260326	27230940:28230940	OED	0.000147971	0.0147896	0.00389759	0.0551502	-0.00695983	0.00362925	6.92004e-06		0.0621075	-0.0155971	0.00836042	0.839582	-0.00174534	0.00862193	0.0551858		0.00936449	0.00353257	0.00802771	-0.00617497	0.00334499	0.064887	GCKR	ABCG1, FNDC4, ABCA1, PPM1G, IFT172, NRBP1, SLC5A6, GPN1, GCKR, ATRAID, MYLIP, IGFBP1, KRTCAP3, SNX17
12	q24.31	rs147935170	123382462:124382462	CED	0.000150023	-0.0310089	0.00817935	8.18224e-07	-0.0370251	0.00750845	0.198423		0.789292	-0.00179641	0.00672226	0.0943699	-0.0115155	0.0068839	0.0923156		-0.0135733	0.00519337	0.00895996	-0.0231654	0.00507411	4.98508e-06	SETD8	ABCB9, TCTN2, RILPL2, KMT5A, CDK2AP1, DDX55
1	q22	rs76102184	155671486:156671486	CED	0.000150221	0.0444456	0.0117246	5.00216e-09	0.0630651	0.0107852	0.134284	AED	0.0854094	0.0313754	0.0182396	0.000350458	0.0681694	0.0190677	0.0815966		0.040624	0.00986269	3.80588e-05	0.0643023	0.00938755	7.39817e-12	SLC25A44	SEMA4A, GLMP, GBAP1, SMG5, TMEM79, PAQR6, THBS3, SLC25A44
17	q12	rs2306593	34366546:35366546	CED	0.000175744	-0.0130298	0.0034731	2.70156e-10	-0.0203473	0.00322189	0.0554301		0.0462712	-0.0108813	0.00545978	0.00248771	-0.016873	0.00557781	0.137361		-0.0124109	0.00293044	2.28395e-05	-0.0194781	0.00278991	2.91762e-12	MYO19	ZNHIT3, DHRS11, MRM1, PIGW, GGNBP2, MYO19
12	p13.32	rs11062587	2842708:3842708	CED	0.00017925	-0.0230755	0.00615893	0.000680618	-0.0195101	0.00574277	0.392997		0.00172072	-0.0302433	0.00964734	0.589317	0.00531255	0.00984115	0.00439786		-0.025151	0.00519124	1.26687e-06	-0.0132045	0.00496002	0.00776334	TSPAN9
9	q22.2	rs10465231	91683413:92683413	CED	0.000187322	0.0130668	0.00349789	4.33651e-10	0.0202957	0.00325161	0.0227473		0.369745	-0.00483398	0.00538927	0.00143773	0.0176335	0.00553263	0.00171962		0.00776101	0.00293406	0.00816565	0.0196122	0.00280331	2.63196e-12	SEMA4D, GADD45G	SEMA4D, SECISBP2
19	p13.11	rs10404726	18334514:19334514	CED	0.000218231	-0.0128361	0.00347204	6.05724e-10	-0.019964	0.00322559	0.0519897		0.000142926	-0.0255057	0.00670584	0.289413	-0.00726298	0.00685559	0.0285678		-0.0155145	0.00308327	4.8579e-07	-0.0176619	0.00291867	1.43621e-09	CRTC1	ELL, UBA52, CRTC1, REX1BD, LRRC25
2	p16.1	rs17049738	58526222:59526222	CED	0.000219992	-0.0245279	0.0066382	1.59736e-08	-0.0345127	0.00610736	0.0636546		0.0482895	-0.0132852	0.00672709	0.00557632	-0.0192192	0.00693369	0.0660585		-0.0189813	0.00472503	5.88975e-05	-0.0278311	0.004583	1.25791e-09	LINC01122
6	q16.3	rs314279	104902083:105902083	AED	0.000220721	-0.0179586	0.00486139	0.00142623	-0.0144054	0.00451675	0.00533481		0.0104475	0.0144316	0.00563556	0.723725	-0.00203108	0.00574584	0.00311612		-0.00413942	0.00368105	0.260792	-0.00967928	0.00355095	0.00641408	LINC00577, LIN28B
1	q31.1	rs815163	189794726:190794726	CED	0.000224633	-0.0128858	0.00349241	1.31321e-08	-0.0184188	0.00324013	0.147154	SSE_Female	0.569089	0.00319349	0.00560852	0.000554571	0.0199212	0.00576894	0.00171066		-0.00839308	0.00296462	0.0046391	-0.00922468	0.00282504	0.00109338	RP11-547I7.1
6	p12.3	rs1492612	49846543:50846543	CED	0.000229325	-0.0194368	0.00527544	2.95512e-09	-0.0291722	0.00491582	0.00405907		0.693301	0.00484529	0.0122858	0.00347856	0.0367275	0.0125688	0.00286971		-0.0156567	0.00484745	0.00123843	-0.020429	0.00457812	8.10791e-06	RP11-397G17.1, RP11-524K22.1
14	q31.1	rs10130216	79399861:80399861	CED	0.000238873	0.013271	0.00361216	4.98806e-07	0.0167605	0.00333413	0.180214		0.018678	-0.013258	0.00563688	0.0042214	-0.0165052	0.00576845	0.279713		0.00554842	0.0030413	0.0680982	0.00843016	0.00288664	0.0034957	NRXN3
3	p21.31	rs73078367	48208347:49208347	CED	0.000241941	-0.01989	0.00541854	8.06391e-07	-0.0247314	0.00501246	0.0264763		0.0177035	-0.0438119	0.0184714	0.439018	0.0145916	0.0188556	0.0134618		-0.0217854	0.00519944	2.79008e-05	-0.0221359	0.00484422	4.88745e-06	NCKIPSD	WDR6, AMT, IP6K2, GPX1, P4HTM, CELSR3, DCUN1D1, NICN1, LAMB2, CRBN
1	q22	rs61813324	155549877:156549877	CED	0.000243215	0.0188133	0.00512711	6.99027e-10	0.0294803	0.00478062	0.0390985	AED	0.050465	0.0148336	0.00758334	9.96682e-06	0.0344543	0.00779785	0.0356284		0.0175648	0.00424743	3.54333e-05	0.0308391	0.00407566	3.82983e-14	MEX3A	LMNA, MEX3A, SEMA4A, GBAP1, TMEM79, THBS3, CCT3
6	p22.1	rs7745768	28814964:29814964	CED	0.000262582	0.0165128	0.00452437	1.5652e-07	0.0221038	0.00421432	0.0218437		0.347235	-0.00535955	0.00570177	0.010576	0.0149974	0.00586632	0.00260494		0.00806198	0.00354414	0.022922	0.0196847	0.00342267	8.85734e-09	DDX6P1, OR5V1	HLA-J, TRIM31, HLA-H, ZNRD1ASP, HLA-G, HCG4, MOG, IFITM4P, HLA-A, TUBB, BTN3A2, RYR1, TRIM10, ZNRD1, ZFP57, GABBR1, IER3, HLA-K, AL671277.2, ZDHHC20P1, ZKSCAN3, HLA-F, VARS2, DDX39BP2, ZSCAN31
2	q34	rs10184221	212909014:213909014	CED	0.000277932	-0.0143102	0.00393665	2.30978e-05	-0.0154919	0.00366002	0.00354091		0.0274329	0.0123005	0.00557743	0.479687	-0.00403319	0.00570617	0.0080372		-0.00546153	0.00321621	0.0894844	-0.0121518	0.00308075	7.99902e-05	ERBB4, AC079610.1	SH3GLB2, ERBB4
5	q12.2	rs1503526	62520706:63520706	CED	0.000279701	0.0126151	0.0034719	2.41109e-10	0.0203955	0.00322056	0.0329568	AED	0.00330982	-0.0159288	0.00542237	0.350769	-0.00517763	0.0055488	0.000756658		0.00431548	0.00292389	0.139961	0.0139515	0.00278539	5.47731e-07	CTD-2049O17.1, RP11-158J3.2
1	q31.3	rs581571	194622910:195622910	CED	0.000294976	-0.0129418	0.00357533	8.37044e-08	-0.017767	0.00331526	0.0205177		0.622777	-0.0026942	0.00547687	0.00567843	-0.0155282	0.0056141	0.026361		-0.00987968	0.00299387	0.000966955	-0.0171881	0.00285468	1.73291e-09	AL357932.1, RP11-476B1.1
2	p16.1	rs4671328	58435282:59435282	CED	0.000301917	0.0138759	0.00383978	1.17501e-11	0.0242445	0.00357395	0.0308765		0.000221848	0.0207368	0.00561492	0.379231	0.0050534	0.00574691	0.0254697		0.0160621	0.00316953	4.02748e-07	0.0188923	0.00303494	4.81718e-10	LINC01122
3	q26.2	rs1879442	170227351:171227351	CED	0.000302105	-0.0129655	0.003588	3.13652e-07	-0.0170563	0.00333442	0.0450316		0.0867943	0.009964	0.00581803	0.00545676	0.0164323	0.00591324	0.00329257		-0.00664769	0.00305395	0.0294992	-0.00897688	0.00290447	0.00199679	SLC2A2	RPL22L1, EIF5A2, SLC2A2
3	p14.3	rs59990236	55090514:56090514	CED	0.000302669	0.0158102	0.00437583	0.0555825	0.00778334	0.00406588	0.12012		0.0202861	0.0146083	0.00629361	0.999177	6.70153e-06	0.00649395	0.0478146		0.0154185	0.00359277	1.77433e-05	0.00559335	0.00344615	0.104574	ERC2	ERC2
18	q21.32	rs117758180	57309744:58309744	AED	0.000318076	0.0403676	0.0112126	3.67577e-06	0.0485476	0.0104876	0.107222		0.137028	0.0540848	0.0363722	0.0109344	0.0883858	0.0347305	0.182398		0.0415581	0.010715	0.000105108	0.0518767	0.0100398	2.37768e-07	RP11-795H16.3
18	q22.1	rs2156058	62812311:63812311	CED	0.000318588	-0.0134727	0.00374266	6.60549e-06	-0.0156879	0.00348145	0.0803923		0.834103	-0.00121813	0.00581601	0.00184002	0.0185164	0.00594406	0.00299684		-0.00988408	0.00314731	0.00168668	-0.00695128	0.0030041	0.0206715	RP11-775G23.1	CDH7
2	p23.3	rs116789887	24691843:25691843	CED	0.000339768	-0.0214941	0.00599891	3.77372e-11	-0.0370135	0.00559701	0.0119701		0.00593808	-0.0670763	0.0243793	0.788622	0.00673952	0.0251379	0.00350242		-0.0240965	0.00582515	3.52452e-05	-0.0349469	0.00546323	1.58716e-10	AC013267.1	ADCY3, EFR3B, DNAJC27, POMC
21	q22.3	rs400997	46064154:47064154	CED	0.000345085	0.0125668	0.00351131	6.41102e-10	0.0201333	0.00325765	0.108624	CED	0.141254	0.00825046	0.00560809	2.69155e-05	0.0242597	0.00577807	0.0111081		0.0113512	0.00297609	0.000136658	0.0211286	0.00283772	9.64844e-14	ADARB1	LINC00205, POFUT2, ADARB1
19	p13.11	rs12104325	17990284:18990284	CED	0.000346126	-0.0126554	0.00353684	1.25124e-06	-0.0158918	0.00327834	0.119284		0.423628	0.00500036	0.00624925	0.020496	0.0149178	0.00643779	0.0792414		-0.00837204	0.00307806	0.00652998	-0.00954749	0.00292137	0.0010825	GDF15	ELL, LRRC25
11	q13.2	rs35313216	65724195:66724195	CED	0.000348043	-0.0132417	0.00370219	0.0292528	-0.00749185	0.00343651	0.0754358		0.555808	-0.00338939	0.00575366	0.0106696	-0.0151203	0.00592151	0.034161		-0.0103569	0.00311336	0.000879096	-0.00941379	0.00297225	0.00153897	MRPL11	LRFN4, CTSF, SF3B2, FIBP, RAD9A, PELI3, BANF1, CCS, DPP3, CTSW
10	q23.33	rs9888067	96148224:97148224	CED	0.000378451	0.0153032	0.00430502	0.0328811	0.0085137	0.0039904	0.0161554		0.666411	-0.00764166	0.0177266	0.020905	0.0430716	0.0186475	0.00930332		0.0140253	0.00418342	0.000800587	0.0100269	0.00390206	0.0101804	RP11-400G3.3, CYP2C9	TBC1D12, HELLS, PDLIM1
11	p11.2	rs7121515	43383280:44383280	CED	0.000438627	-0.0128817	0.00366401	9.5849e-05	-0.0133063	0.00341105	0.0290322		0.0304531	0.012244	0.00565742	0.0151566	0.0140032	0.00576566	0.113427		-0.00545706	0.00307537	0.0759904	-0.00622594	0.00293576	0.0339447	RP11-613D13.5
4	p15.2	rs34811474	24908838:25908838	CED	0.000465189	-0.0143389	0.00409669	2.19521e-12	-0.0267678	0.00381202	0.0058794	SSE_Female	0.168198	-0.00881757	0.0063986	4.34828e-05	-0.0265895	0.00650335	0.0030079		-0.0127336	0.00345014	0.000223582	-0.0267222	0.00328869	4.45533e-16	ANAPC4	ANAPC4
4	q26	rs1397610	119627761:120627761	CED	0.00048853	-0.0137417	0.0039408	0.0269103	-0.0081064	0.00366336	0.00682426		0.00307636	-0.043493	0.0146925	0.792806	-0.00393871	0.0149949	0.00287503		-0.0157384	0.00380626	3.55159e-05	-0.00787166	0.0035587	0.0269702	RP11-455G16.1	AC110373.1, AC093752.1, C4orf3, AC092656.1, USP53
16	p12.3	rs72771049	19433511:20433511	CED	0.000510768	-0.0172376	0.00496031	1.69507e-06	-0.0219918	0.00459416	0.0473206		0.0490521	-0.0114009	0.00579252	0.00170013	-0.0186267	0.00593516	0.00419103		-0.0147683	0.00376766	8.86407e-05	-0.020731	0.00363295	1.15405e-08	AC134300.1, GPR139	IQCK, KNOP1, AC027130.1, GPRC5B, VPS35L
2	p22.2	rs9295	36277825:37277825	CED	0.000522035	0.0130086	0.00374969	1.7391e-07	0.0181339	0.00347031	0.0338434		0.272472	-0.00689694	0.00628477	2.342e-05	-0.027085	0.0064031	0.0122213		0.007783	0.00322011	0.0156491	0.00786721	0.00305102	0.00992169	AC007401.2	FEZ2, CRIM1
16	p13.3	rs116353685	1678425:2678425	CED	0.000628947	-0.019517	0.0057086	0.186215	-0.00704392	0.00532878	0.0105034		0.208922	-0.00819465	0.00652149	0.0252171	-0.0149437	0.00667683	0.0716943		-0.0146051	0.00429541	0.00067347	-0.0101178	0.00416493	0.0151285	PKD1	MIDN, RAB26, MLST8, TRAF7, PKD1, PKDCC
4	q31.21	rs1812175	145074844:146074844	AED	0.000660704	-0.0126116	0.00370335	0.338885	-0.00329517	0.00344549	0.0249512		0.259897	0.00607507	0.00539214	0.016429	0.0132841	0.00553657	0.0273129		-0.00662225	0.00305271	0.0300594	0.00133315	0.00292529	0.648584	HHIP	HHIP
10	q25.3	rs10886022	118278079:119278079	CED	0.00067828	0.0137005	0.0040316	4.87199e-08	0.0204244	0.00374339	0.124883		0.785729	-0.00159183	0.00585527	0.00329088	0.0175924	0.00598513	0.00291613		0.00878225	0.00332059	0.00817428	0.0196281	0.00317375	6.22965e-10	KIAA1598	VAX1, SHTN1
3	p22.1	rs4973930	40806063:41806063	CED	0.000694855	0.0118556	0.0034955	2.68078e-06	0.015227	0.00324392	0.0374258		0.0203363	0.0145206	0.00625837	0.869464	0.0010519	0.0064007	0.0201933		0.0124893	0.00305175	4.26755e-05	0.0123301	0.00289353	2.03257e-05	ULK4	ULK4, CTNNB1
4	q31.1	rs1912528	140445966:141445966	CED	0.000695783	-0.0122777	0.00362035	1.27955e-10	-0.0216091	0.0033607	0.0019755	CED	0.00270922	-0.0172246	0.00574313	2.87062e-05	-0.0246653	0.0058952	0.0392067		-0.0136845	0.00306262	7.88738e-06	-0.0223587	0.00291961	1.88671e-14	MAML3	MAML3
6	p22.1	rs41269289	27727145:28727145	CED	0.000698108	0.0128126	0.0037791	9.13557e-05	0.0137619	0.00351737	0.121214		0.046402	0.0380384	0.0190976	0.0760652	-0.035529	0.0200273	0.00392533		0.0137632	0.00370721	0.000205192	0.012287	0.00346435	0.00039009	NKAPL	ZNF204P, ZSCAN12P1, FAM222B, ZKSCAN4, PGBD1, ZNF311, HLA-H, ZNF192P1, ZSCAN9, ZNF771, HIST1H2BK, ZSCAN31, ZKSCAN3, ZSCAN16, ZSCAN23
16	p13.3	rs12709120	4446584:5446584	CED	0.000760671	-0.0122816	0.00364786	2.01209e-07	-0.0176238	0.00339023	0.0123936		0.202718	0.00773313	0.00607057	0.00235577	0.0189874	0.00624284	0.0538601		-0.00697178	0.00312676	0.0257664	-0.0092857	0.00297926	0.0018284	PPL	GLYR1, MGRN1, ZNF500, UBN1, PPL, AC020663.2, SEPT12, ROGDI
1	p21.3	rs61787785	97832523:98832523	CED	0.000775084	0.0165653	0.00492778	1.06379e-08	0.0262793	0.0045939	0.032642	CED	0.481835	0.00458031	0.00651203	1.23064e-05	0.0292165	0.0066817	0.00187691		0.0122013	0.00392951	0.00190249	0.0272221	0.00378551	6.42555e-13	DPYD	DPYD
6	p12.3	rs1414506	50987416:51987416	CED	0.000775369	0.0116875	0.00347686	1.35669e-07	0.0170156	0.00322802	0.0168938		0.000288948	-0.0230323	0.00635304	0.32508	-0.00641993	0.00652376	0.00780288		0.00368531	0.00304998	0.22693	0.0124063	0.00289321	1.80241e-05	PKHD1
15	q21.1	rs11070586	47251837:48251837	AED	0.000775715	0.0118962	0.00353907	2.15162e-08	0.0184232	0.00329011	0.00815548		0.112342	0.0124363	0.00783243	0.00205776	0.0251369	0.00815614	0.0864627		0.0119878	0.00322512	0.000201601	0.0193628	0.00305121	2.21076e-10	SEMA6D
19	p13.11	rs78830644	18388150:19388150	CED	0.000809566	0.0217605	0.0064965	9.29248e-10	0.0369059	0.00602898	0.0752495		0.106267	-0.0346837	0.0214727	0.927763	-0.00204559	0.0225633	0.0871885		0.0170272	0.00621814	0.0061757	0.0343102	0.00582463	3.84952e-09	CRTC1
2	p25.3	rs2685229	0:935315	CED	0.000810109	0.0127138	0.00379585	1.30888e-06	0.0170505	0.00352389	0.00571251		0.00724699	-0.0146511	0.00545573	0.002668	-0.0168045	0.00559444	0.09395		0.00378793	0.00311588	0.224105	0.00743368	0.00298168	0.0126627	AC105393.2, AC093326.1	SPG11, ALKAL2
12	q23.3	rs11609659	107796260:108796260	CED	0.000852098	-0.0135226	0.00405432	4.00789e-10	-0.0235207	0.00376088	0.0402974		0.000177966	-0.0203037	0.00541601	0.426618	-0.00442262	0.00556305	0.00598079		-0.0159579	0.00324567	8.80272e-07	-0.0175301	0.00311569	1.84017e-08	RP11-554D14.3, RP11-554D14.2	RFPL1S
15	q21.2	rs35697691	51853498:52853498	CED	0.000872399	0.0221731	0.006661	1.23362e-07	0.0328098	0.00620382	0.226599		0.480293	-0.0205035	0.0290483	0.00479994	0.0789435	0.0279911	0.00660836		0.0200412	0.00649249	0.00202308	0.0349699	0.00605684	7.75872e-09	CTD-2184D3.5	TMOD2, TMOD3, MYO5A
12	q13.2	rs2292238	55993822:56993822	CED	0.000916301	-0.0117017	0.00352981	1.54476e-07	-0.0172027	0.00327836	0.0436094		0.0306626	0.0122924	0.0056869	0.454139	0.00436528	0.00583173	0.00640873		-0.00502864	0.00299907	0.0935945	-0.0120235	0.00285775	2.58421e-05	ERBB3	RAB5B, SUOX, MYL6B, SPRYD4, AC034102.3, ERBB3, MYL6, RPS26
1	q32.2	rs7534723	209833428:210833428	CED	0.00101846	0.0146103	0.004447	1.14799e-07	0.0219378	0.00413781	0.0292927		0.000684293	0.0219852	0.00647363	0.666562	0.00286211	0.00664256	0.0196173		0.0169747	0.00366547	3.63953e-06	0.0166051	0.00351213	2.26832e-06	SYT14	IRF6, UTP25, TRAF3IP3
5	q14.1	rs66637616	76946603:77946603	CED	0.00102934	0.0119248	0.00363291	4.363e-06	0.0154824	0.00337055	0.0136971		0.0291583	0.0117663	0.00539386	0.609248	0.00282836	0.00553331	0.113047		0.0118753	0.00301319	8.11025e-05	0.0120578	0.00287855	2.80376e-05	AP3B1	AP3B1
3	p25.1	rs2455821	15181940:16181940	CED	0.00105419	0.0127637	0.00389646	1.11985e-07	0.0192422	0.00362628	0.0232805		0.747449	-0.00305568	0.00948948	0.00329686	0.0286745	0.00975726	0.00495293		0.0104814	0.00360444	0.00363857	0.0203869	0.00339912	2.00132e-09	BTD	BTD, EAF1, ANKRD28, COLQ, HACL1
19	q13.32	rs7412	44912079:45912079	CED	0.00107821	0.0208318	0.00637186	3.02638e-08	0.0327756	0.00591604	0.0427987		0.00246443	0.029626	0.0097843	0.277577	0.0108984	0.0100372	0.0424758		0.0234508	0.00533943	1.12317e-05	0.0271349	0.00509662	1.0145e-07	APOE	LDLR, ABCG1, APOB, APOC1, NECTIN2, APOE
6	p12.3	rs75397901	49985961:50985961	CED	0.00110628	0.0446107	0.0136756	1.271e-09	0.0772934	0.0127309	0.0802531	AED	0.000473933	0.0546391	0.0156316	0.00253758	0.0490586	0.0162499	0.0488197		0.0489586	0.0102926	1.9681e-06	0.0665546	0.0100216	3.11289e-11	RP11-524K22.1
6	p21.32	rs9275588	32180423:33180423	AED	0.00122137	-0.0134688	0.00416487	0.00011057	-0.0148938	0.00385229	0.0417029		0.000100792	0.021822	0.00561098	0.132419	0.00861746	0.00572718	0.00769474		-0.000932065	0.00334426	0.780471	-0.00757002	0.00319647	0.0178728	MTCO3P1, XXbac-BPG254F23.7	HLA-DRB5, FAM8A1, PSMB9, HLA-DQB2, HLA-DQA2, CYP21A1P, HLA-DQB1-AS1, SLC44A4, HLA-DOB, TNXB, NOTCH4, HLA-DQA1, TAP2, HLA-DQB1, HLA-DRA, HLA-DRB6, DDAH2, HLA-DRB1
6	p22.2	rs707889	25595931:26595931	AED	0.0012457	-0.012923	0.00400309	9.0881e-07	-0.0182441	0.00371525	0.0537883		0.70245	-0.00207964	0.00544381	0.0917531	0.00944828	0.0056031	0.052095		-0.00911742	0.00322501	0.00469721	-0.00978705	0.0030964	0.00157348	HFE	HIST1H3B, U91328.1, HIST1H2BF, TRIM38, BTN3A2, BTN2A2, HIST1H1T, HIST1H4A, BTN2A1, HIST1H2BD, HIST1H2AE, SLC17A3, HIST1H4C, U91328.3, HIST1H4B, HIST1H1C
17	q21.31	rs138418863	44162221:45162221	CED	0.00126225	-0.0140712	0.00436385	8.64413e-06	-0.0179635	0.00403792	0.0635965		0.0138813	0.0461116	0.0187411	0.321054	0.0190548	0.0192026	0.0756828		-0.010976	0.00425015	0.00980897	-0.016396	0.0039515	3.33499e-05	ARL17A, NSF
8	q12.1	rs66954327	59325133:60325133	CED	0.00133066	0.0114183	0.00355783	0.21726	0.00407308	0.00330111	0.0325418		0.639529	-0.00261876	0.00559132	0.0439278	0.0115474	0.0057312	0.0337753		0.00737278	0.00300167	0.0140406	0.00593505	0.00286053	0.0380042	TOX	TOX
6	p21.33	rs3132579	30440989:31440989	CED	0.00141661	0.0121129	0.0037956	0.000157794	0.0133178	0.00352458	0.0634542		0.00504408	0.0150471	0.00536555	0.420868	0.00441848	0.00548931	0.00586637		0.0130915	0.00309866	2.39058e-05	0.0107199	0.00296585	0.000300981	HCG21, MUC21	DDR1, LINC00243, TRBV5-1, HLA-DQA1, TRBV19, HLA-H, TRAV17, HLA-G, RNF5, CCHCR1, DDX39B, HLA-E, HLA-S, TUBB, TRBV7-3, BTN3A2, HCG27, TRIM10, ZNRD1, XRCC6, POU5F1, CD248, RNF5P1, HLA-C, HCP5, C4A, IER3, SLC44A4, TRAV12-2, FBRSL1, MICB, TRIM26, HLA-DQB1, HLA-DRB1, PSMB9, SFTA2, PRRC2A, VARS2, HLA-B, HLA-DPB1, FLOT1, B2M
6	q16.1	rs10499014	97447755:98447755	CED	0.00144719	-0.0121961	0.00382908	4.2522e-07	-0.017946	0.0035484	0.0496953		0.00415768	-0.0309995	0.0108158	0.0683084	-0.0203306	0.0111522	0.090736		-0.0142903	0.00360955	7.52543e-05	-0.0181652	0.00338136	7.78004e-08	RP3-418C23.2, RP1-104O17.1
1	q25.2	rs11807570	177492892:178492892	CED	0.00153799	0.0118186	0.00373125	9.59515e-06	0.0153497	0.0034679	0.0685843		0.120457	0.00901108	0.00580275	2.83802e-05	0.0249502	0.00595961	0.0276683		0.0109973	0.00313842	0.000458155	0.0177782	0.00299737	3.00595e-09	RP11-568K15.1
5	q31.2	rs13174863	138580745:139580745	CED	0.00157986	0.0155017	0.00490614	1.64755e-11	0.0307025	0.00455887	0.00489508		0.653575	-0.00254925	0.00568006	0.000346652	0.0206238	0.00576408	0.00173346		0.00778885	0.00371287	0.0359232	0.026824	0.00357568	6.29484e-14	CTB-35F21.1	CXXC5, CTNNA1
11	q25	rs12806052	134018868:135018868	CED	0.00170544	-0.0146932	0.0046834	1.79382e-08	-0.024348	0.00432389	0.000422015		0.00234853	-0.0184614	0.00606797	0.203394	-0.00787321	0.00618982	0.0341244		-0.0160999	0.00370753	1.40868e-05	-0.0189452	0.00354468	9.05772e-08	AP004550.1, RP11-469N6.3
2	q31.3	rs62178054	181074287:182074287	CED	0.00180935	-0.0112415	0.00360315	1.4219e-08	-0.0189825	0.00334731	0.0744652	CED	0.399166	0.00495437	0.00587621	0.000620565	0.0206061	0.00602038	0.0203484		-0.00681602	0.00307168	0.0264875	-0.00963424	0.00292553	0.000990668	AC009478.1, FTH1P20
17	q11.2	rs79461387	28668077:29668077	AED	0.00181717	-0.0108171	0.00346854	0.000479097	-0.0112275	0.00321497	0.00420785		0.417627	0.00453299	0.00559245	0.00331038	0.0168197	0.00572582	0.0178017		-0.00655274	0.00294763	0.0262123	-0.00450464	0.0028033	0.108075	CTD-2349P21.11
15	q25.2	rs58824810	84170975:85170975	CED	0.00186049	0.0178495	0.00573627	1.19173e-05	0.0233109	0.00532309	0.0585797		0.0258928	0.0528393	0.0237169	0.241245	0.0283505	0.024192	0.0346099		0.0197832	0.00557551	0.00038782	0.0235436	0.00519873	5.93397e-06	ADAMTSL3	WDR73, UBE2Q2P1
1	p33	rs1167272	49385987:50385987	CED	0.0020425	-0.011197	0.00363064	7.01296e-09	-0.0194826	0.00336436	0.0423246	AED	0.72231	-0.00205222	0.00577476	0.000302975	0.021392	0.00592076	0.00175016		-0.00860633	0.00307364	0.00510959	-0.00950604	0.0029251	0.00115481	AGBL4-IT1	AGBL4
11	q24.1	rs11218751	122052486:123052486	CED	0.00215624	0.0110281	0.0035947	1.46901e-06	0.0161347	0.00335054	0.00785273		0.701553	0.00550517	0.0143652	0.00168077	0.0469139	0.0149325	0.0140613		0.0107026	0.00348718	0.00214674	0.01761	0.00326925	7.1819e-08	UBASH3B	MIR100HG, UBASH3B
14	q32.12	rs117068593	92618229:93618229	CED	0.00222554	-0.0139449	0.00455954	0.00944474	-0.010979	0.00422994	0.0737715		0.00694441	-0.0351465	0.0130188	0.440179	-0.0102109	0.0132283	0.0315574		-0.0162613	0.00430325	0.000157557	-0.0109077	0.00402897	0.00678273	RIN3	RIN3
18	q21.32	rs79131845	57510896:58510896	CED	0.00225502	-0.0170891	0.0055948	2.77671e-08	-0.0289352	0.00520867	0.0672169		0.00547286	-0.0241686	0.00870004	0.726108	0.00312529	0.00892152	0.0020044		-0.0191603	0.00470575	4.6677e-05	-0.0207851	0.00449816	3.82265e-06	RP11-396N11.1, MC4R
5	q23.3	rs6595799	126908683:127908683	OED	0.00227325	-0.0105738	0.00346449	0.667814	0.00138233	0.00322107	0.0114899		0.00257709	0.0167225	0.00554759	0.438372	0.00442642	0.00571186	0.00616733		-0.00291506	0.00293854	0.321193	0.00211681	0.00280569	0.450566	CTC-228N24.3	LINC01184, FBN2, HIC1, SLC12A2
8	p22	rs1559900	13707321:14707321	CED	0.00228605	0.0117073	0.00383801	2.59627e-07	0.0183518	0.0035629	0.0234888		0.686235	0.00217594	0.00538635	0.00390345	0.0159878	0.00553972	0.0344557		0.00849765	0.00312569	0.00655494	0.0176601	0.00299663	3.78529e-09	SGCZ
16	p11.2	rs34898535	30525641:31525641	SSE	0.0022953	-0.0109622	0.00359518	1.78891e-20	-0.0309066	0.00333214	1.65124e-05	AED	0.908827	0.000640157	0.00558998	6.54204e-05	-0.0228144	0.00571395	0.00167215		-0.00756729	0.00302379	0.012329	-0.028853	0.00287845	1.19804e-23	STX1B, STX4	ITGAM, CCDC189, ZNF668, PRSS53, ITGAD, MAPK3, BCKDK, STX4, STX1B, KAT8, ARMC5, PHKG2, ITGAX, ZNF646, HSD3B7, VKORC1, SETD1A
20	q11.22	rs2275274	33357544:34357544	CED	0.00239705	-0.0189554	0.00624336	7.41776e-05	-0.0229875	0.00580116	0.0526905		0.0275569	-0.0456573	0.0207191	0.13922	-0.0307176	0.020773	0.153064		-0.0211782	0.00597786	0.000395952	-0.0235467	0.00558737	2.50579e-05	RP4-614O4.11	UQCC1, TRPC4AP, CPNE1, MMP24, PROCR, MMP24OS, MYH7B, MT1P3, EIF6
14	q23.1	rs1955695	60521891:61521891	OED	0.00246861	0.0111578	0.00368583	0.263131	-0.0038222	0.00341566	0.000785329		0.000732386	-0.0232165	0.0068739	0.389679	-0.00611547	0.00710929	0.000839239		0.00348162	0.00324832	0.283799	-0.00425228	0.00307876	0.167227	RP11-1042B17.3, RP11-1042B17.1	C14orf39, PCNX4
6	p21.31	rs6901580	34743998:35743998	CED	0.00253094	0.0363977	0.0120535	1.41038e-08	0.0639357	0.0112714	0.0153466		0.0343347	-0.0370294	0.017498	0.73163	0.00612208	0.0178507	0.0259289		0.0127681	0.00992633	0.198344	0.0474559	0.0095305	6.37901e-07	ZNF76	UHRF1BP1, ZNF76, DEF6, ANKS1A
1	q25.2	rs72717429	177269090:178269090	AED	0.00253111	0.0302546	0.0100193	1.39338e-07	0.0489511	0.00929512	0.00563212		0.0110817	0.0387057	0.015237	0.0397084	0.0325651	0.0158327	0.111036		0.0328057	0.00837157	8.90258e-05	0.044751	0.00801581	2.3662e-08	RP11-63B19.1, SEC16B
12	q24.21	rs12810788	115696322:116696322	AED	0.00254719	0.0107529	0.00356324	0.625221	-0.00161167	0.00329946	0.00539463		0.913846	-0.000756457	0.00699193	0.0479842	-0.0142625	0.00721217	0.0271618		0.00838002	0.00317475	0.00830067	-0.00380115	0.00300039	0.205195	RP11-110L15.1
19	p13.3	rs11666480	1356554:2356554	SSE	0.00255088	0.0105466	0.00349538	1.46547e-12	0.0229221	0.00323841	0.00560789		0.670802	0.00373767	0.00879344	0.124633	-0.0139895	0.00910982	0.0807439		0.00961755	0.00324817	0.00306731	0.0187809	0.00305134	7.50968e-10	KLF16	KLF16, REXO1, ABHD17A, SCAMP4
15	q21.2	rs979259	51459430:52459430	CED	0.00259003	-0.0106345	0.00352992	4.32828e-09	-0.0192382	0.00327658	0.0465328		0.903059	0.000663819	0.00545013	0.00396089	0.0161515	0.0056054	0.0115381		-0.00729563	0.00296278	0.0138	-0.0102255	0.00282875	0.000300523	DMXL2, SCG3	TMOD2, AC020892.1, GNB5, AC090971.4, LYSMD2, DMXL2
10	q24.31	rs61873510	102126510:103126510	CED	0.00284237	0.0104352	0.00349667	0.000269948	0.0118019	0.00323996	0.512691		0.0161309	0.0130826	0.00543736	0.665094	0.00239943	0.00554278	0.0844261		0.0112097	0.00294102	0.000138121	0.00940739	0.00279714	0.000770401	PAX2, Y_RNA	SLF2
4	q31.21	rs72718281	145508537:146508537	CED	0.00291173	-0.0153936	0.00517094	0.115704	-0.00754574	0.00479682	0.265854		0.838771	-0.00146934	0.00722153	0.0015991	-0.0234276	0.00742253	0.00559266		-0.0106741	0.00420427	0.0111208	-0.0122246	0.00402875	0.00241066	ANAPC10	OTUD4
5	q13.3	rs4704187	73980288:74980288	SSE	0.00296109	-0.010378	0.00349217	3.68954e-11	-0.0214457	0.00324128	0.000241976	SSE_Female	0.701622	-0.00267134	0.00697232	1.68151e-09	-0.0430105	0.00713597	1.7974e-05	SSE	-0.00883242	0.00312241	0.00467355	-0.0251339	0.00295112	1.64116e-17	ANKRD31	COL4A3BP, HMGCR, POC5, GCNT4, ANKRD31
11	p14.1	rs640494	29908061:30908061	CED	0.00325444	0.0105221	0.00357571	7.16104e-07	0.0163916	0.00330669	0.105983		0.000199536	0.0220525	0.00592803	0.345497	-0.00573343	0.00607759	0.000532408		0.0135981	0.00306183	8.94736e-06	0.0113381	0.00290461	9.4821e-05	MPPED2	ARL14EP, MPPED2
19	q13.32	rs429358	44911941:45911941	CED	0.00329285	-0.0129594	0.00440941	4.85666e-10	-0.0255155	0.00409955	0.012352	SSE_Female	0.136079	-0.0110545	0.00741618	0.000558324	-0.0264193	0.00765477	0.000812777		-0.0124619	0.00379009	0.00100897	-0.0257169	0.00361391	1.11024e-12	APOE	APOC1, APOE
18	q11.2	rs7230974	22291902:23291902	CED	0.00341859	0.0102259	0.00349318	2.16238e-07	0.0168382	0.00324748	0.165636		0.00150511	-0.0177954	0.00560669	0.322896	0.00572671	0.00579312	0.00164361		0.00239029	0.00296482	0.420117	0.0141814	0.00283275	5.55098e-07	ZNF521
2	p16.1	rs3791679	55596892:56596892	AED	0.00343633	0.010377	0.00354675	0.169016	0.00453379	0.00329639	0.0194196		0.674862	0.00279188	0.00665544	0.00287582	-0.0203217	0.00681735	0.00441548		0.00869933	0.00313004	0.00544752	-0.000176236	0.00296767	0.952645	EFEMP1	EFEMP1
2	q36.3	rs12615115	228517931:229517931	CED	0.00349725	0.0119848	0.00410395	4.2219e-08	0.0208956	0.003812	0.0236907	SSE_Female	0.102059	0.00875183	0.0053528	0.000407364	0.0194099	0.00548992	0.0055282		0.0107879	0.00325688	0.000925146	0.0204123	0.00313118	7.07577e-11	SPHKAP
7	q31.32	rs10237306	121455981:122455981	AED	0.00357578	0.0123365	0.00423442	3.06697e-05	0.0163919	0.0039323	0.092098		0.00015117	0.0248036	0.0065452	0.177761	-0.00902866	0.00669928	0.000151757		0.0160149	0.00355527	6.65083e-06	0.00987788	0.00339125	0.00358258	FEZF1, CADPS2	CADPS2
5	q21.3	rs286818	106933446:107933446	CED	0.0036091	-0.0134936	0.0046362	2.74678e-10	-0.0270598	0.00428652	0.00142013	AED	0.0469802	-0.0171086	0.00861221	0.000496474	-0.0310839	0.00892465	0.00990349		-0.0143058	0.00408227	0.000457662	-0.0278141	0.00386394	6.09345e-13	FBXL17
6	p21.31	rs59144247	34253276:35253276	SSE	0.00373912	0.0139604	0.00481492	1.77267e-13	0.0330037	0.00448089	0.00378827	AED	0.150262	0.00818421	0.00568884	0.00319138	0.0174039	0.00590194	0.0658778		0.0115496	0.00367523	0.00167487	0.0272996	0.00356885	2.01897e-14	SNRPC, UHRF1BP1
9	q33.1	rs2491646	120225410:121225410	CED	0.00380354	0.0101267	0.00349916	8.1478e-08	0.0174298	0.00324938	0.121028		0.626394	-0.00268369	0.00551276	0.00151104	0.0179286	0.00565077	0.00285266		0.00644772	0.00295428	0.0290725	0.0175537	0.00281687	4.61531e-10	RP11-281A20.1, TPT1P9	TLR4
8	p23.1	rs17151145	9483211:10483211	CED	0.00388835	0.0115165	0.00398893	3.5255e-08	0.0204504	0.00370926	0.00675955		0.000477033	-0.0191518	0.00548182	0.60505	-0.00289235	0.00559279	0.0156903		0.000899436	0.00322539	0.780351	0.0133194	0.0030912	1.64122e-05	MSRA	MSRA, AF131215.2
17	p13.3	rs4268798	1866585:2866585	AED	0.00419747	0.0180427	0.00630209	0.00552593	0.0162615	0.00586064	0.0523794		0.592974	0.00364782	0.00682426	0.00612351	0.0191955	0.0070025	0.0115607		0.011417	0.00462986	0.0136652	0.0174701	0.0044943	0.000101421	METTL16	MNT, METTL16, SGSM2
2	p23.3	rs188571496	24187610:25187610	CED	0.00431669	0.0104342	0.00365588	3.27801e-08	0.018761	0.00339496	0.0412901		0.00342452	-0.0734474	0.0250928	0.513245	0.016906	0.0258581	0.00607767		0.00869067	0.00361769	0.0162936	0.0187296	0.00336607	2.63328e-08	ITSN2, NCOA1
2	p23.3	rs11125502	23939917:24939917	AED	0.00454434	-0.00989001	0.0034852	2.7923e-05	-0.0135809	0.00324137	0.00357364		0.0157392	-0.0132993	0.00550689	0.640922	-0.00264067	0.00566165	0.015636		-0.010865	0.00294497	0.000224824	-0.0108802	0.00281298	0.000109796	AC009228.1	PFN4, C2orf84, ITSN2, FAM228A, SF3B6, TP53I3, ATAD2B, AC009228.1, AC008073.2, AC008073.1, UBXN2A
15	q26.3	rs56803094	98722509:99722509	AED	0.00469392	-0.0117178	0.00414442	7.73923e-07	-0.0190236	0.00384939	0.0450185		0.871868	0.00219072	0.0135827	0.065383	-0.0250476	0.013593	0.0542816		-0.0105332	0.003964	0.00787898	-0.0194708	0.00370374	1.46367e-07	IGF1R	IGF1R
15	q26.1	rs3817428	88915247:89915247	CED	0.00474147	-0.0121863	0.00431505	0.000685827	-0.0135428	0.00398876	0.355367		0.00240401	-0.0174283	0.00574167	0.562192	-0.00339916	0.00586473	0.0436956		-0.0140784	0.0034495	4.47899e-05	-0.0103346	0.00329822	0.00172793	ACAN
3	p21.31	rs35917071	49465609:50465609	CED	0.00476566	-0.0159923	0.005666	1.55523e-06	-0.0252013	0.00524573	0.0152129		0.00512786	0.0670569	0.0239568	0.17298	-0.0331688	0.0243402	0.00166948		-0.0115929	0.00551388	0.0355101	-0.0255549	0.00512799	6.24691e-07	MON1A	RBM6
6	p22.3	rs41271299	19339415:20339415	AED	0.00500135	-0.0113533	0.00404465	0.720896	-0.001339	0.00374795	0.0690703		0.751925	-0.00199239	0.00630293	0.286698	0.00688095	0.00645852	0.162739		-0.00862291	0.00340405	0.0113048	0.000731795	0.00324166	0.821398	ID4
1	p36.31	rs11122106	6181262:7181262	CED	0.00533276	0.0103615	0.00371879	1.14776e-05	0.0151249	0.00344735	0.0568445		0.243128	-0.00666587	0.00571087	0.00120296	0.0189081	0.00583871	0.00084354		0.00529128	0.00311632	0.0895214	0.0161028	0.00296854	5.81166e-08	PHF13	THAP3
11	p15.4	rs4929923	8139200:9139200	CED	0.00575367	0.00998104	0.00361431	1.41175e-10	0.0215931	0.00336604	0.00060801	AED	0.0490213	-0.013055	0.00663202	0.00051909	-0.0235998	0.00679916	0.00788627		0.00470599	0.00317362	0.138115	0.0126971	0.00301661	2.56444e-05	TRIM66	TRIM66, RPL27A, STK33, AKIP1
20	q11.22	rs6088638	32970514:33970514	AED	0.00579849	0.0218274	0.00791133	0.0291246	0.0160166	0.00734099	0.00209399		0.416266	-0.00575818	0.00708328	0.0421001	0.0148968	0.00732898	0.00846908		0.00651588	0.00527719	0.216933	0.0154558	0.00518661	0.00288307	ACSS2	TRPC4AP, MAP1LC3A, PIGU, PROCR, GGT7, TP53INP2, EDEM2, MYH7B, EIF6
2	p21	rs10865202	44264956:45264956	CED	0.00618657	0.0110539	0.00403758	1.16234e-06	0.0182556	0.00375468	0.0169222		0.947395	-0.000372324	0.0056431	0.000329528	-0.0208443	0.00580426	0.00572153		0.00718507	0.00328364	0.0286593	0.00672077	0.00315257	0.0330201	CAMKMT	PREPL, CAMKMT
18	q21.32	rs76671217	57550672:58550672	AED	0.00622666	0.021061	0.00769875	2.40653e-06	0.0336779	0.00714115	0.075484		0.0310117	0.0259945	0.0120512	0.0477927	0.0247156	0.0124872	0.0505634		0.0224909	0.00648786	0.000527069	0.0314692	0.00619906	3.84556e-07	MC4R, RP11-325K19.3
1	p31.1	rs17378915	77304242:78304242	CED	0.00666218	0.0127189	0.00468759	1.95722e-06	0.0206831	0.00434707	0.034934		9.78016e-06	0.0250161	0.00565634	0.117025	0.0091395	0.00583093	0.0253291		0.0177258	0.00360926	9.05167e-07	0.0165592	0.00348514	2.02029e-06	AK5	PIGK
20	p11.21	rs6083730	24527526:25527526	CED	0.00735813	0.00970274	0.00362013	1.19996e-06	0.0162933	0.00335543	0.027026		0.00519438	-0.0215766	0.00771995	0.296489	0.00835527	0.00800309	0.00355343		0.00406437	0.00327765	0.214966	0.0151065	0.00309446	1.05119e-06	ACSS1	CST7, ENTPD6, ZNF337, PYGB, ACSS1
2	q31.2	rs35445420	178912966:179912966	CED	0.00768688	-0.0490167	0.0183889	0.27407	0.0189118	0.0172909	0.00712046		0.330793	-0.0068789	0.00707318	0.0635146	-0.0133646	0.00720221	0.158908		-0.0123097	0.00660166	0.0622315	-0.00859262	0.00664851	0.196214	TTN	SESTD1
6	p22.2	rs140058581	25669270:26669270	AED	0.00778799	-0.0249789	0.00938649	8.29866e-05	-0.0346307	0.00879914	0.136373		0.605571	0.0347346	0.0672615	0.0679788	-0.140515	0.0769862	0.0432399		-0.0238382	0.0092964	0.0103402	-0.0359961	0.00874222	3.83012e-05	HIST1H2BD	BTN3A2, HIST1H2BD, BTN3A1, HIST1H4H
7	q21.2	rs10264916	91786376:92786376	AED	0.0087267	-0.019663	0.00749747	0.637725	-0.00327667	0.00695857	0.0108676		0.0240907	-0.0120994	0.00536373	0.0830189	-0.00950028	0.00548049	0.0255147		-0.01466	0.00436234	0.000777793	-0.0071177	0.00430549	0.0982962	CDK6	CDK6, GATAD1
6	p12.3	rs544586525	50503250:51503250	AED	0.00894079	0.0501385	0.0191782	0.000528649	0.0624251	0.0180114	0.120536		0.000108042	0.106297	0.027451	0.20033	0.0362939	0.0283406	0.0380131		0.0685583	0.0157215	1.29583e-05	0.0549072	0.0152012	0.000303823	FTH1P5, RP3-437C15.2
18	q21.1	rs8087074	45423482:46423482	CED	0.00932962	0.0102991	0.00396156	1.55219e-08	0.0208023	0.00367796	0.0148584		0.000528415	-0.0469143	0.0135345	0.422865	-0.0111681	0.0139346	0.030277		0.00578422	0.00380204	0.128173	0.0187201	0.00355617	1.40868e-07	ZBTB7C
12	q24.31	rs2280574	121992978:122992978	CED	0.00951955	-0.0113877	0.00439199	3.05149e-09	-0.0241058	0.00406569	0.0045002	AED	0.178272	0.00725368	0.00538857	0.000584988	0.0189054	0.00549776	0.00834612		-0.00394694	0.00340442	0.246311	-0.00889962	0.00326893	0.0064792	BCL7A	PRSS3, MLXIP, AC156455.1, LRRC43, BCL7A
8	p23.1	rs6601527	10165444:11165444	CED	0.00956044	-0.0091425	0.00352806	8.87081e-12	-0.0223722	0.00327839	0.00012836		0.0912387	0.00922855	0.00546408	0.000273847	0.0202189	0.00555591	0.00390693		-0.00373706	0.00296391	0.207361	-0.0113725	0.00282349	5.62943e-05	PINX1	RP1L1, AF131215.5, SOX7, AF131215.6, FAM86B3P, FDFT1, NEIL2, AF131216.3, FAM66A, XKR6, CLDN23, AF131215.2, FAM167A, BLK, MSRA, AC087203.2, SLC35G5
9	q31.1	rs3923501	102565884:103565884	AED	0.00962281	0.00897834	0.00346771	7.5141e-08	0.0173048	0.00321733	0.00348589		0.302916	0.00598119	0.00580577	0.0014181	0.0189619	0.00594203	0.0214351		0.00819025	0.00297709	0.00593974	0.0176805	0.00282923	4.12485e-10	TEX10	STX17, TEX10, INVS
13	q12.11	rs9579775	20116557:21116557	CED	0.00984737	0.00986611	0.00382233	4.54628e-07	0.0179073	0.00354971	0.059043		0.674866	0.00390517	0.00930949	0.000376313	0.0337513	0.00949015	0.0123812		0.00900618	0.00353589	0.010863	0.0198519	0.00332474	2.35857e-09	ZMYM2
3	p12.2	rs2603205	82203900:83203900	CED	0.0103269	-0.010996	0.00428742	4.97718e-07	-0.0200315	0.0039845	0.0098978	AED	0.801743	-0.00141129	0.00562054	0.000147952	-0.0217193	0.00572337	0.00567654		-0.00747034	0.00340886	0.0284193	-0.0205825	0.00327009	3.09048e-10	RP11-260O18.1, CYP51A1P1
17	q24.3	rs2108535	68661145:69661145	CED	0.0104895	-0.00887058	0.00346603	4.02654e-07	-0.0163152	0.00321934	0.0116938		0.028652	0.0130755	0.00597509	0.966848	0.00025479	0.00613029	0.0295111		-0.00334515	0.00299812	0.264529	-0.0127333	0.00285022	7.91479e-06	CASC17
14	q24.3	rs10138360	74793386:75793386	CED	0.0105395	-0.01261	0.00493034	0.000100834	-0.0177879	0.00457429	0.0325192		0.000210224	-0.0287552	0.00775738	0.171442	-0.0108675	0.00794636	0.00583839		-0.0172553	0.00416104	3.37034e-05	-0.0160655	0.00396437	5.06822e-05	YLPM1	NEK9, PROX2, EIF2B2, LTBP2, MLH3, RPS6KL1, AREL1, YLPM1, DLST
9	q21.13	rs35344761	78010823:79010823	CED	0.0105593	-0.0135689	0.0053066	0.234287	-0.00588109	0.00494463	0.195839		0.918375	0.000596351	0.00581906	0.0362562	-0.0124324	0.00593684	0.0585274		-0.00713736	0.00392101	0.0687156	-0.0085643	0.00379943	0.0241898	PCSK5
5	q23.2	rs1582931	122157199:123157199	CED	0.0106664	-0.00968384	0.00379242	0.000154096	-0.0133949	0.00353946	0.00941804		0.00333314	-0.0160544	0.00546917	0.574184	-0.00315245	0.00561029	0.0130995		-0.0117524	0.00311648	0.000162566	-0.0104789	0.00299351	0.000464341	CTD-2347I17.1, CEP120	CEP120
17	p13.1	rs2242449	6595507:7595507	SSE	0.0107154	0.00889224	0.00348459	8.26027e-09	0.0185816	0.00322412	0.00296059	AED	0.353119	-0.00501567	0.00540151	1.73301e-06	-0.0264207	0.00552389	0.000209765		0.00480511	0.00292815	0.100797	0.00714635	0.00278452	0.0102743	DLG4	CLDN7, DLG4, ELP5, ACADVL, ASGR2, CTDNEP1, GRAMD1C, DVL2
7	p22.2	rs1011189	2634524:3634524	AED	0.011143	0.0128026	0.00504394	2.81639e-07	0.0240959	0.004692	0.0348016		0.17768	0.0105728	0.00784351	0.000964866	0.0265735	0.00805059	0.0272547		0.0121503	0.00424244	0.00418356	0.0247241	0.00405377	1.06705e-09	AC024028.1, AC091801.1	CARD11, SDK1
6	p21.31	rs9296115	33934715:34934715	AED	0.0115198	0.0109828	0.00434697	4.47957e-09	0.0236341	0.00402919	0.0328032		0.0317794	0.0150945	0.00702964	0.411159	0.00594743	0.00723651	0.137363		0.0121202	0.00369719	0.00104467	0.0194486	0.0035203	3.30069e-08	PACSIN1	SNRPC, PACSIN1, UHRF1BP1, SMIM29
6	p21.31	rs187618215	35300666:36300666	CED	0.0117678	0.0284682	0.0113011	2.55219e-07	0.0543077	0.010537	0.0617638		0.883186	0.0013988	0.00952	0.0136147	-0.0238473	0.00966505	0.0299832		0.0126347	0.00728091	0.0826839	0.0118632	0.00712257	0.0957975	LHFPL5	UHRF1BP1, DEF6, SLC26A8
5	q23.2	rs245158	126747600:127747600	CED	0.0118112	-0.0224276	0.00890773	0.364895	-0.00757974	0.00836543	0.19488		0.0131935	-0.0346052	0.0139614	0.918872	0.00144489	0.0141858	0.0313393		-0.0259507	0.00750945	0.000548798	-0.00525117	0.00720582	0.46616	CTC-228N24.1	FBN2
1	p31.3	rs11208779	65917145:66917145	CED	0.0119074	-0.00960541	0.00381939	2.56869e-06	-0.0167283	0.00355714	0.0267		0.374945	-0.00585994	0.00660452	0.00414396	-0.0192099	0.00670001	0.0239566		-0.00866673	0.00330633	0.00876066	-0.017274	0.0031418	3.83876e-08	PDE4B	LEPROT
4	q24	rs4371620	102208235:103208235	CED	0.0119377	-0.0108911	0.00433218	3.34629e-09	-0.023876	0.00403725	0.0283257	SSE_Female	0.569748	0.00515589	0.00907044	0.00249908	0.0284021	0.00939334	0.0375178		-0.00791045	0.00390919	0.0430161	-0.0157246	0.00370917	2.24132e-05	BANK1
15	q24.3	rs11855853	77512618:78512618	CED	0.0120591	-0.00985632	0.00392614	4.99309e-07	-0.0182289	0.00362639	0.078189		0.00579135	-0.0306238	0.0110974	0.776171	-0.00318988	0.0112195	0.0410657		-0.0121666	0.00370133	0.00101232	-0.0168064	0.00345062	1.11298e-06	LINGO1	TSPAN3
20	p11.21	rs11474838	24949887:25949887	SSE	0.0121178	-0.00922452	0.00367698	4.95484e-09	-0.0199852	0.00341688	0.000986396		0.00161113	0.0180479	0.00572196	0.0310462	0.0126538	0.00586762	0.0206012		-0.00125392	0.00309335	0.685213	-0.0117199	0.00295272	7.21156e-05	NINL	NINL, FAM182A, ENTPD6, NANP, MALT1, ABHD12, GINS1, FAM182B, PYGB
6	q25.2	rs9688977	153836892:154836892	CED	0.0122197	0.0123207	0.00491693	1.10396e-08	0.0261404	0.00457465	0.0161413		0.0116743	-0.0387607	0.0153692	0.0771503	0.0282387	0.0159766	0.00125467		0.00757796	0.00468311	0.105631	0.0262994	0.00439791	2.23178e-09	OPRM1
6	p21.31	rs147099358	33983765:34983765	CED	0.0131114	0.0157837	0.00636245	1.89312e-09	0.035538	0.00591608	0.00348831		0.115924	-0.0156195	0.00993512	0.0359963	-0.0215421	0.0102726	0.0569655		0.0066505	0.00535794	0.214516	0.0213214	0.00512667	3.19756e-05	PACSIN1	UHRF1BP1, DEF6
16	p13.3	rs7200589	0:849331	CED	0.0132595	-0.00966905	0.00390393	9.51412e-12	-0.0246663	0.0036199	0.00484828		0.0124847	-0.0152015	0.00608477	0.124184	-0.00958467	0.00623402	0.0298208		-0.0112823	0.00328579	0.00059547	-0.0208634	0.00313042	2.65153e-11	AXIN1	PDIA2, TMEM8A, DDX11L10, HBZ, METTL26, AXIN1, HBQ1, NME4, HBM
11	q13.1	rs34292685	63549021:64549021	SSE	0.0134955	-0.0115824	0.00468839	3.13364e-10	-0.0274158	0.00435701	0.0101077	CED	0.000252593	-0.0327867	0.00895807	0.277163	-0.00998832	0.00919119	0.00995723		-0.0161417	0.00415387	0.000101931	-0.0242181	0.00393705	7.68305e-10	GPR137	CCDC88B, NUDT22, TRMT112, PPP1R14B, KCNK4, PLCB3, AP003774.1, CATSPERZ, RPS6KA4, TRPT1, STIP1, PRDX5, FERMT3, FKBP2, MACROD1
5	q34	rs4921301	159484492:160484492	CED	0.0137434	-0.0106144	0.00430791	7.684e-07	-0.0197713	0.00399953	0.0110304		0.00767192	-0.0169684	0.00636394	0.00166927	-0.0206042	0.00655405	0.030704		-0.0126111	0.00356742	0.000407675	-0.0199973	0.00341405	4.70307e-09	MIR146A, ATP10B
1	p31.1	rs2821266	72035285:73035285	AED	0.0141726	-0.00961656	0.00392051	1.7349e-06	-0.0174046	0.00363942	0.00814008		0.218785	0.00753096	0.00612378	0.0004551	0.0220386	0.00628567	0.00765798		-0.00463152	0.00330182	0.1607	-0.00750147	0.00314957	0.0172311	NEGR1	RPL31P12, NEGR1
6	p22.2	rs13217807	24907330:25907330	CED	0.0152338	-0.0107902	0.00444626	1.18359e-06	-0.0200225	0.00412112	0.0116929		0.647122	-0.00865143	0.0188992	0.0158474	-0.0460886	0.019104	0.0817903		-0.010678	0.0043281	0.0136196	-0.0211816	0.00402845	1.45641e-07	LRRC16A	BTN3A2, HIST1H2BD, CARMIL1
4	p15.31	rs9684942	19733035:20733035	CED	0.0152948	0.0118683	0.00489343	3.07401e-08	0.0251993	0.00455075	0.00108633	CED	0.000228702	0.0200764	0.00544753	0.0871275	0.00959775	0.00561013	0.0187442		0.0155338	0.00364036	1.98029e-05	0.0190077	0.00353421	7.52349e-08	RP11-339D20.1, SLIT2	SLIT2
16	p11.2	rs7193065	29533527:30533527	AED	0.0154135	0.00878938	0.00362817	1.85243e-07	0.0176012	0.00337591	0.0698834		0.295398	-0.00593132	0.00566847	0.00598086	-0.0159162	0.00578987	0.0333675		0.00451127	0.00305582	0.139866	0.00909729	0.00291637	0.00181227	DOC2A	INO80E, ASPHD1, MAPK3, FAM57B, DOC2A, YPEL3
4	q12	rs13128180	55786188:56786188	CED	0.0154495	0.00841925	0.0034766	2.24814e-06	0.0152877	0.00323216	0.0916116		0.792683	0.00147526	0.00561298	0.000442456	0.0203358	0.00578764	0.00380054		0.0064939	0.00295558	0.0280087	0.0164878	0.00282193	5.135e-09	TMEM165	SRD5A3-AS1, SRD5A3, AC024243.1, TMEM165, CLOCK, RN7SKP30, NMU
2	p21	rs935376	46539991:47539991	CED	0.0155289	-0.00845746	0.00349507	4.23431e-08	-0.0178523	0.00325711	0.0492425		0.924271	-0.000876563	0.0092215	0.000941009	-0.0314132	0.00949662	0.0105304		-0.00750524	0.0032682	0.0216506	-0.0192796	0.00308094	3.90682e-10	RP11-333I13.1, LINC01118	CRIPT
8	p23.1	rs12677507	8981687:9981687	CED	0.0156379	-0.00870685	0.00360192	1.71876e-10	-0.0213884	0.00334983	0.00385884		0.000173463	0.021218	0.00565018	0.393198	0.00493117	0.00577527	0.00398527		-5.97673e-05	0.00303725	0.9843	-0.0147627	0.00289767	3.49332e-07	TNKS	TDH, TNKS, FAM86B3P, FAM66D, FDFT1, NEIL2, FAM66A, CLDN23, MFHAS1, FAM167A, BLK, MSRA
17	q25.3	rs7503604	78595629:79595629	CED	0.015784	0.00840081	0.00348018	4.3317e-05	0.0132384	0.00323746	0.15019		0.0961345	-0.014328	0.00861091	0.012451	-0.0216632	0.00866805	0.0593988		0.00520947	0.00322662	0.106413	0.00896574	0.00303283	0.00311423	AATK	EML4, BAIAP2, AATK
10	q25.2	rs36090025	114274433:115274433	CED	0.0159251	-0.00839596	0.00348286	6.49857e-07	-0.0160998	0.00323552	0.0732273		0.0104546	-0.0293753	0.0114722	0.199312	-0.0151818	0.0118281	0.0836558		-0.0101664	0.00333266	0.00228435	-0.0160359	0.00312086	2.77255e-07	TCF7L2	TCF7L2
2	p16.1	rs6757907	54782926:55782926	SSE	0.0162969	-0.00903815	0.00376241	1.64098e-11	-0.0235298	0.00349353	0.000154829		0.000186478	-0.0205352	0.00549497	0.252401	0.00641184	0.00560205	7.77893e-05		-0.0127078	0.00310443	4.25049e-05	-0.015146	0.00296435	3.23205e-07	RTN4	CLHC1, RTN4
13	q31.1	rs1415401	85848555:86848555	CED	0.0168851	-0.00962645	0.00402911	5.91036e-08	-0.020311	0.00374624	0.0155031		0.00436361	0.0170724	0.00598861	0.000157331	0.0231272	0.00611902	0.0278585		-0.00130696	0.00334294	0.695825	-0.00846826	0.00319501	0.00803809	RNU6-72P, SLITRK6	SLITRK6
9	q33.2	rs71497048	124108352:125108352	SSE	0.0170756	-0.00846693	0.00354993	2.44217e-08	-0.0183608	0.0032919	0.00169246		0.817454	0.00149126	0.00646063	0.0635423	0.0122336	0.00659343	0.0511106		-0.0061576	0.0031112	0.0477967	-0.0122562	0.00294522	3.16322e-05	TTLL11	TTLL11
3	p21.31	rs186723383	50034722:51034722	CED	0.0188501	-0.0527235	0.0224498	6.66652e-08	-0.113005	0.0209264	0.04951		0.0560836	0.147184	0.0770412	0.269106	0.0813834	0.0736409	0.100166		-0.0370772	0.0215534	0.0853869	-0.0984807	0.0201294	9.96276e-07	CACNA2D2
9	q22.31	rs10821196	95933396:96933396	AED	0.0190377	0.00937305	0.00399735	7.3997e-07	0.0184203	0.00372072	0.00589305		0.716296	0.00253527	0.00697619	0.00164632	-0.0223893	0.00711274	0.00315486		0.00768293	0.00346832	0.0267483	0.0096524	0.00329688	0.00341442	PHF2
6	p21.31	rs9394204	33725269:34725269	SSE	0.0197124	-0.00977622	0.00419256	2.40976e-10	-0.0246984	0.00389996	0.00012196		0.0224938	-0.0247144	0.01083	0.000751453	-0.0371525	0.0110234	0.0369904		-0.0117232	0.00390981	0.00271405	-0.0260838	0.00367664	1.29853e-12	C6orf1, RPL35P2	SMIM29, HMGA1
2	q32.3	rs6746594	193401364:194401364	CED	0.0201776	-0.00868904	0.00374036	3.64186e-05	-0.0143891	0.00348472	0.00415803		0.652012	-0.0030803	0.00683033	0.00370156	-0.0202025	0.00695989	0.0200609		-0.00739512	0.00328067	0.0241866	-0.0155543	0.00311597	5.98172e-07	PCGEM1, AC092638.1
8	q21.11	rs117212676	76132003:77132003	CED	0.0205592	0.00969599	0.00418651	9.53343e-07	0.0190154	0.00387975	0.00450174		0.000648344	0.0221217	0.00648565	0.213766	0.00826938	0.00665118	0.00586494		0.0133507	0.00351736	0.000147259	0.0162872	0.00335127	1.17372e-06	HNF4G, AC016194.1
4	p16.3	rs59950280	2952345:3952345	CED	0.0211389	0.00806228	0.00349695	5.41744e-07	0.0162275	0.00323833	0.0696587		0.24435	0.00662304	0.0056889	0.0139371	0.01439	0.005852	0.0874584		0.00766759	0.00297912	0.0100595	0.0157967	0.00283343	2.47358e-08	HGFAC, DOK7	DOK7, HGFAC, RGS12
4	p15.1	rs73213484	27989339:28989339	CED	0.0214452	-0.0106228	0.00461844	1.37976e-08	-0.0243143	0.00428361	0.0193992	CED	0.0186168	-0.0321168	0.0136479	0.000648994	-0.0477523	0.0140014	0.0272374		-0.0128313	0.00437474	0.00335668	-0.0263203	0.0040962	1.31387e-10	RP11-123O22.1
4	q13.3	rs7697556	73015313:74015313	CED	0.0219277	-0.00795323	0.00347054	0.122615	-0.00497533	0.00322258	0.0593944		0.0417474	-0.155865	0.0765505	0.203262	-0.105092	0.082598	0.0417982		-0.00825663	0.00346698	0.0172421	-0.00512749	0.00322013	0.111312	ADAMTS3, HNRNPA1P67	ADAMTS3
22	q13.2	rs28489620	41304716:42304716	CED	0.0219524	-0.00881065	0.00384541	4.29603e-08	-0.0195396	0.00356662	0.00108017	SSE_Female	0.479333	-0.00433635	0.00613012	0.000795027	-0.0208548	0.00621646	0.00149695		-0.00754718	0.00325753	0.0205125	-0.0198653	0.00309361	1.35026e-10	TEF, CTA-223H9.9	CENPM, CYP2D7, DESI1, SMDT1, CCDC134, PMM1, CYP2D8P, CYP2D6, MCHR1, MEI1, SNU13, L3MBTL2, NDUFA6, WBP2NL, TEF
2	p16.3	rs10189177	50244732:51244732	AED	0.0220402	-0.00825042	0.00360328	3.23805e-07	-0.0170879	0.00334453	0.0125041		0.48588	-0.00378765	0.00543512	0.000879259	-0.0183971	0.00552998	0.029771		-0.00688783	0.00300323	0.0218209	-0.0174385	0.00286183	1.10481e-09	NRXN1
9	q33.3	rs2789520	129454223:130454223	CED	0.0259155	-0.00784424	0.00352155	1.8371e-09	-0.0197211	0.00328035	0.0135939		0.000832134	0.0180401	0.00539769	0.220849	0.00678218	0.00553968	0.0535879		-0.000116077	0.00294936	0.968606	-0.0128405	0.0028226	5.38594e-06	RALGPS1	ZBTB34, SLC2A8, RALGPS1
3	p22.1	rs2041376	41939589:42939589	AED	0.0275841	-0.00814208	0.00369562	4.76995e-07	-0.0172927	0.00343415	0.0171596		0.000182397	0.0228316	0.00610038	0.187883	0.0082678	0.00627828	0.0301092		0.000173385	0.00316085	0.956255	-0.0114063	0.00301288	0.000153191	LYZL4	VIPR1
18	q11.2	rs7238093	20228158:21228158	AED	0.0294125	-0.00783293	0.0035965	3.37618e-06	-0.0154537	0.00332579	0.00334003		0.00303593	-0.0169371	0.00571369	0.0205784	-0.0135836	0.00586584	0.00473744		-0.0104165	0.00304372	0.00062097	-0.0149988	0.00289313	2.16854e-07	CABLES1	CABLES1, RBBP8
11	q13.1	rs44205	65064786:66064786	AED	0.0311094	-0.00793225	0.00367968	1.9546e-07	-0.0177564	0.00341221	0.00089213		0.000297847	0.0195455	0.00540296	0.337708	0.00532056	0.00554968	0.00397548		0.000774335	0.00304134	0.79903	-0.0114257	0.00290673	8.46763e-05	OVOL1, CFL1	OVOL1-AS1, CTSF, OVOL1, MAP3K11, LTBP3, PCNX3, KRT8P26, CTSW, SIPA1
1	q25.1	rs181516391	173797147:174797147	AED	0.0335478	0.0118464	0.00557353	2.35574e-06	0.0243778	0.00516437	0.0177864		9.28252e-05	-0.058846	0.0150536	0.0659736	-0.0289926	0.0157684	0.0524972		0.00332402	0.00522678	0.524803	0.0192076	0.00490785	9.09134e-05	RABGAP1L	PRDX6, SERPINC1, SLC9C2, DARS2, RC3H1
10	q26.13	rs4962424	126230214:127230214	SSE	0.0347597	0.00779187	0.00369079	9.52692e-09	0.0197119	0.00343461	0.00307939		1.84937e-05	0.0255047	0.00595489	0.0166093	0.0146634	0.00612165	0.00530019		0.0127077	0.00313711	5.10474e-05	0.0185032	0.00299536	6.52179e-10	CTBP2	ZRANB1, CTBP2
17	p13.3	rs12937079	1364044:2364044	CED	0.0354877	-0.00772765	0.00367499	9.53292e-09	-0.0196308	0.00342054	0.00443562		0.417335	0.00531955	0.00655874	0.0107728	0.016972	0.00665541	0.106191		-0.00461014	0.00320601	0.150443	-0.0119826	0.00304226	8.19161e-05	RTN4RL1
12	q14.1	rs11173522	60453472:61453472	CED	0.0356454	0.00889196	0.00423232	1.1505e-07	0.020815	0.00392633	0.00848981		0.00388832	0.0242948	0.00841439	0.25424	0.00973036	0.00853444	0.0174485		0.012002	0.00378098	0.00150194	0.0188787	0.00356696	1.20543e-07	RP11-154D9.1, RP11-471N19.1
4	q21.21	rs7696324	81776881:82776881	CED	0.0356993	0.00746131	0.00355241	0.773958	0.000948165	0.00330139	0.0521051		0.543694	0.00581342	0.00957346	0.019047	-0.0231505	0.00987355	0.0176002		0.00726187	0.00333051	0.0292272	-0.00147517	0.003131	0.637535	RNU5A-2P, RASGEF1B	PRKG2
16	p11.2	rs9746755	30019628:31019628	CED	0.0382856	0.00720881	0.00347949	1.43189e-07	0.0170074	0.00323255	0.0153149		0.183874	0.00843216	0.00634499	0.000193089	0.0242389	0.00650145	0.000753128		0.00749165	0.00305086	0.0140657	0.0184408	0.00289451	1.87865e-10	ITGAL	ITGAL, CCDC189, ZNF689, ZNF668, HIP1, INO80E, MAPK3, STX4, BCKDK, SEPHS2, KAT8, STX1B, ITGAX, HSD3B7, VKORC1
13	q21.1	rs35559811	58166728:59166728	SSE	0.0402153	-0.00849419	0.00414039	1.46239e-11	-0.0258699	0.00383144	0.00141184	SSE_Female	0.257069	-0.00702338	0.00619693	0.000105493	-0.0246198	0.00634863	1.58228e-05	SSE	-0.00804025	0.00344268	0.0195191	-0.0255361	0.00328035	6.99412e-15	RNA5SP30, LINC00374
6	q22.31	rs9387640	119008871:120008871	AED	0.0425966	-0.0073091	0.0036047	7.42955e-08	-0.0180543	0.0033554	0.0078273		0.542212	0.00382444	0.00627494	0.00677236	-0.0174027	0.00642646	0.00592858		-0.00454662	0.00312567	0.145778	-0.0179147	0.00297438	1.71201e-09	MAN1A1	MAN1A1
12	q15	rs1585705	69292102:70292102	CED	0.0461431	-0.00749834	0.00376027	3.75185e-06	-0.0161809	0.00349871	0.0286608		0.000657051	0.0183649	0.00538999	0.289062	0.00585848	0.00552585	0.0196652		0.000968502	0.00308395	0.753486	-0.00987401	0.00295602	0.000836853	YEATS4, RN7SL804P	YEATS4, AC020656.1, CPSF6, RAB3IP, LYZ, ZNF131
20	q11.22	rs6060314	33311062:34311062	OED	0.0463725	-0.0167942	0.00843081	0.00636954	0.0213074	0.00781018	0.000915298		0.947619	-0.000436184	0.0066393	0.00482399	-0.0190365	0.00675362	0.0247643		-0.00669768	0.00521606	0.199125	-0.00177606	0.00510856	0.728093	MMP24-AS1	UQCC1, TRPC4AP, CPNE1, GGT7, MMP24OS, EDEM2, EIF6
12	q24.31	rs11065389	120937964:121937964	CED	0.0470772	-0.0265358	0.013364	6.79811e-06	-0.0549162	0.0122035	0.0463126		0.331922	-0.0170033	0.0175244	0.0512597	-0.0334399	0.0171543	0.0478532		-0.0230306	0.0106266	0.0302152	-0.0476996	0.00994397	1.61191e-06	HNF1A	CAMKK2, COQ5, P2RX7, RNF10, C12orf43
18	q11.2	rs7241413	20461635:21461635	AED	0.0470847	-0.00690104	0.00347563	0.00043487	-0.0113011	0.00321235	0.126759		0.000874606	0.0291581	0.00876054	0.41235	-0.00739634	0.00902243	0.00182618		-0.00199719	0.00323066	0.536445	-0.0108618	0.00302626	0.000331716	TMEM241	TMEM241, RIOK3, RMC1
8	p23.1	rs13272451	8386183:9386183	CED	0.0479078	0.00690397	0.00349003	1.74227e-08	0.0182733	0.00324221	0.00982729	CED	0.100648	-0.00887851	0.00540791	0.00125221	-0.0180398	0.00559037	0.00494046		0.00226349	0.0029324	0.440179	0.00913339	0.00280466	0.00112791	ERI1	TDH, FAM86B3P, NEIL2, FDFT1, FAM85B, RPL10P19, CLDN23, PRAG1, BLK, MFHAS1, AC103957.2, RP1L1, ALG1L13P, FAM66A, FAM86B1, FAM167A, ERI1, MSRA
22	q13.32	rs10854853	48374412:49374412	CED	0.0484015	0.00693776	0.00351485	2.75395e-07	0.0167899	0.00326669	0.00937122		0.162403	-0.0104756	0.00749827	0.0139618	-0.0190528	0.00775023	0.0242884		0.00380079	0.00318255	0.232376	0.0113828	0.00301022	0.000155967	RP11-536P6.3, FAM19A5	FAM19A5
8	p23.2	rs62489440	4320914:5320914	CED	0.0500436	0.00916304	0.00467596	3.40469e-08	0.0238998	0.00433009	0.0193308		0.613971	-0.00551522	0.0109338	0.0295117	0.0242644	0.0111476	0.0087599		0.00689355	0.0042993	0.108844	0.0239476	0.00403629	2.97308e-09	CSMD1	CSMD1
12	q24.21	rs7962636	115950006:116950006	CED	0.0546759	-0.00698949	0.0036376	3.26242e-06	-0.0157276	0.00337958	0.00842251		0.774625	0.00254395	0.00888458	0.0123406	0.0229732	0.0091806	0.0194262		-0.00562082	0.00336637	0.0949795	-0.011109	0.00317151	0.000460494	MED13L
1	q25.3	rs6673341	184155649:185155649	CED	0.0554889	0.0066735	0.00348478	4.89084e-08	0.0176527	0.0032358	0.0209562		0.141057	0.00806662	0.00548041	0.00161651	0.0177131	0.00561765	0.0759794		0.00707459	0.00294064	0.0161372	0.0176677	0.00280392	2.95545e-10	SNORD112, EDEM3	EDEM3
1	p31.1	rs143930681	77497659:78497659	CED	0.0578299	-0.0105503	0.00556159	8.87055e-07	-0.0254814	0.00518407	0.0234503		0.120451	-0.020504	0.0132035	0.0356145	-0.0287997	0.0137052	0.106853		-0.0120502	0.00512545	0.0187201	-0.0258967	0.00484879	9.25006e-08	AK5	DNAJB4, NEXN, AK5
18	q11.2	rs1668091	21790711:22790711	SSE	0.0584225	-0.00706923	0.00373534	1.69487e-09	-0.020873	0.00346444	0.00313865		0.0477428	-0.0130381	0.00658583	0.0001217	-0.026022	0.0067712	0.0408854		-0.00852202	0.00324912	0.00871919	-0.0219413	0.00308419	1.12644e-12	RP11-449D8.3, RP11-449D8.5
10	q26.3	rs7081254	132455696:133455696	CED	0.06073	-0.00803573	0.00428465	1.54209e-07	-0.0209142	0.00398544	0.00580605		0.628785	0.00356664	0.00737759	0.0365655	0.0156369	0.00747942	0.0338877		-0.0051094	0.00370512	0.167892	-0.0128312	0.00351726	0.000264236	TCERG1L	TCERG1L-AS1, TCERG1L
7	q11.22	rs10237317	69545941:70545941	CED	0.0608005	-0.00650535	0.0034696	2.57059e-07	-0.0165894	0.00321957	0.0176919		0.00642096	0.0149556	0.00548697	0.708758	0.00211362	0.00565854	0.0222921		-0.000375327	0.00293251	0.898158	-0.0120154	0.00279832	1.75657e-05	AUTS2
14	q32.32	rs3759584	103490799:104490799	AED	0.0612042	-0.00679662	0.00363062	4.07313e-08	-0.0184578	0.00336337	0.00644286	AED	0.166617	-0.0080032	0.00578606	0.00240146	-0.0178594	0.00588318	0.0100032		-0.00713748	0.00307533	0.0202932	-0.0183104	0.00291989	3.58924e-10	CKB, RP11-600F24.7	ZFYVE21, TRMT61A, APOPT1, PPP1R13B, TDRD9, XRCC3, CKB, AL049840.1, KLC1, BAG5, MARK3
17	q21.32	rs4794333	45545495:46545495	CED	0.0625571	-0.00656289	0.003524	1.02695e-07	-0.0174675	0.00328207	0.0235491		0.894845	-0.00097992	0.00741367	0.0201917	-0.017694	0.00761736	0.030883		-0.00553393	0.00318273	0.0820814	-0.017503	0.00301419	6.36551e-09	CDK5RAP3	SNX11, PNPO, LRRC46, TBKBP1, CDK5RAP3, NFE2L1, SP2, COPZ2, MRPL10, CBX1, SP6, SCRN2, SKAP1
6	p21.32	rs377763	31699144:32699144	AED	0.0642728	0.00697885	0.00377175	1.16076e-06	0.0170773	0.00351213	0.00880315		8.95135e-05	-0.02145	0.0054749	0.293238	-0.00589061	0.00560446	0.00200119		-0.00217106	0.00310602	0.484563	0.0106009	0.00297605	0.000367941	NOTCH4, XXbac-BPG154L12.4	ATF6B, CLIC1, LST1, HLA-DQA1, HLA-H, HLA-DRB9, CUEDC2, RNF5, HLA-DRB5, BTN3A2, HLA-DQB1-AS1, HLA-DOB, HSPA1B, GPANK1, HLA-C, HCP5, C4A, VWA7, CSNK2B, TNXA, IER3, CYP21A1P, SLC44A4, TNXB, HLA-DQB1, BAG6, HLA-DPB2, DDAH2, HLA-DRB1, C4B, PSMB9, PRRC2A, HLA-DQA2, CYP21A2, PBX2, NOTCH4, LY6G5C, VARS2, HLA-B, HLA-DPB1, SKIV2L, APOM, HLA-DRB6, AGER, B2M
16	q23.3	rs12926506	81222413:82222413	CED	0.0679045	-0.00848115	0.00464555	1.09893e-08	-0.0246671	0.00431623	0.0106953		0.00847723	0.0147973	0.00562079	0.381801	0.00503864	0.00576113	0.0558921		0.00096654	0.00358083	0.787221	-0.0139877	0.00345431	5.13636e-05	CMIP	CMIP
3	q29	rs13314605	194364804:195364804	CED	0.0685491	-0.00729316	0.00400417	9.74907e-07	-0.0181676	0.0037101	0.03242		0.598444	-0.00433959	0.00824007	0.00274235	-0.0253388	0.0084592	0.00476988		-0.00672895	0.00360147	0.0617076	-0.0193245	0.00339768	1.28865e-08	XXYLT1	XXYLT1
1	q32.1	rs116300643	202989485:203989485	AED	0.0689361	0.00848831	0.00466685	8.2146e-07	0.0213994	0.00434033	0.00162827		0.0456336	0.0127732	0.0063903	0.187326	0.00864444	0.00655601	0.065091		0.00997872	0.00376881	0.0081039	0.0175126	0.00361909	1.3053e-06	OPTC, ATP2B4
6	p21.33	rs41315816	31444851:32444851	AED	0.0720085	0.0117871	0.00655173	2.3602e-05	0.0256915	0.0060767	0.0681149		0.937927	0.00172099	0.0220992	0.00649568	0.0620907	0.0228124	0.0286686		0.0109738	0.00628149	0.0806355	0.0281031	0.00587194	1.70134e-06	STK19	HLA-DRB5, DXO, TNXB, LST1, MICB, HLA-B, TAP2, MICA, HLA-DQB1, AGPAT1, HLA-DRB6, TNXA
17	p13.2	rs8081417	3402650:4402650	CED	0.0741303	0.00667131	0.00373571	3.40843e-05	0.0143646	0.00346602	0.0196246		9.5453e-06	0.0244378	0.00551902	0.409666	0.00463684	0.00562389	0.00025065		0.0122537	0.00309364	7.46614e-05	0.0116868	0.00295065	7.47139e-05	RP11-459C13.1, ZZEF1	ZZEF1, ANKFY1, UBE2G1
2	q11.2	rs13002946	100301959:101301959	SSE	0.0794552	-0.00689162	0.00392938	3.55608e-14	-0.0276254	0.00364603	2.47258e-05	SSE_Female	0.012883	0.0149112	0.00599537	1.55197e-06	0.0296555	0.00617165	0.000638085	SSE	-0.000340302	0.00328643	0.917528	-0.0128059	0.00313915	4.51479e-05	AFF3, LINC01104	LONRF2, AFF3
12	q23.1	rs670104	99039421:100039421	SSE	0.0801069	-0.0063582	0.0036331	8.68933e-09	-0.0194292	0.0033762	0.00246754		0.685056	0.00246126	0.00606854	0.0123186	-0.0156191	0.00624016	0.00816831		-0.0040312	0.00311717	0.195934	-0.0185664	0.00296944	4.03925e-10	ANKS1B	ANKS1B
6	p21.33	rs3020582	30851522:31851522	AED	0.0857006	0.00784941	0.00456749	6.26889e-05	0.017109	0.00427454	0.0247821		4.8094e-05	-0.0243565	0.0059914	0.00385401	-0.0177465	0.00614057	0.00216344		-0.00398802	0.00363236	0.272243	0.00573193	0.00350823	0.10229	HLA-S, XXbac-BPG181B23.7	TSSC4, DDR1, LST1, HLA-DQA1, HLA-H, HLA-G, RNF5, ATP6V1G2, HLA-A, GALNT2, BTN3A2, KLRK1, TCF19, HCG27, POU5F1, CD248, MICA, HLA-C, CSNK2B, AL645933.2, IER3, PRRT1, PSORS1C3, SLC44A4, HLA-DQB1, BAG6, HLA-DRA, DDAH2, TMEM154, HLA-DRB1, VARS2, HLA-B, SKIV2L, WASF5P, B2M
8	p21.2	rs72609944	25235735:26235735	CED	0.088868	0.00703791	0.00413652	2.1429e-07	0.0198877	0.00383438	0.0227147		0.0100726	0.013998	0.00543934	0.477107	0.00397541	0.00559154	0.0033178		0.00958823	0.00329258	0.00359037	0.0147983	0.00316228	2.87399e-06	EBF2
5	q31.1	rs7738043	133370739:134370739	SSE	0.091657	-0.00634459	0.00376147	7.48636e-09	-0.0202139	0.00349728	0.00582744		0.0155295	0.0140621	0.00581097	0.470544	-0.00430661	0.00596813	0.0137209		-0.000318898	0.00315766	0.919557	-0.0161478	0.00301738	8.71821e-08	JADE2	CAMLG, SAR1B, JADE2, TXNDC15
1	q25.2	rs6425446	177264577:178264577	SSE	0.0919691	-0.00587372	0.00348566	6.03788e-09	-0.018799	0.00323231	0.00337587		0.0117056	-0.0146387	0.00580662	0.000948023	-0.0196391	0.00594089	0.0086856		-0.00819551	0.00298855	0.00610089	-0.0189909	0.00283927	2.25243e-11	RP11-63B19.1, SEC16B
18	q21.32	rs633647	57348184:58348184	AED	0.0965697	-0.00713346	0.0042928	3.5166e-06	-0.0185112	0.00399101	0.0443302		0.00468992	-0.0255858	0.00904797	0.730299	0.0032284	0.00936502	0.0134574		-0.0105239	0.00387842	0.00665853	-0.0151698	0.00367151	3.59987e-05	RNU4-17P, RP11-795H16.2
11	p15.1	rs7109186	21144254:22144254	OED	0.0972799	-0.00590647	0.00356199	1.93906e-06	0.0157534	0.00330966	8.40156e-06		0.0306374	-0.0117277	0.00542486	0.706864	0.00209216	0.00556318	0.0310541		-0.00766012	0.00297751	0.010092	0.0121822	0.00284436	1.84448e-05	NELL1, CTD-2019O4.1
16	q23.3	rs7206608	82372628:83372628	CED	0.10202	0.00605294	0.00370177	1.09013e-07	0.0182346	0.00343322	0.00542731		0.91633	0.000726445	0.00691468	0.00343796	0.0206346	0.00705271	0.0218931		0.00486643	0.00326353	0.135921	0.0186944	0.0030869	1.39514e-09	CDH13
16	p12.3	rs11074452	19870168:20870168	SSE	0.102817	-0.00566757	0.00347415	4.38627e-09	-0.0188994	0.00322011	0.00521709	AED	0.821019	0.00121467	0.00536903	0.0080979	0.0146339	0.0055262	0.00546702		-0.00363641	0.00291677	0.212499	-0.0103996	0.00278223	0.000185595	UMOD, PDILT
4	q13.2	rs1383723	67303507:68303507	SSE	0.102999	-0.00689065	0.00422611	6.79424e-11	-0.0255253	0.00391162	0.000683799		0.70315	0.00241581	0.00633945	0.0325924	-0.0138408	0.00647632	0.0158105		-0.0040273	0.00351638	0.252086	-0.0224021	0.00334828	2.22208e-11	RNU6-699P, RP11-584P21.2
13	q21.1	rs6561943	57856761:58856761	SSE	0.104318	-0.00653214	0.00402156	3.62999e-10	-0.0234436	0.00373932	0.000736796		0.56929	0.0032936	0.00578736	0.00077595	0.0199009	0.00592027	0.000511938		-0.00333257	0.0033025	0.312924	-0.011083	0.0031615	0.00045555	PCDH17, RNA5SP30
14	q23.3	rs146131663	64636604:65636604	AED	0.107418	-0.0280939	0.0174505	7.60947e-07	-0.0797852	0.0161336	0.0296279		0.406719	-0.0276629	0.0333412	0.0988473	-0.0547099	0.0331474	0.172117		-0.0280012	0.0154609	0.0701248	-0.0749826	0.0145065	2.35501e-07	RP11-973N13.2, PLEKHG3
2	q12.1	rs533493779	103947054:104947054	CED	0.107829	-0.00557423	0.00346648	2.39112e-06	-0.0151899	0.00322002	0.035432		0.827343	-0.00117317	0.00537874	4.27707e-05	0.0225857	0.00551891	0.00102466		-0.00428269	0.00291378	0.141615	-0.00559629	0.00278124	0.0442036	AC018880.2, AC013727.1
2	p23.2	rs4665434	28476403:29476403	AED	0.116184	0.00599363	0.00381516	2.66491e-05	0.0148748	0.00354122	0.00473826		0.482117	0.00636019	0.00904837	0.0193822	0.0216627	0.00926472	0.0555084		0.00604896	0.00351545	0.0853088	0.0157401	0.00330782	1.95094e-06	PPP1CB	TRMT61B, PLB1, WDR43, CLIP4, SPDYA, PPP1CB, TOGARAM2
20	q11.23	rs6141600	34212310:35212310	AED	0.116197	-0.00650556	0.00414117	0.00645596	-0.0105088	0.00385828	0.00603682		0.657848	-0.00642158	0.0144992	0.0205893	0.0348538	0.0150522	0.0136458		-0.00649923	0.00398194	0.102642	-0.00771208	0.00373745	0.039069	EPB41L1	UQCC1, CPNE1, EPB41L1, RBM39, AAR2, SCAND1
6	p21.1	rs2479717	41405174:42405174	CED	0.123158	0.00650549	0.00421979	0.000519367	0.0135929	0.00391656	0.0864229		0.00963039	0.013939	0.00538396	0.748985	0.00177217	0.00553839	0.0478856		0.0093342	0.00332123	0.00494702	0.00965222	0.00319777	0.00254094	CCND3	BYSL, CCND3, FRS3, USP49, MED20
4	q31.3	rs750090	152431436:153431436	SSE	0.125058	-0.00560758	0.00365579	1.64715e-11	-0.0228696	0.00339577	0.000403197		0.00213828	-0.0215577	0.00702075	0.904755	-0.000861223	0.00719737	0.0068092		-0.00900983	0.00324253	0.00545873	-0.0188625	0.00307111	8.15371e-10	RNA5SP169, RP11-18H21.1	AC097375.2, FAM160A1, GATB
13	q34	rs1135496	114552933:115552933	CED	0.12628	-0.00738095	0.00482748	1.64478e-05	-0.0192281	0.00446287	0.00987732		0.0357594	-0.0351139	0.016723	0.224884	0.0206111	0.0169826	0.00475825		-0.00951423	0.0046381	0.0402356	-0.0166546	0.00431632	0.000114079	UPF3A	UPF3A, CDC16, RASA3
4	q27	rs66824650	120980871:121980871	AED	0.132145	0.0099056	0.00657872	2.33984e-07	-0.0314583	0.00608446	3.9126e-06		0.0418568	-0.011778	0.00578765	0.46365	-0.00433456	0.00591461	0.0723915		-0.00231764	0.0043454	0.593789	-0.0175126	0.00424104	3.63851e-05	RP11-679C8.2, RP11-501E14.1
6	q12	rs117050940	69400842:70400842	CED	0.135216	0.00734202	0.00491482	1.75175e-06	0.021764	0.00455287	0.00446359		0.899167	-0.000984631	0.00777049	0.0087016	-0.0209282	0.00797662	0.0168958		0.00496275	0.0041537	0.232174	0.0112732	0.00395411	0.00435799	BAI3
6	p21.1	rs567230078	43088227:44088227	CED	0.140503	-0.0158194	0.0107328	2.93234e-07	-0.0509808	0.00994179	0.0122597		0.60779	0.00508813	0.00991383	0.0146899	-0.0247187	0.0101305	0.0077079		-0.00453762	0.00728247	0.533227	-0.0380966	0.00709569	7.91808e-08	GTPBP2
9	p21.1	rs60131931	29208929:30208929	CED	0.143082	-0.00520943	0.00355734	1.37171e-06	-0.0159958	0.00331228	0.000909269		0.721609	0.00210393	0.00590473	0.00665532	-0.0163304	0.00601765	0.000982875		-0.00326189	0.00304709	0.284397	-0.0160736	0.00290175	3.03715e-08	RP11-48L13.1, RP11-460C6.1
1	q25.3	rs3814333	183507119:184507119	AED	0.14401	-0.0108376	0.00741777	0.00011853	0.0263636	0.00684906	0.000205063		0.00861999	-0.0231631	0.00881756	0.0780796	0.0161152	0.00914607	0.000994983		-0.0159455	0.00567633	0.00496767	0.0226814	0.00548227	3.51521e-05	COLGALT2, TSEN15	COLGALT2, TSEN15
15	q26.1	rs530742363	88899167:89899167	CED	0.144502	-0.00527378	0.00361407	0.0159731	-0.00808795	0.00335662	0.413381		0.00580286	0.0159182	0.00576975	0.84047	-0.00120819	0.00600213	0.0198394		0.000697957	0.00306282	0.819739	-0.00644892	0.00292962	0.0277161	ACAN
15	q25.2	rs2730101	83800654:84800654	CED	0.149641	0.00540599	0.00375206	0.000312034	0.0125826	0.00349017	0.161368		0.368216	-0.00495464	0.00550618	0.000312256	-0.0202405	0.00561423	0.00335264		0.00212064	0.00310062	0.494013	0.00343341	0.00296409	0.246728	SH3GL3, ADAMTSL3	SH3GL3, ADAMTSL3, WHAMM, GOLGA6L5P
20	p11.1	rs2252934	25457535:26457535	AED	0.149702	0.00505325	0.00350776	5.02551e-07	0.01635	0.0032534	0.00041971		0.00683122	-0.0275636	0.0101894	0.894131	-0.00140951	0.0105914	0.0071809		0.00159733	0.00331673	0.630092	0.0148188	0.00310998	1.88946e-06	RP4-760C5.5, RP4-760C5.3	NINL, FAM182A, ENTPD6, AL078587.1, ABHD12, ZNF337, AL390198.2, NANP, GINS1, FAM182B, PYGB
1	p13.2	rs197419	111815450:112815450	CED	0.158163	0.00501492	0.00355345	1.41896e-08	0.0186939	0.00329621	0.00384262		0.0636313	0.0146794	0.00791423	1.98212e-05	0.0345051	0.00808578	0.00853163		0.00663637	0.00324169	0.0406388	0.020947	0.00305233	6.76036e-12	KCND3	INKA2, DDX20
4	q27	rs769246	122241343:123241343	OED	0.173157	-0.00503129	0.00369368	0.000159373	0.012985	0.00343877	0.000321447		0.0588805	0.0111123	0.00588215	0.60783	0.00308897	0.0060193	0.0375469		-0.000465828	0.00312808	0.881618	0.0105499	0.00298587	0.000410417	CCNA2	BBS7, CCNA2, EXOSC9, ANXA5
15	q12	rs12101625	26472431:27472431	CED	0.17442	-0.00486567	0.00358259	4.24307e-07	-0.0167907	0.0033197	0.0146242		0.00337623	0.0162729	0.00555115	0.858164	-0.0010125	0.00566553	0.0146565		0.00134994	0.00301014	0.65382	-0.0127581	0.00286422	8.4175e-06	GABRB3	GABRB3
5	q14.3	rs77156384	87209219:88209219	SSE	0.195439	-0.0161197	0.0124509	3.03379e-08	-0.0636862	0.0114963	0.00500311		0.0129526	-0.117381	0.0472318	0.70729	0.0181762	0.0484053	0.0225151		-0.0226993	0.0120396	0.0593778	-0.0593152	0.0111852	1.13902e-07	CTC-498M16.2
1	q43	rs12037698	243084345:244084345	SSE	0.197602	-0.00640825	0.00497373	1.84691e-11	-0.0310101	0.00461593	5.99091e-07		0.0123404	-0.0188725	0.00754176	0.949111	-0.000491972	0.00770837	0.00204643		-0.0101862	0.00415209	0.0141566	-0.0229551	0.00396019	6.77228e-09	SDCCAG8	CEP170, SDCCAG8
10	q22.3	rs1720305	79478483:80478483	SSE	0.19853	0.00489773	0.00380922	4.43979e-08	0.019356	0.00353687	0.00400416		0.143707	-0.0107451	0.00734882	0.0111548	-0.0189452	0.00746486	0.0354146		0.0015849	0.00338189	0.639326	0.0123341	0.00319626	0.000113884	GNAI2P2, LINC00856
17	q12	rs7226064	31737258:32737258	SSE	0.206656	-0.00446804	0.00353814	2.79667e-08	-0.0182712	0.00328976	2.2685e-05		0.0254035	-0.154816	0.0692591	0.727566	-0.0274676	0.0788466	0.10663		-0.00485939	0.00353353	0.169063	-0.0182872	0.0032869	2.64181e-08	ASIC2
2	p16.1	rs56361700	55634212:56634212	CED	0.208116	0.00926681	0.00736181	0.00112341	0.0225087	0.0069094	0.00296314		0.0177364	-0.0199391	0.0084089	0.499099	-0.00580615	0.00859008	0.0307722		-0.00340554	0.00553901	0.538668	0.0113859	0.0053839	0.0344465	EFEMP1
2	p15	rs901529	62317468:63317468	CED	0.214781	0.00431277	0.00347655	1.12688e-07	0.0171395	0.0032307	0.00178252		0.944175	-0.000695819	0.00993693	0.027652	0.0224521	0.010195	0.00484205		0.00376656	0.00328151	0.251046	0.0176243	0.00307976	1.04897e-08	AC092155.4	OTX1, WDPCP
11	q25	rs34535092	132850929:133850929	CED	0.221114	-0.00535535	0.0043768	3.36275e-07	-0.0206439	0.00404617	0.00437305		0.0221767	-0.0236255	0.0103284	0.110496	-0.0170118	0.010659	0.045171		-0.00813675	0.0040299	0.0434771	-0.0201864	0.00378279	9.48182e-08	OPCML	OPCML
1	p32.3	rs79711866	54441934:55441934	AED	0.23297	-0.00615725	0.00516225	1.74594e-05	-0.0204919	0.00477084	0.00147659		0.452339	-0.00591317	0.00786817	0.05488	0.0154245	0.00803408	0.0288816		-0.0060838	0.0043162	0.158679	-0.0111285	0.00410209	0.00666987	RP4-705F19.1, AC099796.1
8	p21.2	rs55968245	22857951:23857951	CED	0.24633	0.00474012	0.00408874	1.19273e-07	0.0201428	0.00380425	0.000497343		0.376609	-0.00605783	0.0068514	0.00475184	0.0197074	0.00697967	0.00421484		0.00190444	0.00351105	0.587534	0.0200431	0.00334031	1.96866e-09	CTC-756D1.3, SLC25A37	NKX3-1, ENTPD4, DNAJC5, LOXL2
1	p31.1	rs4650620	78194705:79194705	AED	0.250117	-0.00452924	0.00393823	1.88674e-06	-0.0174137	0.00365423	0.00017743		0.599863	-0.00326103	0.0062162	0.0643215	-0.0118234	0.00639102	0.0344489		-0.004166	0.00332678	0.210473	-0.0160364	0.00317229	4.30063e-07	RNFT1P2, RP11-183M13.1	PTGFR, DNAJB4, NEXN
1	p13.3	rs11802147	107501307:108501307	AED	0.251873	-0.0043343	0.00378271	2.5676e-07	-0.0180914	0.00351092	1.09646e-05		0.0124876	-0.0148613	0.0059488	0.901066	0.000757315	0.00609187	0.0333029		-0.00736526	0.00319203	0.0210331	-0.0133917	0.00304189	1.07042e-05	NTNG1
8	p11.23	rs12681990	36359186:37359186	AED	0.252602	-0.00570637	0.00498784	3.14621e-06	-0.0215945	0.00463284	0.00768961		0.53902	-0.0033019	0.00537505	0.0684852	-0.0100615	0.00552269	0.0237993		-0.00459385	0.00365617	0.208947	-0.0168308	0.00354936	2.11677e-06	AC090453.1, RP11-419C23.1	ZNF703
18	q21.32	rs62097787	57481057:58481057	AED	0.255307	-0.00481457	0.00423238	1.07643e-06	-0.019278	0.00395261	0.0125054		0.00657137	-0.0295796	0.0108829	0.647367	-0.00514982	0.0112582	0.0593594		-0.00806807	0.00394458	0.0408197	-0.0177276	0.00372944	1.99992e-06	RP11-396N11.1, MC4R
19	p13.3	rs8107139	2962045:3962045	CED	0.257195	0.00528453	0.00466399	1.72852e-06	0.0205798	0.00430272	0.0159356		0.175573	0.00742084	0.00547849	0.00048683	0.0195242	0.00559725	0.0137594		0.00618223	0.00355135	0.0817168	0.0201877	0.00341128	3.26023e-09	NFIC	NFIC, MFSD12, C19orf71, SMIM24, CHST1
16	q21	rs1423771	64808280:65808280	CED	0.275239	0.0038175	0.00349882	3.54845e-06	0.0150687	0.00325013	0.00581102		0.352136	0.0150775	0.0162043	0.0210257	-0.0380349	0.0164824	0.0107848		0.00431907	0.00342001	0.206631	0.0130812	0.00318873	4.09044e-05	RP11-256I9.3
11	q13.1	rs10896012	64778461:65778461	SSE	0.282903	0.0045138	0.00420348	1.29605e-08	0.0221962	0.00390309	3.33876e-06		0.834951	-0.00253191	0.0121517	0.0056589	0.0341026	0.0123245	0.000162076		0.00376082	0.00397252	0.343787	0.0232815	0.00372095	3.92788e-10	MALAT1, SNRPGP19	CTSW, MALAT1, SNX32, RNASEH2C, LTBP3, AP000769.1, FIBP, NEAT1, EHBP1L1, CAPN1, SSSCA1, MAP3K11, SPDYC
10	q26.13	rs6585827	123665615:124665615	AED	0.288561	0.00368183	0.00346921	0.00036482	0.0114918	0.00322408	0.00456184		0.3248	-0.00933928	0.0094848	0.0863235	-0.0167185	0.00974749	0.0432364		0.00214537	0.00325811	0.510236	0.00870988	0.00306099	0.00443488	PLEKHA1	ARMS2, PLEKHA1, HTRA1
10	q21.1	rs4595495	53173286:54173286	AED	0.297521	0.00365967	0.00351294	1.35791e-06	0.0157517	0.00326039	0.0110573		0.609899	0.00317636	0.00622545	0.00025964	0.023273	0.00637115	0.0120326		0.00354294	0.00305945	0.246851	0.0173126	0.00290242	2.44805e-09	PRKG1	PRKG1, CSTF2T
5	q22.2	rs2546109	111662299:112662299	AED	0.306161	-0.00422199	0.0041258	2.55753e-05	-0.0160724	0.00381788	0.00414524		0.00414721	0.0253119	0.00882887	0.768191	0.0026692	0.00905601	0.00245289		0.00107154	0.00373781	0.774361	-0.0132441	0.00351802	0.000166793	APC
11	q23.1	rs80331414	110141812:111141812	CED	0.30639	0.00525651	0.00513919	5.11574e-08	0.0260265	0.00477774	0.000603573		0.00823744	0.0185204	0.00700908	0.715743	-0.00262947	0.00722072	0.0129904		0.0098941	0.00414449	0.0169733	0.0173008	0.00398448	1.41157e-05	ARHGAP20, HNRNPA1P60	FDX1
17	q21.32	rs72827899	46051866:47051866	CED	0.31119	-0.0041556	0.00410337	0.000713342	-0.0129141	0.00381571	0.118032		0.771313	-0.00327837	0.011279	0.00959045	0.0296921	0.0114624	0.0156077		-0.00405307	0.00385611	0.293224	-0.00866369	0.00362038	0.0167098	RP11-433M22.2, Y_RNA	SNX11, HOXB3, PNPO, LRRC46, HOXB2, HOXB4, TBKBP1, CDK5RAP3, NFE2L1, SP2, COPZ2, MRPL10, CBX1, SP6, SKAP1
18	q12.1	rs1941697	30751276:31751276	AED	0.314273	0.00350379	0.00348185	8.61341e-06	0.0144003	0.0032364	0.00017311		0.0728806	0.0151819	0.00846431	0.557523	0.00517174	0.00881752	0.0225313		0.0051939	0.00322005	0.106747	0.0133046	0.00303821	1.19169e-05	ASXL3	AP1S1, EFCAB1, TMEM41A, GRM8
16	q23.1	rs13330107	76378862:77378862	SSE	0.316044	0.00359673	0.00358732	1.28735e-08	0.0189473	0.00333111	0.00114449		0.195417	-0.009385	0.00724853	0.0372949	-0.0154059	0.0073975	0.0141915		0.00104269	0.00321512	0.745706	0.0131558	0.00303737	1.48223e-05	CTD-2336H13.2
2	q31.1	rs4668314	171131258:172131258	CED	0.317116	-0.00356524	0.0035638	4.17451e-07	-0.0167512	0.00330986	0.00291428		0.0793621	0.00947896	0.0054028	0.000378014	-0.0195987	0.00551258	8.25588e-05		0.000389557	0.0029749	0.895816	-0.0175057	0.00283766	6.86891e-10	AC007405.6	GAD1, AC007277.1, AC007405.1, AC007405.3
11	q23.2	rs1245138	112508370:113508370	AED	0.323281	0.00348117	0.00352438	1.90681e-06	0.0155489	0.00326438	0.00501385		0.306563	-0.0066213	0.00647575	0.0143521	0.0163681	0.00668514	0.000929453		0.00117261	0.00309561	0.704838	0.0157066	0.00293334	8.57886e-08	NCAM1
1	q22	rs4276913	154631673:155631673	SSE	0.331707	0.00341804	0.00352127	1.79439e-08	-0.0184388	0.00327454	2.87559e-06	SSE_Female	0.668246	-0.00236338	0.00551468	1.56369e-05	0.0244458	0.0056587	0.000297257	SSE	0.00174357	0.00296785	0.556877	-0.00768079	0.00283421	0.00672772	HMGN2P18, KRTCAP2	MUC1, MTX1, MSX1, ADAM15, GBA, EFNA1, KRTCAP2, GBAP1, SLC50A1, MTX1P1, EFNA3, THBS3, DPM3
7	q31.1	rs2045293	113850102:114850102	AED	0.340804	0.00335783	0.00352499	8.9672e-08	0.0175069	0.00327434	0.0022797		0.213323	-0.00835394	0.00671266	0.00157457	-0.0218974	0.00692783	0.0275902		0.000826312	0.00312086	0.791186	0.0103119	0.00296034	0.000495221	FOXP2, MDFIC
2	p22.2	rs3770781	36578839:37578839	AED	0.343305	0.00344348	0.00363367	7.71866e-07	0.0166702	0.00337281	0.000582022		0.00960864	0.0139559	0.00538889	0.480768	0.00389487	0.00552405	0.026205		0.00672921	0.00301276	0.0255112	0.013201	0.00287865	4.52231e-06	STRN	CEBPZ, STRN, VIT
2	p22.2	rs4670169	36523044:37523044	CED	0.359391	0.00333754	0.0036415	1.89057e-07	0.0176041	0.00337891	0.0028248		0.0169455	-0.0255881	0.0107152	0.38014	-0.00972883	0.0110851	0.00836519		0.000342685	0.00344784	0.920827	0.0152804	0.00323209	2.27057e-06	VIT	CEBPZ, VIT
6	q22.31	rs4895799	125552729:126552729	AED	0.363258	-0.00323741	0.00356081	1.29346e-05	-0.0144519	0.00331365	0.0117903		0.896117	0.000716694	0.00548899	0.0275204	-0.0123463	0.00560143	0.0301139		-0.00206625	0.00298729	0.489138	-0.0139061	0.00285198	1.08298e-06	RP11-624M8.1	AL365259.1, NCOA7, IRAK1BP1, HEY2
8	q24.22	rs894344	135112745:136112745	AED	0.383124	-0.00334166	0.00383148	0.000163264	-0.0134211	0.00355992	0.000500204		0.0370017	0.0115753	0.00554952	0.849889	0.00106946	0.0056507	0.0461828		0.00147358	0.003153	0.640244	-0.00930394	0.00301202	0.00200875	ZFAT-AS1	ZFAT
2	p23.3	rs7596387	25023196:26023196	SSE	0.390984	-0.00489603	0.00570742	2.36061e-08	-0.0295635	0.00529482	0.000890759		0.0164405	-0.0131234	0.00547012	0.000161395	-0.0211132	0.00559557	0.040874		-0.0091843	0.00394919	0.0200389	-0.0255715	0.00384593	2.95124e-11	DNMT3A
15	q26.3	rs72755233	100192953:101192953	CED	0.404064	-0.00592992	0.00710692	0.28953	-0.00698367	0.00659362	0.583127		0.271078	-0.0094121	0.00855178	0.855679	0.00157285	0.00864782	0.183208		-0.00735241	0.00546583	0.178574	-0.00383806	0.00524337	0.464179	ADAMTS17
9	q34.11	rs2267958	130515279:131515279	CED	0.415668	-0.00286015	0.00351386	5.73774e-07	-0.01638	0.00327599	0.00133222		0.202718	0.00792185	0.00621872	0.0206892	0.0147717	0.00638446	0.0924235		-0.000250812	0.00305926	0.934659	-0.00988745	0.00291468	0.000693095	DNM1	DNM1, URM1, CIZ1
15	q24.3	rs2682928	77387308:78387308	CED	0.428209	-0.0028228	0.00356296	1.64469e-05	-0.0142797	0.00331433	0.00487908		4.45881e-05	0.024928	0.00610551	0.589705	-0.00338313	0.00627355	0.000467602		0.00422691	0.0030773	0.169573	-0.011902	0.00293051	4.87738e-05	RP11-307C19.2	HMG20A, AC046168.1, TSPAN3, LINGO1, PEAK1
20	q11.22	rs6142059	32044327:33044327	AED	0.428724	0.00274543	0.00346918	2.04828e-06	0.0153023	0.00322238	0.00281281		0.317205	-0.00830234	0.00830041	0.0979571	-0.0139376	0.00842216	0.0517001		0.00110254	0.00320086	0.730506	0.0115685	0.00300961	0.00012112	TPM3P2, PIGPP3	MAP1LC3A, PIGU, EIF2S2
18	q21.32	rs74394803	57724224:58724224	CED	0.436779	-0.00491687	0.00632277	2.1547e-07	-0.0303358	0.00584995	0.0031683		0.751706	0.00170253	0.00538105	0.0264919	-0.0122869	0.00553714	0.0350054		-0.00107798	0.00409789	0.792506	-0.0208159	0.00402139	2.26331e-07	AC010928.1, RP11-325K19.2
11	q13.2	rs12785906	66451966:67451966	CED	0.443793	-0.003265	0.00426348	0.00529859	-0.0110334	0.003957	0.181709		0.160435	-0.0168855	0.0120297	0.0815504	-0.0214514	0.0123156	0.156697		-0.00478493	0.00401856	0.233768	-0.0120083	0.00376732	0.00143519	KDM2A	LRFN4, CTSF, CARNS1, RAD9A, DOC2GP, CCS
8	q12.3	rs791405	64220735:65220735	SSE	0.444464	-0.00265676	0.00347436	2.73013e-10	-0.0203454	0.00322241	0.000132841		0.319088	0.00692487	0.00695025	0.0109628	0.018153	0.00713563	0.0179728		-0.000741109	0.0031077	0.811513	-0.0138241	0.00293683	2.51214e-06	RP11-32K4.1
11	p15.2	rs7927346	12335835:13335835	CED	0.456551	0.00277633	0.00372892	2.4311e-05	0.0145924	0.00345692	0.00435879		0.000870833	0.0271993	0.00816907	0.242293	0.00982765	0.0084048	0.003425		0.00698769	0.00339222	0.0394068	0.013903	0.00319706	1.3696e-05	TEAD1	LINC00958, TEAD1
6	q24.2	rs765874	142685557:143685557	CED	0.467219	0.00276434	0.00380233	7.34608e-07	0.017444	0.00352252	0.000462523		0.0535367	0.0107863	0.00558694	0.00419296	0.0163826	0.00572133	0.0147968		0.00530376	0.00314341	0.0915527	0.0171523	0.00299959	1.07653e-08	HIVEP2	HIVEP2
9	q34.12	rs10901308	133322094:134322094	CED	0.48194	-0.0024713	0.00351443	9.29546e-07	-0.0159691	0.00325492	0.000514548		0.000725823	0.0276172	0.00817087	0.736999	0.00281133	0.00837123	0.00565028		0.00222607	0.00322846	0.490499	-0.0135027	0.00303367	8.54923e-06	RP11-83J21.3, LAMC3
1	p31.1	rs11162409	78006970:79006970	CED	0.484404	-0.00268643	0.00384193	1.67133e-05	-0.0153275	0.00356047	0.00435067		0.447988	-0.00495693	0.00653274	0.156957	-0.00950024	0.00671202	0.11899		-0.00326991	0.00331168	0.323453	-0.0140478	0.00314533	7.96022e-06	GIPC2	AK5
15	q26.3	rs72633241	100318872:101318872	AED	0.484915	-0.00422334	0.00604698	4.93565e-06	0.0255744	0.00559905	0.000299469		0.00834314	-0.0294215	0.0111529	0.577149	-0.00640171	0.0114817	0.0599986		-0.00994796	0.0053159	0.0612952	0.0194313	0.00503256	0.000112873	ADAMTS17	LINS1
16	p13.3	rs8052518	7175119:8175119	AED	0.493301	0.00317168	0.00462971	1.19508e-05	0.0188605	0.00430743	0.00435117		0.0315054	0.0276089	0.012837	0.36411	0.0118592	0.0130669	0.13613		0.0059844	0.00435513	0.169409	0.0181743	0.00409089	8.88707e-06	RBFOX1
8	p21.3	rs11786089	21475521:22475521	SSE	0.500383	0.00235243	0.00349082	1.40391e-10	0.02074	0.00323264	9.50532e-05	CED	0.0392015	0.011517	0.00558495	0.00263544	0.0171916	0.0057162	0.0206346		0.00492699	0.00296016	0.0960255	0.0198802	0.00281385	1.60485e-12	HR	FAM160B2, NUDT18
12	q14.3	rs1351394	65851826:66851826	AED	0.510198	-0.00247178	0.00375349	0.00848507	0.00922934	0.00350637	0.00325203		0.216828	-0.00717063	0.00580604	0.107113	0.00958531	0.00594864	0.021912		-0.00385677	0.00315215	0.221128	0.00932113	0.00302067	0.00203017	HMGA2	HMGA2
4	q12	rs4864900	52428979:53428979	AED	0.512786	-0.00230706	0.00352488	5.80441e-05	-0.013133	0.00326634	0.00424995		0.000676895	0.0207508	0.0061048	0.0313933	0.0134077	0.00623001	0.0280034		0.00345807	0.00305258	0.257283	-0.00741047	0.00289285	0.0104177	SPATA18	ZAR1, OCIAD2, SLC10A4, SPATA18, SGCB, DCUN1D4
5	q31.1	rs247008	130947104:131947104	AED	0.529025	0.00268523	0.00426567	0.000577046	0.0136388	0.00396219	0.0203537		0.011802	0.0136818	0.00543327	0.920133	-0.000558552	0.00557067	0.0182668		0.00687861	0.00335517	0.0403497	0.00886933	0.00322878	0.00601507	snoZ6, AC063976.1	SLC22A5, MIR3936HG, CDC42SE2, ACSL6, SLC22A4, IRF1, RAD50, HINT1, MEIKIN, LYRM7, RAPGEF6, P4HA2
4	p15.31	rs11938781	17424734:18424734	AED	0.575256	0.00267319	0.00477075	1.89041e-07	0.0231562	0.00444457	8.93393e-05		0.00811398	0.0167954	0.00634399	0.0030642	0.0193876	0.00654676	0.0418053		0.00777462	0.00381292	0.0414477	0.0219672	0.00367722	2.31685e-09	LCORL	LAP3, LCORL, DCAF16
13	q12.2	rs12872889	28174628:29174628	SSE	0.642205	0.00193874	0.00417275	2.17209e-08	0.0216351	0.00386483	0.000173818	AED	0.673532	0.00274453	0.00651429	0.00346632	0.0195934	0.0067027	0.0142427		0.00217317	0.00351371	0.536256	0.0211257	0.00334812	2.79551e-10	FLT3	PAN3, FLT3, PAN3-AS1
6	q24.1	rs9389985	142153898:143153898	AED	0.64471	-0.00171241	0.00371356	0.0149515	-0.00838277	0.00344464	0.0186661		0.257991	0.00654731	0.00578808	0.0258129	0.0132837	0.00595925	0.00637868		0.000696136	0.00312557	0.823751	-0.00295655	0.00298226	0.321501	GPR126	ADGRG6
6	p21.31	rs542403917	33908986:34908986	AED	0.686568	0.00481061	0.0119217	5.55557e-06	0.0504923	0.0111149	0.00506809		0.00616592	0.0214983	0.00784897	0.95461	-0.000461755	0.00811254	0.0258617		0.0164522	0.00655571	0.0120871	0.0172482	0.00655277	0.00848341	RPS10, PACSIN1
6	p21.32	rs17843560	32109388:33109388	CED	0.688061	0.00370676	0.00923255	0.0013192	0.0274358	0.00854215	0.0102244		0.0543254	0.0212482	0.011042	0.630433	-0.0054807	0.0113915	0.0460143		0.0109243	0.00708289	0.122988	0.0155885	0.00683414	0.0225502	HLA-DQA1	HLA-DQA1
2	q31.1	rs79869125	175922238:176922238	CED	0.697169	0.00182355	0.00468605	3.99142e-07	0.0221178	0.00436289	0.00150117		0.184713	-0.0117347	0.00884693	0.000101066	-0.0354756	0.00912345	0.00150158		-0.00114696	0.00414101	0.781798	0.0113986	0.003936	0.00377977	AC096649.3, EXTL2P1
20	q11.22	rs6087571	32412091:33412091	AED	0.754241	0.00114441	0.00365567	0.000304223	0.0122434	0.00338989	0.0158175		0.0141925	-0.0571777	0.0233142	0.759487	-0.00745837	0.0243613	0.0155647		-0.000255105	0.00361154	0.943687	0.0118692	0.00335754	0.000407656	AHCY, CTD-3216D2.4	TRPC4AP, EIF2S2, MAP1LC3A, PIGU, GGT7, TP53INP2, ITCH, MYH7B
6	q23.1	rs9375702	129884187:130884187	AED	0.759049	0.00108651	0.00354223	0.00258688	0.00993033	0.0032958	0.0455064		0.0105542	0.01571	0.00614325	0.397752	-0.00530292	0.00627081	0.00834033		0.00473531	0.00306865	0.122801	0.00663319	0.0029174	0.0229861	L3MBTL3	SAMD3, L3MBTL3
14	q32.33	rs3212076	103670796:104670796	SSE	0.775337	-0.00106158	0.00371961	7.0942e-11	0.0224825	0.00344876	2.87667e-06	CED	0.0440168	0.0120653	0.00599068	0.000151372	0.0234587	0.006191	0.00795672		0.00259094	0.00316003	0.412268	0.0227137	0.00301283	4.73652e-14	XRCC3	EIF5, AL049840.1, ZFYVE21, TRMT61A, KIF26A, APOPT1, PPP1R13B, TDRD9, XRCC3, CKB, AL049840.4, AL139300.1, KLC1, BAG5
11	p15.4	rs11041939	7991223:8991223	AED	0.792214	0.00203973	0.00774274	1.75972e-06	-0.0344753	0.00721335	0.000559308		0.000405224	0.0202334	0.00572047	0.341038	0.00560895	0.00589097	0.0157223		0.0138091	0.00460095	0.00268783	-0.010429	0.00456272	0.0222723	STK33	LMO1, TRIM66, STK33
9	p22.3	rs7040652	14066406:15066406	SSE	0.814061	-0.000950784	0.0040426	1.03866e-05	-0.0165643	0.00375685	5.87955e-05		0.00389718	-0.0395401	0.0136979	0.538364	0.00850258	0.0138187	0.00677217		-0.00404258	0.00387727	0.297117	-0.0148391	0.00362526	4.25385e-05	RP11-408A13.2, RP11-408A13.3	ZDHHC21
13	q14.2	rs809845	50224055:51224055	AED	0.831262	0.00074282	0.00348606	2.69968e-05	-0.0136074	0.00324177	0.0025742		0.00484906	0.0155329	0.00551383	0.0543619	0.0109699	0.00570163	0.00386725		0.00496649	0.00294655	0.0918863	-0.00760325	0.00281811	0.00697584	DLEU1	EBPL, KCNRG, COBL, RCBTB1, DLEU1, DLEU2
4	q34.1	rs1491333	171686288:172686288	OED	0.843604	0.000791429	0.00401158	1.30066e-06	-0.0179841	0.00371587	0.000561773		0.0123824	0.0168117	0.00672145	0.502859	0.00464931	0.00693924	0.0685736		0.00499916	0.00344471	0.146708	-0.0129403	0.00327578	7.80489e-05	RP11-384D10.1, RP11-717H13.1
16	p11.2	rs143504748	29461344:30461344	SSE	0.92666	-0.000669711	0.00727571	6.24695e-09	0.0392227	0.00675058	5.83532e-05	SSE_Female	0.498896	0.0108652	0.0160671	0.000174843	0.061532	0.0163946	0.000472097	SSE	0.00129312	0.00662783	0.845311	0.0424568	0.00624213	1.0343e-11	TMEM219	MVP, YPEL3, INO80E, MAPK3
11	q23.3	rs8181524	115124979:116124979	AED	0.936819	-0.000504176	0.00636032	3.93204e-07	0.0301979	0.00595338	0.000424808		0.92839	0.000898706	0.00999994	0.00762673	0.0273924	0.0102659	0.0116184		-0.000100112	0.00536675	0.985117	0.0294918	0.00515004	1.02509e-08	LINC00900
15	q24.1	rs35364449	73778126:74778126	AED	0.958437	0.000240817	0.00462087	1.64122e-06	0.0204991	0.00427655	0.00127627		0.237879	0.00736937	0.0062435	0.0131532	0.0159572	0.00643514	0.0934302		0.00276365	0.00371426	0.456837	0.0191077	0.00356176	8.10932e-08	STOML1	PML, LOXL1-AS1, SCAMP2, STOML1, STRA6, LOXL1
12	q14.1	rs1031582	61763645:62763645	CED	0.988656	-6.02432e-05	0.00423698	1.30498e-07	0.0206375	0.00390985	0.000330625		0.00997313	0.0138599	0.0053785	0.729364	0.00190464	0.00550516	0.0300365		0.00527024	0.0033283	0.113316	0.0143566	0.0031877	6.67618e-06	FAM19A2	FAM19A2
5	q23.3	rs200148803	129943182:130943182	AED	0.998052	2.06884e-05	0.00847172	1.41428e-05	-0.034225	0.00788278	0.00178255		0.000467819	-0.0222749	0.00636629	0.707546	-0.00246622	0.00657384	0.00871285		-0.0142283	0.00508943	0.00517944	-0.0154935	0.00504863	0.00214889	RP11-114H7.3, HINT1

## Sheet: 23128_irnt
CHR	Band	locus	Range	Type	p_male	beta_male	se_male	p_female	beta_female	se_female	Min P_diff	Type (Rep)	p_male (Rep)	beta_male (Rep)	se_male (Rep)	p_female (Rep)	beta_female (Rep)	se_female (Rep)	Min p_diff (Rep)	Type (Final)	beta_male (Meta)	se_male (Meta)	p_male (Meta)	beta_female (Meta)	se_female (Meta)	p_female (Meta)	Genes	QTL Genes
16	q12.2	rs62048402	53303223:54303223	CED	4.70388e-77	0.0656151	0.00352971	1.59263e-57	0.052587	0.0032884	0.00127243	CED	1.06329e-27	0.0832843	0.00762866	1.08172e-10	0.045846	0.00710052	8.24969e-25		0.0687308	0.00320343	4.06754e-102	0.0513965	0.00298393	1.74185e-66	FTO
6	p12.3	rs3798519	50288778:51288778	CED	1.10601e-22	0.0443405	0.00452304	3.29199e-08	0.02327	0.00421147	0.000176934	AED	0.01492	0.0412753	0.0169547	0.000409033	0.0556608	0.015748	0.00287782		0.0441369	0.0043702	5.55285e-24	0.0254319	0.0040685	4.07997e-10	TFAP2B	TFAP2B
18	q21.32	rs2168711	57348531:58348531	CED	3.54547e-22	0.0396562	0.00409466	3.53326e-41	0.0511277	0.00380329	0.00482641	CED	2.43527e-05	0.038814	0.00919474	8.06776e-13	0.0600798	0.00838839	0.00784061		0.0395168	0.00374052	4.35193e-26	0.0526542	0.00346388	3.4869e-52	RNU4-17P, RP11-795H16.2
16	p11.2	rs27741	28004181:29004181	CED	7.64593e-22	0.0339171	0.00353084	1.79894e-25	0.0342706	0.00328513	0.0227993	AED	9.34563e-10	0.0474535	0.00775131	0.000989197	0.0235354	0.00714534	0.0113121		0.0362432	0.00321318	1.65642e-29	0.0323974	0.00298478	1.90506e-27	CLN3	EIF3C, SH2B1, APOBR, NUPR1, SPNS1, AC145285.2, ATP2A1, NPIPB7, CLN3, P8, TUFM, AC138894.3, ATXN2L, XPO6, NPIPB15, RRN3P2, NPIPB8, SGF29, AC145285.5, SULT1A2, EIF3CL, IL27, SBK1, CDC37P1, NPIPB6, ATP2A1-AS1, SULT1A1
6	p22.2	rs62396185	25680634:26680634	CED	1.05874e-21	-0.0380438	0.00397434	5.28052e-36	-0.0462336	0.00368981	0.0257733	AED	0.000143454	-0.0323839	0.0085163	1.09342e-09	-0.0479853	0.00787092	8.80937e-10		-0.0370316	0.00360147	8.46299e-25	-0.0465492	0.00334092	3.98949e-44	HIST1H2BD, HIST1H2BE	HIST1H3B, BTN1A1, HIST1H4H, HIST1H2BF, TRIM38, BTN3A2, BTN2A2, HIST1H2BK, HIST1H4E, HIST1H2AE, SLC17A3, HIST1H2BD, HIST1H3D, B4GAT1
18	q21.32	rs139806266	57587882:58587882	CED	1.30055e-21	-0.117616	0.0123144	3.8899e-18	-0.0997184	0.0114845	0.287831	CED	0.27887	-0.0212944	0.0196646	1.83977e-05	-0.0793641	0.0185257	0.0112989		-0.0904833	0.0104369	4.33659e-18	-0.0940677	0.00976105	5.57649e-22	MC4R, RP11-325K19.3
12	q13.12	rs7132908	49763148:50763148	CED	1.72877e-20	0.0330148	0.00355797	1.16897e-13	0.0246661	0.00332391	0.0178718	CED	2.32287e-06	0.0370058	0.00783369	1.34266e-09	0.0436697	0.00720197	0.165848		0.0336973	0.00323949	2.42704e-25	0.0280032	0.00301799	1.71457e-20	FAIM2	ARF3
11	p11.2	rs12798028	47104639:48104639	AED	3.10245e-20	0.0323716	0.00351233	5.05326e-09	0.0191576	0.00327722	1.93246e-06		0.115185	-0.0129582	0.00822559	8.0501e-05	-0.0299429	0.00759338	0.0550193		0.0253812	0.00323018	3.91778e-15	0.0114478	0.00300894	0.00014204	NDUFS3	RAPSN, NUP160, MYBPC3, ACP2, NR1H3, PSMC3, FAM180B, MADD, MTCH2, FNBP4, C1QTNF4, DDB2, SPI1, AC090559.1, PTPMT1, CELF1
2	p25.3	rs62106258	0:917167	CED	6.27778e-19	-0.0720946	0.00811137	6.23981e-29	-0.083651	0.00749287	0.00621017	AED	0.00151607	-0.0589507	0.0185855	3.67515e-11	-0.112246	0.0169596	0.0170784		-0.0699916	0.00743419	4.73908e-21	-0.088321	0.00685376	5.36245e-38	AC105393.1, AC105393.2	SH3YL1
2	p23.3	rs4430895	24661386:25661386	CED	7.50689e-19	0.0308751	0.00348156	5.12091e-07	0.0163221	0.00325018	2.78459e-06		0.00490879	-0.0216201	0.00768537	0.450059	-0.00539692	0.00714517	0.0227507		0.0219365	0.00317133	4.60903e-12	0.0125986	0.00295848	2.05842e-05	ADCY3, DNAJC27	ADCY3, DNAJC27-AS1, CENPO, DNAJC27, POMC
2	p25.3	rs6751993	135864:1135864	CED	3.08137e-18	0.0398935	0.00458049	1.11132e-27	0.0465512	0.00426879	0.0411115		5.82395e-12	-0.0703081	0.0102096	1.32058e-07	-0.0494206	0.00936546	3.20545e-05		0.0214285	0.00417916	2.93671e-07	0.0300424	0.00388432	1.04005e-14	AC093326.3, TMEM18	CHD3, SH3YL1
4	p12	rs10938398	44686139:45686139	CED	1.76363e-17	0.0297988	0.00350189	5.36317e-15	0.0255349	0.00326587	0.0388679	AED	0.000987726	0.0253511	0.00769546	2.38406e-05	0.0298234	0.00705716	0.0321205		0.0290358	0.00318739	8.26939e-20	0.0262913	0.00296388	7.27722e-19	RP11-362I1.1, PRKRIRP9
6	p21.31	rs2814994	34120153:35120153	CED	2.75626e-17	0.0422297	0.00499322	2.85311e-35	0.0578224	0.0046648	0.00437702	CED	0.0044195	0.0372082	0.0130704	1.81682e-05	0.0517158	0.012064	0.0140598		0.0415902	0.00466444	4.81505e-19	0.0570281	0.00435087	2.99046e-39	C6orf106	UHRF1BP1, PACSIN1, SNRPC, C6orf106
1	p31.1	rs2815748	72316147:73316147	SSE	4.26677e-17	-0.0368512	0.00438379	5.33841e-06	-0.0185634	0.00407883	0.000242392	AED	0.00112119	-0.0255881	0.00785274	0.456938	-0.00538635	0.00724063	0.00149745		-0.0341751	0.00382774	4.32662e-19	-0.0153892	0.00355375	1.48843e-05	RPL31P12, RNU6-1246P	RPL31P12, NEGR1
1	q21.2	rs11205303	149406413:150406413	CED	2.17908e-16	0.0289775	0.00352839	1.96784e-21	0.031194	0.00328087	0.157163	AED	0.000135881	0.0296275	0.00776403	1.86922e-06	0.0340413	0.00713991	0.100588		0.0290888	0.00321224	1.35815e-19	0.0316904	0.00298119	2.15859e-26	MTMR11	SV2A
19	p13.11	rs11668601	17714521:18714521	CED	2.56477e-15	0.0315198	0.00398419	2.38666e-07	0.0191586	0.00370819	0.00585814	CED	0.169435	0.0115765	0.00842508	2.89532e-05	0.0325223	0.00777672	0.0151523		0.027875	0.00360176	9.99971e-15	0.0216342	0.00334714	1.02319e-10	MAST3	PDE4C, MPV17L2, MAST3, IQCN, RAB3A, IL12RB1, IFI30
15	q23	rs58648944	67465102:68465102	CED	3.1272e-15	0.0279249	0.00354086	5.26434e-06	0.0150297	0.00330026	0.00199575		0.0262854	-0.0204567	0.00920615	1.06016e-06	-0.0411431	0.00842949	0.0163961		0.0216901	0.00330484	5.26955e-11	0.00756377	0.00307313	0.0138449	MAP2K5
12	p13.32	rs76895963	3884844:4884844	CED	3.41525e-15	0.10507	0.0133414	2.53113e-07	0.0639665	0.0124073	0.0240661	AED	0.00266589	0.0977442	0.0325371	0.439321	0.0229909	0.029729	0.0449331		0.104016	0.012344	3.5643e-17	0.0578882	0.0114501	4.28863e-07	CCND2	CCND2
1	q25.2	rs543874	177389480:178389480	CED	3.54981e-15	0.033579	0.00426636	4.17882e-34	0.0484408	0.00397764	0.000766433	CED	0.00999187	0.0242675	0.00941966	2.36712e-13	0.0636217	0.00868126	0.00106257		0.031994	0.00388633	1.83415e-16	0.0510748	0.00361613	2.69608e-45	RP11-63B19.1, SEC16B
11	p14.1	rs11030119	27228102:28228102	CED	1.21952e-14	0.0289832	0.00375688	9.55111e-19	0.0308875	0.00349361	0.225306	AED	0.00118891	0.0265371	0.0081859	0.012154	0.0188658	0.00752301	0.054237		0.0285576	0.00341446	6.07611e-17	0.0287548	0.00316861	1.13771e-19	RP11-587D21.4	BDNF, LIN7C
2	p16.1	rs6545714	58807725:59807725	CED	1.27448e-14	-0.0273261	0.00354467	1.33957e-06	-0.0159638	0.00330243	0.00448136	AED	0.000332191	0.0299343	0.00834014	0.0305945	0.0166444	0.00769726	0.000318546		-0.0185653	0.00326225	1.26337e-08	-0.0108946	0.0030349	0.000330978	LINC01122, AC007131.1
12	q24.31	rs147730268	122524476:123524476	CED	6.99667e-14	-0.045129	0.00602637	3.61648e-15	-0.0439262	0.00558275	0.146207	CED	0.13387	-0.0130658	0.00871602	9.46378e-09	-0.0459936	0.00801109	0.00270582		-0.0347587	0.00495691	2.34654e-12	-0.044602	0.00458028	2.07918e-22	KNTC1	RSRC2, HCAR1, HCAR3
22	q13.1	rs2267372	38098234:39098234	CED	7.01024e-14	-0.0263874	0.0035238	3.09455e-08	-0.018275	0.00330099	0.0349859	CED	0.00020481	0.028565	0.00769236	0.280416	0.00766675	0.00710279	0.0109997		-0.0168559	0.00320366	1.42909e-07	-0.0136671	0.0029935	4.98069e-06	MAFF	NOL12, BAIAP2L2, CPAMD8, MAFF, PLA2G6, ANKRD54, TMEM184B, CSNK1E, TDRKH
5	q14.3	rs34483452	87486314:88486314	CED	1.43849e-13	0.0376619	0.00509402	5.97287e-08	0.02578	0.00475662	0.00423409	CED	0.000249629	0.038228	0.0104361	7.77392e-05	0.0379887	0.00961336	0.081674		0.0377708	0.00457778	1.57211e-16	0.0281811	0.00426329	3.83878e-11	CTC-467M3.1	MEF2C
6	p12.3	rs2817419	50312906:51312906	CED	5.6387e-13	0.0283588	0.00393351	3.81885e-09	0.0216785	0.00367922	0.00533786	SSE_Male	5.40025e-05	-0.0570033	0.0141163	0.129726	-0.0196625	0.0129767	0.0153937		0.0222083	0.00378915	4.60009e-09	0.0186025	0.0035397	1.47707e-07	TFAP2B	TFAP2B
14	q31.1	rs28479795	79443606:80443606	CED	7.4274e-13	0.0303252	0.00422834	1.45411e-10	0.0251487	0.00392307	0.014802	CED	3.10234e-05	0.0379739	0.00911431	0.00522898	0.0234909	0.00841148	0.013798		0.0316798	0.00383567	1.46573e-16	0.0248525	0.00355539	2.747e-12	NRXN3	NRXN3
11	p14.1	rs6265	27179916:28179916	CED	1.23036e-12	0.0264513	0.00372424	1.7535e-18	0.0303768	0.00346253	0.0181852	SSE_Male	7.83445e-05	-0.0377756	0.00956366	0.16518	-0.0123175	0.00887499	0.0071371		0.0179941	0.00347039	2.15967e-07	0.0247367	0.00322572	1.73929e-14	BDNF	BDNF-AS, LGR4, BDNF
16	p11.2	rs11642933	29446708:30446708	CED	1.33072e-12	0.0246577	0.00347702	1.56277e-15	0.0258308	0.00323997	0.0776525	CED	0.303882	-0.00783592	0.0076213	0.000134497	-0.0267574	0.00700742	0.0243074		0.0190596	0.00316336	1.68975e-09	0.0165686	0.00294084	1.76106e-08	CTD-2574D22.2, TMEM219	HIRIP3, BOLA2B, C16orf92, PPP4C, SMG1P6, SMG1P2, INO80E, FAM57B, NPIPB3, DOC2A, YPEL3, TBX6, KCTD13, SMG1P5, SLAMF1, BOLA2-SMG1P6, ZNF212, CORO1A, GDPD3, MAPK3, PRDM8
4	q24	rs13107325	102688709:103688709	CED	1.62043e-12	0.0463078	0.00655517	3.26391e-08	0.0341152	0.0061726	0.00607503	AED	0.0220979	0.0344434	0.0150487	0.000144453	0.0528856	0.0139144	0.0144084		0.0444156	0.00600976	1.46186e-13	0.0372017	0.00564233	4.30121e-11	SLC39A8	SLC39A8
12	q24.31	rs58379261	121841560:122841560	SSE	2.09495e-12	-0.026723	0.00380207	0.0180804	-0.00833344	0.00352516	0.000371183	AED	0.00560687	-0.0254234	0.00917773	0.000230847	-0.0313513	0.00851255	0.140226		-0.0265326	0.00351258	4.23402e-14	-0.0117029	0.00325694	0.000326602	RP11-87C12.2	HPD, PSMD9, WDR66, MYOM2, LINC01089, BCL7A, MORN3, AC084018.1
2	q36.3	rs2943650	226605921:227605921	SSE	2.18927e-12	-0.0259542	0.00369592	0.00867072	-0.00901175	0.00343331	0.000716166	AED	1.46737e-07	0.0561815	0.0106855	0.805618	0.002433	0.00988681	0.000111213		-0.0171779	0.00349289	8.74471e-07	-0.00778014	0.00324332	0.0164479	AC068138.1, MIR5702	IRS1
19	q13.32	rs10423928	45682304:46682304	CED	2.28994e-12	-0.0307115	0.00437727	5.86482e-13	-0.0293662	0.00407632	0.35957	AED	0.0143975	-0.0243886	0.0099654	0.00484884	-0.0257891	0.00915461	0.0477083		-0.0296889	0.00400769	1.28246e-13	-0.0287743	0.00372384	1.10061e-14	GIPR	SNRPD2, VASP, GIPR
6	p21.31	rs11755266	34662141:35662141	CED	2.34836e-12	0.0413193	0.00589215	3.23064e-20	0.0507611	0.0055103	0.00537793	CED	0.0194081	0.0305784	0.0130805	0.000263827	0.0439014	0.0120319	0.152906		0.0395075	0.00537227	1.92399e-13	0.0495718	0.0050099	4.38643e-23	TCP11, SCUBE3	UHRF1BP1, PACSIN1, DEF6, SNRPC, TULP1, RPL10A, C6orf106
11	p11.2	rs60572790	43192383:44192383	CED	2.49945e-12	-0.0258116	0.00368534	9.55834e-10	-0.0210327	0.00343844	0.0101648		0.329832	0.00762279	0.00782252	0.00103987	0.0235574	0.00718269	0.0117792		-0.0197386	0.00333388	3.20736e-09	-0.0127193	0.00310139	4.11061e-05	HSD17B12	AC087521.2, HSD17B12
1	q25.2	rs490544	177391097:178391097	SSE	3.62946e-12	0.0281206	0.00404529	9.30543e-07	0.0184603	0.00376285	0.00419672		0.955377	-0.00045749	0.0081759	0.00345791	-0.0220258	0.00753284	0.00657914		0.0225003	0.00362575	5.44562e-10	0.0103754	0.00336623	0.00205486	RP11-63B19.1, SEC16B
7	p22.2	rs1182199	2362542:3362542	CED	3.74898e-12	-0.026117	0.00375954	1.0773e-16	-0.0290907	0.00350629	0.269076	CED	0.102774	-0.0139445	0.00854652	9.74268e-05	-0.0306465	0.00786354	0.0242525		-0.0241435	0.0034413	2.28649e-12	-0.0293487	0.00320237	4.96843e-20	GNA12	GNA12, AC006028.1, PFDN4, AMZ1
1	p31.1	rs34517439	77950517:78950517	CED	3.838e-12	0.0371036	0.00534362	7.63435e-22	0.0474242	0.00493698	0.00752849	CED	0.00619285	0.0319744	0.0116799	6.18473e-12	0.0741459	0.0107812	0.00121214		0.0362158	0.00485922	9.12326e-14	0.0520563	0.00448873	4.26227e-31	GIPC2	FUBP1, PIGK
18	q21.32	rs73455626	57442192:58442192	CED	6.0092e-12	0.025989	0.0037775	7.59076e-22	0.0337509	0.00351333	0.0133234	CED	0.00388509	0.0264111	0.00914654	1.0955e-06	0.0409519	0.00840143	0.0311218		0.0260505	0.00349145	8.5725e-14	0.0348227	0.00324133	6.36829e-27	RP11-795H16.2, RP11-396N11.1	AC090621.1
6	q16.1	rs9320823	97929337:98929337	CED	6.61781e-12	0.0243262	0.0035429	1.53469e-07	0.0173201	0.00329997	0.0331437	CED	2.84233e-05	-0.0319524	0.00763255	1.61835e-05	-0.0302729	0.00701992	0.0678354		0.0143497	0.00321357	7.99408e-06	0.0087064	0.00298645	0.00355347	RP11-436D23.1
7	q11.23	rs28888492	76195502:77195502	SSE	6.68985e-12	0.0349097	0.00508544	0.00625639	0.0128572	0.0047026	9.08388e-05		0.745084	-0.00267759	0.00823542	0.00220872	-0.0231538	0.00756457	0.00239357		0.0245336	0.00432695	1.42834e-08	0.00281949	0.00399378	0.480206	RP11-467H10.2	DTX2P1, PMS2P9, PMS2P3, UPK3BP1, POMZP3
3	p12.1	rs62261725	85398626:86398626	CED	1.00961e-11	-0.025189	0.00370121	1.17841e-05	-0.015064	0.00343796	0.00261999		4.16685e-05	0.0383993	0.00936892	0.661812	0.003762	0.00860049	0.000629852		-0.0166047	0.00344233	1.40925e-06	-0.0124702	0.00319235	9.37279e-05	CADM2	CADM2
3	q23	rs724016	140605570:141605570	CED	1.14388e-11	0.0236076	0.00347805	1.82785e-24	0.0331445	0.0032465	0.00551465	SSE_Female	0.0806068	0.0134236	0.00768279	5.6137e-08	0.0382627	0.00704436	0.00389943		0.0218755	0.00316849	5.05374e-12	0.0340411	0.00294845	7.7827e-31	ZBTB38	ALPL, CD93, ZBTB38, VIL1, HEXIM2, PTPRN2, HCG11, KRT23, RAD51B, SPDYC, FBXL13
17	q24.2	rs55931203	65354602:66354602	CED	2.21156e-11	0.0292939	0.00437759	4.86214e-15	0.0319025	0.00407384	0.0813301		0.000526256	0.0310471	0.00895408	0.0589831	0.0155917	0.00825671	0.0466383		0.0296321	0.00393275	4.89455e-14	0.0287092	0.00365335	3.89345e-15	BPTF	SH3GL1P3, BPTF, LRRC37A16P, SMURF2, LINC00674, AC145343.1
5	q13.3	rs2307111	74503678:75503678	CED	2.4589e-11	0.024345	0.0036465	2.84554e-17	0.0286926	0.00339415	0.0179111	SSE_Female	0.143216	-0.0116005	0.00792411	4.25276e-09	-0.0431144	0.00733825	0.000253967		0.0180633	0.00331259	4.95479e-08	0.016038	0.00308059	1.92809e-07	POC5	POC5, COL4A3BP, HMGCR, ANKDD1B
4	q22.1	rs6814344	89233882:90233882	SSE	3.05408e-11	-0.023124	0.00348022	0.0406116	-0.00663063	0.00323842	0.000521505		0.422221	0.00853712	0.010637	0.0377767	0.0203543	0.00979825	0.206931		-0.0200625	0.00330768	1.31605e-09	-0.00397317	0.00307483	0.196302	FAM13A	FAM13A
1	p31.3	rs12140153	62079891:63079891	CED	4.11861e-11	-0.0396486	0.00600719	3.00366e-07	-0.0288427	0.0056296	0.120101	AED	0.000451633	-0.0272837	0.00777694	1.44268e-06	-0.0345223	0.0071627	0.0849987		-0.0350279	0.00475407	1.73217e-13	-0.0310115	0.00442613	2.44434e-12	INADL	L1TD1
3	p25.2	rs6809832	11914420:12914420	CED	4.26083e-11	-0.0322894	0.00489592	9.1664e-06	-0.0201914	0.00455164	0.0113092		0.335683	-0.00737184	0.00765711	0.000561479	-0.0243562	0.0070601	0.0121733		-0.0250586	0.00412483	1.23936e-09	-0.0214142	0.00382553	2.17209e-08	PPARG	SYN2, PPARG, TSEN2
2	p13.3	rs4410328	69100683:70100683	CED	4.88781e-11	-0.0232232	0.00353218	0.000975593	-0.0108247	0.00328269	0.00526705	CED	8.05495e-08	-0.0424362	0.00790663	0.0642902	-0.0134782	0.00728469	0.00353482		-0.0264197	0.003225	2.56594e-16	-0.0112726	0.00299285	0.000165549	GFPT1	NFU1, GFPT1, SNRNP27
16	p13.3	rs879620	3515729:4515729	CED	5.66329e-11	0.023412	0.00357282	4.90123e-17	0.0279371	0.00332988	0.0783849	CED	0.0452568	-0.0193556	0.00966653	2.90377e-05	-0.0371277	0.00887937	0.0271993		0.0182717	0.00335124	4.97407e-08	0.0199149	0.00311785	1.68743e-10	ADCY9	HOMER1, ADCY9
3	p24.2	rs13067187	24577932:25577932	SSE	5.79154e-11	-0.0330736	0.00504982	0.00405866	-0.0134601	0.00468405	0.000922205		9.40991e-05	-0.0334565	0.00856581	0.695739	-0.00307729	0.00786867	0.00146024		-0.0331724	0.00435015	2.42951e-14	-0.0107435	0.0040249	0.00760175	AC133680.1
3	q22.1	rs12498044	131095531:132095531	CED	8.54086e-11	0.0251387	0.00387275	3.00715e-05	0.0150141	0.0035979	0.0199197	CED	0.00125738	0.0275596	0.00854345	0.000222617	0.0290062	0.00785609	0.0375755		0.0255514	0.00352727	4.3584e-13	0.01744	0.00327117	9.74397e-08	CPNE4	CPNE4
1	q41	rs10495121	219137686:220137686	CED	8.55786e-11	0.0248459	0.00382782	7.08469e-14	0.026689	0.00356478	0.134542	CED	0.000838079	0.0277649	0.00831231	1.6886e-05	0.0329866	0.00766589	0.0116239		0.0253566	0.00347688	3.03298e-13	0.0278087	0.00323238	7.75545e-18	RP11-95P13.1, RP11-95P13.2	LYPLAL1, LYPLAL1-AS1
1	q32.1	rs2678204	201300511:202300511	CED	9.38837e-11	0.0236872	0.00365718	5.80105e-09	0.0198048	0.00340134	0.0542881		0.663919	-0.00347758	0.00800339	0.00983349	-0.0189568	0.00734263	0.0310813		0.0189948	0.00332635	1.12706e-08	0.0129567	0.00308629	2.69109e-05	IPO9	SHISA4, LMOD1, RNPEP, IPO9, AL513217.1
7	p14.3	rs1653892	31899469:32899469	SSE	1.00724e-10	0.0358725	0.00554763	0.251991	0.00594999	0.00519409	8.23862e-05		0.000807132	0.0457089	0.0136418	0.192815	0.0162443	0.0124734	0.0518218		0.0372684	0.00513895	4.10258e-13	0.00747124	0.00479498	0.1192	PDE1C, AC018641.7	PPP1R17, PDE1C
11	q13.2	rs4930349	65519936:66519936	CED	1.01224e-10	-0.0233688	0.00361436	1.16836e-07	-0.0177541	0.00335072	0.0520446		2.89867e-05	-0.0519206	0.0124156	0.00107477	-0.0369511	0.0112986	0.0205502		-0.0255995	0.0034703	1.6223e-13	-0.019306	0.00321243	1.85795e-09	RP11-755F10.1, KLC2	SLC29A2, EFEMP2, KDELC2, SNX32, PACS1, RAB1B, SF3B2, LARP1B, BANF1, GAL3ST3, CTSW
3	p21.31	rs9843653	49420571:50420571	CED	1.12908e-10	0.0223604	0.00346728	2.44069e-16	0.0264708	0.00322858	0.0972729	CED	0.0135821	0.0192907	0.00781551	1.19108e-06	0.0349106	0.00718645	0.0063758		0.0218556	0.00316938	5.35457e-12	0.0278882	0.00294503	2.80976e-21	ACTBP13, MST1R	APEH, ACTBP13, GMPPB, SLC38A3, RNF123, CRBN, MST1R, INKA1, IP6K1, HYAL3, USP4, GPX1, RBM5, DCUN1D1, MAPKAPK3, RBM6, CAMKV, MON1A, WDR6, HEMK1, ROR2, P4HTM, KLHDC8B, WDR53, UBA7, MAP3K13
16	q12.2	rs9302652	53365975:54365975	AED	1.19208e-10	-0.0251816	0.00390973	3.52477e-05	-0.0151218	0.00365552	0.06018	AED	0.000516732	0.0301269	0.00867639	0.0256508	0.0179277	0.0080338	0.0283331		-0.0158464	0.00356454	8.76569e-06	-0.0094529	0.00332727	0.00449673	FTO	FTO
5	q14.1	rs41132	76908842:77908842	AED	1.44316e-10	-0.0260779	0.00406725	4.2612e-08	-0.0207611	0.00378859	0.00503296		0.0239727	-0.0177491	0.00786167	0.0299853	-0.0157992	0.00727953	0.0620037		-0.0243194	0.00361244	1.67218e-11	-0.0197036	0.00336069	4.54712e-09	AP3B1	AP3B1
6	p22.2	rs9467869	26239193:27239193	CED	1.76289e-10	-0.0300606	0.00471088	2.48168e-11	-0.0292352	0.00437991	0.0246513		0.134075	-0.0199813	0.0133363	0.000798783	-0.0414036	0.0123465	0.112771		-0.0289425	0.0044419	7.23123e-11	-0.0305954	0.00412787	1.2449e-13	RP11-457M11.5, GUSBP2
1	p31.3	rs2481665	62094677:63094677	CED	2.20988e-10	-0.0221136	0.00348444	6.12674e-06	-0.0146722	0.00324456	0.00941055	CED	0.000642229	-0.0261088	0.00764878	2.6989e-06	-0.0330097	0.0070336	0.0137728		-0.0228002	0.00317091	6.45846e-13	-0.0178896	0.0029462	1.26248e-09	INADL	PATJ, L1TD1
5	q14.3	rs7721843	86602792:87602792	SSE	2.27524e-10	-0.0301687	0.00475704	0.188539	-0.00586741	0.00446218	0.00019464		0.0811716	0.0235022	0.0134762	0.791635	0.00327999	0.0124153	0.120874		-0.024222	0.00448577	6.67364e-08	-0.00482097	0.0041992	0.25094	CTD-2316B1.2, TMEM161B
13	q14.11	rs75983170	40288838:41288838	SSE	3.15677e-10	0.0232851	0.00370118	0.0149861	0.00837424	0.00344231	0.00298915		0.000108239	0.052819	0.0136419	0.28343	0.0135713	0.012652	0.0174534		0.02531	0.00357205	1.38467e-12	0.00873244	0.00332156	0.00856328	LINC00332, RPL17P51
18	q11.2	rs1788808	20590023:21590023	CED	3.23806e-10	-0.0221984	0.00353066	7.71082e-14	-0.0244899	0.00327592	0.0133725	CED	9.15878e-09	-0.043924	0.00764281	0.00386658	-0.0202201	0.00699897	1.01044e-08		-0.0260194	0.00320518	4.7433e-16	-0.0237226	0.002967	1.29073e-15	NPC1	NPC1, TMEM241, RMC1
11	q24.1	rs10892918	122236207:123236207	SSE	4.38441e-10	0.0242644	0.00388848	0.0028986	0.0107541	0.00361077	6.70733e-06		0.0038095	-0.0289542	0.0100058	0.872003	0.00149642	0.00928784	0.00150421		0.0172815	0.00362441	1.85973e-06	0.00953863	0.0033654	0.00459227	CRTAM	CRTAM, JHY
9	p22.3	rs10756713	15380555:16380555	CED	4.67549e-10	-0.0225197	0.00361471	1.14966e-12	-0.0239355	0.00336563	0.104587		0.0852485	-0.0133647	0.00776534	0.00140514	-0.0228977	0.00716941	0.014074		-0.0208893	0.00327706	1.83699e-10	-0.0237481	0.00304663	6.44705e-15	CCDC171	CCDC171
8	q21.11	rs2926614	75801610:76801610	CED	5.00818e-10	0.0280091	0.00450364	1.91166e-05	0.0179407	0.00419657	0.0211077		0.0224463	-0.018842	0.00825376	0.256646	-0.00860232	0.00758335	0.0854346		0.0172603	0.00395341	1.26578e-05	0.0117178	0.00367183	0.00141649	PKMP4, HNF4G
16	q22.3	rs7498798	72597029:73597029	SSE	5.7955e-10	-0.0224817	0.00362826	3.28361e-05	-0.0140278	0.0033778	0.0106596		0.469045	-0.00737039	0.0101795	0.00203851	-0.0288289	0.0093456	0.0494465		-0.0207783	0.00341766	1.20406e-09	-0.0157379	0.00317668	7.26258e-07	RP11-346C20.3, HCCAT5	ZFHX3
9	p21.1	rs1412234	27910683:28910683	CED	5.85864e-10	0.0228469	0.00368822	1.11239e-08	0.0196668	0.00344253	0.0610102	AED	0.126569	0.0117661	0.00770129	0.0001587	0.0267112	0.00707133	0.0566987		0.0207796	0.00332643	4.18887e-10	0.0210165	0.00309523	1.12164e-11	LINGO2
12	q24.31	rs76929617	120367798:121367798	CED	6.08154e-10	-0.0553694	0.0089469	2.94013e-16	-0.0677719	0.00828863	0.0107009		0.385553	-0.0343637	0.0396021	0.0051236	-0.0990395	0.03538	0.0679841		-0.0543493	0.00872696	4.73178e-10	-0.0693987	0.00807013	8.00923e-18	RP1-166H1.2, COX6A1	COQ5
9	p22.2	rs10810611	16256377:17256377	CED	6.64142e-10	-0.022598	0.00365973	1.84475e-05	-0.0145558	0.00339849	0.00111907		0.99081	-0.000106017	0.0092038	0.000247203	0.0310518	0.00847147	0.00571642		-0.0195273	0.00340074	9.35313e-09	-0.00823338	0.00315415	0.00904532	BNC2
4	q28.3	rs4241964	136553959:137553959	CED	6.73143e-10	0.0215156	0.00348564	0.000166658	0.0122314	0.00324878	0.0513603		0.0230517	0.0270212	0.0118895	0.471057	0.00779739	0.0108182	0.00797898		0.0219513	0.00334486	5.28385e-11	0.0118646	0.0031115	0.000137212	RP11-775H9.1
12	q24.31	rs3897102	122992112:123992112	SSE	8.07563e-10	-0.0215895	0.00351403	0.00387917	-0.00943179	0.00326601	0.00169484		0.776658	0.00253707	0.00894346	0.00345701	0.0238112	0.00814325	0.0120927		-0.0183629	0.00327062	1.97137e-08	-0.0048254	0.00303129	0.111416	PITPNM2	ABCB9, DENR, PITPNM2, ARL6IP4, OGFOD2, RILPL2, KMT5A, MPHOSPH9, C12orf65, CDK2AP1, SRSF6, HNRNPLL, DDX55, ALDH4A1, HNRNPH1
1	p13.3	rs17024393	109654688:110654688	CED	8.21293e-10	0.0675762	0.0110039	8.582e-08	0.0545276	0.0101832	0.0973656	SSE_Male	8.72759e-07	0.119344	0.0242604	0.513777	0.014384	0.0220285	0.000543081		0.0764092	0.0100212	2.44565e-14	0.0474595	0.00924334	2.82973e-07	GNAT2	GSTM1, GSTM4, GSTM2, KIAA1324, GSTM3, SORT1, AMIGO1, PSRC1
10	q23.2	rs10887578	87596047:88596047	AED	8.85497e-10	0.0213447	0.00348249	0.0180546	0.00767522	0.003246	0.00396526		0.19451	0.0105806	0.00815534	0.00273971	-0.0223408	0.00745761	0.00144581		0.0196846	0.00320271	7.93419e-10	0.00289438	0.00297629	0.330812	GRID1	GRID1
16	q22.1	rs11075747	69440361:70440361	CED	9.33062e-10	-0.0215644	0.00352313	9.99754e-06	-0.0145212	0.00328732	0.0078197		0.287952	0.0108223	0.0101843	0.00061966	0.0321366	0.0093881	0.00708889		-0.0181029	0.00332953	5.4168e-08	-0.00942527	0.00310261	0.00238272	WWP2	NPIPB14P, CLEC18C, MIR140, PDXDC2P, CLEC18A, WWP2, SF3B3
14	q13.1	rs17522122	32802882:33802882	CED	9.65092e-10	-0.0212952	0.0034822	1.19031e-05	-0.0142174	0.00324636	0.01678		0.0813392	0.0133565	0.00766287	0.000558492	0.024352	0.00705593	0.0551714		-0.0153643	0.00317022	1.25696e-06	-0.00747928	0.00294919	0.0112112	AKAP6, NPAS3
14	q23.2	rs79733879	62569469:63569469	SSE	9.67683e-10	0.0340437	0.00556723	0.168612	0.00713005	0.00517915	0.000292413		0.675337	-0.00521169	0.0124432	0.0328249	0.0243963	0.0114307	0.00642294		0.0274963	0.00508179	6.27594e-08	0.0100709	0.00471751	0.0327774	RP11-395B20.2, RP11-395B20.1
16	q12.2	rs73622719	53770077:54770077	SSE	1.09745e-09	0.0473374	0.00776671	0.0100393	0.0185367	0.00720011	0.0065395		0.786074	0.00438625	0.0161607	0.103254	0.0244087	0.014981	0.0365696		0.0392784	0.00700025	2.01162e-08	0.0196386	0.0064895	0.00247645	FTO, RP11-324D17.2
12	q24.31	rs825453	124008758:125008758	CED	1.52993e-09	-0.0213142	0.00352795	5.14379e-08	-0.0178838	0.00328355	0.0685898	AED	0.5192	-0.00500134	0.007759	0.00156068	-0.0226439	0.00715817	0.0424051		-0.0185194	0.00321155	8.09335e-09	-0.0187113	0.00298453	3.62379e-10	FAM101A
8	q21.11	rs2977324	76216737:77216737	CED	1.5781e-09	0.027143	0.00449646	2.34959e-05	0.0177165	0.0041894	0.0370382		0.000875392	-0.0257641	0.00774141	0.644396	-0.00329461	0.00713791	0.0149491		0.0137966	0.00388817	0.000387662	0.0123331	0.00361306	0.000641392	AC016194.1, snoU13
19	p13.3	rs57904377	3550832:4550832	SSE	1.67477e-09	-0.0268526	0.00445545	0.00628533	-0.0113582	0.00415663	0.00514405		0.729179	-0.00346611	0.0100113	0.0228356	-0.0209926	0.00922243	0.0510859		-0.0229864	0.00407054	1.63263e-08	-0.0129849	0.00378951	0.000611352	ZBTB7A	PIAS4, EEF2, ZBTB7A, MAP2K2
2	p23.3	rs2384463	26442256:27442256	CED	1.72615e-09	-0.0208753	0.0034665	0.000283908	-0.0117131	0.00322709	0.0442029	CED	0.568881	0.00506392	0.00888865	0.000267458	0.0302264	0.00829198	0.00747653		-0.0174509	0.00322959	6.53701e-08	-0.0061964	0.00300737	0.0393594	KCNK3	KHK, SLC35F6, MAPRE3, DPYSL5, ATRAID, KCNK3
5	q35.1	rs10038105	169854039:170854039	CED	1.91393e-09	0.0233627	0.00389035	1.23105e-06	0.0176105	0.00363048	0.0713942		0.380747	-0.00847712	0.00967119	0.0333771	-0.01887	0.00886922	0.105096		0.0189281	0.00360928	1.56877e-07	0.0123752	0.00335989	0.00023031	RANBP17	RANBP17, ZNF836, AC008514.2
9	q22.31	rs2482704	93682363:94682363	CED	2.09637e-09	-0.020982	0.00350254	0.0029833	-0.00968826	0.0032626	0.0183041		0.804456	0.00192082	0.00775817	0.0128884	-0.0178	0.00715738	0.0308595		-0.0171043	0.00319229	8.41472e-08	-0.0110838	0.00296872	0.000188811	NFIL3	NFIL3, AL353764.1
16	q12.2	rs6499640	53269677:54269677	CED	2.10922e-09	0.021258	0.00354922	3.39915e-12	0.0230318	0.00330888	0.00243286	AED	5.52118e-05	-0.0314895	0.00780811	2.20567e-05	-0.0305998	0.00721104	0.0269636		0.0122256	0.00323108	0.000154489	0.0137035	0.00300738	5.19831e-06	FTO	RBL2
14	q12	rs11624623	25448430:26448430	SSE	2.22371e-09	-0.0226351	0.00378457	0.00332231	-0.0103632	0.00352939	0.00309137		0.132114	-0.0128621	0.00854141	0.00176274	-0.0244811	0.00782706	0.0557627		-0.0210313	0.00346013	1.21551e-09	-0.0127487	0.00321742	7.41949e-05	RP11-388G3.1, SNORD37
3	q27.1	rs6797004	182863270:183863270	SSE	2.32812e-09	-0.0238618	0.00399466	0.00423273	-0.0105881	0.00370172	0.0132647		0.0180142	-0.238233	0.100714	0.375424	-0.0841665	0.0949565	0.0381071		-0.0241985	0.00399152	1.34039e-09	-0.0106997	0.00369891	0.00381976	KLHL24	YEATS2, KLHL24, KLHL6, ABCC5
15	q24.1	rs4776613	72580731:73580731	CED	2.50124e-09	0.0221277	0.00371165	0.000703269	0.0116891	0.0034498	0.0115723		0.138657	-0.0115426	0.00779457	0.000151518	-0.027085	0.00714848	0.00180965		0.0159041	0.00335111	2.07555e-06	0.00436463	0.00310693	0.160078	ADPGK-AS1	ADPGK, BBS4, MYO9A
6	p22.1	rs9257424	28435259:29435259	AED	2.54386e-09	0.0227858	0.0038238	2.10171e-07	0.0185221	0.0035686	0.0176045		0.00213804	-0.0260586	0.00848648	0.549775	-0.00466543	0.00780039	0.00311807		0.0145429	0.00348625	3.02588e-05	0.014509	0.00324512	7.78541e-06	C6orf100, KRT18P1	HLA-F, BTN3A2, HIST1H4L, ZSCAN9, TRIM27, HLA-G, ZNF311, IFITM4P
3	p25.2	rs7649970	11892272:12892272	CED	3.39542e-09	0.0312288	0.00528266	6.51785e-12	0.0339677	0.00494558	0.114414	CED	0.000313933	0.0428318	0.0118848	2.31489e-05	0.0463188	0.0109433	0.0167943		0.033143	0.00482728	6.61291e-12	0.0360624	0.00450672	1.22494e-15	PPARG	SYN2
3	q11.2	rs7621230	93507019:94507019	CED	3.57425e-09	0.0205764	0.00348569	1.21647e-05	0.0142261	0.00325189	0.0279044	SSE_Male	2.31273e-06	0.0360546	0.00763089	0.984819	-0.000134436	0.00706505	0.000250754		0.0232485	0.00317057	2.25776e-13	0.0117156	0.002954	7.30849e-05	NSUN3, ARMC10P1	ARMC10, STX19
7	p13	rs799449	44284697:45284697	SSE	4.13667e-09	0.0206069	0.0035052	0.0111956	0.00825521	0.00325449	0.00074598	AED	0.00382925	0.132193	0.0457084	0.965706	-0.00172804	0.0401915	0.0138936		0.0212593	0.00349494	1.18046e-09	0.00819018	0.00324387	0.0115759	OGDH, ZMIZ2	DDX56, ZMIZ2, H2AFV, TMED4, CCM2, PPIA
16	q12.2	rs79226694	53328899:54328899	CED	4.64767e-09	0.0638192	0.0108913	8.57817e-06	0.0452669	0.0101715	0.163674		0.103038	0.0448424	0.0275048	0.0790156	0.043689	0.0248732	0.118923		0.061247	0.0101263	1.46375e-09	0.0450408	0.00941472	1.71766e-06	FTO	RBL2
14	q21.3	rs35697587	46798505:47798505	CED	4.67788e-09	-0.0202972	0.00346453	0.00449985	-0.0091771	0.00323041	0.00562506	CED	0.000226279	0.0282671	0.00766435	0.139626	0.010426	0.00705786	0.0166163		-0.0120576	0.00315697	0.00013381	-0.0057817	0.00293735	0.0490291	RPL10L, MDGA2
11	p11.2	rs10838613	46211778:47211778	SSE	4.92961e-09	-0.0280143	0.00478889	0.589156	-0.00240428	0.00445188	1.97206e-05		0.047103	0.025326	0.0127558	0.79337	-0.00312059	0.0119134	0.0406826		-0.0214249	0.00448335	1.76362e-06	-0.00249205	0.00417022	0.550119	ARHGAP1	ATG13, CKAP5, C11orf49, NR1H3, ARFGAP2, MADD, HARBI1, C1QTNF4, DDB2, SPI1
1	p21.3	rs588660	96386604:97386604	CED	5.42852e-09	0.0206105	0.00353295	8.52443e-10	0.0201609	0.00328612	0.0459488	CED	0.000297278	-0.0280475	0.00775211	0.00910582	-0.0185752	0.00712189	0.0274084		0.0122423	0.00321483	0.00014005	0.0133616	0.00298381	7.53382e-06	UBE2WP1, EEF1A1P11
12	q24.31	rs6488898	123703832:124703832	CED	5.50448e-09	0.0386837	0.00663362	3.78741e-06	0.0283032	0.00612245	0.0197796		0.975437	0.000368286	0.0119612	0.0242407	-0.0247913	0.0110018	0.0399758		0.0296709	0.00580119	3.14363e-07	0.0157485	0.00534985	0.00324277	ATP6V0A2	TCTN2, HCAR3, RILPL2, DDX55
18	q21.32	rs17066856	57549656:58549656	AED	5.94238e-09	-0.0363435	0.006246	9.78257e-15	-0.0455374	0.00588136	0.00597913	SSE_Female	0.650825	0.00537771	0.0118813	0.000987072	-0.0364021	0.0110496	0.00194628		-0.0273099	0.0055286	7.82215e-07	-0.0435206	0.00519173	5.17318e-17	MC4R, RP11-325K19.3
16	q21	rs60262300	64047693:65047693	SSE	5.97723e-09	-0.0275137	0.00472931	0.0473304	-0.00869167	0.00438233	0.00177763		0.00290092	-0.0708251	0.0237806	0.528948	0.0137529	0.0218432	0.00440517		-0.0291615	0.00463847	3.23916e-10	-0.00782321	0.00429671	0.0686458	RP11-467L24.1
8	q13.3	rs7845090	72949940:73949940	CED	6.35568e-09	-0.0222998	0.00383987	4.27997e-14	-0.0269805	0.00357226	0.051554	CED	0.0331801	0.0174595	0.008197	0.000206917	0.0280607	0.00756201	0.0219245		-0.015145	0.00347725	1.32798e-05	-0.0169386	0.00323	1.57006e-07	KCNB2
7	q11.23	rs236660	74550086:75550086	CED	6.82739e-09	0.0204698	0.00353206	3.52191e-08	0.0181123	0.00328507	0.112537		0.561579	0.00534633	0.00920983	0.00555296	0.0234966	0.00847269	0.0366637		0.0185307	0.00329785	1.9206e-08	0.0188159	0.0030629	8.08896e-10	POM121C	NCF1, HIP1, STAG3L3, POM121C, PMS2P3, GTF2I, PMS2P6, STAG3L1
5	q11.2	rs157845	55296639:56296639	SSE	7.26375e-09	-0.021694	0.00375003	0.3854	-0.00302904	0.00348971	0.000268783		0.0865431	0.0233909	0.0136472	0.00206152	0.0388173	0.0125972	0.00129531		-0.0185288	0.003616	2.98934e-07	-4.65663e-05	0.00336305	0.988953	CTC-236F12.4, AC022431.1	RPL26P19
8	q23.3	rs2737263	116167539:117167539	CED	7.68781e-09	-0.024917	0.00431428	9.32074e-12	-0.0273165	0.00400709	0.0171178	CED	8.2546e-05	-0.0326604	0.00829493	0.0209735	-0.017523	0.00759046	0.0147363		-0.0265657	0.00382753	3.90178e-12	-0.025182	0.00354361	1.19189e-12	TRPS1	TRPS1
19	q12	rs57894940	29793462:30793462	CED	9.2306e-09	0.0212081	0.00369184	2.82865e-12	0.0239833	0.00343284	0.0973465		0.780479	0.0031366	0.0112545	0.00177128	0.0324275	0.0103724	0.027824		0.0194524	0.00350793	2.93483e-08	0.0248169	0.00325899	2.63883e-14	C19orf12, CCNE1	CCNE1, C19orf12
18	q21.32	rs17700028	57275684:58275684	CED	9.68333e-09	-0.0309588	0.00539683	5.22141e-06	-0.0228617	0.00501813	0.235297		0.0444447	-0.0235494	0.0117164	0.00787087	-0.0282714	0.0106376	0.136706		-0.0296619	0.00490181	1.4376e-09	-0.0238464	0.00453849	1.4862e-07	RNU6-567P, RP11-795H16.3
12	q24.31	rs7133378	123909502:124909502	CED	9.7294e-09	0.0213698	0.00372577	5.71177e-10	0.0215136	0.00347077	0.153388	CED	0.039377	0.0168511	0.00817892	0.0001236	0.029051	0.00756688	0.0028144		0.0205933	0.00339055	1.24983e-09	0.0228237	0.00315474	4.66424e-13	CCDC92	ZNF664, RP11-380L11.4, CCDC92, DNAH10OS, DNAH10
10	q24.32	rs11191515	104276527:105276527	SSE	9.78477e-09	0.037132	0.00647496	0.104902	0.00983239	0.00606358	0.00142418	CED	0.00115287	0.0466298	0.0143451	0.19596	0.017141	0.013255	0.0162006		0.0387395	0.00590162	5.23076e-11	0.0110972	0.00551402	0.0441635	CNNM2	BORCS7, SFXN2, AS3MT, NT5C2, ATP5MD, MARCKSL1P1, SH3PXD2A, TRIM8, WBP1L, MFSD13A, CNNM2
13	q12.2	rs9512696	27512527:28512527	CED	1.00818e-08	0.0209921	0.00366378	3.60354e-06	0.0158077	0.00341186	0.1581		0.875574	-0.00119208	0.00761305	0.00457025	-0.0198326	0.00699312	0.0085178		0.0168204	0.00330137	3.48796e-07	0.0089552	0.00306637	0.0034952	MTIF3	GTF3A, MTIF3
19	q13.32	rs3810291	47069003:48069003	CED	1.15013e-08	0.0210921	0.00369566	4.34384e-10	0.0215326	0.00344993	0.0772803		0.000715148	-0.026773	0.00791159	0.60017	0.0038082	0.00726534	0.00220645		0.0125186	0.00334836	0.000184951	0.0182714	0.00311643	4.54746e-09	ZC3H4	TMEM160, SAE1
15	q24.1	rs1904335	72951443:73951443	CED	1.21243e-08	0.0209286	0.0036728	9.66004e-06	0.0151305	0.0034195	0.0113831		0.116213	-0.012424	0.00790876	0.00186	-0.0227296	0.00730404	0.00395535		0.0150117	0.00333112	6.59052e-06	0.00832417	0.00309691	0.00719045	NEO1	NEO1
16	p13.3	rs4785955	3797651:4797651	CED	1.21919e-08	0.0237685	0.00417187	0.00266484	0.0116554	0.00387994	0.0309931	SSE_Male	0.000162197	0.0334556	0.00886935	0.294127	0.00852831	0.00812899	0.0146876		0.0255235	0.0037751	1.37047e-11	0.0110752	0.00350154	0.0015618	RP11-95P2.1	TFAP4, LINC01569
4	q21.21	rs35851183	80217182:81217182	CED	1.28627e-08	0.0205408	0.00361114	0.000106117	0.0130608	0.00336945	0.115228		0.0552424	0.0166529	0.0086868	0.0124069	0.020028	0.00800969	0.00922629		0.0199679	0.0033345	2.12064e-09	0.0141084	0.00310583	5.55786e-06	RP11-452C8.1, PCAT4	ANTXR2
16	q24.1	rs4783156	84820577:85820577	AED	1.3909e-08	-0.0242728	0.00427731	0.023903	-0.0089894	0.00397989	0.00360738		0.139522	0.0129156	0.00874087	0.000941577	0.0266822	0.00806679	0.0457311		-0.0170881	0.00384198	8.67768e-06	-0.0020063	0.00356914	0.574032	LINC00311, MIR5093
6	p21.2	rs9471333	39862023:40862023	CED	1.45713e-08	-0.0197072	0.00347764	4.7572e-11	-0.0213371	0.00324335	0.174697	CED	0.003693	0.0224767	0.00774133	0.000136617	0.027303	0.00715756	0.0848375		-0.0126237	0.00317225	6.9087e-05	-0.0130511	0.0029542	9.97084e-06	LRFN2	LRFN2
16	q22.2	rs28483459	71498398:72498398	SSE	1.54718e-08	-0.0304513	0.00538339	0.286549	-0.00538595	0.00505379	0.000687279		0.848819	-0.00242667	0.01273	2.78862e-05	-0.048863	0.0116603	0.00357352		-0.0261998	0.00495826	1.26342e-07	-0.0122616	0.00463699	0.00818604	PKD1L3	PHLPP2, ZNF23, HPR
9	p22.3	rs62571029	15017878:16017878	CED	1.55457e-08	-0.0480657	0.00849861	2.58369e-07	-0.0406041	0.00788167	0.0706993		0.0351113	-0.035612	0.0169005	0.00331035	-0.0462248	0.015736	0.0336786		-0.0455521	0.00759268	1.97947e-09	-0.0417314	0.00704713	3.18526e-09	PSIP1, RN7SL98P
3	q21.1	rs12330631	122589834:123589834	CED	1.55855e-08	-0.0205502	0.00363382	0.00114682	-0.011009	0.00338549	0.0123347		0.0264486	0.0218512	0.0098444	0.000475057	0.0316852	0.0090666	0.0914085		-0.0154656	0.00340899	5.71353e-06	-0.00578461	0.0031716	0.0681703	ADCY5	ADCY5, SEC22A
8	p21.2	rs11781222	22889571:23889571	SSE	1.67741e-08	-0.0266471	0.00472246	1.14108e-05	-0.0193378	0.00440631	8.68463e-05	AED	0.891811	-0.00242596	0.0178362	7.75348e-05	-0.0651316	0.0164795	0.00490866		-0.0250604	0.00456516	4.03098e-08	-0.0223933	0.00425677	1.43567e-07	SLC25A37	NKX3-1, SLC25A37, LOXL2
16	p11.2	rs62037428	28508079:29508079	SSE	1.69881e-08	-0.0206583	0.00366252	1.45824e-07	-0.017895	0.00340342	0.00096368	AED	0.00177473	-0.0252812	0.00808788	0.0168988	-0.0177272	0.00742034	0.00434425		-0.021445	0.00333637	1.29611e-10	-0.0178658	0.00309355	7.6863e-09	LAT, CTB-134H23.2	NPIPB15, EIF3CL, NFATC2IP, EIF3C, SH2B1, SBK1, TUFM, NUPR1, SPNS1, SGF29, SULT1A1, ATP2A1, SULT1A2, AC145285.4, CLN3
2	p16.3	rs6545039	48146493:49146493	SSE	1.71562e-08	0.0197303	0.00349905	0.32345	0.00322052	0.00326163	0.000199661		0.964608	-0.000513553	0.0115736	0.000191072	-0.0396782	0.0106351	0.00597637		0.0180349	0.00334933	7.25912e-08	-0.000467481	0.00311828	0.880831	FOXN2, RP11-191L17.1	PPP1R21, STON1, FOXN2, MSH6
13	q34	rs9522257	111671024:112671024	CED	1.72977e-08	0.0199374	0.00353666	0.00489439	0.00924726	0.00328624	0.00373179		0.000583594	0.0267965	0.00779088	0.468878	0.00517621	0.00714639	0.00942926		0.0211093	0.00322038	5.56702e-11	0.00853666	0.00298569	0.00424723	TEX29, RP11-65D24.2
2	q36.3	rs34412673	230092359:231092359	CED	1.80386e-08	0.0210318	0.00373559	5.20641e-08	0.0189172	0.00347465	0.0997062	CED	0.00369797	0.0233485	0.00804275	0.000128752	0.0284487	0.00742941	0.0207574		0.0214429	0.00338798	2.46579e-10	0.0206279	0.00314744	5.60664e-11	DNER, TRIP12	TRIP12, SP110
3	q22.3	rs2347252	137595525:138595525	AED	1.84241e-08	-0.0265566	0.00471994	0.000803712	-0.0147582	0.00440336	0.01204		0.0108893	0.0204071	0.00801417	0.910312	-0.000831583	0.00738225	0.00157531		-0.0144619	0.00406701	0.00037668	-0.0111036	0.00378171	0.00332346	MRAS	ESYT3, CEP70, MRAS, FAIM
19	p13.2	rs62621197	8170147:9170147	CED	1.86104e-08	-0.0542661	0.00964778	3.86305e-13	-0.06481	0.00892603	0.422432	CED	0.275353	-0.0179851	0.0164874	0.0073944	-0.0403462	0.015062	0.126586		-0.0450118	0.00832692	6.45999e-08	-0.0584515	0.0076789	2.69969e-14	ADAMTS10
16	q22.2	rs62051148	71999147:72999147	SSE	1.89102e-08	-0.0302662	0.00538357	0.299428	-0.00524446	0.0050541	5.86153e-07		0.910687	0.00181654	0.0161941	0.00115653	-0.0483961	0.0148929	0.00912288		-0.0270734	0.00510867	1.16122e-07	-0.00970088	0.00478601	0.0426702	AC004158.2	HPR
14	q23.2	rs217667	61858847:62858847	CED	1.98348e-08	0.0224884	0.00400597	0.00050896	0.012953	0.00372635	0.0347546	CED	0.00220267	0.0236326	0.0077188	0.0792119	0.0124904	0.00711574	0.0841353		0.0227312	0.00355563	1.62656e-10	0.0128534	0.0033011	9.87323e-05	CTD-2277K2.1
10	q26.13	rs12218858	125974200:126974200	CED	1.98554e-08	0.0196471	0.00349994	0.000133332	0.0124596	0.00326141	0.00728478		0.00211795	0.0234826	0.00764055	0.721131	-0.00250853	0.00702767	0.00614494		0.0203123	0.00318198	1.7304e-10	0.00980715	0.00295836	0.000916217	METTL10	FAM53B, EEF1AKMT2
5	q21.3	rs13166413	105290223:106290223	CED	2.10357e-08	-0.0198753	0.00354692	0.00762086	-0.00881214	0.00330234	0.0224403		0.00153803	0.0278383	0.00878823	0.460114	-0.0059699	0.00808201	0.00119639		-0.0131918	0.00328913	6.05323e-05	-0.0084055	0.00305699	0.00596684	CTC-278L1.1, CTD-2285G11.1
15	q22.33	rs12901071	66870389:67870389	CED	2.17744e-08	0.0207248	0.00370248	7.74076e-05	0.0136169	0.00344525	0.111289		0.199329	0.0105331	0.00820659	0.00125122	0.0243918	0.00755829	0.0116567		0.0190012	0.00337491	1.8007e-08	0.0154705	0.00313493	8.01965e-07	SMAD3	SMAD3
3	p12.1	rs11719438	85427575:86427575	SSE	2.2473e-08	0.0261049	0.0046682	0.142756	0.00636133	0.00434039	0.00181814	SSE_Male	0.000334491	0.0316577	0.00882472	0.447242	-0.00616366	0.00810978	0.00080062	SSE	0.027319	0.00412642	3.57946e-11	0.00357247	0.00382678	0.350538	CADM2
12	q23.3	rs2287214	107590518:108590518	CED	2.34053e-08	0.0197727	0.00354031	9.05893e-10	0.0201744	0.00329353	0.0541216		0.002575	-0.027018	0.00896234	0.0903748	0.0140689	0.00830777	0.000386751		0.0134569	0.00329272	4.37219e-05	0.0193452	0.00306171	2.64257e-10	PWP1	BTBD11, PWP1, PRMT1, ASCL4, ADM5, PRDM4
10	q24.31	rs41310284	101947647:102947647	AED	2.36409e-08	-0.0322518	0.0057765	5.68429e-08	-0.029065	0.00535397	0.169183	AED	0.00598554	0.0221552	0.00806008	0.607943	0.00383014	0.00746592	0.0383141		-0.0137895	0.00469521	0.00331478	-0.0178934	0.00435086	3.91213e-05	HIF1AN, PAX2	HIF1AN, SEC31B, CWF19L1
6	p12.3	rs1414506	50987416:51987416	CED	2.3735e-08	0.0196374	0.00351762	7.32671e-05	0.0129718	0.00327115	0.0158926		0.000635873	-0.0307722	0.00900783	0.530448	-0.00520985	0.00830483	0.00503981		0.0129673	0.00327664	7.57388e-05	0.0105299	0.00304356	0.000540748	PKHD1
6	p22.2	rs72834677	25606604:26606604	CED	2.4664e-08	0.0292265	0.00524157	0.0026531	0.0146568	0.00487691	0.00204589		0.020579	-0.0232866	0.0100558	0.00050731	-0.0322942	0.00928758	0.00877725		0.018007	0.00464803	0.000107011	0.00450904	0.00431783	0.296354	HIST1H4C, HIST1H1T	BTN3A2, TRIM38, HIST1H4D, FBRSL1, GUSBP2
17	q25.3	rs147576596	78222281:79222281	CED	2.54741e-08	-0.0207083	0.00371765	5.68707e-07	-0.0173435	0.00346751	0.0168623		0.474909	-0.00861637	0.0120589	0.000581111	-0.0380132	0.0110486	0.0212698		-0.0196588	0.00355265	3.13811e-08	-0.0191968	0.0033084	6.53524e-09	RPTOR	RPTOR
16	q12.2	rs62033401	53314470:54314470	SSE	2.63497e-08	-0.0288457	0.005184	0.0303207	-0.0104149	0.00480859	0.00914454	SSE_Male	0.000243121	-0.0418633	0.0114075	0.695994	-0.00406378	0.0104003	0.000881734	SSE	-0.0310739	0.00471953	4.57648e-11	-0.00929634	0.00436465	0.0331786	FTO	RBL2
17	q21.2	rs7501974	38758773:39758773	SSE	2.67167e-08	-0.0209184	0.00376096	0.138184	-0.00519715	0.00350545	0.00052362		0.679477	0.0040878	0.00989348	0.00712469	0.0243769	0.00905835	0.0343135		-0.017761	0.00351551	4.36791e-07	-0.00134508	0.00326919	0.680749	KRTAP4-16P, KRTAP4-9	KRTAP4-7, KRT36, KRTAP2-4, KRTAP2-1, KRTAP4-6, KRTAP4-5, KRT23
7	p14.3	rs215607	31838337:32838337	CED	2.75576e-08	-0.0230572	0.00414955	0.013733	-0.00950819	0.00385854	0.000582179	SSE_Male	0.00331799	0.0306601	0.0104398	0.344743	0.00900083	0.00952624	0.0377865		-0.0157285	0.00385611	4.52602e-05	-0.00689957	0.00357631	0.0537009	PDE1C
2	q13	rs13407583	113467740:114467740	SSE	2.78493e-08	0.0236331	0.0042546	0.418845	0.00321157	0.00397261	6.37514e-05		0.00121607	0.0355421	0.0109855	0.442555	0.00776744	0.0101153	0.0314479		0.0251864	0.00396744	2.17747e-10	0.00382036	0.00369767	0.301519	PSD4, PAX8-AS1	PSD4
7		rs6970803	112505734:113505734	CED	2.9222e-08	0.0203419	0.00366764	0.00626234	0.00932579	0.00341135	0.0113145		3.89375e-06	0.0355067	0.00768916	0.00186343	0.0221156	0.00710799	0.0597936		0.0231527	0.00331034	2.67079e-12	0.0117202	0.00307549	0.000138496
8	q24.13	rs2980888	126007308:127007308	CED	2.98684e-08	0.020926	0.00377556	0.00899773	0.00920724	0.00352475	0.0232795		0.00177258	-0.024153	0.00772609	0.0847936	-0.0122227	0.00709149	0.0276756		0.0122361	0.00339219	0.000309588	0.00496183	0.00315636	0.115948	RP11-136O12.2
12	q24.23	rs9805009	117905172:118905172	CED	3.01029e-08	-0.0211999	0.00382594	0.000475237	-0.0124466	0.00356186	0.00473257	SSE_Male	0.0058986	-0.0219629	0.00797622	0.446379	0.00558192	0.00733042	0.00228347		-0.0213426	0.00344962	6.13401e-10	-0.00900308	0.00320369	0.00495068	KSR2	KSR2, VSIG10
1	p33	rs6700838	47200027:48200027	CED	3.21499e-08	-0.0194415	0.00351591	4.46339e-05	-0.0133719	0.00327569	0.0775925		0.521739	0.00492766	0.00769136	0.000304003	0.0255785	0.00708119	0.00248285		-0.0152294	0.00319765	1.91032e-06	-0.00650612	0.002973	0.0286405	TAL1, STIL	LINC00853, PDZK1IP1, TAL1
1	p36.23	rs301806	7982078:8982078	SSE	3.39651e-08	0.0199206	0.00360885	0.197903	0.00432117	0.00335611	0.00010761		0.747822	-0.00305585	0.00950453	0.0547496	0.016824	0.00875834	0.0267635		0.0170255	0.00337383	4.50379e-07	0.00592197	0.0031339	0.0588055	RERE	RERE, ENO1, RERE-AS1
1	p31.1	rs12039708	77447009:78447009	CED	3.40581e-08	0.0245128	0.00444116	4.66062e-15	0.0322279	0.00411259	0.127704	SSE_Female	0.146173	0.0142174	0.00978341	1.81542e-08	0.0507874	0.00902112	0.00299776		0.0227537	0.00404399	1.83849e-08	0.0354214	0.00374207	2.91546e-21	AK5	AK5, FUBP1, PIGK
12	p13.33	rs55726687	491306:1491306	CED	3.48917e-08	0.023398	0.00424247	3.04968e-06	0.0184042	0.00394299	0.0149788		0.265975	0.0103988	0.0093481	0.000877518	0.0285326	0.00857518	0.0412838		0.0211779	0.00386324	4.2078e-08	0.0201719	0.00358242	1.79376e-08	WNK1	AC021054.1, RAD52
3	q29	rs6782581	196479106:197479106	SSE	3.64882e-08	-0.0191991	0.00348611	0.318707	-0.00324276	0.00325212	0.000620078	AED	0.00591481	-0.0234562	0.00852132	0.376759	-0.00692507	0.00783474	0.0550256		-0.0198094	0.00322654	8.27683e-10	-0.00378397	0.00300364	0.207743	DLG1	DLG1
16	p12.3	rs7192550	19763780:20763780	CED	3.69372e-08	-0.0370318	0.00672674	0.0143763	-0.0153312	0.0062634	0.0172042		0.608417	-0.00528777	0.0103208	0.00405166	-0.0275716	0.00959255	0.0568814		-0.0275674	0.00563544	9.99194e-07	-0.0189899	0.00524444	0.000293516	SNRPEP3, GP2
1	p36.21	rs1203678	13605298:14605298	SSE	3.88303e-08	-0.0199768	0.00363456	0.701167	0.00129771	0.00338168	1.74671e-05		0.223372	0.0181671	0.01492	0.0252939	-0.0310059	0.0138607	0.00787611		-0.01784	0.00353129	4.37235e-07	-0.000517115	0.00328532	0.874928	PRDM2	PRDM2
5	q33.2	rs2926867	152716377:153716377	CED	3.9064e-08	-0.0201244	0.00366211	0.000217901	-0.0126117	0.00341099	0.013666		0.380555	-0.00692987	0.00790282	0.001649	-0.0229758	0.00730014	0.0299521		-0.017792	0.0033227	8.57131e-08	-0.0144689	0.00309029	2.84e-06	GRIA1, AC091962.3	FAM114A2
2	q24.3	rs517701	164767386:165767386	CED	3.98673e-08	0.0199772	0.00363771	0.035673	0.00712106	0.00338993	0.00932106		0.761891	-0.00243153	0.00802484	0.000159035	0.0279423	0.00739827	0.00258453		0.0161574	0.00331319	1.07881e-06	0.010734	0.00308182	0.000495812	AC092684.1, AC110086.1
20	q13.12	rs8356	43036455:44036455	CED	4.32169e-08	0.0213455	0.00389699	4.50887e-05	0.0148711	0.00364505	0.0510189		0.67069	0.00625221	0.014704	0.0105104	0.0346827	0.0135549	0.0775674		0.0203549	0.00376694	6.53275e-08	0.0162071	0.00352	4.13868e-06	YWHAB	PABPC1L, TOMM34, YWHAB
2	p23.3	rs1260326	27230940:28230940	SSE	4.40962e-08	0.02133	0.00389669	0.721118	-0.00129838	0.00363727	9.2076e-06		0.0357709	-0.0248942	0.0118566	0.925528	-0.0010265	0.0109817	0.0698547		0.0168239	0.00370189	5.50163e-06	-0.0012715	0.00345281	0.712686	GCKR	ABCG1, FNDC4, ABCA1, PPM1G, IFT172, NRBP1, SLC5A6, GPN1, GCKR, ATRAID, MYLIP, IGFBP1, KRTCAP3, SNX17
19	p13.11	rs8109936	17888011:18888011	CED	4.8593e-08	-0.019604	0.00359268	0.000171239	-0.0125635	0.00334301	0.00877985		0.904896	-0.000989328	0.00828031	0.00822448	-0.0201195	0.00761283	0.0277347		-0.0166549	0.00329582	4.34163e-07	-0.013785	0.00306089	6.68139e-06	KIAA1683, JUND	IQCN, MAST3, LSM4, JUND
5	q11.2	rs6861649	50364788:51364788	CED	5.16726e-08	0.0193849	0.00355966	2.58338e-05	0.0139394	0.00331301	0.033914		0.0049978	0.023829	0.00848802	0.414567	0.00638394	0.00782451	0.03425		0.0200496	0.00328268	1.01076e-09	0.0127908	0.0030508	2.75783e-05	CTD-2335O3.3, RNA5SP182
12	q23.3	rs10861726	107232627:108232627	AED	5.41567e-08	0.0192305	0.00353674	0.0449326	0.00659103	0.00328681	0.000510082		0.221291	0.0119538	0.00977317	0.00777092	-0.0238099	0.00894438	0.0034722		0.0183879	0.00332567	3.21927e-08	0.00297422	0.0030851	0.335017	BTBD11	BTBD11
3	q25.2	rs1568488	153157951:154157951	CED	5.62198e-08	0.019322	0.00355793	6.20441e-06	0.014991	0.00331702	0.0532676		2.48462e-06	-0.0410154	0.00870775	0.0067198	-0.0217537	0.00802555	4.75128e-05		0.0106899	0.00329361	0.00117185	0.00962995	0.00306551	0.00168149	RP11-217E22.5	ARHGEF26, DHX36
4	q23	rs1229984	99739319:100739319	CED	5.77733e-08	0.0630793	0.0116258	0.00366722	0.031988	0.0110095	0.0420365		0.37658	-0.0217451	0.0245923	0.00271267	-0.069757	0.0232622	0.0135053		0.0475851	0.0105105	5.97188e-06	0.0133685	0.00995126	0.179143	ADH1B
12	q24.31	rs2458402	121645773:122645773	CED	5.89107e-08	0.0192495	0.00355004	0.00272776	0.00989688	0.00330237	0.0106225		0.00338601	0.122079	0.0416575	0.236538	0.0469686	0.0396794	0.0488062		0.0199909	0.00353722	1.58972e-08	0.0101519	0.00329099	0.00203722	MORN3, TMEM120B	TMEM120B, WDR66, MORN3, ORAI1, AC084018.1
16	q21	rs2917685	63796852:64796852	AED	5.98337e-08	-0.0192401	0.00355014	0.937515	-0.000259123	0.0033054	8.76684e-05		0.0714976	-0.0280497	0.0155627	0.678716	-0.00590627	0.0142588	0.147067		-0.0196759	0.00346122	1.31079e-08	-0.000547114	0.00322001	0.865081	AC012322.1
13	q32.2	rs7139583	98613230:99613230	CED	6.3363e-08	-0.0205872	0.00380589	0.000426421	-0.012519	0.00355327	0.0125145		9.79086e-05	0.0308966	0.00792991	0.0778627	0.0128634	0.00729518	0.00906094		-0.0109485	0.00343118	0.00141842	-0.00765197	0.00319449	0.0166038	STK24	STK24, FARP1-AS1, FARP1
10	q25.2	rs36090025	114274433:115274433	CED	6.4044e-08	-0.020429	0.00377798	0.0136958	-0.00868912	0.00352476	0.0230791		0.00243147	-0.0493185	0.0162661	0.0943049	-0.0251894	0.0150551	0.0206836		-0.0219077	0.00368002	2.63054e-09	-0.00954657	0.00343196	0.005408	TCF7L2	TCF7L2
3	q13.31	rs2918217	115046380:116046380	AED	6.44503e-08	0.0271455	0.00502114	0.771983	-0.00135167	0.00466442	3.20869e-05		0.000270727	0.0413415	0.0113507	0.40009	0.00893109	0.0106137	0.00283364		0.0294688	0.00459191	1.3849e-10	0.000312822	0.00427025	0.941602	LSAMP	LSAMP
15	q23	rs140450540	67420679:68420679	CED	6.5355e-08	0.0741475	0.0137215	0.0815111	0.0226128	0.012981	0.00636571		0.808847	0.00318444	0.0131634	0.0101554	0.0310621	0.0120835	0.0593622		0.0371935	0.0094991	9.0227e-05	0.0271396	0.00884461	0.00215142	HNRNPA1P5	CLN6, MAP2K5
11	p11.2	rs34942378	46596981:47596981	CED	6.56186e-08	-0.0385253	0.00713033	0.079209	-0.0115782	0.00659614	0.00112347		0.000107853	-0.0470711	0.0121546	0.508025	-0.00746074	0.0112713	0.00678337		-0.0407133	0.00615017	3.59525e-11	-0.0105278	0.00569294	0.0644182	C11orf49	MADD, SPI1
8	q24.3	rs12681478	144441419:145441419	CED	7.55287e-08	0.0190007	0.00353321	0.0244935	0.0073907	0.00328575	0.0161166		0.521478	-0.00495563	0.00773019	0.102607	0.0116361	0.00712831	0.0572959		0.0148608	0.00321346	3.75383e-06	0.00813465	0.002984	0.00640901	EPPK1	EPPK1, NRBP2, SCRIB, GRINA, PLEC
6	q26	rs17630640	163607529:164607529	AED	7.66078e-08	0.0275293	0.00512156	0.00260426	0.0143692	0.00477223	0.060118		0.879807	0.00116899	0.00773065	0.00236415	0.0214583	0.00705775	0.0262958		0.0194887	0.00426959	5.00611e-06	0.0165934	0.00395331	2.70057e-05	RP5-826L7.1, RP1-230L10.1
3	q25.31	rs7610493	155813067:156813067	CED	7.67195e-08	-0.0261188	0.00485939	0.0518083	-0.0087895	0.00451964	0.00902042		0.760476	-0.00361986	0.0118739	0.066519	-0.0202065	0.011012	0.0229092		-0.0228911	0.00449734	3.58204e-07	-0.0104354	0.00418118	0.0125668	SSR3, TIPARP-AS1	TIPARP-AS1
2	p25.3	rs6710140	121006:1121006	CED	8.08827e-08	0.0197385	0.00367886	1.71479e-05	0.0147193	0.0034237	0.0184401		0.123875	0.0124636	0.00809979	5.46997e-06	0.0340943	0.00749902	0.00078916		0.0184944	0.00334956	3.36217e-08	0.0180612	0.00311446	6.66508e-09	AC093326.3, TMEM18	LINC01115, SH3YL1
8	q21.3	rs74387907	92646876:93646876	AED	8.17817e-08	0.0361435	0.00673892	0.0896383	0.010651	0.00627518	0.00563225		0.00787055	0.0579935	0.0218206	0.109315	-0.0315031	0.0196733	0.00115882		0.038046	0.00643885	3.44555e-09	0.00675824	0.00597842	0.258291	RUNX1T1, RP11-777J24.1
6	q25.3	rs9365169	160466347:161466347	CED	8.32986e-08	-0.0185564	0.00346196	0.000780937	-0.0108297	0.00322357	0.00212319		0.452627	0.00574405	0.007648	0.00146527	0.022415	0.007045	0.000826471		-0.0144239	0.00315389	4.79917e-06	-0.0050743	0.00293128	0.0834368	LPA	LPA, SLC22A3
12	q24.31	rs11060333	122178607:123178607	CED	9.06426e-08	0.0208083	0.00389319	5.81733e-05	0.0145547	0.0036204	0.0355604		0.931081	-0.000748995	0.00866031	6.74832e-08	0.042471	0.00786686	0.000101262		0.0171842	0.00355089	1.30229e-06	0.0194338	0.00328884	3.44153e-09	LRRC43	HCAR3, VPS33A, DIABLO, LRRC43, B3GNT4
18	q21.32	rs12963186	57413703:58413703	CED	9.12476e-08	0.0740524	0.0138582	0.00015363	0.0479307	0.0126626	0.00982015		0.791899	0.00773995	0.0293349	0.0244817	0.0612888	0.0272447	0.0728323		0.0619534	0.0125303	7.64296e-07	0.0503036	0.011483	1.18286e-05	RP11-795H16.2, RP11-396N11.1
2	q33.3	rs4482463	204875909:205875909	CED	9.1688e-08	-0.0247715	0.0046365	0.000141516	-0.0164984	0.00433533	0.0550218		2.50128e-06	0.0491717	0.0104423	0.157944	0.0135763	0.00961463	0.00129701		-0.0125945	0.00423757	0.00295758	-0.0114168	0.00395213	0.0038675	AC016903.2, PARD3B
12	q23.2	rs11111540	103261501:104261501	CED	9.66364e-08	-0.0197413	0.0037016	0.0213128	-0.00793641	0.00344699	0.0181179		0.915475	0.00082194	0.00774417	0.00405196	0.0206387	0.00718054	0.0302982		-0.015917	0.0033397	1.8793e-06	-0.00258471	0.00310749	0.405539	C12orf42
3	p21.31	rs7635641	48796069:49796069	CED	9.70881e-08	0.0188215	0.0035297	0.00105634	0.0107317	0.00327674	0.036064		0.00433234	-0.0230615	0.00808297	0.155433	-0.0105321	0.00741373	0.0289089		0.0121138	0.00323473	0.000180446	0.00725668	0.00299705	0.0154663	CCDC36, RP11-3B7.1	MON1A, APEH, WDR6, AMT, USP19, DALRD3, UBA7, QRICH1, USP4, ATRIP, CCDC36, ARIH2, P4HTM, KLHDC8B, NICN1, NCKIPSD, RBM6
3	q22.1	rs11928040	131229115:132229115	CED	1.00358e-07	0.0203058	0.00381235	0.000913382	0.0117833	0.00355349	0.0360596		8.79906e-05	0.0330552	0.00842808	0.0014875	0.0245345	0.00772175	0.0279023		0.0224714	0.00347352	9.84312e-11	0.0140118	0.00322808	1.42097e-05	CPNE4	CPNE4
3	q13.13	rs55689442	107619528:108619528	CED	1.01231e-07	0.0184966	0.00347371	0.00176802	0.0101054	0.00323197	0.00762297		0.155903	-0.0126818	0.00893701	0.00474832	-0.023294	0.00824921	0.00789611		0.0144045	0.00323773	8.6299e-06	0.00566082	0.00300925	0.059953	MYH15	CD47, DZIP3, HHLA2, CIP2A, MYH15, TRAT1, IFT57
2	p25.3	rs61080649	184057:1184057	AED	1.03138e-07	-0.0380493	0.00715032	3.81708e-08	-0.0364947	0.00663619	0.00423581		0.00385168	-0.0700694	0.0242432	0.0833533	-0.0393585	0.0227297	0.119245		-0.0406118	0.00685824	3.18803e-09	-0.0367196	0.00637024	8.2022e-09	AC092159.2	LINC01115
10	p12.31	rs10828247	21322856:22322856	CED	1.10892e-07	-0.0203872	0.00384074	8.54571e-11	-0.0231723	0.00356989	0.0688621		0.065764	0.015294	0.00831155	1.36288e-06	0.0369316	0.0076446	0.00654733		-0.0141087	0.00348649	5.19489e-05	-0.0124119	0.00323458	0.000124426	SKIDA1, MLLT10	NEBL, MLLT10
6	p21.32	rs9277990	32808607:33808607	CED	1.12946e-07	0.0235697	0.00444309	2.56218e-07	0.021408	0.00415424	0.0390903		0.00302988	0.0261554	0.00882166	0.000384431	0.0289	0.00813893	0.0199385		0.0240929	0.0039682	1.26726e-09	0.0229564	0.00370012	5.49616e-10	MYL8P, LYPLA2P1	ZBTB22, B3GALT4, RPS18, WDR46, DAXX, TAPBP, HLA-DPB2, CUTA, VPS52
4	q24	rs57957741	102664166:103664166	AED	1.13803e-07	-0.0184487	0.00347864	0.0664847	-0.00594474	0.00323937	0.00852467		0.00364859	0.0224734	0.00773008	0.421256	0.00569673	0.00708326	0.028147		-0.0115571	0.00317223	0.000269257	-0.00393109	0.00294592	0.182066	BANK1, SLC39A8	SLC39A8
16	q22.1	rs9302605	69472486:70472486	CED	1.14918e-07	0.0183758	0.00346607	0.0062014	0.00885231	0.00323435	0.0434886		0.00481365	-0.0595093	0.0211068	0.99019	-0.000233424	0.0189849	0.0110243		0.0163306	0.00342026	1.79996e-06	0.00859604	0.00318841	0.00701718	WWP2	NPIPB14P, CLEC18C, CLEC18A, MIR140, PDXDC2P, SMG1P7, AC009022.1, WWP2, EXOSC6, AARS, COG4
11	q25	rs10894670	132721987:133721987	CED	1.16953e-07	-0.0184689	0.00348572	0.0374118	-0.00675922	0.00324766	0.0139771		0.00936458	-0.025937	0.00998112	0.770498	-0.00269158	0.00922641	0.00286714		-0.0192807	0.00329081	4.658e-09	-0.00631079	0.00306342	0.0393938	OPCML
1	p33	rs6697839	49891338:50891338	CED	1.17136e-07	0.0196707	0.00371276	6.88598e-09	0.0199987	0.00345166	0.202371	SSE_Female	0.651479	0.00356852	0.00789996	0.000669039	-0.0247089	0.00726257	0.00341453		0.0167576	0.00336017	6.12858e-07	0.0117609	0.00311748	0.000161572	AGBL4	AGBL4
11	p15.2	rs11823635	12849479:13849479	CED	1.24906e-07	0.0186179	0.00352184	0.000372354	0.0116458	0.00327221	0.0171235		6.4629e-05	-0.0307451	0.00769445	0.725405	-0.00248503	0.0070749	0.00275476		0.0100676	0.00320233	0.00166746	0.00915568	0.00296994	0.00205072	ARNTL	ARNTL
2	p25.3	rs56046241	57624:1057624	CED	1.26942e-07	-0.0352005	0.00666241	0.000279263	-0.0227539	0.0062616	0.0144284		0.087084	-0.0257354	0.0150408	0.00904714	-0.0362195	0.0138751	0.0184876		-0.033648	0.00609155	3.31906e-08	-0.0250323	0.00570734	1.15468e-05	AC093326.2, AC093326.3
2	p14	rs2861685	67337553:68337553	CED	1.29314e-07	-0.0185253	0.00350854	0.000105598	-0.0127078	0.00327737	0.00183222		0.000593991	-0.0365333	0.0106366	0.186708	-0.0128514	0.00973292	0.00459469		-0.0202924	0.00333195	1.12744e-09	-0.0127224	0.00310601	4.2022e-05	AC010987.5
3	q26.2	rs1879442	170227351:171227351	CED	1.53184e-07	0.0202349	0.00385506	6.19998e-05	0.0143154	0.00357425	0.0450393		0.000588894	0.030553	0.0088894	0.0222902	0.0187183	0.00819013	0.035662		0.0218682	0.0035368	6.28709e-10	0.0150198	0.00327589	4.54082e-06	SLC2A2	RPL22L1, EIF5A2, SLC2A2
3	p25.2	rs2596902	12455982:13455982	CED	1.62417e-07	-0.0192983	0.0036842	0.00683119	-0.00929889	0.00343768	0.00822162		0.00214263	0.0239333	0.00779596	0.486488	-0.00499705	0.00718058	0.00155625		-0.011406	0.00333098	0.000616577	-0.00849676	0.00310066	0.00613821	IQSEC1	RPL32
6	p21.31	rs732594	34706553:35706553	AED	1.62584e-07	-0.0213888	0.00408345	5.86657e-09	-0.0220915	0.00379528	0.0135126		0.00518209	-0.0251241	0.00898676	0.00269609	-0.024759	0.00825135	0.117312		-0.022028	0.00371766	3.11841e-09	-0.0225573	0.00344803	6.06678e-11	SCUBE3	UHRF1BP1, SNRPC, DEF6, ZNF76, SCUBE3, C6orf106
2	q24.3	rs34601572	164789750:165789750	AED	1.71463e-07	0.0464632	0.00888718	0.44152	0.00644295	0.00837148	0.000292153		0.122825	0.0325429	0.0210898	0.00256709	-0.0601184	0.0199365	0.000704363		0.0443641	0.00818973	6.05956e-08	-0.00353411	0.00771861	0.647047	AC110086.1, GRB14
5	q14.3	rs6870983	87197533:88197533	CED	1.78726e-07	-0.0222635	0.00426468	5.04363e-08	-0.0216321	0.00396921	0.00326606		0.00162536	-0.0400651	0.0127127	0.0104182	-0.0303903	0.0118631	0.020128		-0.0240642	0.00404324	2.65343e-09	-0.0225138	0.00376411	2.21513e-09	TMEM161B-AS1	MEF2C, TMEM161B-AS1
19	p13.11	rs2045387	17700586:18700586	CED	1.83837e-07	-0.0210734	0.00404076	0.0148476	-0.00915395	0.00375763	0.0307625		0.000846806	0.0292127	0.00875329	0.14547	0.011849	0.00813943	0.0193572		-0.0122399	0.00366872	0.000849095	-0.00546406	0.00341162	0.109244	IL12RB1	IQCN, MPV17L2, IL12RB1, MAST3
3	q27.2	rs75135487	185305294:186305294	CED	1.90927e-07	0.0212166	0.0040737	0.00748741	0.0101383	0.00379091	0.0194853		0.0764771	-0.0157482	0.00888947	0.001241	-0.0263282	0.00815238	0.121264		0.0148011	0.00370336	6.42373e-05	0.003655	0.00343744	0.28765	ETV5	ETV5
20	q12	rs2903376	39707179:40707179	CED	2.00037e-07	0.0224858	0.00432459	0.0367317	0.00840107	0.00402206	0.00341941		0.00296364	0.0228521	0.00768987	0.186933	0.00928965	0.00703906	0.0140887		0.0225738	0.00376941	2.1154e-09	0.00861978	0.00349218	0.0135754	CHD6	CHD6
9	q21.11	rs2152647	70982288:71982288	AED	2.02922e-07	0.0180067	0.00346492	0.248956	0.00371806	0.00322499	0.000378134		0.86735	-0.00146346	0.00876182	0.0398486	0.0165273	0.008041	0.0651645		0.0153736	0.00322212	1.83065e-06	0.00549299	0.00299322	0.0664846	PIP5K1B	AL353616.2, PGM5
7	p14.1	rs17171504	38520328:39520328	CED	2.08467e-07	-0.0181082	0.00348782	0.0104031	-0.00832709	0.00325003	0.00961377		0.000133559	-0.0475368	0.0124433	0.972822	0.000392348	0.0115163	0.00235006		-0.0202519	0.00335839	1.63715e-09	-0.00768387	0.00312786	0.0140262	POU6F2
7	p15.2	rs9770544	26732126:27732126	CED	2.26986e-07	-0.0306798	0.00592735	0.0562264	-0.0105055	0.00550232	0.0101888		0.11663	0.0184198	0.0117389	0.000265385	0.0394129	0.0108062	0.00903681		-0.0207047	0.0052911	9.11099e-05	-0.000227968	0.00490328	0.962917	RP1-170O19.14	HOXA5, HOXA4, HOXA9, HOTAIRM1, SKAP2, HOXA6
18	p11.22	rs62086105	8963671:9963671	CED	2.27454e-07	-0.046692	0.00902157	0.301345	-0.00861367	0.00833401	0.0019328		0.64044	0.00584433	0.0125122	0.00631884	-0.0314796	0.0115272	0.00293246		-0.0287219	0.00731777	8.6744e-05	-0.016463	0.00675376	0.0147849	TWSG1, RP11-61L19.2	TWSG1, RALBP1
16	q24.1	rs139929928	84823516:85823516	CED	2.38273e-07	0.0634988	0.0122895	0.0191877	0.0269961	0.0115275	0.0301981		0.0195657	0.0658432	0.0282021	0.175812	0.0343155	0.0253478	0.137978		0.0638729	0.0112663	1.43307e-08	0.0282505	0.0104933	0.00709769	LINC00311, MIR5093
17	p13.3	rs4790841	1335482:2335482	CED	2.43708e-07	-0.024827	0.00480892	7.2901e-15	-0.034692	0.00445915	0.0218334	AED	0.000154478	-0.0371433	0.00981537	0.037307	-0.0188319	0.00904311	0.0122902		-0.0272111	0.00431847	2.9554e-10	-0.0315899	0.00399936	2.8174e-15	RPA1, RTN4RL1	RPA1, RTN4RL1
6	p22.2	rs1535274	26020747:27020747	CED	2.4392e-07	0.0183017	0.00354511	1.21581e-13	0.0244745	0.00330041	0.118854	CED	0.0248672	-0.0267979	0.0119444	9.86558e-05	-0.0431196	0.0110726	0.00639714		0.0146505	0.00339858	1.62689e-05	0.0189591	0.00316289	2.04469e-09	RNU6-502P, HCG11	ZNF204P, HMGN4, BTN2A3P, BTN3A2, HIST1H4H, ABT1, HCG11, BTN3A1, ZNF322P1, HIST1H2BK, BTN2A1, LINC00240, ZNF322, GUSBP2, AL513548.1
11	q23.2	rs719802	112734679:113734679	CED	2.49112e-07	-0.0183466	0.00355652	0.00136	-0.0105941	0.00330751	0.0324365		0.185169	0.0107692	0.00812746	0.00174402	0.0235601	0.00752507	0.0038814		-0.0136673	0.00325822	2.73214e-05	-0.00506421	0.00302794	0.0944264	TTC12	TTC12, ANKK1
1	q21.3	rs114529840	149957517:150957517	CED	2.61175e-07	-0.0380635	0.00739137	4.03314e-09	-0.0404958	0.00688341	0.16913		0.0605124	-0.0185192	0.00986581	0.00373597	-0.026475	0.00912993	0.0951983		-0.0310373	0.00591539	1.54709e-07	-0.0354144	0.00549632	1.16905e-10	RPRD2, TARS2	BNIPL, HORMAD1, CTSS, CTSK, GOLPH3L
10	q24.31	rs7922986	101911904:102911904	CED	2.61729e-07	-0.0180141	0.00349834	0.00255412	-0.0098209	0.0032553	0.0385324		8.2207e-07	0.0443835	0.00900091	0.107091	0.0134458	0.00834398	0.000308494		-0.00982529	0.00326072	0.00258482	-0.00674735	0.00303267	0.0260889	HIF1AN, PAX2	TOLLIP
17	q25.1	rs55823223	73390363:74390363	CED	2.63222e-07	0.0262154	0.00509208	0.0500508	0.00933621	0.00476448	0.011429		0.00351882	0.0240391	0.0082366	0.0846973	0.013053	0.00757089	0.0599421		0.0256136	0.00433121	3.34442e-09	0.0103906	0.00403243	0.00997304	TRIM65	TRIM65, EVPL, UNC13D, GALK1, ACOX1, WBP2, AC087289.1, FBF1, TEN1-CDK3, H3F3B, AC087289.6
11	q13.2	rs35313216	65724195:66724195	CED	2.63293e-07	-0.0349691	0.00679248	6.60322e-10	-0.0386535	0.00625904	0.151311	CED	0.0067242	-0.0400197	0.0147654	4.57045e-07	-0.0688372	0.0136465	0.017094		-0.0358512	0.00617084	6.25536e-09	-0.0438995	0.00568918	1.19739e-14	MRPL11	LRFN4, CTSF, SF3B2, FIBP, RAD9A, PELI3, BANF1, CCS, DPP3, CTSW
8	q21.11	rs13262807	76724826:77724826	CED	2.72876e-07	0.01796	0.00349315	6.1703e-11	0.0213043	0.00325757	0.0254966		3.32274e-06	0.0356135	0.00765785	0.167304	0.00973591	0.00705019	0.00387404		0.0210006	0.00317812	3.89899e-11	0.019269	0.00295716	7.21785e-11	RNU2-54P, RP11-706J10.2
4	q22.3	rs3775048	95626422:96626422	CED	3.01519e-07	0.0181205	0.00353729	0.000674797	0.0111575	0.00328194	0.0601268		0.000158197	-0.0515025	0.0136312	0.594428	-0.0066816	0.0125492	0.00778009		0.0137279	0.00342389	6.08614e-05	0.0100155	0.00317515	0.00160865	UNC5C
12	q24.31	rs2133633	122659400:123659400	CED	3.18223e-07	0.026745	0.00523127	2.92439e-05	0.0202733	0.00485079	0.0105236		0.114472	-0.0122661	0.00777096	0.0169701	-0.0171604	0.00718776	0.0128258		0.0145793	0.00433959	0.000780508	0.00855933	0.00402082	0.0332747	HCAR1	ABCB9, RSRC2, PITPNM2, KMT5A
22	q13.1	rs17752670	37782897:38782897	CED	3.34718e-07	-0.0216775	0.00424801	0.0140671	-0.00971523	0.00395641	0.0252412		5.3999e-05	-0.0310042	0.00767784	0.118321	-0.0109764	0.00702763	0.0029515		-0.0238634	0.00371701	1.3622e-10	-0.0100188	0.0034476	0.00366076	EIF3L	PLA2G6, GCAT, ANKRD54, PICK1, LGALS2, H1F0, TRIOBP, TMEM184B, CDC42EP1, SH3BP1
17	q21.2	rs684214	40196915:41196915	CED	3.71642e-07	0.0195945	0.00385481	0.000446297	0.0125773	0.00358212	0.0777053		0.00107008	0.0253049	0.00773443	0.17796	-0.00953068	0.00707503	0.000185528		0.0207307	0.00345006	1.86896e-09	0.00806639	0.00319585	0.011602	RP11-400F19.8	HSD17B1, COASY, CAVIN1, TUBG2, BECN1, PSMC3IP, MLX, RETREG3, TUBG1, NAGLU, CNTNAP1, STAT3
5	q14.3	rs2112424	87394646:88394646	CED	3.92601e-07	-0.0198713	0.00391729	0.0571415	-0.0069571	0.00365732	0.0149857		0.00248285	0.0427373	0.014125	0.00349502	0.0381518	0.0130628	0.00789784		-0.0153999	0.00377481	4.51072e-05	-0.00367811	0.00352189	0.29632	LINC00461	TMEM161B-AS1
1	q32.1	rs2490414	203031107:204031107	CED	3.9568e-07	0.0177148	0.00349319	0.00116638	0.0105409	0.00324632	0.0117588		0.0147974	-0.018706	0.00767449	0.152476	-0.010046	0.00702094	0.0774229		0.0114642	0.00317934	0.000311144	0.00691481	0.00294659	0.0189395	OPTC, ATP2B4
1	p31.3	rs11208779	65917145:66917145	CED	3.9734e-07	0.0176211	0.00347527	7.12669e-06	0.0145785	0.00324689	0.057678		0.0423429	-0.0156157	0.00769163	0.0100995	-0.0181693	0.00706282	0.0487566		0.0119863	0.00316701	0.000153874	0.00886509	0.00295009	0.00265558	PDE4B	LEPROT
6	q16.1	rs4601133	97853749:98853749	CED	3.97451e-07	0.0331426	0.00653652	0.000595633	0.0209833	0.00611108	0.00391939		0.00282165	0.0455149	0.0152389	0.285207	0.0151676	0.0141924	0.0444179		0.0350652	0.00600722	5.30915e-09	0.0200737	0.00561286	0.000348396	RP11-436D23.1
13	q21.1	rs9317002	58675727:59675727	CED	4.0357e-07	0.0180655	0.00356499	0.0179149	0.00786853	0.00332371	0.0148714		6.34661e-05	0.0308246	0.00770602	0.0817221	0.0122897	0.00705968	0.00954368		0.0203148	0.00323553	3.41482e-10	0.0086707	0.00300711	0.00393406	CTAGE16P, DNAJA1P1
6	p22.2	rs79089106	25786750:26786750	CED	4.33684e-07	-0.0544022	0.0107647	1.8826e-08	-0.0571284	0.0101603	0.320723		0.0390119	-0.0553621	0.0268208	0.0514262	-0.0490374	0.0251737	0.369013		-0.0545354	0.00999009	4.78971e-08	-0.055995	0.00942184	2.79663e-09	HIST1H4H, HIST1H3PS1
3	q22.2	rs6801218	134162251:135162251	CED	4.473e-07	-0.0176874	0.00350394	0.0250229	-0.00732324	0.00326775	0.00345199		0.195204	-0.0153052	0.0118154	0.0189755	-0.0253928	0.0108234	0.0145022		-0.0174948	0.00335933	1.91062e-07	-0.00883274	0.00312828	0.0047501	EPHB1	EPHB1
2	p25.3	rs2685229	0:935315	CED	4.78813e-07	0.0176202	0.00349967	0.00233743	0.00989803	0.003252	0.00639535		0.00246947	-0.0234144	0.00773444	0.000843213	-0.023772	0.00712067	0.0335753		0.0106466	0.00318846	0.00084045	0.00408731	0.00295811	0.167054	AC105393.2, AC093326.1	SPG11, ALKAL2
1	q41	rs6699778	214753661:215753661	AED	4.95929e-07	0.0202074	0.00401891	0.0136581	0.00926598	0.00375726	0.000795245		0.000507147	0.026386	0.00758806	0.0659814	0.0128915	0.0070116	0.0307704		0.0215609	0.00355153	1.27219e-09	0.0100748	0.00331174	0.00234901	KCNK2
3	p21.33	rs9865173	43516658:44516658	CED	5.05011e-07	0.0193284	0.00384675	0.0368368	0.00747955	0.00358288	0.0234713		0.0129609	-0.212215	0.0853991	0.0533531	-0.135946	0.0703613	0.0606205		0.0188596	0.00384285	9.21533e-07	0.00710861	0.00357824	0.0469644	RP4-672N11.1, RP4-555D20.3
4	q24	rs4371620	102208235:103208235	AED	5.13901e-07	0.0176795	0.00352093	2.95877e-06	0.0153297	0.00327991	0.0183824		0.0105486	0.0199242	0.00779063	0.465417	0.00526261	0.00720942	0.0540011		0.0180602	0.00320847	1.81347e-08	0.0136034	0.00298547	5.20071e-06	BANK1
4	p15.31	rs6844623	17889149:18889149	CED	5.21575e-07	0.0174218	0.00347159	4.62135e-11	0.0213063	0.00323655	0.00392126	AED	1.05512e-06	0.040372	0.00826958	0.160647	0.010719	0.00764044	0.00378286		0.0208604	0.00320097	7.17738e-11	0.0196955	0.00298019	3.87403e-11	LCORL, RP11-608B3.1
11	p11.2	rs4647709	46737359:47737359	OED	5.25979e-07	0.0303571	0.0060511	0.765445	-0.0016749	0.0056141	0.000104186		0.0277536	0.0838658	0.0381061	0.696104	0.0135517	0.0346958	0.0218643		0.0316732	0.00597622	1.15884e-07	-0.00128641	0.00554202	0.816446	DDB2	ACP2, C11orf49, NR1H3, ARFGAP2, HARBI1, C1QTNF4, DDB2, SPI1
10	p11.22	rs2804477	33220175:34220175	CED	5.34094e-07	0.0252983	0.0050457	0.0193141	0.0110433	0.00472049	0.0208316		0.0758208	-0.0153814	0.00866305	0.463344	0.00582692	0.00794553	0.0342381		0.0149939	0.00436006	0.000584039	0.00968244	0.0040583	0.0170403	RP11-90B22.1, RP11-476F14.1	NRP1
5	q11.2	rs255755	52807772:53807772	AED	5.49595e-07	-0.0198124	0.00395589	0.0880073	-0.006282	0.00368227	0.00235275		0.0329452	-0.0378169	0.0177308	0.00270251	-0.0481217	0.0160412	0.0508051		-0.0206661	0.00386096	8.67079e-08	-0.00837633	0.00358893	0.0195991	ARL15	ARL15
8	q11.23	rs77897669	53793773:54793773	CED	5.8077e-07	-0.0175709	0.00351579	0.634796	-0.0015565	0.00327691	0.000841305		0.0231147	-0.0278724	0.0122697	0.642637	0.00527858	0.0113758	0.0237782		-0.0183525	0.00337978	5.63205e-08	-0.00103279	0.00314887	0.74292	OPRK1, RP11-1081M5.2
17	q21.31	rs9911991	41778916:42778916	CED	5.98396e-07	0.0206069	0.00412804	9.71339e-10	0.0234531	0.00383574	0.036584	CED	0.254245	0.017169	0.0150589	6.95431e-05	0.0550376	0.0138347	0.0119399		0.0203666	0.00398117	3.12512e-07	0.0257077	0.0036963	3.52617e-12	CTB-175E5.7	TMUB2, ASB16-AS1, C17orf53, SLC4A1, G6PC3, UBTF, HDAC5, ASB16
1	p35.2	rs12739999	31707990:32707990	CED	6.29293e-07	0.0258041	0.00517925	8.14726e-05	0.0190629	0.00483815	0.0358871		0.32229	0.0100472	0.0101509	0.000165034	0.0352806	0.00936415	0.0165254		0.0225494	0.00461344	1.01987e-06	0.02248	0.00429834	1.69581e-07	BAI2	ADGRB2
10	p13	rs4027773	16251164:17251164	CED	6.6705e-07	0.0185917	0.00374011	0.000618177	0.011928	0.00348409	0.0096315		0.00904779	-0.0218265	0.00836134	0.137909	-0.011506	0.0077552	0.182169		0.0118529	0.00341412	0.000517099	0.00799255	0.0031781	0.0119072	RSU1	RSU1
21	q22.12	rs74848904	36112241:37112241	CED	6.70038e-07	-0.0293138	0.00589809	0.0678218	-0.0100797	0.00551948	0.0172618		0.0519136	-0.0256225	0.0131808	0.211361	0.01523	0.0121855	0.0114277		-0.028698	0.00538367	9.7909e-08	-0.00577097	0.00502776	0.251042	RUNX1
17	q21.32	rs12939514	45694264:46694264	CED	6.7363e-07	-0.0342753	0.00689781	4.24709e-10	-0.0402638	0.00644737	0.0330511		0.00251679	0.0449616	0.0148803	0.0752756	0.0243339	0.0136798	0.014499		-0.0202603	0.00625813	0.00120607	-0.0285228	0.00583209	1.00496e-06	SNX11	SNX11, HOXB3, LRRC46, HOXB2, HOXB4, TBKBP1, CDK5RAP3, HOXB-AS1, CBX1, SP6, SCRN2, SKAP1
9	p23	rs12156460	13663477:14663477	AED	7.06772e-07	-0.0187841	0.00378736	0.0786625	-0.00622537	0.00354014	0.000705936		0.00674487	0.0225193	0.00831164	0.346346	0.00724081	0.00768899	0.0172261		-0.0116826	0.00344642	0.000699502	-0.00387005	0.00321567	0.228785	NFIB	EIF2AK2, RASA2, TMEM68, YWHAQ, CCDC57, CIAO2A, PGRMC2, MEF2A, DDX52, HNRNPAB, RAB27A, LRRC27, JMJD1C, USP43, MYL6, SLC16A1, RAB6A, KIF23, NLK, HSPB1, RPA3, MYCBPAP, NTNG2, NR1D1, SENP1, MSL2, RNF7, LPIN1, PTP4A1, TBL1XR1, DAB1, CPT2, FAM49B, HIVEP1, UBTD2, ZBTB49, TLK1, TAF12, SLK, DCAF6, TAF15, HBP1, EXOC1, CEP135, RNF44, CTNNAL1, AK3, SFPQ, UBB, ZMYM5, LINC00240, MECR, MPHOSPH6, GORASP2, RCOR2,…
18	q21.32	rs17835704	56377299:57377299	CED	7.19747e-07	-0.0226257	0.00456518	0.000567177	-0.0146294	0.00424423	0.0243725		0.0375369	-0.0202632	0.00974213	0.0746168	-0.0160082	0.00897896	0.132615		-0.0222003	0.00413382	7.85546e-08	-0.0148812	0.00383715	0.000105236	SEC11C, GRP
13	q13.1	rs34916533	32574674:33574674	CED	7.25302e-07	-0.0172757	0.00348675	0.00466956	-0.00919558	0.00325045	0.0585211		0.47228	-0.00716957	0.0099746	0.00076847	0.0310959	0.0092433	0.00244756		-0.0161753	0.00329145	8.90862e-07	-0.00476143	0.00306638	0.120475	N4BP2L2	PDS5B, N4BP2L2, N4BP2L1
20	q13.2	rs6069625	54247469:55247469	CED	7.3325e-07	0.0189107	0.00381839	0.0563664	0.00678931	0.00355796	0.00800473		0.228639	-0.0147398	0.0122434	0.0138964	-0.028237	0.0114783	0.106721		0.0159278	0.00364523	1.24532e-05	0.00371889	0.00339844	0.273826	CBLN4, RNA5SP487
6	p22.2	rs707889	25595931:26595931	CED	7.77452e-07	-0.020047	0.00405717	2.35908e-10	-0.0239035	0.00377249	0.0230559	AED	0.0130589	0.0204781	0.00824967	0.145219	0.0111742	0.00767116	0.0307573		-0.0121543	0.00364071	0.000842453	-0.0170723	0.00338528	4.58072e-07	HFE	HIST1H3B, U91328.1, HIST1H2BF, TRIM38, BTN3A2, BTN2A2, HIST1H1T, HIST1H4A, BTN2A1, HIST1H2BD, HIST1H2AE, SLC17A3, HIST1H4C, U91328.3, HIST1H4B, HIST1H1C
14	q12	rs2180454	29190513:30190513	CED	8.05237e-07	0.0203914	0.00413259	7.61268e-11	0.0250359	0.00384669	0.0185847	AED	0.0280353	-0.0200537	0.00912824	0.00412595	-0.0240131	0.00837122	0.0274492		0.0135118	0.00376475	0.00033191	0.0164847	0.00349533	2.40283e-06	RP11-148E17.1, RP11-562L8.1
6	p12.3	rs17738108	50647806:51647806	CED	8.61816e-07	0.0200841	0.0040813	0.000543926	0.0131475	0.00380183	0.00527975		0.235338	0.00990759	0.00834855	0.000571769	0.0264103	0.00766643	0.0141562		0.0181212	0.00366661	7.72432e-07	0.0157653	0.00340602	3.68021e-06	FTH1P5, RP3-437C15.2
6	p21.1	rs998584	43257896:44257896	CED	8.79985e-07	-0.0170667	0.003471	0.00128941	-0.0104194	0.00323747	0.135951		5.17887e-05	-0.0308759	0.00762755	0.722977	-0.00248804	0.00701876	0.00196741		-0.0194357	0.00315927	7.65247e-10	-0.00902796	0.0029398	0.00213385	VEGFA, RP11-344J7.2
3	p24.2	rs1561114	24755958:25755958	AED	9.04451e-07	0.0171024	0.00348207	0.998875	-4.57342e-06	0.00324439	0.000133969		0.0154139	-0.0202957	0.00837755	0.385779	-0.00668849	0.00771179	0.0222456		0.0115933	0.00321539	0.000311473	-0.00100968	0.00299052	0.735644	RARB
16	p13.3	rs12709120	4446584:5446584	CED	9.80404e-07	-0.0171393	0.00350087	1.926e-09	-0.0196257	0.00326865	0.00845866		0.0103375	0.0288164	0.0112367	0.0655792	0.0191329	0.0103908	0.027206		-0.0130732	0.00334241	9.1798e-05	-0.0161357	0.00311802	2.2793e-07	PPL	GLYR1, MGRN1, ZNF500, UBN1, PPL, AC020663.2, SEPT12, ROGDI
9	q33.3	rs10987401	128930771:129930771	CED	9.81758e-07	0.0182359	0.00372507	0.000326863	0.0124787	0.00347296	0.0845265		0.000336075	0.0371761	0.0103666	0.674261	0.00400998	0.00954051	0.00562571		0.0204018	0.00350562	5.89351e-09	0.0114878	0.00326346	0.000431339	LMX1B	LMX1B
1	q25.1	rs77154778	173241071:174241071	CED	1.08432e-06	-0.0562062	0.0115274	0.0242656	-0.0246115	0.0109243	0.0298189		1.26022e-06	-0.123113	0.0254007	0.00844081	-0.0615684	0.0233742	0.0188005		-0.0676326	0.010497	1.17109e-10	-0.0312368	0.00989676	0.00159802	KLHL20	PRDX6, RC3H1
2	p25.3	rs10208700	97626:1097626	CED	1.19366e-06	0.0174028	0.00358312	0.000452776	0.011707	0.00333788	0.0495418		0.0675023	0.0189819	0.0103819	0.0170817	0.0225541	0.00945649	0.0583568		0.0175709	0.00338707	2.1298e-07	0.0129087	0.00314756	4.11041e-05	AC093326.3, TMEM18	SH3YL1
12	q24.31	rs77909495	123823592:124823592	CED	1.19626e-06	0.0299483	0.00616673	0.000532781	0.0200096	0.00577682	0.0366592		0.00874429	0.0304449	0.0116111	0.158186	0.0151286	0.0107202	0.019624		0.0300576	0.00544626	3.41059e-08	0.0189112	0.00508545	0.000200261	DNAH10	ZNF664, DDX55, CCDC92, EIF2B1
20	q13.2	rs6021948	50600420:51600420	SSE	1.20662e-06	-0.0180143	0.00371068	4.82639e-11	-0.0227131	0.00345364	0.00678616		3.7909e-05	-0.0341766	0.00829441	0.0317038	-0.0165361	0.00769766	0.0595097		-0.0207096	0.00338717	9.70882e-10	-0.021678	0.00315103	5.99876e-12	RP4-723E3.1	TSHZ2, ZFP64
15	q25.2	rs6603002	84065601:85065601	CED	1.24359e-06	0.0171358	0.00353407	2.12644e-24	0.0335748	0.00329339	5.90473e-05	SSE_Female	0.033867	0.0197993	0.00933162	7.3316e-12	0.0584782	0.00853321	3.44951e-08		0.0174699	0.00330499	1.2508e-07	0.0368034	0.0030725	4.61434e-33	ADAMTSL3	UBE2Q2P1, ADAMTSL3, GOLGA2P7, GOLGA6L5P, NMB
2	q34	rs3791702	211780780:212780780	CED	1.26797e-06	0.0182093	0.00375844	0.00286859	0.0104324	0.00349903	0.0518048		0.942373	0.00394377	0.0545564	0.0205096	0.115427	0.0498178	0.0169835		0.0181419	0.00374955	1.30875e-06	0.0109478	0.00349043	0.00170965	ERBB4
11	p14.2	rs11029806	26575050:27575050	AED	1.28258e-06	-0.017825	0.00368086	0.0331362	-0.00731976	0.00343579	0.0254837		0.54537	0.0047782	0.00790151	0.00877283	0.0190357	0.00726302	0.0291455		-0.0137945	0.00333659	3.55995e-05	-0.00250043	0.00310581	0.420773	RP11-1L12.3	FIBIN, BBOX1
19	q13.41	rs4802779	51315243:52315243	AED	1.31537e-06	0.016741	0.00346061	0.163764	0.00450059	0.00323196	0.00163217		0.00770247	-0.0204463	0.00767215	0.300277	-0.00727432	0.00702254	0.0361491		0.0104541	0.00315455	0.000919783	0.00244249	0.00293595	0.405452	IGLON5	ETFB, AC063977.3, IGLON5, VSIG10L
11	q23.3	rs1135663	116288837:117288837	CED	1.33797e-06	0.0345681	0.00715072	0.0114099	0.016758	0.00662394	0.0335802		0.00443062	0.0830485	0.0291813	0.987729	0.000412833	0.0268417	0.00577774		0.0373143	0.00694524	7.75908e-08	0.0158197	0.00643101	0.0138971	SIK3	SIK3, SIDT2, PAFAH1B2, PCSK7, TAGLN
8	q22.1	rs1023767	95030969:96030969	CED	1.34668e-06	-0.0197409	0.00408468	0.198616	-0.00488485	0.00379994	0.00752759		0.318386	0.00763629	0.00765317	0.000452059	0.0246313	0.00702159	0.0109254		-0.0136712	0.00360354	0.000148344	0.00180145	0.00334194	0.589858	KIAA1429	AC023632.4, RAD54B, VIRMA, AC023632.2, FSBP
15	q25.1	rs34994596	80491447:81491447	CED	1.41673e-06	-0.0182788	0.00379006	1.40466e-06	-0.0169889	0.00352138	0.0275557		0.0617895	0.0198324	0.0106177	0.0050761	-0.0271271	0.00968024	0.000540951		-0.0139716	0.00356947	9.07099e-05	-0.0181737	0.00330923	3.97807e-08	ABHD17C	ABHD17C
10	q24.2	rs12357890	99262693:100262693	CED	1.45069e-06	0.016828	0.00349268	3.22361e-10	0.0204103	0.00324594	0.134693		0.0492857	-0.015025	0.00764169	0.00320035	-0.0208603	0.00707613	0.0668252		0.0113237	0.00317661	0.000364233	0.0132358	0.00295034	7.25109e-06	CRTAC1	R3HCC1L, RAB1B
6	q16.1	rs10499014	97447755:98447755	CED	1.45872e-06	-0.0246209	0.00511126	0.0862088	-0.00815234	0.00475146	0.0154759		0.00705858	-0.0413169	0.0153353	0.0574888	-0.0269779	0.0142017	0.122585		-0.0262902	0.00484902	5.90147e-08	-0.0100475	0.00450596	0.0257593	RP3-418C23.2, RP1-104O17.1
6	p22.1	rs201951562	26734973:27734973	SSE	1.57085e-06	-0.0214601	0.00446881	0.000157817	-0.0157168	0.00415951	0.00496027		0.0951521	-0.0164345	0.00984766	0.00411641	-0.0260637	0.00908379	0.10215		-0.0206019	0.00406941	4.13505e-07	-0.0175103	0.00378188	3.6559e-06	PRSS16, XXbac-BPGBPG24O18.1
2	q32.3	rs6746594	193401364:194401364	CED	1.57447e-06	0.0169086	0.00352136	0.0204472	0.00757892	0.00326951	0.00483421		0.374155	-0.00860825	0.00968602	0.00986562	-0.0228599	0.0088583	0.0241841		0.0139298	0.00330944	2.56391e-05	0.00392947	0.00306726	0.200157	PCGEM1, AC092638.1
1	p31.1	rs2821266	72035285:73035285	AED	1.59157e-06	-0.0168197	0.00350443	0.0218066	-0.00750136	0.00327036	0.0018644		0.392381	0.00742983	0.00868663	0.00172348	0.0250821	0.00800228	0.0011079		-0.0134254	0.00324993	3.61199e-05	-0.00283817	0.00302731	0.34849	NEGR1	RPL31P12, NEGR1
18	q12.3	rs2161796	40250455:41250455	CED	1.72632e-06	-0.0171572	0.00358692	1.83223e-10	-0.0212812	0.00333816	0.0475065	SSE_Female	0.392512	-0.00695066	0.00812864	5.25824e-05	-0.0301727	0.00746061	0.0100363		-0.0154937	0.00328162	2.3428e-06	-0.0227644	0.00304705	7.96249e-14	RIT2, SYT4
16	q22.2	rs11864188	71532954:72532954	CED	1.73941e-06	-0.0176633	0.00369392	0.0190231	-0.00807613	0.00344384	0.0310051		0.481407	-0.00541761	0.00769493	5.68517e-06	-0.0322622	0.00710875	0.00224041		-0.0153699	0.00333009	3.92257e-06	-0.0126735	0.0030993	4.3298e-05	PKD1L3	HP, DHX38, DHODH, HPR
9	p22.3	rs7870380	16063730:17063730	CED	1.88771e-06	-0.0340291	0.00714108	0.00618293	-0.0182095	0.00665077	0.104993		0.232752	-0.0167191	0.0140106	0.0303015	-0.0278614	0.0128619	0.0137937		-0.0304595	0.00636232	1.68882e-06	-0.0202458	0.00590769	0.000610245	BNC2	TCF7L1
5	q23.3	rs7703313	127328980:128328980	CED	1.98065e-06	-0.0268974	0.005656	0.0364754	-0.0110389	0.00527772	0.00736854		0.350128	0.00740839	0.00792889	0.0104089	0.0187519	0.00731909	0.022835		-0.0153279	0.00460453	0.000871975	-0.000847694	0.00428084	0.843029	FBN2	FBN2
12	q21.33	rs12427047	89713070:90713070	CED	1.99841e-06	-0.0192095	0.00404091	4.01442e-08	-0.0205903	0.0037502	0.0641468	AED	0.132256	-0.0128912	0.00856383	0.0025352	-0.0236179	0.00782233	0.0196613		-0.0180589	0.0036545	7.7503e-07	-0.0211561	0.00338165	3.946e-10	RNU6-148P, RP11-654D12.2	POC1B
11	p11.2	rs11039204	46886552:47886552	CED	2.00965e-06	0.0533488	0.0112251	0.0436358	0.0211018	0.0104589	0.0339414		0.00761884	0.0760801	0.0285086	0.57951	-0.0144042	0.0259954	0.00950585		0.0563999	0.0104446	6.66782e-08	0.016155	0.00970301	0.0959225	SPI1
1	q22	rs72706148	155241305:156241305	CED	2.23142e-06	-0.066753	0.0141084	0.168752	-0.0180878	0.013143	0.0116061		0.000985502	-0.115555	0.0350706	0.181241	-0.0439244	0.0328538	0.0680353		-0.0735507	0.013089	1.91749e-08	-0.0216522	0.0122028	0.0760031	GON4L	ADAM15, GLMP, GBAP1, SMG5, THBS3
4	p15.31	rs11938781	17424734:18424734	AED	2.26393e-06	-0.0521846	0.0110362	0.769581	0.00300572	0.0102611	0.000160255		0.351146	-0.0228338	0.0244898	0.0336721	-0.0481488	0.0226684	0.0957542		-0.0472302	0.0100617	2.67854e-06	-0.00569346	0.00934799	0.542486	LCORL	LAP3, LCORL, DCAF16
19	p13.3	rs77233515	4772060:5772060	CED	2.27246e-06	-0.0322804	0.00682789	0.205182	-0.00806819	0.0063683	0.00687898		0.0546577	-0.0229916	0.0119645	0.289225	-0.0116964	0.0110361	0.0300946		-0.0299984	0.00593018	4.22336e-07	-0.00897452	0.00551584	0.103728	PTPRS	ARRDC5, KDM4B
19	p13.11	rs113230003	17960956:18960956	CED	2.30937e-06	-0.0186597	0.00394961	8.7771e-08	-0.0196609	0.00367454	0.412565		0.674562	-0.00367531	0.00875285	0.000490972	-0.0279927	0.00803022	0.0156023		-0.0161248	0.00360007	7.49834e-06	-0.0211034	0.00334134	2.68655e-10	PGPEP1	PGPEP1
1	p36.32	rs3762444	1927712:2927712	CED	2.37162e-06	-0.0165482	0.00350669	0.017636	-0.00773103	0.00325765	0.00379188		0.0711921	-0.0140791	0.00780306	0.010388	-0.0183501	0.00716027	0.0330002		-0.0161333	0.00319854	4.55997e-07	-0.00955213	0.00296519	0.00127557	PLCH2	MMEL1, PRXL2B, PANK4, TTC34, TNFRSF14, AP2A2, PLCH2, AL139246.2
11	p11.2	rs181678666	45850248:46850248	OED	2.52015e-06	0.050073	0.0106388	0.483225	0.00698129	0.00995725	0.00310403		0.0340492	0.0954822	0.0450477	0.292804	-0.0424205	0.0403235	0.0112762		0.0524719	0.010354	4.0243e-07	0.00414207	0.00966688	0.668302	CREB3L1, DGKZ
17	q21.32	rs11079849	46590785:47590785	AED	2.53648e-06	-0.0174921	0.00371751	0.000943428	-0.0114481	0.00346185	0.0424311		0.386667	-0.00728672	0.00841726	0.0555401	-0.0147548	0.00770615	0.0318626		-0.0158264	0.00340062	3.25602e-06	-0.0120034	0.00315784	0.000144038	RP11-501C14.6	SNF8, CALCOCO2, IGF2BP1, GIP, HOXB2, UBE2Z, ATP5MC1
3	p21.31	rs13086611	48885417:49885417	CED	2.55481e-06	0.0164306	0.003493	1.45323e-07	0.017085	0.00324896	0.0113899		0.0179073	0.0182243	0.0076972	0.457736	0.00521831	0.00702721	0.0222784		0.0167369	0.0031808	1.42611e-07	0.0149951	0.00294902	3.6806e-07	USP4, GPX1	APEH, COL7A1, GMPPB, NICN1, CRBN, INKA1, IP6K1, HYAL3, BSN, USP4, QRICH1, ATRIP, GPX1, DCUN1D1, RBM6, WDR6, IP6K2, TREX1, KLHDC8B, SHISA5, WDR53, DAG1, AMT, UBA7, MAP3K13, SLC26A6
2	q24.3	rs6717858	165039661:166039661	CED	2.69e-06	0.0166003	0.00353699	1.8592e-15	0.0261826	0.00329297	0.00149771		0.67409	0.00492724	0.0117163	0.0210511	0.0251302	0.0108923	0.0935185		0.0156253	0.00338606	3.93843e-06	0.0260945	0.00315207	1.24725e-16	COBLL1	SLC38A11
6	p21.31	rs147099358	33983765:34983765	CED	2.7011e-06	0.0586823	0.0125056	6.38131e-17	0.0986032	0.0117964	0.00630531		0.091311	0.0355118	0.0210307	0.00255203	0.0589601	0.0195408	0.0605918		0.0526296	0.0107488	9.76509e-07	0.0880148	0.0100989	2.90016e-18	PACSIN1	UHRF1BP1, DEF6
5	p15.33	rs141134342	1740531:2740531	OED	2.7035e-06	0.0813733	0.0173418	0.147712	-0.0232742	0.0160771	9.63164e-06		0.0292677	0.0778131	0.0356948	0.443476	-0.0261535	0.0341277	0.0176347		0.0806934	0.0155983	2.30113e-07	-0.0237971	0.0145441	0.101796	Y_RNA, RP11-129I19.2
3	p22.3	rs13062093	35167057:36167057	CED	2.77601e-06	0.0168512	0.00359539	0.000111443	0.0129278	0.00334545	0.0126718		0.00233971	-0.0238345	0.00783109	0.0353061	-0.0152279	0.00723448	0.0252151		0.00976814	0.00326747	0.00279425	0.00796761	0.0030365	0.00869179	RNU6-243P, ARPP21	ARPP21
6	p22.1	rs9357034	26743425:27743425	CED	2.9834e-06	-0.028239	0.00604414	3.71873e-13	-0.0407021	0.00560177	0.0125336	SSE_Female	0.230485	-0.0149422	0.0124609	0.000262521	-0.0421716	0.0115537	0.0125965		-0.0257065	0.00543818	2.27817e-06	-0.0409818	0.00504056	4.27834e-16	XXbac-BPGBPG24O18.1, POM121L2	ZNF204P, ZNF322, ZSCAN12P1, BTN3A2, HIST1H4H, HIST1H2BJ, BTN2A2, ZKSCAN4, ABT1, HIST1H2BK, ZSCAN16, BTN3A1, ZSCAN9, HIST1H4C, HCG11, FAM222B
20	q13.13	rs71351952	47023789:48023789	AED	2.99519e-06	-0.0174878	0.00374365	0.215267	-0.00433089	0.00349486	0.00402795		5.92796e-05	-0.0360394	0.00897355	0.00871663	-0.0216733	0.00826247	0.00483546		-0.020238	0.00345504	4.69823e-09	-0.00696278	0.00321876	0.030527	PREX1, ARFGEF2	ZNFX1, ARFGEF2, PREX1, CSE1L, ZFAS1, KCNB1
13	q14.3	rs9568867	53607352:54607352	SSE	3.17211e-06	0.0243007	0.0052153	7.70718e-11	0.0316128	0.00485859	0.00124007	AED	0.00855607	0.0300296	0.0114204	8.5213e-05	0.0417078	0.0106137	0.0352294		0.0252893	0.00474404	9.78102e-08	0.0333617	0.00441772	4.29311e-14	AL450423.1, LINC00558
12	q24.31	rs181617194	121511598:122511598	CED	3.31209e-06	-0.0365506	0.00785932	4.25023e-06	-0.0334558	0.00727476	0.581245		0.889862	-0.00828891	0.0598563	0.00585669	-0.146229	0.0530613	0.0423103		-0.0360716	0.00779243	3.67337e-06	-0.0355365	0.00720734	8.19802e-07	KDM2B	MORN3
13	q31.1	rs1576655	79087841:80087841	CED	3.69765e-06	-0.0161921	0.00349884	0.000271111	-0.011836	0.0032503	0.119745		0.27363	0.0101491	0.00927058	0.0105832	0.0218248	0.00853769	0.0267896		-0.0129078	0.00327346	8.0408e-05	-0.00757501	0.00303762	0.0126408	CCT5P2, NIPA2P5
6	q14.1	rs2874881	80768676:81768676	OED	3.85817e-06	-0.0259121	0.00560985	0.00427113	0.0148833	0.00520862	9.86473e-08		0.295903	-0.020386	0.0195029	0.00125714	0.0584463	0.0181183	0.00153137		-0.0254898	0.00539125	2.26746e-06	0.0182087	0.00500587	0.000275334	RP11-486E2.1, FAM46A
11	p11.2	rs113618854	47512563:48512563	CED	4.2292e-06	0.0488039	0.0106097	0.0672418	0.0180357	0.00985521	0.0336057		0.0747785	0.0417269	0.0234174	0.335547	-0.0207324	0.0215288	0.0247927		0.0475986	0.00966408	8.42266e-07	0.0113192	0.00896094	0.206527	PTPRJ	ACP2, MYBPC3, C1QTNF4, NR1H3, SPI1, PSMC3, PTPRJ
10	q23.33	rs2077218	95571561:96571561	CED	4.36572e-06	0.0187345	0.00407864	0.504052	0.0025266	0.00378161	0.00242698		0.62607	-0.00826059	0.0169528	0.00143683	-0.0483707	0.0151758	0.00642891		0.0172575	0.00396549	1.34956e-05	-0.000449051	0.0036694	0.9026	PLCE1	NOC3L, TBC1D12, HELLS
2	p16.1	rs4671328	58435282:59435282	CED	4.37072e-06	-0.0161676	0.00352	6.47296e-13	-0.0234957	0.00326755	0.0139983		0.000440923	0.02798	0.00796095	0.566334	0.0041975	0.00731956	0.00673924		-0.00894803	0.00321934	0.00544498	-0.0188939	0.00298374	2.41541e-10	LINC01122
12	q24.31	rs144713920	121985389:122985389	AED	4.48034e-06	-0.0357113	0.00778378	5.61708e-11	-0.0474669	0.00724248	0.141218		0.320501	0.0751314	0.0756272	0.0364002	-0.152488	0.0728739	0.0151058		-0.0345494	0.00774288	8.11632e-06	-0.0484941	0.00720698	1.71106e-11	BCL7A	HCAR3, MLXIP
1	p21.3	rs4255425	95778606:96778606	CED	4.99041e-06	0.0168566	0.00369229	0.00414253	0.00985862	0.00343849	0.0226072		0.0210761	-0.0355814	0.015425	0.347443	-0.0135282	0.0143983	0.0444004		0.0140148	0.00359085	9.50358e-05	0.0085968	0.00334444	0.010156	RP11-286B14.1, AC092812.1
2	q24.1	rs78542747	156138349:157138349	CED	5.00896e-06	-0.0163638	0.00358496	0.350865	-0.00310278	0.0033259	0.000353307		0.00801444	-0.0250117	0.00943258	0.826097	0.0019291	0.00878018	0.00765296		-0.0174553	0.00335109	1.90028e-07	-0.00247137	0.00311024	0.426851	RNU6-546P, AC093375.1	GPD2
14	q32.2	rs3994992	99179507:100179507	CED	5.29141e-06	-0.0159704	0.00350764	0.000386432	-0.0115966	0.00326734	0.225281		0.000617371	0.0274756	0.00802393	0.516431	0.00479709	0.00739308	0.0188281		-0.00899999	0.00321397	0.00510589	-0.00891785	0.0029885	0.00284453	BCL11B	BCL11B
17	q12	rs2306593	34366546:35366546	CED	5.35328e-06	-0.015802	0.00347251	8.38505e-08	-0.017304	0.00322905	0.0948469		0.113959	-0.0122376	0.00774197	0.000956399	-0.0234567	0.00710102	0.0788165		-0.015205	0.0031684	1.5949e-06	-0.0183583	0.00293941	4.22313e-10	MYO19	ZNHIT3, DHRS11, MRM1, PIGW, GGNBP2, MYO19
17	q11.2	rs2729455	27565573:28565573	CED	5.56672e-06	0.0210065	0.00462458	3.35318e-05	0.0178073	0.00429283	0.00892191		6.37944e-05	0.0352144	0.00880616	0.0108637	0.0206468	0.0081058	0.00127313		0.0240778	0.00409434	4.08385e-09	0.0184293	0.00379366	1.18627e-06	SSH2	BLMH, EFCAB5, NSRP1, ABHD15, CPD, GIT1, GOSR1, ANKRD13B, TP53I13, CORO6, SSH2
10	q26.3	rs2172131	133478962:134478962	CED	5.69117e-06	-0.01592	0.00350839	1.56085e-05	-0.0141359	0.00327218	0.0447653		0.861945	0.00140805	0.00809692	0.00426994	0.0212867	0.007449	0.00374237		-0.0131809	0.00321918	4.23082e-05	-0.00840621	0.00299587	0.00501716	JAKMIP3	DPYSL4, JAKMIP3
9	q31.1	rs150688270	102936617:103936617	CED	5.81072e-06	0.0422258	0.00931457	0.398349	-0.00726929	0.00860703	8.9557e-05		0.750481	0.0249263	0.0783828	0.00396094	0.199907	0.0693782	0.0269622		0.0419849	0.00924949	5.64791e-06	-0.00412902	0.00854155	0.628809	MURC, RP11-394D2.1	INVS
7	q11.23	rs77773460	76283917:77283917	AED	5.95277e-06	0.0218422	0.00482358	0.24697	0.00518258	0.00447644	0.00412673		0.73336	0.00280094	0.00822204	0.00711667	0.0203108	0.00754634	0.0144148		0.0169667	0.00416046	4.54091e-05	0.00912028	0.00385003	0.0178417	CCDC146	CCDC146
17	q23.3	rs7210550	61285248:62285248	OED	6.02479e-06	-0.0346587	0.00765826	0.975921	0.000215191	0.00712942	0.00085909		0.00624912	0.0229418	0.00838946	0.688379	0.00307932	0.00767798	0.013467		-0.00847753	0.00565608	0.133916	0.0015413	0.00522444	0.767981	RP11-51F16.8	PSMC5, SMARCD2, GH2, CCDC47, DDX42, CSHL1, MAP3K3, STRADA, LIMD2, FTSJ3
3	p11.1	rs13062221	89278009:90278009	CED	6.22701e-06	-0.0158477	0.00350716	2.69219e-07	-0.0168204	0.00326991	0.127296		2.12415e-05	-0.0327504	0.00770227	0.0573011	-0.0134496	0.00707481	0.00495237		-0.0187504	0.00319184	4.24191e-09	-0.0162271	0.00296821	4.57821e-08	RP11-91A15.1, U3
16	p12.1	rs7185291	24214679:25214679	CED	6.37353e-06	0.0162854	0.00360795	6.06029e-12	0.0230664	0.00335333	0.091348	SSE_Female	0.0291448	-0.0181042	0.00829851	0.00010404	-0.0297868	0.00767434	0.000133223		0.0108183	0.00330876	0.00107701	0.014593	0.00307279	2.04316e-06	AC012317.1, TNRC6A	SLC5A11, TNRC6A
8	p12	rs10954772	30363938:31363938	CED	6.46333e-06	-0.0169142	0.00374973	2.18869e-08	-0.0195952	0.00350126	0.00385894		0.000418144	0.027453	0.00777987	0.597808	-0.00376583	0.00713821	0.00154923		-0.00855048	0.00337786	0.011363	-0.0165254	0.00314348	1.46389e-07	PURG	PURG, GSR
12	q14.3	rs1351394	65851826:66851826	CED	6.67003e-06	-0.0158861	0.00352704	1.84158e-08	-0.0184492	0.00327899	0.0200815	SSE_Female	0.238745	-0.00913448	0.00775322	2.2353e-07	-0.0367935	0.00710369	0.003688		-0.0147285	0.00321045	4.48257e-06	-0.0216712	0.00297713	3.3573e-13	HMGA2	HMGA2
1	q22	rs72704117	154675089:155675089	AED	6.81736e-06	-0.0517782	0.0115077	0.0165076	-0.0256923	0.0107162	0.00243926		0.00358096	-0.0358041	0.0122907	0.0514275	-0.0222213	0.0114075	0.0725772		-0.0443162	0.00840035	1.32386e-07	-0.0240652	0.00781046	0.00206207	RP11-263K19.4	PMF1, ADAM15, GBAP1, EFNA3, THBS3
19	p13.3	rs7246182	4647735:5647735	CED	6.88676e-06	-0.0188004	0.00418038	0.0293568	-0.0084896	0.00389667	0.0364676		0.0061576	-0.039992	0.0145986	0.683059	-0.00544389	0.0133332	0.040283		-0.0204064	0.00401885	3.821e-07	-0.00824993	0.00374021	0.0274023	KDM4B	KDM4B
16	q12.2	rs74498370	53292464:54292464	SSE	7.33895e-06	0.0409886	0.00914158	0.0895032	0.0145365	0.00856076	0.0105535		0.943869	-0.00171732	0.0243907	0.0259053	0.0499283	0.0224124	0.0594811		0.0357285	0.0085601	2.9951e-05	0.0190426	0.00799723	0.0172584	FTO	RBL2
1	p13.2	rs12406530	112617213:113617213	CED	7.52714e-06	-0.0192197	0.0042917	1.82136e-08	-0.0224443	0.00398768	0.0193171		0.0100622	-0.0390252	0.0151623	0.947246	-0.000927056	0.014011	0.0288595		-0.0206888	0.00412947	5.44196e-07	-0.0208319	0.00383537	5.58701e-08	ST7L	MOV10, ST7L, WNT2B
13	q14.3	rs7982447	53953811:54953811	CED	8.34147e-06	0.0191316	0.00429309	3.91723e-09	0.0235378	0.00399763	0.12123		0.0238458	0.0242774	0.0107436	0.0889552	0.0169068	0.00993949	0.0147031		0.0198401	0.00398659	6.46722e-07	0.0226145	0.00370889	1.07822e-09	LINC00558, LINC00458
6	p22.1	rs2248162	29415061:30415061	CED	8.42164e-06	-0.0160488	0.00360297	1.0454e-09	-0.0204983	0.00335893	0.0284021		0.352825	-0.0138182	0.0148721	0.000248408	-0.0495323	0.0135178	0.0103894		-0.0159251	0.00350168	5.41934e-06	-0.0221867	0.0032598	1.00244e-11	HLA-A, HLA-W	TSSC4, DDR1, MICE, AL645929.1, HLA-U, BTN1A1, LINC00243, HLA-J, TPD52L2, HLA-H, ZNRD1ASP, HLA-G, HCG4, IFITM4P, HLA-A, BTN3A2, KIT, ZNRD1, KRTCAP2, HCG4B, HLA-C, HLA-V, ZFP57, HLA-W, FLOT1, HLA-F-AS1, TRIM26, HLA-L, HLA-F, MICD, VARS2, PPP1R11, B2M, HCG4P6
6	p22.3	rs55933147	20200600:21200600	AED	8.48916e-06	-0.0199142	0.00447249	0.0185173	-0.00979589	0.00415939	0.00925904		0.0114295	-0.0205686	0.00813172	0.861934	0.00130841	0.00752331	0.00135355		-0.0200662	0.00391886	3.04862e-07	-0.00719632	0.00364011	0.0480471	CDKAL1
11	q13.2	rs12785906	66451966:67451966	CED	8.55034e-06	-0.0331902	0.00745669	1.34973e-15	-0.0550276	0.0068865	0.0256745	SSE_Female	0.00248442	-0.0433911	0.014342	1.21499e-06	-0.0642375	0.0132342	0.021885		-0.0353609	0.00661592	9.05064e-08	-0.05699	0.00610893	1.06903e-20	KDM2A	LRFN4, CTSF, CARNS1, RAD9A, DOC2GP, CCS
3	p25.2	rs9875338	11796469:12796469	AED	8.67996e-06	0.0157352	0.00353772	0.0196117	0.00768047	0.00329109	0.0121929		0.0753633	-0.0137995	0.0077599	1.8888e-05	-0.0304762	0.00712369	0.00371359		0.0106529	0.00321898	0.000934912	0.000968921	0.00298766	0.745705	SYN2, GSTM5P1	MKRN2, PPARG, TSEN2, SYN2, CAND2
19	q13.32	rs429358	44911941:45911941	CED	9.80347e-06	-0.02035	0.0046024	5.21616e-10	-0.0266267	0.0042858	0.0300892	SSE_Female	0.587795	0.00419032	0.00773065	0.000791922	0.0237872	0.00708827	0.00052352		-0.0139282	0.00395462	0.000428311	-0.0131304	0.00366753	0.000343375	APOE	APOC1, APOE
6	p21.31	rs12201824	34083020:35083020	CED	1.01694e-05	-0.0163386	0.00370182	5.9823e-10	-0.0213467	0.0034479	0.0398615		0.0774924	0.0142485	0.00807059	0.000321818	0.0265066	0.0073683	0.0486483		-0.011022	0.00336475	0.00105391	-0.0127507	0.00312291	4.44647e-05	C6orf106	PACSIN1, UHRF1BP1, SNRPC, DEF6, TULP1, RPL10A, TCP11, C6orf106
12	q24.31	rs11058603	122516781:123516781	CED	1.01927e-05	0.0159731	0.0036194	1.22147e-11	0.022887	0.00337663	0.0235624		0.483635	-0.00657533	0.00938694	8.30504e-08	-0.0465624	0.00868482	0.000130902		0.0130547	0.00337706	0.000110772	0.0137674	0.00314713	1.21668e-05	KNTC1	RSRC2, KNTC1
11	p11.2	rs12146571	47814077:48814077	OED	1.03137e-05	-0.0204072	0.00462682	0.00109417	-0.0141065	0.00432029	0.00013993		0.044801	-0.0306524	0.0152758	0.00135952	-0.0448452	0.0139995	0.083806		-0.0212681	0.00442816	1.56364e-06	-0.0167794	0.00412818	4.8117e-05	OR4X1, OR4S1	PTPRJ, MADD, C1QTNF4, SPI1, FNBP4
5	q23.2	rs1582931	122157199:123157199	AED	1.04114e-05	-0.0154476	0.00350397	4.17408e-07	-0.0165251	0.00326517	0.00461284		0.00180218	-0.0241178	0.00772687	0.243227	-0.00829884	0.00711141	0.0434619		-0.0169264	0.00319118	1.13207e-07	-0.0150928	0.00296734	3.65079e-07	CTD-2347I17.1, CEP120	CEP120
4	q22.1	rs57400569	89252276:90252276	AED	1.08793e-05	0.0186122	0.00423095	0.0237161	0.0089195	0.00394369	0.0131313		0.00206631	0.0599287	0.0194525	0.197715	0.0229284	0.0178	0.0269396		0.0204785	0.00413429	7.29569e-07	0.00957498	0.00385032	0.0128898	FAM13A	FAM13A
6	p21.33	rs644045	31383957:32383957	AED	1.09544e-05	-0.0251321	0.00571502	7.56397e-11	-0.0347863	0.00534402	0.00169487		0.314156	-0.0132603	0.0131739	1.40911e-05	-0.0528136	0.0121608	0.00536721		-0.0232518	0.00524293	9.21236e-06	-0.0377041	0.00489246	1.29233e-14	C2	FAM8A1, ATF6B, HLA-DQA1, STK19B, ATP6V1G2, HLA-DRB5, HLA-S, GALNT2, TCF19, HLA-DQB1-AS1, HSPA1B, HCG27, AIF1, POU5F1, HLA-C, HCP5, LTA, TNXA, CSNK2B, LY6G5B, CYP21A1P, PSORS1C3, SLC44A4, PRRT1, TNXB, HLA-DQB1, BAG6, HLA-DRA, DDAH2, HLA-DRB1, TMEM154, C4B, HLA-DQB2, DXO, TSBP1, PRRC2A, HLA-DQA2, CYP21A2, PBX2, NCR3, NOTCH4, LY6G5C, VARS2, HLA-B, TAP2, SKIV2L, HLA-DRB6
11	p11.2	rs11039154	46778502:47778502	AED	1.10182e-05	-0.0155733	0.00354236	1.76411e-07	-0.0172214	0.00329734	0.0366689		0.0229991	-0.0246708	0.0108512	0.00210091	-0.0310516	0.0100955	0.00297347		-0.0164494	0.00336747	1.03529e-06	-0.0185546	0.00313439	3.22596e-09	NR1H3	ARHGAP1, NUP160, MYBPC3, ACP2, C1QTNF4, MADD, MTCH2, PSMC3, SPI1, AC090559.1, FNBP4
7	q31.32	rs10237306	121455981:122455981	CED	1.17468e-05	0.0156146	0.00356304	3.43755e-08	0.0183371	0.00332328	0.0465599		0.000197743	0.0345181	0.00927331	0.50075	-0.00574057	0.00852581	0.000696976		0.0180463	0.00332598	5.76762e-08	0.0151613	0.00309637	9.7564e-07	FEZF1, CADPS2	CADPS2
6	q12	rs208490	66427774:67427774	CED	1.19996e-05	0.0194549	0.00444406	5.19635e-05	0.0167197	0.00413167	0.108888		0.0511788	-0.0155691	0.00798396	0.278704	0.00792544	0.00731635	0.00500967		0.0111703	0.00388305	0.00401892	0.0145933	0.00359765	4.98477e-05	NUFIP1P, AC002485.1	GPALPP1
11	p14.1	rs7942129	29724692:30724692	AED	1.25645e-05	-0.0179649	0.00411313	5.41305e-06	-0.0174305	0.00383236	0.0193072		0.0126415	-0.0389102	0.0156024	0.789167	-0.0037649	0.01408	0.0136684		-0.0193259	0.00397725	1.17908e-06	-0.0164879	0.00369783	8.24165e-06	RP4-562D20.2, FSHB	ARL14EP, RPL12P30, AC124657.1, FSHB
6	p12.3	rs1492612	49846543:50846543	CED	1.26169e-05	-0.0230315	0.00527425	1.81951e-07	-0.0257011	0.00492634	0.00989801		0.277249	-0.0238856	0.0219832	0.00948559	0.0527188	0.0203221	0.00525143		-0.023078	0.0051287	6.80272e-06	-0.0213486	0.00478768	8.23147e-06	RP11-397G17.1, RP11-524K22.1
6	p22.1	rs13215804	27915572:28915572	CED	1.26581e-05	0.015691	0.00359385	3.59567e-10	0.0209995	0.00334869	0.110193		0.0793351	-0.0348257	0.0198481	0.00939699	-0.0472533	0.0181927	0.00661432		0.0140874	0.00353635	6.78817e-05	0.0187628	0.00329336	1.21821e-08	COX11P1	BTN1A1, HLA-J, ZKSCAN4, HIST1H4L, HLA-H, HLA-G, TRIM27, HLA-A, BTN3A2, ZSCAN12, HIST1H4K, ZNF603P, GUSBP2, FBRSL1, ZKSCAN3, ZSCAN16, HIST1H3I, PGBD1, VARS2, ZSCAN9, ZSCAN31, ZSCAN23
7	q22.1	rs574637649	98525328:99525328	CED	1.3135e-05	-0.0316808	0.00726961	0.02243	-0.0155301	0.00680243	0.00175187		0.456879	-0.0580859	0.0780719	0.0167624	-0.162577	0.0679676	0.0238313		-0.0319078	0.0072383	1.0424e-05	-0.0169884	0.00676861	0.0120772	ATP5J2-PTCD1
5	p14.3	rs111666612	21977433:22977433	OED	1.33412e-05	-0.0187797	0.00431265	0.218893	0.00493678	0.00401534	2.12635e-06		0.0461354	-0.0157006	0.007873	0.29957	-0.00743506	0.00716723	0.00431557		-0.018069	0.00378236	1.77764e-06	0.00198132	0.00350306	0.571668	CDH12
2	q36.3	rs12615115	228517931:229517931	CED	1.38501e-05	0.0330955	0.00761453	0.744075	0.00229401	0.00702688	0.00295172		0.0164397	0.0182081	0.00758946	0.000323262	0.0251335	0.0069889	0.00506678		0.0256273	0.0053754	1.86521e-06	0.0137756	0.00495527	0.00543593	SPHKAP
16	q24.3	rs55637757	89035888:90035888	AED	1.42413e-05	-0.0224528	0.00517316	2.34147e-08	-0.0269524	0.00482594	0.0715296		0.00243558	0.0236462	0.00780021	0.640528	0.00334921	0.0071723	0.00850647		-0.00837045	0.0043112	0.0521904	-0.0175091	0.00400395	1.22578e-05	ANKRD11	SPATA2L, DBNDD1, ZNF276, SPG7, VPS9D1, RPL13, CDH15, GAS8, MC1R, ANKRD11, TCF25
6	p21.33	rs3130048	31113739:32113739	CED	1.49612e-05	0.0166699	0.00385041	2.54848e-15	0.0283201	0.00357943	0.000664937	SSE_Female	0.37487	0.0097653	0.0110044	0.000561533	0.0348398	0.010099	0.00254534		0.0159168	0.00363436	1.18935e-05	0.0290477	0.00337378	7.31664e-18	BAG6	LINC00243, HLA-DQA1, HLA-H, HLA-G, RNF5, C2, CCHCR1, DDX39B, HLA-DRB5, BTN3A2, HSPA1B, HCG27, GPANK1, HLA-C, HCP5, C4A, TNXA, IER3, CYP21A1P, SLC44A4, TNXB, FLOT1, MICB, HLA-DQB1, BAG6, DDAH2, HLA-DRB1, C4B, DXO, PRRC2A, TSBP1, PPT2, CYP21A2, PBX2, LY6G5C, VARS2, HLA-B, HLA-DPB1, SKIV2L, APOM, HLA-DRB6, AGER
6	p21.33	rs7769158	31299494:32299494	CED	1.56467e-05	-0.024342	0.00563536	1.74311e-11	-0.0354194	0.00526567	0.067278	CED	0.0362938	-0.0243295	0.0116203	3.81457e-05	-0.0443604	0.01077	0.00687605		-0.0243396	0.00507056	1.58519e-06	-0.0371443	0.00473054	4.09338e-15	HSPA1B, C6orf48	HLA-DRB5, VWA7, LY6G5B, PPT2, SLC44A4, GPANK1, HSPA1A, LY6G5C, SKIV2L, HLA-B, HLA-C, LY6G6F, HCP5, BAG6, HLA-DRB6, NELFE
18	q21.32	rs193239997	58139547:59139547	CED	1.68883e-05	-0.0557925	0.0129671	8.16161e-11	-0.0782967	0.0120494	0.0381506		0.029981	-0.0627289	0.0289015	0.11769	-0.041703	0.0266545	0.0146111		-0.0569548	0.0118309	1.47878e-06	-0.0720874	0.0109796	5.18379e-11	RP11-325K19.1, CDH20
7	p14.1	rs4549685	38826478:39826478	CED	1.82023e-05	-0.0158163	0.00369024	1.57463e-05	-0.0147973	0.00342682	0.0942208		0.00398714	-0.021884	0.00760023	0.111975	-0.0111175	0.00699472	0.00272187		-0.0169739	0.00331962	3.16761e-07	-0.014085	0.00307735	4.71699e-06	POU6F2	POU6F2
15	q25.2	rs11073859	84583041:85583041	CED	1.86093e-05	-0.0181162	0.00423169	5.79395e-13	-0.0284284	0.00394524	0.00902831	AED	0.0645213	0.0154801	0.00837383	4.19891e-08	0.0420222	0.00766364	0.008971		-0.0112819	0.00377683	0.00281615	-0.0136691	0.00350772	9.74419e-05	UBE2Q2P1	UBE2Q2P1, GOLGA6L4, CSPG4P11, ADAMTSL3, GOLGA6L3, GOLGA2P7, SCAND2P, GOLGA6L5P, NMB
6	p12.3	rs2474896	51260527:52260527	CED	1.94622e-05	0.0157489	0.00368732	1.06879e-08	0.0195821	0.00342364	0.173125		0.000710743	0.0279144	0.00824475	0.587015	0.00411079	0.00756812	0.0156289		0.0177766	0.00336602	1.28344e-07	0.0169538	0.00311931	5.47584e-08	PKHD1
12	q21.33	rs704061	89271903:90271903	AED	1.96709e-05	0.0149583	0.00350417	1.35762e-12	0.0232082	0.00327393	0.0852333	SSE_Female	0.903161	0.000932848	0.00766704	8.39742e-05	0.0276092	0.0070196	0.00491797		0.0125348	0.00318707	8.38891e-05	0.0239945	0.00296709	6.12065e-16	RP11-1109F11.5, POC1B	POC1B
3	q25.31	rs13322435	156295468:157295468	OED	2.01618e-05	-0.0151672	0.00355768	0.820893	0.000749902	0.00331233	0.000818662		0.14364	0.0140049	0.00957663	0.179727	-0.0117519	0.00875953	0.0235958		-0.0116294	0.00333499	0.000488291	-0.000814095	0.00309822	0.792734	LEKR1, LINC00880	TIPARP, AC092944.1
2	q13	rs4567941	112309219:113309219	AED	2.04594e-05	0.0162855	0.00382293	0.439854	0.00275803	0.00357054	0.00607149		0.468774	-0.00629107	0.00868352	0.00391805	-0.022982	0.00796644	0.0173301		0.0126201	0.00349886	0.000309853	-0.00154771	0.00325825	0.634777	MERTK, TMEM87B	TMEM87B, MERTK
1	p21.3	rs61787785	97832523:98832523	CED	2.06322e-05	0.0176715	0.00415013	7.86934e-08	0.0207972	0.00387263	0.0305243		0.778201	-0.00260239	0.00923927	1.58245e-05	0.0367541	0.00851303	0.000707583		0.0142677	0.00378575	0.000164041	0.0235331	0.00352503	2.45543e-11	DPYD	DPYD
8	q12.1	rs66954327	59325133:60325133	CED	2.12545e-05	0.0156518	0.00368155	0.000696335	0.0116005	0.00342091	0.0387924		0.934034	-0.000656247	0.00792848	0.00979092	0.0188453	0.00729522	0.0272067		0.0127592	0.00333912	0.000132844	0.0129064	0.00309729	3.08626e-05	TOX	TOX
16	p13.3	rs116353685	1678425:2678425	CED	2.18366e-05	-0.0197122	0.00464323	1.60823e-11	-0.0292169	0.00433602	0.00185338		0.0340686	-0.0195964	0.00924642	0.000154539	-0.0321601	0.00849896	0.0334711		-0.0196889	0.00414943	2.08549e-06	-0.0298248	0.0038624	1.14672e-14	PKD1	MIDN, RAB26, MLST8, TRAF7, PKD1, PKDCC
9	q33.3	rs7027304	128908290:129908290	CED	2.31311e-05	0.0154395	0.00364791	3.36574e-05	0.0141416	0.00340983	0.158293		0.0151157	0.0191099	0.00786506	0.0186792	0.0170255	0.00723885	0.0646239		0.0160893	0.00330929	1.16285e-06	0.0146653	0.00308473	1.99282e-06	LMX1B	LMX1B
12	q23.3	rs3764002	108118630:109118630	CED	2.81305e-05	-0.0166889	0.00398473	3.39156e-06	-0.0172465	0.00371236	0.0798438		0.00408722	-0.0236769	0.00824533	0.00939363	-0.0198277	0.00763336	0.0284718		-0.018012	0.00358773	5.15573e-07	-0.0177402	0.00333849	1.07329e-07	WSCD2
8	p23.1	rs13272451	8386183:9386183	CED	2.93451e-05	-0.0156607	0.00374783	0.318989	-0.00347846	0.00349054	0.017377		0.00451132	-0.0245675	0.00864993	0.526644	-0.00500587	0.0079064	0.0231813		-0.0170685	0.00343891	6.92904e-07	-0.0037276	0.0031932	0.243066	ERI1	TDH, FAM86B3P, NEIL2, FDFT1, FAM85B, RPL10P19, CLDN23, PRAG1, BLK, MFHAS1, AC103957.2, RP1L1, ALG1L13P, FAM66A, FAM86B1, FAM167A, ERI1, MSRA
6	p22.1	rs41269289	27727145:28727145	CED	3.00352e-05	-0.0284674	0.00682129	3.52101e-08	-0.0347757	0.0063073	0.022083	SSE_Female	0.353012	0.0127335	0.01371	0.00128815	-0.0404379	0.0125629	0.000562321		-0.020292	0.00610714	0.0008916	-0.0359156	0.00563677	1.86994e-10	NKAPL	ZNF204P, ZSCAN12P1, FAM222B, ZKSCAN4, PGBD1, ZNF311, HLA-H, ZNF192P1, ZSCAN9, ZNF771, HIST1H2BK, ZSCAN31, ZKSCAN3, ZSCAN16, ZSCAN23
7	q11.23	rs6955671	73989486:74989486	CED	3.17416e-05	0.0144719	0.00347822	2.77505e-07	0.0166335	0.00323717	0.000236422		0.625781	0.0287463	0.0589453	0.00282701	0.169122	0.056636	0.0429671		0.0145214	0.00347218	2.88674e-05	0.0171301	0.0032319	1.15605e-07	WBSCR16	NCF1C, RCC1L, NCF1, GTF2IRD2B, HIP1, STAG3L2, POM121C, PMS2P3, GTF2IP1, GTF2I, STAG3L1, PMS2P5
11	q25	rs12806052	134018868:135018868	CED	3.1894e-05	-0.0194775	0.00468251	6.20094e-08	-0.0234562	0.00433321	0.0152782		0.0019786	-0.0266195	0.00860448	0.554037	-0.00466102	0.00787697	0.0144952		-0.0211093	0.00411293	2.86028e-07	-0.0190897	0.00379665	4.95491e-07	AP004550.1, RP11-469N6.3
6	p22.1	rs7745768	28814964:29814964	CED	3.29758e-05	0.0187827	0.00452378	3.14661e-09	0.025019	0.0042233	0.0171527		0.331672	0.0107114	0.0110339	0.00197756	0.0312762	0.0101094	0.0215563		0.0176212	0.00418565	2.55472e-05	0.0259488	0.00389692	2.76086e-11	DDX6P1, OR5V1	HLA-J, TRIM31, HLA-H, ZNRD1ASP, HLA-G, HCG4, MOG, IFITM4P, HLA-A, TUBB, BTN3A2, RYR1, TRIM10, ZNRD1, ZFP57, GABBR1, IER3, HLA-K, AL671277.2, ZDHHC20P1, ZKSCAN3, HLA-F, VARS2, DDX39BP2, ZSCAN31
2	p21	rs2949785	46783502:47783502	CED	3.45286e-05	-0.0170862	0.00412566	0.0190721	-0.0090287	0.00385161	0.0214266		0.185705	-0.0149802	0.0113193	0.000755996	-0.0352024	0.0104499	0.0100105		-0.0168392	0.00387622	1.39755e-05	-0.0121591	0.00361395	0.000766818	C2orf61	TTC7A
2	p22.2	rs9295	36277825:37277825	CED	3.45541e-05	0.015788	0.00381233	1.43771e-13	0.02618	0.00354103	0.026265	SSE_Female	0.289214	-0.00944461	0.00891116	7.06584e-07	-0.0404295	0.00815061	0.00078437		0.0118843	0.00350504	0.000697351	0.0156039	0.00324777	1.55141e-06	AC007401.2	FEZ2, CRIM1
3	p14.3	rs59990236	55090514:56090514	CED	3.85252e-05	0.0180087	0.00437501	0.116617	0.00639419	0.00407497	0.0241947		0.00737457	0.0238029	0.008883	0.417215	-0.00666596	0.00821669	0.00421907		0.0191398	0.00392481	1.07915e-06	0.00381608	0.00365068	0.29588	ERC2	ERC2
5	q13.3	rs4704187	73980288:74980288	CED	4.19231e-05	-0.0152308	0.00371779	1.57658e-11	-0.0233008	0.00345653	0.00223035	SSE_Female	0.473391	-0.0070881	0.00988603	1.65311e-08	-0.0512964	0.00908547	0.000496437		-0.0142219	0.00347986	4.37131e-05	-0.0268405	0.00323063	9.72126e-17	ANKRD31	COL4A3BP, HMGCR, POC5, GCNT4, ANKRD31
4	q31.21	rs72718281	145508537:146508537	CED	4.29334e-05	0.0146674	0.0035851	2.0513e-11	0.0223397	0.00333293	0.050875	CED	0.369014	-0.00919721	0.0102381	9.61764e-05	-0.0368565	0.00944936	0.0235576		0.0120607	0.00338364	0.00036466	0.0157901	0.00314314	5.06984e-07	ANAPC10	OTUD4
13	q34	rs1886558	111482615:112482615	CED	4.60878e-05	-0.0145869	0.00357985	3.25865e-08	-0.0184157	0.00333184	0.0516527		0.328472	-0.00814231	0.0083322	0.00221548	-0.02342	0.00765382	0.0505405		-0.0135827	0.00328913	3.63452e-05	-0.0192129	0.00305493	3.19203e-10	TEX29	TEX29, ARHGEF7
1	q22	rs6685228	155986009:156986009	CED	4.63717e-05	0.0233201	0.0057251	0.309721	0.00543252	0.00534797	0.0224177		0.0815418	0.0158627	0.00910676	0.000506637	-0.028982	0.00833414	0.000140227		0.0212077	0.00484687	1.21136e-05	-0.00460517	0.00450098	0.306238	RP11-284F21.8, IQGAP3	GPATCH4, NAXE, TTC24
5	q34	rs1025484	166429451:167429451	AED	4.66513e-05	-0.0145802	0.00358067	0.0925312	-0.00559147	0.0033239	0.00114325		0.882702	0.00117909	0.00799131	0.0602023	0.0138439	0.00736629	0.0991963		-0.0119453	0.00326765	0.000256564	-0.00230367	0.00302974	0.447044	TENM2
6	p21.31	rs2064317	34977032:35977032	CED	4.69071e-05	0.0148744	0.00365407	5.22574e-10	0.0211944	0.00341157	0.0443125		0.0258874	-0.0172938	0.00776202	0.00424172	-0.0204106	0.00713716	0.0414366		0.00903866	0.00330605	0.00625743	0.0134563	0.00307801	1.23246e-05	TULP1	SRPK1, UHRF1BP1, DEF6, CLPS, TULP1, FKBP5, PARP4, C6orf106, TEAD3
2	q34	rs10184221	212909014:213909014	CED	4.73969e-05	-0.0160065	0.00393452	0.000392456	-0.0130021	0.00366756	0.00199688		0.309465	-0.00832451	0.0081905	0.0166071	0.0180376	0.00753011	0.0056822		-0.0145662	0.00354654	4.00573e-05	-0.00705066	0.00329726	0.0324895	ERBB4, AC079610.1	SH3GLB2, ERBB4
6	q24.2	rs765874	142685557:143685557	CED	5.08916e-05	-0.0140034	0.00345627	4.35172e-08	-0.0176751	0.00322764	0.0011748		0.0114859	-0.0193134	0.0076407	0.239935	-0.00826907	0.00703652	0.0246644		-0.0149054	0.00314907	2.20943e-06	-0.0160401	0.00293373	4.56521e-08	HIVEP2	HIVEP2
11	p15.4	rs4929923	8139200:9139200	CED	5.14166e-05	-0.0157264	0.00388383	9.45628e-09	-0.0208047	0.00362422	0.00166924	CED	0.000313614	-0.0322786	0.00895591	0.367832	-0.00739748	0.00821439	0.0175921		-0.0183465	0.0035632	2.62051e-07	-0.0186201	0.00331583	1.95976e-08	TRIM66	TRIM66, RPL27A, STK33, AKIP1
5	q14.1	rs66637616	76946603:77946603	CED	5.33519e-05	0.0146763	0.00363225	4.69068e-09	0.0197864	0.00337764	0.0333427		0.085549	0.0131596	0.00765355	0.763865	0.00211509	0.00704067	0.068633		0.0143975	0.00328146	1.14647e-05	0.0164803	0.00304534	6.24432e-08	AP3B1	AP3B1
6	p12.3	rs1325033	50468152:51468152	CED	5.45657e-05	0.01402	0.00347437	7.39671e-08	0.0174354	0.00323989	0.167075		0.307704	0.00827508	0.00811229	0.000674802	0.0253104	0.00744452	0.0538022		0.0131296	0.00319378	3.93992e-05	0.0186894	0.00297075	3.15113e-10	FTH1P5, RP3-437C15.2
1	p31.1	rs17378915	77304242:78304242	CED	5.49065e-05	0.0189048	0.00468661	4.28106e-08	0.0238684	0.00435628	0.0521606	CED	6.25232e-06	0.0362378	0.00802003	0.115081	0.0116966	0.00742269	0.0123599		0.023317	0.00404638	8.29093e-09	0.0207501	0.00375704	3.33293e-08	AK5	PIGK
1	p36.31	rs11122106	6181262:7181262	CED	5.65249e-05	0.0147517	0.00366322	0.0121451	0.00853942	0.00340497	0.0286767		0.532771	-0.00504796	0.00809244	0.00212739	0.0228039	0.00742307	0.00383085		0.0113845	0.00333722	0.000646381	0.011019	0.00309491	0.000370324	PHF13	THAP3
6	q16.3	rs314279	104902083:105902083	CED	6.34266e-05	-0.0216641	0.0054163	4.88656e-11	-0.0331469	0.00504156	0.0575827	AED	0.153244	0.0171104	0.0119804	1.01695e-05	0.0486006	0.0110103	0.0113502		-0.0150839	0.00493536	0.00224098	-0.0189779	0.00458387	3.47084e-05	LINC00577, LIN28B
14	q24.3	rs10873302	77047212:78047212	CED	6.36266e-05	0.0146323	0.00365896	3.74359e-06	0.0157529	0.00340582	0.0571167		0.00300939	-0.0276964	0.0093348	0.60866	-0.00441067	0.00861474	0.0102862		0.00899502	0.00340661	0.00827936	0.0130273	0.00316728	3.90381e-05	RP11-7F17.4	IRF2BPL, LINC02289, CIPC, AC007686.2
6	p21.31	rs6901580	34743998:35743998	CED	6.42644e-05	0.0481679	0.012052	1.61098e-15	0.0900018	0.0112943	0.0108722		0.606056	-0.0125462	0.0243277	0.0166775	0.0535173	0.0223563	0.0150474		0.0362036	0.0107994	0.000801256	0.0825835	0.0100809	2.56753e-16	ZNF76	UHRF1BP1, ZNF76, DEF6, ANKS1A
2	q31.3	rs62178054	181074287:182074287	CED	6.71687e-05	-0.0143611	0.00360271	7.29907e-09	-0.0194045	0.00335477	0.135211	CED	0.331112	-0.00774475	0.00796874	0.00138999	-0.0234938	0.00734883	0.0291677		-0.0132382	0.0032828	5.51612e-05	-0.0201097	0.00305181	4.4151e-11	AC009478.1, FTH1P20
4	q21.21	rs7696324	81776881:82776881	CED	6.91589e-05	0.0148008	0.00371948	7.13521e-10	0.0213368	0.00346186	0.15421		0.167579	0.0120757	0.00875019	1.27999e-05	0.0352601	0.00807972	0.00626311		0.0143838	0.00342306	2.64547e-05	0.0234964	0.00318208	1.53627e-13	RNU5A-2P, RASGEF1B	PRKG2
3	q23	rs2035936	140798124:141798124	CED	6.92457e-05	0.0305464	0.00767697	1.54824e-05	0.0307748	0.0071208	0.00314978		0.00444696	0.0433878	0.0152517	0.491539	0.00955716	0.0138939	0.0505271		0.0331422	0.00685727	1.34388e-06	0.026361	0.006337	3.18463e-05	RASA2	ZBTB38
6	p21.33	rs41315816	31444851:32444851	AED	7.0736e-05	0.0140698	0.00354057	2.32248e-05	0.0139517	0.00329712	0.0110111		0.0176865	-0.0257491	0.0108544	0.00338723	-0.0293552	0.0100175	0.0351504		0.0102406	0.00336603	0.00234754	0.00971879	0.00313184	0.00191429	STK19	HLA-DRB5, DXO, TNXB, LST1, MICB, HLA-B, TAP2, MICA, HLA-DQB1, AGPAT1, HLA-DRB6, TNXA
2	p21	rs34996358	46349495:47349495	AED	7.82254e-05	-0.0164146	0.00415573	0.00555957	-0.0107894	0.00389128	0.0108471		3.81271e-05	-0.0334714	0.00812588	0.701195	0.00286981	0.00747909	0.000499821		-0.0199509	0.00369994	6.95956e-08	-0.00787955	0.003452	0.0224537	CRIPT	PIGF, ATP6V1E2, RHOQ, CRIPT, SOCS5
10	q25.3	rs10886022	118278079:119278079	CED	8.44348e-05	0.0158482	0.00403104	7.96593e-08	0.0201391	0.00375161	0.0583315		0.901204	-0.00105906	0.00853113	0.00226991	0.0239458	0.00784433	0.00572497		0.0127624	0.00364466	0.000462367	0.0208477	0.00338446	7.28197e-10	KIAA1598	VAX1, SHTN1
11	q25	rs11222421	130372351:131372351	CED	8.5639e-05	0.0138422	0.00352385	1.18497e-07	0.0173532	0.00327665	0.0799697		0.872124	0.00144384	0.00897009	0.0284285	-0.0181414	0.00827848	0.0301558		0.0121846	0.00327984	0.000203205	0.0125457	0.00304668	3.82443e-05	SNX19, RN7SL167P	SNX19
9	q22.32	rs144736709	98675345:99675345	OED	9.0908e-05	-0.0371101	0.00948196	0.644458	0.00405899	0.00879568	0.00145671		0.0304539	-0.100973	0.0466556	0.616184	0.0208124	0.0415195	0.0255896		-0.0396432	0.009292	1.98668e-05	0.00477856	0.00860472	0.578661	ZNF367	HABP4
12	q24.31	rs147935170	123382462:124382462	CED	9.46879e-05	-0.0319257	0.00817786	4.25472e-08	-0.0412343	0.00752428	0.124063		0.0497509	-0.0241562	0.0123109	0.0874508	-0.0192937	0.0112892	0.110975		-0.0295469	0.00681189	1.44077e-05	-0.0344856	0.00626105	3.63011e-08	SETD8	ABCB9, TCTN2, RILPL2, KMT5A, CDK2AP1, DDX55
5	q12.2	rs1503526	62520706:63520706	CED	0.000103454	0.0134741	0.00347051	1.25026e-07	0.0170571	0.00322673	0.0091577		0.000362719	0.0272983	0.00765476	0.420926	0.0056815	0.00705931	0.000362595		0.0158312	0.00316082	5.48366e-07	0.0150911	0.00293469	2.71349e-07	CTD-2049O17.1, RP11-158J3.2
7	q11.22	rs10237317	69545941:70545941	CED	0.000103822	0.0137107	0.00353226	6.37448e-09	0.0190598	0.00328228	0.00711865		0.0048936	0.0218827	0.00777595	0.0559326	0.013775	0.00720597	0.039737		0.0151085	0.003216	2.62823e-06	0.0181517	0.00298701	1.22533e-09	AUTS2
18	q22.1	rs2156058	62812311:63812311	CED	0.000105075	-0.0145137	0.00374193	8.29531e-07	-0.0171956	0.00348905	0.214792		0.00223861	0.025022	0.00818557	0.160683	0.010595	0.00755272	0.00268698		-0.00767985	0.0034032	0.0240296	-0.012308	0.00316741	0.000101987	RP11-775G23.1	CDH7
10	q23.33	rs9888067	96148224:97148224	CED	0.000121616	0.0194417	0.00505908	0.1367	0.00699611	0.00470106	0.0121073		0.0119978	0.0203014	0.00808061	0.939583	-0.000562056	0.00741547	0.00736201		0.0196838	0.00428802	4.42357e-06	0.00482933	0.00397043	0.223862	RP11-400G3.3, CYP2C9	TBC1D12, HELLS, PDLIM1
10	q22.1	rs12359330	71914845:72914845	CED	0.000122734	0.0151489	0.00394432	8.72802e-08	0.0196537	0.00367249	0.100313		0.659344	0.00450033	0.0102089	0.00434728	0.0268126	0.00940149	0.0539506		0.0137658	0.00367926	0.000182954	0.0206015	0.00342076	1.71771e-09	PRF1, ADAMTS14	PRF1, ADAMTS14, SGPL1
15	q26.1	rs3817428	88915247:89915247	CED	0.000126689	-0.01502	0.0039187	5.84297e-15	-0.02845	0.00364373	0.0120792	CED	0.00472653	-0.0229627	0.00812753	0.0697931	-0.0135252	0.00745887	0.10127		-0.0165182	0.00352983	2.87448e-06	-0.0255745	0.00327396	5.65126e-15	ACAN
1	q32.2	rs7534723	209833428:210833428	CED	0.000127863	0.017032	0.00444627	1.31219e-07	0.0218835	0.00414669	0.0361445		0.00269037	0.0275535	0.00918053	0.965249	-0.000368317	0.00845395	0.00726061		0.019031	0.00400165	1.97669e-06	0.0175681	0.00372295	2.37155e-06	SYT14	IRF6, UTP25, TRAF3IP3
12	q24.21	rs12810788	115696322:116696322	AED	0.000132694	0.014156	0.00370432	0.0213364	0.00792802	0.00344398	0.00924852		0.259401	-0.0100811	0.00893847	0.00194447	-0.0255641	0.00824973	0.0335792		0.0106035	0.00342209	0.00194478	0.00295737	0.00317816	0.352097	RP11-110L15.1
17	q21.31	rs138418863	44162221:45162221	CED	0.000138148	0.015877	0.00416549	3.14715e-09	0.0229036	0.00386623	0.116536		0.0117566	0.0669306	0.0265649	0.313069	0.0246391	0.0244238	0.0801509		0.0171022	0.00411521	3.24086e-05	0.022946	0.00381868	1.86801e-09	ARL17A, NSF
6	p21.31	rs9296115	33934715:34934715	AED	0.00013975	0.0220089	0.00577859	7.39557e-11	0.0351004	0.00538946	0.0900167		0.0145007	0.0243664	0.00996683	0.433306	0.0072216	0.00921645	0.1033		0.022602	0.00499913	6.14948e-06	0.0279964	0.0046524	1.76985e-09	PACSIN1	SNRPC, PACSIN1, UHRF1BP1, SMIM29
5	q13.1	rs56194430	67324690:68324690	CED	0.000140202	-0.0133154	0.00349677	0.220674	-0.00398001	0.00324967	0.0242087		0.020144	-0.0190115	0.00818133	0.456193	0.00559638	0.00751054	0.0133548		-0.0141952	0.00321539	1.01115e-05	-0.0024699	0.00298246	0.407591	CTC-537E7.1
7	q21.2	rs10264916	91786376:92786376	SSE	0.000142486	0.0148676	0.00390851	2.42451e-13	0.0266684	0.00364146	0.000126736	CED	0.37081	0.00872368	0.00974746	0.00049721	0.0311812	0.0089536	0.0130264		0.0140166	0.00362774	0.000111669	0.0273089	0.00337316	5.682e-16	CDK6	CDK6, GATAD1
18	q21.32	rs76671217	57550672:58550672	SSE	0.000144088	0.0292611	0.00769801	2.87296e-08	0.0397197	0.00715768	0.019198		0.0475127	0.0338658	0.0170886	0.0575954	0.0301807	0.0158945	0.142201		0.0300379	0.00701873	1.87165e-05	0.0381114	0.00652645	5.23476e-09	MC4R, RP11-325K19.3
2	p23.3	rs113195763	24571380:25571380	CED	0.000146772	0.0234421	0.00617456	1.07027e-09	0.0351476	0.00576297	0.0117593		0.0418604	0.0177911	0.00874261	0.00533646	0.0223516	0.00802243	0.0225714		0.0215614	0.00504352	1.9107e-05	0.030792	0.00468049	4.74253e-11	ADCY3	ADCY3, NCOA1, DNAJC27-AS1
17	p13.1	rs8076642	6883984:7883984	AED	0.000163025	0.0135479	0.00359319	0.18144	0.00446848	0.00334383	0.0301236		0.873294	0.00173975	0.0109091	0.000715066	0.0337298	0.00996748	0.000847232		0.0123922	0.00341283	0.000282246	0.0074285	0.00317019	0.0191175	ZBTB4	CHRNB1, FGF11, POLR2A, CD68, TNFSF12, ZBTB4, TNFSF13, MPDU1
1	p33	rs1167272	49385987:50385987	CED	0.000163301	-0.0134458	0.00356651	5.75329e-10	-0.0205501	0.00331595	0.0757703	SSE_Female	0.315859	0.00905521	0.00902795	0.000224533	0.0308471	0.00835964	0.00114506		-0.0104082	0.00331705	0.00170225	-0.0135626	0.00308232	1.08179e-05	AGBL4-IT1	AGBL4
5	q15	rs6234	95228974:96228974	AED	0.000171876	0.0146885	0.0039094	1.87936e-08	0.0204595	0.00363854	0.0231757		0.0009495	-0.0272949	0.00825773	0.994135	5.56542e-05	0.00757117	0.00238252		0.00700164	0.00353343	0.0475306	0.0166313	0.00327949	3.95104e-07	PCSK1
4	q24	rs201081507	102181041:103181041	AED	0.000173666	0.0159247	0.00424136	0.125726	0.0060538	0.00395367	0.049856		0.0478238	-0.0208296	0.0105253	0.952037	-0.000583264	0.00969701	0.0785771		0.0107902	0.00393396	0.00609131	0.00510775	0.00366106	0.162969	BANK1
6	p22.2	rs140058581	25669270:26669270	SSE	0.000187562	-0.0350576	0.00938549	3.55343e-09	-0.0520578	0.00881735	0.0142811		0.914335	-0.00380049	0.0353292	0.0476603	-0.0638633	0.032247	0.0461346		-0.0329971	0.00907086	0.000275084	-0.052879	0.00850514	5.05766e-10	HIST1H2BD	BTN3A2, HIST1H2BD, BTN3A1, HIST1H4H
2	q11.2	rs6542923	100392516:101392516	CED	0.000189651	-0.0138779	0.00371812	7.53788e-07	-0.0171815	0.00347301	0.022246		0.0102258	0.024325	0.00947142	1.1205e-07	0.0464086	0.00874486	0.0433481		-0.00877676	0.00346099	0.0112157	-0.00851807	0.00322777	0.00831523	LONRF2	LONRF2
7	q11.23	rs7953	76923574:77923574	CED	0.000196457	0.0128951	0.00346306	2.99098e-08	0.0178891	0.0032278	0.125667		0.74623	-0.00427332	0.0132048	0.0736435	-0.0214737	0.0120041	0.0539349		0.0117903	0.00334978	0.000432012	0.015235	0.00311708	1.02085e-06	TMEM60	GSAP, PHTF2, PTPN12, CCDC146, TMEM60, APTR, RSBN1L
1	q22	rs61813324	155549877:156549877	CED	0.000196498	0.0190898	0.00512677	9.52092e-08	0.0255647	0.00479112	0.0531086		0.00207391	0.0421905	0.0136996	5.06714e-05	0.0516351	0.0127402	0.0569353		0.0219276	0.00480156	4.95336e-06	0.0287948	0.0044845	1.35402e-10	MEX3A	LMNA, MEX3A, SEMA4A, GBAP1, TMEM79, THBS3, CCT3
14	q31.1	rs10130216	79399861:80399861	CED	0.000197516	0.0134434	0.00361162	2.11437e-08	0.0187206	0.0033414	0.0944041	CED	0.00113816	-0.0260117	0.00799317	0.00257598	-0.0221316	0.00734182	0.115211		0.00675402	0.00329125	0.0401583	0.0117107	0.00304124	0.000117808	NRXN3
10	q24.31	rs61873510	102126510:103126510	CED	0.000204124	0.012984	0.00349603	4.33536e-07	0.0164093	0.00324694	0.303112		0.0256935	0.0171936	0.00770697	0.221766	0.008621	0.00705562	0.135684		0.0137024	0.00318378	1.67883e-05	0.0150482	0.0029496	3.36492e-07	PAX2, Y_RNA	SLF2
18	q21.32	rs79131845	57510896:58510896	CED	0.000215046	-0.0207005	0.00559362	2.46926e-10	-0.0330369	0.00521973	0.0405845	CED	0.00706788	-0.0332228	0.012333	0.696566	-0.0044319	0.0113649	0.00773267		-0.0228369	0.00509415	7.36114e-06	-0.028054	0.00474336	3.33151e-09	RP11-396N11.1, MC4R
1	p36.33	rs72634819	1096500:2096500	CED	0.000221353	-0.0132713	0.00359325	2.85457e-07	-0.0171359	0.00333839	0.0515645		0.000535863	-0.0295077	0.00852207	0.912428	-0.000865319	0.00786816	0.00676675		-0.0157221	0.00331097	2.04939e-06	-0.0146537	0.00307321	1.85875e-06	SLC35E2B	FNDC10, SLC35E2A, FO704657.1, MIB2, SLC35E2B, AL031282.1, CDK11B
16	p11.2	rs34898535	30525641:31525641	SSE	0.000222307	-0.0132365	0.0035849	1.71258e-18	-0.0292418	0.00333215	0.000391514	AED	0.727752	-0.00275943	0.00792665	0.000465867	-0.0254608	0.00727466	0.00745464		-0.0114574	0.00326638	0.000452027	-0.0285861	0.00302947	3.87233e-21	STX1B, STX4	ITGAM, CCDC189, ZNF668, PRSS53, ITGAD, MAPK3, BCKDK, STX4, STX1B, KAT8, ARMC5, PHKG2, ITGAX, ZNF646, HSD3B7, VKORC1, SETD1A
19	p13.11	rs10404726	18334514:19334514	CED	0.000229587	-0.0127892	0.00347145	3.85894e-10	-0.0202364	0.00323267	0.067259	AED	0.000138067	-0.0321218	0.00842635	0.299507	-0.0080656	0.00777404	0.0158754		-0.0155943	0.00320974	1.18314e-06	-0.0184422	0.00298489	6.47123e-10	CRTC1	ELL, UBA52, CRTC1, REX1BD, LRRC25
20	p11.21	rs6083730	24527526:25527526	CED	0.000230043	0.0133329	0.00361955	8.9276e-07	0.0165248	0.00336276	0.0502608		0.00402348	-0.0228073	0.00792878	0.473197	-0.00524268	0.00730897	0.0101323		0.0071002	0.00329268	0.0310557	0.012722	0.00305493	3.12144e-05	ACSS1	CST7, ENTPD6, ZNF337, PYGB, ACSS1
12	q13.2	rs2292238	55993822:56993822	CED	0.000232045	-0.0135002	0.00366716	7.60199e-06	-0.0152812	0.00341386	0.21235		0.00701013	0.0208258	0.00772318	0.314561	-0.00712623	0.00708577	0.00382804		-0.00718493	0.00331269	0.0300893	-0.0137449	0.00307552	7.85431e-06	ERBB3	RAB5B, SUOX, MYL6B, SPRYD4, AC034102.3, ERBB3, MYL6, RPS26
15	q25.2	rs2730101	83800654:84800654	CED	0.000252811	0.0132237	0.00361355	1.04164e-11	0.0229476	0.00337413	0.0492024	AED	0.153037	-0.0111549	0.00780652	1.83706e-08	-0.0402271	0.00714793	0.000587177		0.00892192	0.00327927	0.00651432	0.0114358	0.00305126	0.000178321	SH3GL3, ADAMTSL3	SH3GL3, ADAMTSL3, WHAMM, GOLGA6L5P
1	q25.3	rs3814333	183507119:184507119	SSE	0.000253087	0.0136984	0.00374356	1.07488e-08	0.0199082	0.00348123	6.36768e-05	AED	0.0976867	-0.0154202	0.0093105	0.000306123	-0.0310074	0.00858845	0.000146233		0.009646	0.00347331	0.00548334	0.0127233	0.00322627	8.025e-05	COLGALT2, TSEN15	COLGALT2, TSEN15
1	q22	rs76102184	155671486:156671486	CED	0.000270772	0.0426911	0.0117224	1.28845e-06	0.0523299	0.0108082	0.324353		0.0454951	0.0517373	0.025867	0.000671558	0.0825231	0.024263	0.177082		0.0442324	0.0106772	3.43227e-05	0.0573292	0.00987293	6.37131e-09	SLC25A44	SEMA4A, GLMP, GBAP1, SMG5, TMEM79, PAQR6, THBS3, SLC25A44
10	q22.1	rs3926930	71946296:72946296	CED	0.00027942	-0.0157383	0.00433115	3.74099e-06	-0.0186912	0.00404099	0.114434		0.390819	0.00733559	0.00854819	0.0154758	0.0190689	0.00787599	0.0080041		-0.0110248	0.00386353	0.00432317	-0.0108224	0.00359537	0.00261172	ADAMTS14	ADAMTS14
16	q24.3	rs77733403	89580723:90580723	CED	0.00028569	-0.0166137	0.00457928	8.37222e-10	-0.0262219	0.00427206	0.00625721		1.09338e-05	0.0335561	0.00762897	0.285011	0.00752877	0.00704186	7.78253e-05		-0.00332536	0.00392627	0.397022	-0.017142	0.00365248	2.689e-06	DBNDD1	SPATA2L, DBNDD1, AFG3L1P, ZNF276, DEF8, VPS9D1, FAM157C, GAS8, FANCA, ANKRD11, MC1R, TCF25
2	p16.1	rs3791679	55596892:56596892	SSE	0.00029687	-0.0149874	0.00414235	1.01042e-14	-0.0298397	0.00385598	0.00157495	SSE_Female	0.250985	-0.0103181	0.00898801	8.76914e-08	-0.044287	0.00827565	0.0002936	SSE	-0.0141694	0.00376203	0.000165611	-0.0324168	0.00349519	1.78169e-20	EFEMP1	EFEMP1
6	p21.33	rs3020582	30851522:31851522	SSE	0.000310993	0.0161503	0.00447867	3.78771e-10	0.0262941	0.00419841	0.000997169		0.0756335	-0.0320824	0.0180577	7.79556e-05	-0.0669524	0.0169457	0.000410138		0.0133553	0.00434697	0.00212405	0.0209013	0.0040752	2.91418e-07	HLA-S, XXbac-BPG181B23.7	TSSC4, DDR1, LST1, HLA-DQA1, HLA-H, HLA-G, RNF5, ATP6V1G2, HLA-A, GALNT2, BTN3A2, KLRK1, TCF19, HCG27, POU5F1, CD248, MICA, HLA-C, CSNK2B, AL645933.2, IER3, PRRT1, PSORS1C3, SLC44A4, HLA-DQB1, BAG6, HLA-DRA, DDAH2, TMEM154, HLA-DRB1, VARS2, HLA-B, SKIV2L, WASF5P, B2M
19	q13.32	rs7412	44912079:45912079	CED	0.000316623	0.0229445	0.00637102	1.37964e-10	0.0380572	0.00592932	0.0306289		0.000545755	0.0479697	0.0138738	0.549676	0.00764456	0.0127782	0.00986537		0.0273027	0.00578974	2.40882e-06	0.0326691	0.0053785	1.24747e-09	APOE	LDLR, ABCG1, APOB, APOC1, NECTIN2, APOE
18	q21.32	rs117758180	57309744:58309744	AED	0.000322397	0.0403226	0.0112111	2.78061e-07	0.0539969	0.0105095	0.160037		0.117412	0.0387305	0.0247358	0.00257749	0.0691425	0.0229384	0.178626		0.0400513	0.0102112	8.77184e-05	0.0566246	0.00955444	3.09421e-09	RP11-795H16.3
1	p31.1	rs7525548	74501474:75501474	CED	0.000326898	0.0126805	0.00352914	4.14312e-06	0.0151329	0.00328676	0.109053		0.681526	0.00319096	0.00777552	0.0131948	0.017849	0.0072013	0.0704739		0.0110595	0.00321362	0.000578588	0.0156012	0.00299005	1.81169e-07	TNNI3K	LRRC53, CRYZ, FPGT
3	p21.31	rs73078367	48208347:49208347	AED	0.000341936	-0.0200685	0.00560362	0.0085131	-0.0136706	0.00519588	0.0048575		0.0150064	-0.0926571	0.0380936	0.225248	-0.041414	0.03415	0.0302478		-0.021606	0.00554396	9.73079e-05	-0.0142983	0.00513676	0.00537718	NCKIPSD	WDR6, AMT, IP6K2, GPX1, P4HTM, CELSR3, DCUN1D1, NICN1, LAMB2, CRBN
19	q13.11	rs7257083	33443986:34443986	SSE	0.000342586	0.0137205	0.00383163	3.75476e-13	0.0258389	0.00355681	0.00390993		0.00313495	-0.0236979	0.00802119	0.000234356	-0.0272005	0.00739325	0.0126877		0.00676849	0.00345741	0.0502683	0.0158703	0.00320518	7.36617e-07	PEPD	CEBPG, PEPD, CHST8
6	q21	rs2253310	108388593:109388593	CED	0.00036992	0.0137386	0.00385837	2.26682e-11	0.0240234	0.00359195	0.0173885	CED	0.353006	-0.00790849	0.00851484	0.0123585	-0.0196287	0.00784569	0.0945782		0.010051	0.0035144	0.0042372	0.0164592	0.00326594	4.66363e-07	FOXO3
4	p16.3	rs59950280	2952345:3952345	AED	0.000370112	0.0209685	0.00588902	0.753325	0.00172253	0.00548125	0.0167458		0.6971	0.00399144	0.0102544	0.017135	-0.0224054	0.00939865	0.0190895		0.016758	0.00510679	0.00103255	-0.00440105	0.00473487	0.352631	HGFAC, DOK7	DOK7, HGFAC, RGS12
10	q21.3	rs10997957	69416441:70416441	AED	0.000371744	0.0130787	0.00367436	0.615395	0.00171992	0.00342349	0.00710127		0.532607	0.00635419	0.0101824	9.37115e-05	-0.0364562	0.0093317	0.0004515		0.0123039	0.00345622	0.000370931	-0.00280873	0.00321403	0.382174	MYPN	SLC25A16, MYPN, STOX1
15	q26.3	rs72755233	100192953:101192953	SSE	0.000384211	-0.0193556	0.0054511	1.46507e-13	-0.0376682	0.00509662	0.0141306	AED	0.0181766	-0.0286388	0.0121242	8.21793e-06	-0.0490856	0.0110058	0.0412257		-0.0209166	0.00497171	2.58641e-05	-0.0396843	0.0046248	9.42485e-18	ADAMTS17
4	p15.2	rs34811474	24908838:25908838	CED	0.000430711	-0.0144203	0.004096	7.33568e-07	-0.0189213	0.00382061	0.0483136		0.00150026	0.079252	0.0249621	0.622128	0.0114411	0.0232146	0.00859971		-0.0119643	0.00404195	0.00307607	-0.0181206	0.0037699	1.53475e-06	ANAPC4	ANAPC4
17	p13.3	rs4268798	1866585:2866585	CED	0.000431378	0.0221816	0.00630127	0.0119303	0.014767	0.0058734	0.176191		0.923442	0.000750534	0.00780991	0.0064362	0.0196407	0.00720804	0.00614309		0.0137314	0.00490408	0.0051104	0.0167117	0.00455321	0.000242247	METTL16	MNT, METTL16, SGSM2
9	q21.13	rs35344761	78010823:79010823	CED	0.000480174	-0.01858	0.00532127	3.58949e-10	-0.0311709	0.00497045	0.0287053	SSE_Female	0.281859	-0.013105	0.0121774	0.00012328	-0.0427594	0.0111356	0.025291		-0.0177022	0.00487605	0.00028295	-0.0330962	0.00453883	3.05877e-13	PCSK5
20	q13.33	rs62217799	61847191:62847191	SSE	0.000480837	0.0128808	0.00368941	8.35903e-09	0.019833	0.00344245	0.00246492		0.000955935	-0.0335093	0.0101436	0.07762	-0.0164808	0.0093391	0.00907869		0.00746083	0.00346719	0.0314103	0.0154892	0.00323001	1.62338e-06	RP4-583P15.15
3	p22.1	rs4973930	40806063:41806063	CED	0.000506868	0.0120908	0.00347719	2.64084e-10	0.02045	0.00323634	0.0190688		0.139301	0.011272	0.00762429	0.00491861	0.0197957	0.00703855	0.00140101		0.0119498	0.0031637	0.000158624	0.0203358	0.0029404	4.64607e-12	ULK4	ULK4, CTNNB1
9	q34.11	rs2267958	130515279:131515279	CED	0.000518598	0.0168304	0.00484882	0.0129987	0.0111761	0.00449955	0.0268724		0.0553921	0.0207347	0.0108227	0.00791406	0.0266935	0.0100509	0.111792		0.0174831	0.00442501	7.78354e-05	0.0137668	0.0041068	0.000801735	DNM1	DNM1, URM1, CIZ1
16	p12.3	rs72771049	19433511:20433511	CED	0.000532928	-0.0173227	0.00500121	0.882244	0.000685607	0.00462856	0.00822491		0.00114324	-0.0320755	0.00986041	0.258672	-0.0102398	0.00906539	0.0135638		-0.0203413	0.0044603	5.10232e-06	-0.00157356	0.00412233	0.702671	AC134300.1, GPR139	IQCK, KNOP1, AC027130.1, GPRC5B, VPS35L
6	p21.1	rs2479717	41405174:42405174	CED	0.000535713	-0.0137125	0.00396051	2.88463e-08	-0.0204178	0.00367985	0.0231975		0.00272388	0.0228862	0.00763504	0.618836	0.00350888	0.00705297	0.0258857		-0.00595259	0.00351566	0.0904241	-0.0152982	0.00326249	2.74394e-06	CCND3	BYSL, CCND3, FRS3, USP49, MED20
9	q22.2	rs10465231	91683413:92683413	CED	0.000540659	0.0120758	0.00349029	1.96396e-06	0.0154876	0.00325558	0.08029		0.596938	-0.00404268	0.00764482	0.000149771	0.0267007	0.00704169	0.00134343		0.00929553	0.00317503	0.00341483	0.0174623	0.00295504	3.43529e-09	SEMA4D, GADD45G	SEMA4D, SECISBP2
15	q25.2	rs28557338	84353685:85353685	CED	0.000562936	0.0195813	0.00567749	2.44455e-10	0.0333958	0.00527514	0.0438253		0.107037	0.0142819	0.00886139	1.455e-06	0.0390038	0.00809538	0.00718804		0.018039	0.00478047	0.000160984	0.0350673	0.00441963	2.11433e-15	UBE2Q2L, CSPG4P11
17	p11.2	rs9902386	20780185:21780185	CED	0.000638464	-0.0125239	0.00366755	0.673264	-0.0014406	0.00341638	0.0180943		1.7032e-06	0.080558	0.0168296	0.0289	0.0336659	0.0154083	0.0199362		-0.00830383	0.00358345	0.0204888	0.000204409	0.00333538	0.951132	KCNJ12	C17orf51, MAP2K3, KCNJ12
1	q25.2	rs11807570	177492892:178492892	CED	0.000739452	0.0125894	0.00373066	2.97284e-06	0.0162412	0.00347568	0.198666		0.119783	0.0127998	0.00822755	5.69482e-05	0.0305431	0.00758736	0.0130669		0.0126253	0.00339769	0.000202525	0.0187218	0.00315991	3.12686e-09	RP11-568K15.1
7	q36.1	rs7794796	150040196:151040196	AED	0.000847847	0.0121305	0.00363542	4.68979e-05	0.0137724	0.00338333	0.0411119		0.00445158	-0.0587629	0.0206588	0.374613	0.0164521	0.0185298	0.00256425		0.0100011	0.00358041	0.0052176	0.0138589	0.0033283	3.12804e-05	AOC1	TMEM176A, DBNL, KCNH2, TMEM176B, AOC1
5	q33.3	rs201769762	157509230:158509230	CED	0.000850358	-0.0140915	0.00422418	1.04281e-08	-0.0224784	0.00392713	0.102769		0.0127175	-0.027267	0.0109431	0.644085	-0.00464785	0.0100603	0.035916		-0.0158001	0.00394077	6.08729e-05	-0.0201207	0.00365828	3.79738e-08	RP11-32D16.1, EBF1
2	p16.1	rs17049738	58526222:59526222	CED	0.000883171	-0.0220696	0.00663671	9.52608e-08	-0.0326584	0.00612068	0.0666656		0.0163542	-0.0229157	0.00954407	0.00133941	-0.0283047	0.0088242	0.121078		-0.0223454	0.00544882	4.11441e-05	-0.0312442	0.00502927	5.21608e-10	LINC01122
15	q21.2	rs35697691	51853498:52853498	CED	0.000894841	0.020476	0.00616429	3.63227e-08	0.0315161	0.00572179	0.108082	SSE_Female	0.651375	0.00625238	0.0138371	0.00210706	0.0385915	0.0125505	0.00243759		0.0181206	0.00563081	0.00129035	0.0327336	0.00520626	3.22917e-10	CTD-2184D3.5	TMOD2, TMOD3, MYO5A
11	p14.1	rs640494	29908061:30908061	CED	0.000908295	0.0118614	0.00357534	5.60088e-11	0.0217201	0.00331382	0.00402422		0.00306875	0.0249095	0.00841255	0.0335762	-0.0164271	0.00772967	0.000148303		0.0138576	0.0032905	2.53773e-05	0.0157974	0.00304572	2.14009e-07	MPPED2	ARL14EP, MPPED2
13	q14.2	rs809845	50224055:51224055	CED	0.00108496	-0.014283	0.00437112	2.59779e-06	-0.0190809	0.00405939	0.0838684		0.0173843	0.0185909	0.00781588	0.491552	0.00499333	0.00725935	0.034096		-0.00645067	0.00381503	0.0908642	-0.0133462	0.00354306	0.000165321	DLEU1	EBPL, KCNRG, COBL, RCBTB1, DLEU1, DLEU2
15	q25.2	rs58824810	84170975:85170975	CED	0.0012529	0.0185066	0.00573561	6.56236e-07	0.0265341	0.00533449	0.0774887		0.454751	-0.00630619	0.00843608	4.21779e-05	-0.0317651	0.00775581	0.00350693		0.0106627	0.00474317	0.0245753	0.00781139	0.00439522	0.0755275	ADAMTSL3	WDR73, UBE2Q2P1
15	q26.3	rs56803094	98722509:99722509	CED	0.00126028	-0.0133633	0.00414376	1.72762e-09	-0.0232296	0.00385756	0.0281477		0.812232	-0.0021663	0.0091194	0.0232741	-0.0190526	0.00839698	0.0565175		-0.0114471	0.00377256	0.00241092	-0.0225017	0.00350536	1.36967e-10	IGF1R	IGF1R
8	p22	rs1559900	13707321:14707321	CED	0.00134398	0.0121513	0.00378962	1.1275e-06	0.0171599	0.00352494	0.0193365		0.00126337	0.0345944	0.0107288	0.222102	0.0120285	0.00985155	0.00903463		0.0146408	0.00357326	4.17967e-05	0.0165775	0.00331889	5.88656e-07	SGCZ
9	q31.1	rs3923501	102565884:103565884	AED	0.00139952	0.0110771	0.00346722	3.80435e-08	0.0177335	0.00322431	0.00983008	AED	0.175717	0.0111472	0.00823227	0.000321792	0.0272093	0.00756363	0.0197755		0.0110877	0.00319537	0.000520631	0.0191907	0.00296605	9.7932e-11	TEX10	STX17, TEX10, INVS
21	q22.3	rs400997	46064154:47064154	CED	0.00142968	0.0111946	0.00351078	1.89826e-09	0.0196105	0.00326484	0.0430851	CED	0.0908056	0.0134555	0.0079561	2.8307e-05	0.0307951	0.00735467	0.0353916		0.0115631	0.00321197	0.000318213	0.0214517	0.00298404	6.53523e-13	ADARB1	LINC00205, POFUT2, ADARB1
18	p11.32	rs60764613	1339911:2339911	CED	0.00145884	0.0156834	0.00492756	1.11629e-07	0.0244328	0.00460397	0.0569772		0.0761598	0.013526	0.00762683	0.0134844	0.0173289	0.00701342	0.0976868		0.0150481	0.00413887	0.000277135	0.0222934	0.00384878	6.94152e-09	CTD-2015H3.1, RP11-161I6.2
5	q31.2	rs13174863	138580745:139580745	CED	0.0015527	0.0123221	0.00389361	1.97151e-10	0.0230433	0.00362094	0.0134607		0.666967	-0.00346512	0.00805247	2.40566e-05	0.0309773	0.00733369	0.000782603		0.00933048	0.00350534	0.00777262	0.0245984	0.00324676	3.55581e-14	CTB-35F21.1	CXXC5, CTNNA1
3	q26.31	rs4894803	171300256:172300256	CED	0.00182009	-0.0110531	0.00354475	0.291505	-0.00349002	0.00330861	0.0781982		0.575983	0.0124909	0.0223343	0.0605952	0.0391304	0.020853	0.0891313		-0.0104746	0.00350093	0.00277203	-0.00244344	0.00326773	0.454613	FNDC3B
17	p13.1	rs2242449	6595507:7595507	CED	0.00185711	0.0110118	0.00353825	2.66842e-07	0.0169009	0.0032845	0.00556921		0.831654	-0.0016368	0.0076996	1.82807e-06	-0.0336599	0.00705327	0.000465066		0.00880645	0.00321503	0.00615982	0.00789069	0.00297749	0.0080465	DLG4	CLDN7, DLG4, ELP5, ACADVL, ASGR2, CTDNEP1, GRAMD1C, DVL2
8	p23.1	rs12677507	8981687:9981687	CED	0.00187193	-0.0115205	0.00370448	3.01175e-06	-0.0160938	0.00344609	0.00582747		1.14902e-05	0.0351431	0.00800938	0.516211	0.00476819	0.00734468	0.000844833		-0.00329724	0.00336226	0.32676	-0.0123298	0.00311976	7.74496e-05	TNKS	TDH, TNKS, FAM86B3P, FAM66D, FDFT1, NEIL2, FAM66A, CLDN23, MFHAS1, FAM167A, BLK, MSRA
2	p21	rs10865202	44264956:45264956	CED	0.00190955	0.0178364	0.00574627	0.583155	0.00292698	0.00533359	0.0297794		0.000837799	0.0394931	0.0118231	0.878058	0.00168754	0.0109986	0.00961081		0.0219746	0.00516819	2.1198e-05	0.002691	0.00479908	0.574979	CAMKMT	PREPL, CAMKMT
15	q24.3	rs11855853	77512618:78512618	CED	0.00192589	-0.0121747	0.00392546	1.40263e-06	-0.0175351	0.00363437	0.111443		0.000275754	-0.0572512	0.0157393	0.40171	0.0119757	0.0142809	0.000562288		-0.0148144	0.00380879	0.000100439	-0.0157401	0.0035221	7.86088e-06	LINGO1	TSPAN3
5	q21.3	rs286818	106933446:107933446	CED	0.00204412	-0.0142949	0.00463549	2.24769e-05	-0.0182103	0.00429604	0.0285669		0.0277011	-0.0273366	0.0124167	0.00472292	-0.0325654	0.0115255	0.049469		-0.0158902	0.00434273	0.000253162	-0.0199615	0.00402549	7.09424e-07	FBXL17
12	q23.3	rs11609659	107796260:108796260	CED	0.00206706	-0.0124876	0.00405378	1.09591e-07	-0.0200151	0.00376913	0.0455579		0.000108376	-0.0297253	0.00767796	0.304301	-0.00726874	0.00707581	0.00275855		-0.0162453	0.00358481	5.85106e-06	-0.0171978	0.00332661	2.3439e-07	RP11-554D14.3, RP11-554D14.2	RFPL1S
21	q22.3	rs76040172	45988959:46988959	CED	0.00225485	-0.0206881	0.00677303	2.48509e-07	-0.0325282	0.00630513	0.0513367		0.0521642	-0.0390391	0.0201041	0.000420853	-0.0652079	0.0184885	0.0484652		-0.0225586	0.00641856	0.000440429	-0.0359329	0.00596765	1.73038e-09	LINC00162, SSR4P1	LINC00334, ITGB2-AS1, ADARB1
12	q24.21	rs7962636	115950006:116950006	CED	0.0024325	-0.0110263	0.00363706	6.75149e-09	-0.0196344	0.00338684	0.00497279		0.522019	0.00836588	0.0130667	0.0075012	0.0321933	0.01204	0.0271126		-0.0096319	0.00350386	0.00597883	-0.015834	0.0032603	1.19409e-06	MED13L
20	p11.21	rs11474838	24949887:25949887	SSE	0.0027322	0.0104973	0.00350329	7.98256e-12	0.0222874	0.00325873	0.000992514		0.00170128	0.0254605	0.00811304	0.0493251	0.0146821	0.00746868	0.0150536		0.0128489	0.00321625	6.46986e-05	0.0210711	0.0029868	1.72932e-12	NINL	NINL, FAM182A, ENTPD6, NANP, MALT1, ABHD12, GINS1, FAM182B, PYGB
5	q31.1	rs7738043	133370739:134370739	AED	0.00282425	-0.0104981	0.00351543	3.86284e-06	-0.0151085	0.00327112	0.0584021		0.0637035	0.0152801	0.00824027	0.409447	0.00626371	0.00759352	0.102331		-0.00652885	0.00323348	0.0434724	-0.0117632	0.00300423	9.01935e-05	JADE2	CAMLG, SAR1B, JADE2, TXNDC15
14	q32.12	rs117068593	92618229:93618229	CED	0.00285319	-0.0105179	0.00352575	0.0777837	-0.00578717	0.00328126	0.167895		0.00433836	-0.0527821	0.0185028	0.317439	-0.0168925	0.0168968	0.055773		-0.0119987	0.00346343	0.000531395	-0.00619075	0.00322109	0.0546128	RIN3	RIN3
17	q25.3	rs7503604	78595629:79595629	CED	0.00293837	-0.0123301	0.00414576	2.8255e-06	-0.018126	0.0038704	0.177202		0.0852692	-0.0210139	0.0122107	0.00182124	-0.0343991	0.0110319	0.024518		-0.0132276	0.00392567	0.000752974	-0.0199095	0.00365216	4.99655e-08	AATK	EML4, BAIAP2, AATK
4	p15.1	rs73213484	27989339:28989339	CED	0.00298427	-0.0148701	0.00500778	2.35939e-08	-0.0260178	0.0046597	0.103167	CED	0.000201289	-0.0378907	0.0101917	0.0273655	-0.0207459	0.00940283	0.0221915		-0.0193471	0.00449452	1.67285e-05	-0.0249784	0.00417515	2.19555e-09	RP11-123O22.1
15	q26.1	rs530742363	88899167:89899167	CED	0.00312862	-0.0109641	0.00371054	7.22238e-10	-0.0212408	0.00344737	0.0351861		0.000279835	0.0297157	0.00817782	0.916289	0.000802955	0.00763921	0.00488855		-0.00401903	0.00337899	0.234274	-0.0175112	0.00314223	2.50611e-08	ACAN
2	p23.3	rs1009388	24891101:25891101	SSE	0.00330956	-0.0103878	0.00353631	2.17583e-14	-0.0250973	0.00328483	0.000435374		0.00260608	0.03877	0.0128762	0.332424	0.0115891	0.0119567	0.0541083		-0.00694004	0.00341004	0.0418331	-0.0225227	0.00316747	1.15517e-12	POMC	ADCY3, DNMT3A, DNAJC27-AS1, POMC
5	q33.3	rs17055653	157418528:158418528	AED	0.00336298	0.0109777	0.00374348	1.71322e-11	0.0234667	0.00348741	0.00925921		0.00165882	-0.0269504	0.00856758	0.17363	-0.0108048	0.00794091	0.0754327		0.00489753	0.00343033	0.153374	0.0179255	0.00319305	1.9782e-08	RP11-32D16.1
6	p21.31	rs9394204	33725269:34725269	SSE	0.00350061	-0.013724	0.00469996	4.74411e-14	-0.0329562	0.00437122	0.000588217		0.423577	0.00919079	0.011485	0.00109155	0.0349879	0.0107126	0.015663		-0.010437	0.00434983	0.0164216	-0.0232582	0.00404725	9.10212e-09	C6orf1, RPL35P2	SMIM29, HMGA1
15	q21.1	rs11070586	47251837:48251837	CED	0.00350895	0.0103249	0.00353681	4.52036e-06	0.0151169	0.0032963	0.0129731		0.0526917	0.0215102	0.011102	0.00848776	0.0273342	0.0103847	0.0987822		0.0113555	0.00336994	0.000752643	0.0162352	0.00314182	2.37319e-07	SEMA6D
6	p12.3	rs75397901	49985961:50985961	CED	0.00359293	0.039813	0.0136725	1.8233e-06	0.0608852	0.0127582	0.16507		0.00224069	0.0677529	0.0221663	0.0187456	0.04862	0.0206837	0.0484418		0.0475133	0.0116369	4.44575e-05	0.0575048	0.0108586	1.18522e-07	RP11-524K22.1
16	p11.2	rs7193065	29533527:30533527	SSE	0.00392895	0.0104615	0.00362762	4.60773e-09	0.0198289	0.00338318	0.00884576	AED	0.252754	-0.0091938	0.0080386	0.00146193	-0.0234613	0.00737232	0.0322436		0.00713596	0.00330653	0.0309166	0.0122982	0.00307487	6.34501e-05	DOC2A	INO80E, ASPHD1, MAPK3, FAM57B, DOC2A, YPEL3
15	q21.2	rs979259	51459430:52459430	CED	0.00402806	0.0116762	0.00405989	5.47392e-08	0.0205387	0.00377868	0.0522866		0.482157	0.00543253	0.00772934	0.00153281	0.022617	0.00713783	0.00971964		0.0103261	0.00359424	0.00406649	0.0209936	0.00333958	3.25112e-10	DMXL2, SCG3	TMOD2, AC020892.1, GNB5, AC090971.4, LYSMD2, DMXL2
8	p23.1	rs6601527	10165444:11165444	CED	0.00418926	-0.0101012	0.00352747	5.58066e-06	-0.0149231	0.00328572	0.0121653		0.00283319	-0.0229541	0.00768852	0.298222	-0.00734652	0.00706215	0.00170269		-0.0123362	0.00320614	0.000119238	-0.0135749	0.00297907	5.19512e-06	PINX1	RP1L1, AF131215.5, SOX7, AF131215.6, FAM86B3P, FDFT1, NEIL2, AF131216.3, FAM66A, XKR6, CLDN23, AF131215.2, FAM167A, BLK, MSRA, AC087203.2, SLC35G5
2	q31.2	rs35445420	178912966:179912966	AED	0.00424214	-0.0267913	0.00936886	0.210509	-0.0109855	0.00877317	0.0037149		0.669813	-0.00459342	0.0107724	0.0768559	-0.0173949	0.00983166	0.18659		-0.0172317	0.00706929	0.0147872	-0.0138267	0.00654592	0.0346637	TTN	SESTD1
4	q13.3	rs7697556	73015313:74015313	AED	0.00447733	-0.00986336	0.00347002	4.12123e-09	-0.0189874	0.00322942	0.0462078		0.010634	-0.277248	0.108527	0.467145	-0.076436	0.105119	0.0326205		-0.0101364	0.00346825	0.00347079	-0.0190416	0.0032279	3.65571e-09	ADAMTS3, HNRNPA1P67	ADAMTS3
3	p25.1	rs2455821	15181940:16181940	CED	0.00475753	0.0109989	0.0038961	5.2738e-06	0.0165495	0.00363428	0.0331523		0.384584	-0.00902345	0.0103778	0.00371766	0.0275862	0.00950809	0.00464679		0.00852547	0.00364752	0.0194219	0.0179564	0.00339474	1.22669e-07	BTD	BTD, EAF1, ANKRD28, COLQ, HACL1
4	q12	rs13128180	55786188:56786188	CED	0.00482767	0.010587	0.00375644	4.67436e-09	0.0205309	0.00350439	0.0373556		0.770289	0.00233192	0.00798602	3.73695e-05	0.0304536	0.00738518	0.000631017		0.00909143	0.00339917	0.00748186	0.0223545	0.00316603	1.6561e-12	TMEM165	SRD5A3-AS1, SRD5A3, AC024243.1, TMEM165, CLOCK, RN7SKP30, NMU
6	q23.1	rs9375702	129884187:130884187	SSE	0.00513128	-0.0104952	0.00375002	1.01803e-11	-0.0237267	0.00348698	0.00750695		0.654462	-0.0038527	0.00860793	1.6126e-05	-0.0340313	0.00789	0.00195169		-0.00943563	0.00343794	0.0060593	-0.0254105	0.00318939	1.62308e-15	L3MBTL3	SAMD3, L3MBTL3
11	p11.2	rs7121515	43383280:44383280	CED	0.00519776	-0.0102388	0.00366385	1.07522e-05	-0.0150476	0.00341868	0.0695648		0.321429	0.00767544	0.00774092	0.013516	0.0175462	0.0071038	0.173739		-0.00696012	0.00331164	0.0355784	-0.00891843	0.00308052	0.00379028	RP11-613D13.5
6	q22.31	rs9387640	119008871:120008871	AED	0.00533081	-0.0100426	0.00360418	6.67687e-08	-0.0181581	0.00336268	0.026799		0.67751	-0.00366986	0.00882461	0.00356726	0.0234991	0.0080635	0.0115183		-0.00913154	0.00333662	0.00620466	-0.0119868	0.00310362	0.000112375	MAN1A1	MAN1A1
20	q11.22	rs2275274	33357544:34357544	AED	0.0053915	-0.0112945	0.00405884	0.000599405	-0.0129593	0.00377609	0.0485303		0.0109816	-0.0226764	0.00891568	0.355081	-0.00755161	0.00816576	0.105465		-0.0132484	0.00369405	0.000335244	-0.0120066	0.00342737	0.000459775	RP4-614O4.11	UQCC1, TRPC4AP, CPNE1, MMP24, PROCR, MMP24OS, MYH7B, MT1P3, EIF6
4	q31.21	rs1812175	145074844:146074844	SSE	0.00575947	0.0127669	0.00462365	1.83236e-15	0.0342218	0.00430308	0.000455396	CED	0.00866279	0.0200705	0.00764522	3.64505e-05	0.0291024	0.00704771	2.35848e-06		0.0147228	0.00395639	0.000198212	0.0328316	0.00367263	3.90847e-19	HHIP	HHIP
18	q11.2	rs7241413	20461635:21461635	CED	0.00585957	-0.00957595	0.00347512	8.03874e-09	-0.0185676	0.00321912	0.0286371	AED	0.000440542	0.0397201	0.0113005	0.623884	0.00509595	0.0103923	0.0110865		-0.00531689	0.00332161	0.109444	-0.0164958	0.00307497	8.11536e-08	TMEM241	TMEM241, RIOK3, RMC1
6	p22.2	rs13217807	24907330:25907330	SSE	0.00593282	-0.0122315	0.00444538	2.34786e-08	-0.023064	0.00413005	0.00198279		0.051954	0.0283084	0.014565	0.843544	-0.00261888	0.0132694	0.0582474		-0.00877689	0.00425176	0.0389895	-0.0212583	0.00394346	7.01505e-08	LRRC16A	BTN3A2, HIST1H2BD, CARMIL1
19	p13.11	rs78830644	18388150:19388150	CED	0.00610728	0.0178111	0.00649567	1.31437e-05	0.0263317	0.00604242	0.0891358		0.0453473	-0.0609195	0.030437	0.752316	-0.00906399	0.0287208	0.0841352		0.0143815	0.00635261	0.0235822	0.0248314	0.00591298	2.67529e-05	CRTC1
20	q11.22	rs6060314	33311062:34311062	SSE	0.00629511	0.00976402	0.0035739	1.44097e-08	0.0188352	0.00332268	0.000770516		0.0111641	0.0246067	0.00969657	0.649505	0.00402702	0.00886125	0.0072399		0.0115392	0.00335338	0.000579428	0.0170098	0.00311116	4.56784e-08	MMP24-AS1	UQCC1, TRPC4AP, CPNE1, GGT7, MMP24OS, EDEM2, EIF6
18	q21.1	rs8087074	45423482:46423482	CED	0.00655791	0.0107677	0.00396084	9.18029e-08	0.0196928	0.00368609	0.0345737		0.000781581	0.0256675	0.00764015	0.49939	0.00474432	0.00702388	0.0121382		0.0139239	0.00351639	7.50352e-05	0.0164649	0.00326393	4.54745e-07	ZBTB7C
14	q32.32	rs3803286	102746470:103746470	CED	0.0068899	0.01173	0.00434098	6.94617e-08	0.0218065	0.00404365	0.0522832		0.750233	0.00346634	0.010889	0.00507307	0.0278874	0.00995089	0.00848658		0.0105968	0.00403236	0.00859056	0.0226683	0.00374616	1.43879e-09	TRAF3	TRAF3
2	q12.1	rs533493779	103947054:104947054	CED	0.00699945	0.00972916	0.00360753	6.98454e-06	0.0150963	0.00335899	0.0745211		0.715163	-0.00278327	0.00762678	2.94162e-06	0.0328466	0.00702526	0.000295079		0.0074415	0.00326111	0.0224958	0.0183991	0.00303041	1.26731e-09	AC018880.2, AC013727.1
6	p22.3	rs41271299	19339415:20339415	SSE	0.00712245	0.0210221	0.00781171	1.52721e-14	0.0559078	0.00727413	0.00108209	CED	0.0160226	0.0407887	0.0169351	0.00109139	0.0522939	0.0160113	0.186105		0.02449	0.00709343	0.000555432	0.0552895	0.00662271	6.91487e-17	ID4
11	p15.2	rs7927346	12335835:13335835	CED	0.00717015	0.00947007	0.00352195	7.96965e-10	0.0200987	0.0032703	0.00486742	AED	0.000977088	0.0381951	0.0115836	0.147046	0.0155053	0.0106928	0.0042375		0.0119008	0.00336964	0.000412776	0.0197058	0.00312731	2.95346e-10	TEAD1	LINC00958, TEAD1
1	p31.1	rs143930681	77497659:78497659	CED	0.0072672	-0.0149277	0.00556094	4.86893e-08	-0.0283469	0.0051953	0.0449324		0.0160445	-0.0187579	0.00778972	0.00543365	-0.0199332	0.0071695	0.131295		-0.0162207	0.00452599	0.000338493	-0.02545	0.00420689	1.45204e-09	AK5	DNAJB4, NEXN, AK5
19	p13.11	rs12104325	17990284:18990284	CED	0.00734658	-0.00948017	0.0035364	4.99117e-07	-0.0165152	0.00328541	0.0691379		0.607016	-0.00652818	0.0126923	0.00948783	-0.0303031	0.0116816	0.0840591		-0.00926751	0.00340664	0.00651978	-0.0175259	0.00316271	3.00033e-08	GDF15	ELL, LRRC25
22	q13.2	rs28489620	41304716:42304716	CED	0.00761652	-0.0100091	0.00375063	8.87243e-09	-0.0200511	0.0034864	0.00163681	AED	0.467765	0.00558784	0.00769538	0.00282559	0.0210084	0.00703496	0.0202945		-0.00701528	0.0033715	0.0374562	-0.0119552	0.00312383	0.000129666	TEF, CTA-223H9.9	CENPM, CYP2D7, DESI1, SMDT1, CCDC134, PMM1, CYP2D8P, CYP2D6, MCHR1, MEI1, SNU13, L3MBTL2, NDUFA6, WBP2NL, TEF
1	q25.1	rs181516391	173797147:174797147	CED	0.00776164	0.0148356	0.00557246	5.86683e-05	0.0207979	0.00517593	0.0278396		5.80343e-05	-0.0858447	0.0213481	0.0116502	-0.0506388	0.0200734	0.0866676		0.00841326	0.0053918	0.11867	0.0163444	0.005012	0.00110997	RABGAP1L	PRDX6, SERPINC1, SLC9C2, DARS2, RC3H1
11	q13.1	rs44205	65064786:66064786	SSE	0.00781279	-0.00978658	0.00367904	1.73216e-09	-0.0205912	0.00341966	0.00227005	CED	0.00272002	-0.0242966	0.00810439	0.000471406	-0.0260334	0.00744497	0.027254		-0.0122658	0.00335002	0.000250817	-0.0215394	0.00310752	4.16832e-12	OVOL1, CFL1	OVOL1-AS1, CTSF, OVOL1, MAP3K11, LTBP3, PCNX3, KRT8P26, CTSW, SIPA1
13	q34	rs1135496	114552933:115552933	CED	0.00793453	-0.0156363	0.00588966	3.35129e-08	-0.0303071	0.00548819	0.00727689		0.567123	-0.00525751	0.00918662	0.00743403	-0.022611	0.00844678	0.00923181		-0.012613	0.00495819	0.010963	-0.0280226	0.00460209	1.13551e-09	UPF3A	UPF3A, CDC16, RASA3
10	q26.13	rs4962424	126230214:127230214	CED	0.00807023	0.00978733	0.00369452	7.89686e-09	0.0198937	0.00344724	0.0104528		0.00014394	0.0321062	0.00844512	0.0524704	0.0151134	0.00779321	0.00351314		0.0133726	0.00338479	7.78921e-05	0.0191114	0.00315259	1.34319e-09	CTBP2	ZRANB1, CTBP2
6	p21.32	rs377763	31699144:32699144	CED	0.00819981	0.011131	0.0042103	1.36825e-11	0.0265198	0.0039221	0.00600247		0.183322	0.0103511	0.00777915	0.00025071	0.0261944	0.00715332	0.00244895		0.0109543	0.00370276	0.00309226	0.0264446	0.00343909	1.47798e-14	NOTCH4, XXbac-BPG154L12.4	ATF6B, CLIC1, LST1, HLA-DQA1, HLA-H, HLA-DRB9, CUEDC2, RNF5, HLA-DRB5, BTN3A2, HLA-DQB1-AS1, HLA-DOB, HSPA1B, GPANK1, HLA-C, HCP5, C4A, VWA7, CSNK2B, TNXA, IER3, CYP21A1P, SLC44A4, TNXB, HLA-DQB1, BAG6, HLA-DPB2, DDAH2, HLA-DRB1, C4B, PSMB9, PRRC2A, HLA-DQA2, CYP21A2, PBX2, NOTCH4, LY6G5C, VARS2, HLA-B, HLA-DPB1, SKIV2L, APOM, HLA-DRB6, AGER, B2M
6	p21.33	rs805262	31128733:32128733	AED	0.00849839	0.00952126	0.00361801	3.74875e-07	0.0170575	0.00335679	0.0579354		3.00937e-05	-0.0324209	0.00776857	0.0174347	-0.0170854	0.00718629	0.0110589		0.00204553	0.00327976	0.532836	0.0109421	0.00304135	0.000320939	C6orf47, GPANK1	EHMT2, C6orf48, ATF6B, DDR1, LINC00243, LST1, HLA-DQA1, STK19B, RNF5, DDX39B, ATP6V1G2, HLA-DRB5, HLA-DQB1-AS1, HSPA1B, GPANK1, AIF1, HCP5, C4A, CSNK2B, LY6G5B, IER3, TNXB, HSPA1L, HLA-DQB1, BAG6, HLA-DRB1, C4B, PSMB9, PRRC2A, CYP21A2, BAT2, LY6G5C, HSPA1A, SKIV2L, HLA-B, C6orf47, FLOT1
19	p13.3	rs11666480	1356554:2356554	CED	0.00861103	0.00917325	0.0034917	2.75664e-09	0.0193013	0.00324623	0.0160895		0.917328	0.00129404	0.0124665	0.101614	-0.0189903	0.0115999	0.0931053		0.0086001	0.00336231	0.0105337	0.0165203	0.00312612	1.25993e-07	KLF16	KLF16, REXO1, ABHD17A, SCAMP4
2	p23.2	rs4665434	28476403:29476403	AED	0.00897532	-0.00931192	0.00356366	1.2301e-08	-0.0189182	0.00332145	0.00650891		0.1373	0.0147254	0.00990968	0.0287793	0.0200357	0.00916306	0.0363689		-0.00655933	0.00335342	0.0504634	-0.0143943	0.00312263	4.03302e-06	PPP1CB	TRMT61B, PLB1, WDR43, CLIP4, SPDYA, PPP1CB, TOGARAM2
6	p21.31	rs187618215	35300666:36300666	CED	0.00927238	0.0358988	0.0137973	1.57763e-11	0.0865883	0.012845	0.00716754	SSE_Female	0.86238	0.0043612	0.0251589	0.0191076	0.053836	0.0229723	0.0353336		0.0286069	0.0120975	0.0180453	0.0787873	0.0112114	2.10373e-12	LHFPL5	UHRF1BP1, DEF6, SLC26A8
1	q31.1	rs815163	189794726:190794726	CED	0.00928302	0.0115714	0.00444801	3.28669e-06	0.0191341	0.00411293	0.0769098		0.212619	0.00990921	0.00795014	0.000530017	0.0254463	0.007343	0.0151583		0.0111751	0.00388176	0.00399089	0.0206415	0.00358838	8.80267e-09	RP11-547I7.1
5	q23.2	rs245158	126747600:127747600	CED	0.00937355	-0.0231381	0.0089056	0.764969	-0.00250632	0.00838338	0.0916263		0.00361321	-0.0575979	0.019791	0.95855	0.000939367	0.0180739	0.0144789		-0.0289407	0.00812126	0.000365839	-0.00189625	0.0076051	0.803099	CTC-228N24.1	FBN2
6	q25.2	rs9688977	153836892:154836892	CED	0.0101776	0.0126336	0.00491623	1.92552e-08	0.0257617	0.00458491	0.031236		0.00229722	0.0500594	0.0164178	0.964879	-0.000674207	0.0153117	0.00788529		0.0157133	0.00470961	0.000848599	0.0235864	0.00439223	7.87207e-08	OPRM1
19	p13.3	rs8107139	2962045:3962045	CED	0.0106471	0.00951882	0.00372688	1.18206e-07	0.0183727	0.00346887	0.0107789		0.284505	0.00822369	0.00768375	0.00047902	0.0245538	0.00703044	0.017567		0.00927216	0.00335325	0.00569015	0.0195829	0.00311081	3.07199e-10	NFIC	NFIC, MFSD12, C19orf71, SMIM24, CHST1
11	q24.1	rs11218751	122052486:123052486	CED	0.0108531	0.00915589	0.00359418	1.18045e-05	0.0147117	0.00335785	0.00495126		0.618982	0.010129	0.020368	0.00408495	0.0545631	0.0190003	0.0287802		0.00918528	0.00353949	0.00945685	0.0159186	0.00330661	1.47799e-06	UBASH3B	MIR100HG, UBASH3B
20	p12.3	rs2145270	6121685:7121685	AED	0.0109323	0.0090895	0.00357167	0.102188	-0.00541632	0.00331406	0.00290923		0.763121	0.00272273	0.00903399	0.0160647	0.0202449	0.00840895	0.0243144		0.00822885	0.0033215	0.0132326	-0.00196639	0.00308325	0.523627	CASC20, RP5-859D4.3
1	p13.2	rs197419	111815450:112815450	CED	0.0112698	0.00900354	0.00355274	1.91735e-07	0.0172027	0.00330354	0.0324269		0.0349335	0.0236651	0.0112199	3.39062e-05	0.0426713	0.0102923	0.0148478		0.0103396	0.003387	0.00226763	0.0195815	0.00314548	4.80723e-10	KCND3	INKA2, DDX20
13	q31.1	rs1415401	85848555:86848555	CED	0.0115014	-0.01018	0.00402833	2.08781e-08	-0.0210435	0.00375455	0.00120771		0.023825	0.0192667	0.0085249	0.000482719	0.027258	0.00780931	0.0329628		-0.004805	0.00364217	0.187079	-0.0119749	0.00338378	0.000401792	RNU6-72P, SLITRK6	SLITRK6
8	p23.1	rs17151145	9483211:10483211	CED	0.0116418	0.0100624	0.00398851	3.71753e-06	0.0171992	0.00371738	0.0126354		0.000840144	-0.0259799	0.00777949	0.678375	-0.00295354	0.00712238	0.0145135		0.00256039	0.00354923	0.470667	0.0128847	0.00329552	9.2385e-05	MSRA	MSRA, AF131215.2
12	q24.31	rs2280574	121992978:122992978	CED	0.0119274	-0.0110419	0.0043916	2.22109e-11	-0.0272615	0.0040743	0.00139293	AED	0.230503	0.00915978	0.00763897	0.00016044	0.026412	0.00699717	0.0038656		-0.00602371	0.00380728	0.113614	-0.0136713	0.00352091	0.00010322	BCL7A	PRSS3, MLXIP, AC156455.1, LRRC43, BCL7A
10	q26.13	rs6585827	123665615:124665615	AED	0.0126104	0.00865297	0.00346866	3.31768e-09	0.0191114	0.00323082	0.0092249		0.0773978	0.0188872	0.0106946	0.790586	0.00261219	0.00983684	0.0385035		0.00962709	0.00329946	0.00352533	0.0175049	0.0030695	1.17826e-08	PLEKHA1	ARMS2, PLEKHA1, HTRA1
2	p23.3	rs11125502	23939917:24939917	AED	0.0126492	0.014647	0.00587401	0.000649301	0.0187203	0.0054895	0.0137681		0.00250783	-0.0237097	0.00784404	0.585291	0.00394753	0.00723419	0.00477236		0.000865696	0.0047018	0.853919	0.0133222	0.004373	0.0023155	AC009228.1	PFN4, C2orf84, ITSN2, FAM228A, SF3B6, TP53I3, ATAD2B, AC009228.1, AC008073.2, AC008073.1, UBXN2A
3	p12.2	rs2603205	82203900:83203900	CED	0.0127279	-0.0115504	0.00463625	5.22852e-06	-0.0196578	0.00431515	0.0204581		0.516612	-0.00516813	0.00796834	0.000129355	-0.0279122	0.0072915	0.0100838		-0.00993625	0.00400731	0.0131555	-0.0217989	0.00371357	4.35623e-09	RP11-260O18.1, CYP51A1P1
5	q23.3	rs200148803	129943182:130943182	CED	0.0131448	0.00876887	0.00353605	5.61081e-08	0.0179029	0.00329643	0.00073671		0.00271489	-0.0233609	0.00779076	0.00108274	-0.0234194	0.00716557	0.00761299		0.0032806	0.00321991	0.308276	0.0106852	0.00299473	0.000359722	RP11-114H7.3, HINT1
2	p16.1	rs56361700	55634212:56634212	SSE	0.0147522	0.0179481	0.00736052	2.86341e-10	0.0436688	0.00692458	9.68346e-05		0.0140177	-0.0491524	0.0200055	0.762848	-0.00556867	0.0184549	0.00542798		0.00994779	0.0069078	0.149845	0.0375923	0.00648323	6.69535e-09	EFEMP1
5	q23.3	rs6595799	126908683:127908683	AED	0.0151185	-0.00841599	0.00346401	0.587347	0.00175187	0.00322816	0.0317634		0.00447854	0.0223607	0.0078665	0.500641	-0.00489656	0.00727045	0.000954226		-0.00341741	0.00317025	0.28105	0.000657008	0.0029504	0.823782	CTC-228N24.3	LINC01184, FBN2, HIC1, SLC12A2
6	q22.32	rs2184968	126260994:127260994	AED	0.0151726	-0.00842686	0.00347033	0.242526	0.00378478	0.00323845	0.0100914		0.517299	0.00562045	0.00867994	0.00977824	0.0206815	0.00800461	0.0374617		-0.00649088	0.00322233	0.0439734	0.00616142	0.00300207	0.0401316	CENPW, MIR588	CENPW
20	q11.22	rs6088638	32970514:33970514	SSE	0.0154268	0.0111032	0.00458388	4.90206e-10	0.0264974	0.0042583	8.15981e-06	SSE_Female	0.668653	0.00429965	0.0100459	0.000144817	0.0354524	0.00932923	0.00237609	SSE	0.00993078	0.00417026	0.0172501	0.0280414	0.00387383	4.53083e-13	ACSS2	TRPC4AP, MAP1LC3A, PIGU, PROCR, GGT7, TP53INP2, EDEM2, MYH7B, EIF6
6	p21.31	rs59144247	34253276:35253276	CED	0.0156262	0.0116392	0.00481446	4.91038e-09	0.0262745	0.00449102	0.026224	AED	0.00544773	0.0224188	0.00806583	0.00255114	0.022669	0.00751279	0.0594316		0.0144709	0.00413402	0.000464476	0.0253253	0.00385478	5.03708e-11	SNRPC, UHRF1BP1
13	q12.11	rs9579775	20116557:21116557	CED	0.0157858	0.00922544	0.00382187	1.04608e-05	0.01568	0.00355755	0.095852		0.468208	0.00991882	0.0136735	0.00172424	0.0391919	0.0125045	0.0544524		0.00927569	0.00368079	0.0117347	0.0174406	0.00342176	3.45159e-07	ZMYM2
9	q22.31	rs10821196	95933396:96933396	AED	0.0166119	-0.00898623	0.00375175	0.00021335	-0.0129634	0.00350104	0.00361884		0.00721352	-0.0204107	0.0075961	0.604102	0.00363788	0.00701597	0.000639404		-0.0112266	0.00336383	0.000845505	-0.00965366	0.00313266	0.00205883	PHF2
2	p16.3	rs10189177	50244732:51244732	AED	0.016644	-0.00862718	0.00360291	1.01793e-06	-0.0163851	0.00335189	0.0509802		0.218669	-0.00976741	0.00794036	0.00527799	-0.0203643	0.00729979	0.0651446		-0.00882186	0.00328096	0.00717078	-0.017078	0.00304611	2.06472e-08	NRXN1
9	q33.1	rs2491646	120225410:121225410	CED	0.0171001	-0.00830183	0.00348148	2.97196e-05	-0.0135133	0.00323617	0.171909		0.386016	-0.00677523	0.00781568	0.0073498	0.0192927	0.00719689	0.00296269		-0.00804907	0.00318023	0.0113748	-0.00799569	0.00295151	0.00674821	RP11-281A20.1, TPT1P9	TLR4
3	p21.31	rs186723383	50034722:51034722	CED	0.0172727	-0.0534331	0.0224426	1.49608e-09	-0.126809	0.0209772	0.0169152		0.0361087	-0.0943927	0.0450393	0.104122	-0.0667283	0.0410579	0.0353893		-0.0615802	0.020087	0.0021718	-0.114372	0.0186803	9.20532e-10	CACNA2D2
13	q21.1	rs35559811	58166728:59166728	AED	0.0185367	-0.00973762	0.00413532	1.95636e-06	-0.0182527	0.00383619	0.0302941		0.350578	-0.00813948	0.00871948	4.7789e-05	-0.0326002	0.00801654	0.000339617		-0.00944416	0.00373641	0.0114844	-0.020926	0.00346039	1.4729e-09	RNA5SP30, LINC00374
6	q24.1	rs9389985	142153898:143153898	SSE	0.0186697	-0.00904926	0.00384733	1.41406e-12	-0.0253084	0.00357305	0.00177599		0.882318	0.00122769	0.00829335	0.0549814	-0.0146674	0.00764296	0.0364225		-0.00722926	0.00349007	0.0383234	-0.0233999	0.00323681	4.85453e-13	GPR126	ADGRG6
20	q11.22	rs6087571	32412091:33412091	SSE	0.0190933	0.0119756	0.00510965	1.74748e-11	0.0319497	0.0047501	0.000257921	SSE_Female	0.798951	0.00250568	0.00983749	0.000561706	0.0314355	0.00911245	0.0154864	SSE	0.00996359	0.00453447	0.0279991	0.0318398	0.00421217	4.06133e-14	AHCY, CTD-3216D2.4	TRPC4AP, EIF2S2, MAP1LC3A, PIGU, GGT7, TP53INP2, ITCH, MYH7B
12	p13.32	rs11062587	2842708:3842708	CED	0.0202801	-0.0141335	0.00608902	0.00187109	-0.0177012	0.00569169	0.509055		0.00234437	-0.0416211	0.0136778	0.198968	0.0160889	0.0125253	0.000897606		-0.01868	0.00556271	0.000784869	-0.011918	0.00518178	0.0214496	TSPAN9
1	p32.3	rs79711866	54441934:55441934	AED	0.0204476	-0.011964	0.00516122	3.79514e-08	-0.0262987	0.00478127	0.00496546		0.227727	-0.0160148	0.0132765	0.0101494	-0.0314983	0.0122523	0.0366974		-0.0124958	0.00481051	0.00938761	-0.0269859	0.00445414	1.37307e-09	RP4-705F19.1, AC099796.1
4	p15.31	rs9684942	19733035:20733035	CED	0.0206237	0.0113255	0.00489259	1.61378e-05	0.0196701	0.004561	0.00350517		1.72489e-05	0.0506714	0.0117883	0.00281321	0.032246	0.0107932	0.0116413		0.0171072	0.00451885	0.000153255	0.0215756	0.00420128	2.81431e-07	RP11-339D20.1, SLIT2	SLIT2
1	q25.3	rs6673341	184155649:185155649	CED	0.0216234	0.00800303	0.00348421	1.49515e-05	0.0140406	0.00324299	0.204647		0.250086	0.0089388	0.00777178	0.00377332	0.0207064	0.00714833	0.0656639		0.00815963	0.00317933	0.0102741	0.0151784	0.00295328	2.75483e-07	SNORD112, EDEM3	EDEM3
18	q11.2	rs7230974	22291902:23291902	CED	0.0227512	0.00793602	0.00348437	0.000429991	0.0114339	0.00324731	0.0953388		0.00208673	-0.024468	0.00794972	0.45756	0.00548089	0.00737791	0.00225773		0.00271412	0.00319129	0.395059	0.0104678	0.00297216	0.000428372	ZNF521
12	q14.1	rs11173522	60453472:61453472	CED	0.0229379	0.00962535	0.00423187	2.43342e-07	0.020316	0.00393497	0.0123729		0.00557722	0.0211053	0.0076142	0.54408	0.00428327	0.00706041	0.0127818		0.0123346	0.00369896	0.000854169	0.0165162	0.00343719	1.5463e-06	RP11-154D9.1, RP11-471N19.1
1	q31.3	rs581571	194622910:195622910	CED	0.0234507	-0.00825879	0.0036446	9.05766e-08	-0.0181228	0.00339069	0.0106903		0.38899	-0.00668988	0.00776573	0.00931389	-0.018582	0.00714574	0.0609836		-0.0079756	0.00329931	0.015634	-0.0182072	0.00306332	2.78811e-09	AL357932.1, RP11-476B1.1
16	p12.3	rs11074452	19870168:20870168	SSE	0.0244541	-0.00781553	0.00347366	3.33926e-10	-0.0202738	0.00322703	0.00859896	AED	0.660245	0.00334629	0.00761247	0.00593865	0.0193514	0.00703356	0.00456896		-0.00589194	0.0031602	0.0622625	-0.0133831	0.00293306	5.04611e-06	UMOD, PDILT
14	q32.32	rs3759584	103490799:104490799	CED	0.0247311	-0.00963559	0.00429088	0.000142274	-0.0151497	0.00398229	0.0401991		0.00819673	-0.0248136	0.0093848	0.0670445	-0.0156337	0.00853637	0.0201166		-0.0122599	0.00390234	0.00167982	-0.0152362	0.0036089	2.42317e-05	CKB, RP11-600F24.7	ZFYVE21, TRMT61A, APOPT1, PPP1R13B, TDRD9, XRCC3, CKB, AL049840.1, KLC1, BAG5, MARK3
6	p21.33	rs3132579	30440989:31440989	CED	0.0254838	0.00989738	0.00443032	3.76615e-09	0.024353	0.00413154	0.0170203		0.00104954	0.0249333	0.00760812	0.138119	0.0103618	0.00698767	0.0216198		0.0137048	0.00382851	0.000344019	0.0207288	0.0035564	5.58993e-09	HCG21, MUC21	DDR1, LINC00243, TRBV5-1, HLA-DQA1, TRBV19, HLA-H, TRAV17, HLA-G, RNF5, CCHCR1, DDX39B, HLA-E, HLA-S, TUBB, TRBV7-3, BTN3A2, HCG27, TRIM10, ZNRD1, XRCC6, POU5F1, CD248, RNF5P1, HLA-C, HCP5, C4A, IER3, SLC44A4, TRAV12-2, FBRSL1, MICB, TRIM26, HLA-DQB1, HLA-DRB1, PSMB9, SFTA2, PRRC2A, VARS2, HLA-B, HLA-DPB1, FLOT1, B2M
10	q26.3	rs7081254	132455696:133455696	SSE	0.0256788	-0.00955754	0.00428387	1.12634e-08	-0.0228097	0.00399416	0.0126262		0.685204	0.00424172	0.0104637	0.0262142	0.021162	0.0095191	0.0847083		-0.00757665	0.00396449	0.0559879	-0.016227	0.00368308	1.05379e-05	TCERG1L	TCERG1L-AS1, TCERG1L
3	p22.1	rs2041376	41939589:42939589	AED	0.0256805	-0.00824345	0.00369491	2.98471e-08	-0.0190753	0.00344161	0.0197926		2.17901e-05	0.0367274	0.00864921	0.0573726	0.0151901	0.00799261	0.00894119		-0.00130303	0.00339785	0.70136	-0.0137157	0.00316101	1.43117e-05	LYZL4	VIPR1
11	q13.1	rs34292685	63549021:64549021	SSE	0.0260801	-0.0104302	0.00468766	1.52832e-09	-0.0263803	0.00436641	0.00364903	CED	8.9662e-05	-0.0401899	0.0102591	0.0033837	-0.0278148	0.00949082	0.00680296		-0.0155703	0.00426366	0.000260334	-0.0266309	0.00396674	1.89955e-11	GPR137	CCDC88B, NUDT22, TRMT112, PPP1R14B, KCNK4, PLCB3, AP003774.1, CATSPERZ, RPS6KA4, TRPT1, STIP1, PRDX5, FERMT3, FKBP2, MACROD1
12	q24.31	rs6489191	122654039:123654039	CED	0.0265111	0.00779513	0.00351344	2.17997e-08	0.0183578	0.00327975	0.0279742	CED	0.724386	-0.0032901	0.00933082	5.86022e-08	-0.0469032	0.00864731	0.000303731		0.0064186	0.00328807	0.0509277	0.0101505	0.00306659	0.000932915	HCAR1	RILPL2, RSRC2, ZCCHC8, KNTC1, HCAR1, HCAR3
20	p11.1	rs2252934	25457535:26457535	SSE	0.0269977	0.00775667	0.00350731	2.30857e-09	0.0194804	0.00326046	0.000956842		0.0101062	0.01978	0.00768954	0.107446	0.0113845	0.00707193	0.0143858		0.00982724	0.00319105	0.00207259	0.0180612	0.00296092	1.06166e-09	RP4-760C5.5, RP4-760C5.3	NINL, FAM182A, ENTPD6, AL078587.1, ABHD12, ZNF337, AL390198.2, NANP, GINS1, FAM182B, PYGB
7	q31.1	rs2045293	113850102:114850102	AED	0.0278325	0.00959324	0.00436124	2.69296e-07	0.0208449	0.00405233	0.00210356		0.36225	0.0105679	0.0115991	0.0052684	0.029638	0.0106218	0.0128025		0.00971396	0.00408222	0.0173323	0.0219621	0.00378615	6.60583e-09	FOXP2, MDFIC
11	q13.1	rs10896012	64778461:65778461	SSE	0.0302474	0.00910694	0.00420284	6.0318e-11	0.0255938	0.00391144	0.000281244		0.819923	0.00392302	0.017233	0.000271553	0.0571298	0.0156892	0.00604424		0.00881592	0.00408316	0.0308432	0.0274392	0.00379527	4.83568e-13	MALAT1, SNRPGP19	CTSW, MALAT1, SNX32, RNASEH2C, LTBP3, AP000769.1, FIBP, NEAT1, EHBP1L1, CAPN1, SSSCA1, MAP3K11, SPDYC
5	q34	rs4921301	159484492:160484492	CED	0.032545	-0.00920741	0.00430722	2.30576e-06	-0.0189379	0.00400825	0.00414529		0.00198349	-0.030006	0.00970144	0.0353089	-0.0189238	0.00899051	0.0184314		-0.0126321	0.00393667	0.00133278	-0.0189356	0.0036609	2.3113e-07	MIR146A, ATP10B
22	q13.32	rs10854853	48374412:49374412	CED	0.0348316	0.00741641	0.00351434	1.8419e-05	0.0140233	0.00327392	0.0496408		0.00293054	-0.0239683	0.00805615	0.336631	-0.00714829	0.00743951	0.00955814		0.00239882	0.00322119	0.456453	0.0105884	0.00299659	0.00041014	RP11-536P6.3, FAM19A5	FAM19A5
18	q21.32	rs633647	57348184:58348184	AED	0.0353875	-0.00903005	0.00429202	9.05993e-08	-0.0213774	0.00399964	0.0353228		0.00505582	-0.035958	0.0128254	0.964096	-0.000536309	0.0119142	0.0215122		-0.011742	0.00407016	0.00391533	-0.0192666	0.00379169	3.74933e-07	RNU4-17P, RP11-795H16.2
16	p13.3	rs7200589	0:849331	CED	0.0354403	-0.00820994	0.00390335	6.3365e-10	-0.022429	0.00362803	0.00762547		0.0156647	-0.0208522	0.00862816	0.0390318	-0.016375	0.00793395	0.0344294		-0.0103578	0.00355635	0.00358586	-0.021382	0.00329943	9.14095e-11	AXIN1	PDIA2, TMEM8A, DDX11L10, HBZ, METTL26, AXIN1, HBQ1, NME4, HBM
3	q29	rs13314605	194364804:195364804	CED	0.0355844	-0.00841417	0.00400358	1.10209e-08	-0.0212472	0.00371815	0.00940362		0.598758	-0.0074877	0.01423	0.00142441	-0.0417795	0.0130975	0.00263054		-0.00834621	0.00385395	0.0303399	-0.0227785	0.00357682	1.91051e-10	XXYLT1	XXYLT1
6	p21.31	rs542403917	33908986:34908986	CED	0.0359397	0.0250063	0.0119212	5.52946e-08	0.0605367	0.0111412	0.0244649		0.00327779	0.0327252	0.0111286	0.967932	0.000415329	0.010331	0.0166772		0.0291309	0.00813489	0.000342311	0.0282107	0.00757537	0.000196088	RPS10, PACSIN1
17	q21.32	rs4794333	45545495:46545495	AED	0.0367551	-0.00736186	0.00352497	6.04254e-09	-0.0191365	0.0032904	0.00818673		0.0161613	-0.026067	0.0108369	0.0028094	-0.0295154	0.00987784	0.0190465		-0.00915157	0.0033521	0.00633141	-0.0201731	0.00312176	1.03254e-10	CDK5RAP3	SNX11, PNPO, LRRC46, TBKBP1, CDK5RAP3, NFE2L1, SP2, COPZ2, MRPL10, CBX1, SP6, SCRN2, SKAP1
14	q32.12	rs6575340	93523972:94523972	CED	0.0375238	-0.00726192	0.00349125	2.22126e-09	-0.0194762	0.00325633	0.000342477	CED	1.65174e-05	-0.0346196	0.00803598	0.0311143	-0.0159334	0.00739135	0.0205678		-0.0116058	0.00320211	0.00028962	-0.0189003	0.00297995	2.26072e-10	UNC79	UBR7, BTBD7
6	p12.3	rs544586525	50503250:51503250	CED	0.0392209	0.0395309	0.0191723	0.0133316	0.0446667	0.0180485	0.138539		0.000340992	0.139418	0.0389177	0.309565	0.0366519	0.0360695	0.0261952		0.0590383	0.0171986	0.000597504	0.0430618	0.0161406	0.00763233	FTH1P5, RP3-437C15.2
16	q23.3	rs7206608	82372628:83372628	CED	0.0406867	0.00757491	0.00370099	8.40805e-07	0.0169482	0.0034407	0.00422485		0.447041	0.00702037	0.00923288	0.00666403	0.0230079	0.0084796	0.0355737		0.00749814	0.00343528	0.0290587	0.0178048	0.00318824	2.34313e-08	CDH13
7	p22.2	rs1011189	2634524:3634524	CED	0.0407897	0.0103161	0.00504289	2.18238e-08	0.0262995	0.00469875	0.0204007	AED	0.386346	0.00961988	0.0111049	0.0018063	0.0319398	0.0102353	0.031688		0.0101971	0.00459162	0.0263646	0.0272813	0.00427027	1.67355e-10	AC024028.1, AC091801.1	CARD11, SDK1
17	p13.3	rs12937079	1364044:2364044	CED	0.0422634	-0.00746294	0.00367463	3.55173e-07	-0.017455	0.00342811	0.0467781		0.0863516	0.0217292	0.01267	0.00327499	0.0344502	0.0117144	0.094943		-0.00519796	0.0035292	0.140793	-0.0133606	0.00329012	4.89033e-05	RTN4RL1
1	q32.1	rs116300643	202989485:203989485	AED	0.042538	0.00946424	0.00466624	4.4802e-07	0.0219555	0.00434976	0.000152237		0.051989	0.017608	0.00906091	0.308117	0.00850799	0.00834776	0.0674908		0.0111713	0.00414845	0.00708356	0.019084	0.00385749	7.52683e-07	OPTC, ATP2B4
4	q31.1	rs1912528	140445966:141445966	CED	0.0435845	-0.00796234	0.0039455	1.32869e-07	-0.0193259	0.00366366	0.0271568		0.00147877	-0.0252998	0.00795819	0.00698364	-0.0197875	0.0073348	0.015682		-0.011383	0.00353491	0.00128113	-0.0194181	0.00327755	3.13102e-09	MAML3	MAML3
1	q25.2	rs72717429	177269090:178269090	CED	0.0456943	0.0207302	0.0103743	4.98077e-06	0.0444044	0.0097256	0.00805576		0.0203244	0.0314271	0.0135437	0.434801	0.00985246	0.012615	0.085488		0.0246857	0.00823581	0.00272333	0.0315237	0.00770232	4.26292e-05	RP11-63B19.1, SEC16B
6	p21.1	rs567230078	43088227:44088227	CED	0.0457544	-0.0214361	0.0107306	5.54959e-06	-0.0452649	0.00996368	0.0806317		0.453446	0.0105378	0.0140562	0.0554729	-0.0246975	0.0128955	0.0224737		-0.00966317	0.00852928	0.257239	-0.0375764	0.00788441	1.88004e-06	GTPBP2
17	p13.2	rs8081417	3402650:4402650	CED	0.0457729	0.00746077	0.00373506	8.34285e-09	0.0200125	0.0034734	0.00495326		2.72549e-05	0.032837	0.00782604	0.274472	0.00782137	0.00715695	0.000900311		0.0121686	0.00337084	0.000306248	0.0176885	0.00312484	1.50842e-08	RP11-459C13.1, ZZEF1	ZZEF1, ANKFY1, UBE2G1
9	p21.1	rs60131931	29208929:30208929	CED	0.0479689	-0.00703392	0.00355669	1.08997e-05	-0.0146021	0.00331969	0.00137535		0.131804	0.0118876	0.00788788	0.0060182	-0.0198318	0.00721963	0.00063643		-0.00383688	0.00324232	0.236661	-0.0155148	0.00301612	2.68989e-07	RP11-48L13.1, RP11-460C6.1
18	q12.1	rs1941697	30751276:31751276	AED	0.0504576	0.00680976	0.00348133	3.46991e-06	0.0150529	0.00324347	0.00162601		0.0975068	0.0214622	0.0129516	0.202502	-0.015236	0.0119547	0.0186664		0.00779708	0.00336199	0.0203851	0.0129762	0.0031303	3.39308e-05	ASXL3	AP1S1, EFCAB1, TMEM41A, GRM8
2	p22.2	rs3770781	36578839:37578839	AED	0.05064	0.00710098	0.00363309	1.45777e-07	0.0177721	0.00338	0.00114072		0.0185319	0.0192643	0.00818038	0.367948	-0.00678459	0.00753563	0.00958899		0.00910487	0.00332036	0.00610408	0.0136591	0.00308398	9.46449e-06	STRN	CEBPZ, STRN, VIT
6	q22.31	rs4895799	125552729:126552729	CED	0.0506903	0.00690625	0.00353422	3.34238e-08	0.0181877	0.00329325	0.0070945		0.619386	-0.00633584	0.0127552	0.05062	0.0227214	0.0116237	0.0461111		0.00596209	0.0034059	0.0800285	0.0185246	0.00316853	5.02257e-09	RP11-624M8.1	AL365259.1, NCOA7, IRAK1BP1, HEY2
20	q11.22	rs143384	33525756:34525756	SSE	0.051002	0.00686996	0.00352039	4.32883e-16	0.0267738	0.00329333	3.6462e-05	SSE_Female	0.165928	0.0116401	0.00840176	0.000148619	0.0294739	0.00776913	0.0103265	SSE	0.00758236	0.00324689	0.0195293	0.0271851	0.00303215	3.08591e-19	GDF5	UQCC1, FAM83C, CPNE1, MMP24, MAP1LC3A, PROCR, SPAG4, GGT7, EDEM2, CEP250, GDF5, RBM39, SCAND1, EIF6
6	p21.32	rs17843560	32109388:33109388	AED	0.0514218	0.0110331	0.00566393	1.0585e-08	0.0301684	0.00527296	0.00339734		0.257042	-0.0998874	0.0881285	0.0221234	-0.184018	0.0804159	0.00248996		0.0105768	0.00565227	0.06131	0.0292514	0.00526166	2.70775e-08	HLA-DQA1	HLA-DQA1
7	p22.3	rs3800872	1610272:2610272	CED	0.0543059	-0.0082218	0.00427239	2.20385e-08	-0.0222484	0.00397618	0.0104136		0.544253	0.00555793	0.00916544	0.00265985	-0.0254364	0.00846548	0.00293461		-0.0057621	0.00387235	0.136748	-0.0228246	0.00359896	2.2681e-10	MAD1L1	GNG4, MAD1L1, NCKAP5, PDE4DIP, STARD3
8	p23.2	rs62489440	4320914:5320914	CED	0.0548706	0.0089761	0.00467526	7.88677e-08	0.023304	0.00433973	0.0161672		0.689398	-0.0062988	0.0157598	0.0261353	0.0319846	0.0143798	0.0267035		0.00774056	0.00448219	0.084175	0.0240286	0.00415465	7.31412e-09	CSMD1	CSMD1
16	p11.2	rs9746755	30019628:31019628	CED	0.0549673	0.00667654	0.00347891	1.40629e-07	0.0170553	0.0032396	0.0290142		0.0527705	0.0174246	0.00899629	0.000289425	0.0299996	0.008276	0.0015934		0.00807473	0.00324475	0.0128264	0.0187752	0.00301671	4.85454e-10	ITGAL	ITGAL, CCDC189, ZNF689, ZNF668, HIP1, INO80E, MAPK3, STX4, BCKDK, SEPHS2, KAT8, STX1B, ITGAX, HSD3B7, VKORC1
8	q24.22	rs894344	135112745:136112745	SSE	0.0592579	-0.00665335	0.00352722	1.45668e-09	-0.0198289	0.00327783	4.04239e-05		0.011316	0.0222246	0.00877426	0.0177681	0.0192109	0.00810412	0.00441363		-0.00263587	0.00327268	0.42058	-0.0143402	0.00303869	2.36758e-06	ZFAT-AS1	ZFAT
6	q12	rs117050940	69400842:70400842	SSE	0.0597244	0.00925412	0.00491499	1.2095e-07	0.0241522	0.00456369	0.00923796		0.471906	0.0073216	0.0101775	0.010379	-0.0240257	0.00937385	0.00228534		0.00888865	0.00442591	0.0446091	0.0149208	0.00410324	0.000276518	BAI3
2	p22.2	rs4670169	36523044:37523044	SSE	0.0603175	0.0068394	0.00364093	2.35412e-08	0.018908	0.00338612	0.0132118		0.0475755	-0.0301053	0.0151954	0.407906	-0.011678	0.0141108	0.0394209		0.0048335	0.00354071	0.172214	0.0172426	0.00329265	1.63462e-07	VIT	CEBPZ, VIT
2	q31.1	rs79869125	175922238:176922238	CED	0.0610269	-0.0106026	0.0056598	4.12101e-07	-0.0266868	0.00527046	0.00655274		0.129264	-0.0156122	0.0102911	0.000337528	-0.0342352	0.00954971	0.00649035		-0.011766	0.00495927	0.0176672	-0.0284492	0.00461436	7.03243e-10	AC096649.3, EXTL2P1
2	p21	rs935376	46539991:47539991	CED	0.0616803	-0.00653	0.00349459	2.5034e-05	-0.0137573	0.00326421	0.0564073		0.00695015	-0.020769	0.00769396	0.853544	-0.00130011	0.00704286	0.000715721		-0.00896511	0.00318177	0.00483772	-0.0115545	0.00296158	9.56088e-05	RP11-333I13.1, LINC01118	CRIPT
1	q43	rs12037698	243084345:244084345	SSE	0.0619338	-0.00928343	0.00497296	1.46682e-08	-0.0262103	0.00462619	2.63554e-05		0.0127469	0.125602	0.0504243	0.813337	-0.0107065	0.0453428	0.00636847		-0.00798412	0.00494895	0.10668	-0.0260506	0.0046023	1.51073e-08	SDCCAG8	CEP170, SDCCAG8
4	q31.3	rs750090	152431436:153431436	CED	0.0628009	-0.00680106	0.00365528	5.35469e-10	-0.0211304	0.00340337	0.0038375		0.00614125	-0.0272765	0.00995375	0.883074	-0.00134699	0.00915856	0.0176563		-0.00923416	0.00343123	0.00711939	-0.01873	0.00319022	4.33021e-09	RNA5SP169, RP11-18H21.1	AC097375.2, FAM160A1, GATB
8	p21.2	rs55968245	22857951:23857951	SSE	0.0635579	0.00688349	0.00371022	1.04404e-09	0.0210558	0.00345017	0.000118682	SSE_Female	0.648918	-0.00442498	0.00971945	4.64872e-05	0.0361943	0.00888627	0.000908759	SSE	0.00544522	0.00346626	0.116201	0.0230389	0.00321626	7.87796e-13	CTC-756D1.3, SLC25A37	NKX3-1, ENTPD4, DNAJC5, LOXL2
10	q23.33	rs11187838	95538686:96538686	CED	0.0675095	-0.0100068	0.00547335	2.12398e-06	-0.0242049	0.00510501	0.05783		0.0412422	-0.028497	0.0139611	0.0813697	-0.0228688	0.0131216	0.0213048		-0.0124701	0.00509574	0.0143986	-0.0240293	0.00475763	4.40243e-07	PLCE1	NOC3L, HELLS
3	p21.31	rs35917071	49465609:50465609	CED	0.0688735	-0.0126231	0.00693861	0.000163111	-0.0242999	0.00644511	0.00415359		0.539658	0.0104791	0.0170854	0.0106895	0.0399495	0.0156493	0.00612131		-0.00935234	0.0064287	0.14573	-0.0149825	0.00595948	0.0119351	MON1A	RBM6
4	q12	rs4864900	52428979:53428979	AED	0.0724797	-0.00633009	0.00352434	2.1414e-09	-0.0195969	0.00327325	0.0049046		0.00086785	0.0278752	0.00836965	0.00937243	0.0200256	0.00770725	0.0249809		-0.00117849	0.00324812	0.716738	-0.0135423	0.0030128	6.95938e-06	SPATA18	ZAR1, OCIAD2, SLC10A4, SPATA18, SGCB, DCUN1D4
17	q21.32	rs72827899	46051866:47051866	CED	0.0758251	-0.00728444	0.00410286	1.96849e-08	-0.0214702	0.00382373	0.0114268		0.068209	-0.0153833	0.00843527	0.0084558	-0.0203451	0.00772569	0.0583615		-0.00883389	0.00368957	0.0166527	-0.0212488	0.00342696	5.62887e-10	RP11-433M22.2, Y_RNA	SNX11, HOXB3, PNPO, LRRC46, HOXB2, HOXB4, TBKBP1, CDK5RAP3, NFE2L1, SP2, COPZ2, MRPL10, CBX1, SP6, SKAP1
1	p31.1	rs11162409	78006970:79006970	SSE	0.0819327	-0.00704322	0.00404878	3.26662e-08	-0.0207833	0.00376049	0.00549041		0.131467	-0.0134225	0.00889865	0.00352468	-0.023821	0.00816345	0.0708558		-0.00813733	0.00368526	0.0272391	-0.0213151	0.00341553	4.35796e-10	GIPC2	AK5
2	q31.1	rs4668314	171131258:172131258	CED	0.0958699	-0.00593365	0.00356327	3.73582e-08	-0.018254	0.00331703	0.0113812	SSE_Female	0.105728	-0.0125682	0.00776897	7.12603e-05	0.0282717	0.00711694	1.00314e-05		-0.00708675	0.00323885	0.0286664	-0.00995102	0.00300652	0.00093357	AC007405.6	GAD1, AC007277.1, AC007405.1, AC007405.3
20	q11.22	rs6142059	32044327:33044327	CED	0.0970843	0.00578097	0.00348427	2.67151e-07	0.0167147	0.00324844	0.0167012		0.0387137	-0.0213039	0.0103052	0.187339	-0.0126083	0.00956248	0.0614541		0.00300235	0.00330071	0.363029	0.0136809	0.00307581	8.6712e-06	TPM3P2, PIGPP3	MAP1LC3A, PIGU, EIF2S2
14	q24.3	rs10138360	74793386:75793386	CED	0.101222	-0.00807922	0.00492945	0.000265629	-0.0167174	0.00458418	0.0173652		0.0065985	-0.0316509	0.0116508	0.313128	-0.0107688	0.010676	0.0017866		-0.0116582	0.00453982	0.0102293	-0.0157914	0.00421228	0.000177619	YLPM1	NEK9, PROX2, EIF2B2, LTBP2, MLH3, RPS6KL1, AREL1, YLPM1, DLST
1	p13.3	rs11802147	107501307:108501307	AED	0.103421	0.00618306	0.00379678	9.179e-07	0.0173383	0.00353221	0.000138865		0.0286985	-0.0184512	0.00843408	0.761123	0.00235757	0.00775494	0.0346713		0.00203205	0.00346214	0.557249	0.0147644	0.00321447	4.36729e-06	NTNG1
18	q21.32	rs62097787	57481057:58481057	CED	0.105032	-0.00685925	0.00423164	3.54675e-07	-0.0201697	0.00396106	0.0216541		0.00293444	-0.0459229	0.0154375	0.660969	-0.00628204	0.0143236	0.0298929		-0.00958931	0.00408109	0.018789	-0.0191831	0.00381777	5.04249e-07	RP11-396N11.1, MC4R
13	q21.1	rs6561943	57856761:58856761	CED	0.106887	-0.0064834	0.00402107	2.63199e-06	-0.0176053	0.00374759	0.00163947		0.491425	0.00564771	0.00820826	0.00291466	0.0224346	0.00753654	0.00166538		-0.00413557	0.00361105	0.252104	-0.0096676	0.00335562	0.00396396	PCDH17, RNA5SP30
12	q24.31	rs11065389	120937964:121937964	SSE	0.116627	-0.0196984	0.0125539	7.51394e-09	-0.0662328	0.0114604	0.006189		0.516686	-0.0175977	0.0271372	0.0920421	-0.0409016	0.0242774	0.0613386		-0.0193281	0.0113938	0.0898157	-0.0616166	0.0103637	2.75733e-09	HNF1A	CAMKK2, COQ5, P2RX7, RNF10, C12orf43
20	q11.23	rs6141600	34212310:35212310	CED	0.117503	0.00612032	0.00390988	1.30621e-10	0.0234461	0.00364818	0.00119554		0.00443	0.0258722	0.00909072	0.000492176	0.0290382	0.00833173	0.0141797		0.0092037	0.00359176	0.0103937	0.0243458	0.00334186	3.21434e-13	EPB41L1	UQCC1, CPNE1, EPB41L1, RBM39, AAR2, SCAND1
2	q11.2	rs13002946	100301959:101301959	SSE	0.119594	-0.00611502	0.00392874	1.00376e-09	-0.0223236	0.00365415	0.000649568	CED	0.00397992	0.024487	0.00850256	1.2995e-07	0.0414819	0.00785668	0.000513675		-0.000730886	0.00356642	0.837623	-0.010976	0.00331331	0.000924048	AFF3, LINC01104	LONRF2, AFF3
14	q23.3	rs146131663	64636604:65636604	AED	0.121357	-0.027028	0.0174474	9.06706e-07	-0.0794055	0.0161688	0.0276725		0.806885	-0.00681375	0.027874	0.119875	0.0398378	0.0256137	0.0632036		-0.0213376	0.0147891	0.14908	-0.0454283	0.0136725	0.000891839	RP11-973N13.2, PLEKHG3
4	q13.2	rs1383723	67303507:68303507	SSE	0.123754	-0.00650384	0.00422544	1.03272e-08	-0.0224447	0.00392011	0.00185005		0.388075	0.00875402	0.0101422	0.0611065	-0.0174623	0.00932429	0.0285268		-0.00424719	0.00390047	0.276201	-0.0216963	0.00361373	1.92682e-09	RNU6-699P, RP11-584P21.2
17	q12	rs7226064	31737258:32737258	CED	0.127177	-0.00536075	0.00351448	1.98593e-07	-0.0170122	0.00327105	7.37794e-05		0.0210674	-0.019787	0.00857735	0.167861	-0.0110353	0.0080016	0.0755165		-0.00743456	0.00325208	0.0222486	-0.0161564	0.00302782	9.50306e-08	ASIC2
11	q25	rs34535092	132850929:133850929	CED	0.133503	-0.00653215	0.00435349	1.79513e-05	-0.0173008	0.00403369	0.0132924		0.0111103	-0.0253129	0.00996825	0.824361	-0.00203991	0.00919125	0.0430417		-0.00954054	0.0039896	0.0167865	-0.0148362	0.00369364	5.9021e-05	OPCML	OPCML
17	q11.2	rs79461387	28668077:29668077	SSE	0.146007	-0.00568742	0.00391214	2.06709e-10	-0.0231259	0.00363808	8.82946e-05		0.175385	0.0107444	0.00792864	0.000288845	0.0264317	0.00729067	0.0223074		-0.00247017	0.00350831	0.481376	-0.0132459	0.00325529	4.7206e-05	CTD-2349P21.11
8	p21.2	rs72609944	25235735:26235735	CED	0.150344	0.00594864	0.00413581	2.32204e-07	0.019873	0.00384265	0.0136447		0.00415776	0.0253351	0.00883944	0.722345	0.00289353	0.00814323	0.00358829		0.00943039	0.00374606	0.0118218	0.0167807	0.00347517	1.37395e-06	EBF2
18	q11.2	rs7238093	20228158:21228158	SSE	0.158642	0.00596454	0.00423119	1.46491e-16	0.0324361	0.00392685	4.52443e-06	AED	5.46445e-05	-0.0326729	0.00809666	0.00179762	-0.0233094	0.00746623	0.00382428		-0.00232367	0.00375001	0.535492	0.020357	0.00347547	4.70313e-09	CABLES1	CABLES1, RBBP8
12	q23.1	rs670104	99039421:100039421	CED	0.160956	-0.00505837	0.0036083	3.31745e-07	-0.0171468	0.00335905	0.00409945		0.00564384	0.0435745	0.0157424	0.873956	-0.00231157	0.0145715	0.0162139		-0.00263089	0.00351709	0.454443	-0.0163982	0.00327321	5.4476e-07	ANKS1B	ANKS1B
9	q33.3	rs2789520	129454223:130454223	CED	0.161596	-0.00504601	0.00360499	2.35454e-06	-0.0158776	0.00336356	0.00782269		0.00104101	0.0251028	0.00765447	0.616728	0.00352963	0.00705225	0.0190972		0.000427236	0.00326139	0.895777	-0.012281	0.00303593	5.22749e-05	RALGPS1	ZBTB34, SLC2A8, RALGPS1
18	q21.32	rs74394803	57724224:58724224	CED	0.166942	-0.00873795	0.00632221	1.32692e-07	-0.0309258	0.0058624	0.0056112		0.804411	-0.00195047	0.00787609	0.0227955	-0.0165153	0.00725331	0.0216172		-0.00607825	0.00493029	0.217637	-0.0252318	0.00455939	3.12957e-08	AC010928.1, RP11-325K19.2
9	q34.12	rs10901308	133322094:134322094	CED	0.170128	-0.0047977	0.00349738	8.1669e-08	-0.0174193	0.00324768	0.0016635		0.000150777	0.0449121	0.0118494	0.51288	0.00713612	0.0109054	0.00338006		-0.000814249	0.00335432	0.808202	-0.0154189	0.00311259	7.28011e-07	RP11-83J21.3, LAMC3
10	q21.1	rs4595495	53173286:54173286	AED	0.170691	0.00481589	0.00351527	3.26684e-06	0.0152189	0.00327047	0.00528238		0.44618	0.00589718	0.00774103	0.00534716	0.0198294	0.00711881	0.020203		0.00500075	0.00320071	0.118197	0.0160224	0.00297185	6.99169e-08	PRKG1	PRKG1, CSTF2T
14	q23.1	rs1955695	60521891:61521891	SSE	0.171971	-0.00490125	0.00358828	7.05295e-11	-0.0217179	0.00333102	8.25861e-05	SSE_Female	0.552026	0.00827822	0.0139192	9.04555e-05	0.0505752	0.0129175	0.000455887	SSE	-0.00407996	0.00347468	0.240316	-0.0172104	0.0032255	9.51626e-08	RP11-1042B17.3, RP11-1042B17.1	C14orf39, PCNX4
2	p23.3	rs188571496	24187610:25187610	AED	0.174942	0.0049583	0.00365522	0.0001537	0.0128792	0.00340261	0.0473749		0.730877	0.00668389	0.0194321	0.0100589	-0.0466002	0.0181048	0.0189574		0.00501727	0.00359222	0.162503	0.01085	0.00334406	0.00117636	ITSN2, NCOA1
5	q22.2	rs2546109	111662299:112662299	CED	0.178005	-0.00474804	0.00352509	2.0413e-07	-0.0170546	0.00328244	0.00821713		0.832695	0.00192739	0.00912384	0.00207755	0.0260858	0.00847186	0.00292233		-0.003881	0.0032882	0.237889	-0.0114237	0.00306073	0.000189706	APC
16	q23.3	rs12926506	81222413:82222413	AED	0.194705	-0.00602355	0.00464497	1.65148e-06	-0.0207295	0.00432574	0.0205094		0.00983756	-0.0275019	0.0106529	0.927317	0.000895798	0.00981997	0.0249968		-0.0094547	0.00425782	0.0263815	-0.0172152	0.00395868	1.36936e-05	CMIP	CMIP
10	q22.3	rs1720305	79478483:80478483	CED	0.196157	0.00492293	0.0038086	6.75112e-08	0.0191329	0.00354452	0.00631004		0.0764663	-0.01846	0.0104198	0.0143833	-0.023258	0.00950219	0.0524726		0.00216711	0.00357713	0.544632	0.0139549	0.00332099	2.64532e-05	GNAI2P2, LINC00856
17	q24.3	rs2108535	68661145:69661145	CED	0.202308	-0.00441805	0.00346512	5.77111e-05	-0.0129752	0.003226	0.0042587		0.847661	-0.0029476	0.0153437	0.00832792	0.0374323	0.0141864	0.0242213		-0.0043467	0.00338	0.198442	-0.0104967	0.00314569	0.000847304	CASC17
6	p21.32	rs9275588	32180423:33180423	AED	0.208119	-0.00436889	0.00347079	3.56473e-08	-0.0178193	0.00323318	0.00312886	AED	0.783256	0.00213698	0.00776855	0.000136311	0.0271469	0.0071156	0.00879762		-0.00328635	0.0031689	0.299706	-0.0101243	0.00294356	0.000582868	MTCO3P1, XXbac-BPG254F23.7	HLA-DRB5, FAM8A1, PSMB9, HLA-DQB2, HLA-DQA2, CYP21A1P, HLA-DQB1-AS1, SLC44A4, HLA-DOB, TNXB, NOTCH4, HLA-DQA1, TAP2, HLA-DQB1, HLA-DRA, HLA-DRB6, DDAH2, HLA-DRB1
5	q14.3	rs77156384	87209219:88209219	CED	0.208571	-0.0156568	0.0124507	8.74853e-08	-0.0616566	0.0115221	0.00669581		0.0352379	-0.14098	0.0669517	0.413517	-0.0503724	0.0616004	0.143229		-0.019846	0.0122408	0.104955	-0.0612752	0.0113257	6.2925e-08	CTC-498M16.2
18	q11.2	rs1668091	21790711:22790711	AED	0.210629	-0.00467541	0.00373483	8.6783e-07	-0.0170818	0.00347217	0.00578406		0.000968654	-0.0252329	0.00764684	0.749505	-0.00223917	0.00701289	0.0107244		-0.00863486	0.00335594	0.0100819	-0.0141597	0.00311166	5.35158e-06	RP11-449D8.3, RP11-449D8.5
13	q12.2	rs12872889	28174628:29174628	AED	0.213807	0.00518658	0.00417206	5.44668e-08	0.0210567	0.00387336	0.00269269		0.809781	-0.00218107	0.00906099	0.00363376	0.0242975	0.00835399	0.0117071		0.00389782	0.00378964	0.303694	0.0216301	0.00351402	7.48987e-10	FLT3	PAN3, FLT3, PAN3-AS1
5	q31.1	rs247008	130947104:131947104	SSE	0.215429	0.00459195	0.00370684	5.54822e-09	0.0201482	0.0034559	0.00165964		0.000550594	0.0266747	0.00772016	0.200675	0.00909381	0.00710648	0.0288367		0.00872919	0.00334161	0.00899419	0.0180339	0.00310789	6.52825e-09	snoZ6, AC063976.1	SLC22A5, MIR3936HG, CDC42SE2, ACSL6, SLC22A4, IRF1, RAD50, HINT1, MEIKIN, LYRM7, RAPGEF6, P4HA2
4	q26	rs1397610	119627761:120627761	AED	0.217768	0.00608466	0.00493689	0.000673606	0.0156498	0.00460267	0.00176777		0.000821356	-0.0286139	0.00855217	0.440847	0.00609706	0.00791035	0.00118793		-0.00258812	0.00427563	0.544967	0.0132337	0.00397825	0.000879418	RP11-455G16.1	AC110373.1, AC093752.1, C4orf3, AC092656.1, USP53
12	q15	rs1585705	69292102:70292102	CED	0.224408	-0.00456758	0.00375965	0.000314521	-0.0126339	0.00350639	0.0929918		0.00135416	0.0248043	0.00774041	0.951672	-0.000433794	0.00715741	0.0034649		0.00103913	0.00338183	0.75864	-0.0102726	0.00314883	0.00110492	YEATS4, RN7SL804P	YEATS4, AC020656.1, CPSF6, RAB3IP, LYZ, ZNF131
6	p21.32	rs9268644	31908044:32908044	AED	0.229285	-0.00417053	0.00346906	2.14743e-08	-0.0180976	0.00323176	0.000583888		0.148611	0.0112273	0.0077725	0.00019086	0.0266794	0.00715045	0.000924993		-0.00161272	0.00316785	0.610689	-0.0105024	0.00294494	0.000362142	HLA-DRA	FAM8A1, HLA-DQA1, ARHGAP24, DEF8, HLA-H, HLA-G, HLA-DRB5, TRIM56, HLA-DQB1-AS1, SQSTM1, HLA-C, HCP5, TNXA, TINF2, RPL34, CYP21A1P, SLC44A4, TNXB, LIMS1, TOMM22, HLA-DQB1, HLA-DRA, DDAH2, HLA-DRB1, AOAH, HLA-DQB2, CSNK2A1, TOM1, HLA-DQA2, TSBP1, PRKRA, NOTCH4, ZNF20, SKIV2L, SSRP1, HLA-DRB6, DHX30
2	p15	rs901529	62317468:63317468	CED	0.250118	0.00430528	0.0037435	1.51806e-08	0.0197718	0.0034934	0.00252259		0.970662	-0.00051291	0.013946	0.011742	0.0323868	0.0128523	0.034697		0.00398145	0.00361551	0.270804	0.0206397	0.00337109	9.20837e-10	AC092155.4	OTX1, WDPCP
2	p16.1	rs6757907	54782926:55782926	SSE	0.253839	-0.00421523	0.00369407	4.31359e-10	-0.0214634	0.00343823	0.000477423		0.000224329	-0.0307919	0.00834393	0.914507	-0.000824746	0.0076823	1.35006e-05		-0.00857071	0.00337784	0.0111699	-0.0180193	0.00313826	9.36757e-09	RTN4	CLHC1, RTN4
16	p13.3	rs8052518	7175119:8175119	AED	0.272405	0.00508019	0.00462869	2.50266e-06	0.0203237	0.0043168	0.00472355		0.0801528	0.0157384	0.00899411	0.00362088	0.0238492	0.00819674	0.088508		0.00731194	0.00411565	0.0756312	0.0210892	0.00381949	3.36175e-08	RBFOX1
8	q12.3	rs791405	64220735:65220735	SSE	0.273422	-0.00380418	0.00347344	4.21398e-10	-0.0201691	0.00322901	0.000191588		0.830644	0.00210701	0.0098515	0.000506879	0.0315829	0.00908241	0.00767758		-0.00315059	0.00327579	0.33616	-0.0143618	0.00304245	2.3529e-06	RP11-32K4.1
11	p15.4	rs11041939	7991223:8991223	SSE	0.287166	-0.0089122	0.00837328	4.40949e-08	-0.0427472	0.00780937	0.000748384		0.00120183	0.0262608	0.00810836	0.796083	0.00193789	0.00749896	0.00436063		0.00923951	0.00582488	0.112691	-0.0194989	0.00540897	0.000312245	STK33	LMO1, TRIM66, STK33
4	q27	rs66824650	120980871:121980871	SSE	0.340402	0.00627129	0.00657799	4.41791e-08	-0.0333762	0.00609778	9.85957e-06		0.307131	0.04666	0.045688	0.0126595	-0.0977063	0.0391873	0.00823247		0.00709151	0.00651085	0.276073	-0.034897	0.00602527	6.96461e-09	RP11-679C8.2, RP11-501E14.1
15	q12	rs12101625	26472431:27472431	CED	0.340869	-0.00341178	0.0035821	4.04103e-07	-0.0168583	0.00332695	0.00595056		0.00533005	0.0222621	0.00798908	0.877375	-0.00112741	0.00730667	0.00729349		0.000885721	0.00326858	0.786406	-0.0141569	0.00302785	2.93125e-06	GABRB3	GABRB3
1	q25.2	rs6425446	177264577:178264577	CED	0.364937	-0.00315764	0.00348526	3.91587e-07	-0.0164341	0.00323942	0.00457817		0.113017	-0.0135428	0.00854536	0.000409851	-0.0278052	0.00786805	0.0144083		-0.00463878	0.00322717	0.1506	-0.0180823	0.00299547	1.57459e-09	RP11-63B19.1, SEC16B
9	q33.2	rs71497048	124108352:125108352	CED	0.368189	-0.00316604	0.00351831	1.70607e-06	-0.015671	0.00327461	0.00287922		0.474172	0.0065567	0.00916103	0.0237107	0.0189859	0.00839391	0.0227374		-0.00191631	0.00328442	0.559588	-0.0110932	0.00305068	0.000276579	TTLL11	TTLL11
1	p31.1	rs4650620	78194705:79194705	SSE	0.452143	-0.00273386	0.00363618	3.34127e-09	0.0200012	0.00338192	3.67178e-06		0.0967542	-0.0146372	0.00881311	0.000260453	-0.029676	0.0081258	0.032336		-0.00446539	0.00336132	0.184025	0.0126667	0.00312229	4.97401e-05	RNFT1P2, RP11-183M13.1	PTGFR, DNAJB4, NEXN
1	q22	rs4276913	154631673:155631673	AED	0.471099	0.00257557	0.00357374	3.14625e-07	-0.0170461	0.00333281	3.01537e-05		0.359161	-0.00716923	0.00781833	1.83289e-05	0.030874	0.00720542	0.000173048		0.000891397	0.00325028	0.783891	-0.00860068	0.0030249	0.00446498	HMGN2P18, KRTCAP2	MUC1, MTX1, MSX1, ADAM15, GBA, EFNA1, KRTCAP2, GBAP1, SLC50A1, MTX1P1, EFNA3, THBS3, DPM3
12	p11.22	rs11049416	27843238:28843238	SSE	0.475469	-0.00271521	0.00380489	7.94287e-09	-0.0204491	0.00354408	0.000384192		0.228209	0.0105608	0.0087641	0.0281379	0.0176678	0.00804751	0.0864822		-0.000609762	0.00349016	0.861309	-0.0142573	0.00324348	1.10424e-05	RP11-967K21.1	CCDC91
8	q21.11	rs117212676	76132003:77132003	CED	0.563247	0.00727185	0.0125805	2.37097e-08	0.0651892	0.0116769	0.000740149		0.336088	0.0391095	0.040657	0.00115466	0.120073	0.0369447	0.0191634		0.0100538	0.0120183	0.402848	0.0701739	0.011134	2.92569e-10	HNF4G, AC016194.1
15	q26.3	rs72633241	100318872:101318872	SSE	0.588917	-0.00326713	0.00604568	4.63751e-08	0.0306627	0.00561085	3.78599e-05		0.644263	-0.00838771	0.018165	0.00975208	-0.0437453	0.0169253	0.0146411		-0.00377777	0.00573632	0.510172	0.0232952	0.00532583	1.21991e-05	ADAMTS17	LINS1
11	q23.2	rs1245138	112508370:113508370	AED	0.59177	0.00195095	0.00363798	2.9511e-05	0.0140961	0.00337443	0.00311277		0.0080832	-0.0238627	0.00900909	0.18443	0.0111087	0.00836965	0.00222818		-0.00166818	0.00337333	0.620938	0.0136784	0.00312964	1.23909e-05	NCAM1
8	p21.3	rs11786089	21475521:22475521	SSE	0.601233	0.00182171	0.00348567	3.55602e-12	0.0225446	0.00324185	6.13173e-06	CED	0.0122596	0.0192037	0.00766697	0.000135042	0.0269617	0.00706277	0.0151561		0.00479905	0.00317313	0.130432	0.0233133	0.0029463	2.51815e-15	HR	FAM160B2, NUDT18
2	p23.3	rs7596387	25023196:26023196	AED	0.620523	-0.00284274	0.00574163	2.18316e-06	-0.0252343	0.00532838	0.00182015		0.0263563	-0.0172404	0.00776237	0.0105507	-0.0182299	0.00712842	0.0496044		-0.00793429	0.00461608	0.0856441	-0.0227236	0.00426785	1.01313e-07	DNMT3A
2	p23.3	rs116789887	24691843:25691843	CED	0.654012	-0.00211889	0.00472758	3.2781e-06	-0.0204929	0.00440451	0.00445991		0.0252342	-0.0773464	0.034562	0.993162	0.000274179	0.031991	0.00785147		-0.00350057	0.00468396	0.454852	-0.0201066	0.00436335	4.06446e-06	AC013267.1	ADCY3, EFR3B, DNAJC27, POMC
15	q24.1	rs35364449	73778126:74778126	AED	0.677318	-0.00192169	0.00461805	0.00140918	0.0136793	0.00428439	0.0119427		0.666679	-0.0035143	0.00815924	0.0569459	-0.0144744	0.00760297	0.0809528		-0.00230809	0.00401897	0.565765	0.00689383	0.00373255	0.0647545	STOML1	PML, LOXL1-AS1, SCAMP2, STOML1, STRA6, LOXL1
9	p22.3	rs7040652	14066406:15066406	SSE	0.686084	-0.00163361	0.00404183	3.58941e-06	-0.017448	0.00376524	8.11386e-05		0.00775251	-0.0510292	0.0191635	0.669037	0.00745448	0.0174385	0.00561796		-0.00373735	0.00395482	0.344653	-0.0163388	0.00368043	9.02234e-06	RP11-408A13.2, RP11-408A13.3	ZDHHC21
11	q23.1	rs80331414	110141812:111141812	SSE	0.699362	0.0017621	0.00456287	3.43735e-08	0.0234907	0.00425728	0.000443777		0.0083327	0.0204824	0.00776304	0.643942	-0.00329729	0.00713392	0.012052		0.00656884	0.0039337	0.094941	0.016456	0.00365579	6.75255e-06	ARHGAP20, HNRNPA1P60	FDX1
16	q23.1	rs13330107	76378862:77378862	AED	0.735789	0.00121033	0.00358684	5.32016e-08	0.0181618	0.00333828	0.000541145		0.0339154	-0.0182824	0.00861905	0.195931	-0.0102432	0.00792049	0.0357086		-0.00166715	0.00331153	0.614657	0.0138771	0.00307621	6.44959e-06	CTD-2336H13.2
16	p11.2	rs143504748	29461344:30461344	SSE	0.764755	0.00217695	0.00727486	1.48484e-09	0.040904	0.00676513	9.68656e-05	SSE_Female	0.828707	-0.00493061	0.0227888	7.57533e-05	0.0826589	0.0208848	0.00018146	SSE	0.00151962	0.0069303	0.826438	0.0448692	0.0064359	3.13116e-12	TMEM219	MVP, YPEL3, INO80E, MAPK3
11	q23.3	rs8181524	115124979:116124979	OED	0.779	-0.00178458	0.00635936	2.10438e-07	0.0309682	0.00596682	0.000172717		0.86373	0.00240725	0.0140259	0.0171076	0.0307025	0.012876	0.0376716		-0.00106979	0.00579184	0.853459	0.0309212	0.00541378	1.1193e-08	LINC00900
14	q32.33	rs3212076	103670796:104670796	AED	0.801947	-0.000928997	0.00370371	1.67307e-06	0.0164858	0.00344205	0.000413639		0.00331119	-0.0278285	0.00947357	0.128227	-0.0131491	0.0086441	0.0410289		-0.00449532	0.00344947	0.192509	0.01243	0.00319785	0.000101499	XRCC3	EIF5, AL049840.1, ZFYVE21, TRMT61A, KIF26A, APOPT1, PPP1R13B, TDRD9, XRCC3, CKB, AL049840.4, AL139300.1, KLC1, BAG5
4	q34.1	rs1491333	171686288:172686288	AED	0.827145	0.000875875	0.00401106	1.47177e-06	-0.0179323	0.00372411	0.000589682		0.0163731	-0.0285948	0.0119114	0.419087	-0.00882726	0.0109246	0.0580709		-0.00212559	0.00380132	0.576044	-0.0169844	0.00352493	1.44739e-06	RP11-384D10.1, RP11-717H13.1
12	q14.1	rs1031582	61763645:62763645	CED	0.838733	-0.000862148	0.00423629	1.68562e-07	0.0204975	0.00391829	0.00021433		0.0125466	0.0191006	0.00765089	0.990401	8.44339e-05	0.00701796	0.0130164		0.003822	0.0037061	0.302413	0.0156464	0.00342117	4.79847e-06	FAM19A2	FAM19A2
11	p15.1	rs7109186	21144254:22144254	AED	0.87682	0.000557818	0.00359878	5.08553e-06	-0.0152535	0.00334407	2.53545e-05		0.337206	-0.0076787	0.00800102	0.0454072	0.0147248	0.007359	0.0183729		-0.000828129	0.00328206	0.800794	-0.0101226	0.00304447	0.000884479	NELL1, CTD-2019O4.1
4	q27	rs769246	122241343:123241343	SSE	0.907277	0.000430133	0.00369297	4.42075e-08	0.0188622	0.00344617	0.000119753		0.0109511	0.0205454	0.00807475	0.0437533	0.0149522	0.0074149	0.0435836		0.00390976	0.0033584	0.244354	0.0181676	0.00312514	6.12194e-09	CCNA2	BBS7, CCNA2, EXOSC9, ANXA5
15	q24.3	rs2682928	77387308:78387308	AED	0.971114	-0.000129745	0.00358295	3.33069e-06	-0.015486	0.00333072	0.00169477		0.00151845	0.0275355	0.00868244	0.402917	-0.00669087	0.0079993	0.000547032		0.00389592	0.00331202	0.239477	-0.0141865	0.00307483	3.95466e-06	RP11-307C19.2	HMG20A, AC046168.1, TSPAN3, LINGO1, PEAK1
16	q21	rs1423771	64808280:65808280	AED	0.972376	-0.000124658	0.00359981	9.33301e-06	0.0148257	0.00334501	0.00234715		0.0978862	0.014304	0.00864168	0.741886	-0.00259509	0.00787924	0.0518293		0.00200886	0.00332302	0.545493	0.0121654	0.00307903	7.78079e-05	RP11-256I9.3
8	p11.23	rs12681990	36359186:37359186	AED	0.978256	0.000139194	0.00510702	1.3051e-06	-0.0229889	0.00475062	0.000889065		0.0165394	0.0244958	0.0102197	0.79669	0.00242934	0.00942939	0.0468962		0.0050062	0.00456836	0.273148	-0.0178432	0.0042426	2.6024e-05	AC090453.1, RP11-419C23.1	ZNF703

## Sheet: 23119_irnt
CHR	Band	locus	Range	Type	p_male	beta_male	se_male	p_female	beta_female	se_female	Min P_diff	Type (Rep)	p_male (Rep)	beta_male (Rep)	se_male (Rep)	p_female (Rep)	beta_female (Rep)	se_female (Rep)	Min p_diff (Rep)	Type (Final)	beta_male (Meta)	se_male (Meta)	p_male (Meta)	beta_female (Meta)	se_female (Meta)	p_female (Meta)	Genes	QTL Genes
16	q12.2	rs62048402	53303223:54303223	CED	5.18233e-75	0.0643742	0.00351102	3.90664e-71	0.0585161	0.00327994	0.0454188	CED	8.42308e-26	0.0546246	0.00519677	1.05142e-11	0.0388998	0.00571954	4.41306e-25		0.0613187	0.00290927	1.29417e-98	0.0536616	0.00284529	2.44188e-79	FTO
16	p11.2	rs27741	28004181:29004181	CED	2.33484e-27	0.0379058	0.00349764	2.85488e-17	0.0276565	0.00327174	0.00170153	AED	3.59554e-11	0.0350128	0.00528723	0.000253051	0.021105	0.00576724	0.00743064		0.0370252	0.00291712	6.51675e-37	0.0260614	0.00284572	5.28111e-20	CLN3	EIF3C, SH2B1, APOBR, NUPR1, SPNS1, AC145285.2, ATP2A1, NPIPB7, CLN3, P8, TUFM, AC138894.3, ATXN2L, XPO6, NPIPB15, RRN3P2, NPIPB8, SGF29, AC145285.5, SULT1A2, EIF3CL, IL27, SBK1, CDC37P1, NPIPB6, ATP2A1-AS1, SULT1A1
11	p11.2	rs12798028	47104639:48104639	CED	2.3463e-27	0.0378887	0.0034962	8.15255e-20	0.0298151	0.00327202	0.00547714	AED	0.00499828	-0.0163376	0.0058196	5.82137e-06	-0.0287819	0.0063489	0.00873913		0.0235078	0.00299696	4.36761e-15	0.0175177	0.00290849	1.71245e-09	NDUFS3	RAPSN, NUP160, MYBPC3, ACP2, NR1H3, PSMC3, FAM180B, MADD, MTCH2, FNBP4, C1QTNF4, DDB2, SPI1, AC090559.1, PTPMT1, CELF1
2	p23.3	rs4430895	24661386:25661386	CED	8.76264e-25	0.0354607	0.00344925	3.39671e-32	0.0380666	0.0032222	0.00139417	AED	0.0280272	0.011404	0.00519073	3.926e-05	0.023367	0.00568232	0.0208235		0.0280919	0.00287282	1.39214e-22	0.03449	0.00280292	8.51037e-35	ADCY3, DNAJC27	ADCY3, DNAJC27-AS1, CENPO, DNAJC27, POMC
2	q36.3	rs2943650	226605921:227605921	SSE	5.24858e-23	-0.0356073	0.0036046	0.00125462	-0.0108469	0.00336213	4.75283e-07	SSE_Male	7.20897e-08	0.0392128	0.00727901	0.443098	0.00611009	0.00796643	0.00040122	SSE	-0.0208727	0.00323022	1.03547e-10	-0.00828323	0.00309757	0.00749282	AC068138.1, MIR5702	IRS1
6	p12.3	rs3798519	50288778:51288778	CED	3.7215e-20	0.0413904	0.00450042	1.68361e-10	0.02685	0.00420314	0.00344008	AED	0.116468	0.0107838	0.00686945	0.000114079	0.0287915	0.0074611	0.0038566		0.032199	0.00376449	1.19578e-17	0.0273177	0.00366204	8.67187e-14	TFAP2B	TFAP2B
18	q21.32	rs139806266	57587882:58587882	CED	1.98335e-18	-0.107042	0.0122204	1.81987e-20	-0.106059	0.0114369	0.106049	CED	0.367478	-0.0120713	0.0133944	2.3088e-06	-0.0705294	0.0149269	0.0016587		-0.0639003	0.0090277	1.45986e-12	-0.0929166	0.00907847	1.38443e-24	MC4R, RP11-325K19.3
4	q24	rs13107325	102688709:103688709	CED	2.76847e-18	0.0568751	0.00652119	1.6852e-13	0.045413	0.00616004	0.0206463	AED	0.0153979	0.0248152	0.0102415	4.17361e-06	0.0515962	0.0112088	0.0255507		0.0476265	0.00550073	4.7925e-18	0.0468473	0.0053985	4.03371e-18	SLC39A8	SLC39A8
2	p25.3	rs62106258	0:917167	CED	3.09392e-18	-0.0702929	0.00807132	3.64334e-30	-0.0853515	0.00747783	0.00533798	AED	5.24123e-05	-0.0495555	0.0122506	7.23862e-12	-0.0899681	0.0131248	0.00625932		-0.0640159	0.00673996	2.14035e-21	-0.0864829	0.00649727	2.00756e-40	AC105393.1, AC105393.2	SH3YL1
12	q13.12	rs7132908	49763148:50763148	CED	3.89341e-18	0.0307398	0.00354027	9.38224e-13	0.0236836	0.00331715	0.0364061	CED	5.03595e-07	0.027233	0.00541848	9.64639e-06	0.0260955	0.00589661	0.028069		0.0296906	0.00296375	1.27113e-23	0.0242634	0.00289108	4.75931e-17	FAIM2	ARF3
4	p12	rs10938398	44686139:45686139	CED	2.27459e-17	0.029512	0.00348028	8.55956e-18	0.027978	0.00325603	0.166165	CED	0.00657223	0.0142472	0.0052419	4.69711e-05	0.0231442	0.00568564	0.0176227		0.0248418	0.00289942	1.0543e-17	0.0267842	0.00282551	2.55643e-21	RP11-362I1.1, PRKRIRP9
18	q21.32	rs2168711	57348531:58348531	CED	4.7103e-17	0.0341982	0.00407382	1.39767e-31	0.0443968	0.00379646	0.00852148	CED	0.000390608	0.0216956	0.0061171	3.83032e-08	0.0363671	0.00661275	0.00140011		0.0303568	0.00339071	3.46158e-19	0.0424063	0.00329244	5.8412e-38	RNU4-17P, RP11-795H16.2
19	p13.11	rs11668601	17714521:18714521	SSE	3.06461e-16	0.0287285	0.00351566	7.6735e-06	0.0146823	0.00328154	0.000371683		0.131748	0.00867301	0.00575407	0.00174572	0.0196442	0.00627491	0.0502219		0.0232768	0.00300001	8.56667e-15	0.0157479	0.0029079	6.11008e-08	MAST3	PDE4C, MPV17L2, MAST3, IQCN, RAB3A, IL12RB1, IFI30
1	q21.2	rs11205303	149406413:150406413	SSE	3.21248e-16	0.0294253	0.00360343	0.00013137	0.012847	0.00335961	0.000427315	AED	0.000464931	-0.0234568	0.0067009	0.276336	-0.00793225	0.00728665	0.0584128		0.0175632	0.00317365	3.12897e-08	0.00920415	0.00305094	0.00255438	MTMR11	SV2A
2	p25.3	rs6751993	135864:1135864	CED	8.02895e-16	0.0367126	0.00455798	4.79587e-27	0.0458874	0.00426022	0.00142621		9.26931e-11	-0.0418043	0.00645065	0.000824092	-0.0235343	0.00703603	0.000702102		0.0105657	0.00372248	0.00453476	0.027264	0.00364426	7.35532e-14	AC093326.3, TMEM18	CHD3, SH3YL1
1	q25.2	rs543874	177389480:178389480	CED	4.82163e-15	0.0332647	0.00424716	2.13067e-36	0.0500511	0.0039717	0.000288563	CED	0.00706008	0.0172875	0.00641665	1.43021e-14	0.0538252	0.00699356	5.91479e-05		0.0283974	0.00354163	1.07331e-15	0.0509715	0.00345363	2.69928e-49	RP11-63B19.1, SEC16B
15	q23	rs58648944	67465102:68465102	CED	6.59527e-15	0.0274566	0.00352336	6.29332e-08	0.0178214	0.00329387	0.003922		0.0233771	-0.0141373	0.00623523	1.05994e-08	-0.0386041	0.0067466	0.00306591		0.0173898	0.0030675	1.43596e-08	0.0069604	0.00295993	0.0186959	MAP2K5
1	q41	rs10495121	219137686:220137686	CED	8.65997e-15	-0.0271762	0.00350288	3.04697e-08	-0.0181378	0.0032746	0.0201797	CED	2.05128e-05	0.0233264	0.00547585	0.450854	0.00452143	0.0059966	0.0066304		-0.0125111	0.00295078	2.23594e-05	-0.0129329	0.00287401	6.79644e-06	RP11-95P13.1, RP11-95P13.2	LYPLAL1, LYPLAL1-AS1
5	q14.3	rs34483452	87486314:88486314	CED	2.33614e-14	0.0387364	0.00507598	1.20166e-08	0.0270859	0.00475212	0.00828265	CED	0.000493009	0.0247749	0.00710925	0.000136228	0.0295495	0.00774506	0.0227809		0.0340222	0.00413106	1.78497e-16	0.0277597	0.00405046	7.20837e-12	CTC-467M3.1	MEF2C
12	q24.31	rs7133378	123909502:124909502	CED	3.78452e-14	0.0280568	0.00370687	3.09477e-14	0.0263059	0.00346364	0.140907	SSE_Female	0.00996506	0.0141815	0.0055027	4.16644e-05	0.0246607	0.00601703	0.000568263		0.0237257	0.00307436	1.18855e-14	0.0258964	0.00300182	6.30346e-18	CCDC92	ZNF664, RP11-380L11.4, CCDC92, DNAH10OS, DNAH10
1	p31.3	rs12140153	62079891:63079891	CED	5.61092e-14	-0.0449356	0.00597746	3.26816e-07	-0.0286941	0.00561807	0.034916	AED	0.00233119	-0.0161294	0.00529758	7.17408e-05	-0.022926	0.00577359	0.0762097		-0.0288018	0.00396463	3.73921e-13	-0.0258888	0.00402643	1.27852e-10	INADL	L1TD1
11	p14.1	rs11030119	27228102:28228102	CED	1.6534e-13	0.0275699	0.00373839	4.27204e-19	0.0311381	0.00348667	0.117313	CED	0.111174	0.00939048	0.00589491	0.00128868	0.0206236	0.00640742	0.0318676		0.0223556	0.00315707	1.42967e-12	0.0287359	0.0030626	6.41999e-21	RP11-587D21.4	BDNF, LIN7C
1	p31.1	rs2815748	72316147:73316147	CED	1.7615e-13	0.0318274	0.00432063	1.00214e-06	0.0197181	0.0040312	0.00261357	AED	0.00111633	-0.0172604	0.00529506	0.0209331	-0.0133111	0.00576421	0.0129486		0.0122074	0.0033476	0.000265733	0.00886969	0.0033035	0.00725428	RPL31P12, RNU6-1246P	RPL31P12, NEGR1
4	q22.1	rs6814344	89233882:90233882	SSE	2.52577e-13	-0.0253412	0.0034628	0.0155203	-0.00782125	0.00323189	0.000216633		0.0321571	-0.0111511	0.00520462	0.273203	-0.00619917	0.00565756	0.111193		-0.0209871	0.002883	3.34772e-13	-0.00742216	0.00280628	0.00817302	FAM13A	FAM13A
8	q23.3	rs2737263	116167539:117167539	CED	2.9675e-13	-0.0279155	0.00382589	1.43829e-10	-0.0228685	0.00356644	0.0156204	CED	1.29438e-05	-0.024638	0.00564868	0.128729	-0.00929095	0.00611583	0.0110516		-0.0268848	0.00316769	2.11695e-17	-0.019423	0.00308086	2.89322e-10	TRPS1	TRPS1
2	p13.3	rs4410328	69100683:70100683	SSE	3.49645e-13	-0.0255655	0.00351447	0.0449945	-0.00656774	0.00327614	7.68419e-05	CED	6.41475e-08	-0.0291441	0.00538893	0.0891999	-0.00997407	0.00586822	0.00806163		-0.0266334	0.00294377	1.46458e-19	-0.00737715	0.00286054	0.0099105	GFPT1	NFU1, GFPT1, SNRNP27
6	p12.3	rs2817419	50312906:51312906	CED	7.29704e-13	0.0287261	0.00400402	4.69196e-12	0.0259474	0.00375231	0.00364687	CED	7.02758e-05	-0.0294066	0.0073963	0.0584765	-0.015421	0.00814992	0.0223368		0.0155507	0.00352116	1.00379e-05	0.018712	0.00340841	4.02058e-08	TFAP2B	TFAP2B
22	q13.1	rs2267372	38098234:39098234	CED	9.69839e-13	-0.0250184	0.00350629	8.87845e-06	-0.0146368	0.00329438	0.0172277	CED	0.000110183	0.020266	0.00524013	0.606099	0.00294887	0.00571871	0.00194745		-0.0110137	0.0029141	0.000157177	-0.010255	0.0028546	0.000327583	MAFF	NOL12, BAIAP2L2, CPAMD8, MAFF, PLA2G6, ANKRD54, TMEM184B, CSNK1E, TDRKH
9	p22.3	rs10756713	15380555:16380555	CED	1.07526e-12	-0.0247594	0.00347692	6.42723e-15	-0.0252672	0.00324109	0.076606		0.142962	-0.00775179	0.00529174	0.00187621	-0.01796	0.00577612	0.00765411		-0.019631	0.00290581	1.42067e-11	-0.0235174	0.00282652	8.77628e-17	CCDC171	CCDC171
3	p25.2	rs7649970	11892272:12892272	CED	1.20272e-12	0.037192	0.00523417	8.65777e-09	0.0282931	0.00491593	0.0220617	CED	8.45054e-05	0.0314754	0.00800546	0.00163797	0.0274663	0.0087215	0.00608209		0.0354801	0.00438088	5.54874e-16	0.0280938	0.00428249	5.37537e-11	PPARG	SYN2
5	q35.1	rs10038105	169854039:170854039	CED	7.06227e-12	0.0265421	0.00387087	1.68578e-07	0.0189526	0.00362298	0.0967959		0.0229106	-0.0126443	0.00555784	0.67676	-0.00251482	0.0060323	0.0786487		0.0137426	0.0031764	1.51519e-05	0.0132617	0.00310586	1.95556e-05	RANBP17	RANBP17, ZNF836, AC008514.2
9	p22.2	rs10810611	16256377:17256377	CED	7.2861e-12	-0.0249528	0.00364145	4.1275e-08	-0.0186047	0.00339159	0.0139301		0.538128	0.00386104	0.00627146	0.000914676	0.022646	0.00682976	0.00700313		-0.0176878	0.0031491	1.94538e-08	-0.0104445	0.00303766	0.000585286	BNC2
[truncated: 617 more rows]

## Sheet: 23111_irnt
CHR	Band	locus	Range	Type	p_male	beta_male	se_male	p_female	beta_female	se_female	Min P_diff	Type (Rep)	p_male (Rep)	beta_male (Rep)	se_male (Rep)	p_female (Rep)	beta_female (Rep)	se_female (Rep)	Min p_diff (Rep)	Type (Final)	beta_male (Meta)	se_male (Meta)	p_male (Meta)	beta_female (Meta)	se_female (Meta)	p_female (Meta)	Genes	QTL Genes
[truncated: 649 more rows]

[truncated: 6 more sheets: 23100_irnt, 23115_irnt, 23124_irnt, 23112_irnt, 23120_irnt, 23116_irnt]
