# Supplementary material for: Identifying sex-specific genetic effects across 733 traits in UK Biobank
Source: Research Square preprint supplement (doi:10.21203/rs.3.rs-701876/v1), 2021-07-20
Supplement: Supplementary file 4 [file B. BP.xlsx]

## Sheet: 4079_irnt
CHR	Band	locus	Range	Type	p_male	beta_male	se_male	p_female	beta_female	se_female	Min P_diff	Type (Rep)	p_male (Rep)	beta_male (Rep)	se_male (Rep)	p_female (Rep)	beta_female (Rep)	se_female (Rep)	Min p_diff (Rep)	Type (Final)	beta_male (Meta)	se_male (Meta)	p_male (Meta)	beta_female (Meta)	se_female (Meta)	p_female (Meta)	Genes	QTL Genes
12	q24.12	rs3184504	111384608:112384608	CED	3.85854e-20	-0.0326644	0.00355311	5.47986e-36	-0.0411573	0.00328542	0.00102941	CED	1.19923e-06	0.0438608	0.00903029	6.41949e-11	0.0515007	0.00787969	0.025663		-0.0224054	0.00330638	1.23195e-11	-0.0274347	0.00303239	1.46652e-19	SH2B3	CLUAP1, PRKCA, ICAM1, KLF6, COCH, TSPAN2, RAB11FIP5, TUBB6, GBP5, PTPN4, RNF165, VIM, DUSP18, SPIB, TNFRSF13C, GLB1L2, WARS, LGALS3BP, IDO1, TRIM22, GBP6, MAL, TRAK1, TP53INP2, APOL3, DHRS3, FCGR1CP, UBE2L6, MYADM, PLPP5, RRP12, VPREB3, AHNAK, ANKRD28, LIMK1, GGT5, PRSS23, SYNJ2, PNOC, ANKRD22, VAMP5, GNG7, PPP1R15A, POU2AF1, SFMBT1, SRBD1, EMP1, DPP4, POLD3, FAM241B, OXNAD1, FUZ, APOL2, EZR, FBX…
4	q21.21	rs13125101	80674592:81674592	CED	4.60694e-20	0.0357692	0.00389894	4.8288e-19	0.0322607	0.00361785	0.239159	SSE_Male	0.0230245	0.0219415	0.00965234	4.13432e-09	0.0492302	0.00837195	0.0118146		0.0338295	0.00361515	8.14825e-21	0.034931	0.00332102	7.12647e-26	PRDM8, FGF5	FGF5
1	p36.22	rs12567136	11383731:12383731	CED	9.33611e-19	-0.042431	0.00479777	9.66563e-21	-0.0415141	0.0044444	0.033452		0.0358282	-0.0203635	0.00970157	0.00070243	-0.0285497	0.00842434	0.0239448		-0.0380946	0.00430062	8.15066e-19	-0.0386914	0.0039309	7.35744e-23	CLCN6	NPPA, MTHFR, MFN2, CLCN6
12	p12.2	rs7972957	19664203:20664203	CED	1.10658e-17	0.034225	0.00399671	2.71347e-07	0.0190102	0.00369666	0.00178651	CED	0.0941332	-0.0166613	0.00995266	1.91714e-05	-0.0369487	0.00864304	0.0113607		0.0271586	0.00370884	2.43085e-13	0.0103566	0.00339883	0.00231054	RP11-405A12.2, RP11-664H17.1	LINC02398
11	q22.1	rs604723	100110546:101110546	CED	3.5357e-15	0.0311279	0.00395468	1.1548e-24	0.0375703	0.00366401	0.0170244	CED	0.00121271	-0.0325128	0.0100463	0.00237604	-0.0264715	0.00871076	0.0112285		0.0225894	0.00367984	8.31956e-10	0.0279428	0.00337739	1.30102e-16	ARHGAP42	ARHGAP42
15	q24.1	rs62006566	74586534:75586534	CED	7.32397e-14	-0.0289254	0.00386569	3.87009e-19	-0.0320511	0.00358449	0.0576904	CED	0.000565139	0.0351465	0.0101924	2.26745e-08	0.0489962	0.00876238	0.00652283		-0.0208679	0.00361446	7.76638e-09	-0.0204326	0.00331763	7.33013e-10	CSK	FAM219B, SCAMP2, CSK, ULK3, MPI, PPCDC, SEMA7A, CCDC33, RPP25, CYP1A2
2	q22.3	rs11674165	145225530:146225530	CED	1.0873e-13	0.0288436	0.00388178	3.63062e-06	0.0167341	0.003613	0.0018533		0.969573	-0.000365854	0.00959119	0.00321523	0.0242894	0.00824322	0.0256164		0.0247325	0.00359825	6.26596e-12	0.0179516	0.0033091	5.79802e-08	TEX41
20	p12.2	rs1887320	10465998:11465998	CED	2.50777e-13	0.0260494	0.00355908	2.36375e-10	0.0208783	0.0032952	0.0600396	SSE_Male	0.00150021	0.0298392	0.00939809	0.0595637	0.0152058	0.00807068	0.0196538		0.0265247	0.0033284	1.59686e-15	0.0200678	0.00305071	4.7662e-11	RP11-103J8.1
15	q23	rs117539635	69182916:70182916	CED	3.76228e-13	-0.082097	0.0113012	5.6218e-07	-0.0527333	0.0105383	0.057396	CED	0.017771	-0.0636874	0.0268664	0.000126886	-0.0897149	0.0234066	0.23256		-0.0793293	0.0104171	2.63098e-14	-0.0589662	0.00960928	8.44232e-10	PAQR5	PAQR5
19	p13.2	rs167479	11026765:12026765	CED	4.53686e-13	-0.02569	0.00354878	1.3325e-15	-0.0263466	0.00329651	0.141091	CED	0.00233742	-0.0275244	0.00904229	0.00088082	-0.0259413	0.00779866	0.239678		-0.0259348	0.00330347	4.13462e-15	-0.0262852	0.00303639	4.8551e-18	RGL3	ACP5
19	p13.2	rs12978472	6757990:7757990	CED	5.71643e-13	-0.038404	0.00532821	2.27741e-12	-0.0345414	0.00492264	0.00503365	CED	0.0266	-0.0298704	0.0134704	0.00481416	-0.0327438	0.0116137	0.0514833		-0.0372495	0.00495469	5.56081e-14	-0.0342676	0.00453231	4.00764e-14	INSR
12	q24.13	rs7953257	112184221:113184221	CED	6.23418e-13	-0.0264534	0.0036762	1.04562e-19	-0.0309033	0.00340152	0.116419	CED	0.000209044	0.0338174	0.0091191	1.7831e-08	0.0447029	0.00793554	0.0392526		-0.0180278	0.00340957	1.24067e-07	-0.019168	0.00312641	8.73377e-10	HECTD4	MAPKAPK5-AS1, TMEM116, PHETA1, ALDH2, SH2B3
10	q21.2	rs72831344	63018378:64018378	CED	7.23869e-13	-0.0354711	0.0049434	1.75726e-12	-0.0324185	0.00459642	0.0557235	CED	0.00827379	-0.0339179	0.0128432	0.00122236	-0.0359673	0.011122	0.0146505		-0.0352707	0.00461345	2.08655e-14	-0.0329362	0.00424795	8.94409e-15	C10orf107
1	p36.22	rs10864536	11324575:12324575	AED	2.03356e-12	0.0285278	0.00405644	4.31919e-06	0.0172987	0.00376424	0.0218447		0.214448	-0.0136819	0.0110208	0.00358179	-0.0279834	0.00960626	0.162826		0.0234917	0.00380676	6.78464e-10	0.0112712	0.00350477	0.00130007	C1orf167	MTHFR, MFN2, CLCN6, PLOD1, NPPB, KIAA2013
1	p36.23	rs1763839	7973336:8973336	SSE	7.22071e-12	0.0256868	0.00374785	0.00327188	0.0102255	0.00347686	0.000760308		0.913537	-0.00104398	0.00961493	0.00760447	-0.0223099	0.00835791	0.0139126		0.022161	0.00349194	2.20511e-10	0.00542576	0.00321017	0.090994	RERE	ENO1, CA6, PRXL2B, SLC45A1, RERE
6	p21.32	rs3131296	31672993:32672993	CED	1.03179e-11	-0.0334617	0.00491902	1.87853e-07	-0.0238269	0.00457226	0.0181088	CED	1.97481e-05	-0.0416023	0.00974609	8.07104e-08	-0.0451903	0.00842036	0.0347039		-0.0351144	0.00439139	1.28317e-15	-0.0286915	0.0040181	9.29462e-13	NOTCH4	ATF6B, CLIC1, TRBV5-1, HLA-DQA1, TRBV19, TRAV12-1, HLA-H, TRAV17, HLA-G, RNF5, TRBV2, DDX39B, GPSM3, HLA-DRB5, TUBB, HLA-S, TRAV21, BTN3A2, HLA-DOB, HLA-DQB1-AS1, TRAV8-1, MSH5, GPANK1, XRCC6, RNF5P1, HLA-C, HLA-DMA, HCP5, C4A, VWA7, TNXA, TRAV13-1, IER3, PRRT1, CYP21A1P, SLC44A4, TRAV35, TNXB, FLOT1, TRAV12-2, HLA-DQB1, BAG6, HLA-DPB2, HLA-DRB1, C4B, TRBV20-1, HLA-DQB2, TRAV26-1, PSMB9, TSBP1, P…
5	p13.3	rs12656497	32331939:33331939	CED	1.27366e-11	0.0244906	0.0036164	4.36216e-18	0.0290815	0.00335433	0.0527916	CED	0.0118302	-0.0227612	0.00904165	0.000542544	-0.0274098	0.00792381	0.0250824		0.0179739	0.00335778	8.65447e-08	0.0204966	0.00308896	3.23541e-11	NPR3, CTD-2218G20.1	NPR3
12	p12.2	rs17374842	19837687:20837687	CED	2.04643e-11	-0.0253701	0.00378479	3.90362e-08	-0.0193523	0.00352155	0.0229277		0.556944	0.00616095	0.0104886	0.000217471	0.0335193	0.0090636	0.00374419		-0.0217374	0.0035601	1.02256e-09	-0.0124176	0.00328249	0.000154962	CTC-465D4.1, RP11-284H19.1
12	q21.33	rs11105377	89588829:90588829	AED	3.39432e-11	-0.0312614	0.00471598	0.000156216	-0.0165713	0.00438273	0.011406	CED	0.000224841	-0.03348	0.00907337	0.0111339	-0.0200094	0.00788201	0.0146505		-0.0317333	0.00418451	3.36311e-14	-0.0173833	0.0038304	5.6728e-06	ATP2B1	GALNT4, POC1B
10	q23.33	rs7080472	95512950:96512950	CED	8.19243e-11	-0.0232656	0.00358072	4.66624e-14	-0.0250646	0.00332355	0.0524724		0.117037	-0.0156691	0.00999692	0.00313249	-0.0255032	0.00863153	0.0475258		-0.0224018	0.003371	3.02294e-11	-0.0251212	0.00310157	5.51777e-16	PLCE1	NOC3L, HELLS
7	q22.1	rs13245899	99997131:100997131	CED	1.11009e-10	0.0291672	0.00452094	0.00130681	0.0134544	0.00418551	0.00818324		0.347227	0.0131137	0.0139508	0.0013655	0.0386682	0.0120758	0.0370279		0.0276415	0.00430075	1.30026e-10	0.0161586	0.0039547	4.39034e-05	ACHE, RN7SL549P	MUC12, SLC12A9, PILRB, TRIP6, SRRT, ACHE, EPHB4, ZAN, GIGYF1, UFSP1
7	q36.1	rs3918226	150190176:151190176	CED	1.6918e-10	0.042018	0.00657825	6.50195e-11	0.0398948	0.0061075	0.0244802		0.939101	-0.000721693	0.00944623	0.00337392	-0.0239534	0.00817059	0.019369		0.0280601	0.00539825	2.01456e-07	0.0170077	0.00489187	0.000507584	NOS3	NOS3, GIMAP5
6	p21.32	rs1617322	32173893:33173893	CED	2.84372e-10	-0.0317214	0.00502917	5.00395e-09	-0.0273082	0.00467021	0.0308976	CED	0.00164807	-0.0421489	0.0133907	6.85529e-05	-0.0460696	0.0115701	0.0253393		-0.0330104	0.00470807	2.3586e-12	-0.0299367	0.00433072	4.75694e-12	HLA-DQB1, MTCO3P1	ATF6B, HLA-DQA1, HLA-H, HLA-G, RNF5, HLA-DRB5, TUBB, BTN3A2, HLA-DQB1-AS1, HLA-C, HLA-DMA, C4A, TNXA, IER3, CYP21A1P, HLA-DRB6, TNXB, HLA-DQB1, HLA-DRA, HLA-DPB2, C4B, HLA-DRB1, HLA-DQB2, PSMB9, CYP21A2, PBX2, NOTCH4, VARS2, SKIV2L, HLA-DPB1, TAP2, FLOT1
6	p21.33	rs3099840	30930721:31930721	SSE	2.95034e-10	-0.0280232	0.00444688	0.000371222	-0.0147534	0.00414443	0.00195074		0.397241	0.00788772	0.00931722	0.000190554	0.0302146	0.00809683	0.0123405		-0.0213607	0.00401322	1.0231e-07	-0.00541776	0.00368923	0.141959	XXbac-BPG181B23.6	ATF6B, LINC00243, HLA-DQA1, HLA-H, HLA-G, RNF5, CCHCR1, HLA-S, TUBB, BTN3A2, GPANK1, POU5F1, HLA-C, HCP5, HCG22, C4A, TNXA, IER3, CYP21A1P, PSORS1C3, MICB, HLA-DQB1, BAG6, C4B, HLA-DRB1, PSMB9, HLA-DQA2, CYP21A2, VARS2, SKIV2L, HLA-DPB1, APOM, FLOT1, AGER, B2M
4	q24	rs13107325	102688709:103688709	CED	3.76432e-10	-0.0420501	0.00671309	5.0621e-13	-0.0454634	0.00629326	0.0676899	CED	0.00108379	-0.057105	0.0174728	0.0115114	-0.038552	0.0152565	0.0204569		-0.0439865	0.0062665	2.22959e-12	-0.0444584	0.00581774	2.14089e-14	SLC39A8	SLC39A8
5	p13.3	rs3860752	32614977:33614977	SSE	3.85718e-10	0.0231026	0.00369046	0.12901	0.0051967	0.00342333	0.000374877		0.0402496	-0.0190284	0.00927631	0.736811	0.00270433	0.00804663	0.0383829		0.0173455	0.00342906	4.22793e-07	0.00481473	0.0031501	0.126404	CTD-2066L21.3
3	p22.1	rs7632387	41353161:42353161	CED	4.62303e-10	0.0302878	0.00486021	2.76575e-15	0.0356164	0.00450741	0.0620765		0.00797106	-0.0238012	0.00896966	0.00234582	-0.0236604	0.00777588	0.00741446		0.0180115	0.00427322	2.49798e-05	0.0207081	0.00389962	1.09456e-07	ULK4	RPL36P20, ULK4
5	q32	rs1078721	147857999:148857999	CED	6.08051e-10	-0.0273553	0.00442019	8.38784e-05	-0.0161555	0.00410754	0.0630055		0.00147841	0.0475564	0.0149583	0.98128	-0.00030607	0.0130442	0.00794186		-0.0213393	0.00423899	4.80221e-07	-0.0147257	0.00391789	0.000170882	SH3TC2	ABLIM3
7	q36.1	rs891511	150204843:151204843	CED	8.55208e-10	-0.0236254	0.00385111	5.44095e-12	-0.0245452	0.00356036	0.0303358		0.240618	0.010826	0.0092256	0.000149335	0.0303092	0.00799158	0.0478893		-0.018513	0.0035539	1.89655e-07	-0.0154607	0.00325221	1.99526e-06	NOS3	NOS3, AGAP3, TMEM176A, ATG9B
2	q32.1	rs12693302	182711443:183711443	CED	8.82901e-10	-0.0227951	0.00371884	2.7979e-10	-0.0217596	0.00344846	0.00334989	CED	0.0581825	0.0186218	0.00982984	5.11116e-05	0.0346667	0.00855748	0.0623369		-0.0176094	0.00347825	4.13289e-07	-0.0138767	0.00319852	1.43485e-05	PDE1A
10	p12.33	rs1888693	17940444:18940444	CED	1.30137e-09	0.0217837	0.00359017	0.00350733	0.00971954	0.00332928	0.0137415	SSE_Female	0.000278102	0.0351193	0.00966022	0.960855	-0.000412329	0.00840101	0.00275646		0.0234021	0.00336528	3.55122e-12	0.00834431	0.0030951	0.00701825	CACNB2	CACNB2
9	q34.2	rs115478735	135649711:136649711	SSE	1.57678e-09	-0.0275564	0.00456484	0.000957287	-0.014042	0.0042515	0.00248248		0.00353771	-0.0337612	0.011574	6.59096e-05	-0.0399816	0.0100177	0.0299976		-0.0283917	0.00424649	2.29494e-11	-0.018001	0.00391363	4.2337e-06	ABO	ABO
20	p12.2	rs889509	10124190:11124190	CED	2.1695e-09	-0.021767	0.00363698	3.07557e-12	-0.0235235	0.00337268	0.0073723	SSE_Female	9.8644e-05	0.036443	0.00935735	0.124188	0.0124943	0.00812655	0.0144368		-0.0141274	0.00338993	3.08016e-05	-0.0182313	0.00311506	4.8388e-09	JAG1	SLX4IP, MKKS
12	q13.11	rs11168250	47709165:48709165	SSE	2.2001e-09	-0.0249782	0.00417511	0.0376564	-0.00801264	0.00385484	0.0013217		0.316927	-0.00963953	0.00963167	0.0208125	-0.0193039	0.00835129	0.0809852		-0.0225519	0.00383069	3.92878e-09	-0.00999583	0.00349997	0.00429051	HDAC7	HDAC7, RPAP3, RAPGEF3, AC004241.1, SLC48A1
2	p22.1	rs13032770	40071341:41071341	SSE	3.26741e-09	-0.0232443	0.00392779	0.0728329	-0.00651753	0.00363319	0.000569451		0.956874	-0.00051313	0.00948873	0.00415944	-0.0235218	0.00820715	0.0158353		-0.0199191	0.00362915	4.05038e-08	-0.00930384	0.00332222	0.00510249	SLC8A1	SLC8A1
15	q25.1	rs62012629	78570351:79570351	CED	3.93096e-09	-0.0238869	0.00405728	5.49096e-08	-0.0203732	0.00374862	0.0111984		0.00238653	0.0280549	0.00923553	0.266685	0.00886283	0.00797915	0.0137378		-0.0154841	0.00371463	3.06738e-05	-0.0150871	0.00339285	8.71833e-06	ADAMTS7	ADAMTS7P3, ADAMTS7, TBC1D2B
1	q43	rs7535162	242925689:243925689	CED	5.18017e-09	0.02215	0.00379177	4.07988e-17	0.029696	0.00353045	0.104206	CED	8.61876e-05	0.03798	0.00967095	0.0409432	0.0171823	0.00840544	0.00956744		0.0242592	0.00353013	6.3286e-12	0.0278194	0.00325499	1.26651e-17	SDCCAG8	CEP170, SDCCAG8
10	q25.3	rs1801253	115305056:116305056	CED	6.39627e-09	0.0229789	0.00395753	8.90934e-15	0.0284368	0.0036671	0.175377	AED	0.000122313	-0.0392859	0.0102251	0.108565	-0.0141388	0.00881075	0.00923755		0.0148668	0.00369074	5.622e-05	0.0221505	0.00338557	6.04525e-11	ADRB1	VWA2, ADRB1
6	q14.1	rs7753358	79165210:80165210	CED	6.64464e-09	0.021221	0.00365879	6.63079e-07	0.0168848	0.00339593	0.0479417		0.030453	0.0204274	0.00943841	1.49144e-06	0.0391711	0.00813811	0.000179546		0.0211173	0.00341144	6.01045e-10	0.02019	0.00313401	1.17749e-10	PHIP	PHIP, IRAK1BP1
15	q26.1	rs4932373	90929287:91929287	CED	1.02205e-08	0.0216959	0.00378813	1.06748e-17	0.0300627	0.00350901	0.0612047	CED	0.0345454	0.0191868	0.00907704	0.000174034	0.0294553	0.00784544	0.153282		0.0213237	0.00349591	1.06321e-09	0.0299614	0.00320321	8.47363e-21	FES	FES, PHAX, MAN2A2, RCCD1, FURIN
12	q24.31	rs7953894	122904966:123904966	AED	1.10306e-08	0.0204017	0.00357024	0.00750911	0.00883787	0.00330584	0.0174733		0.734248	-0.00449161	0.0132307	0.0174295	0.0271707	0.0114276	0.0350646		0.0187121	0.00344695	5.67988e-08	0.0102536	0.00317563	0.00124295	VPS37B, ABCB9	ABCB9, PITPNM2, ARL6IP4, RILPL2, KMT5A, MPHOSPH9, VPS37B, CDK2AP1, DDX55
6	p22.1	rs3129817	29842753:30842753	CED	1.74161e-08	-0.0281835	0.00500047	7.01893e-06	-0.0208527	0.0046409	0.0260494		0.00977141	-0.0309742	0.0119868	1.88373e-05	-0.0440145	0.0102864	0.000148767		-0.0285972	0.004615	5.77082e-10	-0.02477	0.00423028	4.75882e-09	UBQLN1P1, MICC	LINC00243, HLA-J, HCG18, HLA-DQA1, TRIM31, HLA-H, ZNRD1ASP, HLA-G, HCG4, PPP1R18, CCHCR1, HLA-A, TUBB, BTN3A2, TRIM10, ZNRD1, POU5F1, HLA-C, ZFP57, GABBR1, C4A, IER3, HLA-K, FBRSL1, TRIM26, HLA-DQB1, TRIM15, HLA-L, TMEM154, HLA-DRB1, VARS2, DDX39BP2, HLA-B, HLA-DPB1, FLOT1
1	p13.2	rs72699046	112538761:113538761	CED	2.03313e-08	0.0214068	0.0038162	3.18977e-06	0.0164446	0.00353012	0.241816		0.113023	0.0153634	0.00969414	4.87244e-05	0.0342038	0.00841998	0.00143989		0.0205959	0.00355096	6.62767e-09	0.0190995	0.00325557	4.44488e-09	WNT2B	ST7L
15	q26.2	rs4984497	96135899:97135899	CED	2.46943e-08	-0.021149	0.00379308	5.54235e-07	-0.0175653	0.00350836	0.0446778		0.421068	0.00770416	0.00957534	0.08039	0.0145374	0.00831429	0.0493693		-0.0172355	0.00352647	1.02145e-06	-0.0127132	0.00323237	8.38655e-05	RP11-236L14.1, NR2F2-AS1
11	p11.12	rs7121968	48812255:49812255	CED	2.73767e-08	0.0217149	0.00390715	0.000361493	0.0129095	0.00361938	0.0291768		0.263188	0.0174029	0.0155534	0.00504518	0.0377873	0.0134746	0.0825408		0.0214589	0.00378941	1.48864e-08	0.0145836	0.00349548	3.01742e-05	FOLH1, CTD-2026G22.1	FOLH1B, TRIM51DP, ANKRD33B, ENPEP, FOLH1
20	p12.2	rs78845099	10243612:11243612	CED	2.90868e-08	-0.0220705	0.00397873	4.14165e-19	-0.0330532	0.00369966	0.0305183		0.204622	0.013618	0.0107352	0.0651027	0.017198	0.00932337	0.0584519		-0.0177603	0.00373074	1.93087e-06	-0.026217	0.00343881	2.46229e-14	RP1-278O22.2
15	q23	rs11853359	71121524:72121524	CED	2.93896e-08	-0.0208681	0.00376319	8.97018e-05	-0.0136918	0.00349552	0.00497868		0.0286557	0.0474527	0.0216845	0.45507	0.0138543	0.0185466	0.0200711		-0.0188706	0.00370777	3.59042e-07	-0.0127469	0.00343504	0.000206577	THSD4	THSD4
20	q13.32	rs73306876	57239829:58239829	CED	4.38657e-08	0.0316815	0.00578677	7.61949e-13	0.0385306	0.0053751	0.0706449	CED	0.00128884	0.044641	0.0138686	0.0562383	0.0230904	0.012094	0.0360457		0.0336032	0.00534051	3.13136e-10	0.0359838	0.00491183	2.3723e-13	MRPS16P2, ZNF831	ZNF831
15	q15.1	rs8038764	41407905:42407905	AED	4.45961e-08	-0.0194607	0.00355649	4.15259e-05	-0.0135278	0.00330032	0.0167017		0.448747	-0.00725983	0.00958369	0.00620856	0.0224787	0.00821365	0.00923361		-0.0179839	0.0033343	6.90649e-08	-0.00852262	0.00306236	0.00538544	RP11-380D11.2, MGA	GCHFR, MAPKBP1, PLA2G4B, JMJD7-PLA2G4B, RPAP1, JMJD7, TYRO3
11	p11.2	rs7117386	47625371:48625371	CED	4.89742e-08	0.0220794	0.00404736	0.000139744	0.0142978	0.00375397	0.0334733		0.384679	-0.0160574	0.0184711	0.00102967	-0.0532768	0.0162301	0.0172641		0.0203322	0.00395356	2.70728e-07	0.0108663	0.00365741	0.00296808	PTPRJ	NUP160, MYBPC3, ACP2, NR1H3, ENPEP, C1QTNF4, DDB2, PTPRJ
19	q12	rs17513752	29790811:30790811	CED	5.05588e-08	0.0205896	0.00377818	1.46898e-12	0.0247922	0.00350277	0.18694	CED	0.0417488	0.0186697	0.00916923	0.000473746	0.0277877	0.00794949	0.0224491		0.0203109	0.00349325	6.08734e-09	0.0252792	0.0032054	3.10874e-15	C19orf12, CCNE1	CCNE1, C19orf12
20	q13.33	rs6742	61874441:62874441	CED	5.05824e-08	0.0265562	0.00487313	0.000669496	0.0153906	0.00452422	0.00207734		0.0610067	0.0234751	0.0125298	0.179495	0.0146312	0.0108998	0.00359013		0.0261514	0.00454173	8.51034e-09	0.015279	0.00417856	0.000255663	SLC2A4RG	STMN3, ZGPAT
15	q15.1	rs11856572	40844078:41844078	CED	5.22646e-08	-0.0193421	0.00355311	0.000402902	-0.0116797	0.00330099	0.0799622		0.031479	0.0193197	0.00898134	1.56851e-06	0.0374137	0.00778934	0.000455416		-0.0141101	0.00330396	1.94893e-05	-0.00420526	0.00303933	0.166477	INO80	SMAD6, NUSAP1, CHP1, RTF1, NDUFAF1, INO80, OIP5, OIP5-AS1, KNSTRN
6	q22.33	rs62436817	126672542:127672542	CED	5.37801e-08	0.0194315	0.00357288	1.38344e-14	0.025514	0.00331415	0.0727777		1.15972e-05	0.0395187	0.00901023	0.135745	0.0117668	0.00788731	0.000895203		0.0221609	0.00332129	2.51707e-11	0.0234511	0.00305538	1.64998e-14	RPS4XP9, RSPO3
20	q13.33	rs4372964	62207527:63207527	CED	6.15136e-08	0.0223433	0.00412649	2.67167e-06	0.0180274	0.00383994	0.0268837		0.0763542	-0.0204164	0.0115196	0.00236477	-0.0304076	0.0100013	0.022866		0.0174805	0.00388477	6.80355e-06	0.0118047	0.0035848	0.000991232	RGS19	TCEA2, LKAAEAR1, RGS19, OPRL1
11	p11.2	rs7294154	48294660:49294660	CED	7.65385e-08	-0.0203866	0.0037926	4.99894e-05	-0.0142569	0.00351521	0.0504494		0.156546	0.0165779	0.0117007	0.0017236	0.0318017	0.010146	0.00359013		-0.0168722	0.00360781	2.91691e-06	-0.00932071	0.00332151	0.00501342	OR4A44P, RP11-56P9.5	NUP160, FOLH1B, ANKRD33B, ENPEP, PTPRJ
2	p23.3	rs1275988	26414364:27414364	AED	8.33966e-08	-0.0195982	0.00365646	4.70524e-11	-0.0222876	0.00338698	0.368912		0.0294121	0.0219127	0.0100606	0.00396885	0.0249617	0.00866473	0.0621076		-0.0147548	0.00343653	1.75876e-05	-0.016025	0.00315454	3.77506e-07	AC015977.5, KCNK3	AC015977.2, KHK, CIB4, KCNK3
17	p13.1	rs5418	6685092:7685092	CED	8.4002e-08	0.0192553	0.00359336	0.000111928	0.0128487	0.00332588	0.115102		0.573345	0.00510322	0.00906209	0.00198515	-0.0242566	0.00784318	0.00714794		0.0173325	0.00334034	2.11614e-07	0.00719347	0.00306196	0.0188086	SLC2A4	ACAP1, CLDN7, EIF5A, DLG4, ELP5, SLC2A4, ACADVL, CTDNEP1, GRAMD1C, DVL2
20	p12.2	rs6074216	10453438:11453438	AED	1.06218e-07	-0.0463236	0.008714	0.00872665	-0.021245	0.00810069	0.0350435		0.0194258	-0.0259396	0.0110975	0.519645	-0.00609632	0.00946781	0.0361505		-0.038549	0.00685362	1.85918e-08	-0.0148424	0.00615518	0.015893	RP11-103J8.1
12	q13.12	rs7302981	50037815:51037815	CED	1.06697e-07	-0.0195138	0.00367133	7.85071e-09	-0.0196697	0.00340784	0.238773	CED	7.3735e-07	0.0467949	0.00944849	0.00163178	0.0258191	0.0081954	0.00455538		-0.0108157	0.00342207	0.00157461	-0.0129638	0.00314664	3.79067e-05	CERS5	AC074032.1, COX14, DIP2B, ATF1, CERS5, LIMA1, SMARCD1
12	q21.33	rs12229946	89819258:90819258	AED	1.25744e-07	0.020874	0.00394952	0.00291401	0.0109071	0.00366416	0.0643111		0.000802072	-0.0320752	0.00956744	0.301544	-0.00858073	0.00830544	0.01621		0.0131646	0.00365069	0.000310872	0.00773204	0.00335241	0.0210874	RP11-654D12.2	GALNT4
6	p21.33	rs2523578	30828542:31828542	CED	1.27776e-07	0.0205527	0.0038909	6.15738e-13	0.0259934	0.00361147	5.01284e-05	CED	0.494961	0.00647551	0.0094886	1.64379e-05	0.0355203	0.00824303	0.0016248		0.0185264	0.00359999	2.65774e-07	0.0275276	0.00330792	8.66816e-17	XXbac-BPG248L24.12, DHFRP2	FAM8A1, TSSC4, DDR1, OR13C3, LINC00243, LST1, HLA-DQA1, STK19B, HLA-H, CD8A, HLA-G, RNF5, CCHCR1, HLA-S, HLA-DRB5, NFKBIL1, HLA-A, ATP6V1G2, TUBB, GALNT2, BTN3A2, KLRK1, TCF19, HCG27, AL671883.2, PSMA4, PSORS1C2, POU5F1, CD248, MICA, HLA-C, HCP5, TNXA, LY6G5B, IER3, CYP21A1P, PSORS1C3, SLC44A4, FLOT1, TNXB, PSORS1C1, HLA-DQB1, BAG6, HLA-DRA, DDAH2, HLA-DRB1, TMEM154, C4B, TSBP1, NCR3, PBX2, LY6G5…
3	q26.2	rs9850919	168677924:169677924	CED	1.29764e-07	0.01905	0.00360835	4.79028e-17	0.0281774	0.00335743	0.0310419		0.0347163	0.0190238	0.00900845	0.000849578	0.0259515	0.00777823	0.0649055		0.0190464	0.00334963	1.29964e-08	0.0278278	0.00308252	1.75473e-19	RP11-641D5.2
12	q21.33	rs11105381	89606835:90606835	AED	1.43169e-07	0.024003	0.00456211	0.00239161	0.0128862	0.00424339	0.0100945		0.004044	-0.0540502	0.0188001	0.370313	-0.0144583	0.0161383	0.0199187		0.0196624	0.00443344	9.20676e-06	0.0111179	0.0041039	0.00674623	LINC00936, RNA5SP365	POC1B
15	q26.2	rs12906962	94812071:95812071	CED	1.90125e-07	0.0199438	0.00382873	2.34988e-12	0.0249129	0.00355267	0.0122238	CED	0.623861	0.006381	0.013012	0.000150822	0.0424267	0.0111939	0.00429114		0.0188631	0.00367302	2.81282e-07	0.0265156	0.00338622	4.86166e-15	RP11-57P19.1, CTD-2576F9.1
20	p12.2	rs2423514	10193337:11193337	CED	2.04843e-07	0.0192565	0.00370665	0.000139612	0.0130801	0.00343406	0.0417793		0.00012052	0.0475455	0.0123632	0.135517	0.0159686	0.0106976	0.0107346		0.0215896	0.00355051	1.19651e-09	0.0133499	0.00326972	4.44765e-05	RP11-103J8.1
7	q32.3	rs11767602	130691691:131691691	CED	2.15647e-07	-0.0192265	0.00370771	0.365409	-0.00310553	0.00343112	0.00141685		0.193153	0.011756	0.0090337	0.000203683	0.029031	0.00781488	0.000123587		-0.0147598	0.00343005	1.68429e-05	0.00208811	0.00314166	0.506274	PODXL	MKLN1
1	p13.2	rs351364	112545061:113545061	AED	2.56188e-07	0.0211288	0.00410003	5.60429e-07	0.019036	0.00380374	0.0735505		0.622147	0.00511913	0.0103875	0.000580057	-0.0309934	0.00900679	0.00431157		0.0189708	0.0038137	6.5458e-07	0.0114636	0.00350407	0.00106971	WNT2B	MOV10, RHOC, CTTNBP2NL, WNT2B
11	q12.2	rs7931683	60763581:61763581	CED	2.98604e-07	-0.0319827	0.00624108	3.17357e-14	-0.0443443	0.0058412	0.0934558	CED	0.169313	-0.0194897	0.0141799	0.000158657	-0.0463216	0.0122623	0.0481828		-0.0299553	0.00571227	1.57107e-07	-0.04471	0.00527345	2.2848e-17	PPP1R32, RP11-286N22.10	SYT7
11	p15.4	rs56287081	9692992:10692992	CED	4.12286e-07	0.0230694	0.00455609	1.78147e-10	0.0270601	0.00424176	0.00443595	CED	0.486145	0.00961734	0.0138088	1.46462e-06	0.0581193	0.0120657	4.37431e-05		0.0217488	0.00432667	4.99058e-07	0.0304765	0.00400168	2.61791e-14	SBF2	SBF2, ADM, SWAP70
14	q11.2	rs35085068	22909909:23909909	CED	5.37148e-07	-0.0179844	0.00358773	0.0931478	-0.00558503	0.00332634	0.0065331		0.37887	-0.00811777	0.00922476	0.0302492	0.0173732	0.00801752	0.0185044		-0.016688	0.00334374	6.01205e-07	-0.00221358	0.00307241	0.471235	RP11-298I3.1	PRMT5, AJUBA, REM2, RBM23, AL132780.1, C14orf93, HAUS4
17	q21.31	rs2301597	42673273:43673273	CED	6.84838e-07	-0.0178801	0.00360063	2.4254e-08	-0.0186173	0.00333715	0.0812564		0.314692	0.0118044	0.0117404	0.00456748	0.0285843	0.0100782	0.0511879		-0.0153281	0.00344238	8.47716e-06	-0.0139533	0.00316799	1.06046e-05	NMT1	LINC02210, HEXIM1, DCAKD, SPATA32, HEXIM2, ACBD4, DND1P1, LRRC37A4P, NMT1
17	p13.3	rs6503187	1449098:2449098	CED	9.6096e-07	-0.01764	0.00360024	0.00625166	-0.00914116	0.00334313	0.0270558		0.00034832	-0.0344097	0.0096198	0.165525	-0.0115742	0.00834621	0.00601533		-0.0197003	0.00337184	5.13936e-09	-0.00947756	0.00310342	0.00225883	RP11-667K14.3, MIR132	HIC1, DPH1, SRR, SGSM2
6	p21.32	rs1053924	31620715:32620715	AED	1.1864e-06	0.0175722	0.00361711	0.00628193	0.00918234	0.00336014	0.0874429		0.00120688	-0.0404348	0.0124889	0.00734596	-0.0291791	0.010884	0.00375218		0.013083	0.00347433	0.000166142	0.00584427	0.00321062	0.0687144	PRRT1	ATF6B, LST1, HLA-DQA1, RNF5, CCHCR1, AGER, ATP6V1G2, HLA-DRB5, HLA-DQB1-AS1, HLA-C, AGPAT1, C4A, SLC44A4, TNXB, LIMS1, HLA-DQB1, DDAH2, HLA-DRB1, C4B, HLA-DQB2, PSMB9, TOM1, PPT2, PRRC2A, HLA-DQA2, CYP21A2, NOTCH4, HLA-B, EGFL8, HLA-DRB6, DHX30
20	p12.2	rs6040220	10364516:11364516	AED	1.25969e-06	-0.0174428	0.00359928	1.71537e-08	-0.0188144	0.00333663	0.0347481		0.0628081	0.0168156	0.00903756	0.200063	0.0100317	0.0078287	0.156256		-0.012753	0.00334385	0.000136819	-0.01438	0.00306947	2.8017e-06	RP4-697P8.3
5	q33.3	rs2161356	157904129:158904129	CED	1.32343e-06	-0.0172929	0.00357558	6.42706e-06	-0.0149749	0.00331893	0.164497		0.00374933	0.026481	0.00913511	0.613975	0.00399576	0.00792162	0.0314708		-0.0114776	0.00332961	0.000566607	-0.0121421	0.00306112	7.2917e-05	EBF1	EBF1
9	q34.2	rs10993958	136035677:137035677	CED	1.45909e-06	-0.0322393	0.00669289	4.06327e-09	-0.0366498	0.00623096	0.62958	CED	0.0350381	-0.0353231	0.0167563	7.00669e-05	-0.0578956	0.0145592	0.154606		-0.0326636	0.00621542	1.47824e-07	-0.0399388	0.00572839	3.12298e-12	SARDH
8	q24.12	rs58659618	119920239:120920239	CED	1.47322e-06	-0.0205363	0.00426505	1.55963e-13	-0.0292203	0.00395803	0.132955	SSE_Female	0.673478	-0.00465565	0.0110484	6.27312e-07	-0.047112	0.00945336	0.00165462		-0.0184767	0.00397887	3.42233e-06	-0.0318889	0.00365094	2.44847e-18	SNORA32, NOV	CCN3, RPL10
10	q23.33	rs4110517	96150328:97150328	CED	1.58345e-06	0.0176265	0.00367173	3.94229e-07	0.0173362	0.00341807	0.0250051		0.0143681	0.0487325	0.0199062	0.0708249	0.0306492	0.0169646	0.0861921		0.01865	0.00361082	2.40404e-07	0.0178556	0.00335073	9.8837e-08	RP11-400G3.3, CYP2C9	TBC1D12, HELLS, PDLIM1
5	q23.3	rs17677603	127357493:128357493	CED	1.61758e-06	0.0176173	0.00367309	0.0156132	0.00824686	0.00341082	0.0608903		0.0055645	-0.0249464	0.00899728	0.750426	-0.00248239	0.00780429	0.0198438		0.0115369	0.00340063	0.000692395	0.00652616	0.00312537	0.0367867	FBN2	FBN2
1	p36.22	rs13305986	11408505:12408505	CED	1.64228e-06	-0.0352917	0.00736274	0.00655754	-0.0185781	0.00683382	0.0961527		0.00152135	-0.135395	0.0426986	0.498612	0.0251731	0.0372008	0.00228885		-0.0381822	0.00725566	1.42184e-07	-0.0171499	0.00672135	0.0107245	NPPA, NPPB	NPPA, CLCN6
8	q24.3	rs145183312	143517469:144517469	CED	1.89393e-06	-0.0169766	0.00356307	0.00309564	-0.00976087	0.00329969	0.106704		0.000187443	0.0335676	0.00898499	0.971565	0.00027862	0.00781626	0.00226698		-0.0101082	0.00331214	0.00227424	-0.0082423	0.00303991	0.0067007	CYP11B2, RP11-273G15.2	LY6D, LY6E, GML, LYNX1, THEM6, LYPD2
16	p13.3	rs139491786	1586421:2586421	CED	2.03443e-06	-0.101363	0.0213389	3.68765e-07	-0.101878	0.0200365	0.239236		0.000682975	-0.179459	0.052832	0.0131441	-0.117655	0.0474421	0.172018		-0.112316	0.0197859	1.37419e-08	-0.104266	0.0184579	1.61503e-08	SLC9A3R2
12	q24.21	rs35443	115052878:116052878	CED	2.11502e-06	-0.0172674	0.00364116	2.11916e-11	-0.0226473	0.00338121	0.0505076	SSE_Female	0.668233	0.00482533	0.0112589	0.000148058	0.036633	0.00965359	0.00784423		-0.0151755	0.00346449	1.18513e-05	-0.0161696	0.00319113	4.04049e-07	RP11-25E2.1, RP11-116D17.2
11	q11	rs11229818	54732549:55732549	AED	2.12689e-06	0.0170051	0.0035867	0.0158205	0.00802412	0.0033253	0.0358244		0.123976	-0.0216068	0.0140454	0.00840326	-0.0322121	0.012222	0.0221735		0.0146413	0.00347518	2.51876e-05	0.00525093	0.00320866	0.101738	OR4A17P, OR4A13P	OR4A15
14	q21.3	rs72681869	50155357:51155357	CED	2.27949e-06	-0.0808262	0.0170985	3.76806e-07	-0.0796595	0.0156794	0.381716		0.000113925	-0.163083	0.042255	0.0106685	-0.0931515	0.0364796	0.014124		-0.0924	0.01585	5.55452e-09	-0.0817633	0.0144052	1.379e-08	SOS2
1	q32.1	rs882624	201235913:202235913	CED	2.39107e-06	-0.0177492	0.00376251	7.37714e-09	-0.0201599	0.00348644	0.0795365		0.00503994	0.0257648	0.00918617	0.777053	-0.00226337	0.00799312	0.01022		-0.011498	0.00348178	0.000958812	-0.0172993	0.00319567	6.18598e-08	IPO9-AS1	NAV1, RNPEP
1	p13.2	rs12126684	112723233:113723233	CED	2.45641e-06	0.0206779	0.00438846	2.13865e-09	0.0243406	0.00406543	0.0489505		0.568208	-0.00642337	0.0112552	2.3818e-05	0.0412217	0.0097535	0.000689299		0.0171015	0.00408866	2.88108e-05	0.0268393	0.0037525	8.52838e-13	MOV10	MOV10, ST7L, WNT2B
10	q23.33	rs1934967	96241426:97241426	CED	3.07618e-06	0.0196934	0.00422077	2.11277e-05	0.0166927	0.00392517	0.0397823		0.443058	-0.00762534	0.00994108	0.0359089	-0.0180294	0.00859344	0.0292203		0.0155209	0.00388509	6.46981e-05	0.010699	0.00357035	0.00272987	CYP2C9	CYP2C8, TBC1D12, HELLS, NOC3L
1	q21.3	rs35479618	153162423:154162423	AED	3.4495e-06	0.0628655	0.0135421	2.50424e-07	0.065076	0.0126175	0.272296		0.947667	-0.00227564	0.0346697	0.00195666	0.0898313	0.029006	0.0207942		0.0542425	0.012614	1.70654e-05	0.0690149	0.0115702	2.44828e-09	NPR1	S100A13
6	q25.3	rs75391241	159171268:160171268	AED	3.82195e-06	0.0894882	0.0193656	0.437391	-0.0139982	0.0180248	6.8498e-05		0.801081	-0.00241137	0.00957077	0.00371363	-0.0240566	0.00829044	0.0378183		0.0156287	0.00858012	0.0685307	-0.0223003	0.00753194	0.00306878	FNDC1
11	p11.12	rs61463018	50173092:51173092	CED	3.99371e-06	-0.0231309	0.00501551	0.000108821	-0.0180026	0.00465169	0.043545		0.0601425	0.0252473	0.0134305	0.00045653	0.0408728	0.0116599	0.023334		-0.0172099	0.00469857	0.000249484	-0.00991867	0.00432055	0.0216933	RP11-574M7.2, AC110283.1
5	p13.3	rs2859814	32172781:33172781	CED	4.67892e-06	-0.0178012	0.00388771	0.00163409	-0.0113364	0.00359909	0.0398399		0.698548	0.00696692	0.0179891	0.0441326	-0.0319225	0.0158589	0.0198438		-0.016696	0.00379998	1.11434e-05	-0.0123447	0.00350984	0.000436162	CTD-2004A9.1, NPR3
10	q25.3	rs180940	115222411:116222411	CED	5.39447e-06	0.017255	0.00379315	5.62097e-11	0.0230388	0.00351529	0.0890047		0.0229123	-0.021509	0.00945432	0.117606	-0.0127394	0.00814049	0.0240586		0.0118804	0.00352038	0.000738852	0.0174156	0.00322724	6.79757e-08	NHLRC2, ADRB1	CASP7
1	p36.22	rs11801879	11428819:12428819	CED	7.24082e-06	-0.0371203	0.00827354	0.0247303	-0.0173059	0.00770654	0.0469433		0.819987	0.00395617	0.0173849	0.0212392	-0.0345173	0.0149827	0.0297207		-0.0295351	0.00747068	7.70288e-05	-0.0209068	0.00685312	0.00228308	NPPB, RP5-934G17.6	NPPA, MTHFR, MFN2, PLOD1, NPPB, KIAA2013
6	p21.33	rs3020644	31394626:32394626	CED	7.62284e-06	0.0165013	0.0036869	1.85944e-08	0.0192286	0.00341851	0.0591147	CED	8.93081e-05	-0.0363688	0.00928098	3.29918e-07	-0.041124	0.00805315	0.0516981		0.00929508	0.00342644	0.00667268	0.0100138	0.00314673	0.00146114	C2	EHMT2, C6orf48, ATF6B, LST1, HLA-DQA1, HLA-H, HLA-G, NELFE, HLA-S, HLA-DRB5, HLA-A, HSPA1B, AIF1, MICA, HLA-C, TNXA, CSNK2B, LY6G5B, CYP21A1P, PSORS1C3, SLC44A4, TNXB, MICB, HLA-DQB1, HLA-DRA, BAG6, DDAH2, HLA-DRB1, C4B, PRRC2A, TSBP1, PPT2, NCR3, PBX2, HSPA1A, VARS2, HLA-B, EGFL8, HLA-DRB6
11	p11.12	rs11246486	50792160:51792160	CED	7.62845e-06	-0.0232987	0.00520583	0.000319778	-0.0173698	0.00482656	0.0905784		0.70097	0.00554901	0.0144499	0.0319451	0.0268653	0.0125235	0.0141576		-0.0199846	0.00489768	4.49536e-05	-0.0116491	0.00450366	0.00969313	AC110283.1, OR4A6P	ENPEP, FOLH1B, AC024405.1
15	q26.1	rs56340611	90907618:91907618	CED	8.20965e-06	-0.0357106	0.00800724	0.00327973	-0.0218303	0.0074246	0.203686		0.134783	-0.0312542	0.0208981	0.220499	-0.0223201	0.0182171	0.141253		-0.0351401	0.00747717	2.60603e-06	-0.0219001	0.00687549	0.00144636	RN7SL363P, FURIN	FES
2	p21	rs67584485	43262195:44262195	CED	9.61001e-06	-0.0160877	0.00363489	1.27689e-07	-0.0177496	0.00336018	0.0270641		0.998361	1.91565e-05	0.00932594	0.00212565	0.0246256	0.00801526	0.00256461		-0.0139635	0.00338674	3.73958e-05	-0.0114155	0.00309888	0.000229844	THADA	THADA, PLEKHH2
1	p36.32	rs2493291	2829384:3829384	CED	9.6734e-06	0.0228328	0.00516055	1.38066e-11	0.0324227	0.004796	0.102311		0.0630353	0.0168083	0.00904142	0.658612	-0.00348074	0.00787792	0.0342063		0.0213524	0.00448189	1.89641e-06	0.0227142	0.00409656	2.9447e-08	PRDM16	PRDM16
7	q32.2	rs11556924	129163496:130163496	CED	9.89532e-06	-0.0160553	0.00363276	1.22075e-07	-0.0178914	0.00338175	0.00373908		0.513852	-0.011875	0.0181892	0.000319596	-0.0573158	0.0159242	0.0148803		-0.015895	0.00356241	8.12517e-06	-0.0195927	0.00330798	3.16401e-09	ZC3HC1	DSC1, KLHDC10
9	q32	rs117072385	116091380:117091380	CED	1.00178e-05	-0.0551357	0.0124828	0.322197	-0.0114382	0.0115542	0.0064326		0.107131	-0.0210676	0.013075	0.550859	0.00674531	0.0113085	0.0529919		-0.0388906	0.00902877	1.65178e-05	-0.00215105	0.00808178	0.790115	AL157702.1, RP11-534I8.1
2	q11.2	rs810057	96515073:97515073	SSE	1.12145e-05	0.0165027	0.00375705	3.98483e-10	0.0217843	0.00348273	0.00653834	CED	0.159447	0.0154905	0.0110098	3.85236e-08	0.0522852	0.00950843	0.00571447		0.0163971	0.00355572	3.99816e-06	0.0253922	0.00327026	8.19104e-15	NCAPH	AC008268.1, GPAT2, ANKRD36C, ZNF514, NEURL3, LMAN2L, ASTL, KANSL3, LINC00342, SNRNP200, ITPRIPL1, DUSP2, ANKRD36B, FAHD2CP, CIAO1, TMEM127, CNNM4, ARID5A
11	p11.12	rs12794900	49376651:50376651	CED	1.17055e-05	-0.0228646	0.00521649	0.000190159	-0.0180318	0.00483189	0.0476984		0.00667431	0.341452	0.125861	0.17412	0.166709	0.12266	0.0176288		-0.0222398	0.00521202	1.98089e-05	-0.0177456	0.00482815	0.000237438	RP11-163O19.11	FOLH1B, TRIM51DP, ANKRD33B, ENPEP
11	q24.3	rs7936928	129779168:130779168	CED	1.20574e-05	0.0159435	0.00364283	1.02663e-14	0.0260462	0.00336664	0.00634399	AED	0.152741	-0.01322	0.009245	1.63305e-05	-0.0344239	0.00798586	0.000613426		0.0120241	0.00338921	0.000388541	0.0169209	0.00310223	4.91309e-08	ADAMTS8	AP002986.1
12	q24.11	rs10774611	110883036:111883036	CED	1.44239e-05	-0.0156155	0.00360017	2.85099e-10	-0.0210635	0.00333969	0.154224	CED	0.0387579	0.0188947	0.00914168	0.00029643	0.0285834	0.00789857	0.0125903		-0.0109818	0.00334977	0.00104401	-0.0135338	0.00307603	1.0836e-05	RP1-46F2.2	FAM216A, LINC01405, MAPKAPK5-AS1, TCTN1, SH2B3, GPN3
16	q21	rs35686695	60123261:61123261	CED	1.46506e-05	-0.016843	0.00388623	0.000482342	-0.0125902	0.00360706	0.0952798		0.00140446	-0.0448907	0.0140542	0.825672	-0.0027188	0.0123437	0.000738193		-0.0188352	0.00374567	4.94221e-07	-0.0118136	0.00346226	0.00064465	RP11-354I13.1, GNPATP
12	q24.31	rs28625019	123407563:124407563	CED	1.48464e-05	-0.0195106	0.00450478	1.64079e-09	-0.0251792	0.00417552	0.00474951		0.0294964	0.0199259	0.00915323	0.605048	0.00410835	0.00794406	0.0503374		-0.0118211	0.00404181	0.00344792	-0.0188394	0.00369606	3.44796e-07	RILPL2	ABCB9, PITPNM2, ARL6IP4, KMT5A, MPHOSPH9, C12orf65, CDK2AP1, SBNO1, EIF2B1
6	q16.1	rs4346856	96380270:97380270	CED	1.99552e-05	0.0191926	0.00449946	0.322114	0.00411861	0.00415969	0.000395755		0.0707288	0.0401339	0.0222066	0.447907	0.0145643	0.0191909	0.0507532		0.0200184	0.00440985	5.63931e-06	0.00458735	0.00406529	0.259143	UFL1-AS1	UFL1
17	q23.2	rs1476781	58976415:59976415	CED	2.1743e-05	0.018474	0.00435058	0.0373491	0.00841548	0.00404213	0.018281		0.491754	0.0140811	0.0204806	0.00887883	-0.0461339	0.0176296	0.0105681		0.0182843	0.00425562	1.73508e-05	0.00569106	0.0039399	0.148607	RP11-332H18.4	AC005746.2, TBX2, TBX2-AS1
17	q21.32	rs4363897	46315947:47315947	CED	2.23411e-05	0.0455657	0.010746	0.0511289	0.019539	0.0100179	0.0526152		0.408383	-0.0209047	0.0252852	0.0711137	0.0397122	0.0220035	0.0352677		0.0353967	0.00988991	0.000344819	0.0230027	0.00911741	0.0116379	CTD-2377D24.4, TTLL6
11	q22.1	rs35165060	99934951:100934951	CED	2.25723e-05	-0.0153154	0.00361388	6.25505e-07	-0.0167382	0.00335882	0.191325		0.499943	0.0103048	0.0152756	0.0041367	0.0381189	0.0132923	0.00367178		-0.0139575	0.0035168	7.22383e-05	-0.0134457	0.00325646	3.64456e-05	CNTN5, RN7SL222P
5	q33.3	rs7720047	156923813:157923813	CED	2.26377e-05	0.0168986	0.00398808	0.0107923	0.00945029	0.0037069	0.020981		0.110875	-0.0162601	0.0101987	0.00100506	-0.0291397	0.00885863	0.0132567		0.0125008	0.00371421	0.000763608	0.00370002	0.00341958	0.279248	MARK2P11, CTB-47B8.4
11	p11.2	rs4752977	46800429:47800429	CED	2.52556e-05	-0.0196025	0.00465328	3.20752e-07	-0.0221005	0.00432408	0.0614129		0.142551	0.013703	0.00934457	0.0102823	0.0208328	0.0081177	0.0298645		-0.0129847	0.0041654	0.00182527	-0.0126111	0.00381641	0.000951657	MADD	RAPSN, ACP2, NUP160, MYBPC3, C11orf49, PTPRJ, C1QTNF4, NR1H3, MADD, PSMC3, DDB2, SPI1
8	p23.1	rs7837979	9698534:10698534	CED	2.84395e-05	0.0151065	0.00360905	1.32279e-16	0.0276042	0.00333695	0.000551957		2.23873e-05	0.0391992	0.00924392	0.0296025	0.0173192	0.00796116	0.00256608		0.0182932	0.0033619	5.28854e-08	0.0260673	0.00307754	2.45041e-17	MSRA	RP1L1, FAM86B3P, NEIL2, FDFT1, FAM66A, XKR6, CLDN23, AF131215.2, FAM167A, BLK, MSRA, SLC35G5
16	p12.1	rs2188717	24230230:25230230	CED	2.92835e-05	0.0158896	0.00380218	0.176971	0.00476636	0.00353025	0.0320427		0.983157	-0.000214019	0.0101374	0.00035282	-0.0317281	0.00887884	0.00435535		0.0139036	0.00356002	9.40331e-05	-0.000215413	0.00328046	0.947644	AC012317.1, TNRC6A	SLC5A11, TNRC6A
12	q24.21	rs7964325	114868787:115868787	CED	3.52747e-05	0.0154637	0.00373831	0.0272742	0.00765912	0.00346945	0.125955		0.459082	-0.00686531	0.00927278	0.00926316	-0.0210157	0.00807567	0.0160668		0.012342	0.00346716	0.000371309	0.00319122	0.00318772	0.31678	RP4-601P9.1, RP11-25E2.1
1	p36.22	rs880315	10296866:11296866	CED	4.93659e-05	0.0150261	0.00370218	6.92425e-08	0.0184847	0.00342731	0.0267438		0.000294543	0.0342819	0.00946854	0.224454	0.00994533	0.00818684	0.0252061		0.0175795	0.00344799	3.42363e-07	0.0172113	0.00316146	5.20667e-08	CASZ1	CASZ1, KIF1B, MTF2
10	q21.3	rs7090758	64835315:65835315	CED	5.32979e-05	0.0143583	0.00355334	2.03306e-09	0.0197766	0.00329861	0.00301755	SSE_Female	0.113252	0.0196937	0.0124344	0.000166722	0.0407953	0.0108349	0.0158677		0.0147611	0.00341657	1.55717e-05	0.0215595	0.00315561	8.36736e-12	REEP3	MYL9, NRBF2, CLU, REEP3, MRPL35P2, ITGA2B, PTGS1, VSIG2, JMJD1C, PPBP, AQP10
19	q13.33	rs73046792	49105705:50105705	CED	5.50509e-05	-0.0193059	0.00478677	3.5547e-05	-0.0182961	0.00442495	0.148663		0.991306	-0.000131203	0.0120412	0.00121622	-0.0340168	0.0105141	0.0101895		-0.0166892	0.00444818	0.000175487	-0.0206616	0.00407847	4.06234e-07	SNRNP70	LIN7B
3	p25.3	rs9840982	11064940:12064940	AED	6.20088e-05	0.0179872	0.00449103	0.26789	0.00463726	0.00418548	0.0220372		0.053246	-0.0191602	0.00991203	0.0184639	-0.0202126	0.00857809	0.0281569		0.0116601	0.00409072	0.00436672	-0.000141192	0.0037616	0.970058	ATG7	ATG7, HRH1, VGLL4
13	q12.3	rs7328697	31666025:32666025	AED	7.90911e-05	0.0141355	0.0035811	0.424011	0.00265303	0.00331843	0.00107649		0.305611	0.00924309	0.00902208	0.0688808	-0.0141773	0.00779288	0.0103393		0.0134696	0.00332848	5.19292e-05	6.96351e-05	0.00305314	0.981804	B3GALTL, RXFP2
12	q24.13	rs2189271	112700293:113700293	CED	8.82978e-05	-0.0140986	0.00359586	2.39077e-09	-0.0198966	0.00333329	0.134205	AED	0.299217	0.010348	0.00996787	0.00331636	0.0253401	0.00862788	0.0447227		-0.0112835	0.0033825	0.000850355	-0.0140216	0.00310931	6.49697e-06	RPH3A	OAS1
5	q12.1	rs13163533	61092576:62092576	CED	9.82018e-05	0.0256365	0.00658174	1.00782e-10	0.0396111	0.00612591	0.00559395		0.00119601	0.142995	0.0441311	0.349207	-0.0347393	0.037109	0.00102644		0.0281901	0.00650974	1.48806e-05	0.0376387	0.00604411	4.74421e-10	RN7SKP157, KIF2A
4	q32.1	rs56329057	156133444:157133444	CED	0.000102326	-0.0176776	0.00455009	6.05959e-09	-0.0246549	0.0042396	0.18718		0.289809	0.00960486	0.00907347	0.0309438	0.0170057	0.00788071	0.0792699		-0.0121954	0.00406733	0.00271417	-0.015304	0.00373361	4.14957e-05	GUCY1A3	GUCY1A1, AC104083.1
21	q22.2	rs2836411	39319830:40319830	CED	0.000126997	0.0143329	0.00374003	2.8615e-10	0.021887	0.00347058	0.0597205		0.075134	0.0169734	0.00953705	0.0397876	0.0170605	0.00829777	0.0287112		0.0146849	0.00348187	2.47001e-05	0.0211684	0.0032018	3.80726e-11	ERG	KCNJ15
17	p13.1	rs74439044	7281019:8281019	CED	0.000128108	0.0228569	0.0059676	7.99273e-07	0.0275498	0.00558172	0.0688256		0.0699071	0.0249623	0.0137716	0.00246229	0.0363033	0.0119885	0.0929923		0.0231897	0.00547562	2.2846e-05	0.0291093	0.00506015	8.78533e-09	LSMD1	CYB5D1, TMEM88, TNFSF12, KDM6B, ALOX15B, NAA38
8	q12.3	rs16930710	64265141:65265141	AED	0.000137491	0.018395	0.00482462	0.973288	-0.00014974	0.00447186	0.00481641		0.011645	0.0227259	0.00900775	0.353203	0.0072676	0.00782802	0.0429072		0.0193605	0.00425299	5.3089e-06	0.00167527	0.00388294	0.666146	RP11-32K4.1
5	q23.2	rs1579036	122421103:123421103	CED	0.000140744	0.0145088	0.00381113	1.24505e-10	0.0227055	0.00352892	0.0111828		0.00152848	0.0289871	0.0091453	0.000118379	0.0307381	0.00798403	0.00811929		0.0166511	0.00351789	2.20925e-06	0.0240183	0.00322769	9.96842e-14	CSNK1G3	CSNK1G3
2	q36.3	rs2673142	226656645:227656645	CED	0.000141563	0.0136633	0.00359038	0.0510474	0.00649678	0.00332982	0.0152437		0.798538	0.00234108	0.00917199	0.00305567	-0.023577	0.00795898	0.0164102		0.0121589	0.00334335	0.000276113	0.00201693	0.00307182	0.511444	AC068138.1, MIR5702
2	q11.1	rs1813381	95922939:96922939	CED	0.000151402	0.0145899	0.00385075	1.26107e-10	0.0230036	0.00357634	0.0376403	SSE_Female	0.0791123	0.0202947	0.0115578	3.63275e-08	0.0550795	0.00999776	0.00359013		0.0151599	0.00365332	3.33025e-05	0.0266424	0.00336738	2.53475e-15	AC008268.1, AC008268.2	TMEM127, ZNF514, NEURL3, ITPRIPL1, DUSP2, LMAN2L, ANKRD36B, AC008268.1, GPAT2, FAHD2CP, ASTL, ANKRD36C, CIAO1, ARID5A, LINC00342
12	p12.2	rs17375682	19924229:20924229	CED	0.000155713	-0.0157929	0.00417594	5.14865e-09	-0.0227044	0.00388602	0.140009		0.653484	-0.00409642	0.00912478	0.00235376	0.024031	0.00790031	0.00464808		-0.0137674	0.00379718	0.000288197	-0.0135997	0.00348701	9.61491e-05	CTC-465D4.1, RP11-284H19.1
17	q21.32	rs17608766	44513271:45513271	CED	0.000157457	-0.016091	0.00425789	0.0917118	-0.0066713	0.00395584	0.00555729		0.0629146	-0.0170079	0.00914461	0.854467	0.00145408	0.00792748	0.0635701		-0.0162544	0.00385998	2.54244e-05	-0.00505141	0.00353962	0.15355	RP11-156P1.2	FAM215B, LRRC37A, RPRML, GOSR2, ARL17B, NSFP1
5	q31.2	rs41298968	136534169:137534169	AED	0.000175529	-0.0162278	0.00432518	0.0167269	-0.00960528	0.00401445	0.0339968		0.14598	0.0176151	0.0121156	0.0207389	0.0242739	0.0104954	0.0192922		-0.0124023	0.0040734	0.00232912	-0.00528126	0.00374953	0.158979	KLHL3	PKD2L2, HNRNPA0, KLHL3, KDM3B
12	q13.13	rs61932870	51002156:52002156	CED	0.000176895	-0.0262063	0.00698834	7.8348e-07	-0.0320239	0.00648308	0.228009		0.0105201	-0.0459761	0.0179703	0.470149	-0.0112111	0.0155226	0.0321695		-0.0288033	0.00651318	9.76486e-06	-0.0289326	0.00598228	1.32219e-06	TFCP2	BIN2, DAZAP2, CERS5, METTL7A
2	q31.2	rs59532220	179149461:180149461	CED	0.000182191	0.0244115	0.00652261	4.40552e-08	0.0329806	0.00602496	0.066196		5.15267e-05	0.0666781	0.0164664	0.17334	0.019619	0.014409	0.00702592		0.030144	0.00606418	6.6667e-07	0.0309921	0.00555859	2.46771e-08	TTN	CCDC141
1	p34.2	rs2782652	43426305:44426305	CED	0.000188237	0.0133277	0.0035689	3.22373e-10	0.0208238	0.0033117	0.0297625		0.0139056	-0.0222089	0.00902844	0.458524	0.00574992	0.00775666	0.00937746		0.00852523	0.003319	0.0102105	0.0184997	0.00304572	1.24762e-09	HYI-AS1, PTPRF	MPL, ST3GAL3, TIE1, ELOVL1, SZT2, HYI, CDC20, MED8
3	p14.3	rs11926924	57299360:58299360	CED	0.000189768	0.0134868	0.0036135	2.38874e-10	0.0212411	0.00335332	0.00999893		0.00240299	-0.0315917	0.010407	0.639449	-0.00422207	0.00901239	0.0195866		0.00863683	0.00341358	0.0114018	0.0181446	0.00314282	7.77104e-09	SLMAP	FLNB, DENND6A, SLMAP, ARF4
7	p12.3	rs10260816	45510100:46510100	CED	0.000196322	0.0133426	0.00358307	1.74426e-11	0.0223313	0.00331995	0.0246664	SSE_Female	0.333811	-0.00877135	0.00907551	6.20328e-05	0.0314001	0.00783928	0.000274636		0.0103605	0.00333273	0.00187909	0.0237105	0.0030571	8.77388e-15	AC073115.6	IGFBP3
11	p15.5	rs4980379	1388614:2388614	CED	0.000225207	0.0135465	0.00367213	8.40934e-10	0.0208971	0.00340492	0.0138847		0.60097	0.00619655	0.0118478	0.00212353	0.031413	0.0102234	0.000895203		0.0129023	0.00350752	0.000234634	0.0219471	0.00323046	1.09226e-11	LSP1	LSP1, MRPL23, TNNI2, TNNT3, MRPL23-AS1
4	q21.21	rs56190605	80662062:81662062	CED	0.000249427	-0.0215454	0.005882	2.42927e-05	-0.0230741	0.00546601	0.127523		0.024202	-0.0282512	0.0125335	0.00743021	-0.0289216	0.0108034	0.0087602		-0.0227557	0.00532478	1.92379e-05	-0.0242659	0.00487728	6.51484e-07	PRDM8, FGF5	PRDM8
16	p12.3	rs77924615	19892332:20892332	CED	0.000249616	-0.01649	0.00450209	2.69115e-11	-0.0277455	0.00416414	0.0374849		0.00145241	-0.0364444	0.0114446	0.0857925	-0.0169821	0.00988439	0.0150754		-0.0191641	0.00418958	4.77972e-06	-0.0261231	0.0038375	9.94248e-12	PDILT
2	q24.3	rs268263	164454174:165454174	CED	0.000273334	0.0129724	0.00356439	6.88932e-12	0.0227518	0.00331641	0.00925933	CED	0.00251275	-0.0305563	0.0101108	4.55008e-06	-0.0403034	0.00878965	0.0492846		0.00816067	0.00336162	0.0151989	0.0148938	0.00310289	1.58677e-06	AC092684.1
8	q22.1	rs28419772	95521436:96521436	CED	0.000286738	0.0186753	0.00514885	4.29806e-09	0.0279824	0.00476492	0.0771341		0.00807409	-0.0718415	0.0271183	0.904502	0.00278315	0.0231972	0.00296816		0.0155258	0.00505848	0.00214591	0.0269622	0.00466747	7.62149e-09	NDUFAF6	NDUFAF6, TP53INP1
1	p31.1	rs10782749	81161747:82161747	AED	0.000297409	-0.014377	0.00397417	0.284357	0.00394531	0.00368519	0.000723276		0.686927	-0.00546751	0.0135659	0.107934	0.0188382	0.0117183	0.0563945		-0.0136728	0.00381388	0.000337064	0.00528564	0.00351545	0.132698	RPL7P10, RP3-445O10.1
11	q22.3	rs4754196	106596777:107596777	CED	0.00029976	-0.0143262	0.00396234	2.3856e-06	-0.0174093	0.0036901	0.0173184		0.0107409	-0.0311802	0.0122217	0.667262	-0.00458121	0.0106561	0.0315556		-0.0159292	0.0037692	2.3772e-05	-0.0160357	0.00348695	4.24964e-06	RP11-382M14.1, RP11-819C21.1	ALKBH8, AP003057.1, CWF19L2, AP000766.1
6	p22.2	rs1321250	25142244:26142244	CED	0.000300022	0.016317	0.00451324	6.83162e-11	0.0273097	0.00418559	0.0180646		0.233688	-0.0109743	0.00921482	0.0025304	-0.0240116	0.00795109	0.0104178		0.0110369	0.0040532	0.00646921	0.0161737	0.00370375	1.26048e-05	LRRC16A, SCGN	BTN3A2, HIST1H2BD
6	p22.2	rs1155207	25828365:26828365	CED	0.000307794	-0.012856	0.00356246	1.0634e-07	-0.0175705	0.00330535	0.12955		0.253026	-0.0159798	0.0139799	5.41605e-05	-0.0486289	0.0120444	0.0377353		-0.0130465	0.00345214	0.000157303	-0.0197457	0.0031875	5.83795e-10	HIST1H3PS1, RNU6-1259P	BTN3A2, HIST1H4H, HIST1H3E, BTN3A1, HIST1H2BK, HIST1H4E, HIST1H2AE, BTN2A1, HIST1H4C, HIST1H2BD, B4GAT1, SLC17A3
10	p12.31	rs12258967	18227959:19227959	CED	0.000315827	-0.0128479	0.00356683	2.08538e-12	-0.0232572	0.00330868	0.00394907		0.0460791	-0.019587	0.00981916	0.00440945	-0.0242718	0.00852394	0.0389545		-0.0136335	0.0033525	4.76909e-05	-0.0233901	0.00308446	3.37159e-14	CACNB2	NSUN6
18	q12.3	rs7236548	42597750:43597750	AED	0.000329059	0.0215702	0.00600615	0.0166272	0.0133727	0.00558387	0.010439		0.863471	-0.00159033	0.00924826	0.0836912	0.0138952	0.00803324	0.0812591		0.0146996	0.00503712	0.00351986	0.0135429	0.00458502	0.00313961	RP11-749H17.2
8	p23.1	rs10090444	10245469:11245469	SSE	0.000361231	-0.0127146	0.00356452	2.85301e-13	-0.0241589	0.00330867	3.09607e-06	CED	8.15198e-07	-0.0458006	0.0092844	0.0502175	-0.0157273	0.00803157	3.77975e-05		-0.0169649	0.0033277	3.43073e-07	-0.0229356	0.00305925	6.52274e-14	RP11-177H2.2, XKR6	TDH, FAM86B3P, NEIL2, FDFT1, XKR6, AC087203.2, AF131215.5, RP11-148O21.3, CTSB, AC022239.1, CLDN23, PINX1, AF131215.2, PRAG1, BLK, SLC35G5, SOX7, RP1L1, AF131215.6, FAM66A, FAM86B1, FAM167A, MSRA
7	q36.1	rs73728279	150911494:151911494	AED	0.000391754	0.0139737	0.00394107	4.57713e-06	0.0167777	0.00366052	0.00378094		0.000835397	0.0338291	0.0101248	0.208543	0.0109355	0.0086955	0.0132798		0.0165862	0.00367265	6.29726e-06	0.0158982	0.00337377	2.44926e-06	PRKAG2	PRKAG2
7	p14.2	rs343003	34979439:35979439	CED	0.000403359	-0.0148253	0.00419038	1.80456e-10	-0.0248409	0.0038951	0.0542401	CED	0.0533338	0.0186831	0.0096688	0.00118387	0.0270223	0.00833243	0.0757396		-0.00952669	0.00384482	0.0132196	-0.0155401	0.0035286	1.0625e-05	AC009531.2, AC007652.1	DPY19L1
17	q25.3	rs1436138	74816880:75816880	CED	0.000403476	-0.0131518	0.00371742	5.53201e-07	-0.017221	0.00343934	0.00795049		0.0223724	-0.0234576	0.0102698	0.808519	-0.00215414	0.00888894	0.0224836		-0.0143457	0.00349547	4.05915e-05	-0.0152591	0.00320761	1.96345e-06	SEPT9	SEPT9
20	q13.2	rs6021247	49608980:50608980	CED	0.000417932	0.0129725	0.00367643	0.122426	0.00526517	0.00340859	0.124212		0.108673	0.0155239	0.00967675	0.00634982	0.0229186	0.00839714	0.0160621		0.0132943	0.00343675	0.000109606	0.00776249	0.00315831	0.013979	NFATC2	NFATC2
18	q21.2	rs11876341	48299991:49299991	AED	0.000459195	0.0135076	0.00385537	0.388757	0.0030828	0.00357685	0.0474508		0.82729	0.00215779	0.00988986	0.00239963	0.0261154	0.00860202	0.00471111		0.0120103	0.00359208	0.000827109	0.00647813	0.00330271	0.0498253	MEX3C, RNU1-46P	ME2
16	q23.3	rs7500448	82545790:83545790	CED	0.000461558	0.0143827	0.00410676	4.05989e-12	0.0264528	0.00381409	0.0215262		0.895066	0.00130845	0.00992015	0.000117151	-0.0332429	0.00862891	0.00429572		0.0124699	0.00379446	0.00101503	0.016696	0.0034885	1.70136e-06	CDH13	CDH13
7	q11.23	rs587650617	73739332:74739332	CED	0.000485767	0.0156559	0.00448778	0.00474887	0.011732	0.00415492	0.12975		0.0207558	0.0262901	0.0113684	0.319143	0.00986484	0.00990212	0.00562194		0.0170897	0.0041743	4.23966e-05	0.0114525	0.00383131	0.00279727	GTF2IRD2
14	q11.2	rs440466	23374117:24374117	CED	0.00048736	0.012898	0.00369816	0.0279648	0.00754483	0.00343291	0.125547		0.023639	0.0358115	0.0158241	0.553156	-0.00791362	0.0133441	0.0172254		0.0140847	0.00360112	9.18439e-05	0.00658525	0.00332465	0.0476213	MYH6
6	p22.1	rs9393897	27627710:28627710	CED	0.000491074	-0.0144161	0.00413583	1.19037e-12	-0.0272923	0.00384021	0.00309555	CED	0.0222474	-0.0240969	0.0105398	2.40961e-07	-0.0472344	0.00914384	0.00773168		-0.0157078	0.00385003	4.50495e-05	-0.0302823	0.00354063	1.20137e-17	ZKSCAN8, ZNF192P1	ZSCAN12P1, IER3, BTN3A2, FBRSL1, PGBD1, ZKSCAN4, ZNF389, ZSCAN23, ZNF192P1, ZSCAN9, ZKSCAN8, ZSCAN31, ZNF602P, ZNF603P, ZSCAN16, GUSBP2, ZNF165
10	q21.3	rs11527181	64046164:65046164	CED	0.000525806	-0.0124445	0.00358907	4.16903e-15	-0.0261518	0.00333126	0.00231633	CED	0.209663	-0.0113098	0.00901521	0.00136827	-0.0249409	0.00779029	0.0723524		-0.0122893	0.00333453	0.000228298	-0.0259646	0.00306297	2.31189e-17	ALDH7A1P4, RP11-436D10.3	EGR2, ADO
11	p15.4	rs10840457	10175738:11175738	CED	0.000528892	-0.0132553	0.00382466	7.6454e-12	-0.0242331	0.00354001	0.00724758		0.00308565	0.0329991	0.0111506	0.095751	0.0158867	0.00953665	0.0134111		-0.00838633	0.00361776	0.0204439	-0.0193745	0.00331874	5.28642e-09	MRVI1	AMPD3, RNF141, MRVI1
5	q33.3	rs7701003	157324481:158324481	CED	0.000602463	-0.0122904	0.00358261	1.96231e-07	-0.0173109	0.00332706	0.0348799		0.501369	0.00625046	0.00929648	1.61796e-05	-0.0349165	0.00809632	2.24848e-05		-0.00989291	0.00334296	0.00308315	-0.0198544	0.00307736	1.10553e-10	CTC-436K13.2, RP11-542A14.1
6	p22.2	rs2032451	25592170:26592170	SSE	0.000636	0.0186516	0.00546032	7.49182e-13	0.0362563	0.0050562	0.00172476	CED	0.0171756	0.0356421	0.0149562	3.51425e-06	0.0607941	0.0131049	0.0101058		0.0206499	0.00512918	5.67421e-05	0.0394357	0.00471727	6.27888e-17	HFE	BTN3A2, TRIM38, HIST1H3E, HIST1H3G, HIST1H2AE, HIST1H3F
5	q35.2	rs72812818	172856752:173856752	SSE	0.000636989	-0.0132036	0.00386586	1.071e-18	-0.0316356	0.0035834	0.000281849	CED	0.12729	-0.0148721	0.00975265	0.000526716	-0.0291817	0.00841665	0.0318061		-0.0134302	0.00359382	0.000186214	-0.0312591	0.00329702	2.51865e-21	CPEB4	C5orf47, CPEB4, NSG2
2	p22.2	rs13419498	37059743:38059743	CED	0.000654791	-0.0143945	0.00422385	0.00141162	-0.0125269	0.00392407	0.258942		0.366747	-0.010255	0.0113616	0.00325053	-0.0289184	0.00982544	0.0486329		-0.0138919	0.00395911	0.000450076	-0.0147817	0.00364419	4.98666e-05	RNU6-939P, QPCT	EIF2AK2, NDUFAF7, PRKD3, QPCT, CEBPZ
17	q21.31	rs71373532	42653235:43653235	CED	0.000722298	0.0132068	0.00390614	0.000915803	0.0120517	0.00363524	0.029864		0.00104783	0.0394172	0.0120256	0.900181	0.0013058	0.0104103	0.00828543		0.0157083	0.00371507	2.35511e-05	0.0108838	0.00343201	0.00151782	NMT1	EFTUD2, DCAKD, HEXIM2, ACBD4, NMT1
9	p13.3	rs76452347	35406471:36406471	CED	0.000739919	0.0120598	0.00357389	0.00206277	0.0102372	0.00332258	0.148346		0.104857	0.0146332	0.00902275	0.566187	0.00449479	0.00783499	0.0927505		0.0124088	0.00332273	0.000188072	0.00936192	0.0030589	0.00220928	HRCT1	HRCT1, GBA2, FAM221B, TPM2
4	q23	rs1229984	99739319:100739319	AED	0.000741347	0.0176888	0.00524286	0.162188	0.00681727	0.0048773	0.024235		0.991202	-0.000564516	0.0511948	0.0128117	-0.10377	0.0416899	0.00847889		0.0174993	0.00521558	0.000793059	0.00532414	0.00484426	0.271742	ADH1B
10	q24.31	rs10883543	102052752:103052752	CED	0.000771956	0.0190596	0.00566789	1.94531e-06	0.025013	0.00525573	0.0334532		0.307832	-0.0158674	0.0155593	0.000339966	-0.049406	0.0137884	0.0533471		0.0149678	0.00532555	0.00494535	0.0155723	0.00491106	0.00151991	PAX2	PAX2, SEC31B
3	p21.31	rs36022378	49413705:50413705	CED	0.000832928	0.0147175	0.00440423	3.04163e-11	0.0272407	0.00409945	0.0041771	CED	0.00892159	-0.0235742	0.00901406	2.09743e-06	-0.0369662	0.0077911	0.0132677		0.00733797	0.00395715	0.0636879	0.013319	0.00362789	0.000241353	ACTBP13	APEH, HYAL3, WDR6, AMT, USP19, UBA7, DALRD3, QRICH1, P4HTM, NICN1, CDHR4, MAPKAPK3, RBM6, INKA1
1	p13.2	rs57748895	115326169:116326169	CED	0.000904593	0.036845	0.0111022	1.48338e-07	0.0540302	0.010282	0.0751551		0.49225	0.0192684	0.0280575	0.00881094	0.0645638	0.0246477	0.112593		0.0344655	0.0103234	0.00084206	0.0555916	0.00948942	4.67719e-09	RP4-663N10.1
15	q25.1	rs2062316	80510249:81510249	CED	0.000967068	0.0117724	0.00356739	1.27252e-09	0.0201182	0.00331374	0.00649922		0.457837	-0.00982686	0.0132362	0.00269009	-0.0340729	0.0113526	0.0821997		0.0103097	0.00344448	0.00276156	0.0158635	0.003181	6.13323e-07	ABHD17C	ARNT2, ABHD17C
3	p25.1	rs13062241	14423230:15423230	CED	0.000995784	-0.0132018	0.00401054	1.60576e-07	-0.0194727	0.00371602	0.0325006		0.00190046	0.0312725	0.0100693	0.120371	0.0136044	0.00875862	0.0155676		-0.00711248	0.00372588	0.0562698	-0.0144269	0.00342087	2.47213e-05	FGD5	FGD5
11	p11.2	rs3837374	47328404:48328404	AED	0.00109036	0.0127047	0.0038898	6.13956e-05	0.0144964	0.00361735	0.14088		0.120476	-0.0145137	0.00934657	0.0311852	-0.0175244	0.00813274	0.00925121		0.00868642	0.00359121	0.0155719	0.00920779	0.00330515	0.00533814	NUP160	NUP160, MYBPC3, C1QTNF4, NR1H3, OR4X1, MTCH2, FNBP4, PSMC3, SPI1, PTPMT1, CELF1
17	q21.33	rs17637472	46961433:47961433	CED	0.00119907	0.0118082	0.00364545	3.14285e-09	0.0200357	0.00338198	0.00783292		0.00187323	0.0284303	0.00914162	0.0327994	0.0168101	0.00787496	0.023334		0.0140888	0.00338614	3.17242e-05	0.0195334	0.00310753	3.26093e-10	RP11-81K2.1	GNGT2, PHOSPHO1
4	p15.2	rs28667801	26285356:27285356	CED	0.00119907	0.0117718	0.00363421	1.20796e-06	0.0163347	0.00336487	0.0286481		0.00637708	-0.0296578	0.0108717	0.395613	-0.00805113	0.00947757	0.0475684		0.00760761	0.00344673	0.0273005	0.013605	0.00317095	1.78274e-05	TBC1D19, STIM2
8	q21.13	rs143348642	80886171:81886171	CED	0.00127105	-0.0143149	0.00444219	6.76196e-06	-0.0185613	0.00412365	0.0193496		0.0167634	-0.320579	0.13402	0.308288	0.114896	0.112772	0.006455		-0.014651	0.00443975	0.000966985	-0.0183831	0.0041209	8.15987e-06	RNU6-1213P, Y_RNA
1	q32.1	rs2820321	201380296:202380296	AED	0.00147562	0.0118045	0.00371269	3.53263e-09	0.0203161	0.00344049	0.0346762		0.856591	0.00166484	0.00921245	0.048062	-0.0157908	0.00798765	0.0168912		0.0103878	0.00344356	0.00255649	0.0146657	0.00315984	3.46275e-06	LMOD1	SHISA4, LMOD1, RNPEP, IPO9, AL513217.1
11	q21	rs2186739	94827374:95827374	CED	0.00149194	0.0141605	0.00445817	4.51228e-10	0.0257343	0.00412705	0.0561368	AED	0.373582	-0.0099763	0.0112118	0.000189837	-0.0361573	0.00968689	0.00561283		0.0108652	0.00414268	0.00872229	0.016226	0.00379682	1.92367e-05	RP11-338H14.1, RP11-644L4.1	SESN3
17	q25.3	rs7221314	76258251:77258251	CED	0.0015583	-0.0115579	0.00365334	1.75606e-06	-0.0161933	0.00338787	0.0847098		0.744967	0.00291605	0.00896453	0.013063	0.0193013	0.00777593	0.0184066		-0.0094964	0.00338318	0.00500139	-0.0105305	0.00310589	0.000697632	CYTH1	CYTH1, TIMP2, USP36
2	q13	rs11692391	113195120:114195120	AED	0.00168273	0.011325	0.00360527	0.758904	0.00102526	0.00334048	0.0191428		0.445165	-0.00739452	0.00968485	0.0303765	-0.0182275	0.00841824	0.0989631		0.00904664	0.00337875	0.00741722	-0.0015939	0.00310496	0.607714	AC079753.5, IL36G	POLR1B, MERTK, PAX8, IL37, SLC20A1
7	p21.1	rs57301765	18552733:19552733	CED	0.00182869	-0.0155885	0.00500146	4.48302e-05	-0.0188932	0.00462937	0.0660421		0.61955	-0.00623625	0.0125606	0.00341608	-0.031988	0.0109256	0.0236162		-0.0143086	0.00464664	0.00207456	-0.0208864	0.00426252	9.58347e-07	HDAC9, TWIST1
8	p23.1	rs7838131	11096163:12096163	SSE	0.00189155	-0.0111702	0.0035954	8.7886e-15	-0.0258598	0.00333403	0.000122193		9.74902e-07	0.0449354	0.0091743	0.32719	0.00780642	0.00796731	0.000497926		-0.00370046	0.00334751	0.26897	-0.020843	0.0030756	1.22804e-11	GATA4	FAM86B3P, AF131215.6, FAM66D, FDFT1, NEIL2, CTSB, AC145124.1, GATA4, FAM66A, AF131216.3, AF131215.2, PRAG1, FAM167A, AC130352.1, BLK, MSRA
4	q32.1	rs922888	155987119:156987119	CED	0.00203095	-0.0175805	0.00569737	7.43969e-08	-0.0284187	0.00528187	0.036545		0.0672902	0.0179083	0.00978691	0.0197172	0.0196782	0.00843904	0.0368942		-0.00859785	0.00492382	0.0807805	-0.0148808	0.00447723	0.000888436	RP13-487K5.1, GUCY1A3
10	p12.31	rs7923191	18227901:19227901	CED	0.00217056	0.0124454	0.0040593	5.75437e-09	0.0219476	0.00376847	0.0302947		0.0130548	0.0280757	0.0113096	0.475106	0.00703638	0.00985205	0.00970615		0.0142292	0.00382065	0.000195867	0.0200444	0.00351977	1.23512e-08	CACNB2
20	q13.33	rs6011210	62029923:63029923	CED	0.00218867	0.0119556	0.0039027	6.91495e-08	0.0195703	0.00362844	0.0119937		0.0347715	0.0350584	0.0166064	0.014629	0.0350971	0.0143748	0.174766		0.0131648	0.00379919	0.000529926	0.0205003	0.00351809	5.63954e-09	DNAJC5	UCKL1, DNAJC5, TPD52L2
11	p11.2	rs10501320	46793799:47793799	CED	0.00230173	0.0120967	0.00396832	7.62471e-07	0.0181535	0.00367115	0.029688		0.0329674	0.0310067	0.0145393	3.92082e-05	0.0523669	0.0127331	0.0464327		0.0134077	0.00382829	0.000461295	0.0207792	0.00352746	3.84554e-09	MADD	ARHGAP1, ACP2, NUP160, MYBPC3, C1QTNF4, NR1H3, MADD, MTCH2, RTN1, PSMC3, GPER1, SPI1, AC090559.1, FNBP4
21	q22.2	rs117870289	39483448:40483448	SSE	0.00262012	-0.0434178	0.0144285	4.40757e-10	-0.0833331	0.0133564	0.00695848		0.00588615	-0.10321	0.0374722	0.522283	-0.0198155	0.0309697	0.031746		-0.051138	0.0134648	0.000145932	-0.0733718	0.0122644	2.1976e-09	ERG
11	p15.1	rs7110527	15772201:16772201	CED	0.00280719	-0.013072	0.00437462	5.74667e-07	-0.0202968	0.00405959	0.101295		0.190065	0.0130607	0.00996673	0.000256863	0.0314486	0.00860256	0.00256608		-0.00885071	0.00400575	0.0271397	-0.0108722	0.00367133	0.00306263	SOX6
10	q25.3	rs4918889	115330718:116330718	CED	0.00298424	-0.0139365	0.00469337	4.76236e-08	-0.0238268	0.00436373	0.0527925	SSE_Female	0.660456	0.00536476	0.0122124	2.99573e-05	-0.0442789	0.0106073	0.000788527		-0.0114526	0.00438098	0.00894438	-0.0267871	0.00403558	3.18526e-11	ADRB1, RNU6-709P	VWA2, NHLRC2, ADRB1, DCLRE1A
5	p13.3	rs62369525	32219811:33219811	CED	0.00303626	-0.0120508	0.0040656	3.21313e-07	-0.019325	0.00378129	0.0112435		0.27501	0.0114147	0.0104566	0.0502605	0.017657	0.0090187	0.162261		-0.00896933	0.00378926	0.0179311	-0.0137959	0.00348719	7.61598e-05	NPR3
5	q15	rs4869313	95723880:96723880	CED	0.003439	-0.0104478	0.00357122	7.62346e-08	-0.0178111	0.00331304	0.0317005		0.296292	-0.0129536	0.0124024	0.0253718	0.0240462	0.010755	0.00743602		-0.0106397	0.00343178	0.00193306	-0.0141834	0.00316622	7.47831e-06	ERAP2	CAST, ERAP1, ERAP2, LNPEP
11	q13.3	rs72930288	68565991:69565991	CED	0.00389142	-0.0165174	0.00572156	4.54593e-07	-0.0267708	0.00530669	0.0332877		0.016738	-0.0263988	0.0110336	0.295625	-0.00992304	0.00948774	0.00869341		-0.0186114	0.00507926	0.00024811	-0.0227561	0.00463146	8.95208e-07	MYEOV
3	p21.1	rs11714712	53350855:54350855	CED	0.00390817	0.0107079	0.00371091	0.146911	0.00498613	0.00343744	0.127304		0.452881	0.00989531	0.0131826	0.00463586	-0.0319531	0.0112849	0.00794174		0.0106482	0.00357208	0.00287342	0.00184975	0.00328827	0.573755	CHDH	PIANP
11	p15.5	rs907613	1374292:2374292	CED	0.0042986	0.0109129	0.00382183	2.90165e-07	0.0181498	0.00353803	0.132769		0.280906	0.0105024	0.0097397	0.00511154	0.0234036	0.00835811	0.131851		0.0108581	0.00355773	0.00227336	0.0189482	0.00325814	6.04055e-09	LSP1	LSP1, MRPL23, TNNI2, CTSD, TNNT3, PRR33
7	p22.3	rs73033340	695692:1695692	SSE	0.00430823	-0.0290385	0.0101721	2.03671e-08	-0.0525234	0.00936395	0.00131146		0.00114406	-0.0775661	0.0238452	0.547783	-0.0124742	0.0207526	0.0197402		-0.0365098	0.00935634	9.53417e-05	-0.0457488	0.00853529	8.32433e-08	ZFAND2A	ZFAND2A
19	p13.3	rs8101970	1335625:2335625	CED	0.00457549	-0.0126215	0.00445118	2.61044e-06	-0.0193397	0.00411531	0.0241252		0.12336	0.0159889	0.0103765	0.0132966	0.0222465	0.00898534	0.00465218		-0.00817502	0.00409069	0.0456685	-0.0121289	0.00374155	0.0011883	REXO1	REXO1, KLF16, SCAMP4, ATP8B3
3	p21.1	rs3821843	53058012:54058012	CED	0.00462957	-0.0114749	0.00405219	8.47579e-05	-0.0148	0.0037653	0.116524		0.347787	0.0101033	0.0107606	0.178613	0.0124487	0.00925505	0.00831454		-0.00879494	0.00379221	0.0203837	-0.0109304	0.00348771	0.00172459	CACNA1D	TKT
3	p21.31	rs143311886	49121367:50121367	CED	0.00472013	-0.0108888	0.00385367	7.69449e-08	-0.0191942	0.00357144	0.0823054		0.176962	-0.0129189	0.00956807	6.60661e-06	-0.0373277	0.00828265	0.0257649		-0.0111722	0.00357463	0.0017756	-0.0220372	0.00327955	1.82257e-11	BSN	APEH, WDR53, HYAL3, WDR6, DALRD3, AMT, USP19, IP6K2, UBA7, GPX1, GMPPB, P4HTM, KLHDC8B, DCUN1D1, NICN1, LAMB2, CRBN, RBM6
8	p23.1	rs907183	8229761:9229761	SSE	0.00504628	0.0100174	0.00357242	4.92637e-15	0.0259217	0.00331079	0.000135789		5.58718e-07	0.0485661	0.00970083	0.02327	0.0190722	0.00840526	0.00159757		0.0146209	0.00335233	1.2923e-05	0.0250017	0.00308043	4.80619e-16	MFHAS1	TDH, FAM86B3P, NEIL2, FDFT1, XKR6, FAM85B, RPL10P19, CLDN23, PRAG1, BLK, FAM66D, MFHAS1, AC103957.2, RP1L1, ALG1L13P, FAM66A, FAM167A, ERI1, MSRA
3	p21.31	rs6442105	47682326:48682326	SSE	0.00532891	0.0104863	0.00376326	6.08156e-11	0.0229005	0.00350047	0.00683098		0.00665391	-0.0262772	0.00968233	0.146489	-0.0122302	0.0084225	0.0116622		0.00566144	0.00350763	0.10652	0.0177261	0.00323242	4.16144e-08	RP11-1029M24.1, CDC25A	MAP4, MRPS18AP1, SPINK8, ZNF589, WDR6, QRICH1, NME6, CDC25A, TREX1, NCKIPSD, CSPG5, FCF1P2, SHISA5, DHX30
7	q32.3	rs12154627	129922934:130922934	CED	0.00538936	0.0135454	0.00486749	0.206626	0.00569087	0.00450618	0.236358		0.578899	-0.00555091	0.0100016	0.0380005	0.017902	0.00862772	0.0379022		0.00988858	0.0043767	0.0238605	0.008308	0.00399421	0.0375244	KLF14, RP11-36B6.1	COPG2
5	q31.1	rs17622656	131320997:132320997	CED	0.0053966	-0.00988404	0.00355235	0.000253151	-0.0120702	0.00329866	0.129929		0.976713	0.000261963	0.0089743	0.00360758	0.0227883	0.00782891	0.0292787		-0.00850965	0.003303	0.00998515	-0.00681476	0.00303985	0.0249736	IRF1	SLC22A5, MIR3936HG, PDLIM4, SLC22A4, IRF1, RAD50, AC116366.1, SHROOM1, P4HA2
5	q14.3	rs34712971	86801956:87801956	CED	0.00559972	-0.0131243	0.00473736	1.15172e-05	-0.0192512	0.00438858	0.134637		6.7913e-05	-0.0453804	0.0113901	0.0501059	-0.0193939	0.00989925	0.042533		-0.0178813	0.00437411	4.35119e-05	-0.0192746	0.004012	1.55336e-06	CTD-2316B1.2, TMEM161B	MEF2C
1	p13.2	rs10158127	112932444:113932444	SSE	0.00561857	0.0099359	0.00358789	4.31421e-11	0.0219132	0.00332357	0.00436538		0.637059	0.00441789	0.00936349	0.000470792	0.0282601	0.00808078	0.00516613		0.00922944	0.00335035	0.00587338	0.0228315	0.00307374	1.10319e-13	RP3-522D1.1, RP3-522D1.2	SLC16A1, AL357055.3
3	q25.32	rs699920	157447175:158447175	CED	0.00567644	0.0103058	0.00372595	4.81309e-09	0.0202122	0.00345283	0.0160927		0.000231058	-0.0467631	0.0126971	0.601389	0.00573445	0.0109769	0.000877666		0.0057811	0.00357519	0.105878	0.0189087	0.00329373	9.4219e-09	RSRC1
6	p12.1	rs10081146	55576740:56576740	AED	0.00619405	-0.0140057	0.0051165	0.000669885	-0.0161208	0.00473906	0.000189867		0.415689	-0.0103457	0.0127106	0.00165378	-0.0345524	0.0109812	0.00662738		-0.0134953	0.00474639	0.00446507	-0.0190146	0.00435116	1.24238e-05	COL21A1	COL21A1
17	q21.31	rs62071370	43944802:44944802	CED	0.00690257	-0.0103779	0.00384147	0.000120813	-0.0137239	0.0035697	0.0160132		0.0148322	-0.0265203	0.010884	0.227309	-0.0113729	0.00941981	0.00359013		-0.012166	0.00362246	0.000783677	-0.0134287	0.00333805	5.74841e-05	ARL17B, NSFP1	ARL17A
1	q42.2	rs2478539	230344772:231344772	SSE	0.00701389	0.00975362	0.00361752	3.22657e-11	0.0222741	0.00335643	0.00405526		0.274815	-0.0190781	0.0174697	0.00344112	0.0439503	0.015023	0.00311422		0.00856816	0.00354237	0.0155733	0.0233047	0.00327567	1.12346e-12	AGT	AGT, COG2
20	q13.33	rs4809361	61947662:62947662	CED	0.00701755	-0.0103291	0.00383121	0.170198	-0.0048651	0.0035471	0.215264		0.620628	-0.00534789	0.0108045	0.268904	0.0102129	0.00923731	0.136829		-0.00977273	0.00361092	0.00680087	-0.0029275	0.00331136	0.376654	RP4-583P15.11	RIN1
21	q22.2	rs762384	39574396:40574396	CED	0.00705015	0.0112821	0.0041871	5.18642e-12	0.0268157	0.00388586	0.00654264		0.0137757	-0.0221217	0.00898071	0.451906	-0.00586873	0.00780157	0.00831454		0.00531755	0.00379491	0.161145	0.0203188	0.00347828	5.16914e-09	ERG, LINC00114	ERG
11	q24.1	rs7129204	122027212:123027212	CED	0.00719275	0.0146618	0.00545491	7.78333e-12	0.0346406	0.00506224	0.00667908		0.0633349	-0.0555776	0.02993	0.218392	-0.0328699	0.0267052	0.016035		0.0124037	0.00536651	0.0208158	0.0322989	0.00497367	8.36e-11	UBASH3B	MIR100HG, UBASH3B
1	p36.22	rs60259384	8939983:9939983	AED	0.00852534	-0.0100842	0.00383347	0.267654	0.00394094	0.00355525	0.00290737		0.694808	0.00471065	0.0120064	0.0389099	0.0214845	0.010403	0.0200711		-0.00871549	0.00365185	0.017005	0.00577565	0.00336421	0.0860174	SPSB1, RNA5SP40
19	p13.11	rs10421727	16725128:17725128	CED	0.008712	0.010701	0.00407938	1.06761e-07	0.0201698	0.00379485	0.00482352		0.638057	0.00468042	0.00994938	0.0434899	0.017414	0.00862482	0.0541286		0.00983454	0.00377444	0.00917231	0.0197228	0.00347349	1.36203e-08	MYO9B	NR2F6, CPAMD8, HAUS8, OCEL1, MYO9B
1	p13.2	rs146401699	112629988:113629988	CED	0.00900645	-0.0196259	0.00751421	4.89868e-05	-0.0284157	0.00699806	0.118607		0.0677269	0.0945174	0.0517363	0.467753	-0.0321472	0.0442708	0.0314292		-0.0172678	0.00743619	0.0202258	-0.0285067	0.00691223	3.72205e-05	ST7L	CAPZA1, RHOC, ST7L
6	p22.1	rs4289643	28159035:29159035	AED	0.00901897	0.00935408	0.00358206	2.97602e-08	0.0184092	0.00332112	0.0546908	AED	0.0768095	-0.0208742	0.0117961	1.16337e-05	-0.0445132	0.0101512	0.00200927		0.00680199	0.00342751	0.0471971	0.0123254	0.00315648	9.43121e-05	LINC00533, RPSAP2	ZNF192P2, ZSCAN12P1, BTN3A2, OR2B8P, ZBED9, PGBD1, ZNF311, ZNF192P1, TRIM27, ZSCAN31, ZSCAN26, ZSCAN9, ZKSCAN3, ZNF603P, ZFP57, OR2J3, ZSCAN23
8	q11.21	rs2219210	51409244:52409244	CED	0.0090804	0.0121415	0.00465363	0.000191327	0.0160426	0.00430065	0.0383385		0.113189	0.0200482	0.0126561	0.00289303	0.0327022	0.0109772	0.0373763		0.0130832	0.00436772	0.00274064	0.0182594	0.0040043	5.11642e-06	RP11-139G7.1, SNORA7
5	q14.3	rs17420814	87318045:88318045	CED	0.00920214	-0.0121994	0.00468402	3.39805e-05	-0.017967	0.00433451	0.0575717		0.0106197	-0.0304248	0.0119071	0.00194257	-0.0320196	0.0103318	0.102379		-0.0146418	0.00435888	0.000782051	-0.0200702	0.00399701	5.13237e-07	LINC00461	MEF2C, TMEM161B, TMEM161B-AS1
10	q26.3	rs56092448	133922824:134922824	AED	0.00997875	0.0144105	0.00559285	1.27007e-05	0.0225649	0.00516913	0.00738722		0.0428418	-0.043701	0.0215769	0.751721	-0.00586666	0.0185435	0.059639		0.0107519	0.00541393	0.0470359	0.0205149	0.00497929	3.78795e-05	INPP5A	INPP5A
6	p21.1	rs9394951	42850753:43850753	CED	0.0101894	-0.00911078	0.00354593	0.645362	-0.00151215	0.00328574	0.115987		0.495634	0.00676098	0.00992238	0.000619059	0.0293556	0.00857483	0.0330611		-0.00731333	0.00333911	0.0285096	0.00243989	0.0030682	0.426486	ZNF318, ABCC10	SLC22A7, CRIP3, PEX6, DNPH1, MAD2L1BP, PTK7
4	q12	rs60991988	54301228:55301228	CED	0.0105493	0.0150248	0.00587524	1.05814e-10	0.034896	0.00540288	0.0109865		0.806635	0.00509344	0.0208089	0.0635245	0.0337516	0.0181894	0.0955416		0.0142916	0.00565419	0.0114844	0.0348032	0.00517923	1.82014e-11	FIP1L1
2	q35	rs1250258	215800185:216800185	AED	0.0111889	0.00953229	0.00375764	0.695137	-0.00136511	0.00348336	0.0221814		0.0438544	0.0460298	0.0228369	0.0329985	-0.0429877	0.0201612	0.00173814		0.0104944	0.00370778	0.00464947	-0.00257159	0.0034325	0.453745	FN1	ATIC, FN1
6	p21.33	rs1077394	31110384:32110384	AED	0.0124494	0.0124605	0.00498585	8.71205e-05	0.0181895	0.00463545	0.0209755		0.116041	-0.0141201	0.00898417	0.000125747	-0.0299601	0.00781206	0.0376464		0.00620177	0.00435952	0.154858	0.00565116	0.00398648	0.156313	BAG6	C6orf48, DDR1, ATF6B, HLA-DQA1, RNF5, CCHCR1, ATP6V1G2, HLA-DRB5, HSPA1B, HCG27, GPANK1, AIF1, MSH5, MICA, HLA-C, HCP5, AGPAT1, C4A, CSNK2B, LY6G5B, IER3, TNXB, HLA-DQB1, BAG6, HLA-DRA, HLA-DRB1, C4B, PSMB9, PRRC2A, CYP21A2, SLC7A9, LY6G5C, HSPA1A, HLA-B, HLA-DRB6
12	p13.1	rs6488549	12390168:13390168	AED	0.0125066	-0.00914474	0.00366149	0.431299	-0.00266881	0.00339124	0.134295		0.769406	0.00267264	0.00911682	0.0124664	0.0197883	0.0079191	0.01621		-0.00750337	0.00339771	0.027219	0.0008113	0.00311742	0.794673	APOLD1	APOLD1, CDKN1B, GPR19
21	q22.11	rs28451064	35093827:36093827	SSE	0.0127387	0.0133205	0.00534743	4.84537e-12	0.0343991	0.00497781	5.26982e-05	SSE_Female	0.494633	-0.00689551	0.0100964	4.17279e-05	0.0359026	0.00876043	0.000683043	SSE	0.00889189	0.00472555	0.0598821	0.0347661	0.00432793	9.5151e-16	AP000320.7	SLC5A3, AP000317.1, MRPS6, LINC00310, LINC00649
10	q23.33	rs7101207	95622857:96622857	CED	0.0129206	-0.0172323	0.0069318	2.69854e-05	-0.0271566	0.00646952	0.0456595		0.164554	0.0897601	0.0645774	0.0684395	0.100577	0.0551963	0.0361465		-0.0160136	0.00689221	0.020156	-0.0254256	0.00642553	7.59099e-05	NOC3L, TBC1D12	NOC3L, PDLIM1, PLCE1, TBC1D12, HELLS
16	p13.3	rs3211995	1589006:2589006	CED	0.013013	-0.0121459	0.00489074	3.42376e-07	-0.0229796	0.00450697	0.0189376		0.0018629	-0.0282494	0.00907868	0.192831	0.0101396	0.00778605	0.000664265		-0.015768	0.00430572	0.000250138	-0.0146675	0.00390061	0.000169705	SLC9A3R2	TSC2, NTHL1, SLC9A3R2, MIDN, RAB26, PKD1
17	p13.2	rs67833703	3388437:4388437	CED	0.0130532	0.00949312	0.00382426	4.76419e-08	0.0193504	0.00354396	0.00249943		0.238672	0.14471	0.122808	0.00346041	-0.306667	0.104887	0.00259612		0.00962411	0.00382241	0.0118085	0.0189786	0.00354194	8.40277e-08	RP11-459C13.1, ZZEF1	ZZEF1, ANKFY1, CYB5D2, UBE2G1
2	p14	rs2249105	64787896:65787896	AED	0.0134694	-0.00885718	0.00358425	0.904508	0.000401525	0.00334692	0.0268335		0.0236849	0.0203883	0.00901199	0.799912	0.00198074	0.0078147	0.0176325		-0.00486291	0.0033305	0.144259	0.000646299	0.00307662	0.833615	CEP68	RAB1A, SLC1A4, CEP68
11	p15.4	rs4910498	9265503:10265503	AED	0.0136054	0.00914444	0.00370589	5.7821e-11	0.0225554	0.00344375	0.000802375		0.103834	-0.0162605	0.00999656	0.000385641	-0.0306852	0.00864348	0.00457615		0.00607487	0.0034748	0.0804182	0.0152618	0.00319918	1.83742e-06	SWAP70	SBF2, WEE1, ADM, SWAP70
8	p23.1	rs2980423	7642575:8642575	SSE	0.0137628	0.0088282	0.00358371	1.36939e-11	0.0225074	0.00332874	0.000720668		0.000524958	0.0419545	0.012097	0.206686	0.0132182	0.0104677	0.0094187		0.0115009	0.0034361	0.000816683	0.0216543	0.00317221	8.71594e-12	FAM86B3P, SGK223	ALG1L13P, AC103957.2, ENPP7P1, FAM86B3P, RPL10P19, FDFT1, NEIL2, MSRA, FAM66A, CLDN23, MFHAS1, PRAG1, FAM167A, BLK, ERI1, FAM85B
17	p13.1	rs12951053	7077407:8077407	CED	0.0159655	-0.0163877	0.00680063	4.62629e-08	-0.0346787	0.00634522	0.0117698		0.00540375	0.0252758	0.00908486	0.642083	0.00368632	0.00793111	0.012195		-0.00142553	0.00544425	0.793444	-0.019706	0.00495468	6.97159e-05	TP53	SLC35G6, ZBTB4
8	q22.3	rs35783704	105466258:106466258	CED	0.0161157	-0.014389	0.0059797	0.000543781	-0.0192761	0.0055739	0.123427		0.0213352	-0.0563228	0.0244652	0.150897	-0.0303178	0.0211067	0.0295837		-0.0167529	0.00580871	0.00392539	-0.0199959	0.00538915	0.000206926	RP11-127H5.1
7	p15.2	rs61056117	26745997:27745997	CED	0.0162847	0.0145893	0.00607256	1.17469e-10	0.0361642	0.005613	0.00244451		0.709915	0.0165437	0.0444754	0.00117993	-0.132865	0.0409575	0.00159757		0.0146251	0.00601674	0.0150684	0.0330482	0.00556102	2.80159e-09	HOTTIP
17	q21.32	rs79553110	45175925:46175925	AED	0.0166365	-0.0144116	0.00601818	0.426729	-0.00443296	0.00557742	0.101619		0.574311	0.00568025	0.0101122	0.041794	-0.0179598	0.00882267	0.0390722		-0.00915653	0.0051716	0.0766372	-0.00829527	0.00471439	0.0784817	NPEPPS	HOXB2, RPRML, TBKBP1, SCRN2, COPZ2, EFCAB13, TBX21, SKAP1
12	p11.23	rs1098708	26821112:27821112	AED	0.0191324	-0.00879743	0.00375483	1.41795e-06	-0.0167495	0.00347311	0.0122037		0.0050786	0.03045	0.0108662	0.665397	-0.00407178	0.00941501	0.00466742		-0.00461095	0.00354892	0.193857	-0.015231	0.00325847	2.95011e-06	RP11-582E3.2, STK38L	MED21, TM7SF3, STK38L, C12orf71
20	q13.33	rs8118848	61961572:62961572	CED	0.0192823	-0.00847429	0.00362141	3.32666e-06	-0.0155956	0.00335411	0.031397		0.356005	-0.0132674	0.0143738	0.0417043	0.0255445	0.0125431	0.0209518		-0.00876038	0.00351167	0.0126082	-0.0128501	0.00324026	7.31584e-05	ZBTB46	OPRL1, TPD52L2, UCKL1, ZBTB46
3	q23	rs55788564	140644408:141644408	CED	0.0201854	0.0195846	0.00843107	1.51845e-08	0.0442418	0.00781696	0.0142238		0.546845	-0.0113412	0.0188234	0.00478917	0.0462467	0.0163933	0.00171659		0.014417	0.0076945	0.0609743	0.0446132	0.00705585	2.56748e-10	ZBTB38	ZBTB38
11	p15.5	rs73413011	1441481:2441481	CED	0.0212794	-0.0097245	0.00422251	1.29882e-06	-0.0189387	0.00391288	0.00392327		0.744089	0.00778212	0.0238388	0.0581581	-0.0395516	0.0208763	0.0676194		-0.00919195	0.00415779	0.0270512	-0.0196383	0.00384591	3.28571e-07	AC051649.1	LSP1, TNNT3
11	q13.1	rs10750766	64973798:65973798	CED	0.0220647	-0.00815278	0.00356129	5.10956e-12	-0.0227634	0.00329763	0.00240129		0.00482275	-0.0303498	0.0107665	0.18248	-0.0124336	0.00932625	0.101683		-0.0103419	0.00338112	0.00222289	-0.0216155	0.003109	3.5878e-12	RN7SL309P, KAT5	EFEMP2, RNASEH2C, SNX32, OVOL1, LTBP3, PCNX3, FIBP, KCNK7, SIPA1, POLA2, CTSW, MAP3K11, SPDYC
3	p21.31	rs7638388	47414974:48414974	CED	0.022191	0.0135612	0.00592942	1.01412e-08	0.0315664	0.0055103	0.0261238		0.706591	-0.00577111	0.0153307	0.0789152	0.0235075	0.0133788	0.063436		0.0110456	0.0055302	0.04579	0.0303976	0.00509507	2.43018e-09	MAP4	MAP4, MON1A, MRPS18AP1, SPINK8, ZNF589, AMT, ALS2CL, ATRIP, SCAP, SHISA5, CAMKV
11	p15.1	rs5219	16909572:17909572	AED	0.0229397	-0.00859066	0.00377701	0.784212	-0.000956865	0.00349431	0.136083		0.0810894	-0.0177192	0.0101573	0.00870867	-0.0229672	0.00875457	0.0624944		-0.00969956	0.00354018	0.00614664	-0.00398154	0.00324535	0.21988	KCNJ11	AC124798.1, ABCC8, NUCB2, PIK3C2A, NCR3LG1, OR7E14P, KCNJ11
7		rs236607	74571121:75571121	SSE	0.0241169	-0.00812759	0.0036038	7.3699e-09	-0.0193077	0.00333896	0.000581734		0.0314631	0.0328249	0.0152582	0.565506	0.00768959	0.0133805	0.0556305		-0.00596378	0.0035073	0.0890577	-0.0177251	0.00323962	4.46584e-08
16	p13.3	rs8061324	3041490:4041490	CED	0.025823	-0.00903211	0.0040523	1.64814e-06	-0.0180185	0.00375971	0.0133595		0.177502	0.0133345	0.00988821	0.0204771	0.0198702	0.00857361	0.104215		-0.00581589	0.00374965	0.12089	-0.0119076	0.00344319	0.000543592	LA16c-306E5.3	CLUAP1, NAA60, TRAP1, AC025283.3, NLRC3, ZNF174
1	p32.1	rs11207416	59142102:60142102	CED	0.0270485	0.00866177	0.00391787	0.000613615	0.0124448	0.00363289	0.0080125		0.00222946	-0.0288162	0.00942266	0.0127519	-0.0202297	0.00812189	0.0039709		0.00313751	0.00361762	0.385785	0.00699737	0.00331626	0.0348565	RP11-470E16.1	AC093425.1
12	q24.12	rs6490037	111213671:112213671	SSE	0.0273599	-0.0105837	0.00479691	5.83608e-14	-0.0334243	0.00444928	0.000387246		0.000269222	-0.116814	0.0320584	0.350732	-0.0254975	0.0273231	0.0150836		-0.01291	0.0047441	0.00650289	-0.0332195	0.00439144	3.89014e-14	CUX2	TMEM116, MAPKAPK5-AS1, PHETA1, ADAM1A, NAA25, MAPKAPK5, SH2B3
7	q22.3	rs2392929	105914069:106914069	AED	0.0289592	-0.00975261	0.00446536	0.00119941	-0.013371	0.00412802	0.0200436		0.0140212	-0.0221304	0.0090074	0.75513	0.00244491	0.00783914	0.0197914		-0.0121945	0.00400073	0.0023032	-0.00993741	0.00365255	0.00651478	CTB-111H14.1, RP5-884M6.1	CCDC71L, PRKAR2B, AC004917.1, LINC02577
5	p13.3	rs12659332	32437490:33437490	CED	0.0291195	0.00861262	0.00394733	0.00115557	0.0118901	0.00365885	0.133458		0.0623258	-0.0184605	0.00990335	0.00366125	0.0249339	0.00857961	0.000463463		0.00490115	0.00366679	0.181343	0.0138973	0.00336558	3.63966e-05	CTD-2066L21.3
21	q22.3	rs137923903	44329595:45329595	CED	0.0294439	-0.0339007	0.0155686	1.69148e-08	-0.0809865	0.0143563	0.0261893	CED	0.109764	-0.0527595	0.0329888	0.00114815	-0.0942891	0.0289964	0.172188		-0.0373359	0.0140794	0.00800633	-0.0836054	0.0128658	8.12373e-11	AP001046.6, SIK1
1	p22.2	rs10493818	88833557:89833557	CED	0.0296068	0.00784128	0.00360463	0.000527767	0.0115931	0.00334451	0.145569		0.00578843	0.0251805	0.00912406	0.957917	0.00041593	0.00788232	0.0143013		0.0101822	0.00335249	0.00238779	0.00988783	0.00307883	0.00132017	GTF2B	KCNJ10, GTF2B, KYAT3, RBMXL1, GBP3
19	p13.2	rs4804517	6906066:7906066	CED	0.02962	-0.00888597	0.00408521	3.0089e-06	-0.0176378	0.00377654	0.0124834		0.996121	-5.16742e-05	0.0106293	0.00279238	-0.0277413	0.00927818	0.00296816		-0.00774898	0.00381327	0.0421428	-0.0190738	0.00349788	4.95379e-08	AC125387.1, CTB-133G6.1
7	q21.13	rs39239	89254827:90254827	CED	0.0298054	-0.00773215	0.0035588	1.95628e-10	-0.021019	0.00330223	0.00342405	AED	0.062785	-0.0167562	0.00900482	6.94237e-05	-0.0310516	0.00780431	0.0268691		-0.00895122	0.0033097	0.00683989	-0.0225425	0.00304119	1.24049e-13	DPY19L2P4	DPY19L2P2, AC002064.1, STEAP2-AS1, DPY19L2, CFAP69, STEAP1, STEAP2, DPY19L2P4, GTPBP10
8	p21.2	rs537551388	22899889:23899889	CED	0.0298842	0.00899571	0.00414236	1.30065e-07	0.0203788	0.00386038	0.00465975		0.644993	-0.00766148	0.0166288	0.068041	0.0262604	0.0143909	0.00465218		0.00802245	0.00401952	0.0459479	0.0207736	0.00372856	2.52572e-08	SLC25A37
1	p34.2	rs71654213	41889815:42889815	CED	0.0327701	-0.00786327	0.00368319	3.92611e-06	-0.0157773	0.00341841	0.0287888		0.00187052	0.0318199	0.0102301	0.376846	0.00781526	0.00884345	0.0128502		-0.00330961	0.00346543	0.339559	-0.0127104	0.00318849	6.7102e-05	HIVEP3	SVBP, HIVEP3
10	q25.1	rs574277571	105789667:106789667	CED	0.0328801	0.0358073	0.0167829	1.15777e-05	0.0677232	0.0154425	0.00447676		0.174477	0.0560881	0.0413019	0.738174	0.0124474	0.0372371	0.00773168		0.0386814	0.0155483	0.0128525	0.0596118	0.0142645	2.92762e-05	RP11-127O4.3, RP11-127O4.2
2	p21	rs76099932	42666683:43666683	CED	0.0329034	-0.0131238	0.00615195	2.73817e-09	-0.0340103	0.00571902	0.0116633	CED	0.060715	-0.0299073	0.015945	4.93145e-06	-0.0631456	0.0138221	0.00925121		-0.0152985	0.00573957	0.00768882	-0.0382691	0.00528453	4.43055e-13	AC098824.6, AC016735.1
19	p13.11	rs12977269	16715648:17715648	CED	0.0335677	-0.00930394	0.00437782	7.5564e-09	-0.0234811	0.00406364	0.0109219		0.919603	-0.00100982	0.0100046	0.00499682	-0.0242225	0.00862801	0.00877591		-0.00797103	0.00401065	0.046871	-0.0236157	0.0036763	1.32939e-10	MYO9B	HAUS8, MYO9B
12	q24.21	rs6490022	115430574:116430574	CED	0.0363647	0.00763779	0.00364948	4.86048e-10	0.0210539	0.00338276	0.00687413		0.000128541	0.0398323	0.0104004	0.229281	0.0108778	0.00904802	0.0151671		0.0111673	0.00344363	0.00118325	0.019806	0.00316856	4.084e-10	RP11-116D17.1, RP11-1028N23.3
15	q24.1	rs351186	74096129:75096129	AED	0.03712	-0.0074465	0.00357239	0.000330821	-0.0119209	0.00332062	0.0486214		0.0891913	-0.0153877	0.00905294	0.0025049	-0.0237786	0.00786593	0.0183914		-0.00851647	0.00332302	0.010381	-0.0137145	0.0030592	7.3592e-06	RP11-60L3.2	SCAMP2, CSK, ULK3, MPI, CCDC33, AC023300.1
16	p13.3	rs10500326	4418326:5418326	CED	0.037862	0.00766248	0.00369034	0.000557622	0.0118165	0.00342359	0.0372356		0.988337	0.000131688	0.00900848	0.00118567	-0.0253649	0.00782241	0.00853873		0.00658031	0.00341491	0.0539879	0.00583933	0.00313636	0.0626287	UBN1	GLYR1, UBN1, PPL, ROGDI
12	q24.31	rs58609847	121391994:122391994	CED	0.0413839	0.00726144	0.00356009	0.00755417	0.008843	0.00331025	0.108748		0.416672	0.00731522	0.00900641	0.00716335	0.0209285	0.00778206	0.124937		0.00726871	0.00331082	0.0281319	0.0106947	0.00304612	0.000446553	KDM2B	AC048337.1, ANAPC5, RNF34, MORN3, KDM2B
8	p23.1	rs7006985	9064437:10064437	CED	0.0466142	-0.00760263	0.00382079	7.15396e-10	-0.0217772	0.00353356	0.00127913		0.900271	-0.00140255	0.0111917	0.000149206	0.0367591	0.00969172	0.0049738		-0.00695544	0.00361588	0.0544071	-0.014909	0.00331979	7.09122e-06	TNKS	TDH, TNKS, FAM86B3P, FDFT1, FAM66A, CLDN23, MFHAS1, FAM167A, BLK, MSRA
16	q23.2	rs2966114	81091248:82091248	CED	0.0474729	0.00723157	0.00364849	4.53406e-09	0.0199334	0.00339945	0.00541417		0.00498622	-0.0297491	0.0105937	0.0146685	-0.0226834	0.0092942	0.0310693		0.00331031	0.00344964	0.337251	0.0149048	0.0031926	3.03322e-06	CMIP
18	q11.2	rs11664194	19521031:20521031	SSE	0.0507347	-0.00697703	0.00357113	2.19003e-09	-0.0198574	0.00331878	0.00431194	SSE_Female	0.0197466	0.0210175	0.00901538	0.000130043	-0.0297451	0.00777275	9.14922e-06	SSE	-0.00318023	0.00332014	0.338133	-0.0213821	0.0030522	2.46181e-12	RP11-863N1.4, RPS4XP18
16	p13.3	rs45593734	0:834732	CED	0.0514423	-0.0107841	0.00553657	1.52342e-05	-0.022153	0.00512161	0.126314		0.0249575	-0.0271491	0.0121082	0.529551	-0.00661411	0.0105203	0.0651463		-0.0136141	0.00503515	0.00685503	-0.0191758	0.00460491	3.12427e-05	PDIA2	PDIA2, TMEM8A, DECR2, HBZ, AXIN1, FAM234A, HBQ1, NME4, HBM
5	q33.3	rs2419923	157482779:158482779	CED	0.0525714	0.00723361	0.00373167	2.11615e-06	0.0163973	0.00345778	0.0469989		0.767915	0.00337681	0.0114427	8.41481e-05	0.0393122	0.00999605	0.000105652		0.00686286	0.00354778	0.0530627	0.0188462	0.0032678	8.05747e-09	RP11-32D16.1, EBF1
5	q23.2	rs335210	122001864:123001864	SSE	0.0538546	0.00956679	0.00496198	6.97859e-09	0.0265981	0.00459244	0.000459315		0.699829	-0.00349684	0.00906961	2.44068e-05	0.0330266	0.00782465	0.00109681		0.00655738	0.00435309	0.131971	0.0282452	0.00396066	9.93256e-13	PRDM6	PRDM6
12	q21.33	rs10858935	89723202:90723202	SSE	0.0541645	0.00739881	0.00384247	2.91893e-08	0.0197465	0.00356018	0.0184129		0.391061	-0.00864508	0.0100792	0.117271	-0.0135456	0.00864773	0.102991		0.00536296	0.00359041	0.135257	0.0149216	0.00329211	5.82763e-06	RNU6-148P, RP11-654D12.2	POC1B
4	q21.21	rs113087495	80682951:81682951	CED	0.0564975	0.019465	0.0102061	0.0151804	0.0231353	0.00952828	0.208614		0.0593226	0.0915003	0.0485184	0.459721	0.0295409	0.0399571	0.0290547		0.0225174	0.00998752	0.0241611	0.02348	0.0092684	0.0112983	PRDM8, FGF5	PRDM8
2	q24.2	rs61692975	162173036:163173036	CED	0.0570045	-0.012594	0.00661697	9.5821e-07	-0.030338	0.00619117	0.00146836		0.639818	-0.00628064	0.0134214	0.00193999	-0.0357637	0.0115384	0.0299902		-0.0113595	0.00593488	0.0556172	-0.0315509	0.00545545	7.32157e-09	SLC4A10	PSMD14, AC009299.3
9	q31.2	rs4743021	108914561:109914561	CED	0.0574375	0.00698063	0.00367406	1.30463e-05	0.0148038	0.0033958	0.045748		0.042143	0.01858	0.00914271	0.128919	0.0120668	0.00794694	0.0607099		0.00859336	0.00340909	0.0117116	0.0143812	0.00312266	4.116e-06	RP11-308N19.4
6	q25.1	rs57139556	150498511:151498511	CED	0.0579566	-0.0122106	0.00644005	1.35823e-08	-0.0338837	0.00596667	0.00998461	CED	0.00219347	-0.115917	0.0378438	0.0202454	-0.0723521	0.0311609	0.0708642		-0.0151293	0.00634878	0.0171707	-0.0352442	0.00586021	1.80819e-09	PLEKHG1
2	p24.1	rs1344653	19230845:20230845	CED	0.0582034	-0.00687088	0.00362737	4.32448e-07	-0.0169727	0.00335808	0.00280233		0.00128431	0.0324481	0.0100775	0.316149	0.00878897	0.00876776	0.0109414		-0.00236095	0.003413	0.489094	-0.0136771	0.00313594	1.29228e-05	AC010096.2, AC019055.1
16	p11.2	rs9926533	30514179:31514179	SSE	0.0606105	-0.00690819	0.00368174	1.24914e-10	-0.0219302	0.00340869	0.00233304		0.0512047	-0.0179322	0.00919668	0.00745157	-0.0213113	0.00796349	0.0981425		-0.00843093	0.00341802	0.0136397	-0.0218344	0.00313368	3.22311e-12	STX1B	CCDC189, PRR14, BCKDK, STX1B, ITGAX, HSD3B7, ZNF668, PHKG2, ITGAM, PRSS53, KAT8, ZNF646, ITGAD, MAPK3, STX4, ARMC5, VKORC1, SETD1A
6	q27	rs9689079	169087148:170087148	SSE	0.0614121	-0.0080404	0.00429846	1.67292e-09	-0.0238772	0.00396166	0.0013948	CED	0.837199	0.00199995	0.0097331	1.00227e-05	0.0371309	0.00840562	0.0031501		-0.00640174	0.00393207	0.103508	-0.0127884	0.00358359	0.000358878	RP11-417E7.2, XXyac-YX65C7_A.2	LINC01615, LINC02544
2	q14.1	rs112641450	113903586:114903586	AED	0.0638476	-0.00850598	0.00458975	1.33479e-05	-0.0185432	0.00425846	0.0168476		0.0513157	-0.0433704	0.0222534	0.963394	-0.000884911	0.0192811	0.0334408		-0.00992856	0.00449514	0.0271932	-0.0177219	0.00415825	2.02728e-05	RABL2A, RP11-395L14.17	PAX8, PSD4, AC010982.1, RPL23AP7, DDX11L2
13	q34	rs9550246	114010489:115010489	CED	0.0654004	-0.00655996	0.00356031	4.07515e-08	-0.0181175	0.00330142	0.00444012		0.181457	-0.0131103	0.00981071	0.0366102	0.0177045	0.00847035	0.0085973		-0.00732223	0.00334675	0.0286794	-0.0133933	0.00307603	1.33624e-05	TMEM255B	TMCO3, TMEM255B
8	p23.1	rs17150796	9284034:10284034	SSE	0.0665551	0.0102153	0.00556789	1.4428e-08	0.0292576	0.00516144	0.00686441	CED	0.33867	0.0129753	0.0135609	4.8117e-05	0.0477744	0.0117522	0.0148532		0.0106135	0.00515064	0.0393405	0.0322517	0.00472575	8.81267e-12	LINC00599, snoU13	FDFT1, MSRA
20	p12.3	rs6039216	8122480:9122480	CED	0.0669423	-0.00755925	0.00412606	0.00213306	-0.0117534	0.00382711	0.266901		0.487397	-0.00728704	0.010493	8.66544e-05	-0.0357991	0.00911913	0.00457615		-0.0075228	0.00383986	0.0500973	-0.0153543	0.00352893	1.35523e-05	PLCB1	PLCB1
1	q42.13	rs849903	227637659:228637659	CED	0.0670214	0.00657053	0.00358743	1.84425e-07	0.0173871	0.00333433	0.00617147		0.4672	0.00656803	0.00903375	0.0223618	0.0179081	0.0078397	0.0965774		0.00657019	0.00333415	0.0487728	0.0174669	0.00306834	1.25102e-08	WNT9A, CICP26	OBSCN, RNF187, WNT9A, WNT3A, IBA57, MRPL55, OBSCN-AS1
10	q24.32	rs76752100	104294086:105294086	SSE	0.069436	-0.0120863	0.00665695	3.36525e-21	-0.0587379	0.00621442	9.16607e-08		0.994926	-0.000214305	0.0337001	0.00125225	-0.0947357	0.0293573	0.0170288		-0.0116405	0.00653075	0.0746832	-0.0602818	0.0060797	3.57346e-23	CNNM2	SFXN2, BORCS7, AS3MT, NT5C2, ATP5MD, TRIM8, WBP1L, MFSD13A, CNNM2, ACTR1A
6	p21.2	rs62398607	38645523:39645523	AED	0.071241	-0.00770404	0.00427065	8.60712e-06	-0.0176117	0.00395802	0.00310515		0.676895	-0.00416806	0.0100023	0.00314899	-0.0257893	0.00873318	0.00590854		-0.00715882	0.00392763	0.0683512	-0.0190052	0.00360505	1.35076e-07	SAYSD1, KCNK5	SAYSD1, ANKRD18EP
4	q21.23	rs1563000	86247929:87247929	CED	0.0747432	-0.00784499	0.00440223	2.89996e-05	-0.0170669	0.00408174	0.0880684		0.914301	0.0018467	0.0171601	0.105168	0.0239979	0.0148103	0.0542161		-0.00724654	0.00426415	0.0892417	-0.014168	0.00393503	0.000317639	ARHGAP24	ARHGAP24
9	q31.3	rs12347096	112647957:113647957	CED	0.0772086	0.018441	0.0104356	0.00132722	0.0311566	0.00970586	0.0298156		0.5311	-0.00775679	0.0123844	0.080491	0.0187529	0.0107288	0.0528434		0.00756317	0.0079802	0.343261	0.0255741	0.00719763	0.000380673	SVEP1
22	q13.2	rs739292	41868857:42868857	CED	0.077806	0.00625349	0.00354592	3.30021e-06	0.0153131	0.0032922	0.0217325		0.100198	-0.0155204	0.00944085	0.830123	-0.00175713	0.00819001	0.0840825		0.00356159	0.0033195	0.283303	0.0129385	0.00305464	2.27861e-05	LINC00634, SEPT3	CYP2D7, SMDT1, CCDC134, LINC00634, CYP2D6, NAGA, PHETA2, SNU13, L3MBTL2, AC254562.2, TNFRSF13C, NDUFA6, WBP2NL, AC254562.1
1	q25.3	rs861585	184237925:185237925	AED	0.0817416	-0.006176	0.00354804	7.07697e-07	-0.0162911	0.00328488	0.010751		0.584435	0.00498833	0.00912066	0.0358026	0.0166734	0.00794252	0.0630374		-0.00470857	0.00330665	0.154456	-0.0114761	0.00303551	0.000156435	EDEM3, FAM129A	FAM129A, EDEM3
6	q27	rs4709981	165679399:166679399	SSE	0.0831221	0.00614923	0.0035486	5.00248e-09	0.0193231	0.00330457	0.00132366		0.487301	0.00644335	0.00927608	0.00725323	0.0214798	0.00799944	0.0561466		0.00618678	0.00331435	0.0619488	0.0196375	0.00305423	1.27928e-10	RP11-252P19.1	PDE10A
13	q13.3	rs7322054	37746708:38746708	SSE	0.084963	0.00617401	0.00358412	2.13275e-09	0.0198925	0.00332224	0.00151245		0.00160708	-0.0328156	0.0104012	0.410793	-0.0074033	0.00900086	0.00474321		0.00203575	0.00338858	0.547995	0.0166197	0.00311671	9.68999e-08	TRPC4
4	p15.33	rs2702565	14578484:15578484	AED	0.0870703	0.00645221	0.00377086	8.03958e-06	-0.0156041	0.00349535	1.53712e-05		0.008015	0.0249649	0.00941479	0.868993	0.00133434	0.00808989	0.00819611		0.00901147	0.00350052	0.0100437	-0.0129395	0.00320866	5.51468e-05	RP11-665G4.1	CPEB2, LINC00504, AC098829.1
11	q23.2	rs7128648	112405129:113405129	AED	0.08873	-0.00620557	0.00364574	2.04462e-06	-0.0160586	0.00338139	0.03149		0.0166572	-0.0217804	0.00909653	0.563681	0.00454046	0.00786379	0.0103074		-0.00836108	0.00338407	0.0134842	-0.0128442	0.00310638	3.55281e-05	NCAM1	NCAM1
11	q13.1	rs112437639	65031612:66031612	CED	0.0924197	-0.023576	0.0140101	4.26611e-06	-0.059143	0.0128624	0.0554061		0.546386	-0.0211072	0.0349925	0.0210604	-0.0692318	0.0300093	0.11063		-0.0232349	0.0130064	0.0740302	-0.0607088	0.0118222	2.81939e-07	RP11-770G2.2	RNASEH2C, OVOL1, RIN1, CTSW, SIPA1, SPDYC
12	q24.13	rs11066196	112155122:113155122	CED	0.0970099	-0.0101725	0.00612971	1.03293e-07	-0.0302315	0.00568149	0.0063146		0.00235708	-0.107241	0.0352598	0.413261	-0.0246908	0.0301778	0.00588447		-0.01302	0.00603913	0.0310881	-0.0300418	0.0055834	7.42537e-08	HECTD4	ERP29, HECTD4, MAPKAPK5-AS1, TMEM116, PHETA1, NAA25, MAPKAPK5, SH2B3, ACAD10
12	q24.12	rs4098854	111536797:112536797	CED	0.105262	-0.0097474	0.0060174	2.44663e-07	-0.0287506	0.00556973	0.0204701		0.000378848	-0.0499223	0.0140432	0.00982169	-0.031449	0.0121792	0.00853873		-0.0159795	0.00553102	0.00386388	-0.0292173	0.0050652	8.0099e-09	ATXN2	TMEM116, MAPKAPK5-AS1, PHETA1, NAA25, MAPKAPK5, SH2B3, ACAD10
7	p22.3	rs12699561	1518418:2518418	CED	0.106023	0.00593331	0.00367083	5.90487e-08	0.0184404	0.0034011	0.00255581		0.0514062	0.0178179	0.00914595	0.000283472	0.0287841	0.00792871	0.0183861		0.00758219	0.00340668	0.0260354	0.0200479	0.00312566	1.41778e-10	MAD1L1	MRM2, TONSL, AC104129.1, MAD1L1, PDE4DIP, STARD3
4	q32.1	rs17033041	155891307:156891307	AED	0.106073	0.0116091	0.00718339	0.000151443	0.0250593	0.00661409	0.0819013		0.0041502	0.0390613	0.0136254	0.899252	0.00148426	0.0117234	0.0182841		0.0175798	0.00635438	0.00566505	0.0193672	0.00576054	0.000773674	MTND1P22, RP13-487K5.1	GUCY1A1, AC104083.1
17	q21.32	rs8081301	46539302:47539302	CED	0.113423	-0.00638784	0.00403527	3.74294e-06	-0.0173148	0.00374349	0.00218167		0.00129015	-0.0400224	0.0124348	0.956826	-0.000583785	0.0107834	0.00447219		-0.00959241	0.00383823	0.0124482	-0.0155153	0.00353645	1.14789e-05	GIP	CALCOCO2, SNF8, IGF2BP1, GIP, SUMO2P17, HOXB2, TTLL6, UBE2Z, ATP5MC1
15	q22.31	rs11071908	66442853:67442853	AED	0.117113	0.00590433	0.00376788	2.48711e-08	0.0194522	0.00348955	0.00833828		0.000735212	-0.0307311	0.0091013	0.753293	0.00247465	0.00787346	0.00289669		0.000544059	0.00348134	0.875813	0.0166648	0.00319026	1.7542e-07	RP11-321F6.1
6	q26	rs9365555	163257127:164257127	SSE	0.117554	-0.0058926	0.00376492	3.24902e-08	-0.0193434	0.00349937	0.00040158		0.00258638	0.0286955	0.00952268	0.190284	0.0107251	0.00818853	0.00588447		-0.00121692	0.00350121	0.728162	-0.0147001	0.00321785	4.91734e-06	PACRG, RP3-495O10.1	QKI
16	q21	rs28802661	64765028:65765028	OED	0.119162	0.00556049	0.00356829	0.0702412	-0.00600012	0.00331432	0.0103654		0.765032	-0.0389697	0.130385	0.0190073	0.273475	0.116595	0.00480308		0.00552716	0.00356695	0.12125	-0.00577448	0.00331298	0.0813363	RP11-256I9.2
11	p11.2	rs4752931	46262516:47262516	CED	0.119939	-0.00793223	0.00510098	0.0002339	-0.0173531	0.00471636	0.019062		0.168084	0.0124439	0.00902755	0.0010376	0.0255998	0.00780378	0.00776902		-0.00300102	0.00444105	0.499202	-0.0058615	0.00403644	0.146462	F2, CKAP5	LRP4, ACP2, CKAP5, F2, C11orf49, NR1H3, C1QTNF4, DDB2, MYBPC3, ZNF408
3	p24.1	rs2643826	27062988:28062988	CED	0.123175	-0.00589456	0.00382369	0.00202627	-0.0108871	0.00352744	0.190397		0.0237854	-0.0208968	0.00924338	0.9309	-0.000691038	0.0079692	0.00822476		-0.00808665	0.00353331	0.0220974	-0.00921671	0.00322558	0.00427153	RNU1-96P, AC137675.1	NEK10, SLC4A7
13	q34	rs66656189	110407856:111407856	SSE	0.127742	0.00544126	0.00357255	2.49318e-08	0.0184552	0.00331095	0.000899942		0.00801901	0.0239274	0.0090241	0.0256262	0.0175305	0.00785439	0.0350655		0.00794601	0.00332172	0.0167505	0.0183157	0.00305096	1.93395e-09	COL4A1	COL4A1
13	q12.12	rs61948063	24751848:25751848	AED	0.130479	0.0081769	0.0054072	5.50917e-07	0.025082	0.00500854	0.00291161		0.00967817	-0.0589066	0.0227673	0.270218	-0.0217994	0.0197712	0.0285615		0.00459505	0.00526086	0.382423	0.0222549	0.00485518	4.56724e-06	AL359538.1, ATP12A	ATP12A
4	q24	rs56388530	106410958:107410958	SSE	0.131126	0.00626981	0.00415306	4.42877e-08	0.0210925	0.00385386	0.000648748		0.329173	0.00909092	0.00931635	0.0148077	0.0196668	0.00806946	0.0324694		0.00673749	0.00379323	0.0757019	0.0208277	0.00347761	2.11027e-09	NPNT	TBCK
16	q12.2	rs55872725	53309123:54309123	CED	0.142396	0.00521736	0.00355664	0.00332779	0.00966149	0.00329097	0.0411829		0.000244115	0.0334568	0.00911895	0.731012	-0.00271987	0.00791161	0.00129852		0.00894598	0.00331353	0.00693741	0.00783517	0.00303857	0.00992108	FTO
11	q14.1	rs4944176	77052987:78052987	SSE	0.145474	0.00840659	0.0057749	1.29173e-09	0.0325238	0.00535924	0.000827364		0.00893327	0.0321961	0.0123129	0.261156	0.0120088	0.010687	0.0376298		0.0126961	0.00522841	0.0151704	0.0284015	0.00479062	3.05621e-09	RP11-91P24.7	RSF1, AAMDC, AQP11, INTS4, AP002812.3, AP002812.2, CLNS1A
4	p14	rs4488948	37827029:38827029	CED	0.148409	-0.00523334	0.00362124	1.44985e-05	-0.0145376	0.00335253	0.00665015		0.974871	0.00029026	0.00921448	0.0110894	0.0203983	0.00803075	0.0178662		-0.00449438	0.00337032	0.182362	-0.00935276	0.00309377	0.00250204	RP11-600L4.1, RP11-83C7.1	LINC02513
10	p12.31	rs11012732	21330104:22330104	SSE	0.159935	0.00530966	0.00377832	3.51948e-09	0.0206716	0.00350033	7.04798e-05		0.980543	-0.00024826	0.0101796	2.66807e-05	0.0374199	0.00890801	0.00238865		0.00463669	0.0035422	0.190539	0.0229117	0.00325784	2.02451e-12	MLLT10	NEBL, MLLT10
5	q22.3	rs2921626	113933063:114933063	CED	0.160379	0.00500454	0.00356498	2.00951e-07	0.0171571	0.00330029	0.00208497		0.208333	-0.0122089	0.0097035	0.000132995	-0.0320749	0.00839368	0.00877791		0.00295744	0.00334629	0.376806	0.0105651	0.0030714	0.00058208	RP11-438C19.1, TRIM36	ROBO1
8	p21.2	rs62501777	25430846:26430846	CED	0.170924	0.0056011	0.00409064	1.0049e-07	0.0202519	0.00380243	0.00673666		0.00186772	-0.0338642	0.0108858	0.0605555	-0.0175534	0.00935287	0.0631794		0.000717815	0.00382921	0.851302	0.0148896	0.00352245	2.36779e-05	EBF2, RNA5SP258	EBF2
10	q11.21	rs11239271	44876294:45876294	SSE	0.178771	-0.00541736	0.00402911	5.02269e-08	-0.0203746	0.00373796	0.00384837		0.521639	0.00639403	0.00997771	0.124445	-0.0133865	0.0087128	0.000148767		-0.00376138	0.003736	0.314034	-0.0192883	0.00343517	1.96614e-08	TMEM72-AS1	RASSF4, TMEM72, ALOX5
10	q24.32	rs377697866	104388113:105388113	SSE	0.179809	0.00581366	0.00433419	1.01335e-08	0.0230592	0.00402517	0.000786671		0.00889846	-0.0392281	0.0149946	0.385241	0.0111623	0.0128555	0.00536634		0.0023406	0.00416374	0.574022	0.021997	0.00384128	1.02536e-08	NT5C2	CNNM2, NT5C2, BORCS7
2	q24.3	rs6727986	164480159:165480159	AED	0.184883	-0.00491401	0.00370624	0.000234234	-0.0126874	0.00344861	0.0517063		0.119053	-0.0148035	0.00949663	0.000281004	-0.0296799	0.00817041	0.0658421		-0.00622118	0.00345262	0.0715655	-0.0152569	0.00317719	1.57067e-06	AC092684.1
18	q21.1	rs8098210	44531657:45531657	CED	0.188393	-0.00505231	0.00384102	3.70634e-08	-0.0196895	0.00357696	0.00358803		0.953384	0.000528285	0.00903686	0.0090296	0.0205071	0.00785384	0.0475899		-0.0041984	0.00353496	0.23496	-0.012784	0.00325525	8.59363e-05	RP11-157P23.2
16	q23.2	rs200554033	80992667:81992667	AED	0.195787	-0.00495329	0.00382892	1.80222e-06	-0.0169638	0.00355293	0.000454561		0.791139	-0.002382	0.0089943	0.00247718	0.0236622	0.00781871	0.0080477		-0.0045588	0.00352298	0.195659	-0.0100106	0.00323463	0.00196925	CMIP
2	p16.1	rs736345	55346146:56346146	AED	0.208219	-0.00581265	0.00461878	2.756e-06	-0.02009	0.00428508	0.0158148		0.173344	0.0472011	0.0346665	0.0147567	0.074892	0.0307133	0.027509		-0.00488799	0.00457832	0.285684	-0.0182764	0.00424397	1.659e-05	SMEK2, PNPT1	PPP4R3B, CFAP36, AC015982.1, PNPT1
6	q22.31	rs283048	118136902:119136902	SSE	0.235573	-0.00431371	0.0036368	4.50122e-09	-0.0197733	0.00337145	0.00016769		0.043194	0.0304099	0.0150399	0.00520223	0.0363798	0.0130187	0.0894409		-0.00239551	0.00353492	0.497981	-0.0162441	0.00326378	6.45552e-07	SLC35F1	PLN, CEP85L
3	p21.31	rs34221642	48465078:49465078	SSE	0.240267	0.00895685	0.00762725	6.02042e-09	0.0412338	0.00708915	0.00193735		0.614417	0.0157666	0.0312963	0.00444762	0.0796917	0.0280137	0.0640135		0.00933864	0.00741036	0.207592	0.0435484	0.00687251	2.34878e-10	ARIH2	WDR6, ZNF589, AMT, UBA7, IP6K2, ARIH2, P4HTM, NCKIPSD
6	q22.1	rs210639	117393104:118393104	AED	0.245387	-0.00416644	0.00358672	0.00158106	-0.0104853	0.00331873	0.0236717		0.00148829	-0.043369	0.0136495	0.866457	0.00200545	0.0119257	0.00228205		-0.00669852	0.00346895	0.053484	-0.00958752	0.00319724	0.00271145	GOPC	GOPC, DCBLD1
4	q25	rs7440002	111181501:112181501	AED	0.248698	-0.00677262	0.00587125	0.0466643	-0.0108123	0.00543511	0.113228		0.320077	0.0213739	0.0214959	0.0095111	-0.0491704	0.0189608	0.0069249		-0.00481861	0.00566379	0.394894	-0.0137248	0.0052247	0.00861644	PITX2, RP11-777N19.1
6	q25.1	rs67737839	151896945:152896945	SSE	0.257334	-0.0065074	0.00574494	7.19311e-13	-0.0384211	0.00535394	1.05954e-06		0.111633	-0.0203924	0.0128177	0.00217927	-0.0344378	0.0112362	0.0160134		-0.00883011	0.00524245	0.0921147	-0.0376841	0.0048333	6.35178e-15	ESR1
19	p13.2	rs11671314	6758405:7758405	SSE	0.26633	0.00611225	0.00549882	5.31908e-10	0.0316009	0.00508894	0.00066898		0.10846	0.0343023	0.0213693	0.000379458	0.0665051	0.0187109	0.030299		0.00786294	0.00532534	0.139806	0.034005	0.00491056	4.36373e-12	INSR
1	q25.1	rs3766694	174643207:175643207	SSE	0.270371	-0.00402104	0.00364816	1.64864e-08	-0.019116	0.003386	0.00242355	SSE_Female	0.91167	0.00100443	0.00905434	0.00133215	-0.0251259	0.00782924	0.00298866	SSE	-0.00331914	0.00338382	0.326649	-0.020063	0.00310781	1.07745e-10	KIAA0040	KIAA0040
17	q23.3	rs4277405	61048918:62048918	AED	0.272885	-0.00404934	0.00369315	7.39124e-08	-0.0185045	0.00343846	0.000564223		0.0734021	-0.0162996	0.00910388	0.83552	0.00163826	0.00789033	0.0610287		-0.00578044	0.00342227	0.0912073	-0.0152898	0.00315216	1.23104e-06	RP11-269G24.6, CTD-2501B8.5	KCNH6, TANC2, ACE, FTSJ3
16	q23.1	rs11641308	74812023:75812023	CED	0.276604	0.00411102	0.00377856	0.0082148	0.00925046	0.0034998	0.0696344		0.730367	-0.00330361	0.00958563	0.0132092	-0.0205107	0.00827638	0.00772646		0.00311384	0.0035153	0.375728	0.00473596	0.00322345	0.141772	BCAR1, RNU6-758P	TMEM170A, AC009054.2, BCAR1, CFDP1, CHST6
2	q34	rs1047891	211040507:212040507	AED	0.303875	-0.00392805	0.00382046	7.49767e-06	-0.0158471	0.00353795	0.0220772		0.81127	-0.00220125	0.00921835	0.00512803	0.0222787	0.00795933	0.000897163		-0.00367493	0.00352936	0.297762	-0.00955691	0.00323295	0.00311558	CPS1	PHGDH, AARS, PSAT1
13	q12.3	rs7338758	29637828:30637828	AED	0.312952	0.00564637	0.00559572	0.0023878	0.0158668	0.00522407	0.118488		0.978952	-0.000386632	0.0146545	0.0163959	0.0305567	0.0127314	0.0554686		0.00487867	0.00522758	0.350688	0.0179837	0.00483302	0.000198428	SLC7A1
4	p14	rs6812640	37887900:38887900	CED	0.317514	-0.00356192	0.00356341	2.54601e-07	-0.0169887	0.00329591	0.00291341		0.000886798	0.0328275	0.00987406	0.00481193	0.0240749	0.00853854	0.0114021		0.000631275	0.00335182	0.850612	-0.0116637	0.00307479	0.000148642	RP11-83C7.1, RP11-83C7.2
5	q13.2	rs891004	71314128:72314128	AED	0.31988	-0.0036606	0.00368007	0.0157488	0.0082401	0.00341246	0.00249789		0.264817	-0.00996479	0.00893619	0.00622471	0.0213101	0.0077891	0.00372057		-0.00457472	0.00340282	0.178822	0.0103448	0.00312565	0.000934185	ZNF366, CTC-347C20.2	FCHO2, TMEM171
6	p21.33	rs12665166	30708242:31708242	SSE	0.324007	0.00469915	0.00476461	3.56954e-09	0.0260392	0.00441097	0.000719142	SSE_Female	0.00537213	-0.0260625	0.00936121	0.000105225	-0.0315682	0.00813886	0.00107132	SSE	-0.00163015	0.00424625	0.701049	0.0129601	0.00387805	0.000832016	XXbac-BPG299F13.16, HLA-C	DDR1, LY6G5B, TCF19, PSORS1C3, NOTCH4, AL662844.4, TNF, MICB, VARS2, HLA-B, GZMK, MICA, HLA-C, CCHCR1, HLA-L, TMEM154, HLA-S
8	p23.1	rs6991853	9567157:10567157	CED	0.341755	0.00394543	0.00415	6.93931e-08	0.0206725	0.00383324	0.000771675		0.806444	0.00280456	0.0114463	0.0118026	0.0249395	0.00990393	0.0141422		0.00381288	0.00390149	0.328426	0.0212284	0.00357482	2.87966e-09	MSRA	MSRA, AF131215.2
1	p36.21	rs77194816	15509119:16509119	CED	0.350995	-0.00377627	0.00404891	0.000666556	-0.0127658	0.00375128	0.0138952		0.377239	0.00827283	0.00936887	0.00115715	0.0264378	0.00813589	0.000179546		-0.00188004	0.00371668	0.61297	-0.00589259	0.00340661	0.0836744	DDI2, RP4-680D5.9	PLEKHM2, AGMAT, CASP9
10	q24.33	rs7067666	104832452:105832452	SSE	0.354417	-0.0032982	0.00356154	3.16211e-08	-0.0182753	0.00330328	0.000268079		0.709438	0.0044771	0.0120153	0.0179552	0.0247673	0.0104651	0.0147614		-0.00267021	0.00341469	0.434226	-0.0143754	0.00315008	5.03076e-06	NEURL1	BORCS7, NT5C2, SH3PXD2A
10	q26.13	rs72830780	123635862:124635862	CED	0.370411	0.00450618	0.00503087	6.45017e-06	0.0210756	0.00467184	0.0122403		0.389201	-0.012511	0.0145294	0.0189436	0.0292257	0.0124536	0.0145906		0.00268437	0.00475395	0.572304	0.0220811	0.00437418	4.46349e-07	PLEKHA1	PLEKHA1
4	p11	rs13109500	48323980:49323980	AED	0.379947	-0.00350336	0.00399018	9.14269e-06	-0.0163615	0.00368782	0.0137117		0.601975	-0.037387	0.0716815	0.0042175	0.173946	0.0607856	0.0122693		-0.00360803	0.00398401	0.365133	-0.0156636	0.00368105	2.08867e-05	OCIAD1	ZAR1, OCIAD1, OCIAD2, SLC10A4, SPATA18, NFXL1, FRYL
16	q24.3	rs2460448	89200881:90200881	CED	0.401232	0.00400052	0.00476578	5.51257e-06	0.0200573	0.00441362	0.00120222		0.0030051	0.0268201	0.00903784	0.535421	-0.00484961	0.00782499	0.0018465		0.00896524	0.00421559	0.033446	0.0140458	0.00384427	0.000258477	DPEP1	SPATA2L, LINC02166, DPEP1, VPS9D1, DEF8, FAM157C, VSIG10, ZNF276, SPATA33, CPNE7, ZNF395, SPIRE2, TCF25, DBNDD1, CDX2, SH3PXD2A, CDK10, RPL13, SPG7, CDS1, CHMP1A, MC1R, FANCA, ANKRD11
7	q36.1	rs73725602	148973261:149973261	AED	0.40983	0.00406402	0.00493089	0.0167629	0.0109514	0.00457854	0.0890563		0.140784	0.0258455	0.017547	0.00529961	0.041792	0.0149877	0.0475175		0.00565815	0.00474702	0.233286	0.0135838	0.00437878	0.00192089	SSPO	SSPO, ZNF467
8	p23.1	rs7008695	9471963:10471963	AED	0.411541	0.00315828	0.003846	0.000808073	0.0119323	0.00356179	0.0941684		0.583747	0.00653938	0.0119347	0.0281064	0.022677	0.010327	0.0407769		0.00347637	0.00366062	0.342282	0.0130746	0.00336714	0.000103182	MSRA	MSRA
10	q11.21	rs61852531	44839894:45839894	SSE	0.441522	-0.00329979	0.00428752	2.36279e-08	-0.0222626	0.00398733	0.000829367		0.39707	-0.0107599	0.0127054	0.00420354	-0.0320675	0.011202	0.0143832		-0.00406247	0.00406245	0.317307	-0.0233652	0.00375646	4.97135e-10	TMEM72-AS1
13	q34	rs9521634	110333899:111333899	SSE	0.445389	-0.0028041	0.00367448	1.5917e-10	0.0218008	0.00340813	2.40324e-07	CED	0.521065	0.00584679	0.00911121	0.000750108	0.0267211	0.00792697	0.0419536		-0.00159391	0.00340779	0.639981	0.0225684	0.00313101	5.67672e-13	COL4A1	COL4A1
8	p23.1	rs17708276	9699548:10699548	AED	0.445848	0.00363863	0.00477287	1.13263e-06	0.0215011	0.00441751	0.00232627		0.656331	0.00418052	0.00939462	0.00389821	-0.0234013	0.00810716	0.0131175		0.0037498	0.00425521	0.378195	0.0112214	0.00387903	0.00381771	MSRA	FDFT1, MSRA, AF131215.2
13	q34	rs7334306	110462520:111462520	SSE	0.45181	-0.00360129	0.00478638	1.62244e-12	0.0313944	0.00444422	2.46925e-08	SSE_Female	0.52843	0.00852347	0.0135204	0.0045448	0.0332147	0.0117042	0.0600055	SSE	-0.00225099	0.00451199	0.617857	0.0316238	0.00415478	2.71105e-14	COL4A2	RAB20
11	p11.2	rs10838163	43297428:44297428	CED	0.459918	0.00263627	0.00356744	1.72233e-06	0.0158171	0.00330646	0.00274165		0.0488932	-0.0177489	0.0090113	0.00804858	-0.0207723	0.00783804	0.0388072		-0.000125723	0.00331697	0.969765	0.0102895	0.00304648	0.000731493	HSD17B12
16	q22.1	rs17881561	70013010:71013010	CED	0.468746	-0.00504861	0.00696819	0.000425235	-0.0229556	0.00651412	0.00233253		0.0627907	-0.0328696	0.0176646	0.932155	-0.00130588	0.0153391	0.088642		-0.00879484	0.00648208	0.174847	-0.0196477	0.00599585	0.0010496	FUK	CLEC18A, PDXDC2P, CLEC18B, EXOSC6, COG4, CMTR2
14	q24.2	rs227426	69956664:70956664	SSE	0.468898	0.00260951	0.00360293	4.63999e-11	0.0219318	0.00333186	2.23454e-06		0.981666	-0.000234351	0.0101978	0.0270144	0.0194951	0.00881568	0.00565387		0.00229392	0.00339714	0.499517	0.0216272	0.00311669	3.944e-12	SMOC1	SMOC1
2	p24.3	rs6431689	14904546:15904546	SSE	0.500964	-0.0023971	0.00356194	3.37144e-08	-0.0183161	0.00331741	0.000345365		0.341827	0.0143412	0.0150867	0.00100475	-0.042705	0.0129822	0.00207748		-0.00151333	0.00346663	0.662443	-0.019811	0.00321413	7.10507e-10	NBAS	NBAS
8	q24.3	rs10096038	140595080:141595080	AED	0.527059	-0.0023184	0.00366543	9.01053e-05	0.013374	0.00341533	0.000795553		0.0135334	-0.0229675	0.00930007	0.947012	-0.000541178	0.00814295	0.0097193		-0.00509472	0.00341013	0.135176	0.0112923	0.00314952	0.000336555	TRAPPC9	TRAPPC9
5	q23.2	rs1428396	122131418:123131418	SSE	0.599264	-0.00188916	0.00359525	7.97899e-09	-0.0192656	0.00333941	0.000173815	AED	0.189127	-0.013481	0.0102657	0.000132834	0.0338764	0.00886442	0.000240078		-0.00315561	0.00339317	0.352378	-0.0126611	0.00312502	5.08852e-05	CTD-2347I17.1, CEP120	KRT8P33
16	q22.1	rs77870048	69465021:70465021	CED	0.59944	-0.00386601	0.00736091	0.000252014	-0.0251956	0.00688352	0.00838331		0.000617265	-0.0678074	0.0198013	0.950616	-0.00105529	0.0170391	0.00530513		-0.0116293	0.0068996	0.0918931	-0.0218086	0.00638238	0.000633153	WWP2	CLEC18A, CLEC18B, EXOSC6
10	q25.1	rs143109501	107243927:108243927	AED	0.601497	-0.00935359	0.0179102	1.65413e-07	0.0868786	0.0165966	8.11126e-05		0.90903	-0.00633761	0.0554648	0.0191003	0.106245	0.0453325	0.0282136		-0.0090688	0.0170436	0.594662	0.0891676	0.015585	1.0566e-08	RP11-56I23.1, RP11-298H24.1
5	q15	rs6875109	95569295:96569295	SSE	0.601872	0.00355827	0.0068204	8.76319e-09	-0.0363256	0.00631382	1.77659e-05		0.028314	-0.0380111	0.0173326	0.155951	0.0214771	0.015137	0.00486746		-0.00201542	0.00634671	0.750824	-0.0277593	0.00582722	1.90041e-06	CAST	AC008906.1, CAST, ERAP1, ERAP2
10	q25.1	rs191784289	106394942:107394942	OED	0.618018	-0.00811608	0.0162757	1.50775e-05	0.0640264	0.0147947	0.000803213		0.0452475	0.13802	0.0689254	0.396832	0.049916	0.0589117	0.165604		-0.000397932	0.0158401	0.979958	0.0631893	0.0143491	1.0642e-05	SORCS3
13	q12.11	rs9509847	21818314:22818314	AED	0.623759	0.00186407	0.00380012	6.1067e-08	0.0191116	0.00352881	4.3787e-05		0.000266439	0.0417088	0.011438	0.0744007	0.0177457	0.00994603	0.0496889		0.00582496	0.0036063	0.106263	0.0189589	0.00332569	1.19295e-08	FGF9, RN7SL766P
11	p15.5	rs138429802	371030:1371030	AED	0.62698	0.00176386	0.00362947	0.000201128	0.0125303	0.00337048	0.000217869		0.625822	0.00505973	0.0103763	0.0593432	0.0169723	0.0090005	0.0515279		0.00212315	0.00342594	0.535437	0.0130766	0.00315642	3.43004e-05	CHID1	PNPLA2, CD151, PIDD1, CHID1, AP006621.1, AP006621.5, CRACR2B, TSPAN4, AP2A2
6	p22.3	rs2504808	21924253:22924253	AED	0.62909	0.00181243	0.00375236	0.00303335	0.0103102	0.00347803	0.0465266		0.415212	0.00730458	0.0089652	0.0415319	-0.0158303	0.00776657	0.0252326		0.00263113	0.0034614	0.447174	0.00594359	0.00317427	0.0611477	RP3-404K8.2, HDGFL1
10	q22.2	rs2177843	74909877:75909877	AED	0.630208	-0.00358589	0.00744832	0.000343965	0.0247068	0.00690177	0.00183248		0.00966406	0.0235914	0.00911624	0.192309	0.0103178	0.00791359	0.0237096		0.00729368	0.00576791	0.206041	0.0184904	0.00520147	0.000378199	SYNPO2L	FUT11, NDST2, CFAP70, FAM149B1, NUDT13, ECD, CHCHD1, MYOZ1, MRPS16, SYNPO2L
7	q31.1	rs17155335	107389683:108389683	SSE	0.635344	-0.00181962	0.00383707	3.66048e-08	-0.0195762	0.00355496	2.72583e-05		0.60808	-0.0056195	0.010958	0.00605261	0.0257048	0.00936387	0.00645564		-0.00223465	0.00362147	0.537198	-0.0138719	0.00332351	2.99447e-05	NRCAM	PNPLA8, NRCAM
20	q12	rs7275102	39511753:40511753	SSE	0.644481	0.00186368	0.00403881	1.94499e-09	-0.0225152	0.00375089	9.73644e-06		0.916493	0.0012498	0.0119196	0.00544474	-0.0287414	0.0103399	0.00803186		0.00180046	0.00382519	0.637866	-0.0232392	0.00352605	4.37689e-11	RP4-620E11.5, CHD6	CHD6, PLCG1
11	p15.5	rs217230	1515507:2515507	AED	0.658872	-0.00166826	0.00377885	0.0016583	-0.011001	0.00349738	0.0467378		0.752473	0.0030416	0.00964409	0.00138064	0.0268651	0.00839811	0.00949076		-0.00104139	0.0035184	0.767242	-0.0054045	0.0032286	0.0941412	AC051649.6, H19	H19, MRPL23, TNNT3, MRPL23-AS1
13	q34	rs9549328	113136156:114136156	AED	0.686718	-0.00161654	0.00400816	0.000962937	0.0122793	0.00371967	0.00241737		0.573157	0.0115575	0.0205132	0.0891391	-0.0302807	0.0178121	0.0617777		-0.00113207	0.00393377	0.773514	0.0105008	0.00364112	0.00392711	MCF2L	AL356740.1, MCF2L, MCF2L-AS1
10	q24.33	rs7916056	104497914:105497914	SSE	0.693594	-0.00185723	0.004714	2.21662e-11	0.029245	0.00437052	7.50607e-07		0.00342294	0.0272647	0.00931404	0.359828	0.00741222	0.00809454	0.00517324		0.00408131	0.00420599	0.331868	0.0243168	0.00384575	2.56472e-10	ST13P13, RPEL1	BORCS7, INA, PCGF6, ATP5MD, SH3PXD2A, CALHM2, WBP1L, CNNM2
19	q13.2	rs9304578	38750337:39750337	SSE	0.697257	0.00137971	0.00354657	5.79343e-09	-0.0191862	0.00329496	2.15389e-05	AED	0.33686	0.00858198	0.00893575	4.63784e-05	0.031761	0.00779656	0.000147377		0.00235986	0.00329642	0.474062	-0.0114657	0.00303505	0.000158247	CAPN12	ACTN4, SARS2, LGALS7, AC022144.1, LGALS4, CAPN12, RINL, LGALS7B
13	q34	rs4773140	110454237:111454237	SSE	0.69824	-0.00159419	0.00411193	1.48817e-15	0.0303757	0.00380714	4.41682e-09	AED	0.684863	0.00414627	0.0102165	0.0034553	-0.0257455	0.00880415	0.0133322		-0.000793929	0.00381456	0.835127	0.0215347	0.00349442	7.15625e-10	COL4A1	RAB20
17	q23.3	rs6504213	61881714:62881714	SSE	0.727661	0.00127195	0.00365253	4.79149e-09	0.0198258	0.0033864	5.80682e-05		0.722159	-0.00320595	0.00901613	0.00810886	-0.0207155	0.00782407	0.0242654		0.000640664	0.00338529	0.849897	0.0134294	0.00310779	1.55187e-05	TEX2, RPL31P57	TEX2
6	q27	rs9294987	169220237:170220237	AED	0.754554	-0.00151389	0.00484226	0.00384077	0.0130033	0.00449787	0.0235183		0.61583	0.00461704	0.0092014	0.126118	-0.012184	0.00796529	0.0837138		-0.000184221	0.00428512	0.965709	0.00691367	0.00391657	0.0775244	XXyac-YX65C7_A.4, RP1-137D17.1
5	q33.3	rs62386479	157345025:158345025	AED	0.776272	0.00114525	0.00403002	0.00172155	0.0117352	0.00374385	0.00525018		0.572084	-0.0119059	0.0210726	0.00525209	-0.0497928	0.0178383	0.0190784		0.000684753	0.00395828	0.862657	0.00913933	0.00366402	0.012619	CTC-436K13.2, RP11-542A14.1
13	q34	rs9555690	110513190:111513190	SSE	0.793759	0.0013843	0.00529507	6.42865e-13	-0.0352721	0.00490464	3.79875e-07	SSE_Female	0.996964	-6.82524e-05	0.0179392	0.00226159	-0.0477545	0.0156378	0.00402384	SSE	0.00126789	0.00507846	0.80285	-0.03639	0.00467986	7.49247e-15	COL4A2	COL4A2
13	q34	rs11838776	110540681:111540681	SSE	0.795354	0.00103768	0.00400083	1.34676e-11	0.0250503	0.0037035	6.33226e-06		0.00950847	0.0279033	0.0107592	0.152203	0.0133875	0.0093499	0.0337379		0.00430123	0.00374996	0.251379	0.0234686	0.00344322	9.36854e-12	COL4A2	COL4A2
13	q34	rs656533	110293123:111293123	SSE	0.805372	-0.00150645	0.00611381	1.19923e-14	-0.0439439	0.00569461	2.75457e-07	SSE_Female	0.112851	-0.0248633	0.015681	2.33582e-06	-0.0646465	0.0136881	0.0279837	SSE	-0.00458846	0.00569618	0.420512	-0.0469984	0.00525776	3.9318e-19	RN7SL783P, COL4A1
15	q26.3	rs8025126	101289567:102289567	SSE	0.821658	0.000864878	0.00383685	2.11189e-08	0.0199756	0.00356527	0.000254038		0.0875785	0.0197901	0.0115841	0.00323601	0.0295893	0.0100486	0.014126		0.00273581	0.00364226	0.452574	0.0210505	0.00336005	3.72962e-10	CHSY1	CHSY1
12	q13.13	rs7134677	53941498:54941498	CED	0.825974	-0.000797921	0.00362909	0.010563	-0.00860647	0.00336603	0.114669		0.764463	-0.00294448	0.0098271	8.33596e-06	-0.0379424	0.00851281	0.00307425		-0.00105553	0.00340437	0.756521	-0.0125729	0.00313021	5.90354e-05	HOXC4	HOXC4
3	q22.3	rs12107581	137593884:138593884	AED	0.865488	0.000821038	0.00484696	1.57751e-06	-0.0216313	0.00450528	0.000372093		0.00642709	0.0246079	0.00902907	0.374514	-0.00692223	0.00779476	0.0035254		0.00614232	0.00427054	0.150349	-0.0179479	0.00390061	4.19828e-06	MRAS	CEP70, FAIM, MRAS
13	q34	rs11619038	110423799:111423799	SSE	0.869641	0.000853105	0.00519824	3.68814e-10	0.0302187	0.00482186	2.54212e-05	AED	0.283533	-0.0145419	0.0135596	0.00021628	0.0440628	0.01191	0.000582621		-0.00111954	0.00485379	0.817585	0.0321683	0.00446946	6.1387e-13	COL4A1
8	p23.1	rs922050	8721049:9721049	CED	0.894377	-0.000474777	0.00357599	2.34679e-05	-0.0140187	0.00331477	0.00547503		0.00987028	0.0236266	0.00915562	0.995815	4.1652e-05	0.00794011	0.0240101		0.00271528	0.00333093	0.414975	-0.0119319	0.00305891	9.5913e-05	RP11-115J16.1	MFHAS1
16	p12.3	rs9932532	16982912:17982912	OED	0.916216	-0.000387044	0.00367908	0.00374384	0.0099138	0.00341972	0.00869301		0.0144838	-0.0222355	0.00909346	0.935039	0.000650377	0.00797937	0.0292649		-0.00346034	0.00341052	0.310293	0.00847638	0.00314322	0.00700265	XYLT1	XYLT1
7	q34	rs73158615	138937466:139937466	CED	0.940299	0.000477912	0.0063812	0.000214576	-0.0219681	0.00593527	0.000759079		0.0200471	-0.0310259	0.0133408	0.356143	0.0106638	0.0115565	0.00392559		-0.00538787	0.00575656	0.349298	-0.0151572	0.00527966	0.0040934	HIPK2
10	q23.33	rs7070115	95400004:96400004	CED	0.958943	-0.000226715	0.0044039	5.28412e-07	0.0204298	0.00407302	0.000416892		0.00693891	0.0246283	0.00912156	0.509295	0.00521339	0.00789976	0.0265753		0.00447172	0.00396587	0.25951	0.0172343	0.00362017	1.9299e-06	PLCE1
8	p23.1	rs6991320	10022949:11022949	AED	0.969855	0.000144351	0.00381987	0.000109238	-0.0136813	0.00353596	0.00603851		0.798646	0.00316204	0.0123952	0.00804325	-0.0283617	0.0107009	0.00562194		0.000406086	0.00365046	0.911424	-0.0151264	0.00335741	6.62536e-06	RP1L1	RP1L1, SOX7, PINX1, C8orf74, AF131215.2, FAM167A, BLK, MSRA
8	q22.1	rs74900445	94768903:95768903	AED	0.991765	-3.67391e-05	0.00355941	0.084453	-0.00569688	0.00330173	0.243678		0.0450302	0.0405566	0.0202329	0.226389	-0.0213002	0.0176073	0.00887051		0.00118185	0.00350558	0.736016	-0.00622692	0.00324517	0.0550061	GEM	RAD54B
7	q21.2	rs60814640	91786918:92786918	CED	0.992992	6.06172e-05	0.00690149	4.73571e-05	-0.0261795	0.00643485	0.00527687		0.481096	0.00849849	0.0120623	0.0115917	0.0263605	0.0104419	0.0478329		0.00214161	0.0059903	0.720708	-0.0117184	0.00547817	0.0324272	CDK6	CDK6, GATAD1

## Sheet: 4080_irnt
CHR	Band	locus	Range	Type	p_male	beta_male	se_male	p_female	beta_female	se_female	Min P_diff	Type (Rep)	p_male (Rep)	beta_male (Rep)	se_male (Rep)	p_female (Rep)	beta_female (Rep)	se_female (Rep)	Min p_diff (Rep)	Type (Final)	beta_male (Meta)	se_male (Meta)	p_male (Meta)	beta_female (Meta)	se_female (Meta)	p_female (Meta)	Genes	QTL Genes
7	q22.3	rs2392929	105914069:106914069	CED	2.83271e-22	0.0420343	0.00432993	5.32875e-28	0.0420027	0.00382825	0.0607749	SSE_Female	0.0836651	0.0176623	0.0102101	5.11963e-07	0.0473656	0.00943013	0.0039451		0.0383192	0.00398628	7.06224e-22	0.0427615	0.0035471	1.81832e-33	CTB-111H14.1, RP5-884M6.1	CCDC71L, PRKAR2B, AC004917.1, LINC02577
1	p36.22	rs12567136	11383731:12383731	CED	6.40545e-21	-0.0437515	0.00466213	4.56094e-32	-0.0486658	0.00412801	0.0247134	CED	0.00900627	-0.0223312	0.00854931	3.34234e-05	-0.0330883	0.00797425	0.0531317		-0.0388417	0.00409309	2.31988e-21	-0.0453736	0.00366593	3.47722e-35	CLCN6	NPPA, MTHFR, MFN2, CLCN6
10	p12.31	rs12258967	18227959:19227959	CED	1.13826e-20	-0.0352105	0.00377648	1.90143e-19	-0.030156	0.00334331	0.0850256	CED	0.00199964	-0.0274034	0.00886659	9.73733e-05	-0.0322451	0.00827321	0.020525		-0.0340117	0.00347446	1.25447e-22	-0.0304493	0.00309977	8.95689e-23	CACNB2	NSUN6
4	q21.21	rs13125101	80674592:81674592	CED	5.3673e-19	0.0337741	0.00379248	2.00328e-29	0.0378859	0.00336323	0.32711	SSE_Male	0.0144182	0.0222057	0.00907517	3.17391e-10	0.0528092	0.00839301	0.0041361		0.0320542	0.00349922	5.17162e-20	0.0399507	0.00312191	1.7068e-37	PRDM8, FGF5	FGF5
5	p13.3	rs12656497	32331939:33331939	CED	1.71313e-18	0.0308549	0.0035159	1.23376e-32	0.037087	0.00311685	0.0516816	CED	1.62674e-05	-0.0358077	0.00830476	0.000277533	-0.028114	0.00773251	0.0579963		0.0207228	0.0032377	1.54914e-10	0.027974	0.00289084	3.78441e-22	NPR3, CTD-2218G20.1	NPR3
19	p13.2	rs12978472	6757990:7757990	CED	5.99452e-16	-0.0418886	0.00517765	7.36222e-18	-0.0393717	0.00457278	0.0936787	CED	0.000191074	-0.0450088	0.012063	0.018893	-0.026482	0.0112797	0.0453866		-0.042374	0.0047579	5.28903e-19	-0.0375523	0.00423778	7.90808e-19	INSR
19	p13.2	rs167479	11026765:12026765	CED	1.63262e-15	-0.0274754	0.00344852	1.27948e-16	-0.0253443	0.00306229	0.0701018	AED	0.00145485	-0.026	0.00816601	8.49175e-05	-0.0297531	0.00756966	0.0455734		-0.0272521	0.00317686	9.62674e-18	-0.0259644	0.00283879	5.89313e-20	RGL3	ACP5
16	q22.1	rs77870048	69465021:70465021	CED	3.28907e-15	0.0604772	0.00767457	2.20621e-10	0.0434961	0.00685344	0.00497435	CED	0.000172169	0.0678977	0.0180708	0.000179254	0.0630505	0.0168268	0.0216169		0.0616111	0.00706392	2.73477e-18	0.0462784	0.00634717	3.07247e-13	WWP2	CLEC18A, CLEC18B, EXOSC6
1	p36.22	rs10864536	11324575:12324575	AED	4.97065e-13	0.0284873	0.00394195	1.58371e-08	0.0197652	0.00349672	0.00346956		0.00546824	-0.0270152	0.0097235	0.00222953	-0.0278005	0.00909087	0.223473		0.0206529	0.00365316	1.57271e-08	0.0136349	0.00326362	2.94287e-05	C1orf167	MTHFR, MFN2, CLCN6, PLOD1, NPPB, KIAA2013
2	q24.3	rs268263	164454174:165454174	CED	6.77925e-13	0.0289247	0.00402604	4.64601e-20	0.0328598	0.00358222	0.0127532	CED	5.30607e-06	-0.0490728	0.0107772	5.04759e-08	-0.0542675	0.00995563	0.0132557		0.0193728	0.00377147	2.79646e-07	0.0228725	0.00337066	1.15469e-11	AC092684.1
11	q22.1	rs604723	100110546:101110546	CED	2.1871e-12	0.0273011	0.00388763	6.42061e-30	0.0391234	0.00344256	0.0129499	CED	0.859758	-0.00147786	0.00836443	0.000104347	-0.0302795	0.00780252	0.0059025		0.0221886	0.00352545	3.09694e-10	0.0278144	0.00314962	1.03707e-18	ARHGAP42	ARHGAP42
10	q23.33	rs7080472	95512950:96512950	CED	2.67772e-12	-0.0243374	0.00347964	2.8016e-15	-0.0243909	0.0030874	0.0703005	CED	0.0588691	0.0157914	0.00835848	3.03442e-05	0.0326366	0.00782379	0.0165814		-0.0184101	0.00321239	9.98676e-09	-0.016707	0.00287188	5.97546e-09	PLCE1	NOC3L, HELLS
7	q32.3	rs11767602	130691691:131691691	CED	1.18988e-11	-0.0244345	0.00360287	0.00621745	-0.00872086	0.00318731	0.00108839		0.131613	0.0227046	0.0150579	0.00179698	-0.0443029	0.0141899	0.000421657		-0.021882	0.00350397	4.24039e-10	-0.0104299	0.00310982	0.000796972	PODXL	MKLN1
20	p12.2	rs1887320	10465998:11465998	CED	3.10946e-11	0.0236115	0.00355501	4.53113e-06	0.0144266	0.00314612	0.0209277		0.0178285	0.0223403	0.00942895	0.564961	0.00498922	0.00866944	0.0565175		0.0234533	0.00332643	1.78171e-12	0.0133284	0.0029574	6.58179e-06	RP11-103J8.1
11	q24.3	rs7936928	129779168:130779168	CED	1.81321e-10	-0.0228988	0.00359095	7.28921e-09	-0.0183376	0.00317019	0.0428509	AED	2.62278e-05	0.0456652	0.0108602	0.789985	-0.00268392	0.0100773	0.000550347		-0.0161414	0.00340941	2.19727e-06	-0.0169279	0.00302408	2.17196e-08	ADAMTS8	AP002986.1
17	q21.31	rs2301597	42673273:43673273	CED	3.13026e-10	-0.022017	0.00349887	2.33712e-19	-0.0278883	0.00309967	0.031053	CED	2.07587e-05	0.0398262	0.00935448	0.212664	0.0108474	0.00870374	0.00216092		-0.014427	0.00327714	1.071e-05	-0.0235284	0.00292002	7.77948e-16	NMT1	LINC02210, HEXIM1, DCAKD, SPATA32, HEXIM2, ACBD4, DND1P1, LRRC37A4P, NMT1
17	q23.2	rs1476781	58976415:59976415	CED	5.13597e-10	0.026282	0.00422861	4.64547e-05	0.0152972	0.00375586	0.03042		0.102638	-0.0144976	0.00888189	0.00751009	-0.0222588	0.00832568	0.0290505		0.0187467	0.00381799	9.10327e-07	0.00894667	0.00342362	0.00896931	RP11-332H18.4	AC005746.2, TBX2, TBX2-AS1
15	q15.1	rs11856572	40844078:41844078	CED	5.54389e-10	0.0214192	0.0034529	0.000256506	0.0112132	0.00306728	0.0146573		0.00403203	0.0259775	0.00903268	0.465129	0.00610498	0.00835799	0.0271953		0.0220004	0.00322528	9.02646e-12	0.0106069	0.0028795	0.000229974	INO80	SMAD6, NUSAP1, CHP1, RTF1, NDUFAF1, INO80, OIP5, OIP5-AS1, KNSTRN
16	q22.1	rs17881561	70013010:71013010	CED	8.06194e-10	0.0416002	0.00677077	4.10989e-07	0.0306428	0.00605112	0.0463001		0.0248225	0.0358006	0.0159518	0.000254927	0.0544489	0.0148862	0.00579028		0.0407149	0.00623258	6.46438e-11	0.0340186	0.00560569	1.29039e-09	FUK	CLEC18A, PDXDC2P, CLEC18B, EXOSC6, COG4, CMTR2
15	q26.1	rs4932373	90929287:91929287	CED	8.23645e-10	0.022603	0.00368086	5.81808e-23	0.0321531	0.00325839	0.00997705	SSE_Male	0.0438302	0.0175522	0.00870724	3.03989e-06	0.0378258	0.0081016	0.0117457		0.0218372	0.00339037	1.18715e-10	0.0329429	0.00302305	1.1879e-27	FES	FES, PHAX, MAN2A2, RCCD1, FURIN
16	q21	rs28802661	64765028:65765028	CED	9.79055e-10	0.0211173	0.0034544	0.00167809	0.00964556	0.00306985	0.00929612		0.000495753	-0.0284619	0.00817041	0.0151166	-0.0184772	0.00760473	0.0283718		0.0135988	0.00318171	1.91965e-05	0.00570496	0.00284666	0.0450604	RP11-256I9.2
10	q23.33	rs7070115	95400004:96400004	CED	1.19473e-09	0.0212031	0.0034866	5.83097e-10	0.0191756	0.0030952	0.0858718	CED	0.000123965	0.031663	0.00824815	0.00634066	0.0209839	0.00768697	0.0283921		0.0227888	0.00321146	1.28347e-12	0.0194279	0.00287118	1.31932e-11	PLCE1
10	p12.33	rs1888693	17940444:18940444	CED	1.21477e-09	0.0212078	0.0034889	0.00113985	0.0100625	0.00309275	0.014334	SSE_Female	5.3489e-05	0.0345849	0.00855936	0.430343	0.00627668	0.00795912	0.00139328		0.0231137	0.00323081	8.41937e-13	0.00956585	0.00288276	0.000905676	CACNB2	CACNB2
14	q11.2	rs35085068	22909909:23909909	SSE	1.86145e-09	-0.0209496	0.0034859	0.0285119	-0.00676603	0.00308925	0.00205787		0.0221484	0.0185999	0.00812944	0.243655	0.00883969	0.00758172	0.124927		-0.0148071	0.00320378	3.80513e-06	-0.00454402	0.00286088	0.112212	RP11-298I3.1	PRMT5, AJUBA, REM2, RBM23, AL132780.1, C14orf93, HAUS4
17	p13.1	rs5418	6685092:7685092	CED	1.954e-09	0.0209635	0.00349279	4.04092e-06	0.0142593	0.00309352	0.0689929		0.789277	-0.00218718	0.00818393	0.0105696	-0.0194665	0.00761373	0.0254812		0.0173964	0.00321245	6.11842e-08	0.00948054	0.00286598	0.000939808	SLC2A4	ACAP1, CLDN7, EIF5A, DLG4, ELP5, SLC2A4, ACADVL, CTDNEP1, GRAMD1C, DVL2
12	q21.33	rs11105381	89606835:90606835	CED	2.0528e-09	-0.042955	0.00716643	1.09229e-06	-0.0311199	0.00638436	0.113828	AED	0.000612421	-0.0581971	0.0169843	0.0806247	-0.02737	0.0156657	0.00982108		-0.0452585	0.00660273	7.15513e-12	-0.0305858	0.00591224	2.29992e-07	LINC00936, RNA5SP365	POC1B
11	p11.2	rs7294154	48294660:49294660	CED	3.5484e-09	-0.0217605	0.00368552	5.21075e-08	-0.0177773	0.00326537	0.0672057		0.205529	0.0133779	0.0105671	0.000165101	0.0371028	0.00984779	0.000185361		-0.0179497	0.00347994	2.49524e-07	-0.012341	0.00309942	6.84176e-05	OR4A44P, RP11-56P9.5	NUP160, FOLH1B, ANKRD33B, ENPEP, PTPRJ
4	q21.23	rs1563000	86247929:87247929	CED	3.6142e-09	0.0313628	0.00531456	2.00337e-10	0.0299008	0.00470031	0.0831563		0.373816	0.0137821	0.0154965	0.00481273	0.0405301	0.0143749	0.061709		0.0295126	0.00502714	4.34061e-09	0.0309275	0.00446755	4.43124e-12	ARHGAP24	ARHGAP24
4	q23	rs1229984	99739319:100739319	CED	4.34191e-09	0.0675864	0.011512	1.23556e-06	0.050242	0.0103592	0.0235282	AED	0.32701	-0.0453147	0.0462313	2.07014e-05	-0.172271	0.0404599	0.019391		0.0609946	0.0111709	4.75741e-08	0.0365527	0.0100355	0.00027017	ADH1B
7	p21.1	rs57301765	18552733:19552733	CED	4.89682e-09	0.0277925	0.00475006	6.39799e-09	0.0244626	0.00421312	0.0746691	CED	0.035342	0.0215694	0.010249	0.00469102	0.0269561	0.00953281	0.0421492		0.0266921	0.0043097	5.88398e-10	0.0248701	0.00385354	1.09067e-10	HDAC9, TWIST1
11	q11	rs11229818	54732549:55732549	AED	5.57465e-09	0.0203175	0.00348537	0.000130452	0.0118175	0.00308899	0.0492986		0.127902	0.0136841	0.00898797	0.000786851	0.0277346	0.00825999	0.02495		0.0194504	0.0032496	2.15749e-09	0.0137704	0.00289329	1.94131e-06	OR4A17P, OR4A13P	OR4A15
10	q23.33	rs1934967	96241426:97241426	CED	5.63357e-09	0.0240821	0.00413241	5.6724e-05	0.0147969	0.0036752	0.0106259		0.036991	0.0478433	0.0229356	0.0179668	0.0505625	0.0213666	0.0162248		0.0248292	0.00406693	1.02702e-09	0.0158247	0.00362201	1.248e-05	CYP2C9	CYP2C8, TBC1D12, HELLS, NOC3L
8	q12.3	rs16930710	64265141:65265141	SSE	5.79623e-09	0.0272996	0.00468835	0.265056	0.00462993	0.00415418	0.000295705		0.21116	-0.0104273	0.00833901	0.000125681	-0.029653	0.0077317	0.00408965		0.0182386	0.00408674	8.08696e-06	-0.00304992	0.00365942	0.404595	RP11-32K4.1
5	q33.3	rs2161356	157904129:158904129	CED	6.38807e-09	0.023128	0.00398307	0.000562228	0.0122428	0.0035494	0.0185514	CED	8.55993e-05	0.0324104	0.00824931	0.108777	0.0123324	0.00768971	0.0359481		0.0248829	0.00358685	3.99792e-12	0.0122585	0.00322266	0.000142462	EBF1	EBF1
6	q16.1	rs4346856	96380270:97380270	CED	6.55497e-09	-0.0242833	0.00418515	7.73686e-05	-0.0146389	0.00370371	0.0216554		0.594542	0.00551367	0.0103587	0.00369843	0.0277057	0.00954377	0.0263121		-0.020102	0.00388041	2.21446e-07	-0.00909639	0.00345282	0.00842663	UFL1-AS1	UFL1
1	p31.1	rs10782749	81161747:82161747	SSE	6.87615e-09	-0.0210164	0.00362712	0.125185	-0.00493225	0.00321659	8.02379e-05		0.728602	0.00425141	0.0122523	0.0565998	0.0216819	0.0113729	0.0724612		-0.0189804	0.00347792	4.83147e-08	-0.002961	0.00309518	0.338743	RPL7P10, RP3-445O10.1
11	p11.12	rs7121968	48812255:49812255	CED	7.63448e-09	0.0211931	0.00366875	4.31337e-06	0.0149426	0.00325134	0.158047		0.503469	-0.00612218	0.00915054	0.00689505	-0.0230478	0.00852975	0.0689016		0.0174103	0.00340525	3.17445e-07	0.010123	0.00303811	0.000862199	FOLH1, CTD-2026G22.1	FOLH1B, TRIM51DP, ANKRD33B, ENPEP, FOLH1
5	q13.2	rs891004	71314128:72314128	SSE	7.64968e-09	0.0221534	0.00383521	0.0813523	0.00592759	0.00340099	0.000619079		0.0098735	-0.021879	0.00847876	0.164818	-0.0108827	0.00783447	0.0284079		0.0146744	0.00349436	2.67544e-05	0.00326204	0.00311972	0.295736	ZNF366, CTC-347C20.2	FCHO2, TMEM171
11	q22.3	rs4754196	106596777:107596777	CED	7.90115e-09	0.0199141	0.0034508	8.19785e-12	0.0209032	0.00305804	0.000785406		0.223691	-0.0124415	0.0102247	0.00357713	-0.0278412	0.00955611	0.0146011		0.0166055	0.00326961	3.79926e-07	0.0163752	0.00291254	1.88433e-08	RP11-382M14.1, RP11-819C21.1	ALKBH8, AP003057.1, CWF19L2, AP000766.1
6	p21.33	rs3020644	31394626:32394626	CED	9.36441e-09	0.0225444	0.00392611	0.000531707	0.0120368	0.00347452	0.0302027		0.00153228	-0.0256044	0.00807997	3.41321e-06	-0.0351373	0.00756445	0.00427727		0.0133476	0.0035313	0.000156952	0.00381811	0.00315738	0.226561	C2	EHMT2, C6orf48, ATF6B, LST1, HLA-DQA1, HLA-H, HLA-G, NELFE, HLA-S, HLA-DRB5, HLA-A, HSPA1B, AIF1, MICA, HLA-C, TNXA, CSNK2B, LY6G5B, CYP21A1P, PSORS1C3, SLC44A4, TNXB, MICB, HLA-DQB1, HLA-DRA, BAG6, DDAH2, HLA-DRB1, C4B, PRRC2A, TSBP1, PPT2, NCR3, PBX2, HSPA1A, VARS2, HLA-B, EGFL8, HLA-DRB6
5	q23.3	rs17677603	127357493:128357493	CED	1.24083e-08	0.0201806	0.00354399	4.23576e-06	0.0144664	0.00314514	0.0770494		0.0490894	-0.0198942	0.0101092	0.587748	0.00505938	0.00933281	0.0348635		0.0157945	0.00334443	2.32825e-06	0.013507	0.00298045	5.84625e-06	FBN2	FBN2
6	q25.3	rs75391241	159171268:160171268	CED	1.37194e-08	0.0380155	0.00669622	0.000829425	0.019809	0.00592581	0.0035567		0.0115814	0.121829	0.048252	0.873956	-0.00687773	0.0433553	0.00901872		0.0395991	0.00663266	2.36774e-09	0.0193196	0.00587122	0.00099989	FNDC1
6	q14.1	rs7753358	79165210:80165210	CED	1.9114e-08	0.0195055	0.00347066	0.00019666	0.0114384	0.00307208	0.00505168		0.718668	0.00294968	0.00818799	5.31373e-06	-0.0346465	0.00760997	0.000385066		0.016984	0.00319545	1.06627e-07	0.00498051	0.00284871	0.0804057	PHIP	PHIP, IRAK1BP1
15	q23	rs117539635	69182916:70182916	CED	2.45746e-08	-0.065015	0.0116587	7.0479e-09	-0.06016	0.0103902	0.0425437	SSE_Male	0.184261	-0.0342769	0.0258151	0.000795053	-0.0808222	0.0240913	0.0454504		-0.0598077	0.0106254	1.81502e-08	-0.0634005	0.0095407	3.02666e-11	PAQR5	PAQR5
12	q21.33	rs11105377	89588829:90588829	CED	2.52746e-08	0.0196126	0.00352006	4.4644e-21	0.0294162	0.00312199	0.00273186	AED	0.000183911	-0.041074	0.0109801	0.0110019	-0.0260546	0.0102465	0.00208792		0.0139568	0.00335202	3.13131e-05	0.024704	0.00298644	1.31669e-16	ATP2B1	GALNT4, POC1B
6	q27	rs9689079	169087148:170087148	SSE	2.71535e-08	-0.0200269	0.00360252	0.301529	-0.00329419	0.00318845	1.79531e-05		0.0196402	-0.0458705	0.0196589	0.554857	0.0107681	0.0182354	0.0150719		-0.0208666	0.00354351	3.89332e-09	-0.00287703	0.0031408	0.359658	RP11-417E7.2, XXyac-YX65C7_A.2	LINC01615, LINC02544
13	q12.3	rs7328697	31666025:32666025	SSE	2.73134e-08	-0.0199376	0.00358711	0.994511	-2.18207e-05	0.00317196	2.9924e-05		0.507731	0.0088341	0.0133368	0.0594371	-0.0234753	0.0124536	0.0383099		-0.0179966	0.003464	2.04358e-07	-0.00145063	0.00307382	0.636976	B3GALTL, RXFP2
11	p11.12	rs12794900	49376651:50376651	CED	2.84981e-08	0.0195417	0.00352059	1.01724e-07	0.0166474	0.00312696	0.0853611		0.059677	0.0162854	0.00864743	0.00621195	0.021864	0.00798959	0.00641339		0.0190787	0.00326071	4.88376e-09	0.0173403	0.00291188	2.60044e-09	RP11-163O19.11	FOLH1B, TRIM51DP, ANKRD33B, ENPEP
11	p15.5	rs4980379	1388614:2388614	CED	3.10133e-08	0.0197539	0.00356832	2.06471e-20	0.0292862	0.00316264	0.00554964	CED	0.0397952	0.0172451	0.00838776	1.9815e-05	0.0330629	0.00774743	0.000716523		0.0193694	0.00328354	3.6582e-09	0.0298257	0.00292807	2.28695e-24	LSP1	LSP1, MRPL23, TNNI2, TNNT3, MRPL23-AS1
3	p25.3	rs9840982	11064940:12064940	CED	3.10879e-08	-0.024231	0.00437741	0.000976206	-0.0128663	0.00390202	0.0159703		0.00485322	-0.0251786	0.00893842	0.042487	-0.0168553	0.00830803	0.00161646		-0.0244143	0.00393129	5.29002e-10	-0.0135872	0.00353187	0.00011956	ATG7	ATG7, HRH1, VGLL4
11	p11.12	rs61463018	50173092:51173092	CED	3.23196e-08	0.0194665	0.00352102	8.49792e-08	0.0167501	0.00312709	0.285949		0.0779179	0.0213827	0.0121288	0.000177348	0.0424383	0.0113177	0.0141548		0.0196154	0.00338142	6.59392e-09	0.0185721	0.00301415	7.19991e-10	RP11-574M7.2, AC110283.1
1	p36.23	rs1763839	7973336:8973336	CED	4.2299e-08	0.0199272	0.00363553	1.95182e-05	0.0137682	0.00322406	0.0922152		0.00109741	-0.0352767	0.0108055	0.0564085	-0.019371	0.0101529	0.0209076		0.0143136	0.00344573	3.26701e-05	0.0107326	0.00307285	0.000478129	RERE	ENO1, CA6, PRXL2B, SLC45A1, RERE
4	q25	rs7440002	111181501:112181501	SSE	4.31713e-08	0.0240846	0.0043969	0.765591	-0.00115849	0.00388564	1.57962e-05		0.848285	-0.00175497	0.00917345	0.00676066	-0.0231781	0.00855727	0.00744863		0.0192573	0.00396498	1.19263e-06	-0.0049225	0.00353798	0.164126	PITX2, RP11-777N19.1
9	q32	rs117072385	116091380:117091380	SSE	4.62434e-08	-0.0686194	0.0125551	0.760648	0.00338191	0.0111017	1.73775e-05		0.0590715	0.0416033	0.0220385	0.221463	0.0258677	0.0211567	0.0677214		-0.0416122	0.010909	0.000136479	0.00823661	0.00983049	0.402107	AL157702.1, RP11-534I8.1
11	p11.2	rs7117386	47625371:48625371	CED	4.99822e-08	-0.027017	0.00495576	1.18087e-11	-0.0298558	0.00440159	0.0567937		0.2282	0.0127387	0.0105712	0.000199483	0.0366457	0.00985074	0.0266848		-0.019854	0.00448715	9.66037e-06	-0.0187881	0.00401866	2.93637e-06	PTPRJ	NUP160, MYBPC3, ACP2, NR1H3, ENPEP, C1QTNF4, DDB2, PTPRJ
16	p13.3	rs139491786	1586421:2586421	CED	5.24592e-08	-0.112869	0.0207363	4.08683e-08	-0.102134	0.0186128	0.121812		0.000916082	-0.158188	0.0477113	0.0348402	-0.0971837	0.0460521	0.116393		-0.120069	0.0190178	2.72727e-10	-0.101439	0.0172566	4.14614e-09	SLC9A3R2
6	p22.2	rs2032451	25592170:26592170	AED	5.31384e-08	-0.0188022	0.00345581	0.000499956	-0.0106672	0.00306453	0.00265206		0.165426	0.0187336	0.0135056	2.41926e-06	0.0599846	0.0127203	0.000489908		-0.0164956	0.00334795	8.34683e-07	-0.00679147	0.00297929	0.0226338	HFE	BTN3A2, TRIM38, HIST1H3E, HIST1H3G, HIST1H2AE, HIST1H3F
11	p15.4	rs56287081	9692992:10692992	CED	6.17769e-08	0.0239396	0.00442193	3.66858e-13	0.0285911	0.00393394	0.0002193	SSE_Female	0.100435	0.0239246	0.0145632	5.59863e-05	0.0550664	0.0136653	0.000376931		0.0239383	0.00423118	1.53504e-08	0.0306173	0.00378041	5.54422e-16	SBF2	SBF2, ADM, SWAP70
2	p23.3	rs1275988	26414364:27414364	AED	6.79614e-08	-0.0191762	0.0035533	3.39462e-17	-0.0265312	0.00314614	0.0280731		0.114175	0.0143419	0.0090785	0.00601171	0.023092	0.00840525	0.0848514		-0.0147236	0.00330888	8.5981e-06	-0.0204331	0.00294649	4.07037e-12	AC015977.5, KCNK3	AC015977.2, KHK, CIB4, KCNK3
6	q22.33	rs62436817	126672542:127672542	CED	8.57309e-08	0.0186015	0.00347374	1.13223e-15	0.0246732	0.00307941	0.0341244	CED	0.0208771	-0.0186337	0.00806529	0.000121315	-0.0292018	0.00759688	0.000716523		0.012775	0.0031904	6.22261e-05	0.0170702	0.00285386	2.21163e-09	RPS4XP9, RSPO3
11	p11.12	rs11246486	50792160:51792160	CED	1.15703e-07	0.0238356	0.00449695	3.21212e-07	0.0204256	0.0039966	0.140568		0.335761	0.0125615	0.0130496	0.00414036	0.0348558	0.0121556	0.0403109		0.0226389	0.00425159	1.0106e-07	0.0218333	0.00379665	8.88862e-09	AC110283.1, OR4A6P	ENPEP, FOLH1B, AC024405.1
10	q23.33	rs4110517	96150328:97150328	CED	1.16264e-07	0.0189091	0.00356808	3.7186e-07	0.0161399	0.00317526	0.0105208		0.107878	-0.0194344	0.0120871	0.00904774	-0.0294603	0.0112857	0.0661317		0.0158356	0.00342209	3.70162e-06	0.012795	0.00305659	2.83858e-05	RP11-400G3.3, CYP2C9	TBC1D12, HELLS, PDLIM1
12	q21.33	rs12229946	89819258:90819258	CED	1.72501e-07	0.0201986	0.00386429	3.42742e-11	0.0227062	0.00342614	0.0888127	AED	0.0868394	0.0160016	0.00934464	0.00547642	0.0238667	0.00859202	0.136636		0.0195857	0.003571	4.14285e-08	0.0228654	0.00318245	6.72851e-13	RP11-654D12.2	GALNT4
8	q24.12	rs58659618	119920239:120920239	CED	2.09629e-07	0.0215447	0.00415055	1.58728e-05	0.0158839	0.00367995	0.0575169		0.000271547	0.0363678	0.00998676	0.653361	0.00412178	0.00917781	0.00471417		0.023728	0.00383272	5.98248e-10	0.0142548	0.00341561	3.00054e-05	SNORA32, NOV	CCN3, RPL10
16	p12.1	rs2188717	24230230:25230230	CED	2.24006e-07	0.0225932	0.00436292	3.36172e-11	0.0256082	0.00386236	0.00490019	CED	0.700134	-0.00352478	0.00915184	7.16914e-06	-0.0386912	0.00861845	0.00257586		0.0177566	0.00393829	6.52214e-06	0.0148542	0.0035246	2.50405e-05	AC012317.1, TNRC6A	SLC5A11, TNRC6A
1	p36.22	rs880315	10296866:11296866	CED	2.52869e-07	0.0188508	0.00365623	3.21983e-10	0.0203355	0.00323393	0.0456399		0.000436295	0.0338888	0.00963407	0.0257436	0.0198766	0.00891262	0.0241442		0.020744	0.00341834	1.29151e-09	0.0202821	0.00303999	2.52756e-11	CASZ1	CASZ1, KIF1B, MTF2
2	q22.3	rs11674165	145225530:146225530	AED	2.82738e-07	0.018208	0.00354598	0.255189	0.00357031	0.0031378	0.00199206		0.469195	-0.00624664	0.00863033	0.0511685	-0.0155676	0.0079828	0.0290134		0.0146759	0.00327992	7.65996e-06	0.00100914	0.0029203	0.729674	TEX41
5	q32	rs1078721	147857999:148857999	CED	2.89881e-07	-0.0221084	0.00430951	1.18892e-05	-0.0167641	0.00382766	0.17229		0.0032415	0.0397537	0.0135025	0.27422	0.0138543	0.0126707	0.00136303		-0.0163894	0.00410548	6.54987e-05	-0.0142036	0.00366412	0.000106011	SH3TC2	ABLIM3
15	q25.1	rs2062316	80510249:81510249	CED	3.13059e-07	0.0177403	0.00346786	4.39756e-10	0.0192203	0.00308039	0.0175603		0.00370807	-0.0305634	0.0105308	0.166237	-0.0136444	0.00985562	0.0248504		0.0130146	0.00329386	7.7771e-05	0.0162955	0.00294013	2.98266e-08	ABHD17C	ARNT2, ABHD17C
1	q21.3	rs35479618	153162423:154162423	CED	3.80204e-07	0.0668364	0.0131598	1.58018e-08	0.0662572	0.011721	0.782874		0.415731	0.0254962	0.0313273	0.018292	0.0664447	0.0281572	0.0861899		0.0606356	0.0121328	5.80274e-07	0.0662849	0.0108209	9.03247e-10	NPR1	S100A13
6	q25.1	rs67737839	151896945:152896945	CED	4.91819e-07	0.0320256	0.00636731	0.00424798	0.0162607	0.0056872	0.00664854		0.00490625	0.361969	0.128659	0.481506	-0.0729299	0.10361	0.00423548		0.0328317	0.00635953	2.43534e-07	0.0159928	0.00567865	0.00485805	ESR1
12	p12.2	rs17374842	19837687:20837687	CED	5.14389e-07	-0.018252	0.00363509	2.29309e-11	-0.0216048	0.00323113	0.182777		0.959927	0.000446274	0.00888188	0.000590204	0.0284053	0.00826594	0.00100829		-0.0155693	0.00336423	3.6939e-06	-0.0149761	0.00300938	6.47538e-07	CTC-465D4.1, RP11-284H19.1
2	p22.1	rs13032770	40071341:41071341	CED	7.62278e-07	0.0182838	0.00369745	0.138212	0.00485473	0.00327472	0.00584967		0.765073	-0.00255836	0.00856125	0.00709733	-0.0214397	0.00796299	0.0327014		0.0150074	0.00339441	9.81504e-06	0.00105108	0.00302862	0.728554	SLC8A1	SLC8A1
10	q21.2	rs72831344	63018378:64018378	CED	7.65628e-07	-0.0245569	0.00496688	1.05509e-14	-0.0340693	0.00440566	0.0645247	AED	0.000137977	-0.038744	0.0101626	0.361996	-0.00861365	0.00944912	0.00208792		-0.0272923	0.00446243	9.59361e-10	-0.0295237	0.00399297	1.42571e-13	C10orf107
10	q24.31	rs10883543	102052752:103052752	CED	7.84401e-07	0.027205	0.00550774	1.92143e-11	0.0327698	0.00488205	0.00888774	AED	0.158316	-0.0170655	0.0120963	7.11197e-05	-0.0453493	0.0114143	0.016975		0.0196029	0.00501259	9.20167e-05	0.0206889	0.00448871	4.0443e-06	PAX2	PAX2, SEC31B
1	p13.2	rs72699046	112538761:113538761	CED	1.21092e-06	0.0319771	0.00658774	2.33761e-11	0.0391322	0.00585493	0.337524	CED	0.565583	0.0136247	0.0237125	0.000137269	0.0861389	0.0225879	0.013406		0.0306621	0.00634734	1.36053e-06	0.0420916	0.00566763	1.11358e-13	WNT2B	ST7L
5	q33.3	rs7720047	156923813:157923813	CED	1.36528e-06	0.0187194	0.0038755	0.00128827	0.0110834	0.00344352	0.00161692		0.00777749	-0.0245861	0.00923659	0.897282	0.00110678	0.00857322	0.00464592		0.0122368	0.00357368	0.000616734	0.00969746	0.0031954	0.00240677	MARK2P11, CTB-47B8.4
11	p11.2	rs4752977	46800429:47800429	CED	1.36715e-06	-0.0218506	0.00452402	1.4376e-12	-0.0284586	0.00401908	0.00966008		0.0863186	-0.0138011	0.00804627	0.00306357	-0.0223288	0.00753966	0.0741312		-0.0199172	0.00394345	4.40195e-07	-0.0271022	0.00354665	2.14477e-14	MADD	RAPSN, ACP2, NUP160, MYBPC3, C11orf49, PTPRJ, C1QTNF4, NR1H3, MADD, PSMC3, DDB2, SPI1
16	q21	rs35686695	60123261:61123261	CED	1.40537e-06	-0.0182133	0.00377522	3.22275e-08	-0.0185115	0.003348	0.0356228		0.804495	-0.00221657	0.00895451	0.000209828	0.0310041	0.00836297	8.58813e-05		-0.0157991	0.0034787	5.58122e-06	-0.0116719	0.00310818	0.000173197	RP11-354I13.1, GNPATP
9	q31.3	rs12347096	112647957:113647957	CED	1.45164e-06	0.0248222	0.00515201	7.29087e-06	0.0204893	0.00456825	0.261803		0.967189	-0.000447886	0.0108883	0.0045364	0.0288422	0.0101613	0.0246103		0.0201995	0.00465699	1.44145e-05	0.0218937	0.00416655	1.48318e-07	SVEP1
1	p32.1	rs11207416	59142102:60142102	CED	1.58143e-06	-0.0180843	0.0037669	2.1291e-09	-0.0200035	0.00334064	0.174924		0.0780436	-0.0157744	0.0089514	0.0210611	-0.0191708	0.00830986	0.0847288		-0.0177368	0.003472	3.24692e-07	-0.0198876	0.00309955	1.39632e-10	RP11-470E16.1	AC093425.1
8	p23.1	rs7838131	11096163:12096163	CED	1.80604e-06	-0.0166802	0.00349383	4.46336e-12	-0.0214397	0.00309727	0.00173	CED	0.310732	-0.00952392	0.00939511	1.11475e-06	-0.0426621	0.00875808	0.000645263		-0.0158108	0.00327472	1.37826e-06	-0.0237989	0.00292005	3.63446e-16	GATA4	FAM86B3P, AF131215.6, FAM66D, FDFT1, NEIL2, CTSB, AC145124.1, GATA4, FAM66A, AF131216.3, AF131215.2, PRAG1, FAM167A, AC130352.1, BLK, MSRA
17	q21.32	rs17608766	44513271:45513271	CED	1.97686e-06	0.0230404	0.00484454	2.62357e-17	0.0365197	0.00431519	0.000806536	CED	0.543168	0.00529614	0.00871021	0.00424457	0.0233071	0.0081505	0.0486217		0.0188481	0.00423375	8.51234e-06	0.033627	0.00381367	1.17059e-18	RP11-156P1.2	FAM215B, LRRC37A, RPRML, GOSR2, ARL17B, NSFP1
2	p24.1	rs1344653	19230845:20230845	SSE	2.07909e-06	0.0163686	0.0034491	3.68066e-09	0.0180294	0.00305675	0.0126723		0.00118544	0.026349	0.00812548	0.0184093	0.0178279	0.00756254	0.00934663		0.0178923	0.00317491	1.74503e-08	0.0180011	0.002834	2.12766e-10	AC010096.2, AC019055.1
10	q24.32	rs76752100	104294086:105294086	SSE	2.08225e-06	-0.0304973	0.00642664	1.22793e-30	-0.0659975	0.00573478	7.16446e-06		0.231128	-0.0364589	0.0304461	0.000472776	-0.0996188	0.0284944	0.0392181		-0.0307516	0.00628808	1.00602e-06	-0.0673063	0.00562205	4.99016e-33	CNNM2	SFXN2, BORCS7, AS3MT, NT5C2, ATP5MD, TRIM8, WBP1L, MFSD13A, CNNM2, ACTR1A
2	p14	rs2249105	64787896:65787896	CED	2.46728e-06	-0.0168299	0.00357247	3.65272e-09	-0.0187713	0.00318185	0.0764588		0.0157387	-0.0201393	0.00833891	0.934857	0.000635164	0.00777088	0.034184		-0.0173431	0.00328381	1.28204e-07	-0.0159849	0.00294457	5.68034e-08	CEP68	RAB1A, SLC1A4, CEP68
5	p13.3	rs62369525	32219811:33219811	CED	2.47146e-06	0.0171846	0.00364803	9.95454e-12	0.0219933	0.00323069	0.120885		0.000250478	0.031541	0.00861222	0.0954403	0.0133685	0.00801747	0.0612422		0.0193686	0.0033591	8.11648e-09	0.0207885	0.00299656	3.99211e-12	NPR3
5	q15	rs6875109	95569295:96569295	CED	2.48055e-06	0.0200555	0.00425816	8.94958e-05	0.0147804	0.00377289	0.00573422		0.00161341	-0.0304122	0.00964286	0.571361	-0.00507139	0.00895919	0.010032		0.0118202	0.00389528	0.00240933	0.0117901	0.00347715	0.000697005	CAST	AC008906.1, CAST, ERAP1, ERAP2
11	p15.5	rs907613	1374292:2374292	CED	2.9317e-06	0.0173156	0.0037033	9.9843e-11	0.0212045	0.00327859	0.173061	SSE_Female	0.0437068	0.0177612	0.00880575	3.7527e-05	0.033472	0.0081188	0.0846427		0.0173826	0.0034137	3.54302e-07	0.0229245	0.00304007	4.67086e-14	LSP1	LSP1, MRPL23, TNNI2, CTSD, TNNT3, PRR33
19	q13.33	rs73046792	49105705:50105705	CED	3.32621e-06	-0.0216289	0.00465163	5.96409e-11	-0.0269021	0.00411032	0.00907616	SSE_Female	0.688495	-0.00435957	0.0108744	1.19245e-05	-0.0446921	0.0102045	0.00217665		-0.0189577	0.00427678	9.3053e-06	-0.0293855	0.00381265	1.2844e-14	SNRNP70	LIN7B
7	q21.2	rs60814640	91786918:92786918	CED	3.43314e-06	-0.0169196	0.00364395	4.34299e-13	-0.0234452	0.00323607	0.00484988		0.447726	0.00827056	0.0108934	0.00151189	0.0321556	0.0101352	0.0101885		-0.0143846	0.00345573	3.14752e-05	-0.0183013	0.00308275	2.90832e-09	CDK6	CDK6, GATAD1
5	p13.3	rs12659332	32437490:33437490	CED	4.39102e-06	0.0174171	0.00379282	3.48596e-08	0.0185452	0.00336247	0.0418231		0.518947	0.0121298	0.0188064	0.0344514	0.037298	0.0176363	0.0324676		0.0172105	0.00371796	3.67433e-06	0.019203	0.00330297	6.10574e-09	CTD-2066L21.3
5	q15	rs4869313	95723880:96723880	CED	4.54808e-06	-0.0205354	0.00447903	0.00400511	-0.0114336	0.00397303	0.026191		0.00319356	-0.0326706	0.0110794	0.338353	0.00994882	0.0103911	0.00250956		-0.0222401	0.00415254	8.51885e-08	-0.00870638	0.00371102	0.0189717	ERAP2	CAST, ERAP1, ERAP2, LNPEP
11	p11.2	rs3837374	47328404:48328404	CED	5.08241e-06	0.0157741	0.00345808	1.77283e-08	0.0173068	0.00307235	0.0530987		0.297023	-0.00880344	0.00844162	0.00676746	-0.0213769	0.00789324	0.0158233		0.0122424	0.00319999	0.000130371	0.0122171	0.00286311	1.98051e-05	NUP160	NUP160, MYBPC3, C1QTNF4, NR1H3, OR4X1, MTCH2, FNBP4, PSMC3, SPI1, PTPMT1, CELF1
17	q21.31	rs62071370	43944802:44944802	CED	5.45107e-06	0.0212539	0.00467448	2.62771e-10	0.0261835	0.00414319	0.00262884		0.00553154	0.0254684	0.0091791	0.471129	0.00617707	0.00857149	0.000185361		0.0221218	0.00416545	1.09157e-07	0.0223944	0.00373027	1.93188e-09	ARL17B, NSFP1	ARL17A
12	q13.11	rs11168250	47709165:48709165	CED	5.4991e-06	-0.0183495	0.00403735	0.00324017	-0.0104974	0.00356568	0.0288879		0.0570381	-0.0165689	0.00870617	0.271366	-0.00892032	0.00810981	0.0875138		-0.0180344	0.00366268	8.48757e-07	-0.0102419	0.00326411	0.00170259	HDAC7	HDAC7, RPAP3, RAPGEF3, AC004241.1, SLC48A1
20	q13.32	rs73306876	57239829:58239829	AED	5.51599e-06	0.0256084	0.00563529	2.07862e-13	0.0367523	0.00500427	0.060932		0.662102	0.0109736	0.0251101	0.0353834	0.0504194	0.0239632	0.105646		0.0249067	0.00549852	5.90678e-06	0.0373234	0.00489859	2.55232e-14	MRPS16P2, ZNF831	ZNF831
6	p21.33	rs2523578	30828542:31828542	AED	5.51749e-06	0.015939	0.00350752	3.75374e-10	0.0194323	0.00310208	0.00559092	CED	0.13349	0.0121765	0.00811482	8.87833e-07	0.0370102	0.00752859	0.0109682		0.0153467	0.00321963	1.87356e-06	0.0219835	0.00286815	1.7925e-14	XXbac-BPG248L24.12, DHFRP2	FAM8A1, TSSC4, DDR1, OR13C3, LINC00243, LST1, HLA-DQA1, STK19B, HLA-H, CD8A, HLA-G, RNF5, CCHCR1, HLA-S, HLA-DRB5, NFKBIL1, HLA-A, ATP6V1G2, TUBB, GALNT2, BTN3A2, KLRK1, TCF19, HCG27, AL671883.2, PSMA4, PSORS1C2, POU5F1, CD248, MICA, HLA-C, HCP5, TNXA, LY6G5B, IER3, CYP21A1P, PSORS1C3, SLC44A4, FLOT1, TNXB, PSORS1C1, HLA-DQB1, BAG6, HLA-DRA, DDAH2, HLA-DRB1, TMEM154, C4B, TSBP1, NCR3, PBX2, LY6G5…
7	q36.1	rs73728279	150911494:151911494	CED	6.28337e-06	0.0172177	0.00381194	4.01765e-07	0.0171308	0.00337999	0.00465388		0.00854985	0.0238974	0.00908726	0.163594	0.0116905	0.00839158	0.0294541		0.0182172	0.00351519	2.19019e-07	0.0163714	0.00313522	1.77227e-07	PRKAG2	PRKAG2
8	p23.1	rs7837979	9698534:10698534	CED	6.40492e-06	-0.0158461	0.00351144	1.74654e-13	-0.0229487	0.00311487	0.00415666	CED	9.80827e-07	0.0408328	0.00833867	0.00649867	0.0210137	0.00772084	0.00634373		-0.00730919	0.00323621	0.0239105	-0.0167949	0.00288865	6.09566e-09	MSRA	RP1L1, FAM86B3P, NEIL2, FDFT1, FAM66A, XKR6, CLDN23, AF131215.2, FAM167A, BLK, MSRA, SLC35G5
12	q24.12	rs3184504	111384608:112384608	CED	6.77242e-06	-0.0155637	0.00345793	1.83432e-13	-0.022499	0.00305655	0.00340799	CED	0.000113832	-0.0353514	0.00915908	0.406601	-0.00706556	0.00851375	0.0118493		-0.0180323	0.00323505	2.4889e-08	-0.0207369	0.00287677	5.66183e-13	SH2B3	CLUAP1, PRKCA, ICAM1, KLF6, COCH, TSPAN2, RAB11FIP5, TUBB6, GBP5, PTPN4, RNF165, VIM, DUSP18, SPIB, TNFRSF13C, GLB1L2, WARS, LGALS3BP, IDO1, TRIM22, GBP6, MAL, TRAK1, TP53INP2, APOL3, DHRS3, FCGR1CP, UBE2L6, MYADM, PLPP5, RRP12, VPREB3, AHNAK, ANKRD28, LIMK1, GGT5, PRSS23, SYNJ2, PNOC, ANKRD22, VAMP5, GNG7, PPP1R15A, POU2AF1, SFMBT1, SRBD1, EMP1, DPP4, POLD3, FAM241B, OXNAD1, FUZ, APOL2, EZR, FBX…
20	q13.33	rs6742	61874441:62874441	CED	6.9032e-06	0.0212958	0.00473577	0.0347214	0.0088749	0.00420291	0.0498017		0.090211	0.0191697	0.0113139	0.101541	0.0173282	0.0105823	0.000185361		0.0209788	0.00436851	1.56864e-06	0.0100266	0.00390611	0.0102609	SLC2A4RG	STMN3, ZGPAT
6	p21.33	rs1077394	31110384:32110384	CED	7.50774e-06	0.0164572	0.00367437	3.78362e-10	0.0203968	0.00325669	0.0554704	AED	0.220759	-0.0105489	0.00861458	1.23671e-05	-0.0350696	0.00802198	0.00936209		0.0123003	0.00337977	0.000273286	0.0125487	0.00301751	3.20155e-05	BAG6	C6orf48, DDR1, ATF6B, HLA-DQA1, RNF5, CCHCR1, ATP6V1G2, HLA-DRB5, HSPA1B, HCG27, GPANK1, AIF1, MSH5, MICA, HLA-C, HCP5, AGPAT1, C4A, CSNK2B, LY6G5B, IER3, TNXB, HLA-DQB1, BAG6, HLA-DRA, HLA-DRB1, C4B, PSMB9, PRRC2A, CYP21A2, SLC7A9, LY6G5C, HSPA1A, HLA-B, HLA-DRB6
2	q36.3	rs2673142	226656645:227656645	CED	7.88442e-06	0.0155906	0.00348904	0.157062	0.00437706	0.00309327	0.00117934		0.889983	0.00114507	0.00827803	0.0135139	-0.0190774	0.00772342	0.0370338		0.0134115	0.00321513	3.02769e-05	0.00113492	0.00287153	0.692673	AC068138.1, MIR5702
4	q12	rs60991988	54301228:55301228	AED	9.20491e-06	-0.0252613	0.00569563	0.0116728	-0.0126259	0.00500648	0.0307625		0.0107865	-0.0355276	0.0139338	0.000488355	-0.0457304	0.0131129	0.187881		-0.0267311	0.00527218	3.97361e-07	-0.0168376	0.00467718	0.00031828	FIP1L1
1	p34.2	rs71654213	41889815:42889815	CED	1.0373e-05	-0.0157816	0.0035791	8.71543e-10	-0.0194707	0.00317544	0.0437245		0.00163045	0.0291172	0.00924128	0.352055	0.00799422	0.00859017	0.0173592		-0.00992533	0.00333753	0.00294087	-0.0161689	0.00297845	5.67954e-08	HIVEP3	SVBP, HIVEP3
1	p36.32	rs2493291	2829384:3829384	CED	1.11801e-05	0.0220313	0.00501495	4.66973e-09	0.0261035	0.00445542	0.168845		0.0112476	0.0205224	0.00809527	0.27537	-0.00823346	0.00754811	0.00209696		0.0216128	0.00426319	3.98575e-07	0.0172312	0.00383686	7.09062e-06	PRDM16	PRDM16
4	q32.1	rs922888	155987119:156987119	CED	1.64316e-05	0.0150185	0.00348563	1.30667e-11	0.0208993	0.0030878	0.14217		0.00405687	0.0297112	0.010338	5.49054e-05	0.0389834	0.00966312	0.00575349		0.0165183	0.00330294	5.70085e-07	0.0225748	0.00294128	1.65237e-14	RP13-487K5.1, GUCY1A3
6	p21.32	rs1053924	31620715:32620715	CED	2.23598e-05	0.0157278	0.00370935	1.53314e-08	0.0186571	0.00329743	0.0604598	CED	0.00189619	-0.0350822	0.0112936	0.000133125	-0.0405363	0.0106086	0.0350371		0.0107803	0.00352413	0.00222086	0.0134421	0.00314883	1.96422e-05	PRRT1	ATF6B, LST1, HLA-DQA1, RNF5, CCHCR1, AGER, ATP6V1G2, HLA-DRB5, HLA-DQB1-AS1, HLA-C, AGPAT1, C4A, SLC44A4, TNXB, LIMS1, HLA-DQB1, DDAH2, HLA-DRB1, C4B, HLA-DQB2, PSMB9, TOM1, PPT2, PRRC2A, HLA-DQA2, CYP21A2, NOTCH4, HLA-B, EGFL8, HLA-DRB6, DHX30
12	q24.13	rs7953257	112184221:113184221	CED	2.35747e-05	-0.0151067	0.00357287	1.60211e-07	-0.0165623	0.00316036	0.214982		0.00193574	-0.026441	0.0085286	0.094311	-0.0133457	0.00797648	0.0939798		-0.0167989	0.00329538	3.4379e-07	-0.0161259	0.00293814	4.05474e-08	HECTD4	MAPKAPK5-AS1, TMEM116, PHETA1, ALDH2, SH2B3
8	p23.1	rs17708276	9699548:10699548	AED	2.38795e-05	-0.0161313	0.00381782	0.028248	-0.0074128	0.00337891	0.0266233		0.911945	0.00190344	0.0172122	0.0034771	-0.0471231	0.0161254	0.0115531		-0.0152856	0.00372723	4.11258e-05	-0.00908302	0.00330709	0.00602292	MSRA	FDFT1, MSRA, AF131215.2
15	q26.1	rs56340611	90907618:91907618	CED	2.40075e-05	-0.0239245	0.00566387	0.0213478	-0.0115373	0.00501232	0.10146		0.960677	-0.000929967	0.0188615	0.274245	-0.0193409	0.0176895	0.238238		-0.0220225	0.00542457	4.91208e-05	-0.0121173	0.00482247	0.0119821	RN7SL363P, FURIN	FES
10	q25.3	rs180940	115222411:116222411	CED	2.45397e-05	0.0155476	0.00368503	6.88432e-08	0.0176103	0.00326457	0.1777		0.497813	-0.00590649	0.00871234	0.0114906	-0.0204355	0.00808508	0.0172573		0.0122919	0.00339393	0.000292636	0.012277	0.00302712	4.99911e-05	NHLRC2, ADRB1	CASP7
5	q23.2	rs335210	122001864:123001864	AED	2.48189e-05	0.0150622	0.00357215	1.02253e-12	0.0225658	0.00316581	0.00112349	SSE_Female	0.552324	0.00497154	0.00836551	2.87865e-07	-0.0400693	0.00780721	1.00735e-05		0.013506	0.00328518	3.936e-05	0.0137211	0.00293379	2.91203e-06	PRDM6	PRDM6
12	q24.21	rs35443	115052878:116052878	CED	2.66194e-05	-0.0148626	0.00353811	3.48469e-11	-0.0208077	0.00314083	0.119983	CED	0.117867	0.015905	0.0101704	0.000268906	0.0341556	0.00937324	0.0127041		-0.011541	0.00334167	0.000553032	-0.0152593	0.00297808	2.99334e-07	RP11-25E2.1, RP11-116D17.2
1	p22.2	rs10493818	88833557:89833557	CED	2.70914e-05	0.0148961	0.00354943	2.02422e-10	0.0199878	0.00314281	0.144884		0.00084561	0.0278304	0.00833782	0.513796	0.00511835	0.00783886	0.00040911		0.0168805	0.00326582	2.3557e-07	0.0179286	0.00291709	7.94283e-10	GTF2B	KCNJ10, GTF2B, KYAT3, RBMXL1, GBP3
10	q25.3	rs1801253	115305056:116305056	AED	3.04186e-05	0.0163537	0.00392135	3.52943e-10	0.0218027	0.00347515	0.0760416	AED	8.26313e-05	-0.0363755	0.00923859	0.00524189	-0.023855	0.00854414	0.00615968		0.00830418	0.00360965	0.021417	0.0153217	0.00321907	1.93902e-06	ADRB1	VWA2, ADRB1
1	p36.22	rs11801879	11428819:12428819	CED	3.18457e-05	-0.0304963	0.00733089	1.01437e-07	-0.0345761	0.00649396	0.191705		0.318471	-0.0259941	0.0260559	0.000473962	-0.0860027	0.0246044	0.0186419		-0.0301661	0.0070569	1.91404e-05	-0.0379253	0.00627894	1.54046e-09	NPPB, RP5-934G17.6	NPPA, MTHFR, MFN2, PLOD1, NPPB, KIAA2013
5	q23.2	rs1428396	122131418:123131418	AED	3.55935e-05	-0.016094	0.00389262	0.023667	-0.00781269	0.00345311	7.08908e-05		0.0264809	-0.0193355	0.00871271	0.000315161	-0.029302	0.00813288	0.00438358		-0.0166334	0.00355404	2.86695e-06	-0.0110949	0.00317848	0.000481852	CTD-2347I17.1, CEP120	KRT8P33
15	q24.1	rs62006566	74586534:75586534	CED	3.7433e-05	-0.0152288	0.0036937	1.34798e-13	-0.0242443	0.00327541	0.0146944	CED	0.0036933	0.0267332	0.00920715	2.72775e-06	0.0398778	0.00850063	0.0134384		-0.00941155	0.00342812	0.00604381	-0.015955	0.00305637	1.78696e-07	CSK	FAM219B, SCAMP2, CSK, ULK3, MPI, PPCDC, SEMA7A, CCDC33, RPP25, CYP1A2
20	p12.2	rs2423514	10193337:11193337	SSE	4.25133e-05	-0.0141183	0.00344897	1.21834e-08	-0.0174862	0.00306916	0.00526001	CED	0.00103876	-0.0294275	0.00897117	1.53135e-06	-0.0404087	0.00840446	0.0714752		-0.0160897	0.00321926	5.79462e-07	-0.0201834	0.00288294	2.54187e-12	RP11-103J8.1
7	q32.2	rs11556924	129163496:130163496	CED	4.29107e-05	-0.0143249	0.00350127	0.188432	-0.00408138	0.00310315	0.00361493		0.00141245	0.0337895	0.0105841	0.76068	0.00299532	0.00983393	0.0165257		-0.00957901	0.00332411	0.00395565	-0.00344053	0.00295931	0.244987	ZC3HC1	DSC1, KLHDC10
20	q13.2	rs6021247	49608980:50608980	CED	4.41463e-05	-0.0141793	0.00347127	0.00128337	-0.00991743	0.00308021	0.2284		0.0711736	0.0157899	0.00875055	0.000866212	0.0271507	0.00815084	0.0165657		-0.0101045	0.00322666	0.00173886	-0.00528528	0.00288133	0.066607	NFATC2	NFATC2
7	p15.2	rs61056117	26745997:27745997	AED	4.85771e-05	0.0270355	0.00665491	1.80983e-13	0.0434473	0.005901	0.00317635	AED	0.920506	0.00166497	0.0166836	8.78005e-05	-0.0617308	0.0157374	0.00120561		0.0235529	0.00618129	0.000138773	0.0304822	0.00552534	3.45239e-08	HOTTIP
17	q21.31	rs71373532	42653235:43653235	CED	5.25324e-05	0.0262855	0.00649959	1.79772e-12	0.0407824	0.00578488	0.0481845		0.000402612	0.0425734	0.0120302	0.629138	0.00543852	0.0112612	0.000568887		0.0299656	0.00571837	1.60368e-07	0.0334029	0.00514565	8.49906e-11	NMT1	EFTUD2, DCAKD, HEXIM2, ACBD4, NMT1
1	p13.2	rs351364	112545061:113545061	AED	5.28766e-05	0.0160846	0.00397872	5.87751e-08	0.0191321	0.00352814	0.0191252		0.642832	-0.00394164	0.0084995	0.0239721	0.017945	0.00794844	0.0300006		0.012485	0.00360345	0.000530734	0.0189367	0.00322473	4.29701e-09	WNT2B	MOV10, RHOC, CTTNBP2NL, WNT2B
7		rs236607	74571121:75571121	CED	5.97408e-05	0.0139933	0.00348616	1.4639e-07	0.0162265	0.0030865	0.0627018		0.103549	0.0153741	0.00944384	0.00707797	0.023493	0.00872268	0.0512548		0.0141589	0.00327044	1.4955e-05	0.0170351	0.00290971	4.78268e-09
12	q24.12	rs4098854	111536797:112536797	CED	6.17942e-05	-0.0218876	0.00546376	0.00088012	-0.0159894	0.00480691	0.203282		0.0253661	-0.0283704	0.0126884	0.167047	-0.0163334	0.0118205	0.00688547		-0.0229016	0.00501828	5.02721e-06	-0.0160382	0.00445281	0.000315995	ATXN2	TMEM116, MAPKAPK5-AS1, PHETA1, NAA25, MAPKAPK5, SH2B3, ACAD10
19	p13.2	rs11671314	6758405:7758405	CED	6.42792e-05	0.0213557	0.00534341	9.60807e-10	0.0289134	0.00472742	0.0275806		0.0194064	0.0451663	0.0193201	0.00122273	0.0588874	0.0182099	0.102554		0.0230476	0.00515007	7.63381e-06	0.030806	0.00457574	1.66823e-11	INSR
3	q26.2	rs9850919	168677924:169677924	CED	7.30094e-05	0.0139007	0.00350464	1.65218e-11	0.0209332	0.00310845	0.126516	SSE_Female	0.0863926	0.0139649	0.00814365	8.38783e-05	0.0296899	0.00754789	0.0219488		0.0139107	0.00321919	1.55193e-05	0.022203	0.00287425	1.12027e-14	RP11-641D5.2
15	q25.1	rs62012629	78570351:79570351	AED	7.62107e-05	-0.013913	0.00351684	0.323976	-0.00308249	0.00312524	0.00157724		0.00623032	0.0225355	0.00823768	0.689679	-0.00305055	0.00763985	0.00678157		-0.00829397	0.00323442	0.0103388	-0.00307791	0.00289258	0.287296	ADAMTS7	ADAMTS7P3, ADAMTS7, TBC1D2B
20	p12.2	rs6074216	10453438:11453438	AED	7.81164e-05	-0.0334522	0.00846846	0.091942	-0.0126823	0.00752548	0.0363964		0.388754	-0.00916465	0.0106331	0.0596607	-0.018506	0.00982605	0.0926778		-0.0240259	0.00662429	0.00028681	-0.0148353	0.00597457	0.013025	RP11-103J8.1
1	p34.2	rs2782652	43426305:44426305	CED	8.34275e-05	0.0136454	0.00346818	2.86167e-09	0.0182732	0.00307648	0.0696382		0.512411	0.00551332	0.00841603	0.00476065	0.0221918	0.00786108	0.00397936		0.0124649	0.00320658	0.000101372	0.0187937	0.0028649	5.38184e-11	HYI-AS1, PTPRF	MPL, ST3GAL3, TIE1, ELOVL1, SZT2, HYI, CDC20, MED8
8	p23.1	rs10090444	10245469:11245469	SSE	8.38776e-05	-0.0139793	0.00355423	3.71049e-12	-0.0218974	0.00315149	5.11e-05	CED	1.11299e-07	-0.0437036	0.00823205	0.00216711	-0.0235545	0.00768105	3.39134e-07		-0.0186497	0.00326308	1.09474e-08	-0.0221362	0.00291562	3.14364e-14	RP11-177H2.2, XKR6	TDH, FAM86B3P, NEIL2, FDFT1, XKR6, AC087203.2, AF131215.5, RP11-148O21.3, CTSB, AC022239.1, CLDN23, PINX1, AF131215.2, PRAG1, BLK, SLC35G5, SOX7, RP1L1, AF131215.6, FAM66A, FAM86B1, FAM167A, MSRA
1	p13.2	rs57748895	115326169:116326169	CED	9.42084e-05	0.0535705	0.0137179	1.76749e-08	0.069204	0.0122842	0.195894		0.120595	0.0726411	0.0467947	0.933122	-0.00372297	0.0443644	0.116589		0.0550797	0.0131639	2.86248e-05	0.0640109	0.0118387	6.41262e-08	RP4-663N10.1
5	q23.2	rs1579036	122421103:123421103	AED	0.000107923	-0.0145909	0.00376816	0.0531721	-0.0064887	0.00335588	0.00226699		0.00607323	-0.0268818	0.00979638	0.298355	-0.00947734	0.00911296	0.0158684		-0.016175	0.00351696	4.24217e-06	-0.00684559	0.00314914	0.0297202	CSNK1G3	CSNK1G3
20	q13.33	rs4372964	62207527:63207527	AED	0.00011234	-0.0133616	0.00345944	6.71863e-08	-0.0166147	0.0030775	0.0351735		0.016046	-0.0196771	0.0081714	0.371241	-0.00674812	0.00754686	0.0255756		-0.0143215	0.00318571	6.93911e-06	-0.0152079	0.00284967	9.4639e-08	RGS19	TCEA2, LKAAEAR1, RGS19, OPRL1
16	p13.3	rs3211995	1589006:2589006	CED	0.000113346	-0.018346	0.00475262	1.7539e-09	-0.0252014	0.00418669	0.0918558		0.022382	-0.0312435	0.0136795	0.00477839	-0.0360353	0.0127703	0.00192088		-0.0197351	0.00448939	1.10291e-05	-0.0262528	0.00397834	4.14111e-11	SLC9A3R2	TSC2, NTHL1, SLC9A3R2, MIDN, RAB26, PKD1
10	q22.2	rs2177843	74909877:75909877	SSE	0.000125273	0.0188127	0.00490467	2.16474e-09	0.0260326	0.00434946	0.00878011		0.638648	0.00775092	0.0165055	0.000414165	0.0537391	0.0152181	0.0126793		0.0179152	0.00470149	0.000138666	0.0281249	0.00418201	1.75322e-11	SYNPO2L	FUT11, NDST2, CFAP70, FAM149B1, NUDT13, ECD, CHCHD1, MYOZ1, MRPS16, SYNPO2L
12	p12.2	rs7972957	19664203:20664203	CED	0.000125601	0.0153666	0.00400692	0.029783	0.00768529	0.00353675	0.11026		0.916848	0.000985004	0.0094343	0.00165505	-0.0277065	0.00880607	0.00101318		0.0131688	0.00368807	0.000356088	0.00276941	0.00328195	0.398763	RP11-405A12.2, RP11-664H17.1	LINC02398
6	p22.2	rs1321250	25142244:26142244	AED	0.000131447	0.0389951	0.0101979	0.109872	0.014585	0.0091226	0.00473754		0.90832	-0.00126392	0.0109755	0.031971	0.0219224	0.0102209	0.0610522		0.0203421	0.00747079	0.00647143	0.0178384	0.00680595	0.0087671	LRRC16A, SCGN	BTN3A2, HIST1H2BD
17	q21.32	rs4363897	46315947:47315947	CED	0.000132736	0.0373657	0.00977797	0.270297	0.00958031	0.00869054	0.029733		0.912994	0.00229031	0.0209613	0.0454963	0.0387772	0.0193875	0.0147571		0.0310973	0.00886127	0.000449211	0.0144653	0.00793026	0.0681416	CTD-2377D24.4, TTLL6
5	q33.3	rs2419923	157482779:158482779	CED	0.000150747	0.0143058	0.00377468	4.18545e-07	0.0169444	0.00334835	0.0585835		0.783664	0.00287614	0.0104758	0.000141691	0.0375681	0.00987164	0.000720713		0.0129924	0.00355118	0.000253591	0.0190723	0.00317091	1.80132e-09	RP11-32D16.1, EBF1
4	q24	rs13107325	102688709:103688709	CED	0.000156091	-0.0246697	0.0065242	4.20961e-08	-0.032051	0.00584652	0.0172747		0.00525519	-0.025823	0.0092515	0.277791	-0.0093981	0.00865935	0.0935186		-0.0250528	0.00533176	2.61728e-06	-0.024958	0.0048455	2.59441e-07	SLC39A8	SLC39A8
16	q23.1	rs11641308	74812023:75812023	CED	0.000164884	0.0138339	0.0036718	4.54434e-10	0.0202675	0.00325091	0.172423		0.870737	0.00154217	0.00947724	0.00988781	0.0229904	0.0089114	0.0127179		0.0122297	0.00342382	0.000354349	0.0205873	0.00305404	1.57286e-11	BCAR1, RNU6-758P	TMEM170A, AC009054.2, BCAR1, CFDP1, CHST6
2	q35	rs1250258	215800185:216800185	CED	0.000164908	-0.0147299	0.00390965	1.16836e-10	-0.0224212	0.00347952	0.0127329		0.00103649	0.0676518	0.0206202	0.43728	-0.015203	0.0195713	0.00178181		-0.0118711	0.00384122	0.00199849	-0.0222	0.0034258	9.1571e-11	FN1	ATIC, FN1
8	p23.1	rs7008695	9471963:10471963	CED	0.000178187	0.0217079	0.00579158	0.725228	-0.00180788	0.00514359	0.00239818		0.0266958	0.0197737	0.00892281	0.199026	0.0105914	0.00824647	0.0813717		0.0211346	0.00485796	1.35828e-05	0.0016649	0.00436424	0.702842	MSRA	MSRA
4	q32.1	rs17033041	155891307:156891307	CED	0.000183082	0.016334	0.00436578	5.71279e-10	0.0241145	0.00389039	0.0201195	CED	0.00189875	0.0321165	0.0103402	2.17903e-07	0.0499473	0.00963394	0.00111197		0.0187218	0.00402198	3.24189e-06	0.0277365	0.00360736	1.48469e-14	MTND1P22, RP13-487K5.1	GUCY1A1, AC104083.1
20	q13.33	rs4809361	61947662:62947662	CED	0.000193134	-0.0138792	0.00372304	0.150449	-0.00473821	0.00329511	0.0659787		0.16149	-0.0173577	0.0123973	0.224758	0.013947	0.0114885	0.0320038		-0.014167	0.00356572	7.09435e-05	-0.00331792	0.0031674	0.29486	RP4-583P15.11	RIN1
2	q32.1	rs12693302	182711443:183711443	CED	0.000195615	-0.0190132	0.00510464	0.0026393	-0.0136603	0.00454293	0.0204638		0.610011	-0.00415155	0.00813925	0.00170092	-0.0238783	0.00760872	0.00791135		-0.0148178	0.00432452	0.000611493	-0.0163456	0.00390057	2.78242e-05	PDE1A
11	p15.4	rs10840457	10175738:11175738	CED	0.000208033	0.0141611	0.00381789	4.65702e-09	0.019781	0.00337602	0.047458		0.00370919	0.0290947	0.0100251	0.790897	0.00246332	0.00929032	0.0256802		0.0160526	0.00356791	6.82199e-06	0.0177609	0.00317301	2.17474e-08	MRVI1	AMPD3, RNF141, MRVI1
3	p21.1	rs3821843	53058012:54058012	CED	0.000211149	-0.014591	0.00393779	8.10374e-08	-0.0187651	0.00349768	0.0775021		0.397428	0.00793638	0.00937841	0.0858959	0.014989	0.00872719	0.0166112		-0.0112147	0.00363073	0.00200946	-0.0140937	0.00324664	1.41827e-05	CACNA1D	TKT
8	q11.21	rs2219210	51409244:52409244	CED	0.000212811	0.016753	0.00452369	5.49221e-09	0.0233044	0.00399609	0.0497849	CED	0.000588148	0.034934	0.0101626	0.0162552	0.0230574	0.00959422	0.02495		0.0197597	0.00413275	1.74214e-06	0.0232679	0.0036889	2.83516e-10	RP11-139G7.1, SNORA7
6	p21.32	rs1617322	32173893:33173893	CED	0.00023771	0.0127781	0.00347682	0.10197	0.00504874	0.00308719	0.0463541		0.00540781	-0.0224899	0.00808426	0.312348	-0.00762076	0.00754289	0.0315048		0.00727307	0.00319396	0.0227785	0.00323093	0.00285715	0.258129	HLA-DQB1, MTCO3P1	ATF6B, HLA-DQA1, HLA-H, HLA-G, RNF5, HLA-DRB5, TUBB, BTN3A2, HLA-DQB1-AS1, HLA-C, HLA-DMA, C4A, TNXA, IER3, CYP21A1P, HLA-DRB6, TNXB, HLA-DQB1, HLA-DRA, HLA-DPB2, C4B, HLA-DRB1, HLA-DQB2, PSMB9, CYP21A2, PBX2, NOTCH4, VARS2, SKIV2L, HLA-DPB1, TAP2, FLOT1
12	q24.31	rs28625019	123407563:124407563	CED	0.000250177	0.0146963	0.00401301	0.0284138	0.00780329	0.00356064	0.0289507		0.966875	0.000729119	0.0175573	0.060077	0.0305788	0.0162628	0.0277332		0.0140028	0.00391212	0.000344452	0.00884512	0.00347825	0.0109911	RILPL2	ABCB9, PITPNM2, ARL6IP4, KMT5A, MPHOSPH9, C12orf65, CDK2AP1, SBNO1, EIF2B1
3	p25.1	rs13062241	14423230:15423230	CED	0.000255174	-0.0126719	0.00346501	6.02809e-09	-0.0178604	0.00307077	0.177892		0.0208028	0.0199939	0.00864898	0.000786393	0.02711	0.00807359	0.0533539		-0.0081541	0.00321649	0.0112416	-0.012177	0.00287017	2.20952e-05	FGD5	FGD5
14	q21.3	rs72681869	50155357:51155357	CED	0.000317258	-0.0598338	0.0166165	2.89304e-08	-0.0808088	0.0145653	0.342496		2.61276e-05	-0.0929666	0.022105	0.340325	-0.0194312	0.0203781	0.0048406		-0.0717964	0.0132823	6.46588e-08	-0.0600552	0.0118497	4.01817e-07	SOS2
5	p13.3	rs2859814	32172781:33172781	CED	0.000331772	-0.0150928	0.00420504	1.75744e-08	-0.0210668	0.00373885	0.189916		0.331298	-0.0127056	0.0130781	0.00525479	-0.0340688	0.0122059	0.0190603		-0.0148691	0.0040032	0.000203756	-0.0221821	0.0035749	5.47078e-10	CTD-2004A9.1, NPR3
7	q32.3	rs12154627	129922934:130922934	CED	0.000371124	-0.0123054	0.00345669	0.0746102	-0.00546058	0.00306281	0.118552		0.409776	-0.00678585	0.00823223	0.0118445	0.0193231	0.00767738	0.00353919		-0.0114781	0.00318712	0.000316513	-0.00205776	0.00284479	0.469469	KLF14, RP11-36B6.1	COPG2
10	q21.3	rs11527181	64046164:65046164	CED	0.000415405	-0.0124442	0.00352509	1.17516e-12	-0.0222598	0.00313131	0.0204735	SSE_Female	0.79727	-0.00209239	0.00814525	0.000179825	-0.0284683	0.00759918	0.00391341		-0.0108112	0.00323512	0.000832309	-0.0231609	0.00289515	1.24517e-15	ALDH7A1P4, RP11-436D10.3	EGR2, ADO
17	q23.3	rs6504213	61881714:62881714	CED	0.000463203	0.0123024	0.00351372	1.30951e-11	0.0211028	0.00311802	0.00915359	AED	0.265575	-0.00906535	0.0081425	0.00196755	-0.0235098	0.00759521	0.0154294		0.00894801	0.00322615	0.00554425	0.0146686	0.00288442	3.66759e-07	TEX2, RPL31P57	TEX2
5	p13.3	rs3860752	32614977:33614977	CED	0.000479072	-0.0140439	0.00402142	3.23268e-08	-0.0196943	0.00356228	0.00593051		0.0147272	0.0219757	0.00900937	0.873476	0.0013394	0.00841084	0.0146602		-0.00805973	0.00367221	0.0281784	-0.0164951	0.0032802	4.93852e-07	CTD-2066L21.3
10	q23.33	rs7101207	95622857:96622857	CED	0.000479919	-0.0235215	0.00673621	7.77953e-10	-0.0369575	0.00600966	0.0353453		0.55334	-0.00768265	0.0129606	0.00246302	-0.0365649	0.0120752	0.0230374		-0.0201529	0.0059771	0.000747119	-0.0368796	0.00538017	7.14544e-12	NOC3L, TBC1D12	NOC3L, PDLIM1, PLCE1, TBC1D12, HELLS
6	p21.33	rs3099840	30930721:31930721	AED	0.000491549	-0.0411359	0.0118024	0.95107	-0.00063952	0.0104218	0.00104469		9.08204e-06	0.206159	0.0464432	0.404356	0.0369304	0.0442876	0.00418204		-0.0261344	0.0114388	0.0223295	0.00133179	0.0101447	0.895555	XXbac-BPG181B23.6	ATF6B, LINC00243, HLA-DQA1, HLA-H, HLA-G, RNF5, CCHCR1, HLA-S, TUBB, BTN3A2, GPANK1, POU5F1, HLA-C, HCP5, HCG22, C4A, TNXA, IER3, CYP21A1P, PSORS1C3, MICB, HLA-DQB1, BAG6, C4B, HLA-DRB1, PSMB9, HLA-DQA2, CYP21A2, VARS2, SKIV2L, HLA-DPB1, APOM, FLOT1, AGER, B2M
18	q11.2	rs11664194	19521031:20521031	AED	0.000526892	-0.0124624	0.00359481	0.175537	-0.00432264	0.00319101	0.0030679		0.000815527	0.0272544	0.0081407	0.0184047	-0.0177955	0.00754849	2.47602e-05		-0.00598149	0.00328846	0.0689214	-0.00636528	0.00293918	0.0303367	RP11-863N1.4, RPS4XP18
17	p13.3	rs6503187	1449098:2449098	CED	0.000564216	-0.0137159	0.00397756	2.15704e-10	-0.0223875	0.00352555	0.0108783	CED	5.30662e-05	0.0365661	0.00904553	0.0848107	0.0145365	0.00843436	0.0373601		-0.00556873	0.00364109	0.126162	-0.0168956	0.00325281	2.05659e-07	RP11-667K14.3, MIR132	HIC1, DPH1, SRR, SGSM2
17	q21.32	rs79553110	45175925:46175925	CED	0.000582243	0.0291799	0.00848297	5.08216e-09	0.0441817	0.00755922	0.029226		0.00347808	0.0472661	0.0161744	0.0161389	0.0364157	0.0151361	0.109103		0.0330816	0.00751245	1.06483e-05	0.0426314	0.00676275	2.9033e-10	NPEPPS	HOXB2, RPRML, TBKBP1, SCRN2, COPZ2, EFCAB13, TBX21, SKAP1
8	p23.1	rs7006985	9064437:10064437	CED	0.000639051	0.012266	0.00359227	1.43123e-08	0.0180537	0.00318414	0.00364217	CED	0.00874522	0.0227925	0.00869254	0.000785537	0.0270172	0.00804524	0.00433223		0.0138015	0.00331994	3.22241e-05	0.0192676	0.00296069	7.62535e-11	TNKS	TDH, TNKS, FAM86B3P, FDFT1, FAM66A, CLDN23, MFHAS1, FAM167A, BLK, MSRA
5	q33.3	rs7701003	157324481:158324481	SSE	0.000645738	-0.011878	0.00348154	4.69985e-14	-0.0233039	0.00309046	0.00220717	SSE_Female	0.664695	0.00369739	0.0085302	5.95959e-06	-0.0360335	0.0079569	3.79496e-05	SSE	-0.00965393	0.0032234	0.00274487	-0.0249725	0.0028808	4.37451e-18	CTC-436K13.2, RP11-542A14.1
11	q13.3	rs72930288	68565991:69565991	CED	0.000659207	-0.018938	0.00556006	3.04115e-08	-0.0273066	0.00492961	0.082385		0.741398	-0.00360837	0.0109342	0.0216489	0.023437	0.0102051	0.0335759		-0.0157885	0.0049561	0.00144416	-0.0177062	0.00443886	6.63766e-05	MYEOV
11	p15.1	rs5219	16909572:17909572	CED	0.000667877	-0.0121118	0.00355968	9.01882e-07	-0.0154839	0.0031522	0.0326048		0.216382	-0.0101223	0.00818795	0.000709116	-0.0258829	0.00764328	0.0797031		-0.0117955	0.00326452	0.000302374	-0.0169955	0.0029141	5.47142e-09	KCNJ11	AC124798.1, ABCC8, NUCB2, PIK3C2A, NCR3LG1, OR7E14P, KCNJ11
9	q34.2	rs10993958	136035677:137035677	CED	0.000690945	-0.0223089	0.00657458	4.67953e-07	-0.0294405	0.00584231	0.107923		0.113946	-0.0239213	0.0151328	0.0133571	-0.0349719	0.0141344	0.21383		-0.0225649	0.00603006	0.000182511	-0.0302476	0.00539926	2.11666e-08	SARDH
12	q13.12	rs7302981	50037815:51037815	CED	0.000742711	-0.0135698	0.00402263	9.75441e-08	-0.0189758	0.00355921	0.166911		0.000202097	0.0313038	0.00842183	0.0292624	0.0169919	0.00779435	0.0260422		-0.00523396	0.00362982	0.149321	-0.0127699	0.00323763	8.00634e-05	CERS5	AC074032.1, COX14, DIP2B, ATF1, CERS5, LIMA1, SMARCD1
3	p14.3	rs11926924	57299360:58299360	AED	0.000830938	-0.0118236	0.00353752	0.0246495	-0.00705131	0.00313828	0.0354367		0.0275885	0.0180177	0.00817785	0.218232	0.00936279	0.0076042	0.0208136		-0.00711987	0.00324677	0.0283141	-0.00466247	0.00290094	0.108004	SLMAP	FLNB, DENND6A, SLMAP, ARF4
4	q21.21	rs56190605	80662062:81662062	CED	0.000887028	-0.0159882	0.00480967	2.71844e-05	-0.017933	0.00427387	0.114189		0.113821	-0.0179002	0.0113198	0.0172966	-0.0249569	0.010484	0.0232537		-0.0162806	0.00442666	0.000235211	-0.0189339	0.00395765	1.71732e-06	PRDM8, FGF5	PRDM8
20	q13.33	rs8118848	61961572:62961572	CED	0.000900225	-0.0183134	0.00551599	5.6892e-07	-0.0243869	0.00487577	0.0783999		0.0282286	-0.0179366	0.00817444	0.88237	-0.00111877	0.00756095	0.0440562		-0.0181955	0.00457238	6.90771e-05	-0.0175528	0.00409765	1.83865e-05	ZBTB46	OPRL1, TPD52L2, UCKL1, ZBTB46
6	p21.1	rs9394951	42850753:43850753	AED	0.000985649	0.0121653	0.00369244	4.35561e-07	0.0165611	0.00327754	0.0465967		0.280911	0.00966224	0.00896062	3.24934e-05	0.0345881	0.00832277	0.0188696		0.011802	0.00341395	0.000546254	0.0189814	0.00304959	4.83875e-10	ZNF318, ABCC10	SLC22A7, CRIP3, PEX6, DNPH1, MAD2L1BP, PTK7
8	p23.1	rs907183	8229761:9229761	CED	0.000990343	0.011496	0.0034907	2.41923e-12	0.0216793	0.00309334	0.000318484		0.000686253	0.0279901	0.00824335	5.91934e-06	0.034793	0.00768055	0.0051727		0.0140039	0.00321438	1.32069e-05	0.0235096	0.00286937	2.54169e-16	MFHAS1	TDH, FAM86B3P, NEIL2, FDFT1, XKR6, FAM85B, RPL10P19, CLDN23, PRAG1, BLK, FAM66D, MFHAS1, AC103957.2, RP1L1, ALG1L13P, FAM66A, FAM167A, ERI1, MSRA
8	q22.1	rs74900445	94768903:95768903	CED	0.00103027	0.0174987	0.00533141	8.82188e-09	0.0270426	0.00470124	0.179378		0.0123072	0.0202293	0.00808071	0.0674481	-0.0138318	0.00756359	0.000950724		0.0183268	0.00445012	3.81705e-05	0.0156519	0.0039928	8.85387e-05	GEM	RAD54B
3	p21.31	rs6442105	47682326:48682326	CED	0.00106259	0.011909	0.00363805	4.57392e-07	0.0163139	0.0032346	0.0209164		0.00714376	-0.0219337	0.00815284	0.712753	-0.00278939	0.0075765	0.0292302		0.0062892	0.00332229	0.0583534	0.0133688	0.00297484	6.99082e-06	RP11-1029M24.1, CDC25A	MAP4, MRPS18AP1, SPINK8, ZNF589, WDR6, QRICH1, NME6, CDC25A, TREX1, NCKIPSD, CSPG5, FCF1P2, SHISA5, DHX30
3	q25.32	rs699920	157447175:158447175	CED	0.00107477	0.0117873	0.00360441	2.67238e-07	0.0164596	0.0031989	0.0660253		0.259363	0.0092901	0.00823645	0.00175331	-0.0240955	0.00769975	9.28218e-06		0.0113859	0.00330206	0.000564494	0.01049	0.0029541	0.000383757	RSRC1
11	p15.5	rs73413011	1441481:2441481	CED	0.00123006	-0.0132614	0.00410332	1.1772e-08	-0.0207303	0.00363482	0.0313712	SSE_Female	0.398646	-0.0111213	0.013176	0.00317353	-0.0363347	0.0123142	0.0209206		-0.0130722	0.00391774	0.000847883	-0.0219809	0.00348612	2.87715e-10	AC051649.1	LSP1, TNNT3
6	p22.3	rs2504808	21924253:22924253	CED	0.0012459	-0.0124177	0.00384661	4.45421e-05	-0.0139272	0.00341131	0.0356727		0.0551548	0.0166802	0.00869781	0.00111781	0.0263103	0.00807224	0.0178797		-0.00765758	0.00351794	0.029501	-0.00783011	0.00314224	0.0127068	RP3-404K8.2, HDGFL1
11	q13.1	rs10750766	64973798:65973798	SSE	0.00134887	-0.0136368	0.00425429	3.06008e-11	-0.0250903	0.00377636	0.00204949		0.00194069	-0.0252784	0.00815558	0.201881	-0.00967849	0.00758361	0.0535563		-0.016127	0.00377194	1.90695e-05	-0.022028	0.00338043	7.2044e-11	RN7SL309P, KAT5	EFEMP2, RNASEH2C, SNX32, OVOL1, LTBP3, PCNX3, FIBP, KCNK7, SIPA1, POLA2, CTSW, MAP3K11, SPDYC
7	p12.3	rs10260816	45510100:46510100	CED	0.00137801	-0.0112671	0.00352176	1.76275e-09	-0.0187715	0.00311892	0.0125025		0.000360356	-0.0309761	0.00868147	0.203789	-0.0103157	0.00811711	0.00197122		-0.0140522	0.00326346	1.66301e-05	-0.0176837	0.0029114	1.24798e-09	AC073115.6	IGFBP3
20	q13.33	rs6011210	62029923:63029923	CED	0.00174093	0.0108172	0.0034546	0.000174418	0.0115146	0.00306767	0.18524		0.294633	0.0157147	0.0149944	0.00463447	0.0395337	0.0139616	0.0745574		0.0110641	0.00336641	0.00101403	0.012805	0.0029962	1.92212e-05	DNAJC5	UCKL1, DNAJC5, TPD52L2
7	p22.3	rs12699561	1518418:2518418	CED	0.0019598	0.0110489	0.00356841	1.72499e-08	0.0178182	0.00316049	0.00652409		0.00184377	-0.0261567	0.0083979	0.729224	-0.00272345	0.00786757	0.00302402		0.00535866	0.00328422	0.102755	0.014964	0.00293271	3.3531e-07	MAD1L1	MRM2, TONSL, AC104129.1, MAD1L1, PDE4DIP, STARD3
5	q14.3	rs34712971	86801956:87801956	CED	0.00196186	-0.0142529	0.00460367	1.61338e-08	-0.0230304	0.00407667	0.152658		5.22445e-07	-0.0528643	0.0105322	0.0434229	-0.0198355	0.00982103	0.00160723		-0.0204466	0.0042183	1.25263e-06	-0.0225608	0.00376518	2.07317e-09	CTD-2316B1.2, TMEM161B	MEF2C
14	q11.2	rs440466	23374117:24374117	CED	0.00198794	-0.0110162	0.0035627	1.01983e-08	-0.0181039	0.00316078	0.0130668		0.968936	0.00032631	0.00837924	0.0405288	-0.01604	0.00783049	0.00663538		-0.00927964	0.00327865	0.00465007	-0.0178147	0.00293101	1.21671e-09	MYH6
10	q11.21	rs61852531	44839894:45839894	AED	0.00200812	0.0111149	0.00359812	0.407608	0.00264394	0.00319273	0.00744053		0.0301707	-0.019915	0.009186	0.955011	-0.000484997	0.00859683	0.0168762		0.00698738	0.00335028	0.0370138	0.00226469	0.00299299	0.449251	TMEM72-AS1
13	q34	rs66656189	110407856:111407856	AED	0.00200897	-0.0135433	0.00438441	0.0464347	-0.00774998	0.00389166	0.104091		0.781312	-0.00301551	0.0108623	0.0083296	-0.0268241	0.0101661	0.0174962		-0.0120684	0.00406571	0.00299415	-0.0101879	0.00363446	0.00506087	COL4A1	COL4A1
4	p11	rs13109500	48323980:49323980	CED	0.00205332	0.0106719	0.00346215	1.57136e-08	0.0173078	0.00306125	0.00827875		0.475959	0.00735089	0.0103123	0.00919495	0.0250231	0.00960625	0.00143877		0.0103355	0.00328212	0.00163812	0.0180191	0.00291673	6.49869e-10	OCIAD1	ZAR1, OCIAD1, OCIAD2, SLC10A4, SPATA18, NFXL1, FRYL
13	q34	rs9521634	110333899:111333899	AED	0.00212442	-0.0139172	0.00452989	0.0649216	0.00743222	0.00402654	0.000427401		0.688953	0.00633167	0.015818	0.117635	0.0231319	0.0147824	0.0245001		-0.0123824	0.00435484	0.00446384	0.0085166	0.003885	0.0283667	COL4A1	COL4A1
19	p13.3	rs8101970	1335625:2335625	CED	0.0022061	-0.0132441	0.00432667	2.51304e-07	-0.0197169	0.00382338	0.053405		0.00161759	0.0736229	0.0233494	0.168416	-0.0302324	0.0219498	0.000596072		-0.0103604	0.00425425	0.0148791	-0.0200266	0.00376666	1.05615e-07	REXO1	REXO1, KLF16, SCAMP4, ATP8B3
1	q43	rs7535162	242925689:243925689	AED	0.00238336	0.0119496	0.00393362	0.157906	0.00495423	0.00350827	0.0100867		0.000927383	0.0370599	0.0111892	0.555817	0.00611249	0.0103765	0.0212802		0.0147116	0.00371098	7.35937e-05	0.00507305	0.00332346	0.126901	SDCCAG8	CEP170, SDCCAG8
3	p22.1	rs7632387	41353161:42353161	CED	0.0026169	-0.0143223	0.00475897	6.47621e-07	-0.0210002	0.00421977	0.0149553		0.0866444	-0.0142622	0.00832372	0.024497	-0.0174536	0.00775939	0.0325187		-0.0143075	0.0041314	0.000533963	-0.0201907	0.00370705	5.13505e-08	ULK4	RPL36P20, ULK4
6	q27	rs9294987	169220237:170220237	CED	0.00270617	0.0104199	0.00347407	8.27549e-10	0.0189252	0.00308235	0.0415824		0.0515774	-0.021729	0.0111617	0.111126	-0.0165377	0.0103802	0.0057518		0.00758051	0.00331711	0.0222967	0.0160516	0.00295483	5.56241e-08	XXyac-YX65C7_A.4, RP1-137D17.1
12	q24.31	rs7953894	122904966:123904966	AED	0.0029194	0.0103265	0.00346976	0.95048	-0.000190726	0.00307106	0.0232226		0.57653	0.00667354	0.0119497	0.0624664	0.0206952	0.0111083	0.192445		0.0100425	0.00333213	0.00257978	0.0012923	0.00296002	0.662413	VPS37B, ABCB9	ABCB9, PITPNM2, ARL6IP4, RILPL2, KMT5A, MPHOSPH9, VPS37B, CDK2AP1, DDX55
18	q21.2	rs11876341	48299991:49299991	CED	0.00292156	0.0111497	0.00374664	0.333469	0.00321361	0.00332275	0.102242		0.632951	-0.00412671	0.0086408	0.000115802	0.0310567	0.00805553	0.000665917		0.00873214	0.00343742	0.0110752	0.00726204	0.0030717	0.0180702	MEX3C, RNU1-46P	ME2
18	q12.3	rs7236548	42597750:43597750	CED	0.00302867	0.0132758	0.0044777	4.66394e-08	0.0216776	0.00396743	0.00939858		0.60373	0.00767789	0.0147922	0.00930983	0.0363318	0.0139705	0.0248569		0.0128059	0.00428565	0.00280728	0.0227712	0.00381652	2.424e-09	RP11-749H17.2
6	q25.1	rs57139556	150498511:151498511	CED	0.00306978	-0.019822	0.00669503	4.35507e-11	-0.0390548	0.0059247	0.0117667	CED	0.000901918	-0.0514665	0.0155025	0.00522603	-0.040788	0.0146039	0.067115		-0.0247963	0.00614634	5.47629e-05	-0.0392997	0.0054901	8.16893e-13	PLEKHG1
5	q12.1	rs13163533	61092576:62092576	CED	0.00328046	0.0203635	0.00692589	1.83278e-10	0.0392837	0.00616205	0.00246707		0.00784328	0.106069	0.0398908	0.663351	-0.0156793	0.0360198	0.0117494		0.0228714	0.0068238	0.000803131	0.0377209	0.00607381	5.28459e-10	RN7SKP157, KIF2A
11	q12.2	rs7931683	60763581:61763581	CED	0.0033122	-0.029131	0.00991789	1.36555e-05	-0.0384593	0.00884234	0.0374207		0.562036	-0.013329	0.0229878	0.0520052	-0.0422414	0.0217385	0.0559808		-0.0266512	0.00910649	0.00342673	-0.0389962	0.00819068	1.92588e-06	PPP1R32, RP11-286N22.10	SYT7
19	p13.11	rs12977269	16715648:17715648	CED	0.00336432	-0.0114775	0.00391407	3.40278e-08	-0.0191894	0.00347662	0.0417237		0.562903	0.0221114	0.0382191	0.0381842	0.0706445	0.0340791	0.0265653		-0.0111289	0.0038937	0.00426091	-0.0182641	0.00345867	1.2871e-07	MYO9B	HAUS8, MYO9B
20	p12.2	rs889509	10124190:11124190	CED	0.00377733	-0.0101679	0.00351074	0.754012	0.000974086	0.00310858	0.0174969		0.994252	-5.99116e-05	0.00831616	0.000572442	-0.0267516	0.00776605	0.00622717		-0.00863896	0.00323434	0.00756233	-0.00285473	0.00288597	0.322577	JAG1	SLX4IP, MKKS
11	q22.1	rs35165060	99934951:100934951	CED	0.00386792	0.0105939	0.00366724	1.06862e-09	0.0198585	0.00325595	0.0269411		0.84564	-0.0016099	0.00826919	0.00244577	0.0234682	0.00774473	0.00287465		0.00858818	0.00335236	0.0104123	0.0204007	0.00300149	1.06934e-11	CNTN5, RN7SL222P
20	p12.2	rs78845099	10243612:11243612	CED	0.00386988	0.0106255	0.00367839	4.32624e-05	0.0133403	0.00326215	0.0428355		0.393929	0.00823081	0.00965457	0.00358083	0.0262674	0.00901693	0.0668632		0.0103219	0.00343736	0.00267443	0.0148364	0.00306757	1.32116e-06	RP1-278O22.2
7	q36.1	rs891511	150204843:151204843	SSE	0.00392279	-0.0107956	0.0037428	8.47606e-16	-0.0266165	0.00330728	0.00153723		0.534533	0.00517536	0.00833241	0.000696593	0.026333	0.00776496	0.0316113		-0.00811419	0.00341418	0.0174722	-0.0184859	0.00304278	1.23739e-09	NOS3	NOS3, AGAP3, TMEM176A, ATG9B
5	q31.2	rs41298968	136534169:137534169	AED	0.00406475	-0.0101263	0.00352447	0.223457	-0.00381294	0.00313206	0.048453		0.63073	0.014386	0.0299268	0.051763	-0.0530003	0.0272471	0.0479571		-0.00979097	0.00350028	0.00515481	-0.0044544	0.00311157	0.152269	KLHL3	PKD2L2, HNRNPA0, KLHL3, KDM3B
16	q12.2	rs55872725	53309123:54309123	CED	0.00419456	0.00989582	0.00345622	8.98234e-05	0.0119737	0.00305713	0.219293		0.0128433	0.0203577	0.00818142	0.454263	0.00571119	0.00763187	0.020597		0.0114801	0.00318378	0.000311178	0.0111078	0.00283791	9.07557e-05	FTO
12	q24.21	rs7964325	114868787:115868787	CED	0.00434864	-0.0106988	0.00375168	5.40637e-07	-0.0167111	0.00333456	0.167023		0.140328	-0.0139025	0.00942783	0.0299499	-0.0191702	0.00883072	0.0890589		-0.0111368	0.00348582	0.00139892	-0.017018	0.00311956	4.89047e-08	RP4-601P9.1, RP11-25E2.1
3	p21.31	rs143311886	49121367:50121367	CED	0.00435748	-0.0141575	0.00496564	3.70192e-08	-0.0241969	0.00439565	0.104291		0.0343402	-0.0182519	0.00862495	2.4999e-05	-0.0338156	0.00802188	0.0160734		-0.0151768	0.00430339	0.00042076	-0.0264181	0.00385486	7.22225e-12	BSN	APEH, WDR53, HYAL3, WDR6, DALRD3, AMT, USP19, IP6K2, UBA7, GPX1, GMPPB, P4HTM, KLHDC8B, DCUN1D1, NICN1, LAMB2, CRBN, RBM6
3	p24.1	rs2643826	27062988:28062988	CED	0.0044842	0.00987807	0.00347579	1.30042e-11	0.0208332	0.00307773	0.00850643		0.000117884	0.0315202	0.00818461	0.0139716	0.0187331	0.00762086	0.0142063		0.0131848	0.00319925	3.76874e-05	0.0205387	0.00285379	6.15553e-13	RNU1-96P, AC137675.1	NEK10, SLC4A7
10	p12.31	rs7923191	18227901:19227901	CED	0.00452151	0.0122578	0.00431715	1.44692e-10	0.0245328	0.00382653	0.00625801		0.00214129	0.0264573	0.0086173	0.299084	0.00834623	0.00803746	0.0353406		0.0151067	0.00385985	9.08572e-05	0.0215419	0.00345496	4.51609e-10	CACNB2
12	q24.31	rs58609847	121391994:122391994	CED	0.00466699	-0.0100106	0.00353833	0.0982563	-0.0051889	0.00313837	0.128548		0.0466611	-0.0166326	0.00836032	0.31963	-0.00776269	0.00779985	0.0627229		-0.0110166	0.00325851	0.000722593	-0.00554753	0.00291153	0.0567323	KDM2B	AC048337.1, ANAPC5, RNF34, MORN3, KDM2B
2	q24.3	rs6727986	164480159:165480159	AED	0.00478193	-0.0102388	0.00362895	4.56181e-11	-0.0212492	0.00322692	0.0210415	SSE_Male	1.76326e-05	-0.0405386	0.00944104	9.67643e-06	-0.0387845	0.00876484	0.0101042		-0.0141393	0.00338733	2.9909e-05	-0.0233423	0.00302821	1.27506e-14	AC092684.1
1	p13.2	rs12126684	112723233:113723233	CED	0.00481357	0.0120274	0.00426612	8.31292e-07	0.0186202	0.00377842	0.0374557		0.671485	-0.00431015	0.0101627	0.0149514	0.0230567	0.00947397	0.0150719		0.00957976	0.00393359	0.0148765	0.019229	0.0035096	4.27787e-08	MOV10	MOV10, ST7L, WNT2B
6	p22.2	rs1155207	25828365:26828365	CED	0.0052741	0.0123535	0.00442805	0.14395	0.0057458	0.00393213	0.12098		0.00284336	-0.0253104	0.00848057	0.617028	0.0039703	0.00793947	0.0038463		0.00428491	0.0039252	0.274991	0.00539608	0.00352365	0.125674	HIST1H3PS1, RNU6-1259P	BTN3A2, HIST1H4H, HIST1H3E, BTN3A1, HIST1H2BK, HIST1H4E, HIST1H2AE, BTN2A1, HIST1H4C, HIST1H2BD, B4GAT1, SLC17A3
8	q24.3	rs145183312	143517469:144517469	CED	0.00544584	-0.00970877	0.00349306	4.05324e-07	-0.0156858	0.0030959	0.0849184		0.00269082	0.027069	0.00901894	0.0939623	0.0140314	0.0083774	0.0163277		-0.00491158	0.00325729	0.131587	-0.012115	0.00290395	3.02067e-05	CYP11B2, RP11-273G15.2	LY6D, LY6E, GML, LYNX1, THEM6, LYPD2
8	q24.3	rs10096038	140595080:141595080	CED	0.00565436	-0.0104838	0.00378857	1.87168e-08	-0.0189473	0.00336918	0.0141058		0.00214253	0.0258892	0.00843273	0.574477	0.00440517	0.00784569	0.0120027		-0.00437515	0.00345582	0.205505	-0.0153114	0.0030958	7.58132e-07	TRAPPC9	TRAPPC9
7	q11.23	rs587650617	73739332:74739332	CED	0.00603873	0.0109953	0.00400456	6.4476e-05	0.0142105	0.00355628	0.0839307		0.00770938	-0.211334	0.0793066	0.865691	-0.0122024	0.0721452	0.0104042		0.0104299	0.00399946	0.0091122	0.0141465	0.00355197	6.81322e-05	GTF2IRD2
5	q35.2	rs72812818	172856752:173856752	CED	0.00627236	-0.0102683	0.00375684	3.11851e-10	-0.0209509	0.00332917	0.0272003		0.00551774	0.0232214	0.00836682	0.179587	0.0104692	0.00780083	0.0852081		-0.00464916	0.0034272	0.174926	-0.0161099	0.00306198	1.43057e-07	CPEB4	C5orf47, CPEB4, NSG2
1	p13.2	rs146401699	112629988:113629988	CED	0.0064452	-0.0285411	0.0104766	9.30033e-05	-0.0362243	0.00926868	0.264402		0.0665088	0.117526	0.0640445	0.853203	0.0115459	0.0623988	0.117961		-0.0247343	0.0103392	0.0167437	-0.0351931	0.00916809	0.000123714	ST7L	CAPZA1, RHOC, ST7L
7	q21.13	rs39239	89254827:90254827	AED	0.00646834	0.0134012	0.00492135	0.539074	0.00266854	0.00434463	0.10207		0.0321827	0.0214968	0.0100346	0.0836309	-0.0160924	0.0093017	0.00266212		0.0149709	0.00441856	0.000703579	-0.000691389	0.00393641	0.860577	DPY19L2P4	DPY19L2P2, AC002064.1, STEAP2-AS1, DPY19L2, CFAP69, STEAP1, STEAP2, DPY19L2P4, GTPBP10
4	p14	rs4488948	37827029:38827029	SSE	0.00692537	-0.00950288	0.003519	1.58587e-08	-0.0176027	0.00311427	0.00131709		0.583152	0.00471294	0.00858782	0.021639	-0.0184454	0.00803108	0.0218063		-0.00745909	0.00325623	0.0219799	-0.0177129	0.0029036	1.05869e-09	RP11-600L4.1, RP11-83C7.1	LINC02513
15	q15.1	rs8038764	41407905:42407905	CED	0.00710681	-0.00939738	0.00349107	0.000260326	-0.0113037	0.00309526	0.020551		0.888391	-0.00121398	0.00865022	0.00356098	0.0232238	0.00796735	0.0188553		-0.00825117	0.00323736	0.0108115	-0.00677593	0.00288518	0.0188477	RP11-380D11.2, MGA	GCHFR, MAPKBP1, PLA2G4B, JMJD7-PLA2G4B, RPAP1, JMJD7, TYRO3
8	p23.1	rs2980423	7642575:8642575	CED	0.00715327	0.00929991	0.00345765	9.74688e-09	0.0176141	0.00307115	0.0196044		0.408546	0.00906462	0.0109679	0.000245873	0.0369097	0.0100656	0.00942806		0.00927864	0.00329766	0.00489748	0.0192574	0.00293746	5.53428e-11	FAM86B3P, SGK223	ALG1L13P, AC103957.2, ENPP7P1, FAM86B3P, RPL10P19, FDFT1, NEIL2, MSRA, FAM66A, CLDN23, MFHAS1, PRAG1, FAM167A, BLK, ERI1, FAM85B
8	p21.2	rs62501777	25430846:26430846	CED	0.00726876	0.0106706	0.00397516	9.76778e-13	0.0251988	0.00353209	0.00586644		0.0219808	-0.0214098	0.00934576	4.23851e-05	-0.0353814	0.0086409	0.0247162		0.00575586	0.00365801	0.115604	0.0165257	0.00326949	4.3145e-07	EBF2, RNA5SP258	EBF2
17	q25.3	rs1436138	74816880:75816880	AED	0.00753154	-0.00965436	0.0036126	9.41739e-09	-0.0183427	0.00319494	0.00581056		0.023492	0.020764	0.00916532	0.278651	0.00927975	0.0085656	0.0395337		-0.00556399	0.00336094	0.0978258	-0.014969	0.00299348	5.71679e-07	SEPT9	SEPT9
10	q26.3	rs56092448	133922824:134922824	SSE	0.00763594	0.0144534	0.00541774	3.6505e-11	0.0316973	0.00478955	0.00401644		0.0948065	-0.0317274	0.0189911	0.677741	-0.00728836	0.017539	0.0618158		0.0109779	0.00520989	0.0351065	0.0289918	0.00462037	3.50137e-10	INPP5A	INPP5A
12	p11.23	rs1098708	26821112:27821112	SSE	0.00783242	0.00919325	0.00345709	1.64262e-08	0.0173175	0.0030671	0.000549223		0.356338	-0.0139099	0.0150803	0.000917779	-0.0466305	0.014067	0.00139356		0.00803972	0.00336968	0.0170373	0.0144154	0.0029967	1.50601e-06	RP11-582E3.2, STK38L	MED21, TM7SF3, STK38L, C12orf71
20	p12.3	rs6039216	8122480:9122480	AED	0.00834616	-0.00946236	0.00358726	0.135914	-0.00474853	0.00318439	0.0494253		0.583702	-0.00519126	0.00947324	0.000365556	-0.0315403	0.00884929	0.0210487		-0.00892672	0.00335479	0.00779345	-0.00782006	0.0029963	0.00905669	PLCB1	PLCB1
12	q13.13	rs7134677	53941498:54941498	SSE	0.00845867	-0.00995045	0.00377881	1.32701e-09	-0.0203073	0.0033486	0.000994622	SSE_Female	0.950654	0.00054798	0.0088546	3.56919e-07	-0.0419622	0.00824134	0.000220478	SSE	-0.00833299	0.00347555	0.0165026	-0.0233758	0.00310229	4.88308e-14	HOXC4	HOXC4
2	q14.1	rs112641450	113903586:114903586	CED	0.00858145	-0.0117229	0.00446022	1.90657e-08	-0.0222337	0.0039558	0.0298489		0.30478	-0.0210777	0.0205384	0.0316165	0.0414635	0.0192915	0.00641339		-0.0121442	0.00435863	0.00533222	-0.0196635	0.00387517	3.89076e-07	RABL2A, RP11-395L14.17	PAX8, PSD4, AC010982.1, RPL23AP7, DDX11L2
1	q32.1	rs882624	201235913:202235913	AED	0.00883347	-0.0117101	0.00447213	0.583699	0.00216626	0.00395309	0.0200823		0.0138236	0.019936	0.00809746	0.55633	-0.00445623	0.00757467	0.0108717		-0.00431348	0.00391476	0.270528	0.00074865	0.00350454	0.830841	IPO9-AS1	NAV1, RNPEP
11	q23.2	rs7128648	112405129:113405129	CED	0.00888656	-0.00926955	0.00354284	3.59085e-11	-0.0207949	0.003141	0.0132022		0.262874	-0.00921448	0.00822977	0.00263828	-0.0230297	0.00765808	0.064169		-0.00926094	0.00325412	0.00442842	-0.0211167	0.00290606	3.69067e-13	NCAM1	NCAM1
11	p15.5	rs217230	1515507:2515507	CED	0.00911367	-0.00957624	0.00367216	6.1643e-07	-0.016199	0.00324879	0.121018		0.332025	0.00844714	0.00870781	0.00216275	0.0250116	0.00815459	0.0142678		-0.00685494	0.0033836	0.0427716	-0.0105539	0.00301809	0.000470704	AC051649.6, H19	H19, MRPL23, TNNT3, MRPL23-AS1
4	q24	rs56388530	106410958:107410958	CED	0.00912218	0.0105233	0.00403583	1.13417e-10	0.0230846	0.00357997	0.00946731		0.190378	0.0110171	0.00841319	0.0170322	0.0187048	0.00783894	0.0692006		0.0106157	0.00363882	0.00353027	0.0223288	0.00325645	7.04276e-12	NPNT	TBCK
17	p13.2	rs67833703	3388437:4388437	AED	0.00913739	0.00899238	0.00344945	0.816511	0.000708913	0.00305519	0.020991		0.0122399	-0.0566214	0.0226002	0.0366922	-0.0443269	0.0212165	0.0178959		0.00749866	0.00340996	0.0278746	-0.000205987	0.003024	0.945692	RP11-459C13.1, ZZEF1	ZZEF1, ANKFY1, CYB5D2, UBE2G1
20	p12.2	rs6040220	10364516:11364516	AED	0.00999061	-0.00895651	0.00347666	0.000347859	-0.0110259	0.00308257	0.069803		0.0772691	0.0145884	0.00825678	0.852822	0.00142558	0.00768424	0.121607		-0.00541071	0.0032042	0.0912896	-0.0092999	0.00286095	0.0011515	RP4-697P8.3
13	q34	rs9549328	113136156:114136156	CED	0.0102588	0.0105481	0.00410909	7.60191e-09	0.021072	0.00364736	0.00355167		0.825395	-0.0021201	0.00961	0.0276838	0.019652	0.00892529	0.0484527		0.00858999	0.0037782	0.022992	0.0208688	0.00337632	6.37245e-10	MCF2L	AL356740.1, MCF2L, MCF2L-AS1
10	q24.33	rs7916056	104497914:105497914	SSE	0.0108502	0.00891209	0.00349835	9.17197e-13	0.0221031	0.00309441	0.00032778	CED	0.0038111	0.024334	0.00840934	0.00386248	0.0227263	0.0078654	0.0145982		0.0111873	0.00323	0.000533085	0.0221866	0.00287957	1.31018e-14	ST13P13, RPEL1	BORCS7, INA, PCGF6, ATP5MD, SH3PXD2A, CALHM2, WBP1L, CNNM2
6	p12.1	rs10081146	55576740:56576740	CED	0.0110165	-0.00882964	0.00347322	2.67467e-08	-0.0171036	0.00307522	0.00141651		0.00276561	-0.0243649	0.00814068	0.854481	-0.00139384	0.00759976	0.00350955		-0.011222	0.00319461	0.000443408	-0.0148932	0.00285068	1.74677e-07	COL21A1	COL21A1
2	p22.2	rs13419498	37059743:38059743	CED	0.0122149	-0.0105016	0.00419075	1.39171e-09	-0.0225433	0.00372201	0.0265318		0.00220269	-0.0407765	0.0133178	0.191103	0.0161808	0.0123768	0.000865762		-0.0132293	0.00399751	0.000935004	-0.0193317	0.00356433	5.83897e-08	RNU6-939P, QPCT	EIF2AK2, NDUFAF7, PRKD3, QPCT, CEBPZ
1	p36.21	rs77194816	15509119:16509119	CED	0.0127469	-0.00980028	0.0039346	7.41804e-09	-0.0201459	0.00348458	0.00355334		0.511619	0.00555301	0.0084607	0.00124719	0.0254473	0.00788293	0.000385066		-0.00707029	0.00356768	0.0475062	-0.0126932	0.00318709	6.81351e-05	DDI2, RP4-680D5.9	PLEKHM2, AGMAT, CASP9
3	p21.31	rs36022378	49413705:50413705	CED	0.0128471	-0.00932759	0.00374902	1.25833e-07	-0.0175343	0.00331773	0.0726534		0.175121	-0.011954	0.00881582	4.9193e-05	-0.0333205	0.00820705	0.0293317		-0.00972982	0.00345002	0.00479898	-0.0197517	0.0030759	1.34992e-10	ACTBP13	APEH, HYAL3, WDR6, AMT, USP19, UBA7, DALRD3, QRICH1, P4HTM, NICN1, CDHR4, MAPKAPK3, RBM6, INKA1
2	p16.1	rs736345	55346146:56346146	CED	0.0133272	-0.0111552	0.00450727	3.71777e-08	-0.0219806	0.00399357	0.0326144		0.539356	-0.016276	0.026517	0.0268014	0.0538793	0.0243303	0.0212399		-0.011299	0.00444354	0.010997	-0.0199904	0.00394084	3.9235e-07	SMEK2, PNPT1	PPP4R3B, CFAP36, AC015982.1, PNPT1
6	q22.1	rs210639	117393104:118393104	CED	0.0142749	-0.00844326	0.00344581	4.31589e-10	-0.0191055	0.00306055	0.0147061		0.000670647	-0.0321398	0.00944798	0.309293	0.00892065	0.00877392	0.000724896		-0.0112252	0.00323723	0.000525233	-0.0160653	0.00288978	2.70811e-08	GOPC	GOPC, DCBLD1
10	q21.3	rs7090758	64835315:65835315	CED	0.0143954	0.00910037	0.00371858	0.000147857	0.0125358	0.00330348	0.0919859		0.00902363	0.0323946	0.0124052	0.403267	0.00979042	0.0117137	0.0192259		0.0110209	0.00356199	0.00197454	0.0123335	0.00317946	0.000104832	REEP3	MYL9, NRBF2, CLU, REEP3, MRPL35P2, ITGA2B, PTGS1, VSIG2, JMJD1C, PPBP, AQP10
2	q13	rs11692391	113195120:114195120	AED	0.0147195	0.00854609	0.0035036	0.944487	-0.000216082	0.00310321	0.023967		0.00415559	-0.0233763	0.00815531	0.931333	0.000651368	0.00755929	0.0117097		0.00357233	0.00321911	0.267116	-9.09791e-05	0.00287073	0.974718	AC079753.5, IL36G	POLR1B, MERTK, PAX8, IL37, SLC20A1
6	p21.32	rs3131296	31672993:32672993	CED	0.0156769	0.00836654	0.00346243	1.0268e-06	0.0149868	0.00306693	0.0562402		3.84829e-05	-0.0356368	0.00865559	0.00081933	-0.0269825	0.00806291	0.010145		0.00229653	0.00321476	0.474999	0.00968199	0.00286656	0.000731304	NOTCH4	ATF6B, CLIC1, TRBV5-1, HLA-DQA1, TRBV19, TRAV12-1, HLA-H, TRAV17, HLA-G, RNF5, TRBV2, DDX39B, GPSM3, HLA-DRB5, TUBB, HLA-S, TRAV21, BTN3A2, HLA-DOB, HLA-DQB1-AS1, TRAV8-1, MSH5, GPANK1, XRCC6, RNF5P1, HLA-C, HLA-DMA, HCP5, C4A, VWA7, TNXA, TRAV13-1, IER3, PRRT1, CYP21A1P, SLC44A4, TRAV35, TNXB, FLOT1, TRAV12-2, HLA-DQB1, BAG6, HLA-DPB2, HLA-DRB1, C4B, TRBV20-1, HLA-DQB2, TRAV26-1, PSMB9, TSBP1, P…
12	q13.13	rs61932870	51002156:52002156	CED	0.015762	-0.0215735	0.00893532	4.76928e-05	-0.0321298	0.00790061	0.132959		0.861607	-0.00377736	0.0216678	0.0281732	-0.0449119	0.0204613	0.00996778		-0.018987	0.00826051	0.0215318	-0.0337882	0.00737027	4.55292e-06	TFCP2	BIN2, DAZAP2, CERS5, METTL7A
3	q22.3	rs12107581	137593884:138593884	CED	0.0165962	-0.0112834	0.00471012	0.000667704	-0.0142409	0.00418535	0.0671649		0.00258841	-0.0245933	0.00816203	0.52023	0.00485669	0.00755319	0.00179458		-0.0146085	0.00407957	0.000342415	-0.00975458	0.00366089	0.00770941	MRAS	CEP70, FAIM, MRAS
2	q24.2	rs61692975	162173036:163173036	CED	0.0169576	-0.0153574	0.006432	2.18997e-08	-0.032173	0.00574874	0.00699437		0.706537	-0.0161261	0.0428298	0.0184974	-0.0923272	0.0391943	0.0763768		-0.0153744	0.00636067	0.0156449	-0.0334398	0.00568788	4.12415e-09	SLC4A10	PSMD14, AC009299.3
1	q25.3	rs861585	184237925:185237925	SSE	0.017141	0.00829641	0.00348048	1.20824e-08	0.0175791	0.0030847	0.00406659		0.806772	0.00201304	0.00823011	0.0128316	0.0191611	0.0076997	0.0640642		0.00734317	0.00320562	0.0219797	0.0177979	0.00286345	5.115e-10	EDEM3, FAM129A	FAM129A, EDEM3
10	q24.32	rs377697866	104388113:105388113	AED	0.0180128	0.00816336	0.00345118	0.000143846	0.0116464	0.00306359	0.10951		0.00918922	-0.0232346	0.00891869	0.367997	-0.00746267	0.00828961	0.017848		0.00407419	0.00321861	0.205577	0.00935008	0.00287363	0.00113889	NT5C2	CNNM2, NT5C2, BORCS7
4	q32.1	rs56329057	156133444:157133444	CED	0.0183214	-0.00845774	0.00358518	4.35056e-11	-0.0209366	0.00317606	0.00507786	AED	0.090001	-0.0142324	0.00839438	0.00208149	-0.0241933	0.00785854	0.0303704		-0.00934859	0.00329706	0.00457642	-0.0213939	0.00294466	3.72196e-13	GUCY1A3	GUCY1A1, AC104083.1
6	p22.1	rs9393897	27627710:28627710	CED	0.0189268	0.0101391	0.00432003	0.000561992	0.0132314	0.00383586	0.119219		0.717113	0.00325075	0.00897193	0.00237979	-0.0252737	0.00831794	0.00528062		0.00884264	0.00389232	0.0230975	0.00647879	0.00348331	0.0628926	ZKSCAN8, ZNF192P1	ZSCAN12P1, IER3, BTN3A2, FBRSL1, PGBD1, ZKSCAN4, ZNF389, ZSCAN23, ZNF192P1, ZSCAN9, ZKSCAN8, ZSCAN31, ZNF602P, ZNF603P, ZSCAN16, GUSBP2, ZNF165
12	p13.1	rs6488549	12390168:13390168	CED	0.0209845	0.00807263	0.00349724	1.93038e-05	0.0132246	0.00309499	0.0184053		0.968396	0.000326288	0.00823541	0.00140318	0.0245541	0.00768691	0.00789995		0.00688912	0.00321901	0.0323439	0.014805	0.00287101	2.51302e-07	APOLD1	APOLD1, CDKN1B, GPR19
1	q42.2	rs2478539	230344772:231344772	SSE	0.0214637	0.00808473	0.00351548	3.82989e-12	0.0216504	0.00311795	0.00050093		0.00289901	0.0245984	0.00825846	0.350309	0.00719607	0.00770455	0.00421472		0.010618	0.00323461	0.00102842	0.0196163	0.00289025	1.14437e-11	AGT	AGT, COG2
7	p22.3	rs73033340	695692:1695692	CED	0.0233622	-0.0224145	0.00988522	3.94962e-09	-0.0512051	0.00869862	0.0020668		0.013261	-0.0594801	0.0240142	0.196815	-0.0290593	0.0225143	0.063277		-0.0277851	0.00914105	0.00236891	-0.0483287	0.00811407	2.58233e-09	ZFAND2A	ZFAND2A
11	p11.2	rs4752931	46262516:47262516	CED	0.0235074	0.00927415	0.00409435	1.04109e-05	0.0159403	0.00361574	0.0157757		0.777731	0.00230089	0.00815107	0.00948838	0.0196463	0.00757345	0.0333379		0.00786919	0.00365871	0.0314913	0.0166282	0.00326295	3.46767e-07	F2, CKAP5	LRP4, ACP2, CKAP5, F2, C11orf49, NR1H3, C1QTNF4, DDB2, MYBPC3, ZNF408
10	q25.3	rs4918889	115330718:116330718	CED	0.0236935	-0.0103202	0.00456227	5.67701e-05	-0.0163237	0.00405462	0.0775932		0.817976	-0.00269946	0.0117291	0.000213291	-0.0408474	0.0110304	0.00394386		-0.00931872	0.00425194	0.0284055	-0.0192429	0.00380565	4.27258e-07	ADRB1, RNU6-709P	VWA2, NHLRC2, ADRB1, DCLRE1A
6	p21.2	rs62398607	38645523:39645523	AED	0.0236948	-0.00782496	0.00345921	0.915175	-0.000327049	0.00307048	0.0660131		0.84696	-0.00174204	0.00902609	0.0056216	-0.0234796	0.00847867	0.00090119		-0.00704594	0.00323012	0.0291594	-0.00301139	0.002887	0.296909	SAYSD1, KCNK5	SAYSD1, ANKRD18EP
17	q21.32	rs8081301	46539302:47539302	CED	0.0237303	-0.00826142	0.00365309	1.19535e-07	-0.0171644	0.00324199	0.0494162		0.00093091	-0.0316694	0.00956479	0.708519	0.00332234	0.00888685	0.00298339		-0.0112413	0.00341266	0.000987718	-0.0147582	0.00304565	1.26199e-06	GIP	CALCOCO2, SNF8, IGF2BP1, GIP, SUMO2P17, HOXB2, TTLL6, UBE2Z, ATP5MC1
8	q21.13	rs143348642	80886171:81886171	SSE	0.0237564	-0.00976085	0.00431692	1.89614e-11	-0.0257185	0.00383044	0.00564315		0.767528	-0.00396923	0.0134271	0.0530688	0.0244042	0.0126157	0.0273313		-0.00921827	0.00410974	0.0248947	-0.0214878	0.00366522	4.55607e-09	RNU6-1213P, Y_RNA
11	p15.4	rs4910498	9265503:10265503	AED	0.0244803	0.00812397	0.00361141	4.89326e-13	0.023191	0.00320815	0.00101291		0.00218751	-0.0285752	0.00932653	0.838663	-0.00176811	0.00868401	0.0110692		0.00333883	0.00336775	0.321484	0.0201937	0.00300936	1.94239e-11	SWAP70	SBF2, WEE1, ADM, SWAP70
12	q24.21	rs6490022	115430574:116430574	CED	0.0247666	0.00785991	0.00350101	8.55411e-08	0.0166297	0.00310531	0.0204189		0.0394161	-0.0169692	0.00823775	0.000424065	-0.0270777	0.00768159	0.00478718		0.00406134	0.00322209	0.207501	0.0104903	0.00287897	0.000268669	RP11-116D17.1, RP11-1028N23.3
10	p12.31	rs11012732	21330104:22330104	CED	0.0266793	0.0117661	0.00530914	1.05453e-05	0.0207875	0.00471821	0.0237424		0.0236496	0.0285218	0.012604	0.586312	0.0063329	0.0116372	0.0457852		0.0142911	0.00489279	0.00349081	0.0187469	0.00437249	1.80736e-05	MLLT10	NEBL, MLLT10
5	q14.3	rs17420814	87318045:88318045	AED	0.0274249	-0.0100389	0.00455188	4.73201e-07	-0.0202817	0.0040265	0.0833593		0.00136327	-0.0524795	0.0163859	0.0307678	-0.0328068	0.0151872	0.0242398		-0.0130794	0.0043858	0.00286181	-0.0211043	0.00389204	5.87948e-08	LINC00461	MEF2C, TMEM161B, TMEM161B-AS1
16	p13.3	rs8061324	3041490:4041490	SSE	0.0278416	-0.00866168	0.00393797	2.09887e-08	-0.0195718	0.00349253	0.000140753		0.627504	0.00433184	0.00892705	0.0027507	0.0249214	0.00832228	0.0457987		-0.0065451	0.00360298	0.0692819	-0.0129093	0.00322044	6.10954e-05	LA16c-306E5.3	CLUAP1, NAA60, TRAP1, AC025283.3, NLRC3, ZNF174
12	q24.13	rs11066196	112155122:113155122	AED	0.0296423	-0.0135865	0.00624708	0.000116506	-0.0213368	0.00553707	0.154051		0.0508225	-0.05457	0.0279405	0.409341	0.0212534	0.0257597	0.00762406		-0.0155377	0.00609655	0.0108153	-0.0194559	0.00541342	0.000325631	HECTD4	ERP29, HECTD4, MAPKAPK5-AS1, TMEM116, PHETA1, NAA25, MAPKAPK5, SH2B3, ACAD10
6	p21.33	rs12665166	30708242:31708242	AED	0.0336291	0.00769464	0.00362184	6.4085e-06	0.0144742	0.00320753	0.00638589		0.115827	0.0352623	0.0224231	0.00372865	0.0596222	0.0205561	0.0296126		0.00839558	0.0035755	0.0188701	0.0155473	0.00316918	9.30533e-07	XXbac-BPG299F13.16, HLA-C	DDR1, LY6G5B, TCF19, PSORS1C3, NOTCH4, AL662844.4, TNF, MICB, VARS2, HLA-B, GZMK, MICA, HLA-C, CCHCR1, HLA-L, TMEM154, HLA-S
19	p13.2	rs4804517	6906066:7906066	CED	0.0408238	-0.00811989	0.00396996	2.76473e-05	-0.0147072	0.00350829	0.213735		0.509114	-0.00622531	0.00942902	0.00674014	-0.0240238	0.00886619	0.0375513		-0.00783461	0.00365888	0.0322531	-0.0159685	0.00326219	9.82994e-07	AC125387.1, CTB-133G6.1
1	p36.22	rs60259384	8939983:9939983	AED	0.0424292	0.00708224	0.00348999	5.73973e-08	0.0168367	0.00310242	0.00172243		0.0151575	-0.0197886	0.00814754	0.18976	-0.0100843	0.00769018	0.015884		0.00291628	0.00320807	0.363325	0.0130685	0.00287711	5.56615e-06	SPSB1, RNA5SP40
11	p15.1	rs7110527	15772201:16772201	SSE	0.0437487	0.00857569	0.00425274	2.92194e-10	0.0237782	0.00377239	0.00745896	CED	0.140111	0.0137918	0.00934767	0.000181696	0.0323162	0.00863231	0.00283597		0.00947018	0.00387096	0.0144263	0.0251473	0.00345673	3.46715e-13	SOX6
16	p13.3	rs10500326	4418326:5418326	CED	0.0439864	-0.00838873	0.00416472	1.00929e-05	-0.0163135	0.00369478	0.0511034		0.327693	-0.0208894	0.021342	0.00448228	-0.0567138	0.0199537	0.00688547		-0.0088473	0.00408762	0.0304326	-0.0176528	0.00363302	1.17991e-06	UBN1	GLYR1, UBN1, PPL, ROGDI
1	q42.13	rs849903	227637659:228637659	CED	0.0442525	-0.00698022	0.0034698	1.14428e-09	-0.0187414	0.00307833	0.00849072	CED	0.233133	0.00983891	0.00825164	0.000555995	0.0266073	0.00770651	0.0270755		-0.00445312	0.00319852	0.163849	-0.0125014	0.0028587	1.22503e-05	WNT9A, CICP26	OBSCN, RNF187, WNT9A, WNT3A, IBA57, MRPL55, OBSCN-AS1
17	p13.1	rs74439044	7281019:8281019	CED	0.0450931	0.0149575	0.00746458	5.22737e-05	0.0269336	0.00665797	0.0547987		0.0133002	0.0262181	0.0105897	0.100697	0.016102	0.00980914	0.0273681		0.0186953	0.00610117	0.00218237	0.0235173	0.00550885	1.96342e-05	LSMD1	CYB5D1, TMEM88, TNFSF12, KDM6B, ALOX15B, NAA38
12	q24.12	rs6490037	111213671:112213671	CED	0.0451863	-0.00835463	0.0041712	5.98595e-09	-0.0214836	0.00369298	0.00471296		0.00202521	-0.0318568	0.0103201	0.721303	-0.0034009	0.00953379	0.0172123		-0.0116549	0.00386726	0.00258057	-0.0191244	0.00344365	2.79989e-08	CUX2	TMEM116, MAPKAPK5-AS1, PHETA1, ADAM1A, NAA25, MAPKAPK5, SH2B3
3	p21.31	rs7638388	47414974:48414974	CED	0.0452895	0.0116136	0.00580107	4.19049e-09	0.0302723	0.00515117	0.00944416		0.980467	-0.000338968	0.0138449	0.0867476	0.0222504	0.0129902	0.0826875		0.00982855	0.00535038	0.0662129	0.0291823	0.00478843	1.09893e-09	MAP4	MAP4, MON1A, MRPS18AP1, SPINK8, ZNF589, AMT, ALS2CL, ATRIP, SCAP, SHISA5, CAMKV
7	q36.1	rs3918226	150190176:151190176	CED	0.0457149	-0.00705079	0.00352887	3.57724e-07	-0.0159488	0.00313314	0.0183922		0.82858	-0.00182209	0.00841511	0.0203094	-0.0181702	0.00782965	0.0338816		-0.00626882	0.00325431	0.0540655	-0.0162554	0.00290888	2.29438e-08	NOS3	NOS3, GIMAP5
11	p15.5	rs138429802	371030:1371030	SSE	0.0463785	-0.0118456	0.00594673	1.71789e-08	-0.0298997	0.00530278	0.000167805		0.000172931	-0.0339583	0.00904055	0.175327	-0.01147	0.008463	0.00996361		-0.0185238	0.00496825	0.000192674	-0.024704	0.00449355	3.84883e-08	CHID1	PNPLA2, CD151, PIDD1, CHID1, AP006621.1, AP006621.5, CRACR2B, TSPAN4, AP2A2
1	p13.2	rs10158127	112932444:113932444	CED	0.0485959	0.00737256	0.00373836	1.90957e-07	0.017277	0.00331732	0.0447854		0.615628	0.00424469	0.00845449	0.00187425	0.0243913	0.00784354	0.0403242		0.00686102	0.00341903	0.04478	0.0183565	0.0030553	1.87729e-09	RP3-522D1.1, RP3-522D1.2	SLC16A1, AL357055.3
15	q22.31	rs11071908	66442853:67442853	AED	0.0488675	0.00721239	0.00366155	4.25008e-07	0.0163951	0.00324169	0.0148304		0.000409997	-0.0299414	0.00847219	0.0305445	-0.0170189	0.00786801	0.0589737		0.00136489	0.00336108	0.684679	0.0115461	0.00299726	0.000117046	RP11-321F6.1
8	q22.3	rs35783704	105466258:106466258	CED	0.0505034	-0.0112866	0.00577115	0.000100452	-0.0199238	0.00512234	0.0247831		0.446236	-0.010515	0.0138043	0.0124798	-0.0318847	0.0127619	0.0187199		-0.0111718	0.00532456	0.0358906	-0.0215834	0.00475371	5.61684e-06	RP11-127H5.1
8	p23.1	rs17150796	9284034:10284034	CED	0.0521535	0.0105071	0.00541078	0.000480787	0.0167409	0.00479502	0.136982		0.650669	0.00557781	0.0123174	6.27623e-05	0.0459727	0.0114854	0.00331171		0.00970977	0.00495388	0.049992	0.0210797	0.00442488	1.89891e-06	LINC00599, snoU13	FDFT1, MSRA
16	p12.3	rs77924615	19892332:20892332	CED	0.0545443	-0.00841134	0.0043752	1.49416e-06	-0.018616	0.00386853	0.0580009		0.00454458	-0.024997	0.00880815	0.208934	-0.0102799	0.00818115	0.0618103		-0.0116937	0.00391842	0.0028424	-0.0170927	0.00349725	1.02144e-06	PDILT
12	q24.11	rs10774611	110883036:111883036	CED	0.0577789	-0.00659042	0.00347342	0.00188608	-0.00956672	0.00307844	0.385171		0.0359531	0.0171773	0.0081891	0.519895	0.00489106	0.00760055	0.0242911		-0.00296646	0.00319767	0.353566	-0.0075292	0.00285329	0.00832044	RP1-46F2.2	FAM216A, LINC01405, MAPKAPK5-AS1, TCTN1, SH2B3, GPN3
2	p21	rs67584485	43262195:44262195	CED	0.0664031	-0.00711641	0.00387666	1.42381e-08	-0.0195056	0.00343968	0.00554282	SSE_Female	0.565309	-0.0047833	0.00831904	0.00120785	-0.0251019	0.00775394	0.000623685		-0.00670016	0.00351386	0.0565494	-0.0204258	0.0031442	8.22974e-11	THADA	THADA, PLEKHH2
7	q22.1	rs13245899	99997131:100997131	AED	0.0672175	0.00848857	0.00463798	0.00504101	0.0115138	0.00410557	0.0142597		0.764393	0.00255762	0.00853334	0.0198419	0.0185174	0.00794927	0.0414667		0.00713607	0.00407498	0.0799133	0.0129886	0.00364779	0.000369904	ACHE, RN7SL549P	MUC12, SLC12A9, PILRB, TRIP6, SRRT, ACHE, EPHB4, ZAN, GIGYF1, UFSP1
4	p14	rs6812640	37887900:38887900	SSE	0.0679981	-0.00631996	0.00346293	1.35756e-11	-0.0207052	0.00306163	0.0013784		0.00161531	0.0282009	0.00894274	0.124348	0.0127207	0.00827728	0.00353919		-0.00181855	0.00322927	0.573336	-0.0166824	0.00287149	6.25954e-09	RP11-83C7.1, RP11-83C7.2
11	p11.2	rs10501320	46793799:47793799	CED	0.0687041	0.00711368	0.00390782	5.24492e-10	0.0214934	0.00346002	0.00375154	CED	0.0240703	0.0288982	0.0128086	0.00184363	0.0375018	0.0120407	0.0242066		0.00896875	0.00373773	0.0164167	0.0227145	0.00332544	8.46114e-12	MADD	ARHGAP1, ACP2, NUP160, MYBPC3, C1QTNF4, NR1H3, MADD, MTCH2, RTN1, PSMC3, GPER1, SPI1, AC090559.1, FNBP4
13	q34	rs11619038	110423799:111423799	AED	0.0729505	0.00742388	0.00414013	0.0227224	0.00838668	0.00368145	0.225302		0.0118225	-0.0392074	0.0155733	0.125372	0.0222685	0.0145294	0.00194851		0.00434575	0.00400115	0.277423	0.00922414	0.00356868	0.0097449	COL4A1
8	p21.2	rs537551388	22899889:23899889	CED	0.0843102	0.00715248	0.00414344	0.000826278	0.0123315	0.00368776	0.0190221		0.6893	-0.00442553	0.0110691	0.0251435	-0.0230589	0.0102974	0.000596072		0.00572956	0.00388048	0.139808	0.00830851	0.00347184	0.0167059	SLC25A37
21	q22.2	rs117870289	39483448:40483448	CED	0.0879766	0.023307	0.0136604	0.0284898	0.0265643	0.0121271	0.494668		0.384972	0.0275847	0.0317508	0.0269628	0.0631624	0.0285524	0.0134314		0.0239751	0.0125483	0.0560524	0.0321575	0.011162	0.0039645	ERG
4	p15.2	rs28667801	26285356:27285356	CED	0.0883994	0.0060178	0.00353175	6.13396e-08	0.0169263	0.00312577	0.000402799		0.00340224	-0.025083	0.00856324	0.604266	-0.00414688	0.00800123	0.0170936		0.00149661	0.00326496	0.646675	0.014136	0.00291149	1.20226e-06	TBC1D19, STIM2
16	p13.3	rs45593734	0:834732	CED	0.0886732	-0.00915981	0.00538037	2.587e-05	-0.0200168	0.00475777	0.0260751		0.736172	-0.00307738	0.00913354	0.0376961	-0.0176304	0.00848336	0.0767458		-0.00759287	0.00463582	0.101448	-0.0194458	0.0041497	2.78504e-06	PDIA2	PDIA2, TMEM8A, DECR2, HBZ, AXIN1, FAM234A, HBQ1, NME4, HBM
16	q23.2	rs2966114	81091248:82091248	CED	0.0888438	0.00603295	0.00354559	0.000101981	0.0122722	0.00315812	0.0767988		0.913052	-0.000915809	0.00838725	0.0714638	-0.0140859	0.00781431	0.0256662		0.00497944	0.00326577	0.127325	0.00857148	0.00292804	0.00341828	CMIP
15	q26.2	rs12906962	94812071:95812071	AED	0.0914538	-0.00591768	0.00350617	3.28269e-05	-0.0128838	0.00310229	0.0756115		0.0355282	0.0185175	0.00880776	0.00223068	0.0251909	0.00823793	0.00196327		-0.00257521	0.00325755	0.429215	-0.00815481	0.00290325	0.00497177	RP11-57P19.1, CTD-2576F9.1
6	p22.1	rs4289643	28159035:29159035	CED	0.0922979	-0.00643014	0.00381971	0.00435274	-0.00960443	0.00336828	0.109294		0.00969238	0.0266403	0.0102984	0.492404	0.00667335	0.00972086	0.00684016		-0.00243085	0.00358131	0.49729	-0.00785957	0.00318264	0.0135296	LINC00533, RPSAP2	ZNF192P2, ZSCAN12P1, BTN3A2, OR2B8P, ZBED9, PGBD1, ZNF311, ZNF192P1, TRIM27, ZSCAN31, ZSCAN26, ZSCAN9, ZKSCAN3, ZNF603P, ZFP57, OR2J3, ZSCAN23
10	q25.1	rs574277571	105789667:106789667	CED	0.0932104	0.0292746	0.0174387	3.16181e-07	0.0785772	0.0153659	0.0110315		0.936489	0.00243555	0.030565	0.0286868	0.0615012	0.0281102	0.00528062		0.0226835	0.0151468	0.134244	0.0746487	0.013483	3.08559e-08	RP11-127O4.3, RP11-127O4.2
2	q11.2	rs810057	96515073:97515073	AED	0.101772	0.00586131	0.00358198	2.52527e-05	0.0133819	0.0031766	0.00310829		0.0446332	-0.0208657	0.0103902	0.0137759	0.0238442	0.00968019	0.000428407		0.00302223	0.00338639	0.372144	0.014399	0.00301824	1.83624e-06	NCAPH	AC008268.1, GPAT2, ANKRD36C, ZNF514, NEURL3, LMAN2L, ASTL, KANSL3, LINC00342, SNRNP200, ITPRIPL1, DUSP2, ANKRD36B, FAHD2CP, CIAO1, TMEM127, CNNM4, ARID5A
19	p13.11	rs10421727	16725128:17725128	CED	0.105594	0.0064156	0.00396434	2.38595e-07	0.0182138	0.00352528	0.010026		0.503706	0.00600942	0.00898698	0.0701203	0.0151623	0.00837145	0.0162719		0.00634944	0.00362712	0.0800243	0.0177542	0.00324896	4.64019e-08	MYO9B	NR2F6, CPAMD8, HAUS8, OCEL1, MYO9B
5	q22.3	rs2921626	113933063:114933063	AED	0.108303	0.00556277	0.00346401	3.3853e-07	0.0156337	0.00306495	0.00423165		0.890316	-0.00115306	0.00836122	0.000194612	0.0289488	0.00776868	0.00417663		0.00457893	0.00320024	0.152485	0.0174271	0.00285108	9.81213e-10	RP11-438C19.1, TRIM36	ROBO1
16	p11.2	rs9926533	30514179:31514179	AED	0.119609	0.00539031	0.00346326	7.58782e-05	0.0121493	0.00307021	0.0583517		0.00369428	0.159389	0.0548965	0.921624	0.00481487	0.0489372	0.0177837		0.00600079	0.00345639	0.0825382	0.0121205	0.00306419	7.63582e-05	STX1B	CCDC189, PRR14, BCKDK, STX1B, ITGAX, HSD3B7, ZNF668, PHKG2, ITGAM, PRSS53, KAT8, ZNF646, ITGAD, MAPK3, STX4, ARMC5, VKORC1, SETD1A
15	q24.1	rs351186	74096129:75096129	CED	0.131606	-0.00523451	0.00347161	9.71885e-05	-0.0120229	0.0030847	0.0895511		0.00457505	-0.0231819	0.00817474	0.0144112	-0.018685	0.00763596	0.093319		-0.00797675	0.0031954	0.012549	-0.0129576	0.00286014	5.88728e-06	RP11-60L3.2	SCAMP2, CSK, ULK3, MPI, CCDC33, AC023300.1
5	q33.3	rs62386479	157345025:158345025	CED	0.137499	0.0105991	0.00713657	0.000157362	0.0240149	0.00635443	0.0279646		0.810272	-0.00456845	0.019029	6.51446e-05	-0.0691442	0.0173125	0.00603419		0.00872881	0.0066821	0.191451	0.0129545	0.0059653	0.0298823	CTC-436K13.2, RP11-542A14.1
4	q21.21	rs113087495	80682951:81682951	AED	0.141932	0.0145662	0.00991818	0.000119522	0.0340524	0.00885124	0.04362		0.0256103	-0.0396463	0.017761	0.154055	0.0236772	0.0166111	0.00460795		0.0016793	0.00865948	0.846233	0.031758	0.00781148	4.79182e-05	PRDM8, FGF5	PRDM8
12	q24.13	rs2189271	112700293:113700293	AED	0.145849	-0.00505409	0.00347514	0.000406118	-0.0108961	0.00308135	0.208451		0.455577	-0.00812864	0.0108939	0.000951961	-0.0334662	0.010127	0.0442382		-0.00533806	0.00331077	0.10689	-0.0128086	0.00294791	1.39292e-05	RPH3A	OAS1
2	q34	rs1047891	211040507:212040507	SSE	0.145968	-0.00539793	0.00371265	1.42397e-09	-0.0198931	0.00328646	0.00114791		0.479148	0.00624257	0.0088211	0.00761659	0.0220123	0.00824807	0.00716552		-0.00364621	0.00342192	0.286629	-0.0141516	0.00305303	3.56491e-06	CPS1	PHGDH, AARS, PSAT1
8	p23.1	rs922050	8721049:9721049	CED	0.148599	-0.00501979	0.00347509	2.85501e-06	-0.0144145	0.00307928	0.0156627		0.633011	0.00429926	0.0090037	0.00304768	0.0247861	0.00836486	0.0109522		-0.00381155	0.00324199	0.239723	-0.00973627	0.0028897	0.000753598	RP11-115J16.1	MFHAS1
1	p36.22	rs13305986	11408505:12408505	SSE	0.148744	-0.0222866	0.015434	3.09776e-10	-0.0852395	0.0135426	0.00217005		0.00306821	-0.0483171	0.0163171	0.00117076	-0.0500197	0.0154087	0.1424		-0.0345784	0.0112127	0.0020433	-0.0698904	0.0101722	6.38765e-12	NPPA, NPPB	NPPA, CLCN6
11	q24.1	rs7129204	122027212:123027212	CED	0.150377	0.00761164	0.00529245	2.83113e-07	0.0241205	0.0046977	0.0195559		0.00435353	0.0296874	0.0104107	0.753607	-0.00306165	0.0097539	0.0108497		0.0121452	0.00471782	0.0100436	0.0190025	0.0042324	7.13016e-06	UBASH3B	MIR100HG, UBASH3B
21	q22.2	rs2836411	39319830:40319830	AED	0.154825	0.00825351	0.00580129	0.505523	-0.00341814	0.00513368	0.131892		0.890414	-0.00139888	0.0101529	0.0200068	-0.0219419	0.00943193	0.0691169		0.00587776	0.00503701	0.243244	-0.00765162	0.00450905	0.0897064	ERG	KCNJ15
1	q25.1	rs3766694	174643207:175643207	AED	0.159885	0.00811562	0.00577433	0.000948277	0.016921	0.00511905	0.0753181		0.0122295	0.0341885	0.0136446	0.844321	0.00247195	0.0125881	0.0178066		0.0120759	0.00531774	0.0231553	0.0148706	0.00474195	0.00171287	KIAA0040	KIAA0040
21	q22.3	rs137923903	44329595:45329595	SSE	0.174724	-0.0205334	0.0151294	2.50281e-12	-0.0933987	0.0133358	0.000302742	CED	0.00980051	-0.0769435	0.0297884	0.000675525	-0.0956857	0.0281457	0.193591		-0.0321009	0.0134893	0.0173251	-0.093818	0.0120515	6.98354e-15	AP001046.6, SIK1
11	p11.2	rs10838163	43297428:44297428	AED	0.178891	0.00465999	0.00346678	6.24241e-05	0.0122974	0.00307163	0.000921539		0.0155502	0.0202409	0.00836578	0.00269935	0.0232978	0.0077652	0.0248569		0.00694352	0.00320268	0.030156	0.0137858	0.00285629	1.3898e-06	HSD17B12
16	q23.3	rs7500448	82545790:83545790	AED	0.190697	-0.00453573	0.00346629	1.28995e-06	-0.0148658	0.00307052	0.0213345		0.11519	-0.030605	0.0194275	0.00814679	-0.048519	0.0183361	0.0157045		-0.00534002	0.0034124	0.117609	-0.0157838	0.00302835	1.8682e-07	CDH13	CDH13
11	q21	rs2186739	94827374:95827374	AED	0.196352	0.00503386	0.00389612	0.306814	0.00351872	0.0034432	0.396452		0.145832	0.0119177	0.00819388	0.326094	-0.00741579	0.00755152	0.0413665		0.00630324	0.00351861	0.0732286	0.0016367	0.0031329	0.601375	RP11-338H14.1, RP11-644L4.1	SESN3
19	q13.2	rs9304578	38750337:39750337	AED	0.198555	0.00444026	0.00345361	0.00317916	-0.0090428	0.00306546	0.00350284		0.0293605	-0.0216834	0.00995221	0.511896	0.00600735	0.009159	0.0203129		0.0016325	0.00326274	0.616831	-0.00752672	0.00290696	0.00961983	CAPN12	ACTN4, SARS2, LGALS7, AC022144.1, LGALS4, CAPN12, RINL, LGALS7B
2	p21	rs76099932	42666683:43666683	CED	0.204635	-0.0075835	0.0059785	1.9477e-08	-0.029841	0.00531278	0.00392958	SSE_Female	0.0634068	-0.021868	0.0117797	5.20667e-07	-0.0546474	0.0108869	0.0158233		-0.0105093	0.00533119	0.0486911	-0.0346122	0.0047746	4.19107e-13	AC098824.6, AC016735.1
8	p23.1	rs6991853	9567157:10567157	CED	0.206218	0.00509774	0.0040329	6.72717e-07	0.0176954	0.00356097	0.000117684		0.457262	0.00768371	0.0103363	0.00246386	0.0290965	0.0096092	0.0423571		0.0054394	0.00375706	0.147678	0.019072	0.00333907	1.11795e-08	MSRA	MSRA, AF131215.2
7	p14.2	rs343003	34979439:35979439	AED	0.221019	0.004984	0.00407247	0.00772665	0.00964217	0.00361968	0.154852		0.0225546	0.0460803	0.0202014	0.450662	0.0142663	0.0189128	0.0152818		0.00658893	0.00399216	0.0988473	0.00980556	0.00355515	0.00581338	AC009531.2, AC007652.1	DPY19L1
2	q31.2	rs59532220	179149461:180149461	AED	0.22157	0.0051086	0.00417926	0.000236128	0.0136106	0.00370163	0.0429446		0.00366148	0.034017	0.0117048	0.777452	-0.00308115	0.0109012	0.00396086		0.00837736	0.00393589	0.0332997	0.011885	0.00350507	0.000696903	TTN	CCDC141
6	q27	rs4709981	165679399:166679399	AED	0.221709	-0.00426999	0.00349426	0.000183033	-0.0116295	0.0031083	0.0115015		0.138057	-0.0159619	0.0107624	0.00928722	-0.0261199	0.0100405	0.0195804		-0.00538493	0.00332348	0.105174	-0.0128968	0.00296927	1.40286e-05	RP11-252P19.1	PDE10A
10	q26.13	rs72830780	123635862:124635862	SSE	0.22675	0.00657595	0.00544016	2.53825e-10	0.030483	0.00481945	0.000604411		0.787893	-0.00353121	0.0131247	0.0137232	0.0297915	0.0120879	0.0200402		0.00509406	0.00502555	0.310758	0.0303882	0.00447675	1.13703e-11	PLEKHA1	PLEKHA1
8	p23.1	rs6991320	10022949:11022949	CED	0.232596	-0.00459438	0.00384885	4.6275e-06	-0.0155914	0.00340338	0.00956435		0.1902	-0.0113222	0.00864277	0.0071325	-0.021894	0.00813673	0.0104042		-0.0057078	0.00351597	0.104506	-0.0165299	0.00313979	1.40459e-07	RP1L1	RP1L1, SOX7, PINX1, C8orf74, AF131215.2, FAM167A, BLK, MSRA
6	p22.1	rs3129817	29842753:30842753	AED	0.242528	0.00406538	0.00347856	0.0327026	0.00659549	0.00308817	0.0491505		0.00029502	0.137694	0.038035	0.39235	-0.031156	0.0364238	0.000148481		0.00517383	0.0034641	0.135292	0.00632605	0.00307713	0.039799	UBQLN1P1, MICC	LINC00243, HLA-J, HCG18, HLA-DQA1, TRIM31, HLA-H, ZNRD1ASP, HLA-G, HCG4, PPP1R18, CCHCR1, HLA-A, TUBB, BTN3A2, TRIM10, ZNRD1, POU5F1, HLA-C, ZFP57, GABBR1, C4A, IER3, HLA-K, FBRSL1, TRIM26, HLA-DQB1, TRIM15, HLA-L, TMEM154, HLA-DRB1, VARS2, DDX39BP2, HLA-B, HLA-DPB1, FLOT1
11	q13.1	rs112437639	65031612:66031612	SSE	0.248462	-0.0157115	0.0136137	2.71845e-08	-0.0664071	0.0119461	0.00236554	SSE_Female	0.617164	0.0158034	0.0316143	0.00277684	-0.0871457	0.0291296	0.00831439	SSE	-0.0107818	0.0125037	0.38853	-0.0693928	0.0110528	3.42233e-10	RP11-770G2.2	RNASEH2C, OVOL1, RIN1, CTSW, SIPA1, SPDYC
15	q23	rs11853359	71121524:72121524	AED	0.249571	-0.00400259	0.00347629	0.0181421	-0.00728942	0.00308518	0.0571488		0.0147585	-0.0206238	0.00845779	0.609934	-0.00403126	0.00790176	0.015884		-0.00640469	0.0032153	0.0463772	-0.00685843	0.00287389	0.0170114	THSD4	THSD4
17	p13.1	rs12951053	7077407:8077407	CED	0.274971	-0.00470942	0.00431389	0.000416229	-0.0134782	0.00381858	0.113938		0.994606	0.00017712	0.0262008	0.0271352	-0.0541392	0.024501	0.0649899		-0.00458045	0.00425658	0.281889	-0.0144425	0.00377303	0.000129287	TP53	SLC35G6, ZBTB4
14	q24.2	rs227426	69956664:70956664	AED	0.281695	0.00376921	0.00350128	1.92599e-07	0.0161158	0.0030953	0.00359063		0.402856	0.00984641	0.0117703	0.0117776	0.0273881	0.0108731	0.0322982		0.00426325	0.00335595	0.203958	0.0169608	0.00297702	1.21757e-08	SMOC1	SMOC1
21	q22.2	rs762384	39574396:40574396	AED	0.282723	0.00371874	0.00346179	0.00300486	0.00910135	0.00306724	0.0485025		0.00754761	0.0219937	0.00823146	0.253053	0.00878569	0.00768661	0.0166112		0.00646522	0.00319107	0.0427614	0.00905799	0.00284881	0.00147491	ERG, LINC00114	ERG
8	q22.1	rs28419772	95521436:96521436	CED	0.296688	-0.00362006	0.00346893	1.08281e-05	-0.0135342	0.00307592	0.0258218		0.875259	0.00356379	0.0227017	0.0312399	0.0460605	0.0213827	0.0323155		-0.00345615	0.00342913	0.313512	-0.012326	0.00304458	5.15455e-05	NDUFAF6	NDUFAF6, TP53INP1
13	q12.3	rs7338758	29637828:30637828	AED	0.303572	-0.00418274	0.00406562	3.19637e-05	-0.0149847	0.00360286	0.000370573		0.949084	0.000859887	0.0134657	0.0325994	0.0268241	0.0125518	0.0255709		-0.00376147	0.00389209	0.333825	-0.0118022	0.00346302	0.000654243	SLC7A1
19	q12	rs17513752	29790811:30790811	CED	0.312075	-0.00374664	0.00370632	0.000173721	-0.0123531	0.00329018	0.0135377		0.673914	0.00354486	0.00842434	0.0219157	0.0179501	0.00783185	0.0195123		-0.00256418	0.00339251	0.449748	-0.00780728	0.00303338	0.0100591	C19orf12, CCNE1	CCNE1, C19orf12
16	q23.2	rs200554033	80992667:81992667	AED	0.31505	-0.00373833	0.00372089	2.92144e-05	-0.0137951	0.00330058	0.00455805		9.07495e-05	0.0341027	0.00871126	0.605714	0.00420235	0.00814083	0.000461697		0.00210034	0.00342181	0.539342	-0.0112544	0.00305875	0.000233779	CMIP
17	q23.3	rs4277405	61048918:62048918	AED	0.327315	-0.00351552	0.00358894	2.83461e-07	-0.0164002	0.00319423	0.0015546		0.853071	0.00150883	0.00814691	0.0563063	-0.0144483	0.00756961	0.0141157		-0.00269894	0.00328437	0.411218	-0.0161052	0.00294294	4.43782e-08	RP11-269G24.6, CTD-2501B8.5	KCNH6, TANC2, ACE, FTSJ3
22	q13.2	rs739292	41868857:42868857	SSE	0.330056	0.00336502	0.00345483	4.82142e-08	0.0167456	0.00306809	0.00312582		0.235313	-0.11313	0.0953222	0.104502	-0.131915	0.0812555	0.0410062		0.00321219	0.00345256	0.352175	0.016534	0.00306591	6.93503e-08	LINC00634, SEPT3	CYP2D7, SMDT1, CCDC134, LINC00634, CYP2D6, NAGA, PHETA2, SNU13, L3MBTL2, AC254562.2, TNFRSF13C, NDUFA6, WBP2NL, AC254562.1
13	q12.12	rs61948063	24751848:25751848	SSE	0.330238	0.00518774	0.00532821	4.74716e-09	0.0276186	0.00471622	0.000695347		0.00303196	0.0243273	0.00820538	0.92182	-0.00075433	0.00768613	0.0128449		0.0108645	0.00446872	0.0150475	0.0198579	0.0040198	7.81116e-07	AL359538.1, ATP12A	ATP12A
9	q34.2	rs115478735	135649711:136649711	OED	0.33082	0.00337465	0.00347019	0.034945	-0.00649319	0.00307878	0.0160646		0.00867481	0.0227167	0.00865453	0.633867	0.00381713	0.00801422	0.0176918		0.00605366	0.00322091	0.0601784	-0.00516725	0.002874	0.072188	ABO	ABO
3	q23	rs55788564	140644408:141644408	AED	0.334205	-0.0204649	0.0211921	6.30837e-05	0.0751662	0.0187866	0.000733439		0.911672	-0.00193162	0.0174128	0.017673	0.0383182	0.0161508	0.00874431		-0.00940113	0.0134538	0.484694	0.053978	0.0122471	1.04619e-05	ZBTB38	ZBTB38
20	q12	rs7275102	39511753:40511753	AED	0.335305	-0.00352938	0.00366314	1.15009e-06	-0.0158635	0.00326127	0.00375195		0.159285	0.0121722	0.00864794	0.0113535	0.0203723	0.00804666	0.0388252		-0.00114072	0.00337302	0.735221	-0.0107511	0.00302246	0.000375042	RP4-620E11.5, CHD6	CHD6, PLCG1
6	q26	rs9365555	163257127:164257127	AED	0.362941	-0.00332863	0.00365872	1.08787e-05	-0.0143008	0.00325089	0.00795496		0.887274	-0.00158398	0.011174	0.000189516	-0.038465	0.010304	0.00762406		-0.0031597	0.00347707	0.363497	-0.0164883	0.00310025	1.04692e-07	PACRG, RP3-495O10.1	QKI
11	q14.1	rs4944176	77052987:78052987	AED	0.364967	0.00394411	0.00435359	4.65771e-05	0.0156767	0.00384961	0.00159217		0.0402218	0.0900096	0.0438733	0.988612	-0.000606438	0.0424892	0.0689474		0.00478331	0.00433231	0.269549	0.0155441	0.00383391	5.02668e-05	RP11-91P24.7	RSF1, AAMDC, AQP11, INTS4, AP002812.3, AP002812.2, CLNS1A
3	p21.1	rs11714712	53350855:54350855	CED	0.387383	0.00307003	0.00355173	0.000806568	0.010534	0.00314393	0.097319		0.133486	0.0178641	0.011905	0.00138489	-0.0350432	0.0109576	0.000537957		0.00427917	0.00340349	0.208649	0.00706738	0.003022	0.0193539	CHDH	PIANP
2	p24.3	rs6431689	14904546:15904546	AED	0.419537	-0.00329072	0.00407657	1.18548e-05	-0.0158168	0.00361084	0.000547703		0.302146	0.0140581	0.013624	0.00249613	-0.0381136	0.0126035	0.0024692		-0.00186508	0.00390548	0.632968	-0.0175081	0.00347119	4.56316e-07	NBAS	NBAS
7	q34	rs73158615	138937466:139937466	SSE	0.423632	-0.00496176	0.00620113	1.11707e-08	-0.0314931	0.00551333	1.03876e-05		0.60297	-0.0279523	0.0537397	0.0285078	0.107571	0.0491119	0.0112937		-0.00526386	0.00616025	0.392835	-0.0297624	0.00547891	5.56745e-08	HIPK2
3	p21.31	rs34221642	48465078:49465078	CED	0.445616	0.00565351	0.00741205	0.00345526	0.0192578	0.00658596	0.0625524		0.866751	-0.00474339	0.02827	0.024137	0.061327	0.0271954	0.0456866		0.00498477	0.00716971	0.486896	0.0215884	0.00640094	0.000744382	ARIH2	WDR6, ZNF589, AMT, UBA7, IP6K2, ARIH2, P4HTM, NCKIPSD
17	q25.3	rs7221314	76258251:77258251	SSE	0.453024	-0.0027902	0.00371836	4.07419e-10	-0.0205674	0.00329	0.000342845		0.778245	0.00229796	0.00816008	0.0143592	0.0185965	0.00759573	0.00560052		-0.00191534	0.00338363	0.571351	-0.0143806	0.00301897	1.90347e-06	CYTH1	CYTH1, TIMP2, USP36
15	q26.2	rs4984497	96135899:97135899	AED	0.459229	0.00258381	0.00349108	0.0484685	-0.00611576	0.00309933	0.0256116		0.395656	-0.00718315	0.00845652	0.0242277	0.0179181	0.00795084	0.015288		0.00116164	0.00322692	0.718859	-0.00294547	0.00288769	0.307723	RP11-236L14.1, NR2F2-AS1
2	q11.1	rs1813381	95922939:96922939	AED	0.468847	-0.00280692	0.00387504	9.19919e-05	-0.0134551	0.00344042	0.0398919		0.0437319	-0.0210541	0.0104396	0.0022232	0.0297068	0.00971154	0.000185361		-0.00501656	0.00363285	0.167313	-0.00864226	0.00324294	0.00770002	AC008268.1, AC008268.2	TMEM127, ZNF514, NEURL3, ITPRIPL1, DUSP2, LMAN2L, ANKRD36B, AC008268.1, GPAT2, FAHD2CP, ASTL, ANKRD36C, CIAO1, ARID5A, LINC00342
18	q21.1	rs8098210	44531657:45531657	AED	0.505115	-0.00301657	0.00452622	8.1555e-08	0.0216013	0.00402718	4.83646e-05		0.368194	-0.0186816	0.0207601	0.0109394	-0.049088	0.0192897	0.0692973		-0.00372742	0.00442233	0.399306	0.0186489	0.00394218	2.23858e-06	RP11-157P23.2
17	q21.33	rs17637472	46961433:47961433	AED	0.505248	0.00369541	0.00554652	8.7436e-06	0.0218036	0.00490383	0.0101524		0.00288623	0.0260175	0.00873094	0.166471	0.0113692	0.00821672	0.0141548		0.0101137	0.0046817	0.0307522	0.0190631	0.00421091	5.98038e-06	RP11-81K2.1	GNGT2, PHOSPHO1
13	q34	rs9555690	110513190:111513190	OED	0.516817	-0.00360617	0.00556284	0.0124427	0.0122693	0.00490897	0.0229531		0.043674	0.0167054	0.008281	0.593334	0.00412887	0.00773172	0.0197606		0.00270959	0.00461768	0.557347	0.00993056	0.00414423	0.0165644	COL4A2	COL4A2
12	q21.33	rs10858935	89723202:90723202	AED	0.52543	0.00237115	0.0037341	5.80006e-05	0.0132987	0.0033074	0.0162632		0.00635004	0.0457455	0.0167604	0.108783	0.0248505	0.0154954	0.0938907		0.0044223	0.00364474	0.225001	0.013802	0.00323454	1.98046e-05	RNU6-148P, RP11-654D12.2	POC1B
13	q34	rs4773140	110454237:111454237	AED	0.56104	-0.00232282	0.00399591	0.0292644	0.00771093	0.00353725	0.000468643		0.0341173	-0.0173334	0.00818071	0.893186	-0.00102163	0.00760848	0.0721366		-0.0052143	0.00359048	0.14643	0.00615892	0.00320755	0.0548413	COL4A1	RAB20
10	q11.21	rs11239271	44876294:45876294	CED	0.565561	-0.00224983	0.00391545	3.73508e-05	-0.0143186	0.00347253	0.0150324		0.043952	-0.0171731	0.00852404	0.177418	0.0107254	0.00795191	0.000148481		-0.00484995	0.00355804	0.172852	-0.0103076	0.00318233	0.00119942	TMEM72-AS1	RASSF4, TMEM72, ALOX5
10	q25.1	rs143109501	107243927:108243927	AED	0.630598	0.00836973	0.0174048	6.6915e-07	0.07663	0.0154176	0.00310752		0.438052	-0.0388296	0.0500705	0.0764026	0.0780045	0.0440204	0.0167117		0.00328146	0.0164399	0.841791	0.0767802	0.014551	1.31572e-07	RP11-56I23.1, RP11-298H24.1
7	q36.1	rs73725602	148973261:149973261	SSE	0.652555	0.00291652	0.00647805	2.24019e-08	0.0322086	0.00575916	0.000726543	CED	0.018256	0.037403	0.015845	0.000850402	0.048524	0.0145449	0.082822		0.00785538	0.00599627	0.190181	0.0344199	0.00535468	1.29293e-10	SSPO	SSPO, ZNF467
12	p12.2	rs17375682	19924229:20924229	OED	0.660094	-0.00154596	0.00351528	0.0147424	0.00760105	0.00311689	0.0305001		0.0387533	0.016737	0.00809759	0.755016	-0.00235574	0.00754958	0.0423023		0.0013532	0.00322455	0.674737	0.00615106	0.00288101	0.0327581	CTC-465D4.1, RP11-284H19.1
13	q13.3	rs7322054	37746708:38746708	CED	0.664281	-0.001877	0.00432476	0.0046764	-0.0108522	0.00383667	0.120555		0.00352314	0.0250457	0.00858237	0.788643	-0.00212821	0.00793886	0.00564628		0.003575	0.00386212	0.354624	-0.00920043	0.00345442	0.00773596	TRPC4
13	q34	rs656533	110293123:111293123	AED	0.699744	0.00147786	0.00383197	0.102933	-0.00552791	0.00338968	0.170883		0.159624	-0.012755	0.00906934	0.686326	0.00340785	0.00843842	0.0959925		-0.000678132	0.00352982	0.847652	-0.00428637	0.0031454	0.172963	RN7SL783P, COL4A1
15	q26.3	rs8025126	101289567:102289567	AED	0.715771	0.00135765	0.0037286	0.00366664	0.00962369	0.00331219	0.0351973		0.578298	0.00581771	0.0104658	0.0165625	0.02339	0.00976048	0.0731133		0.00185998	0.00351235	0.596421	0.0110453	0.00313651	0.000429098	CHSY1	CHSY1
1	q32.1	rs2820321	201380296:202380296	AED	0.727147	-0.0012708	0.00364205	0.00337285	-0.00946223	0.00322769	0.0349961		0.0219455	0.0186898	0.00815627	0.766345	0.00226136	0.00760989	0.0571088		0.00204754	0.00332556	0.538094	-0.00767474	0.00297146	0.00979962	LMOD1	SHISA4, LMOD1, RNPEP, IPO9, AL513217.1
16	q24.3	rs2460448	89200881:90200881	AED	0.740908	0.00117453	0.00355216	0.000310267	0.0113364	0.00314321	0.012379		0.178285	-0.0118936	0.00883562	0.000558268	-0.0285824	0.00828122	0.0138884		-0.000643739	0.00329579	0.845141	0.00630968	0.00293865	0.0317827	DPEP1	SPATA2L, LINC02166, DPEP1, VPS9D1, DEF8, FAM157C, VSIG10, ZNF276, SPATA33, CPNE7, ZNF395, SPIRE2, TCF25, DBNDD1, CDX2, SH3PXD2A, CDK10, RPL13, SPG7, CDS1, CHMP1A, MC1R, FANCA, ANKRD11
13	q34	rs9550246	114010489:115010489	AED	0.74538	0.00112937	0.00347777	0.00869358	0.00809224	0.00308405	0.0169672		0.843337	-0.0016037	0.00811472	0.0403001	-0.0154556	0.00753661	0.015884		0.000705266	0.00319657	0.825379	0.00471468	0.00285431	0.0985806	TMEM255B	TMCO3, TMEM255B
5	q31.1	rs17622656	131320997:132320997	OED	0.750576	-0.00121675	0.00382768	0.00011838	0.0130948	0.00340165	0.000913344		0.0165732	0.0199461	0.00832398	0.478491	-0.00548617	0.00774073	0.00796139		0.00247709	0.00347762	0.476284	0.0100873	0.00311421	0.00119897	IRF1	SLC22A5, MIR3936HG, PDLIM4, SLC22A4, IRF1, RAD50, AC116366.1, SHROOM1, P4HA2
6	q22.31	rs283048	118136902:119136902	AED	0.756114	0.00118198	0.00380562	0.00134938	-0.0108338	0.00337994	0.00589284		0.0211219	-0.0227924	0.00988415	0.655666	-0.00409289	0.00917876	0.0348853		-0.0019132	0.00355147	0.59009	-0.0100289	0.00317173	0.00156712	SLC35F1	PLN, CEP85L
10	q25.1	rs191784289	106394942:107394942	CED	0.766143	0.0047042	0.0158165	7.80772e-08	0.0738248	0.0137432	0.000970968		0.274564	0.0406663	0.0372185	0.68155	0.0144525	0.0352198	0.203942		0.0102053	0.0145566	0.483256	0.0659791	0.012803	2.55793e-07	SORCS3
21	q22.11	rs28451064	35093827:36093827	AED	0.769707	0.00103129	0.00352268	0.0408692	0.00639612	0.00312789	0.0210399		0.366232	-0.00823658	0.00911558	0.0889066	0.0144706	0.00850588	0.0342822		-0.000172939	0.00328586	0.958026	0.00735795	0.00293569	0.0121975	AP000320.7	SLC5A3, AP000317.1, MRPS6, LINC00310, LINC00649
7	q31.1	rs17155335	107389683:108389683	AED	0.795352	0.00100865	0.00388887	0.000119565	-0.0132539	0.00344516	0.00309821		0.0118478	-0.0227688	0.00904654	0.830277	-0.00181673	0.00847556	0.00705876		-0.00269991	0.00357275	0.449832	-0.0116321	0.00319157	0.000267762	NRCAM	PNPLA8, NRCAM
16	p12.3	rs9932532	16982912:17982912	SSE	0.796948	0.000916842	0.00356333	9.72622e-09	0.0181356	0.00316189	0.000301027		0.0122008	0.0206935	0.00825598	0.642476	0.00354902	0.00764472	0.00961441		0.0040224	0.00327161	0.21889	0.0160048	0.00292183	4.30995e-08	XYLT1	XYLT1
4	p15.33	rs2702565	14578484:15578484	SSE	0.82051	0.000810185	0.00357084	3.19216e-09	-0.0187101	0.0031596	4.50503e-06		0.415616	-0.00732676	0.0090002	0.00867775	0.0219796	0.00837428	0.00856572		-0.000296464	0.00331915	0.928828	-0.0136396	0.00295619	3.95166e-06	RP11-665G4.1	CPEB2, LINC00504, AC098829.1
13	q34	rs7334306	110462520:111462520	AED	0.849764	0.000881055	0.00465134	0.00607429	0.011329	0.00412897	0.00603133		0.0295949	0.0224112	0.0103011	0.172447	0.0131224	0.00961762	0.239408		0.00452734	0.00423921	0.285536	0.0116081	0.0037941	0.00221698	COL4A2	RAB20
10	q24.33	rs7067666	104832452:105832452	AED	0.889421	0.00079797	0.00573927	0.00136964	-0.0161875	0.00505699	0.00808803		0.0230661	-0.0249937	0.0109984	0.864758	-0.00174052	0.0102189	0.0607068		-0.00472208	0.00508816	0.353381	-0.0133455	0.00453238	0.00323492	NEURL1	BORCS7, NT5C2, SH3PXD2A
9	p13.3	rs76452347	35406471:36406471	AED	0.893855	-0.000545997	0.00409207	0.00174307	-0.0114169	0.00364653	0.0473282		0.193284	-0.0154182	0.0118514	0.014379	-0.0270018	0.0110311	0.0745574		-0.00213019	0.00386799	0.581825	-0.0129522	0.00346226	0.000183321	HRCT1	HRCT1, GBA2, FAM221B, TPM2
9	q31.2	rs4743021	108914561:109914561	AED	0.9148	-0.000391496	0.00365931	0.000153327	0.0122973	0.00324835	0.00290189		0.00206771	0.0266054	0.00863619	0.724593	0.00282535	0.00801904	0.0218058		0.00371769	0.00336933	0.269856	0.0109621	0.00301071	0.000271537	RP11-308N19.4
13	q12.11	rs9509847	21818314:22818314	SSE	0.927018	-0.000328065	0.00358158	1.22149e-13	-0.0235233	0.00317239	9.05273e-07		0.00193349	-0.0401755	0.0129573	0.225849	-0.014668	0.0121109	0.0699657		-0.00315649	0.00345213	0.360527	-0.0229547	0.00306885	7.43788e-14	FGF9, RN7SL766P
13	q34	rs11838776	110540681:111540681	AED	0.973471	-0.000130199	0.00391505	0.00912062	0.00902641	0.00346168	0.0032778		0.0152603	0.020538	0.00846464	0.991372	8.51884e-05	0.00787793	0.0251965		0.00351205	0.00355338	0.322973	0.00757939	0.00316921	0.0167765	COL4A2	COL4A2

## Sheet: 6150_4
CHR	Band	locus	Range	Type	p_male	beta_male	se_male	p_female	beta_female	se_female	Min P_diff	Type (Rep)	p_male (Rep)	beta_male (Rep)	se_male (Rep)	p_female (Rep)	beta_female (Rep)	se_female (Rep)	Min p_diff (Rep)	Type (Final)	beta_male (Meta)	se_male (Meta)	p_male (Meta)	beta_female (Meta)	se_female (Meta)	p_female (Meta)	Genes	QTL Genes
4	q21.21	rs13125101	80674592:81674592	CED	1.45939e-42	0.023441	0.00171384	3.15817e-35	0.0182165	0.00147058	0.0184906	CED	0.000119	0.120925	0.0314276	0.00125228	0.0955738	0.0296214	0.104366		0.02373	0.0017113	1.00812e-43	0.0184067	0.00146877	4.98647e-36	PRDM8, FGF5	FGF5
19	p13.2	rs12978472	6757990:7757990	CED	2.91695e-28	-0.0257829	0.0023383	6.48322e-18	-0.0172478	0.00199986	0.00307668		0.493356	-0.0277906	0.0405719	0.00999627	-0.100728	0.0391034	0.0831323		-0.0257895	0.00233443	2.25433e-28	-0.0174656	0.00199725	2.23381e-18	INSR
19	p13.2	rs167479	11026765:12026765	CED	3.31113e-22	-0.0150926	0.00155725	9.12696e-19	-0.0118446	0.00133895	0.113761		0.34514	-0.0273404	0.0289614	0.216759	-0.0336643	0.0272546	0.346937		-0.0151279	0.001555	2.2785e-22	-0.0118971	0.00133734	5.78238e-19	RGL3	ACP5
10	q21.2	rs72831344	63018378:64018378	CED	5.87019e-22	-0.0212343	0.00220429	1.22179e-20	-0.0176543	0.00189508	0.0299064	SSE_Male	0.13489	-0.0560065	0.0374619	1.87578e-06	-0.174724	0.0366578	0.00442445		-0.0213543	0.00220048	2.88902e-22	-0.018073	0.00189255	1.3031e-21	C10orf107
15	q26.1	rs4932373	90929287:91929287	CED	3.22111e-19	0.0150609	0.00168053	7.76439e-16	0.011605	0.00144009	0.0620077		0.427124	-0.0229442	0.0288937	0.0264564	-0.0609184	0.0274476	0.0493716		0.0149328	0.00167769	5.54629e-19	0.0114059	0.00143811	2.17095e-15	FES	FES, PHAX, MAN2A2, RCCD1, FURIN
1	p36.22	rs880315	10296866:11296866	CED	1.10671e-18	0.0145896	0.00165324	7.28331e-16	0.0114199	0.00141575	0.0198385		0.904728	0.00730327	0.0610409	0.0129402	0.135116	0.0543636	0.0372045		0.0145843	0.00165263	1.09599e-18	0.0115037	0.00141527	4.3537e-16	CASZ1	CASZ1, KIF1B, MTF2
10	q23.33	rs7080472	95512950:96512950	AED	1.71562e-18	-0.0138624	0.00157965	3.35011e-08	-0.00748897	0.00135613	0.000194703		0.802253	-0.0130528	0.0521245	0.00723858	0.126307	0.0470306	0.0235714		-0.0138617	0.00157893	1.64681e-18	-0.00737782	0.00135557	5.25063e-08	PLCE1	NOC3L, HELLS
5	p13.3	rs12656497	32331939:33331939	CED	2.09121e-18	0.0139037	0.0015884	4.33574e-19	0.0121644	0.00136235	0.0112497		0.00674897	-0.0847902	0.0312999	0.341645	-0.0278708	0.0293113	0.0921948		0.0136502	0.00158636	7.64986e-18	0.0120781	0.00136088	6.98032e-19	NPR3, CTD-2218G20.1	NPR3
12	q21.33	rs11105377	89588829:90588829	CED	1.52363e-16	-0.0170885	0.00206995	3.98771e-09	-0.010456	0.00177673	0.00697072		0.0197458	-0.0682553	0.0292799	3.30811e-07	-0.14289	0.0279904	0.00442445		-0.017343	0.0020648	4.48956e-17	-0.0109875	0.00177316	5.77166e-10	ATP2B1	GALNT4, POC1B
2	p23.3	rs1275988	26414364:27414364	CED	2.26883e-16	-0.0131702	0.0016046	2.7986e-25	-0.0142853	0.00137492	0.0647227		0.0129151	0.0736221	0.029616	0.0737701	0.0499133	0.0279174	0.0867648		-0.0129162	0.00160225	7.55065e-16	-0.01413	0.00137326	7.86738e-25	AC015977.5, KCNK3	AC015977.2, KHK, CIB4, KCNK3
11	p15.1	rs7110527	15772201:16772201	SSE	1.11314e-15	-0.0154193	0.00192393	4.56816e-07	-0.00832915	0.00165137	0.00290482		0.0017408	0.0915212	0.0292285	0.23994	0.0326414	0.0277782	0.00509349		-0.014958	0.00191978	6.62131e-15	-0.00818486	0.00164846	6.86446e-07	SOX6
11	q22.1	rs604723	100110546:101110546	CED	1.62042e-15	0.0138377	0.00173662	6.36894e-24	0.0150064	0.00148765	0.0156381		0.0299024	0.064251	0.029589	0.0451657	0.0565126	0.0282179	0.0372347		0.0140108	0.00173364	6.38608e-16	0.0151214	0.00148559	2.46667e-24	ARHGAP42	ARHGAP42
20	p12.2	rs1887320	10465998:11465998	CED	1.94953e-15	0.0124185	0.00156301	1.13649e-12	0.00952583	0.00133915	0.0455606		0.419443	-0.0233802	0.0289582	0.0256937	-0.0611852	0.0274274	0.0916038		0.0123145	0.00156074	3.01741e-15	0.00935766	0.00133756	2.6321e-12	RP11-103J8.1
7	q36.1	rs3918226	150190176:151190176	CED	3.23191e-15	0.0227543	0.00288674	2.02688e-27	0.0269175	0.00248083	0.115912		0.257936	0.0605211	0.0535043	0.0370881	0.105143	0.0504346	0.0659375		0.0228639	0.00288255	2.15915e-15	0.0271063	0.00247783	7.45941e-28	NOS3	NOS3, GIMAP5
12	q24.12	rs3184504	111384608:112384608	CED	3.71036e-15	-0.012265	0.00155942	9.20642e-18	-0.011457	0.00133464	0.0169946		0.00187685	0.0933537	0.0300316	0.60549	0.0148394	0.0287247	0.00295827		-0.011981	0.00155732	1.43358e-14	-0.0114004	0.0013332	1.21911e-17	SH2B3	CLUAP1, PRKCA, ICAM1, KLF6, COCH, TSPAN2, RAB11FIP5, TUBB6, GBP5, PTPN4, RNF165, VIM, DUSP18, SPIB, TNFRSF13C, GLB1L2, WARS, LGALS3BP, IDO1, TRIM22, GBP6, MAL, TRAK1, TP53INP2, APOL3, DHRS3, FCGR1CP, UBE2L6, MYADM, PLPP5, RRP12, VPREB3, AHNAK, ANKRD28, LIMK1, GGT5, PRSS23, SYNJ2, PNOC, ANKRD22, VAMP5, GNG7, PPP1R15A, POU2AF1, SFMBT1, SRBD1, EMP1, DPP4, POLD3, FAM241B, OXNAD1, FUZ, APOL2, EZR, FBX…
1	p36.22	rs12567136	11383731:12383731	CED	2.00217e-14	-0.0161178	0.00210658	3.5543e-18	-0.0156776	0.00180346	0.000127422	CED	2.95576e-05	-0.205016	0.0490843	0.179682	-0.059646	0.0444524	0.00158012		-0.0164651	0.00210464	5.14862e-15	-0.0157499	0.00180198	2.32461e-18	CLCN6	NPPA, MTHFR, MFN2, CLCN6
20	q13.32	rs73306876	57239829:58239829	CED	2.28019e-14	0.0185219	0.0024261	3.59912e-22	0.0201811	0.00208416	0.167169		0.271949	0.0467214	0.0425355	0.0321812	0.0854251	0.0398759	0.0151459		0.0186133	0.00242216	1.53483e-14	0.0203588	0.00208132	1.34922e-22	MRPS16P2, ZNF831	ZNF831
20	p12.3	rs6039216	8122480:9122480	CED	6.19106e-14	-0.0121632	0.00162076	9.41654e-11	-0.0090166	0.00139223	0.105823		0.981237	0.00101948	0.0433413	0.107042	0.0643823	0.0399483	0.141193		-0.0121448	0.00161963	6.4549e-14	-0.00892756	0.00139139	1.39617e-10	PLCB1	PLCB1
6	q22.33	rs62436817	126672542:127672542	CED	6.33226e-14	0.0117961	0.00157246	4.40274e-20	0.0123812	0.0013489	0.0212929		0.149196	-0.0411429	0.0285227	0.0192019	-0.06392	0.027298	0.012763		0.0116357	0.00157008	1.25437e-13	0.0121953	0.00134726	1.40389e-19	RPS4XP9, RSPO3
11	p11.2	rs4752977	46800429:47800429	CED	8.89617e-14	-0.0152261	0.00204186	1.52978e-08	-0.00994082	0.00175682	0.00526261		0.0203459	-0.0830154	0.0357838	0.692106	0.0131334	0.0331701	0.0194721		-0.0154461	0.00203854	3.53563e-14	-0.00987627	0.00175436	1.80674e-08	MADD	RAPSN, ACP2, NUP160, MYBPC3, C11orf49, PTPRJ, C1QTNF4, NR1H3, MADD, PSMC3, DDB2, SPI1
12	q24.21	rs35443	115052878:116052878	CED	1.02339e-12	-0.0113929	0.00159836	4.54101e-16	-0.0111575	0.00137342	0.269273		0.736311	-0.0112298	0.0333515	0.067051	0.0575045	0.0313941	0.0662247		-0.0113925	0.00159653	9.62151e-13	-0.0110263	0.00137211	9.27722e-16	RP11-25E2.1, RP11-116D17.2
15	q26.1	rs56340611	90907618:91907618	SSE	8.27167e-12	-0.0240129	0.00351361	0.000763928	-0.0101395	0.00301269	0.00272227		0.214867	0.0579198	0.0466977	0.598793	0.0238337	0.0452925	0.300152		-0.0235517	0.00350371	1.79334e-11	-0.00998985	0.00300605	0.000889748	RN7SL363P, FURIN	FES
15	q24.1	rs62006566	74586534:75586534	CED	1.28425e-11	-0.0114937	0.00169753	3.2936e-16	-0.0118795	0.00145532	0.00307783		0.175345	-0.0389238	0.028721	0.0193792	-0.0635896	0.0271964	0.00176121		-0.0115892	0.00169457	7.97464e-12	-0.0120271	0.00145324	1.27289e-16	CSK	FAM219B, SCAMP2, CSK, ULK3, MPI, PPCDC, SEMA7A, CCDC33, RPP25, CYP1A2
11	p11.2	rs7117386	47625371:48625371	CED	1.7981e-11	0.0128429	0.00191058	1.44632e-13	0.0121024	0.00163712	0.00600341		0.690589	-0.0134247	0.0337265	0.0149408	0.0764702	0.0314176	0.00522563		0.0127589	0.00190752	2.25135e-11	0.0122767	0.0016349	5.95181e-14	PTPRJ	NUP160, MYBPC3, ACP2, NR1H3, ENPEP, C1QTNF4, DDB2, PTPRJ
17	q21.32	rs8081301	46539302:47539302	CED	3.19276e-11	-0.0116594	0.0017565	0.0023513	-0.00458711	0.00150798	0.00225087		0.876738	0.00720399	0.0464213	0.0239761	0.097417	0.0431579	0.0381122		-0.0116324	0.00175524	3.4201e-11	-0.00446273	0.00150706	0.00306429	GIP	CALCOCO2, SNF8, IGF2BP1, GIP, SUMO2P17, HOXB2, TTLL6, UBE2Z, ATP5MC1
12	q21.33	rs11105381	89606835:90606835	AED	6.26199e-11	0.0130847	0.00200139	1.98962e-06	0.00818502	0.00172149	0.0470917	CED	0.00183251	-0.116312	0.0373261	0.0179187	-0.0840166	0.0354908	0.00767717		0.0127137	0.00199852	1.99683e-10	0.0079686	0.00171947	3.58078e-06	LINC00936, RNA5SP365	POC1B
1	p36.22	rs10864536	11324575:12324575	SSE	1.0723e-10	0.0115086	0.0017824	0.0402564	0.00313704	0.00152943	0.000155504		0.0163065	-0.0748065	0.0311436	0.648519	0.0133209	0.029238	0.018949		0.0112268	0.00177949	2.80833e-10	0.00316483	0.00152734	0.0382546	C1orf167	MTHFR, MFN2, CLCN6, PLOD1, NPPB, KIAA2013
12	q21.33	rs12229946	89819258:90819258	CED	1.32124e-10	0.0112663	0.00175347	4.91588e-08	0.0082057	0.00150438	0.0799419		0.217173	0.0355698	0.0288218	0.000473946	0.0950101	0.0271845	0.0024581		0.0113559	0.00175023	8.68498e-11	0.00847072	0.00150208	1.7072e-08	RP11-654D12.2	GALNT4
11	p11.2	rs10501320	46793799:47793799	CED	1.47347e-10	0.0113145	0.00176555	3.77659e-08	0.00832827	0.0015139	0.00338096		0.896682	0.0488949	0.376572	0.0111958	-1.80888	0.713135	0.0106215		0.0113153	0.00176553	1.46455e-10	0.00832008	0.0015139	3.88932e-08	MADD	ARHGAP1, ACP2, NUP160, MYBPC3, C1QTNF4, NR1H3, MADD, MTCH2, RTN1, PSMC3, GPER1, SPI1, AC090559.1, FNBP4
11	p11.2	rs7294154	48294660:49294660	CED	2.12211e-10	-0.014269	0.00224617	9.15873e-08	-0.0102708	0.00192233	0.0109243		0.569588	0.0211644	0.0372269	0.017052	0.082759	0.0346918	0.000218748		-0.0141405	0.00224209	2.8483e-10	-0.00998603	0.00191939	1.9639e-07	OR4A44P, RP11-56P9.5	NUP160, FOLH1B, ANKRD33B, ENPEP, PTPRJ
6	p21.33	rs2523578	30828542:31828542	CED	2.12549e-10	0.00993246	0.00156358	3.09217e-09	0.00792417	0.00133698	0.000633265		0.00191441	-0.09588	0.0308973	0.0750046	0.0507597	0.0285093	0.000243288		0.00966217	0.00156158	6.11541e-10	0.00801817	0.00133551	1.92733e-09	XXbac-BPG248L24.12, DHFRP2	FAM8A1, TSSC4, DDR1, OR13C3, LINC00243, LST1, HLA-DQA1, STK19B, HLA-H, CD8A, HLA-G, RNF5, CCHCR1, HLA-S, HLA-DRB5, NFKBIL1, HLA-A, ATP6V1G2, TUBB, GALNT2, BTN3A2, KLRK1, TCF19, HCG27, AL671883.2, PSMA4, PSORS1C2, POU5F1, CD248, MICA, HLA-C, HCP5, TNXA, LY6G5B, IER3, CYP21A1P, PSORS1C3, SLC44A4, FLOT1, TNXB, PSORS1C1, HLA-DQB1, BAG6, HLA-DRA, DDAH2, HLA-DRB1, TMEM154, C4B, TSBP1, NCR3, PBX2, LY6G5…
1	p13.2	rs72699046	112538761:113538761	CED	3.01749e-10	0.0190616	0.00302649	2.76162e-14	0.0197972	0.00260161	0.0531816		0.00766356	0.152309	0.0571203	0.536675	-0.0358044	0.0579501	0.010393		0.0194346	0.00302225	1.27173e-10	0.0196854	0.00259899	3.61267e-14	WNT2B	ST7L
13	q12.3	rs7328697	31666025:32666025	SSE	3.48994e-10	-0.0101769	0.00162164	0.849451	0.000263094	0.00138603	9.88486e-07		0.00485715	0.105324	0.0373985	0.713048	-0.0134085	0.0364601	0.0115057		-0.00996015	0.00162012	7.85693e-10	0.000243365	0.00138503	0.860521	B3GALTL, RXFP2
12	q24.21	rs7964325	114868787:115868787	SSE	4.5462e-10	-0.0105658	0.00169476	0.00198637	-0.00450831	0.00145791	0.000399566		0.591727	0.0181935	0.0339324	0.051549	0.0619226	0.0318053	0.11573		-0.0104942	0.00169265	5.65041e-10	-0.00436902	0.00145638	0.00270054	RP4-601P9.1, RP11-25E2.1
11	p11.12	rs7121968	48812255:49812255	CED	9.53111e-10	-0.0133659	0.0021849	9.7338e-07	-0.00917016	0.00187257	0.0243442		0.535005	0.0416792	0.0671836	0.0353802	-0.142261	0.0676154	0.0268186		-0.0133077	0.00218375	1.10124e-09	-0.00927216	0.00187185	7.29025e-07	FOLH1, CTD-2026G22.1	FOLH1B, TRIM51DP, ANKRD33B, ENPEP, FOLH1
3	p24.1	rs2643826	27062988:28062988	CED	9.95923e-10	0.00958984	0.00156943	4.89938e-18	0.0116455	0.00134529	0.123061		0.0237879	0.09059	0.0400705	0.776851	0.0109399	0.038612	0.0379678		0.00971391	0.00156823	5.85839e-10	0.0116446	0.00134447	4.67176e-18	RNU1-96P, AC137675.1	NEK10, SLC4A7
17	q21.33	rs17637472	46961433:47961433	CED	1.49003e-09	0.00967651	0.00160054	8.08108e-10	0.00843548	0.00137304	0.00697927		0.0909823	0.0624864	0.0369677	0.00415138	0.0997639	0.0348079	0.0458396		0.00977532	0.00159904	9.76322e-10	0.00857737	0.00137197	4.05624e-10	RP11-81K2.1	GNGT2, PHOSPHO1
4	q24	rs13107325	102688709:103688709	CED	1.88869e-09	-0.0176929	0.00294517	4.97181e-05	-0.0103766	0.00255769	0.049413		0.00203712	-0.117711	0.0381589	0.19872	-0.0459382	0.0357431	0.0309646		-0.0182852	0.00293644	4.75461e-10	-0.0105578	0.00255117	3.49726e-05	SLC39A8	SLC39A8
6	p22.2	rs2032451	25592170:26592170	CED	2.8756e-09	0.0128767	0.00216821	1.38319e-15	0.0148402	0.0018579	0.0393605		0.241956	0.0546208	0.0466864	0.00533716	0.1201	0.0431112	0.015733		0.0129665	0.00216588	2.14083e-09	0.0150353	0.00185618	5.48876e-16	HFE	BTN3A2, TRIM38, HIST1H3E, HIST1H3G, HIST1H2AE, HIST1H3F
10	q25.3	rs1801253	115305056:116305056	CED	3.45256e-09	0.0105184	0.00178012	7.78793e-19	0.0135292	0.00152632	0.0201739	AED	0.384765	-0.0287946	0.0331301	0.0101548	-0.0806961	0.0313933	0.0396048		0.0104052	0.00177756	4.80838e-09	0.013307	0.00152452	2.57734e-18	ADRB1	VWA2, ADRB1
10	p12.31	rs12258967	18227959:19227959	CED	4.39516e-09	-0.0101685	0.0017326	7.44389e-15	-0.0115549	0.00148572	0.0305138		0.0823968	-0.054867	0.0315885	0.0189076	-0.0705105	0.0300384	0.00878752		-0.0103026	0.00173	2.59685e-09	-0.0116988	0.00148391	3.17647e-15	CACNB2	NSUN6
4	q21.21	rs56190605	80662062:81662062	CED	4.97743e-09	-0.0127137	0.00217394	2.02857e-08	-0.0104863	0.00186929	0.00788617		0.687937	-0.0280446	0.0698204	0.000992974	-0.236177	0.0717319	0.0187992		-0.0127285	0.00217289	4.68765e-09	-0.0106395	0.00186866	1.24356e-08	PRDM8, FGF5	PRDM8
17	q23.3	rs4277405	61048918:62048918	CED	5.40002e-09	-0.0093856	0.00160859	8.24674e-13	-0.00991387	0.00138511	0.124175		0.814974	0.00694582	0.0296636	0.069906	0.050522	0.0278779	0.142204		-0.00933772	0.00160623	6.12033e-09	-0.00976505	0.0013834	1.68054e-12	RP11-269G24.6, CTD-2501B8.5	KCNH6, TANC2, ACE, FTSJ3
5	q33.3	rs7720047	156923813:157923813	CED	6.00304e-09	0.0102486	0.00176185	7.76567e-12	0.0103601	0.00151392	0.120385		1.76822e-05	0.129624	0.0302013	0.230843	-0.0349911	0.0292056	4.46063e-05		0.0106535	0.00175886	1.38651e-09	0.0102386	0.00151189	1.26987e-11	MARK2P11, CTB-47B8.4
12	q13.12	rs7302981	50037815:51037815	CED	7.25801e-09	-0.00931325	0.00160986	3.42488e-05	-0.00572685	0.00138219	0.00464997		0.250862	0.0342662	0.0298405	0.00128513	0.0892738	0.0277303	0.0470342		-0.00918678	0.00160752	1.09788e-08	-0.00549141	0.00138048	6.95232e-05	CERS5	AC074032.1, COX14, DIP2B, ATF1, CERS5, LIMA1, SMARCD1
9	q31.3	rs12347096	112647957:113647957	CED	8.34455e-09	0.0247926	0.00430305	6.41659e-05	0.0148206	0.00370791	0.053014		0.0211878	0.102114	0.0443046	0.115543	0.0663868	0.0421843	0.056283		0.0255152	0.0042829	2.56196e-09	0.0152159	0.00369367	3.79749e-05	SVEP1
12	q24.13	rs7953257	112184221:113184221	CED	1.00573e-08	-0.00924184	0.00161287	6.41395e-11	-0.0090279	0.00138165	0.192641		0.00297205	-0.090888	0.0305959	0.732156	0.00981171	0.0286601	0.00176121		-0.0094681	0.00161063	4.14021e-09	-0.00898422	0.00138005	7.5111e-11	HECTD4	MAPKAPK5-AS1, TMEM116, PHETA1, ALDH2, SH2B3
11	p11.12	rs61463018	50173092:51173092	CED	1.07646e-08	-0.0125867	0.00220105	2.58448e-07	-0.00972709	0.00188815	0.0432976		0.556022	0.0232184	0.0394285	0.00255939	0.109957	0.0364578	0.00759944		-0.0124755	0.00219763	1.37249e-08	-0.00940693	0.00188562	6.07661e-07	RP11-574M7.2, AC110283.1
11	p11.2	rs4752931	46262516:47262516	CED	1.07934e-08	-0.0130991	0.00229083	0.000358509	-0.00699159	0.00195901	0.0400416		0.954098	0.00198802	0.0344589	0.0746803	0.0576555	0.0323487	0.0318076		-0.0130327	0.00228578	1.18662e-08	-0.00675537	0.00195543	0.000550955	F2, CKAP5	LRP4, ACP2, CKAP5, F2, C11orf49, NR1H3, C1QTNF4, DDB2, MYBPC3, ZNF408
18	q21.2	rs11876341	48299991:49299991	CED	1.16962e-08	0.00969874	0.00170023	3.14542e-06	0.00679837	0.00145849	0.0169647		0.0793389	-0.0557146	0.0317524	0.0258586	0.0663494	0.029772	0.00226974		0.00951172	0.0016978	2.11419e-08	0.00694094	0.00145674	1.89135e-06	MEX3C, RNU1-46P	ME2
17	q21.32	rs4363897	46315947:47315947	CED	1.99739e-08	0.0207221	0.00369214	0.000908183	0.0105849	0.00319055	0.00478738		0.433933	-0.100834	0.128864	0.0248906	0.240614	0.10727	0.0208527		0.0206224	0.00369063	2.29994e-08	0.0107882	0.00318914	0.000717513	CTD-2377D24.4, TTLL6
3	p21.31	rs6442105	47682326:48682326	CED	2.16703e-08	-0.0095982	0.00171446	5.67206e-05	-0.00594045	0.00147547	0.0910854		0.0126003	-0.192664	0.0772243	0.224008	-0.0866991	0.0713009	0.00565525		-0.00968839	0.00171404	1.58244e-08	-0.00597502	0.00147515	5.11222e-05	RP11-1029M24.1, CDC25A	MAP4, MRPS18AP1, SPINK8, ZNF589, WDR6, QRICH1, NME6, CDC25A, TREX1, NCKIPSD, CSPG5, FCF1P2, SHISA5, DHX30
16	p12.3	rs77924615	19892332:20892332	CED	2.17194e-08	-0.0110554	0.00197488	2.61013e-15	-0.0133845	0.00169233	0.23181		0.27969	0.0366597	0.0339069	0.136709	-0.048323	0.0324726	0.0351377		-0.0108941	0.00197154	3.28224e-08	-0.0134791	0.00169004	1.51582e-15	PDILT
2	q36.3	rs2673142	226656645:227656645	SSE	2.31497e-08	0.00902976	0.00161623	0.259537	0.00156271	0.00138601	0.000376366		0.331119	0.0285583	0.0293795	0.00234547	0.0841665	0.0276641	0.0184005		0.00908868	0.00161379	1.78249e-08	0.00176954	0.00138427	0.201138	AC068138.1, MIR5702
2	q13	rs11692391	113195120:114195120	CED	2.32177e-08	-0.0105719	0.00189243	0.00531942	-0.00452918	0.00162507	0.00812411		0.00232529	-0.125831	0.0413214	0.262063	-0.0435716	0.0388504	0.022251		-0.0108131	0.00189045	1.06598e-08	-0.00459737	0.00162365	0.00463297	AC079753.5, IL36G	POLR1B, MERTK, PAX8, IL37, SLC20A1
12	q24.31	rs58609847	121391994:122391994	CED	2.83671e-08	-0.00882138	0.00158901	1.05194e-09	-0.00832646	0.00136463	0.108511		0.0977187	-0.0492344	0.0297319	0.0431925	-0.0575889	0.0284834	0.0679094		-0.00893648	0.00158675	1.78175e-08	-0.00843927	0.00136307	5.96364e-10	KDM2B	AC048337.1, ANAPC5, RNF34, MORN3, KDM2B
11	p15.5	rs4980379	1388614:2388614	CED	3.35298e-08	0.00895503	0.00162164	1.29724e-20	0.0129732	0.00139354	0.0167671		0.0254139	-0.0659027	0.0294862	0.598639	-0.0145717	0.027686	0.012763		0.0087293	0.00161919	7.00121e-08	0.0129036	0.00139178	1.83891e-20	LSP1	LSP1, MRPL23, TNNI2, TNNT3, MRPL23-AS1
11	p11.12	rs11246486	50792160:51792160	CED	3.42523e-08	-0.0126046	0.00228409	1.90946e-07	-0.0102025	0.00195896	0.0224671		0.687173	-0.0258934	0.0643014	0.0347719	0.123553	0.0585255	0.0422562		-0.0126213	0.00228265	3.21601e-08	-0.0100528	0.00195786	2.82771e-07	AC110283.1, OR4A6P	ENPEP, FOLH1B, AC024405.1
16	q12.2	rs55872725	53309123:54309123	CED	4.07673e-08	0.008716	0.00158826	1.07919e-10	0.00879951	0.00136304	0.118187		0.0032505	0.0846628	0.0287686	0.828521	-0.00590741	0.0272754	0.0107731		0.00894678	0.00158585	1.68431e-08	0.00876287	0.00136134	1.21905e-10	FTO
11	q11	rs11229818	54732549:55732549	CED	5.14541e-08	-0.0124848	0.00229228	2.33284e-07	-0.0101679	0.0019664	0.00247756		0.122097	-0.0485119	0.0313768	0.0144475	-0.0731407	0.029903	0.00163959		-0.0126761	0.00228619	2.94574e-08	-0.010439	0.00196216	1.03669e-07	OR4A17P, OR4A13P	OR4A15
6	q25.1	rs57139556	150498511:151498511	CED	5.69945e-08	-0.016435	0.00302769	3.02034e-18	-0.0225505	0.00258857	0.0153371		0.147244	-0.0535094	0.0369194	0.00139712	-0.11488	0.0359534	0.0684092		-0.0166827	0.00301756	3.22925e-08	-0.0230266	0.00258189	4.7251e-19	PLEKHG1
11	p11.12	rs12794900	49376651:50376651	CED	8.33543e-08	-0.0109139	0.00203619	7.70771e-05	-0.00691514	0.00174916	0.0209153		0.00573442	0.814386	0.294791	0.636518	0.188751	0.399412	0.0190992		-0.0108745	0.00203614	9.25617e-08	-0.00691139	0.00174914	7.77282e-05	RP11-163O19.11	FOLH1B, TRIM51DP, ANKRD33B, ENPEP
9	q34.2	rs10993958	136035677:137035677	CED	8.47136e-08	-0.0157304	0.0029364	8.24748e-06	-0.0112749	0.0025287	0.073872		0.477967	0.0381432	0.0537648	0.152007	-0.076324	0.0532793	0.065233		-0.0155702	0.00293203	1.094e-07	-0.0114211	0.00252586	6.13529e-06	SARDH
11	q12.2	rs7931683	60763581:61763581	CED	9.57705e-08	-0.0130718	0.00245029	7.78707e-07	-0.0104201	0.00210899	0.0190177		0.586543	0.0255605	0.0469898	0.0181047	-0.109434	0.0463024	0.0191998		-0.012967	0.00244697	1.1629e-07	-0.0106251	0.00210681	4.57753e-07	PPP1R32, RP11-286N22.10	SYT7
5	q32	rs1078721	147857999:148857999	CED	1.03756e-07	-0.0107256	0.002016	0.000177925	-0.0064994	0.00173385	0.00196544		0.803867	-0.00714043	0.0287504	0.00558218	-0.0757089	0.0273185	0.0419111		-0.0107081	0.00201106	1.01187e-07	-0.00677707	0.00173037	8.98259e-05	SH3TC2	ABLIM3
6	p22.2	rs1321250	25142244:26142244	CED	1.07939e-07	0.0157717	0.00296849	8.44682e-06	0.0113187	0.00254144	0.0357669		0.876493	0.00823599	0.0530227	0.0222435	0.109177	0.0477563	0.0152304		0.0157482	0.00296385	1.0759e-07	0.0115951	0.00253785	4.90402e-06	LRRC16A, SCGN	BTN3A2, HIST1H2BD
4	q23	rs1229984	99739319:100739319	AED	1.22075e-07	0.0276398	0.00522434	0.00177188	0.0142495	0.00455829	0.0241545		0.0286971	-0.241886	0.11057	0.798798	-0.0247774	0.0972021	0.00445689		0.0270394	0.00521852	2.20181e-07	0.0141639	0.00455329	0.00186651	ADH1B
8	q22.3	rs35783704	105466258:106466258	CED	1.33393e-07	-0.0137451	0.00260604	9.59757e-11	-0.0144874	0.00223795	0.0161924		0.00775904	0.0857923	0.0322218	0.781047	0.0086128	0.0310074	0.0211935		-0.0130982	0.00259756	4.5945e-07	-0.0143677	0.00223214	1.22081e-10	RP11-127H5.1
5	q33.3	rs7701003	157324481:158324481	SSE	1.50872e-07	-0.00847887	0.00161449	5.64091e-23	-0.0136636	0.00138424	0.000758086		0.540523	-0.0279623	0.0456879	0.00540469	0.114123	0.0410248	0.00816009		-0.00850317	0.00161348	1.36371e-07	-0.0135183	0.00138345	1.49361e-22	CTC-436K13.2, RP11-542A14.1
3	p21.1	rs11714712	53350855:54350855	CED	1.79497e-07	0.00820013	0.00157102	9.18105e-05	0.00525841	0.00134439	0.0153049		0.00779808	-0.0880894	0.033108	0.7291	-0.0106748	0.0308256	0.0198535		0.00798381	0.00156925	3.62537e-07	0.00522816	0.00134311	9.91882e-05	CHDH	PIANP
11	p15.5	rs907613	1374292:2374292	CED	2.10072e-07	0.00870672	0.00167746	5.07843e-11	0.00943718	0.00143663	0.199541		0.383725	0.0266517	0.030591	0.449068	0.0217908	0.028786	0.315172		0.00876052	0.00167494	1.69203e-07	0.00946787	0.00143484	4.15234e-11	LSP1	LSP1, MRPL23, TNNI2, CTSD, TNNT3, PRR33
10	q25.3	rs180940	115222411:116222411	CED	2.13236e-07	0.00864516	0.0016665	8.36123e-08	0.00766147	0.00142955	0.177181		0.268004	0.0338409	0.0305502	0.0266232	-0.0642122	0.0289636	0.0099246		0.00871991	0.00166403	1.6036e-07	0.0074868	0.00142781	1.57515e-07	NHLRC2, ADRB1	CASP7
6	p22.2	rs1155207	25828365:26828365	CED	2.98379e-07	-0.00801041	0.00156311	1.97848e-10	-0.00854015	0.00134209	0.0772574		0.518517	-0.100732	0.15602	0.01252	0.325144	0.130206	0.0180542		-0.00801972	0.00156303	2.88402e-07	-0.0085047	0.00134202	2.33909e-10	HIST1H3PS1, RNU6-1259P	BTN3A2, HIST1H4H, HIST1H3E, BTN3A1, HIST1H2BK, HIST1H4E, HIST1H2AE, BTN2A1, HIST1H4C, HIST1H2BD, B4GAT1, SLC17A3
6	p21.32	rs3131296	31672993:32672993	AED	3.02119e-07	0.00859174	0.00167731	3.13418e-08	0.00797186	0.00144052	0.00424685		9.18719e-05	-0.121628	0.0310978	0.188849	-0.0382306	0.0290939	0.0076007		0.00821401	0.00167488	9.37844e-07	0.00785887	0.00143876	4.70105e-08	NOTCH4	ATF6B, CLIC1, TRBV5-1, HLA-DQA1, TRBV19, TRAV12-1, HLA-H, TRAV17, HLA-G, RNF5, TRBV2, DDX39B, GPSM3, HLA-DRB5, TUBB, HLA-S, TRAV21, BTN3A2, HLA-DOB, HLA-DQB1-AS1, TRAV8-1, MSH5, GPANK1, XRCC6, RNF5P1, HLA-C, HLA-DMA, HCP5, C4A, VWA7, TNXA, TRAV13-1, IER3, PRRT1, CYP21A1P, SLC44A4, TRAV35, TNXB, FLOT1, TRAV12-2, HLA-DQB1, BAG6, HLA-DPB2, HLA-DRB1, C4B, TRBV20-1, HLA-DQB2, TRAV26-1, PSMB9, TSBP1, P…
2	p14	rs2249105	64787896:65787896	CED	4.54098e-07	0.0080867	0.00160293	0.322216	0.00136947	0.00138342	0.000449123		0.938566	0.00228738	0.0296492	0.0296426	-0.0610895	0.0280895	0.0274529		0.0080698	0.00160059	4.61277e-07	0.00121834	0.00138175	0.377919	CEP68	RAB1A, SLC1A4, CEP68
7	q34	rs73158615	138937466:139937466	CED	5.12159e-07	-0.0105687	0.00210452	1.62513e-05	-0.00779338	0.00180774	0.101178		0.0119517	-0.10792	0.0429352	0.860464	-0.00691082	0.0393132	0.00764928		-0.010802	0.002102	2.76291e-07	-0.00779152	0.00180583	1.59862e-05	HIPK2
17	q25.3	rs1436138	74816880:75816880	CED	5.89378e-07	-0.00814513	0.0016307	6.30253e-11	-0.00912504	0.00139596	0.147645		0.476253	-0.0205048	0.0287873	0.0729906	0.0490378	0.0273475	0.0386158		-0.00818466	0.00162809	4.97806e-07	-0.00897388	0.00139414	1.21988e-10	SEPT9	SEPT9
17	q23.2	rs1476781	58976415:59976415	CED	8.82118e-07	0.0091734	0.00186586	0.0223843	0.00366273	0.00160379	0.00419535		0.312082	-0.0318839	0.0315421	0.00154242	-0.0964823	0.0304688	0.0138572		0.00903023	0.0018626	1.24602e-06	0.00338603	0.00160157	0.0344991	RP11-332H18.4	AC005746.2, TBX2, TBX2-AS1
1	p36.23	rs1763839	7973336:8973336	CED	1.05582e-06	0.00773424	0.00158452	0.000305348	0.00490964	0.00135971	0.0152457		0.242411	-0.0455174	0.0389386	0.00660415	-0.102672	0.0378004	0.00870148		0.00764621	0.00158321	1.36835e-06	0.00477062	0.00135883	0.000446716	RERE	ENO1, CA6, PRXL2B, SLC45A1, RERE
15	q25.1	rs2062316	80510249:81510249	CED	1.05781e-06	0.00760772	0.00155872	5.44014e-10	0.00831297	0.00133947	0.168812		0.0033152	0.0987044	0.0336116	0.381853	0.0282861	0.0323519	0.0573962		0.00780321	0.00155705	5.39944e-07	0.00834715	0.00133832	4.45985e-10	ABHD17C	ARNT2, ABHD17C
14	q21.3	rs72681869	50155357:51155357	CED	1.1533e-06	-0.0362511	0.00745344	3.64883e-08	-0.0348363	0.0063255	0.190845		0.325526	-0.0678924	0.0690552	0.044583	0.122633	0.061057	0.019369		-0.0366155	0.0074104	7.7686e-07	-0.0331641	0.00629183	1.35691e-07	SOS2
6	p21.33	rs3020644	31394626:32394626	CED	1.27184e-06	0.00787305	0.00162523	2.07316e-10	0.0088517	0.00139262	0.0394378	SSE_Female	0.00251833	-0.0909416	0.0301021	0.583095	-0.0155056	0.0282507	0.00717592		0.00758584	0.00162287	2.94888e-06	0.00879266	0.00139093	2.59175e-10	C2	EHMT2, C6orf48, ATF6B, LST1, HLA-DQA1, HLA-H, HLA-G, NELFE, HLA-S, HLA-DRB5, HLA-A, HSPA1B, AIF1, MICA, HLA-C, TNXA, CSNK2B, LY6G5B, CYP21A1P, PSORS1C3, SLC44A4, TNXB, MICB, HLA-DQB1, HLA-DRA, BAG6, DDAH2, HLA-DRB1, C4B, PRRC2A, TSBP1, PPT2, NCR3, PBX2, HSPA1A, VARS2, HLA-B, EGFL8, HLA-DRB6
7	p15.2	rs61056117	26745997:27745997	CED	1.38884e-06	0.0144085	0.00298511	1.46794e-14	0.0196923	0.00256047	0.0186661		0.0232465	-0.136918	0.0603331	0.396607	-0.0468914	0.055317	0.00146732		0.014039	0.00298146	2.49242e-06	0.0195499	0.00255773	2.11441e-14	HOTTIP
11	p11.2	rs10838163	43297428:44297428	SSE	1.40886e-06	-0.00814688	0.00168885	0.109193	-0.00231702	0.00144648	0.00368198		0.000382721	0.164828	0.0464057	0.575787	0.0254728	0.0455128	0.0160185		-0.00791808	0.00168773	2.71141e-06	-0.00228898	0.00144575	0.113365	HSD17B12
10	q24.32	rs76752100	104294086:105294086	CED	1.59217e-06	-0.0139336	0.00290315	2.36337e-14	-0.0191254	0.0025067	0.0710065		0.0166325	-0.130752	0.0546	0.467704	-0.0364119	0.0501381	0.00158012		-0.0142629	0.00289905	8.66072e-07	-0.0191685	0.00250357	1.91131e-14	CNNM2	SFXN2, BORCS7, AS3MT, NT5C2, ATP5MD, TRIM8, WBP1L, MFSD13A, CNNM2, ACTR1A
1	q21.3	rs35479618	153162423:154162423	AED	1.59704e-06	0.0286201	0.00596392	8.53731e-08	0.0275197	0.0051385	0.161121		0.0175667	-0.706881	0.297681	0.485294	0.141916	0.203377	0.00927745		0.028325	0.00596272	2.03069e-06	0.0275927	0.00513686	7.80816e-08	NPR1	S100A13
12	p12.2	rs7972957	19664203:20664203	CED	1.68171e-06	-0.00841262	0.00175684	4.04093e-07	-0.00761143	0.0015021	0.0453778		0.000643623	-0.272849	0.0799553	0.395234	-0.0583889	0.0686794	0.000448957		-0.00854023	0.00175642	1.16027e-06	-0.00763571	0.00150174	3.68458e-07	RP11-405A12.2, RP11-664H17.1	LINC02398
16	q23.2	rs2966114	81091248:82091248	CED	1.81542e-06	-0.00774582	0.0016228	1.36466e-09	-0.00845075	0.00139454	0.235522		0.0169557	0.125998	0.0527673	0.676102	-0.0222497	0.0532575	0.00421662		-0.00761944	0.00162203	2.6341e-06	-0.0084602	0.00139406	1.28915e-09	CMIP
5	p13.3	rs62369525	32219811:33219811	CED	1.82907e-06	0.00785982	0.0016472	3.64956e-10	0.00884928	0.00141167	0.147873		0.00422393	-0.102096	0.0356862	0.650466	0.0148788	0.0328361	0.00792996		0.00762605	0.00164545	3.57568e-06	0.0088604	0.00141037	3.33519e-10	NPR3
20	p12.2	rs6040220	10364516:11364516	AED	2.07481e-06	-0.00745986	0.00157177	3.1366e-07	-0.00689814	0.00134855	0.372913		0.969221	0.00176844	0.0459282	0.0789667	0.074959	0.0426665	0.084267		-0.00744906	0.00157085	2.11557e-06	-0.00681645	0.00134788	4.25516e-07	RP4-697P8.3
11	p11.2	rs3837374	47328404:48328404	AED	2.14538e-06	-0.00744956	0.00157184	0.181349	-0.00180341	0.00134923	0.00641776		0.0398537	-0.0592321	0.0288196	0.546751	-0.0165146	0.0274057	0.0121051		-0.00760314	0.00156951	1.27069e-06	-0.00183898	0.0013476	0.172368	NUP160	NUP160, MYBPC3, C1QTNF4, NR1H3, OR4X1, MTCH2, FNBP4, PSMC3, SPI1, PTPMT1, CELF1
8	q22.1	rs74900445	94768903:95768903	AED	2.2428e-06	0.0144316	0.00305084	0.490838	0.00179152	0.00260026	0.00161474		0.436294	0.0226711	0.0291148	0.211409	-0.0346763	0.0277459	0.0769481		0.0145211	0.00303423	1.7034e-06	0.00147402	0.00258892	0.569114	GEM	RAD54B
6	q14.1	rs7753358	79165210:80165210	CED	2.31779e-06	0.00737321	0.0015609	0.00046287	0.0046821	0.0013372	0.06338		0.760767	0.00888045	0.0291734	0.0026793	-0.0827123	0.0275495	0.00090035		0.00737751	0.00155867	2.20999e-06	0.00447669	0.00133563	0.000803031	PHIP	PHIP, IRAK1BP1
4	q21.23	rs1563000	86247929:87247929	CED	2.3246e-06	0.011785	0.00249519	0.0139128	0.00525228	0.00213548	0.0181833		0.0180902	-0.159749	0.0675823	0.326302	0.0580991	0.0591834	0.0076538		0.0115515	0.00249349	3.60999e-06	0.00532099	0.00213409	0.0126551	ARHGAP24	ARHGAP24
12	q13.11	rs11168250	47709165:48709165	CED	2.51254e-06	-0.00847732	0.0018009	5.62618e-05	-0.00620103	0.00153946	0.16951		0.0948562	0.0602857	0.0360939	0.000295045	-0.129419	0.035755	8.40042e-05		-0.00830656	0.00179866	3.87108e-06	-0.00642903	0.00153804	2.91474e-05	HDAC7	HDAC7, RPAP3, RAPGEF3, AC004241.1, SLC48A1
10	p12.31	rs11012732	21330104:22330104	CED	2.7252e-06	0.00732376	0.00156134	0.0640904	0.00248221	0.0013406	0.00551154		0.0114045	0.112069	0.0442983	0.00554419	-0.124735	0.0449726	8.79611e-05		0.00745372	0.00156037	1.78027e-06	0.00236927	0.00134	0.0770437	MLLT10	NEBL, MLLT10
3	q26.2	rs9850919	168677924:169677924	CED	2.99689e-06	0.00739451	0.001583	3.71061e-08	0.00748316	0.00135951	0.195045		0.140608	0.0477325	0.0323965	0.00245257	-0.0950021	0.031363	0.000621595		0.00749059	0.00158111	2.16326e-06	0.00729095	0.00135823	7.96319e-08	RP11-641D5.2
7	q32.2	rs11556924	129163496:130163496	CED	3.19623e-06	-0.00742396	0.00159383	3.34791e-09	-0.00812083	0.00137319	0.127093		0.80461	-0.0072341	0.0292448	0.0289935	-0.0614064	0.0281218	0.0909039		-0.0074234	0.00159147	3.09374e-06	-0.00824758	0.00137156	1.81781e-09	ZC3HC1	DSC1, KLHDC10
5	q33.3	rs2161356	157904129:158904129	CED	3.8518e-06	-0.0075099	0.00162574	1.14218e-08	-0.00794948	0.0013926	0.0147461		0.0548473	0.0581085	0.0302608	0.601833	-0.0151959	0.0291213	0.0404525		-0.00732105	0.0016234	6.49177e-06	-0.00796601	0.00139101	1.02354e-08	EBF1	EBF1
17	q21.32	rs17608766	44513271:45513271	CED	4.38956e-06	0.010387	0.00226189	4.81414e-08	0.0106309	0.00194768	0.020753		0.607943	-0.0151989	0.0296265	0.000623349	0.095092	0.0277934	0.00323045		0.0102387	0.00225533	5.6308e-06	0.0110436	0.00194292	1.31535e-08	RP11-156P1.2	FAM215B, LRRC37A, RPRML, GOSR2, ARL17B, NSFP1
19	p13.11	rs10421727	16725128:17725128	CED	4.5972e-06	0.00784619	0.0017122	3.00584e-09	0.00873963	0.00147341	0.025218		0.413388	-0.025244	0.0308606	0.00723551	0.0776645	0.0289159	0.00747982		0.00774464	0.00170957	5.89366e-06	0.00891812	0.0014715	1.35646e-09	MYO9B	NR2F6, CPAMD8, HAUS8, OCEL1, MYO9B
9	q34.2	rs115478735	135649711:136649711	CED	4.74419e-06	-0.00918644	0.00200755	3.95212e-05	-0.00711181	0.00173022	0.113595		0.00143416	0.0961553	0.0301598	0.87057	-0.00470405	0.0288703	0.00421662		-0.00872176	0.00200312	1.3362e-05	-0.00710319	0.00172712	3.90998e-05	ABO	ABO
15	q23	rs117539635	69182916:70182916	CED	4.8582e-06	-0.0227107	0.00496847	4.38064e-05	-0.017525	0.0042885	0.147771		0.001084	-0.33997	0.104037	0.560248	-0.0514375	0.0883078	0.017242		-0.0234326	0.00496281	2.3395e-06	-0.0176048	0.00428345	3.95738e-05	PAQR5	PAQR5
7	q32.3	rs11767602	130691691:131691691	CED	4.89239e-06	-0.0132138	0.00289174	0.096147	-0.004145	0.00249124	0.0163677		0.694622	0.0249657	0.0635772	0.00057506	0.196882	0.0571773	0.00621863		-0.013135	0.00288875	5.44325e-06	-0.0037641	0.00248888	0.130441	PODXL	MKLN1
7	q36.1	rs891511	150204843:151204843	CED	5.06879e-06	-0.00770561	0.00168906	2.45761e-09	-0.00862272	0.00144567	0.137293		0.0208478	-0.0798953	0.0345757	0.579773	-0.0178107	0.032165	0.0271094		-0.00787747	0.00168705	3.02105e-06	-0.00864124	0.00144421	2.18578e-09	NOS3	NOS3, AGAP3, TMEM176A, ATG9B
12	q24.13	rs2189271	112700293:113700293	CED	5.92842e-06	-0.0071468	0.00157798	0.0093356	-0.00352052	0.00135429	0.0254131		0.0204634	-0.0727772	0.0314003	0.987193	-0.00047011	0.0293145	0.0461646		-0.00731213	0.00157599	3.48914e-06	-0.00351402	0.00135285	0.00939045	RPH3A	OAS1
20	p12.2	rs78845099	10243612:11243612	CED	5.98234e-06	0.00738889	0.00163213	1.60285e-10	0.00895154	0.00139964	0.117963		0.0340765	0.0621012	0.0293024	0.410602	-0.0230537	0.0280163	0.0178432		0.00755811	0.0016296	3.51793e-06	0.00887186	0.0013979	2.20157e-10	RP1-278O22.2
6	q16.1	rs4346856	96380270:97380270	CED	6.70712e-06	-0.0094845	0.0021063	0.00304548	-0.00533517	0.00180051	0.022279		0.0683081	-0.0682628	0.0374444	0.463486	0.0251413	0.0342915	0.0087322		-0.0096699	0.00210298	4.26158e-06	-0.00525138	0.00179803	0.0034933	UFL1-AS1	UFL1
6	p21.33	rs1077394	31110384:32110384	CED	8.91129e-06	0.00736572	0.00165814	4.23157e-10	0.008887	0.00142293	0.0165574		0.00796715	-0.110366	0.0415934	0.808811	-0.00925873	0.0382659	0.00229368		0.00717891	0.00165682	1.47135e-05	0.00886194	0.00142195	4.59756e-10	BAG6	C6orf48, DDR1, ATF6B, HLA-DQA1, RNF5, CCHCR1, ATP6V1G2, HLA-DRB5, HSPA1B, HCG27, GPANK1, AIF1, MSH5, MICA, HLA-C, HCP5, AGPAT1, C4A, CSNK2B, LY6G5B, IER3, TNXB, HLA-DQB1, BAG6, HLA-DRA, HLA-DRB1, C4B, PSMB9, PRRC2A, CYP21A2, SLC7A9, LY6G5C, HSPA1A, HLA-B, HLA-DRB6
12	p11.23	rs1098708	26821112:27821112	CED	9.97574e-06	0.00689855	0.00156152	0.000163707	0.00505361	0.0013407	0.0339946		0.100007	-0.0716152	0.043542	0.00511981	0.109751	0.0392074	0.000847148		0.0067977	0.00156052	1.32425e-05	0.00517589	0.00133992	0.000112074	RP11-582E3.2, STK38L	MED21, TM7SF3, STK38L, C12orf71
12	q13.13	rs7134677	53941498:54941498	CED	1.02733e-05	-0.00762149	0.00172765	2.48125e-09	-0.00882967	0.00148075	0.0602915	CED	0.0302796	-0.0689139	0.0318101	0.00155355	-0.0958977	0.0303044	0.133633		-0.00780175	0.00172511	6.11209e-06	-0.00903705	0.00147899	9.94405e-10	HOXC4	HOXC4
7		rs236607	74571121:75571121	AED	1.14972e-05	0.00825427	0.00188151	1.08373e-06	0.00786207	0.00161242	0.00427209		0.00134467	0.0926521	0.0288976	0.869738	0.00447995	0.0273187	0.00118373		0.00861054	0.00187753	4.51624e-06	0.00785033	0.00160962	1.07638e-06
11	p15.4	rs4910498	9265503:10265503	CED	1.21168e-05	0.00711745	0.00162662	8.33053e-14	0.0104383	0.00139819	0.00750879		0.816615	0.00728341	0.0314	0.0275862	0.0647385	0.0293854	0.0135666		0.00711789	0.00162444	1.17731e-05	0.010561	0.00139661	3.97374e-14	SWAP70	SBF2, WEE1, ADM, SWAP70
4	p15.2	rs28667801	26285356:27285356	CED	1.36671e-05	0.00693837	0.00159529	1.2227e-10	0.00880355	0.00136768	0.171372		0.0520375	0.0568812	0.0292739	0.0354413	-0.0587993	0.0279558	0.00213266		0.00708625	0.00159293	8.64431e-06	0.00864213	0.00136605	2.50974e-10	TBC1D19, STIM2
10	q25.1	rs574277571	105789667:106789667	SSE	1.40753e-05	0.0308535	0.00710451	1.47938e-12	0.0428972	0.00606161	0.00802556		0.462729	0.0834216	0.113603	0.0152585	0.245351	0.101124	0.012065		0.0310583	0.00709066	1.18586e-05	0.043622	0.00605075	5.62157e-13	RP11-127O4.3, RP11-127O4.2
6	p21.1	rs9394951	42850753:43850753	AED	1.55266e-05	-0.00677594	0.00156807	4.7552e-10	-0.00839172	0.00134757	0.0310283		0.063461	-0.0638742	0.0344179	0.676966	0.0133307	0.0319972	0.0502042		-0.00689421	0.00156645	1.07662e-05	-0.00835326	0.00134638	5.49576e-10	ZNF318, ABCC10	SLC22A7, CRIP3, PEX6, DNPH1, MAD2L1BP, PTK7
1	p13.2	rs57748895	115326169:116326169	CED	1.72145e-05	0.0251757	0.00585702	4.57235e-12	0.0350076	0.00505985	0.115747		0.204339	0.109509	0.0862771	0.00624601	0.215047	0.0786382	0.0348167		0.0255626	0.00584357	1.21723e-05	0.0357499	0.00504941	1.44135e-12	RP4-663N10.1
16	p13.3	rs139491786	1586421:2586421	CED	1.95012e-05	-0.039879	0.00933792	0.00019189	-0.0301054	0.00807218	0.203871		0.338974	-0.171518	0.179376	0.48407	-0.12213	0.174528	0.177561		-0.0402348	0.00932529	1.59902e-05	-0.0303018	0.00806356	0.000171363	SLC9A3R2
1	p13.2	rs351364	112545061:113545061	CED	2.02263e-05	0.0076587	0.00179676	8.11533e-14	0.0115115	0.00154125	0.094276		0.028963	-0.142956	0.0654566	0.917141	0.00610135	0.0586433	0.0375226		0.0075453	0.00179608	2.65769e-05	0.0115078	0.00154072	8.07496e-14	WNT2B	MOV10, RHOC, CTTNBP2NL, WNT2B
7	q22.3	rs2392929	105914069:106914069	CED	2.31005e-05	0.00879518	0.0020779	2.16196e-09	0.0106759	0.00178365	0.38992		0.214074	-0.0379833	0.0305725	0.00764416	0.075942	0.0284727	0.00319619		0.00858008	0.00207312	3.49225e-05	0.010931	0.00178016	8.22774e-10	CTB-111H14.1, RP5-884M6.1	CCDC71L, PRKAR2B, AC004917.1, LINC02577
15	q26.2	rs12906962	94812071:95812071	CED	2.39418e-05	0.00710008	0.00168062	4.861e-05	0.00586255	0.00144316	0.114693		0.584662	0.0224951	0.0411478	0.0175792	0.0920868	0.0387852	0.00953507		0.00712572	0.00167922	2.2009e-05	0.00598176	0.00144216	3.35722e-05	RP11-57P19.1, CTD-2576F9.1
19	p13.2	rs4804517	6906066:7906066	CED	2.41022e-05	-0.00698383	0.0016537	4.08133e-09	-0.0083403	0.00141815	0.179397		0.0511395	-0.0582278	0.0298566	0.00130557	0.0891824	0.0277372	8.96676e-05		-0.00714056	0.00165117	1.52846e-05	-0.00808603	0.0014163	1.13465e-08	AC125387.1, CTB-133G6.1
3	p21.1	rs3821843	53058012:54058012	CED	2.49707e-05	-0.00749039	0.001777	1.42381e-11	-0.0103186	0.00152736	0.0899802		0.725514	-0.0114726	0.0326772	0.104921	0.0497326	0.0306771	0.00796683		-0.00750213	0.00177438	2.35742e-05	-0.0101701	0.00152547	2.61322e-11	CACNA1D	TKT
17	p13.1	rs5418	6685092:7685092	CED	2.54431e-05	0.00663831	0.00157644	0.000169665	0.00507813	0.00135041	0.128335		0.0253246	-0.0654947	0.0292858	0.757305	0.00851366	0.0275616	0.0283811		0.0064299	0.00157416	4.41429e-05	0.00508636	0.00134879	0.000162564	SLC2A4	ACAP1, CLDN7, EIF5A, DLG4, ELP5, SLC2A4, ACADVL, CTDNEP1, GRAMD1C, DVL2
11	p15.4	rs56287081	9692992:10692992	CED	2.82488e-05	0.00837984	0.00200127	8.03128e-08	0.00924629	0.00172292	0.0670688		0.00398228	0.133018	0.0461958	0.994313	0.000329946	0.045721	0.0206017		0.00861332	0.00199939	1.64766e-05	0.00923365	0.0017217	8.18036e-08	SBF2	SBF2, ADM, SWAP70
1	p36.22	rs13305986	11408505:12408505	CED	2.99037e-05	-0.0132961	0.00318523	1.03702e-08	-0.0156293	0.0027301	0.374493		0.795599	-0.0150233	0.0579932	0.019038	-0.136257	0.058111	0.0656213		-0.0133013	0.00318044	2.88673e-05	-0.015895	0.00272709	5.59146e-09	NPPA, NPPB	NPPA, CLCN6
5	q15	rs6875109	95569295:96569295	CED	3.06471e-05	0.00909303	0.00218125	0.0357583	0.00391189	0.00186309	0.0673873		0.000294948	-0.131309	0.0362763	0.358047	-0.03085	0.0335682	0.0162922		0.00858724	0.00217732	8.01492e-05	0.00380514	0.00186023	0.0408033	CAST	AC008906.1, CAST, ERAP1, ERAP2
17	p13.2	rs67833703	3388437:4388437	CED	3.186e-05	0.00822113	0.0019763	0.000203066	0.00631525	0.00169982	0.0264961		0.702822	0.0134294	0.0351945	0.0197496	0.0760532	0.0326293	0.00435643		0.0082375	0.00197319	2.98366e-05	0.006504	0.00169752	0.000127377	RP11-459C13.1, ZZEF1	ZZEF1, ANKFY1, CYB5D2, UBE2G1
10	q23.33	rs7070115	95400004:96400004	CED	3.90155e-05	0.00648091	0.00157558	1.15844e-07	0.00716902	0.00135261	0.00289962		0.636617	0.0136662	0.0289287	0.0631707	0.0507121	0.0272892	0.104459		0.00650216	0.00157325	3.58132e-05	0.00727573	0.00135095	7.2189e-08	PLCE1
10	q24.31	rs10883543	102052752:103052752	CED	3.92435e-05	-0.00945164	0.00229855	0.0229627	-0.00448245	0.00197111	0.100778		0.00692913	-0.127723	0.0473011	0.69663	-0.0170434	0.0437167	0.0428632		-0.00973027	0.00229584	2.25305e-05	-0.00450793	0.00196911	0.0220604	PAX2	PAX2, SEC31B
4	q32.1	rs56329057	156133444:157133444	CED	4.02022e-05	-0.00823365	0.00200507	4.27044e-12	-0.0119832	0.00172958	0.00705506		0.0082019	-0.229651	0.0868695	0.102623	0.117001	0.0716802	0.00104222		-0.00835155	0.00200454	3.0955e-05	-0.0119081	0.00172908	5.69821e-12	GUCY1A3	GUCY1A1, AC104083.1
16	p11.2	rs9926533	30514179:31514179	CED	4.54565e-05	0.00656457	0.00160977	6.56922e-07	0.00685932	0.00137908	0.0536428		0.00842311	-0.0860177	0.0326491	0.750986	0.00976219	0.0307493	0.00502884		0.00634005	0.00160782	8.03798e-05	0.00686515	0.0013777	6.25842e-07	STX1B	CCDC189, PRR14, BCKDK, STX1B, ITGAX, HSD3B7, ZNF668, PHKG2, ITGAM, PRSS53, KAT8, ZNF646, ITGAD, MAPK3, STX4, ARMC5, VKORC1, SETD1A
3	p25.3	rs9840982	11064940:12064940	CED	4.80751e-05	0.00682391	0.00167874	3.8089e-07	0.00733585	0.00144451	0.108998		0.039796	-0.0630953	0.0306904	0.00594295	-0.0800318	0.029093	0.0348738		0.00661534	0.00167623	7.92866e-05	0.00712099	0.00144273	7.98358e-07	ATG7	ATG7, HRH1, VGLL4
11	q13.3	rs72930288	68565991:69565991	CED	5.14463e-05	-0.00776403	0.00191749	0.0615045	-0.00308214	0.00164833	0.0640858		0.741149	-0.0239331	0.0724507	0.0436369	-0.145203	0.0719694	0.0751292		-0.00777535	0.00191682	4.98389e-05	-0.00315665	0.0016479	0.0554208	MYEOV
1	p22.2	rs10493818	88833557:89833557	CED	5.21008e-05	0.0064886	0.00160367	4.33213e-09	0.00806513	0.00137366	0.0418636		0.0171524	0.18667	0.0783226	0.773453	-0.0224829	0.0781042	0.011434		0.00656411	0.00160333	4.23929e-05	0.00805568	0.00137345	4.48318e-09	GTF2B	KCNJ10, GTF2B, KYAT3, RBMXL1, GBP3
17	q21.31	rs62071370	43944802:44944802	CED	6.16289e-05	0.0084498	0.00210898	0.0269977	0.00400524	0.00181104	0.0439011		0.363163	-0.0352604	0.0387759	8.90963e-07	-0.189816	0.0386255	0.000218748		0.00832088	0.00210587	7.77332e-05	0.00358008	0.00180905	0.0478185	ARL17B, NSFP1	ARL17A
2	q11.2	rs810057	96515073:97515073	AED	6.20651e-05	0.00667364	0.00166636	0.65649	-0.000635971	0.0014299	0.000871698		0.000639218	-0.105348	0.0308544	0.708717	-0.010695	0.0286271	0.00126771		0.00634785	0.00166394	0.000136205	-0.000661005	0.00142812	0.643472	NCAPH	AC008268.1, GPAT2, ANKRD36C, ZNF514, NEURL3, LMAN2L, ASTL, KANSL3, LINC00342, SNRNP200, ITPRIPL1, DUSP2, ANKRD36B, FAHD2CP, CIAO1, TMEM127, CNNM4, ARID5A
2	q24.2	rs61692975	162173036:163173036	CED	6.26089e-05	-0.0106081	0.00265013	1.59084e-07	-0.0119938	0.00228806	0.0307986		0.022855	-0.555577	0.244119	0.74738	0.0599562	0.186134	0.0220978		-0.0106723	0.00264997	5.6414e-05	-0.0119829	0.00228789	1.6272e-07	SLC4A10	PSMD14, AC009299.3
8	p21.2	rs62501777	25430846:26430846	CED	6.75077e-05	-0.00716201	0.00179724	3.0305e-12	-0.0107928	0.00154696	0.0657814		0.306747	-0.0358946	0.0351211	0.0174675	-0.0792207	0.0333321	0.0531301		-0.00723705	0.00179489	5.52975e-05	-0.0109399	0.0015453	1.44713e-12	EBF2, RNA5SP258	EBF2
5	q23.3	rs17677603	127357493:128357493	CED	6.90547e-05	0.00637568	0.00160208	1.27454e-07	0.00726465	0.00137519	0.020216		0.521304	-0.0290458	0.0452899	0.00525174	-0.124849	0.0447303	0.00262956		0.00633141	0.00160108	7.67055e-05	0.00713989	0.00137454	2.05397e-07	FBN2	FBN2
11	q22.3	rs4754196	106596777:107596777	CED	7.48193e-05	0.00616816	0.00155741	5.71897e-09	0.00779465	0.00133813	0.0548587		0.619329	-0.0151167	0.0304295	0.0160875	0.0686955	0.0285434	0.0222766		0.00611255	0.00155537	8.49618e-05	0.0079282	0.00133666	3.00463e-09	RP11-382M14.1, RP11-819C21.1	ALKBH8, AP003057.1, CWF19L2, AP000766.1
14	q24.2	rs227426	69956664:70956664	CED	7.48386e-05	0.00624883	0.00157781	0.0477076	0.00267158	0.0013493	0.0836266		0.0285822	-0.0776081	0.0354503	0.982219	0.000729734	0.0327777	0.0061776		0.00608304	0.00157625	0.000113764	0.00266829	0.00134816	0.0477918	SMOC1	SMOC1
15	q24.1	rs351186	74096129:75096129	CED	8.00917e-05	0.00677163	0.00171685	3.31531e-08	0.00814791	0.00147496	0.00477811		0.363805	0.0334928	0.0368832	0.0371888	0.0721067	0.0346074	0.0655558		0.0068294	0.00171499	6.82874e-05	0.00826388	0.00147362	2.04836e-08	RP11-60L3.2	SCAMP2, CSK, ULK3, MPI, CCDC33, AC023300.1
10	q26.3	rs56092448	133922824:134922824	CED	8.03377e-05	0.00793907	0.00201321	3.90126e-06	0.00794303	0.0017205	0.0706247		0.0940806	-0.13327	0.0795982	0.645594	-0.032829	0.0713867	0.173763		0.0078488	0.00201257	9.62345e-05	0.00791936	0.00172	4.13899e-06	INPP5A	INPP5A
13	q34	rs9550246	114010489:115010489	AED	8.97755e-05	0.0062806	0.00160351	0.8425	0.000273227	0.00137509	0.00445652		0.0143314	0.0817643	0.0333926	0.961269	0.00155878	0.0320343	0.00266906		0.00645426	0.00160166	5.58434e-05	0.000275591	0.00137382	0.84101	TMEM255B	TMCO3, TMEM255B
5	q23.2	rs1428396	122131418:123131418	CED	9.20567e-05	-0.00698028	0.00178491	0.141976	-0.00224472	0.0015286	0.00957808		0.228157	0.0481042	0.0399135	0.0239417	0.0860125	0.0380968	0.0136045		-0.00687034	0.00178313	0.000116693	-0.00210286	0.00152737	0.168579	CTD-2347I17.1, CEP120	KRT8P33
6	q27	rs4709981	165679399:166679399	AED	9.6897e-05	-0.0062788	0.00161064	7.75236e-05	-0.00547708	0.0013859	0.0603163		0.0511094	0.0613397	0.031449	0.748355	0.00957402	0.0298501	0.0705101		-0.00610191	0.00160853	0.000148561	-0.00544471	0.00138441	8.39361e-05	RP11-252P19.1	PDE10A
10	q23.33	rs4110517	96150328:97150328	CED	9.89323e-05	0.00751198	0.00192947	4.36768e-09	0.00970183	0.00165281	0.0509878		0.71426	-0.0293619	0.0801927	0.00613071	-0.223107	0.0814051	0.000247093		0.00749065	0.00192891	0.000103026	0.0096059	0.00165247	6.13424e-09	RP11-400G3.3, CYP2C9	TBC1D12, HELLS, PDLIM1
7	q36.1	rs73728279	150911494:151911494	CED	0.000100159	0.00673212	0.00173049	1.03074e-08	0.00851825	0.00148769	0.0897343		0.102587	0.0527537	0.0323165	0.510879	0.0202143	0.0307403	0.0527633		0.00686371	0.00172801	7.1266e-05	0.00854558	0.00148595	8.8761e-09	PRKAG2	PRKAG2
7	p21.1	rs57301765	18552733:19552733	CED	0.000103981	0.00832207	0.0021442	0.00167172	0.0057868	0.00184109	0.0181031		0.300429	-0.0423482	0.0408959	0.0917719	-0.0651232	0.0386218	0.123581		0.00818316	0.00214126	0.000132557	0.00562603	0.001839	0.00221866	HDAC9, TWIST1
2	p22.1	rs13032770	40071341:41071341	AED	0.00010606	0.00606253	0.00156397	0.081459	0.00233375	0.00133947	0.00773102		0.936318	0.00232729	0.0290907	0.00402645	-0.0790659	0.0274911	0.00550023		0.00605176	0.00156171	0.000106591	0.00214096	0.00133788	0.10954	SLC8A1	SLC8A1
6	q22.31	rs283048	118136902:119136902	CED	0.00011841	0.0112382	0.0029194	5.63827e-07	0.0126396	0.0025262	0.210851		0.0140049	0.126597	0.0515236	0.193797	-0.0674548	0.0519093	0.00101056		0.0116074	0.00291472	6.82449e-05	0.0124504	0.00252321	8.04284e-07	SLC35F1	PLN, CEP85L
5	q22.3	rs2921626	113933063:114933063	CED	0.000133757	0.00598206	0.00156618	1.46445e-09	0.00810422	0.00133987	0.0104739		0.0118232	0.185932	0.0738621	0.943981	-0.0052015	0.0740201	0.00319568		0.00606293	0.00156583	0.000107933	0.00809986	0.00133965	1.48256e-09	RP11-438C19.1, TRIM36	ROBO1
1	q25.3	rs861585	184237925:185237925	CED	0.000143303	0.00601336	0.00158143	0.0245541	0.00304689	0.00135516	0.143573		0.0301415	0.0630969	0.0290976	0.24526	0.0321574	0.0276696	0.068276		0.00618148	0.0015791	9.05695e-05	0.00311655	0.00135354	0.0213058	EDEM3, FAM129A	FAM129A, EDEM3
10	q25.1	rs191784289	106394942:107394942	CED	0.000144005	0.0271329	0.00713785	2.1112e-11	0.0402336	0.00600635	0.0779839		0.0732156	0.218364	0.121891	0.795327	0.0324962	0.125269	0.143798		0.0277864	0.00712564	9.63928e-05	0.0402159	0.00599946	2.03837e-11	SORCS3
9	p13.3	rs76452347	35406471:36406471	CED	0.000149031	-0.00700805	0.00184774	1.82709e-05	-0.00683343	0.00159468	0.162527		0.0277213	-0.148741	0.0675729	0.980063	0.00150886	0.0604709	0.00314353		-0.00711395	0.00184705	0.000117387	-0.00682763	0.00159413	1.84394e-05	HRCT1	HRCT1, GBA2, FAM221B, TPM2
11	q14.1	rs4944176	77052987:78052987	CED	0.000178468	0.00601927	0.00160609	0.00307545	0.00408069	0.00137855	0.0345074		0.00458961	0.111765	0.0394271	0.569319	-0.0222088	0.0390256	0.00786716		0.00619445	0.00160476	0.000113363	0.00404793	0.00137769	0.00330127	RP11-91P24.7	RSF1, AAMDC, AQP11, INTS4, AP002812.3, AP002812.2, CLNS1A
5	q15	rs4869313	95723880:96723880	AED	0.000186516	0.00651355	0.00174313	0.0421813	0.00304265	0.00149756	0.0106802		0.0220382	-0.0702991	0.0307022	0.445988	-0.021899	0.0287352	0.0367646		0.00626674	0.00174033	0.000317118	0.00297509	0.00149553	0.0466658	ERAP2	CAST, ERAP1, ERAP2, LNPEP
12	p12.2	rs17374842	19837687:20837687	CED	0.0001877	-0.00614592	0.00164545	1.25427e-06	-0.0068647	0.00141627	0.0273249		0.356435	-0.0307025	0.0332909	0.000880491	0.100876	0.0303261	0.00173983		-0.00620576	0.00164344	0.00015932	-0.00663023	0.00141473	2.77817e-06	CTC-465D4.1, RP11-284H19.1
2	q24.3	rs268263	164454174:165454174	CED	0.000189596	0.00679099	0.00181938	6.27891e-10	0.00967808	0.00156513	0.029301		0.00423438	-0.173554	0.0606801	0.0251688	-0.1245	0.0556102	0.0327549		0.00662901	0.00181856	0.000267194	0.00957188	0.00156451	9.46799e-10	AC092684.1
20	p12.2	rs6074216	10453438:11453438	AED	0.000192282	-0.00728654	0.00195401	1.57247e-08	-0.00952421	0.0016846	0.0418736		0.835307	-0.00735196	0.0353641	0.0131581	-0.0834294	0.0336484	0.0373155		-0.00728674	0.00195103	0.000187858	-0.00970899	0.00168249	7.89908e-09	RP11-103J8.1
15	q26.3	rs8025126	101289567:102289567	AED	0.00019237	0.00628954	0.00168669	0.00812582	0.00382401	0.00144475	0.157904		0.172744	0.0533417	0.0391174	0.031494	-0.0824255	0.0383237	0.00317957		0.00637686	0.00168512	0.0001542	0.00370161	0.00144372	0.0103495	CHSY1	CHSY1
8	p23.1	rs17708276	9699548:10699548	CED	0.000199839	-0.00844563	0.00227076	3.76065e-08	-0.0107349	0.0019511	0.0230192		0.459487	0.0215756	0.02916	0.00745728	-0.0741849	0.0277252	0.00865801		-0.00826468	0.00226391	0.000261602	-0.0110476	0.00194629	1.37693e-08	MSRA	FDFT1, MSRA, AF131215.2
17	p13.1	rs74439044	7281019:8281019	SSE	0.000205716	0.00973005	0.00262126	2.64255e-11	0.01511	0.00226685	0.00022311		0.00631748	0.290077	0.106223	0.552108	0.0622045	0.104618	0.0337792		0.00990066	0.00262046	0.000157958	0.0151321	0.00226632	2.4396e-11	LSMD1	CYB5D1, TMEM88, TNFSF12, KDM6B, ALOX15B, NAA38
16	q23.2	rs200554033	80992667:81992667	CED	0.00021273	-0.0062214	0.00167988	7.65164e-10	-0.00887565	0.00144266	0.0121003		0.233681	0.0361873	0.0303926	0.0308	-0.06345	0.0293801	0.00920999		-0.00609223	0.00167732	0.000281098	-0.00900692	0.00144092	4.0837e-10	CMIP
13	q12.11	rs9509847	21818314:22818314	CED	0.000220674	0.00616973	0.00167013	8.10108e-13	0.0102695	0.0014343	0.0144562		0.135115	0.0439212	0.0294006	0.0312204	-0.0605423	0.0281038	0.00510805		0.00629116	0.00166744	0.000161335	0.0100855	0.00143244	1.91095e-12	FGF9, RN7SL766P
6	p21.32	rs1053924	31620715:32620715	CED	0.000227381	0.00797451	0.00216313	7.72915e-08	0.0100154	0.00186383	0.00942639		0.0107428	0.154436	0.0605394	0.394864	0.0501702	0.0589714	0.0249888		0.00816126	0.00216175	0.000159814	0.0100555	0.0018629	6.7481e-08	PRRT1	ATF6B, LST1, HLA-DQA1, RNF5, CCHCR1, AGER, ATP6V1G2, HLA-DRB5, HLA-DQB1-AS1, HLA-C, AGPAT1, C4A, SLC44A4, TNXB, LIMS1, HLA-DQB1, DDAH2, HLA-DRB1, C4B, HLA-DQB2, PSMB9, TOM1, PPT2, PRRC2A, HLA-DQA2, CYP21A2, NOTCH4, HLA-B, EGFL8, HLA-DRB6, DHX30
15	q15.1	rs11856572	40844078:41844078	CED	0.000232695	0.0057939	0.00157414	7.45069e-09	0.00782395	0.00135346	0.00852346		0.144641	-0.0422418	0.0289577	0.00398531	-0.0791341	0.0274835	0.0117882		0.00565237	0.00157182	0.000323061	0.00761357	0.00135182	1.78048e-08	INO80	SMAD6, NUSAP1, CHP1, RTF1, NDUFAF1, INO80, OIP5, OIP5-AS1, KNSTRN
10	q23.33	rs7101207	95622857:96622857	CED	0.000259631	-0.0090631	0.00248124	1.60077e-06	-0.0102373	0.00213348	0.0607964		0.00265974	0.430892	0.143412	0.237562	-0.200191	0.169494	0.00156623		-0.00893144	0.00248087	0.000318062	-0.0102674	0.00213331	1.48763e-06	NOC3L, TBC1D12	NOC3L, PDLIM1, PLCE1, TBC1D12, HELLS
10	p12.33	rs1888693	17940444:18940444	CED	0.000286646	0.00595899	0.00164288	4.35749e-10	0.00878318	0.00140734	0.0585707		0.0653591	0.0842584	0.045725	0.516092	-0.0296163	0.045605	0.0389243		0.00605994	0.00164182	0.000223385	0.00874665	0.00140667	5.03598e-10	CACNB2	CACNB2
5	p13.3	rs3860752	32614977:33614977	CED	0.000288572	-0.00571967	0.00157765	0.23463	-0.00161361	0.00135766	0.0263175		0.120825	0.0463586	0.0298872	0.328602	0.0275665	0.0282258	0.0475437		-0.00557496	0.00157546	0.000402207	-0.00154625	0.00135609	0.254191	CTD-2066L21.3
2	p16.1	rs736345	55346146:56346146	CED	0.000325535	-0.00564649	0.00157102	0.455297	-0.00100526	0.00134643	0.00543113		0.308275	-0.030117	0.02956	0.00591863	-0.0771683	0.028038	0.0367646		-0.00571541	0.00156881	0.000269309	-0.00118049	0.00134488	0.380069	SMEK2, PNPT1	PPP4R3B, CFAP36, AC015982.1, PNPT1
8	p23.1	rs10090444	10245469:11245469	CED	0.000345756	-0.00561228	0.00156836	1.91166e-11	-0.00903758	0.00134628	0.000831808		0.00018222	0.149196	0.0398637	0.456969	0.0288401	0.0387795	0.00527494		-0.00537303	0.00156715	0.000606839	-0.00899198	0.00134547	2.33848e-11	RP11-177H2.2, XKR6	TDH, FAM86B3P, NEIL2, FDFT1, XKR6, AC087203.2, AF131215.5, RP11-148O21.3, CTSB, AC022239.1, CLDN23, PINX1, AF131215.2, PRAG1, BLK, SLC35G5, SOX7, RP1L1, AF131215.6, FAM66A, FAM86B1, FAM167A, MSRA
19	p13.3	rs8101970	1335625:2335625	CED	0.00034636	-0.00691361	0.00193227	2.6839e-08	-0.00920501	0.00165524	0.0674908		0.00675206	0.088551	0.0326879	0.00201619	0.0949101	0.0307383	0.0352193		-0.00658119	0.0019289	0.00064516	-0.00890397	0.00165285	7.16203e-08	REXO1	REXO1, KLF16, SCAMP4, ATP8B3
8	q11.21	rs2219210	51409244:52409244	CED	0.000356668	0.00734882	0.00205832	3.47359e-05	0.00729468	0.00176197	0.0305705		0.00622437	0.2021	0.0738773	0.140983	-0.117108	0.0795502	0.00163959		0.00749988	0.00205752	0.000267284	0.00723368	0.00176154	4.01774e-05	RP11-139G7.1, SNORA7
1	q42.13	rs849903	227637659:228637659	CED	0.000370649	0.0055626	0.00156243	4.62172e-09	0.0078667	0.00134232	0.0168382		0.173556	0.0430786	0.0316572	0.000692401	0.100479	0.0296156	0.059851		0.00565376	0.00156053	0.000291234	0.00805657	0.00134094	1.87672e-09	WNT9A, CICP26	OBSCN, RNF187, WNT9A, WNT3A, IBA57, MRPL55, OBSCN-AS1
2	q11.1	rs1813381	95922939:96922939	CED	0.000377113	0.00678451	0.00190808	0.0682318	0.00299515	0.00164254	0.0724794		4.41312e-05	0.249022	0.0609649	0.463942	0.0460244	0.0628516	0.00123815		0.00702156	0.00190715	0.000231672	0.00302452	0.00164198	0.0654759	AC008268.1, AC008268.2	TMEM127, ZNF514, NEURL3, ITPRIPL1, DUSP2, LMAN2L, ANKRD36B, AC008268.1, GPAT2, FAHD2CP, ASTL, ANKRD36C, CIAO1, ARID5A, LINC00342
1	p34.2	rs71654213	41889815:42889815	CED	0.000377418	-0.00557391	0.0015677	2.53352e-06	-0.00632801	0.0013448	0.111271		0.673828	-0.0121465	0.0288555	0.00702894	-0.0740169	0.0274599	0.00791198		-0.00559325	0.00156539	0.000352821	-0.00648997	0.00134319	1.35335e-06	HIVEP3	SVBP, HIVEP3
8	p23.1	rs7837979	9698534:10698534	CED	0.000382413	0.00563048	0.00158515	5.15626e-14	0.0102067	0.00135575	0.00448957		0.000393109	0.128173	0.0361569	0.527391	0.0222213	0.0351576	0.00509349		0.00586556	0.00158363	0.000212334	0.0102245	0.00135474	4.44659e-14	MSRA	RP1L1, FAM86B3P, NEIL2, FDFT1, FAM66A, XKR6, CLDN23, AF131215.2, FAM167A, BLK, MSRA, SLC35G5
2	p22.2	rs13419498	37059743:38059743	CED	0.000448327	-0.00561953	0.00160103	3.66652e-08	-0.00757106	0.00137495	0.045006		0.00237047	-0.190512	0.0626807	0.855972	0.0100394	0.0553033	0.00788679		-0.00574008	0.00160051	0.00033526	-0.00756018	0.00137453	3.79333e-08	RNU6-939P, QPCT	EIF2AK2, NDUFAF7, PRKD3, QPCT, CEBPZ
4	q24	rs56388530	106410958:107410958	CED	0.000458587	0.00639465	0.001825	3.56364e-12	0.0108839	0.00156515	0.0232174	AED	0.831286	0.00711463	0.0333924	0.000958444	-0.107006	0.0324021	0.00193173		0.00639679	0.00182228	0.000447562	0.0106095	0.00156333	1.14912e-11	NPNT	TBCK
5	q23.2	rs1579036	122421103:123421103	AED	0.000468034	-0.00693983	0.00198367	0.0450195	-0.00340823	0.0017003	0.00774129		0.570493	0.0168276	0.0296595	0.0451304	0.0559265	0.0279098	0.0406908		-0.00683399	0.00197925	0.000554758	-0.00318883	0.00169715	0.0602543	CSNK1G3	CSNK1G3
10	q23.33	rs1934967	96241426:97241426	CED	0.000507773	0.00644443	0.00185361	0.000678873	0.0054154	0.00159369	0.0801988		0.0077825	-0.208005	0.0781574	0.512407	0.0440456	0.0672275	0.0072448		0.00632388	0.00185309	0.00064343	0.0054371	0.00159324	0.000643466	CYP2C9	CYP2C8, TBC1D12, HELLS, NOC3L
11	q13.1	rs112437639	65031612:66031612	AED	0.000553845	-0.0213498	0.00618239	1.64987e-08	-0.0296328	0.00524897	0.221788		0.0662765	-0.942152	0.513003	0.369191	-0.311086	0.346426	0.0994267		-0.0214835	0.00618194	0.000510463	-0.0296974	0.00524837	1.52784e-08	RP11-770G2.2	RNASEH2C, OVOL1, RIN1, CTSW, SIPA1, SPDYC
5	q23.2	rs335210	122001864:123001864	CED	0.000587846	0.00748484	0.00217758	2.85071e-08	0.0103502	0.0018647	0.0158192		0.0134961	0.102105	0.0413355	0.304902	0.0407292	0.0396993	0.0252831		0.00774671	0.00217456	0.000367455	0.0104171	0.00186265	2.23667e-08	PRDM6	PRDM6
16	q23.1	rs11641308	74812023:75812023	CED	0.000687881	0.0107484	0.00316648	0.00016941	0.0102597	0.00272806	0.055233		0.00421629	-0.116893	0.0408506	0.162507	-0.0525372	0.0376137	0.0114021		0.00998606	0.00315701	0.00156078	0.00993109	0.00272091	0.00026233	BCAR1, RNU6-758P	TMEM170A, AC009054.2, BCAR1, CFDP1, CHST6
12	q24.13	rs11066196	112155122:113155122	CED	0.000775875	-0.00949031	0.00282339	3.76438e-07	-0.0122891	0.00241879	0.169579		0.0312878	-0.135207	0.0627883	0.928622	-0.00499646	0.0557723	0.0265937		-0.009744	0.00282054	0.000550993	-0.0122754	0.00241652	3.7785e-07	HECTD4	ERP29, HECTD4, MAPKAPK5-AS1, TMEM116, PHETA1, NAA25, MAPKAPK5, SH2B3, ACAD10
19	q12	rs17513752	29790811:30790811	CED	0.000925813	0.00549493	0.00165899	0.000282285	0.00516335	0.00142198	0.103491		0.0318883	0.0694328	0.0323614	0.969795	0.00116932	0.0309013	0.0399444		0.00566252	0.00165681	0.00063149	0.00515491	0.00142048	0.000284521	C19orf12, CCNE1	CCNE1, C19orf12
10	q21.3	rs11527181	64046164:65046164	SSE	0.000927582	-0.00527267	0.00159215	1.38995e-11	-0.00925063	0.00136857	0.000255763		0.509596	-0.01914	0.0290253	0.0019987	0.084001	0.027184	0.00332275		-0.00531427	0.00158976	0.000829337	-0.00901487	0.00136684	4.24061e-11	ALDH7A1P4, RP11-436D10.3	EGR2, ADO
16	p13.3	rs10500326	4418326:5418326	CED	0.000998155	-0.00605038	0.0018384	5.65399e-09	-0.00918263	0.00157589	0.0671544		0.446003	-0.0314339	0.0412472	0.000817172	-0.134541	0.0401984	0.0191566		-0.0061007	0.00183658	0.00089445	-0.00937499	0.00157468	2.62333e-09	UBN1	GLYR1, UBN1, PPL, ROGDI
4	q21.21	rs113087495	80682951:81682951	SSE	0.00102699	0.0147541	0.00449396	1.15286e-08	0.0221514	0.00388158	0.0311177		0.39033	0.129536	0.150793	0.0217031	0.288654	0.125747	0.0395213		0.014856	0.00449197	0.000942241	0.0224051	0.00387973	7.69951e-09	PRDM8, FGF5	PRDM8
8	p23.1	rs7006985	9064437:10064437	CED	0.00105297	-0.00525908	0.00160532	1.48845e-13	-0.0101843	0.00137837	0.00773502		0.00359637	0.105062	0.0360829	0.643666	0.0160702	0.0347484	0.0214998		-0.00504115	0.00160373	0.00167008	-0.0101431	0.00137729	1.77788e-13	TNKS	TDH, TNKS, FAM86B3P, FDFT1, FAM66A, CLDN23, MFHAS1, FAM167A, BLK, MSRA
16	q24.3	rs2460448	89200881:90200881	CED	0.00107452	-0.00516088	0.0015781	4.13171e-13	-0.00979416	0.00135061	0.00234518		0.281975	-0.0335309	0.0311678	0.00111817	-0.0967246	0.0296796	0.0243616		-0.00523342	0.00157608	0.000898467	-0.00997381	0.00134921	1.443e-13	DPEP1	SPATA2L, LINC02166, DPEP1, VPS9D1, DEF8, FAM157C, VSIG10, ZNF276, SPATA33, CPNE7, ZNF395, SPIRE2, TCF25, DBNDD1, CDX2, SH3PXD2A, CDK10, RPL13, SPG7, CDS1, CHMP1A, MC1R, FANCA, ANKRD11
6	p21.32	rs1617322	32173893:33173893	AED	0.00107876	0.00535706	0.00163865	1.90507e-06	0.00672276	0.00141134	0.0162805		0.00202144	0.0921871	0.0298595	0.431536	-0.0224665	0.0285611	0.00118504		0.00561778	0.00163619	0.00059594	0.00665166	0.00140962	2.37286e-06	HLA-DQB1, MTCO3P1	ATF6B, HLA-DQA1, HLA-H, HLA-G, RNF5, HLA-DRB5, TUBB, BTN3A2, HLA-DQB1-AS1, HLA-C, HLA-DMA, C4A, TNXA, IER3, CYP21A1P, HLA-DRB6, TNXB, HLA-DQB1, HLA-DRA, HLA-DPB2, C4B, HLA-DRB1, HLA-DQB2, PSMB9, CYP21A2, PBX2, NOTCH4, VARS2, SKIV2L, HLA-DPB1, TAP2, FLOT1
2	p21	rs76099932	42666683:43666683	CED	0.00109873	-0.00896652	0.0027471	1.6664e-07	-0.0123657	0.00236287	0.0725623		0.360555	0.0652352	0.0713537	0.02728	-0.163881	0.0742389	0.0121051		-0.0088567	0.00274507	0.00125355	-0.012519	0.00236167	1.15224e-07	AC098824.6, AC016735.1
12	q24.12	rs4098854	111536797:112536797	CED	0.00110462	-0.00862172	0.00264269	1.27596e-06	-0.0109542	0.00226158	0.0906069		0.0454069	-0.108648	0.0543009	0.507642	0.0321477	0.0485132	0.0191566		-0.00885808	0.00263957	0.000791119	-0.0108607	0.00225913	1.52835e-06	ATXN2	TMEM116, MAPKAPK5-AS1, PHETA1, NAA25, MAPKAPK5, SH2B3, ACAD10
1	p36.22	rs11801879	11428819:12428819	AED	0.00110768	-0.00900979	0.0027623	4.3524e-08	-0.0129884	0.00237182	0.0163318		0.982531	-0.00145005	0.0662075	0.00193948	-0.21032	0.0678598	0.00421777		-0.00899665	0.0027599	0.001115	-0.0132292	0.00237037	2.39069e-08	NPPB, RP5-934G17.6	NPPA, MTHFR, MFN2, PLOD1, NPPB, KIAA2013
5	p13.3	rs2859814	32172781:33172781	CED	0.00119024	-0.00615313	0.00189837	1.13862e-07	-0.00866911	0.00163467	0.0477381		0.0223028	-0.11013	0.0481931	0.573123	-0.0250081	0.0443821	0.00262956		-0.00631421	0.0018969	0.000872511	-0.00869125	0.00163356	1.03525e-07	CTD-2004A9.1, NPR3
12	q24.12	rs6490037	111213671:112213671	CED	0.00120643	-0.00737424	0.00227782	1.13791e-10	-0.0125639	0.00194857	0.0285899		0.0103718	-0.0904577	0.0352914	0.225995	-0.0397434	0.0328264	0.00577807		-0.00771892	0.00227309	0.000684332	-0.0126593	0.00194515	7.60739e-11	CUX2	TMEM116, MAPKAPK5-AS1, PHETA1, ADAM1A, NAA25, MAPKAPK5, SH2B3
6	p21.33	rs3099840	30930721:31930721	AED	0.0014237	-0.00531305	0.00166561	0.0774534	0.00252372	0.00142933	0.000203362		0.057279	0.124745	0.0656143	0.956887	0.00350385	0.0647738	0.0204416		-0.0052293	0.00166507	0.00168614	0.0025242	0.00142898	0.0773237	XXbac-BPG181B23.6	ATF6B, LINC00243, HLA-DQA1, HLA-H, HLA-G, RNF5, CCHCR1, HLA-S, TUBB, BTN3A2, GPANK1, POU5F1, HLA-C, HCP5, HCG22, C4A, TNXA, IER3, CYP21A1P, PSORS1C3, MICB, HLA-DQB1, BAG6, C4B, HLA-DRB1, PSMB9, HLA-DQA2, CYP21A2, VARS2, SKIV2L, HLA-DPB1, APOM, FLOT1, AGER, B2M
7	q22.1	rs13245899	99997131:100997131	AED	0.00164109	0.00491146	0.00155991	0.602463	0.000696448	0.0013371	0.00127167		0.442836	0.022632	0.0294974	0.0285328	-0.0612862	0.0279861	0.00921767		0.00496088	0.00155773	0.00144915	0.000555284	0.00133558	0.677583	ACHE, RN7SL549P	MUC12, SLC12A9, PILRB, TRIP6, SRRT, ACHE, EPHB4, ZAN, GIGYF1, UFSP1
20	q13.33	rs8118848	61961572:62961572	SSE	0.0016789	-0.00577969	0.00183956	1.11872e-13	-0.0116701	0.00157139	0.00196203		0.035406	0.0974261	0.0463121	0.186235	-0.0604509	0.045736	0.00764254		-0.00561711	0.00183811	0.00224373	-0.0117276	0.00157046	8.16612e-14	ZBTB46	OPRL1, TPD52L2, UCKL1, ZBTB46
10	q24.33	rs7067666	104832452:105832452	AED	0.00170817	0.00532717	0.00169827	0.440909	-0.00111801	0.00145071	0.00318614		0.511688	-0.035045	0.053406	0.0130558	0.118227	0.0476303	0.00434308		0.00528639	0.00169741	0.00184331	-0.0010074	0.00145004	0.487218	NEURL1	BORCS7, NT5C2, SH3PXD2A
6	p22.3	rs2504808	21924253:22924253	CED	0.00175848	-0.00610287	0.00195085	1.49959e-08	-0.00946674	0.00167202	0.0680992		0.674781	-0.0397091	0.0946385	0.0159689	0.198564	0.0824099	0.0287997		-0.00611714	0.00195044	0.00171096	-0.00938114	0.00167168	2.00213e-08	RP3-404K8.2, HDGFL1
2	q24.3	rs6727986	164480159:165480159	AED	0.0018509	-0.00506652	0.00162742	0.0129077	-0.00348037	0.0013998	0.324204		0.0406967	-0.069259	0.0338408	0.0050458	-0.0904095	0.0322422	0.177358		-0.00521463	0.00162554	0.00133691	-0.00364391	0.00139848	0.00917086	AC092684.1
12	q24.31	rs7953894	122904966:123904966	CED	0.00199583	0.00484323	0.00156693	0.0193907	0.00313818	0.00134228	0.0524563		0.543376	-0.025723	0.042329	0.0161812	0.0938273	0.039013	0.018911		0.0048014	0.00156586	0.0021672	0.00324541	0.00134149	0.015552	VPS37B, ABCB9	ABCB9, PITPNM2, ARL6IP4, RILPL2, KMT5A, MPHOSPH9, VPS37B, CDK2AP1, DDX55
17	p13.3	rs6503187	1449098:2449098	AED	0.0020194	-0.00487763	0.00157984	0.0148095	-0.00330616	0.00135664	0.033616		0.00496382	-0.0811428	0.0288829	0.910065	0.00307527	0.0272163	0.00452713		-0.00510513	0.00157748	0.00121111	-0.00329034	0.00135496	0.0151667	RP11-667K14.3, MIR132	HIC1, DPH1, SRR, SGSM2
8	q21.13	rs143348642	80886171:81886171	CED	0.00201968	-0.00602566	0.00195171	7.85143e-06	-0.00748897	0.00167564	0.0504351		0.0245143	-0.0844931	0.0375698	0.406248	-0.0292692	0.0352437	0.0422635		-0.00623685	0.00194908	0.0013748	-0.00753809	0.00167375	6.67753e-06	RNU6-1213P, Y_RNA
7	p14.2	rs343003	34979439:35979439	CED	0.00205189	-0.00534751	0.0017347	0.171334	-0.00203695	0.00148907	0.00650884		0.962693	-0.00177658	0.0379906	0.0167006	0.0845066	0.0353118	0.00264743		-0.00534008	0.00173289	0.00205894	-0.00188333	0.00148775	0.205552	AC009531.2, AC007652.1	DPY19L1
13	q12.3	rs7338758	29637828:30637828	CED	0.00209401	-0.00565348	0.00183757	2.82258e-10	-0.0099262	0.00157345	0.020494		0.00871906	0.110817	0.0422496	0.889576	0.00572359	0.0412361	0.0067653		-0.00543357	0.00183583	0.00307909	-0.00990345	0.00157231	3.00195e-10	SLC7A1
7	q21.2	rs60814640	91786918:92786918	CED	0.00209695	0.00601744	0.00195613	2.04947e-05	0.00714702	0.00167789	0.0909031		9.26889e-05	-0.148978	0.0381117	0.421776	-0.0280693	0.0349403	0.00270296		0.00561019	0.00195356	0.00408164	0.007066	0.00167596	2.48573e-05	CDK6	CDK6, GATAD1
3	q25.32	rs699920	157447175:158447175	CED	0.00210279	0.00551349	0.00179279	2.82587e-06	0.00723271	0.00154439	0.0290464		0.333622	0.0322736	0.033376	0.0633113	-0.0599995	0.0323088	0.0234942		0.00559048	0.00179021	0.00179135	0.00707944	0.00154263	4.44936e-06	RSRC1
10	q25.1	rs143109501	107243927:108243927	AED	0.00212387	0.0241191	0.00785026	4.33469e-11	0.0443491	0.00672717	0.0503718		0.0144745	-0.530168	0.216814	0.699136	-0.0635417	0.16441	0.043182		0.0233934	0.00784512	0.00286461	0.0441688	0.00672155	4.99039e-11	RP11-56I23.1, RP11-298H24.1
10	q11.21	rs61852531	44839894:45839894	AED	0.00219326	-0.00611649	0.00199704	0.316513	-0.00172243	0.00171959	0.0242335		0.00421077	-0.0951726	0.0332549	0.968617	-0.00122275	0.0310798	0.00393616		-0.0064365	0.00199345	0.00124299	-0.00172091	0.00171696	0.316201	TMEM72-AS1
19	p13.11	rs12977269	16715648:17715648	AED	0.00234142	-0.0058407	0.00191929	1.22428e-09	-0.0100176	0.00164836	0.0485068		0.0154591	-0.0730127	0.0301528	0.36534	0.0254436	0.02811	0.00846183		-0.00611175	0.00191541	0.00141866	-0.00989608	0.00164553	1.81107e-09	MYO9B	HAUS8, MYO9B
4	p14	rs6812640	37887900:38887900	CED	0.00240087	-0.00482895	0.00159077	6.56802e-09	-0.00788924	0.00135978	0.0394056		0.00187397	0.091366	0.0293824	0.896584	0.00362343	0.0278568	0.00276589		-0.00454781	0.00158844	0.00419571	-0.00786187	0.00135816	7.09718e-09	RP11-83C7.1, RP11-83C7.2
5	q33.3	rs2419923	157482779:158482779	CED	0.00251504	0.00515012	0.00170445	8.55436e-13	0.0104618	0.00146269	0.00388274		0.964658	0.00186825	0.0421351	0.00129448	0.123739	0.0384614	0.016185		0.00514476	0.00170306	0.00252028	0.0106254	0.00146163	3.60728e-13	RP11-32D16.1, EBF1
16	q22.1	rs77870048	69465021:70465021	CED	0.00290136	0.00552903	0.0018566	0.00120125	0.00515053	0.00159034	0.108361		0.0170294	0.278298	0.116637	0.767085	-0.0375254	0.126697	0.0333312		0.00559813	0.00185636	0.00256439	0.00514381	0.00159021	0.00121787	WWP2	CLEC18A, CLEC18B, EXOSC6
5	p13.3	rs12659332	32437490:33437490	CED	0.00292613	0.00513142	0.00172459	1.53925e-10	0.00948449	0.00148154	0.0454876		0.0287862	-0.0701864	0.0321012	0.165566	0.0413051	0.029785	0.00544819		0.00491466	0.00172211	0.00431907	0.00956303	0.00147971	1.02805e-10	CTD-2066L21.3
8	p23.1	rs907183	8229761:9229761	CED	0.00295606	0.00467643	0.00157333	1.62513e-12	0.0095184	0.00134748	0.0022346		0.0011823	0.102259	0.0315297	0.570314	-0.0172438	0.0303814	0.00146732		0.00491881	0.00157137	0.00174654	0.00946586	0.00134616	2.03935e-12	MFHAS1	TDH, FAM86B3P, NEIL2, FDFT1, XKR6, FAM85B, RPL10P19, CLDN23, PRAG1, BLK, FAM66D, MFHAS1, AC103957.2, RP1L1, ALG1L13P, FAM66A, FAM167A, ERI1, MSRA
11	q22.1	rs35165060	99934951:100934951	CED	0.00301854	0.00491646	0.00165767	1.03402e-07	0.00756899	0.00142252	0.0542301		0.00424245	0.0970813	0.0339504	0.745213	0.010564	0.0324954	0.0283069		0.00513566	0.0016557	0.00192342	0.00757472	0.00142116	9.82351e-08	CNTN5, RN7SL222P
16	q21	rs28802661	64765028:65765028	AED	0.0030309	0.00679445	0.00229184	0.931446	-0.000169279	0.00196777	0.0206905		0.946658	-0.00239787	0.0358392	0.056816	0.0636319	0.03341	0.0374487		0.00675701	0.00228717	0.00313365	5.12775e-05	0.00196437	0.979175	RP11-256I9.2
3	q23	rs55788564	140644408:141644408	CED	0.00317952	0.0109433	0.00370976	9.32108e-06	0.0140725	0.00317486	0.391324		0.286239	0.116787	0.109507	0.011659	-0.311199	0.123379	0.00473823		0.0110646	0.00370763	0.00284242	0.0138573	0.00317381	1.26468e-05	ZBTB38	ZBTB38
20	q13.33	rs4809361	61947662:62947662	CED	0.00424177	-0.00553532	0.00193567	2.24913e-10	-0.0105084	0.00165653	0.0483172		0.0959262	0.0569284	0.0341912	0.84014	-0.00651316	0.0322917	0.0714456		-0.00533576	0.00193258	0.0057632	-0.0104979	0.00165435	2.21525e-10	RP4-583P15.11	RIN1
7	q11.23	rs587650617	73739332:74739332	CED	0.00452487	0.00546135	0.00192363	3.14848e-07	0.00841155	0.00164464	0.0449723		0.150189	0.0614619	0.0427152	0.00878962	0.105405	0.0402254	0.00312718		0.00557469	0.00192168	0.00372041	0.00857342	0.00164327	1.81551e-07	GTF2IRD2
13	q13.3	rs7322054	37746708:38746708	CED	0.00452827	-0.00448141	0.0015786	0.00991144	-0.00348987	0.00135322	0.10515		0.0635469	-0.0585172	0.0315424	0.492144	0.0203417	0.0296103	0.0133256		-0.00461642	0.00157663	0.00341114	-0.0034402	0.00135181	0.0109313	TRPC4
16	p12.3	rs9932532	16982912:17982912	CED	0.00455983	0.00476299	0.0016791	0.417452	-0.00116811	0.0014406	0.00734362		0.0709162	0.0650009	0.0359923	0.412146	-0.028202	0.0343902	0.0198535		0.00489381	0.00167728	0.00352611	-0.00121546	0.00143934	0.398412	XYLT1	XYLT1
3	q22.3	rs12107581	137593884:138593884	CED	0.0047971	-0.00463065	0.00164185	2.35484e-08	-0.00785089	0.00140598	0.0685518		0.0173779	0.118174	0.049681	0.361376	-0.0451574	0.0494763	0.00130132		-0.00449667	0.00164095	0.00613869	-0.00788099	0.00140541	2.05151e-08	MRAS	CEP70, FAIM, MRAS
6	p22.1	rs3129817	29842753:30842753	AED	0.00512739	-0.00589501	0.00210614	0.835025	0.00037759	0.00181306	0.00992279		0.00562475	0.348831	0.125981	0.330525	-0.137495	0.141301	0.00218141		-0.0057959	0.00210585	0.00591803	0.000354894	0.00181291	0.844798	UBQLN1P1, MICC	LINC00243, HLA-J, HCG18, HLA-DQA1, TRIM31, HLA-H, ZNRD1ASP, HLA-G, HCG4, PPP1R18, CCHCR1, HLA-A, TUBB, BTN3A2, TRIM10, ZNRD1, POU5F1, HLA-C, ZFP57, GABBR1, C4A, IER3, HLA-K, FBRSL1, TRIM26, HLA-DQB1, TRIM15, HLA-L, TMEM154, HLA-DRB1, VARS2, DDX39BP2, HLA-B, HLA-DPB1, FLOT1
15	q23	rs11853359	71121524:72121524	AED	0.00515156	0.00464518	0.00166051	0.678073	0.000594621	0.00143249	0.0474626		0.21577	-0.0410241	0.0331412	0.000733973	-0.107613	0.0318706	0.00266906		0.00453082	0.00165843	0.00629525	0.000376456	0.00143105	0.792501	THSD4	THSD4
8	p21.2	rs537551388	22899889:23899889	CED	0.00516241	0.00447243	0.00159915	2.54194e-06	0.00646368	0.00137382	0.096869		0.317558	0.0578537	0.0578876	0.00166825	-0.186714	0.0593933	0.0014093		0.00451314	0.00159854	0.00475341	0.00636038	0.00137345	3.64008e-06	SLC25A37
19	p13.2	rs11671314	6758405:7758405	CED	0.0053292	0.00672348	0.00241291	4.36663e-08	0.0113214	0.00206762	0.00421508		0.0169204	0.0936725	0.039221	0.252044	0.04282	0.0373803	0.080557		0.00705132	0.00240836	0.00341307	0.0114175	0.00206446	3.19356e-08	INSR
2	q32.1	rs12693302	182711443:183711443	CED	0.0054171	-0.004365	0.00156949	4.2611e-08	-0.00738958	0.00134849	0.00617844		0.777773	-0.00831044	0.0294493	0.0171117	-0.0672098	0.0281886	0.0391674		-0.00437617	0.00156727	0.00523453	-0.00752617	0.00134695	2.30279e-08	PDE1A
1	p13.2	rs146401699	112629988:113629988	SSE	0.00551492	-0.00916238	0.00330135	8.58384e-09	-0.0163686	0.00284334	0.00337225		0.079483	0.258202	0.147231	0.69661	-0.0617158	0.158288	0.0547144		-0.00902802	0.00330052	0.00623174	-0.0163832	0.00284288	8.26831e-09	ST7L	CAPZA1, RHOC, ST7L
13	q34	rs9555690	110513190:111513190	AED	0.0056965	-0.00597391	0.00216071	0.466457	0.00134912	0.00185254	0.0100833		0.159871	0.0521559	0.0371038	0.0133218	0.086141	0.0348059	0.0563183		-0.00577744	0.00215706	0.00739761	0.00158865	0.00184992	0.39047	COL4A2	COL4A2
19	q13.33	rs73046792	49105705:50105705	AED	0.00581159	-0.00579517	0.00210102	4.18816e-07	-0.00909525	0.00179735	0.0262969		0.240047	0.0446387	0.0379991	0.00432859	-0.107684	0.0377423	0.00204383		-0.00564146	0.00209782	0.00716224	-0.00931833	0.00179532	2.09892e-07	SNRNP70	LIN7B
10	q11.21	rs11239271	44876294:45876294	AED	0.006261	-0.00483318	0.00176792	4.00488e-06	-0.0069985	0.0015177	0.104006		0.0252306	-0.0655823	0.0293058	0.130492	0.0418615	0.0276783	0.00218141		-0.00505346	0.00176471	0.00418831	-0.00685203	0.00151542	6.13943e-06	TMEM72-AS1	RASSF4, TMEM72, ALOX5
4	q32.1	rs922888	155987119:156987119	CED	0.00676822	0.0042152	0.00155653	1.19271e-10	0.00860203	0.00133559	0.016928		0.87841	-0.00561272	0.0366875	0.0362252	0.0713434	0.03406	0.0606259		0.00419754	0.00155513	0.00695156	0.00869836	0.00133456	7.13701e-11	RP13-487K5.1, GUCY1A3
16	p13.3	rs45593734	0:834732	CED	0.00688505	-0.00570357	0.00211057	8.81333e-09	-0.0103851	0.00180537	0.0138883		0.0118923	-0.0752776	0.0299278	0.219605	-0.0346743	0.0282449	0.0128923		-0.00604788	0.00210534	0.00407065	-0.0104839	0.00180169	5.92247e-09	PDIA2	PDIA2, TMEM8A, DECR2, HBZ, AXIN1, FAM234A, HBQ1, NME4, HBM
17	q21.31	rs2301597	42673273:43673273	CED	0.00752507	0.00469095	0.00175513	7.85105e-07	0.00746135	0.00151064	0.0282949		0.311539	0.0367658	0.036332	0.00566919	0.0936543	0.0338502	0.0123159		0.00476563	0.00175309	0.0065594	0.00763267	0.00150914	4.24487e-07	NMT1	LINC02210, HEXIM1, DCAKD, SPATA32, HEXIM2, ACBD4, DND1P1, LRRC37A4P, NMT1
2	p24.3	rs6431689	14904546:15904546	AED	0.00778989	-0.00450211	0.00169184	0.129889	-0.00220409	0.00145528	0.00696308		0.00581319	0.0814694	0.0295376	0.209195	-0.035737	0.0284572	0.00213425		-0.00422098	0.00168907	0.0124545	-0.00229156	0.00145338	0.114863	NBAS	NBAS
11	p15.5	rs217230	1515507:2515507	CED	0.00797495	-0.00418297	0.0015766	5.30856e-09	-0.00790072	0.00135345	0.0330086		0.565192	0.0167981	0.0292152	0.106815	-0.0449911	0.0279005	0.0536538		-0.00412205	0.00157431	0.00883639	-0.0079878	0.00135186	3.44727e-09	AC051649.6, H19	H19, MRPL23, TNNT3, MRPL23-AS1
1	q32.1	rs882624	201235913:202235913	CED	0.00799778	-0.00414913	0.00156441	0.284839	-0.00143573	0.00134242	0.0762403		0.00765731	-0.175319	0.0657412	0.272242	0.0622609	0.0567083	0.00310517		-0.004246	0.00156397	0.00662971	-0.00140006	0.00134204	0.296844	IPO9-AS1	NAV1, RNPEP
2	p21	rs67584485	43262195:44262195	CED	0.00814228	-0.00463287	0.0017508	1.98419e-12	-0.0105677	0.00150194	0.00273193		0.0841548	0.0503128	0.0291315	0.000307613	-0.101611	0.0281566	8.84715e-05		-0.00443512	0.00174765	0.0111562	-0.010826	0.00149981	5.26521e-13	THADA	THADA, PLEKHH2
10	q24.32	rs377697866	104388113:105388113	CED	0.00819417	0.00476948	0.00180389	0.0864173	0.00265327	0.00154744	0.157881		0.512461	-0.0395426	0.0603717	0.0367741	0.111872	0.0535744	0.00314353		0.00472995	0.00180309	0.00870939	0.00274431	0.00154679	0.0760311	NT5C2	CNNM2, NT5C2, BORCS7
20	p12.2	rs2423514	10193337:11193337	CED	0.00881091	-0.00425052	0.00162275	2.76646e-05	-0.00582395	0.0013893	0.0042205		0.00763849	-0.0770582	0.0288861	0.0379648	-0.0565979	0.027273	0.136129		-0.00447957	0.0016202	0.00569517	-0.00595536	0.0013875	1.7695e-05	RP11-103J8.1
20	q13.33	rs4372964	62207527:63207527	AED	0.00949627	-0.0040878	0.00157606	7.19564e-09	-0.00784647	0.00135598	0.0242177		0.0385873	-0.084849	0.0410182	0.23114	0.0453366	0.0378604	0.00921709		-0.00420686	0.0015749	0.00755821	-0.00777834	0.00135511	9.46766e-09	RGS19	TCEA2, LKAAEAR1, RGS19, OPRL1
20	q13.33	rs6011210	62029923:63029923	CED	0.0118476	0.00392747	0.00156057	2.5125e-09	0.00799446	0.00134115	0.0421421		0.903011	-0.006487	0.0532308	0.022636	0.11087	0.0486349	0.00314353		0.00391853	0.0015599	0.0120036	0.00807263	0.00134064	1.72836e-09	DNAJC5	UCKL1, DNAJC5, TPD52L2
17	q21.32	rs79553110	45175925:46175925	AED	0.0119763	0.00963838	0.0038356	0.17138	0.00451359	0.00329991	0.020979		0.0965392	0.128349	0.0772318	0.0117028	0.177786	0.0705223	0.0863285		0.00993046	0.00383088	0.00953605	0.00489215	0.0032963	0.137774	NPEPPS	HOXB2, RPRML, TBKBP1, SCRN2, COPZ2, EFCAB13, TBX21, SKAP1
12	q13.13	rs61932870	51002156:52002156	CED	0.0132751	-0.0113431	0.00458062	2.66317e-08	-0.0218276	0.00392407	0.0504076		0.789311	0.0163949	0.0613573	0.143118	0.0821697	0.0561168	0.118936		-0.0111894	0.00456791	0.0143031	-0.0213216	0.00391451	5.12846e-08	TFCP2	BIN2, DAZAP2, CERS5, METTL7A
5	q33.3	rs62386479	157345025:158345025	AED	0.0134186	0.00727676	0.00294309	1.85812e-08	0.0142056	0.00252547	0.0215284		0.524521	-0.0205283	0.0322577	0.0332334	0.0636319	0.0298868	0.02194		0.00704722	0.00293092	0.0161972	0.014556	0.0025165	7.28452e-09	CTC-436K13.2, RP11-542A14.1
4	p15.33	rs2702565	14578484:15578484	CED	0.0136155	-0.00402516	0.00163142	7.4394e-06	-0.0062711	0.00139954	0.0509456		0.0484152	0.0592119	0.0299972	0.273046	-0.0313111	0.0285689	0.00914948		-0.00383867	0.00162901	0.0184511	-0.00633105	0.00139786	5.92387e-06	RP11-665G4.1	CPEB2, LINC00504, AC098829.1
13	q34	rs11838776	110540681:111540681	AED	0.0149968	-0.00419988	0.00172658	0.00306157	-0.00440114	0.00148611	0.0554834		0.0392122	0.0652258	0.0316318	0.548509	0.0181247	0.0301986	0.112809		-0.00399365	0.00172401	0.0205319	-0.00434672	0.00148431	0.0034067	COL4A2	COL4A2
7	q32.3	rs12154627	129922934:130922934	SSE	0.0160853	-0.00379649	0.00157727	5.94161e-12	-0.00930231	0.00135179	0.00488265		0.019527	0.0737429	0.0315721	0.743221	-0.00983521	0.0300233	0.0254428		-0.00360345	0.00157531	0.0221689	-0.00930339	0.00135042	5.6089e-12	KLF14, RP11-36B6.1	COPG2
13	q12.12	rs61948063	24751848:25751848	CED	0.0166194	0.00568491	0.00237361	0.000319502	0.00732019	0.00203394	0.0632757		0.0157237	-0.18883	0.0781823	0.881677	0.0101879	0.0684477	0.00681864		0.00550579	0.00237252	0.0203056	0.00732272	0.00203304	0.000315957	AL359538.1, ATP12A	ATP12A
1	q25.1	rs3766694	174643207:175643207	CED	0.0173269	0.00634561	0.00266654	1.74465e-05	0.00982299	0.00228686	0.139989		0.992847	0.000429908	0.0483072	0.0225825	-0.107202	0.0470098	0.00486104		0.00632764	0.00266249	0.0174735	0.00954671	0.00228416	2.92115e-05	KIAA0040	KIAA0040
1	p32.1	rs11207416	59142102:60142102	AED	0.0182212	-0.0051011	0.00216046	0.279892	-0.00201063	0.00186073	0.0256573		0.0895021	0.0667049	0.0392894	0.0650283	0.0683407	0.0370432	0.0450486		-0.00488463	0.0021572	0.0235533	-0.00183357	0.00185839	0.323817	RP11-470E16.1	AC093425.1
10	q25.3	rs4918889	115330718:116330718	CED	0.0190289	-0.00477808	0.00203757	0.00247389	-0.0053223	0.00175853	0.282406		6.54499e-05	0.35406	0.0886844	0.0895771	0.151132	0.0890231	0.0531645		-0.00458876	0.00203703	0.0242801	-0.00526127	0.00175819	0.00276754	ADRB1, RNU6-709P	VWA2, NHLRC2, ADRB1, DCLRE1A
13	q34	rs7334306	110462520:111462520	OED	0.0191598	-0.00750346	0.00320328	0.426729	0.00219398	0.00276041	0.0145867		0.755952	-0.0131866	0.0424296	0.141919	-0.0595282	0.0405307	0.140575		-0.00753567	0.00319419	0.0183154	0.001909	0.00275403	0.488205	COL4A2	RAB20
21	q22.3	rs137923903	44329595:45329595	CED	0.0200694	-0.0159577	0.00686331	2.36042e-05	-0.0246737	0.00583598	0.33331		0.774572	0.0355409	0.124082	0.110076	-0.214796	0.134427	0.085592		-0.0158006	0.00685283	0.0211271	-0.0250314	0.00583049	1.76129e-05	AP001046.6, SIK1
18	q21.1	rs8098210	44531657:45531657	OED	0.0214904	-0.00360686	0.00156869	0.552225	0.000801156	0.00134777	0.00766942		0.544856	0.0195869	0.0323581	0.0276069	0.0670977	0.030461	0.0647357		-0.00355248	0.00156685	0.0233735	0.000930691	0.00134645	0.489429	RP11-157P23.2
1	q42.2	rs2478539	230344772:231344772	SSE	0.0219765	0.00363772	0.00158797	1.47789e-13	0.010074	0.00136326	0.000996621		0.0561995	0.0810361	0.0424401	0.679975	-0.0171665	0.0416169	0.011833		0.00374593	0.00158686	0.0182458	0.0100448	0.00136253	1.67869e-13	AGT	AGT, COG2
16	p13.3	rs8061324	3041490:4041490	CED	0.0221293	0.00457395	0.00199896	3.35053e-08	0.00953321	0.00172632	0.00145021		0.614159	-0.0146336	0.0290251	0.0071229	0.0736965	0.0273818	0.0134268		0.00448328	0.00199424	0.0245687	0.00978724	0.0017229	1.34161e-08	LA16c-306E5.3	CLUAP1, NAA60, TRAP1, AC025283.3, NLRC3, ZNF174
8	p23.1	rs6991320	10022949:11022949	CED	0.0223222	-0.00498145	0.0021802	1.60421e-08	-0.010599	0.00187584	0.020989		0.0136734	-0.102932	0.0417453	0.989616	-0.000499125	0.0383436	0.025847		-0.00524789	0.00217723	0.0159372	-0.0105749	0.0018736	1.65994e-08	RP1L1	RP1L1, SOX7, PINX1, C8orf74, AF131215.2, FAM167A, BLK, MSRA
5	q31.2	rs41298968	136534169:137534169	AED	0.0226055	-0.00456775	0.00200335	4.31118e-08	-0.00942335	0.00172027	0.0331941		0.759476	-0.0107	0.0349482	0.0103163	0.0830628	0.0323821	0.00893107		-0.00458783	0.00200007	0.0217996	-0.00916307	0.00171785	9.60501e-08	KLHL3	PKD2L2, HNRNPA0, KLHL3, KDM3B
12	q24.31	rs28625019	123407563:124407563	CED	0.02275	-0.00472667	0.00207526	0.00139325	-0.00571258	0.00178736	0.0377951		0.00551801	0.14222	0.051252	0.980536	0.00120927	0.0494799	0.00852756		-0.00448614	0.00207356	0.0305031	-0.00570356	0.0017862	0.00140738	RILPL2	ABCB9, PITPNM2, ARL6IP4, KMT5A, MPHOSPH9, C12orf65, CDK2AP1, SBNO1, EIF2B1
11	q13.1	rs10750766	64973798:65973798	SSE	0.0238711	0.0038818	0.0017182	1.21435e-13	0.0109444	0.00147583	0.000428279		0.000496819	-0.127523	0.0366189	0.376105	0.02952	0.0333537	0.000760771		0.00359314	0.00171631	0.0363026	0.0109807	0.00147439	9.5029e-14	RN7SL309P, KAT5	EFEMP2, RNASEH2C, SNX32, OVOL1, LTBP3, PCNX3, FIBP, KCNK7, SIPA1, POLA2, CTSW, MAP3K11, SPDYC
1	q43	rs7535162	242925689:243925689	CED	0.024486	0.00382395	0.00169996	1.31517e-07	0.00773413	0.00146565	0.00134076		0.0297392	0.198326	0.091248	0.0739452	-0.174755	0.0977932	0.00264079		0.00389143	0.00169967	0.0220486	0.00769315	0.00146549	1.52466e-07	SDCCAG8	CEP170, SDCCAG8
20	q13.2	rs6021247	49608980:50608980	CED	0.0252641	0.00348843	0.00155917	3.94151e-09	0.00788581	0.00133955	0.0251104		0.133798	-0.0465414	0.0310408	0.82128	-0.0065645	0.0290584	0.0971149		0.00336252	0.00155721	0.0308247	0.00785517	0.00133813	4.35108e-09	NFATC2	NFATC2
11	q21	rs2186739	94827374:95827374	AED	0.025688	-0.0105635	0.00473506	0.291891	0.00430912	0.00408841	0.0174358		0.0527177	-0.0621222	0.032068	0.906055	-0.00354929	0.0300752	0.0727033		-0.0116636	0.00468427	0.0127759	0.00416653	0.00405115	0.303723	RP11-338H14.1, RP11-644L4.1	SESN3
3	p21.31	rs7638388	47414974:48414974	CED	0.0277904	0.00595612	0.00270702	0.000603686	0.00800045	0.00233249	0.20315		0.0082416	-0.170813	0.0646529	0.850282	0.0109993	0.0582646	0.00114823		0.00564677	0.00270465	0.0368159	0.00800525	0.00233062	0.000592969	MAP4	MAP4, MON1A, MRPS18AP1, SPINK8, ZNF589, AMT, ALS2CL, ATRIP, SCAP, SHISA5, CAMKV
5	q13.2	rs891004	71314128:72314128	AED	0.0305433	0.00507804	0.00234769	0.704233	-0.000760681	0.00200383	0.00977755		0.0911092	-0.0494497	0.0292701	0.00691668	0.0745693	0.0276098	0.00102742		0.00472949	0.00234017	0.0432799	-0.000365968	0.00199857	0.854708	ZNF366, CTC-347C20.2	FCHO2, TMEM171
6	q27	rs9294987	169220237:170220237	AED	0.0315197	0.00498149	0.00231647	0.968295	-7.87922e-05	0.00198234	0.0291342		0.803397	0.00797809	0.0320591	0.0415997	0.0609634	0.0299236	0.113483		0.00499705	0.00231045	0.0305559	0.000187928	0.001978	0.924308	XXyac-YX65C7_A.4, RP1-137D17.1
1	p36.32	rs2493291	2829384:3829384	CED	0.0336546	0.00481696	0.00226766	4.37071e-05	0.00796552	0.00194897	0.20095		0.735851	0.0141001	0.0418055	0.105577	0.0628152	0.0388155	0.0406948		0.00484419	0.00226433	0.0324074	0.00810346	0.00194652	3.1402e-05	PRDM16	PRDM16
5	q31.1	rs17622656	131320997:132320997	CED	0.0339437	-0.00338196	0.00159469	3.88425e-09	-0.00807897	0.0013718	0.00608191		0.20699	-0.0403679	0.0319888	0.0083875	0.0775812	0.0294355	0.00333104		-0.00347365	0.00159271	0.029186	-0.00789333	0.00137031	8.39951e-09	IRF1	SLC22A5, MIR3936HG, PDLIM4, SLC22A4, IRF1, RAD50, AC116366.1, SHROOM1, P4HA2
16	q23.3	rs7500448	82545790:83545790	AED	0.03453	0.0037417	0.00177009	0.00184974	-0.00474251	0.00152326	0.000280083		0.00239697	0.088853	0.0292691	0.191312	0.0362355	0.0277231	0.0141938		0.00405185	0.00176686	0.0218338	-0.00461917	0.00152097	0.00238947	CDH13	CDH13
17	q25.3	rs7221314	76258251:77258251	CED	0.0346019	-0.00329582	0.00155978	5.14686e-05	-0.00541355	0.00133703	0.00961549		6.55394e-05	-0.124103	0.0310883	0.708873	0.0107817	0.0288716	0.000615111		-0.00359916	0.00155782	0.020867	-0.00537889	0.0013356	5.64145e-05	CYTH1	CYTH1, TIMP2, USP36
17	p13.1	rs12951053	7077407:8077407	CED	0.0354271	-0.00581464	0.00276432	0.000231073	-0.00871336	0.00236619	0.108784		0.329986	-0.0473935	0.0486514	0.039044	-0.0961464	0.0465891	0.0137764		-0.00594844	0.00275987	0.0311356	-0.00893831	0.00236314	0.000155336	TP53	SLC35G6, ZBTB4
16	q22.1	rs17881561	70013010:71013010	AED	0.0392017	0.00413753	0.00200648	0.421688	0.00138609	0.00172507	0.12969		0.00833027	0.869275	0.329473	0.790043	0.0936634	0.351783	0.020497		0.00416961	0.00200644	0.037699	0.00138831	0.00172505	0.420939	FUK	CLEC18A, PDXDC2P, CLEC18B, EXOSC6, COG4, CMTR2
8	p23.1	rs7008695	9471963:10471963	AED	0.0409117	-0.00334813	0.00163768	4.13732e-08	-0.00770713	0.0014051	0.0433762		0.0591811	-0.0966365	0.051215	0.512002	-0.0309552	0.0472053	0.0760297		-0.00344342	0.00163684	0.035405	-0.00772771	0.00140448	3.75095e-08	MSRA	MSRA
1	q32.1	rs2820321	201380296:202380296	CED	0.041147	-0.00350554	0.00171667	1.3414e-06	-0.00713612	0.00147634	0.0298485		0.908708	-0.00350012	0.0305229	0.00888107	0.0746807	0.0285434	0.0161597		-0.00350552	0.00171396	0.0408277	-0.00691783	0.00147437	2.7047e-06	LMOD1	SHISA4, LMOD1, RNPEP, IPO9, AL513217.1
8	q24.3	rs145183312	143517469:144517469	CED	0.0413744	0.00320782	0.00157263	5.487e-11	0.00882883	0.00134638	0.0018861		0.430726	0.0232184	0.0294712	0.0240445	0.0628058	0.0278325	0.00965827		0.00326464	0.0015704	0.03763	0.00895485	0.00134481	2.76013e-11	CYP11B2, RP11-273G15.2	LY6D, LY6E, GML, LYNX1, THEM6, LYPD2
2	q34	rs1047891	211040507:212040507	CED	0.0417427	-0.00319278	0.00156809	3.16788e-05	-0.00560871	0.00134788	0.0569391		0.0638656	0.054829	0.0295876	0.322976	0.027586	0.0279105	0.0925388		-0.00303026	0.00156589	0.0529697	-0.00553147	0.00134631	3.98039e-05	CPS1	PHGDH, AARS, PSAT1
13	q34	rs11619038	110423799:111423799	AED	0.0425934	0.00412029	0.00203201	0.137719	0.00259245	0.00174652	0.127419		0.517499	-0.0204568	0.0316097	0.0646758	0.0549616	0.0297479	0.0140406		0.00401914	0.00202782	0.0474795	0.00277234	0.00174352	0.111815	COL4A1
6	p22.1	rs9393897	27627710:28627710	CED	0.0431709	-0.00629798	0.00311462	2.61919e-07	-0.0136937	0.00265941	0.0157662		0.00993463	-0.083474	0.0323782	0.605482	-0.0155696	0.030143	0.012065		-0.00700558	0.00310031	0.0238437	-0.0137082	0.00264912	2.28375e-07	ZKSCAN8, ZNF192P1	ZSCAN12P1, IER3, BTN3A2, FBRSL1, PGBD1, ZKSCAN4, ZNF389, ZSCAN23, ZNF192P1, ZSCAN9, ZKSCAN8, ZSCAN31, ZNF602P, ZNF603P, ZSCAN16, GUSBP2, ZNF165
6	p22.1	rs4289643	28159035:29159035	AED	0.0437384	-0.00473203	0.00234654	3.05682e-05	-0.00836804	0.00200707	0.0043971		0.00245485	-0.0985979	0.0325529	0.525148	0.0189493	0.0298299	0.003881		-0.00521724	0.00234047	0.0258042	-0.00824493	0.00200254	3.83452e-05	LINC00533, RPSAP2	ZNF192P2, ZSCAN12P1, BTN3A2, OR2B8P, ZBED9, PGBD1, ZNF311, ZNF192P1, TRIM27, ZSCAN31, ZSCAN26, ZSCAN9, ZKSCAN3, ZNF603P, ZFP57, OR2J3, ZSCAN23
10	p12.31	rs7923191	18227901:19227901	CED	0.0459691	0.00389266	0.00195053	1.01942e-09	0.0102126	0.00167237	0.00486855		0.824028	-0.00794044	0.0357123	0.00193711	-0.107953	0.0348269	0.0117453		0.00385747	0.00194763	0.0476364	0.00994075	0.00167045	2.66574e-09	CACNB2
5	q14.3	rs34712971	86801956:87801956	SSE	0.0473727	-0.00406269	0.0020488	2.55052e-12	-0.0123146	0.00175899	0.000140455		0.833417	0.00769035	0.0365462	0.000478046	-0.124492	0.035643	0.00438577		-0.00402587	0.00204559	0.0490595	-0.0125871	0.00175685	7.80146e-13	CTD-2316B1.2, TMEM161B	MEF2C
10	q21.3	rs7090758	64835315:65835315	AED	0.0475175	-0.00309578	0.00156221	5.79472e-08	-0.0072701	0.00134005	0.00107813		0.167537	0.0472747	0.0342572	0.000518447	0.110109	0.0317202	0.0283047		-0.00299125	0.00156059	0.0552705	-0.00706098	0.00133886	1.33559e-07	REEP3	MYL9, NRBF2, CLU, REEP3, MRPL35P2, ITGA2B, PTGS1, VSIG2, JMJD1C, PPBP, AQP10
6	p21.2	rs62398607	38645523:39645523	CED	0.0478307	-0.00380391	0.00192225	1.899e-08	-0.00924551	0.00164476	0.00353501		0.887156	0.0127188	0.0896113	0.109097	0.130116	0.0812059	0.143688		-0.00379631	0.00192181	0.0482245	-0.00918836	0.00164442	2.3024e-08	SAYSD1, KCNK5	SAYSD1, ANKRD18EP
1	p13.2	rs12126684	112723233:113723233	AED	0.0511213	0.00378941	0.00194282	6.5112e-07	0.00828214	0.00166456	0.0648326		0.00992598	-0.16922	0.0656302	0.924131	0.00550482	0.057771	0.016726		0.00363793	0.00194197	0.061024	0.00827984	0.00166387	6.48268e-07	MOV10	MOV10, ST7L, WNT2B
16	p12.1	rs2188717	24230230:25230230	CED	0.0525589	-0.00341947	0.00176394	0.000196307	-0.00562137	0.00150958	0.00041423		0.59874	-0.0656538	0.124766	0.00901882	-0.340447	0.130373	0.00113415		-0.00343191	0.00176376	0.0516804	-0.00566625	0.00150948	0.000174186	AC012317.1, TNRC6A	SLC5A11, TNRC6A
5	q14.3	rs17420814	87318045:88318045	SSE	0.0534479	-0.00497176	0.00257431	1.66311e-10	-0.0140844	0.00220414	0.000766887		0.351484	-0.0494266	0.0530478	0.027078	-0.113393	0.0512998	0.0891454		-0.0050762	0.00257128	0.0483601	-0.0142674	0.00220211	9.23514e-11	LINC00461	MEF2C, TMEM161B, TMEM161B-AS1
11	p15.1	rs5219	16909572:17909572	CED	0.0547548	-0.00311934	0.00162395	1.8497e-09	-0.00838135	0.00139439	0.0134935		0.655962	-0.0136629	0.0306677	0.00796608	0.0759513	0.02862	0.0148017		-0.00314882	0.00162168	0.0521727	-0.00818164	0.00139274	4.24117e-09	KCNJ11	AC124798.1, ABCC8, NUCB2, PIK3C2A, NCR3LG1, OR7E14P, KCNJ11
11	q24.1	rs7129204	122027212:123027212	CED	0.0557809	0.00457986	0.00239438	3.04113e-08	0.01139	0.00205622	0.0309468		0.0208779	-0.0691036	0.0299128	0.58417	0.0153614	0.028059	0.0102971		0.00411076	0.00238675	0.0850103	0.0114112	0.00205072	2.62922e-08	UBASH3B	MIR100HG, UBASH3B
13	q34	rs66656189	110407856:111407856	AED	0.0571739	0.00377	0.00198213	0.876963	0.000263663	0.00170303	0.0254118		0.0906869	0.0488473	0.0288747	0.880524	-0.00409839	0.0272663	0.0259824		0.00398142	0.00197748	0.0440742	0.000246712	0.00169972	0.884593	COL4A1	COL4A1
15	q22.31	rs11071908	66442853:67442853	CED	0.0582377	0.00300548	0.00158691	0.000251277	0.00497316	0.00135841	0.0868731		0.188426	-0.0408543	0.0310631	0.0151731	0.0711665	0.0293056	0.00435643		0.00289131	0.00158484	0.068099	0.00511508	0.00135695	0.000163553	RP11-321F6.1
8	p23.1	rs6991853	9567157:10567157	SSE	0.0597451	0.00348514	0.00185116	1.04721e-09	0.00965603	0.00158235	0.00377874		0.712761	-0.0259693	0.0705386	0.0433162	0.127381	0.0630363	0.0217067		0.00346487	0.00185052	0.0611551	0.00973016	0.00158185	7.69362e-10	MSRA	MSRA, AF131215.2
15	q15.1	rs8038764	41407905:42407905	AED	0.0659668	0.00290706	0.00158107	2.28138e-06	0.00640216	0.00135441	0.00963572		0.516353	-0.0251332	0.0387265	0.0308311	-0.0800069	0.0370531	0.0187701		0.0028604	0.00157975	0.0701932	0.00628686	0.00135351	3.4029e-06	RP11-380D11.2, MGA	GCHFR, MAPKBP1, PLA2G4B, JMJD7-PLA2G4B, RPAP1, JMJD7, TYRO3
7	p22.3	rs12699561	1518418:2518418	CED	0.0682483	0.00290353	0.00159239	3.47413e-07	0.00698198	0.00137012	0.036907		0.00298452	-0.09045	0.0304614	0.216585	0.0351644	0.0284606	0.00121152		0.00264911	0.00159022	0.0957373	0.00704714	0.00136854	2.61312e-07	MAD1L1	MRM2, TONSL, AC104129.1, MAD1L1, PDE4DIP, STARD3
11	p15.5	rs73413011	1441481:2441481	CED	0.0692591	-0.00719837	0.00396225	6.23577e-06	-0.0155321	0.00343756	0.057096		0.0314448	-0.106586	0.0495428	0.506651	0.0295394	0.0444832	0.0204543		-0.00783003	0.00394964	0.0474269	-0.0152645	0.00342734	8.43815e-06	AC051649.1	LSP1, TNNT3
4	q25	rs7440002	111181501:112181501	AED	0.0702147	-0.00561848	0.00310321	0.18517	0.003521	0.00265735	0.0252834		0.00905298	-0.0970022	0.0371649	0.396571	-0.0293681	0.0346416	0.00032214		-0.0062512	0.00309245	0.0432344	0.0033286	0.00264957	0.209014	PITX2, RP11-777N19.1
8	p23.1	rs2980423	7642575:8642575	CED	0.0706802	0.00283244	0.00156702	2.01672e-08	0.00755969	0.00134735	0.0115065		0.00439736	-0.0829904	0.0291385	0.74028	0.00903902	0.0272792	0.0105586		0.00258495	0.00156476	0.098539	0.00756329	0.00134571	1.90627e-08	FAM86B3P, SGK223	ALG1L13P, AC103957.2, ENPP7P1, FAM86B3P, RPL10P19, FDFT1, NEIL2, MSRA, FAM66A, CLDN23, MFHAS1, PRAG1, FAM167A, BLK, ERI1, FAM85B
3	p21.31	rs143311886	49121367:50121367	AED	0.0776487	-0.00428578	0.00242888	0.0314127	-0.00447303	0.00207872	0.0936674		0.0129733	0.213012	0.0857384	0.528199	0.0524217	0.0831177	0.000589923		-0.00411153	0.00242791	0.0903703	-0.00443747	0.00207807	0.0327301	BSN	APEH, WDR53, HYAL3, WDR6, DALRD3, AMT, USP19, IP6K2, UBA7, GPX1, GMPPB, P4HTM, KLHDC8B, DCUN1D1, NICN1, LAMB2, CRBN, RBM6
17	q23.3	rs6504213	61881714:62881714	CED	0.0781046	0.00279501	0.00158645	1.34288e-06	0.00659119	0.00136366	0.0326188		0.287438	0.0402298	0.0378152	0.0056649	-0.101826	0.036806	0.00258003		0.00286078	0.00158506	0.0710989	0.00644257	0.00136273	2.27065e-06	TEX2, RPL31P57	TEX2
8	p23.1	rs7838131	11096163:12096163	SSE	0.0789974	-0.00278029	0.00158282	3.80613e-13	-0.00983454	0.0013541	0.000122412		0.00112608	0.0940275	0.0288678	0.352975	0.0253753	0.0273156	0.00276527		-0.00249013	0.00158045	0.115122	-0.00974823	0.00135244	5.68276e-13	GATA4	FAM86B3P, AF131215.6, FAM66D, FDFT1, NEIL2, CTSB, AC145124.1, GATA4, FAM66A, AF131216.3, AF131215.2, PRAG1, FAM167A, AC130352.1, BLK, MSRA
4	q32.1	rs17033041	155891307:156891307	CED	0.0871569	0.00274415	0.0016042	6.61015e-06	0.00619684	0.00137524	0.0961832		0.827257	-0.00852927	0.0390867	0.0594101	0.0681725	0.0361576	0.0366165		0.00272519	0.00160285	0.0890903	0.00628637	0.00137425	4.77563e-06	MTND1P22, RP13-487K5.1	GUCY1A1, AC104083.1
8	p23.1	rs17150796	9284034:10284034	CED	0.0944171	-0.00270273	0.00161593	0.000334602	-0.00497342	0.00138652	0.137103		0.0130602	0.0739287	0.0297861	0.835731	-0.00589233	0.0284195	0.0262587		-0.00247785	0.00161356	0.124626	-0.0049756	0.00138487	0.000327116	LINC00599, snoU13	FDFT1, MSRA
6	p12.1	rs10081146	55576740:56576740	AED	0.100743	0.00424403	0.00258582	0.214278	-0.00274858	0.00221322	0.0399325		0.546223	-0.0213207	0.0353341	0.0105943	0.0831548	0.0325334	0.00995782		0.00410784	0.00257892	0.111193	-0.00235285	0.00220812	0.286628	COL21A1	COL21A1
12	p13.1	rs6488549	12390168:13390168	SSE	0.100815	-0.00258972	0.00157821	6.14537e-11	-0.00884309	0.00135205	4.88477e-05		0.259449	0.0328447	0.0291222	0.0152677	0.0668078	0.0275389	0.0024581		-0.00248596	0.0015759	0.114683	-0.00866118	0.00135042	1.42052e-10	APOLD1	APOLD1, CDKN1B, GPR19
8	q12.3	rs16930710	64265141:65265141	AED	0.113214	0.00317084	0.0020019	0.00725933	-0.00459863	0.00171288	0.000590266		0.00614904	-0.104454	0.0381261	0.606363	-0.0182505	0.0354185	0.0153122		0.00287493	0.00199915	0.150411	-0.00463048	0.00171088	0.00679982	RP11-32K4.1
4	p14	rs4488948	37827029:38827029	AED	0.121266	-0.00264293	0.00170568	7.39247e-05	-0.00578491	0.00145959	0.00882509		0.0154856	0.0713248	0.0294625	0.758197	-0.00865031	0.0281005	0.0247484		-0.00239585	0.00170283	0.159433	-0.00579262	0.00145763	7.06719e-05	RP11-600L4.1, RP11-83C7.1	LINC02513
20	p12.2	rs889509	10124190:11124190	CED	0.124998	-0.00322648	0.00210313	0.0398667	-0.00370785	0.00180418	0.0293768		0.527641	0.0184782	0.0292668	0.0384084	-0.0575338	0.0277878	0.0171578		-0.00311497	0.00209772	0.137562	-0.0039338	0.00180039	0.0288909	JAG1	SLX4IP, MKKS
15	q26.2	rs4984497	96135899:97135899	AED	0.132452	-0.00249047	0.00165534	0.344039	0.00134925	0.00142594	0.056534		0.261946	0.0345077	0.0307579	0.762434	0.00890027	0.0294594	0.21535		-0.00238362	0.00165295	0.149291	0.0013669	0.00142427	0.337197	RP11-236L14.1, NR2F2-AS1
17	q21.31	rs71373532	42653235:43653235	CED	0.136646	0.00252824	0.00169862	7.27698e-05	0.00580373	0.00146296	0.00962793		0.662354	0.0136169	0.0311746	0.0132687	-0.0743917	0.0300394	0.0210316		0.00256106	0.0016961	0.131052	0.00561397	0.00146123	0.000122059	NMT1	EFTUD2, DCAKD, HEXIM2, ACBD4, NMT1
6	q27	rs9689079	169087148:170087148	CED	0.146048	0.00560871	0.00385839	0.00424317	0.00939865	0.00328678	0.155282		0.00464659	0.184453	0.0651681	0.980764	-0.00158726	0.0658375	0.0223065		0.00623345	0.00385165	0.10558	0.00937134	0.00328269	0.00430677	RP11-417E7.2, XXyac-YX65C7_A.2	LINC01615, LINC02544
6	q22.1	rs210639	117393104:118393104	CED	0.147508	-0.00311541	0.00215094	0.000174041	-0.00690902	0.00184041	0.042216		0.981834	0.000889604	0.0390772	0.0331137	0.0776552	0.0364438	0.0209109		-0.00310331	0.00214769	0.148471	-0.00669391	0.00183807	0.000270719	GOPC	GOPC, DCBLD1
8	q24.3	rs10096038	140595080:141595080	AED	0.152426	-0.00244654	0.00170964	5.01255e-05	-0.00596803	0.00147172	0.0226274		0.750748	0.00982161	0.030914	0.010377	0.0739658	0.0288589	0.0100353		-0.00240913	0.00170703	0.158156	-0.00576069	0.00146981	8.87917e-05	TRAPPC9	TRAPPC9
6	p21.33	rs12665166	30708242:31708242	AED	0.158582	0.00230548	0.00163525	7.1948e-07	0.00694387	0.00140105	0.000890223		0.137979	0.310583	0.209381	0.0244988	0.433314	0.19265	0.00324246		0.00232428	0.0016352	0.155199	0.00696642	0.00140101	6.61236e-07	XXbac-BPG299F13.16, HLA-C	DDR1, LY6G5B, TCF19, PSORS1C3, NOTCH4, AL662844.4, TNF, MICB, VARS2, HLA-B, GZMK, MICA, HLA-C, CCHCR1, HLA-L, TMEM154, HLA-S
16	q21	rs35686695	60123261:61123261	CED	0.158883	-0.00261378	0.00185526	1.06636e-05	-0.00700735	0.00159136	0.0300765		0.0495384	0.0561346	0.0285842	0.739235	0.0090192	0.0270928	0.00434308		-0.00236733	0.00185136	0.201005	-0.00695225	0.00158862	1.20724e-05	RP11-354I13.1, GNPATP
12	p12.2	rs17375682	19924229:20924229	CED	0.160587	0.00222611	0.00158656	0.0197634	0.00317096	0.00136044	0.23155		0.208407	-0.0451239	0.0358702	0.031108	-0.0745005	0.0345602	0.0773777		0.00213366	0.00158501	0.178255	0.00305079	0.00135939	0.024817	CTC-465D4.1, RP11-284H19.1
3	p25.1	rs13062241	14423230:15423230	CED	0.163064	0.00376341	0.00269808	8.49019e-06	0.0103205	0.00231789	0.0652659		0.404164	-0.0433961	0.0520202	0.0281661	-0.108508	0.0494349	0.0438235		0.00363689	0.00269446	0.177091	0.0100598	0.00231535	1.3937e-05	FGD5	FGD5
10	q26.13	rs72830780	123635862:124635862	CED	0.174675	-0.00211934	0.0015614	0.000422479	-0.00472659	0.00134062	0.17856		0.759471	0.0133406	0.0435908	0.0587556	0.0755712	0.0399801	0.0316272		-0.00209953	0.0015604	0.178461	-0.0046364	0.00133987	0.00053948	PLEKHA1	PLEKHA1
3	p21.31	rs34221642	48465078:49465078	CED	0.190968	0.00849539	0.00649631	0.0025608	0.0170025	0.00563724	0.193107		0.864488	-0.0248851	0.145813	0.0544574	-0.289567	0.150565	0.103329		0.00842926	0.00648987	0.194001	0.0165734	0.00563329	0.00326062	ARIH2	WDR6, ZNF589, AMT, UBA7, IP6K2, ARIH2, P4HTM, NCKIPSD
21	q22.11	rs28451064	35093827:36093827	AED	0.198103	0.00205951	0.00160026	0.0106945	0.00351561	0.00137729	0.133225		0.0285969	-0.0651328	0.0297545	0.646592	0.0127978	0.0279002	0.0280298		0.00186572	0.00159795	0.242981	0.00353817	0.00137561	0.0101093	AP000320.7	SLC5A3, AP000317.1, MRPS6, LINC00310, LINC00649
9	q31.2	rs4743021	108914561:109914561	SSE	0.198976	0.00218387	0.0017002	4.15106e-08	0.0079826	0.00145548	0.00309377		0.21059	-0.0380269	0.0303751	0.00024543	0.103405	0.0282011	0.00032214		0.00205828	0.00169754	0.225319	0.0082361	0.00145355	1.45988e-08	RP11-308N19.4
5	q35.2	rs72812818	172856752:173856752	AED	0.203099	-0.00219092	0.00172137	1.14522e-06	-0.00718038	0.00147591	0.00262444		0.749812	-0.010016	0.0314061	0.00586489	0.0810545	0.0294163	0.0124484		-0.00221436	0.00171879	0.197634	-0.00695882	0.00147406	2.34843e-06	CPEB4	C5orf47, CPEB4, NSG2
7	q31.1	rs17155335	107389683:108389683	CED	0.205093	0.00198334	0.00156516	5.48198e-05	0.00543331	0.00134683	0.00751842		0.67683	-0.0125676	0.0301527	0.00443018	-0.081402	0.0286045	0.00172922		0.00194424	0.00156306	0.213547	0.00524123	0.00134534	9.78594e-05	NRCAM	PNPLA8, NRCAM
8	p23.1	rs922050	8721049:9721049	SSE	0.226049	0.00192094	0.00158676	1.04565e-09	0.008321	0.00136352	0.000404622		0.892863	0.00438039	0.0324857	0.00441376	0.0860676	0.030236	0.00197563		0.00192679	0.00158487	0.224083	0.00847879	0.00136214	4.82701e-10	RP11-115J16.1	MFHAS1
7	p22.3	rs73033340	695692:1695692	CED	0.231825	-0.00529591	0.00442922	1.51378e-06	-0.018105	0.00376439	0.00466981		0.964088	-0.00642258	0.142647	0.0107809	-0.418984	0.164326	0.0202859		-0.005297	0.00442709	0.231503	-0.0183153	0.0037634	1.13491e-06	ZFAND2A	ZFAND2A
14	q11.2	rs35085068	22909909:23909909	CED	0.237091	-0.00196336	0.00166063	0.00251686	-0.00431334	0.00142762	0.0364525		0.20908	0.0509877	0.0405961	0.000694467	0.127408	0.0375626	0.0271873		-0.0018749	0.00165924	0.258486	-0.00412334	0.00142659	0.00384813	RP11-298I3.1	PRMT5, AJUBA, REM2, RBM23, AL132780.1, C14orf93, HAUS4
11	p15.5	rs138429802	371030:1371030	AED	0.257334	-0.00713775	0.00630143	0.000140499	-0.0207035	0.00543774	0.0179567		0.78674	-0.00816323	0.0301748	0.0149293	-0.0703002	0.0288816	0.0370051		-0.0071806	0.00616836	0.244383	-0.0224014	0.00534385	2.76505e-05	CHID1	PNPLA2, CD151, PIDD1, CHID1, AP006621.1, AP006621.5, CRACR2B, TSPAN4, AP2A2
4	p11	rs13109500	48323980:49323980	CED	0.260353	-0.00195619	0.00173797	0.00138347	-0.00476503	0.00148995	0.0828697		0.988019	0.00052986	0.0351838	0.00646838	-0.092146	0.0338392	0.0112793		-0.00195014	0.00173585	0.261248	-0.0049341	0.00148851	0.000917089	OCIAD1	ZAR1, OCIAD1, OCIAD2, SLC10A4, SPATA18, NFXL1, FRYL
13	q34	rs9549328	113136156:114136156	AED	0.289766	-0.00259844	0.00245451	6.7407e-05	0.00837967	0.00210262	0.000681977		0.00276781	0.0881574	0.0294609	0.473107	0.0200379	0.0279364	0.0429444		-0.00197282	0.00244604	0.419932	0.00844534	0.00209669	5.62679e-05	MCF2L	AL356740.1, MCF2L, MCF2L-AS1
2	q14.1	rs112641450	113903586:114903586	AED	0.291464	0.00165238	0.00156636	2.95368e-05	0.00561168	0.00134344	0.0300199		0.756323	0.0162768	0.0524653	0.0177492	-0.123621	0.0521428	0.0290792		0.0016654	0.00156566	0.287462	0.00552595	0.00134299	3.87769e-05	RABL2A, RP11-395L14.17	PAX8, PSD4, AC010982.1, RPL23AP7, DDX11L2
12	q21.33	rs10858935	89723202:90723202	CED	0.293492	0.00183071	0.00174271	0.00154085	0.00473874	0.00149632	0.184581		0.835219	0.0111674	0.0537025	0.00558436	0.135588	0.0489279	0.0433908		0.00184053	0.00174179	0.290654	0.004861	0.00149562	0.00115341	RNU6-148P, RP11-654D12.2	POC1B
21	q22.2	rs762384	39574396:40574396	CED	0.295802	0.0018861	0.00180405	0.00755688	0.00413475	0.00154785	0.158447		0.0063925	-0.0810756	0.0297315	0.279044	-0.0304056	0.028087	0.00796683		0.00158177	0.00180074	0.379726	0.00403017	0.0015455	0.00911606	ERG, LINC00114	ERG
12	q24.11	rs10774611	110883036:111883036	AED	0.297538	-0.00167202	0.00160504	5.05932e-07	-0.00691535	0.0013764	0.00894469		0.0128567	-0.0807373	0.0324545	0.137799	0.04461	0.0300623	0.0023024		-0.00186493	0.00160308	0.244692	-0.00680757	0.00137496	7.37944e-07	RP1-46F2.2	FAM216A, LINC01405, MAPKAPK5-AS1, TCTN1, SH2B3, GPN3
20	q13.33	rs6742	61874441:62874441	CED	0.298835	0.0022226	0.0021393	9.91046e-08	0.00978317	0.00183599	0.00731112		0.0039634	0.293677	0.101937	0.0567217	-0.21449	0.112569	0.000218748		0.00235091	0.00213883	0.2717	0.00972353	0.00183575	1.17868e-07	SLC2A4RG	STMN3, ZGPAT
8	q22.1	rs28419772	95521436:96521436	CED	0.299704	0.00226257	0.00218169	6.38882e-06	0.00844194	0.00187049	0.0315337		0.00134622	0.442748	0.138103	0.446229	0.111586	0.146501	8.96676e-05		0.00237247	0.00218142	0.27678	0.00845875	0.00187034	6.10904e-06	NDUFAF6	NDUFAF6, TP53INP1
3	p21.31	rs36022378	49413705:50413705	CED	0.301997	0.00354256	0.00343217	0.00573544	0.00819321	0.0029658	0.0134253		0.133643	-0.0431403	0.028762	0.0408116	0.0555955	0.027178	0.00629556		0.00288715	0.00340799	0.396901	0.00875105	0.0029483	0.00299579	ACTBP13	APEH, HYAL3, WDR6, AMT, USP19, UBA7, DALRD3, QRICH1, P4HTM, NICN1, CDHR4, MAPKAPK3, RBM6, INKA1
10	q24.33	rs7916056	104497914:105497914	AED	0.316458	0.00158858	0.00158578	6.71854e-05	0.00541366	0.00135812	0.0629858		0.916479	0.00505719	0.0482191	0.0171671	0.104477	0.0438377	0.0228779		0.00159233	0.00158492	0.315055	0.00550865	0.00135747	4.94882e-05	ST13P13, RPEL1	BORCS7, INA, PCGF6, ATP5MD, SH3PXD2A, CALHM2, WBP1L, CNNM2
8	q24.12	rs58659618	119920239:120920239	AED	0.330686	-0.00153169	0.00157463	0.0321896	0.00289496	0.00135148	0.0329048		0.000843809	0.0968544	0.0290117	0.900067	0.00347396	0.0276876	0.00284611		-0.00124271	0.00157232	0.429312	0.00289634	0.00134987	0.031902	SNORA32, NOV	CCN3, RPL10
3	p14.3	rs11926924	57299360:58299360	AED	0.337027	0.00158323	0.00164909	0.00303884	0.00419028	0.00141381	0.139076		0.00666254	0.146349	0.053938	0.406314	0.0438159	0.0527632	0.051977		0.00171842	0.00164832	0.297166	0.00421871	0.0014133	0.00283577	SLMAP	FLNB, DENND6A, SLMAP, ARF4
1	p13.2	rs10158127	112932444:113932444	AED	0.353669	0.0014606	0.00157477	4.59889e-05	0.00549761	0.00134903	0.042429		0.652391	0.0140903	0.0312691	0.043644	-0.0599783	0.0297291	0.0395163		0.00149255	0.00157278	0.342625	0.00536306	0.00134764	6.90348e-05	RP3-522D1.1, RP3-522D1.2	SLC16A1, AL357055.3
14	q11.2	rs440466	23374117:24374117	AED	0.379979	0.00206108	0.00234763	0.0947432	-0.0033625	0.00201239	0.0357226		0.00019451	-0.129619	0.0347874	0.959123	-0.00163634	0.0319201	0.00335646		0.0014641	0.0023423	0.531927	-0.00335567	0.0020084	0.0947585	MYH6
16	p13.3	rs3211995	1589006:2589006	AED	0.39093	0.00154691	0.00180307	0.00133543	0.00495547	0.00154458	0.0636591		0.565672	0.0166506	0.0289871	0.00560283	0.0751539	0.0271321	0.00730257		0.00160512	0.00179959	0.372427	0.00518224	0.00154208	0.000777897	SLC9A3R2	TSC2, NTHL1, SLC9A3R2, MIDN, RAB26, PKD1
1	p31.1	rs10782749	81161747:82161747	CED	0.433716	0.00166613	0.00212828	0.00248336	0.00551041	0.00182138	0.0310367		0.00763863	0.0781455	0.0292946	0.593831	-0.0148355	0.0278206	0.0106814		0.00206768	0.00212269	0.330013	0.00542358	0.00181749	0.0028441	RPL7P10, RP3-445O10.1
1	p34.2	rs2782652	43426305:44426305	CED	0.43739	0.0018301	0.00235652	6.79917e-05	0.00801393	0.00201188	0.0459628		0.0134827	-0.0712361	0.0288318	0.227625	0.0326027	0.0270257	0.00429895		0.00134523	0.00234869	0.566808	0.00814944	0.00200633	4.86812e-05	HYI-AS1, PTPRF	MPL, ST3GAL3, TIE1, ELOVL1, SZT2, HYI, CDC20, MED8
6	q25.3	rs75391241	159171268:160171268	CED	0.437683	-0.00167212	0.00215449	8.62647e-05	-0.00724197	0.00184444	0.0185607		0.0827602	-0.155104	0.089405	0.862072	-0.0134896	0.0776451	0.0322972		-0.00176117	0.00215386	0.413541	-0.00724549	0.00184392	8.51591e-05	FNDC1
12	q24.21	rs6490022	115430574:116430574	CED	0.438957	-0.001256	0.00162282	0.000114776	-0.00536362	0.00139058	0.0114844		0.170776	0.0414586	0.0302697	0.00347734	-0.0854893	0.0292566	0.00128252		-0.00113358	0.00162049	0.484222	-0.00554423	0.00138901	6.56594e-05	RP11-116D17.1, RP11-1028N23.3
15	q25.1	rs62012629	78570351:79570351	AED	0.460903	0.00135162	0.00183305	0.00297489	0.00464828	0.00156489	0.0228442		0.997905	-0.00013801	0.0525528	0.0145362	0.117258	0.0479843	0.0286418		0.00134981	0.00183194	0.461231	0.00476792	0.00156406	0.00230041	ADAMTS7	ADAMTS7P3, ADAMTS7, TBC1D2B
19	q13.2	rs9304578	38750337:39750337	AED	0.473548	0.00121993	0.0017021	0.03141	-0.00315307	0.00146528	0.0337461		0.00825251	0.0762293	0.0288625	0.158849	-0.0386961	0.0274654	0.00077105		0.00147989	0.00169915	0.383775	-0.00325395	0.0014632	0.026158	CAPN12	ACTN4, SARS2, LGALS7, AC022144.1, LGALS4, CAPN12, RINL, LGALS7B
6	q26	rs9365555	163257127:164257127	AED	0.493927	0.00108382	0.00158435	0.000801664	0.00456161	0.00136075	0.0433658		0.76837	-0.0101443	0.0344431	0.0276556	-0.0726653	0.0329979	0.0265937		0.00106011	0.00158268	0.502971	0.00443051	0.00135959	0.00111925	PACRG, RP3-495O10.1	QKI
7	q21.13	rs39239	89254827:90254827	AED	0.502085	0.0012227	0.00182162	0.00761956	-0.00417002	0.00156268	0.0246455		0.575798	-0.0194979	0.0348464	0.0128926	0.0796057	0.032013	0.0181138		0.00116623	0.00181914	0.521464	-0.00397087	0.00156082	0.0109562	DPY19L2P4	DPY19L2P2, AC002064.1, STEAP2-AS1, DPY19L2, CFAP69, STEAP1, STEAP2, DPY19L2P4, GTPBP10
21	q22.2	rs2836411	39319830:40319830	AED	0.532457	-0.00120435	0.00192924	0.0132621	0.00410357	0.00165689	0.0230749		0.0318512	0.0878643	0.0409353	0.381477	-0.0352511	0.0402776	0.0142092		-0.00100695	0.0019271	0.601306	0.00403709	0.00165549	0.0147441	ERG	KCNJ15
22	q13.2	rs739292	41868857:42868857	CED	0.540546	0.00095305	0.0015573	0.000974435	0.00441094	0.00133752	0.0228565		0.0256262	0.0673034	0.0301582	0.634914	0.0135478	0.0285181	0.038655		0.0011295	0.00155523	0.46768	0.00443099	0.00133605	0.000911575	LINC00634, SEPT3	CYP2D7, SMDT1, CCDC134, LINC00634, CYP2D6, NAGA, PHETA2, SNU13, L3MBTL2, AC254562.2, TNFRSF13C, NDUFA6, WBP2NL, AC254562.1
7	q36.1	rs73725602	148973261:149973261	AED	0.578993	0.00381846	0.00688188	0.00552728	0.0163688	0.00589951	0.108313		0.863736	0.0232086	0.135247	0.00859148	0.29658	0.11286	0.0184005		0.00386853	0.00687299	0.57353	0.0171324	0.00589147	0.00363751	SSPO	SSPO, ZNF467
1	p36.22	rs60259384	8939983:9939983	AED	0.585756	0.00137039	0.00251449	0.0174011	0.0051152	0.00215092	0.141482		0.346166	0.0356374	0.0378275	0.0526266	-0.0726008	0.0374602	0.00266906		0.00152114	0.00250895	0.544327	0.00485982	0.00214738	0.0236273	SPSB1, RNA5SP40
3	p22.1	rs7632387	41353161:42353161	CED	0.586064	0.00123058	0.00225981	0.0102282	0.00497449	0.00193707	0.00718714		0.671855	-0.012432	0.0293476	0.00429214	0.0790792	0.0276943	0.0116694		0.00115005	0.00225314	0.609757	0.00533526	0.00193235	0.00576202	ULK4	RPL36P20, ULK4
11	q23.2	rs7128648	112405129:113405129	AED	0.590584	0.000848064	0.00157635	0.00222217	0.00412925	0.00134993	0.0336781		0.362876	0.0332994	0.0365916	0.00221714	0.103675	0.0338895	0.0223318		0.000908177	0.00157489	0.564169	0.00428695	0.00134886	0.00148192	NCAM1	NCAM1
9	q32	rs117072385	116091380:117091380	CED	0.626182	-0.00176083	0.00361486	0.0103383	-0.00795773	0.00310324	0.174604		0.00956189	0.14647	0.0565223	0.173193	-0.0800004	0.058739	0.00273312		-0.00115701	0.00360749	0.74842	-0.00815825	0.00309892	0.00847311	AL157702.1, RP11-534I8.1
18	q11.2	rs11664194	19521031:20521031	AED	0.648363	-0.000724128	0.00158787	0.00233589	0.0041497	0.0013633	0.0105931		0.0697655	0.0534555	0.0294811	0.725693	-0.00978673	0.0278906	0.0360634		-0.000567409	0.00158557	0.72045	0.00411648	0.00136167	0.00250197	RP11-863N1.4, RPS4XP18
13	q34	rs656533	110293123:111293123	AED	0.67144	-0.00214965	0.00506786	0.0800791	-0.00762202	0.00435485	0.0716088		0.996275	-0.000150011	0.0320491	0.0767609	0.0532469	0.0300849	0.112232		-0.00210087	0.00500566	0.674706	-0.0063728	0.00430993	0.139239	RN7SL783P, COL4A1
18	q12.3	rs7236548	42597750:43597750	AED	0.673035	-0.000860516	0.0020392	2.19973e-05	0.00742349	0.0017493	0.00204697		0.292739	-0.0746772	0.0709789	0.0692723	0.116582	0.0641765	0.0228184		-0.000921394	0.00203836	0.651249	0.00750453	0.00174865	1.77379e-05	RP11-749H17.2
2	q31.2	rs59532220	179149461:180149461	CED	0.703388	0.000718959	0.00188826	0.00252874	0.00488934	0.00161903	0.0936103		0.373908	0.0278097	0.0312712	0.00993375	0.075126	0.0291439	0.0339135		0.000817377	0.00188483	0.664534	0.00510543	0.00161654	0.00158718	TTN	CCDC141
13	q34	rs4773140	110454237:111454237	AED	0.719238	0.000600325	0.00166999	0.0331783	0.00305957	0.00143646	0.201485		0.918462	0.0030653	0.0299099	0.00440196	-0.0820607	0.0288155	0.0202002		0.000607985	0.00166739	0.715386	0.00284857	0.00143468	0.0470879	COL4A1	RAB20
20	q12	rs7275102	39511753:40511753	AED	0.738095	-0.000521361	0.0015592	1.96535e-05	-0.00572275	0.00134057	0.00381359		0.550699	0.0435479	0.0729893	0.00549206	0.183621	0.0661263	0.0774819		-0.00050126	0.00155884	0.747787	-0.00564496	0.00134029	2.53418e-05	RP4-620E11.5, CHD6	CHD6, PLCG1
10	q22.2	rs2177843	74909877:75909877	CED	0.763489	-0.000475205	0.00157927	0.000334991	-0.00485936	0.00135483	0.00411313		0.952532	-0.00740434	0.124392	0.00668179	0.28323	0.104425	0.0348943		-0.000476322	0.00157914	0.762932	-0.00481087	0.00135472	0.000383471	SYNPO2L	FUT11, NDST2, CFAP70, FAM149B1, NUDT13, ECD, CHCHD1, MYOZ1, MRPS16, SYNPO2L
21	q22.2	rs117870289	39483448:40483448	CED	0.767753	-0.00257594	0.00872263	0.0651147	-0.0136329	0.00739117	0.33349		0.916872	0.0122447	0.117363	0.396648	0.0880109	0.103833	0.176602		-0.00249452	0.00869864	0.774287	-0.0131205	0.00737252	0.075134	ERG
2	q35	rs1250258	215800185:216800185	AED	0.769507	0.000550094	0.00187733	0.000270843	-0.00587639	0.00161361	0.00114457		0.599898	0.0161587	0.0308001	0.022554	-0.0674066	0.0295525	0.0136862		0.000607868	0.00187385	0.745639	-0.00605929	0.00161121	0.000169435	FN1	ATIC, FN1
4	q12	rs60991988	54301228:55301228	AED	0.792813	-0.000548441	0.00208802	0.118339	-0.00278993	0.00178636	0.281381		0.160995	0.0406908	0.0290259	0.0694629	0.0496565	0.0273541	0.194012		-0.000336132	0.00208264	0.87178	-0.00256721	0.00178256	0.149817	FIP1L1
11	p15.4	rs10840457	10175738:11175738	AED	0.860334	-0.000303313	0.00172387	5.01102e-05	0.00598609	0.00147615	0.0055843		0.0223616	0.0740958	0.0324379	0.515216	0.0201163	0.0309033	0.0346827		-9.37827e-05	0.00172144	0.956553	0.00601826	0.00147447	4.47183e-05	MRVI1	AMPD3, RNF141, MRVI1
2	p24.1	rs1344653	19230845:20230845	AED	0.885969	0.000290192	0.00202356	0.0100746	-0.00446343	0.00173453	0.0258637		0.0884459	-0.0536466	0.0314874	0.00120494	0.0937453	0.0289547	0.000284868		6.83444e-05	0.00201939	0.973002	-0.00411226	0.00173143	0.0175456	AC010096.2, AC019055.1
7	p12.3	rs10260816	45510100:46510100	AED	0.917285	-0.000164507	0.00158402	0.000323455	-0.00488855	0.00135951	0.0010418		0.792203	-0.011063	0.0419927	0.0278197	-0.0884728	0.0402184	0.0141246		-0.000179992	0.00158289	0.909467	-0.00498395	0.00135873	0.000244376	AC073115.6	IGFBP3
5	q12.1	rs13163533	61092576:62092576	CED	0.919021	0.000187405	0.00184332	1.0427e-05	0.00694976	0.00157654	0.00530404		0.460114	-0.0254522	0.0344569	0.182197	-0.043628	0.0327033	0.14878		0.000114237	0.00184069	0.950513	0.00683249	0.00157471	1.43207e-05	RN7SKP157, KIF2A
11	q24.3	rs7936928	129779168:130779168	AED	0.935578	0.00013362	0.00165313	0.00709641	-0.00380246	0.00141234	0.0179449		0.00679798	0.0891732	0.0329483	0.166401	-0.044	0.0317971	0.000488177		0.000357203	0.00165105	0.828716	-0.00388161	0.00141095	0.00594022	ADAMTS8	AP002986.1
1	p36.21	rs77194816	15509119:16509119	CED	0.968757	-7.11664e-05	0.00181699	6.53305e-05	-0.006233	0.00156107	0.00958698		0.143157	0.0434138	0.0296503	0.0278776	0.0616688	0.0280495	0.00090035		9.1523e-05	0.00181359	0.959752	-0.00602333	0.00155866	0.000111347	DDI2, RP4-680D5.9	PLEKHM2, AGMAT, CASP9
6	q25.1	rs67737839	151896945:152896945	AED	0.969185	-0.000184556	0.0047774	0.00945694	0.0107068	0.00412579	0.0289239		0.00135694	-0.316014	0.0986422	0.303259	-0.0880304	0.0855115	0.0257212		-0.00092364	0.00477181	0.846519	0.0104775	0.004121	0.0110074	ESR1
2	q22.3	rs11674165	145225530:146225530	CED	0.975422	5.28718e-05	0.00171609	3.23735e-06	-0.00686043	0.00147368	0.00224115		0.98001	0.000729734	0.0291792	0.0343483	-0.0587802	0.0277796	0.0121499		5.52049e-05	0.00171313	0.974293	-0.00700613	0.00147161	1.9277e-06	TEX41
13	q34	rs9521634	110333899:111333899	AED	0.996735	-6.62794e-06	0.00161967	0.0583834	-0.00262874	0.0013888	0.00893368		0.648724	0.0132123	0.0290128	0.000228285	-0.102755	0.0278812	0.00197563		3.44415e-05	0.00161715	0.983008	-0.00287655	0.00138708	0.038096	COL4A1	COL4A1
