# Supplementary material for: Identifying sex-specific genetic effects across 733 traits in UK Biobank
Source: Research Square preprint supplement (doi:10.21203/rs.3.rs-701876/v1), 2021-07-20
Supplement: Supplementary file 5 [file C. Creatinine.xlsx]

## Sheet: 30510_irnt
CHR	Band	locus	Range	Type	p_male	beta_male	se_male	p_female	beta_female	se_female	Min P_diff	Type (Rep)	p_male (Rep)	beta_male (Rep)	se_male (Rep)	p_female (Rep)	beta_female (Rep)	se_female (Rep)	Min p_diff (Rep)	Type (Final)	beta_male (Meta)	se_male (Meta)	p_male (Meta)	beta_female (Meta)	se_female (Meta)	p_female (Meta)	Genes	QTL Genes
15	q24.1	rs2472297	74527880:75527880	CED	3.43398e-12	-0.0274954	0.00395092	2.55586e-17	-0.031064	0.00366923	0.00284659	CED	4.46843e-05	-0.0323682	0.00792878	5.96749e-06	-0.0346359	0.00764905	0.000115503		-0.0284647	0.00353621	8.31443e-16	-0.0317322	0.00330829	8.66225e-22	CYP1A1, CYP1A2	FAM219B, UBL7, SCAMP2, CSK, ULK3, MPI, SEMA7A, CCDC33, SCAMP5, STRA6, MAN2C1, SNUPN
15	q21.1	rs60476496	45213801:46213801	SSE	5.46965e-10	0.024832	0.00400169	0.00292602	0.0111379	0.00374326	0.000578975		0.0444879	0.0292169	0.0145391	0.00416922	0.0392702	0.0137058	0.0118007		0.0251408	0.00385822	7.21273e-11	0.0130907	0.00361101	0.00028872	SPATA5L1, C15orf48	AC051619.1, AC051619.3, AC051619.5, SLC28A2, BLOC1S6, SPATA5L1, GATM, SLC30A4
7	p21.1	rs4410790	16784577:17784577	CED	6.63988e-09	-0.021079	0.00363424	1.33255e-13	-0.0250018	0.00337705	0.137493	AED	0.213646	0.0137484	0.0110551	0.000438656	0.0368857	0.010491	0.00296865		-0.0176823	0.00345247	3.02894e-07	-0.0191911	0.00321461	2.37277e-09	AC098592.8, AC003075.4
2	q33.2	rs12693968	202802627:203802627	CED	1.08685e-08	-0.0228696	0.00400037	0.0270635	-0.00824236	0.00372853	0.00303865		0.00938397	0.0195016	0.0075067	0.454704	-0.00535507	0.007163	0.00829619		-0.013498	0.00353036	0.000131616	-0.00762683	0.0033073	0.0211074	BMPR2	NOP58, FAM117B, BMPR2, AC064836.3
6	p22.1	rs9260426	29419109:30419109	CED	2.43103e-08	0.0194988	0.00349541	0.0277268	0.00717248	0.00325852	0.00110852		0.000710523	0.0255739	0.00755324	0.671325	0.00306839	0.00723109	0.000606946		0.0205703	0.0031722	8.89907e-11	0.00647975	0.00297082	0.0291734	HLA-A, HLA-W	TSSC4, AL645929.1, HLA-U, HLA-J, TPD52L2, ZNRD1ASP, HLA-H, HLA-G, HCG4, IFITM4P, HLA-A, BTN3A2, KIT, KRTCAP2, TRIM10, ZNRD1, ZFP57, HLA-W, HLA-K, FLOT1, HCG9, HLA-F-AS1, TRIM26, HLA-F, MICD, TNNT3, VARS2, DDX39BP2, PPP1R11, HCG4P6
1	p31.1	rs2803159	77442592:78442592	CED	2.88405e-08	-0.0193892	0.00349442	6.32931e-05	-0.0130243	0.00325586	0.114032		0.0020675	0.0333861	0.0108375	0.230041	0.0124189	0.0103467	0.000606946		-0.0144191	0.00332581	1.45422e-05	-0.0107319	0.00310572	0.000549235	AK5	AK5
7	p21.1	rs1357990	16674023:17674023	SSE	3.24704e-08	0.0209469	0.00378936	0.102379	0.00574647	0.00351803	0.00328484		0.617744	0.00403552	0.00808633	0.000286792	0.027916	0.00769617	0.000183743		0.0179019	0.00343129	1.81607e-07	0.00957822	0.00319959	0.00275731	AC098592.8, AC003075.4	AHR
18	q21.2	rs784257	52897199:53897199	CED	8.12851e-08	0.0241512	0.00450205	1.75461e-11	0.0281864	0.00419096	0.179867	AED	0.806322	0.0020814	0.00848943	9.98241e-06	-0.0357	0.00808039	0.000632921		0.0193069	0.00397738	1.20891e-06	0.0146436	0.00372033	8.2812e-05	RP11-397A16.1
2	q34	rs1047891	211040507:212040507	CED	3.95362e-06	0.0173706	0.00376478	7.35901e-11	0.0227743	0.00349646	0.0409551	CED	0.0515589	0.0174044	0.00893967	5.34205e-06	0.0385951	0.00847966	0.0129846		0.0173757	0.00346966	5.5027e-07	0.0250733	0.00323245	8.714e-15	CPS1	PHGDH, AARS, PSAT1
15	q24.2	rs9673084	75122943:76122943	CED	0.00106908	-0.0128493	0.00392735	8.17966e-09	-0.0211393	0.00366684	0.0166966	SSE_Female	0.000164431	-0.0297219	0.00788665	0.0156152	-0.0182717	0.00755689	0.0119192		-0.016202	0.00351557	4.0534e-06	-0.0205928	0.00329898	4.31529e-10	ANP32BP1, COMMD4	SCAMP2, CSK, IMP3, ULK3, COMMD4, NEIL1, SNX33, MPI, MAN2C1, SNUPN
1	p34.2	rs61780440	40990761:41990761	SSE	0.00254338	0.0134891	0.0044693	4.88965e-08	0.0227127	0.00416326	0.00560861		0.704458	0.00277101	0.00730533	0.0667053	0.0127967	0.00697861	0.0573275		0.0105701	0.00381243	0.0055623	0.0201099	0.00357536	1.85951e-08	SLFNL1, SCMH1	AC093151.3, CTPS1, CITED4, SLFNL1, SCMH1
6	q16.1	rs1806415	98091836:99091836	CED	0.166786	0.00528394	0.00382172	4.4423e-08	0.0194804	0.00355967	0.00656357		0.664815	0.00306744	0.0070796	0.00183405	0.0210347	0.00675041	0.0050254		0.00478378	0.003363	0.154889	0.0198186	0.0031487	3.0899e-10	RP11-436D23.1
8	p23.1	rs10103228	11360251:12360251	SSE	0.266576	-0.00398624	0.00358802	4.55688e-08	-0.0183586	0.00335745	0.00014748		0.535989	-0.00458659	0.00741091	0.000539485	-0.0243846	0.00704631	0.00914426		-0.00410024	0.00322943	0.20421	-0.0194736	0.00303096	1.31974e-10	RP11-481A20.4, RP11-481A20.10	AF131215.5, DEFB131E, FAM86B3P, FAM66D, FDFT1, NEIL2, FAM66A, CLDN23, AC107918.3, AF131215.2, FAM167A, BLK, DEFB134, MSRA, AC087203.2
15	q24.1	rs4480762	74639426:75639426	CED	0.728477	-0.00136248	0.00392473	2.52873e-07	-0.0188348	0.00365317	0.00111943		0.000691732	0.026558	0.00782692	0.0263183	0.0164507	0.00740501	0.000606946		0.00424735	0.00350836	0.226035	-0.0119279	0.00327618	0.000271781	SCAMP2	COX5A, FAM219B, SCAMP2, CSK, ULK3, MPI, PPCDC, CCDC33, SCAMP5, RPP25
