# Supplementary material for: Identifying sex-specific genetic effects across 733 traits in UK Biobank
Source: Research Square preprint supplement (doi:10.21203/rs.3.rs-701876/v1), 2021-07-20
Supplement: Supplementary file 6 [file D. Snoring.xlsx]

## Sheet: 1210
CHR	Band	locus	Range	Type	p_male	beta_male	se_male	p_female	beta_female	se_female	Min P_diff	Type (Rep)	p_male (Rep)	beta_male (Rep)	se_male (Rep)	p_female (Rep)	beta_female (Rep)	se_female (Rep)	Min p_diff (Rep)	Type (Final)	beta_male (Meta)	se_male (Meta)	p_male (Meta)	beta_female (Meta)	se_female (Meta)	p_female (Meta)	Genes	QTL Genes
2	q24.1	rs72906130	156576893:157576893	CED	8.36283e-09	-0.0149991	0.00260343	2.06096e-05	-0.00933976	0.00219331	0.013314		0.240553	0.0275957	0.0235118	0.00217525	0.0699737	0.0228305	0.0466716		-0.0144832	0.00258762	2.17949e-08	-0.00861444	0.00218326	7.95728e-05	AC073551.1, NR4A2	GPD2
13	q14.3	rs592333	50840315:51840315	CED	1.48537e-05	-0.00774712	0.00178877	1.23133e-11	-0.0102556	0.0015133	0.0105023		0.00238056	-0.0626448	0.0206196	0.624781	-0.010019	0.0204854	0.00747181		-0.00815718	0.00178208	4.70915e-06	-0.0102543	0.00150919	1.08619e-11	DLEU7	DLEU1
14	q32.2	rs1405238	99233954:100233954	CED	0.000494917	0.00627887	0.00180243	1.05708e-07	0.00812911	0.00152893	0.0800262		0.199539	-0.020857	0.0162586	0.0122248	-0.04042	0.0161322	0.00123202		0.00594942	0.00179146	0.000896961	0.00769691	0.00152211	4.2649e-07	BCL11B	BCL11B
13	q14.2	rs2066623	50253772:51253772	CED	0.00114209	-0.0062405	0.00191837	3.67206e-09	-0.00953431	0.00161636	0.18917		0.024935	0.0359654	0.0160416	0.49279	-0.0110296	0.0160811	0.0192743		-0.00564542	0.0019048	0.00303877	-0.00954927	0.00160826	2.89134e-09	DLEU1	DLEU7, DLEU1, DLEU2
6	q16.3	rs12524611	100313576:101313576	CED	0.00749069	-0.00567145	0.00212077	5.49484e-08	-0.0097551	0.00179495	0.000993704		0.0283577	-0.448634	0.204641	0.17496	0.266295	0.19632	0.00123202		-0.00571902	0.00212066	0.0070006	-0.00973203	0.00179487	5.88966e-08	RP3-344J20.1, SIM1
8	q13.3	rs34366597	71344893:72344893	SSE	0.0139382	-0.00441683	0.00179628	1.26207e-10	-0.00975885	0.00151722	0.0144857		0.307278	-0.0191441	0.0187495	0.0404583	-0.0386099	0.018843	0.053492		-0.00455077	0.00178809	0.0109264	-0.0099447	0.00151233	4.84038e-11	XKR9, RP11-326E22.1	AC022858.1, AC015687.1, TRAM1, XKR9, LACTB2, LACTB2-AS1
17	q21.31	rs1563304	44374453:45374453	CED	0.0454539	-0.00464629	0.00232263	8.10261e-09	-0.011291	0.001958	0.0287188		0.627744	0.00871194	0.0179643	0.00241885	0.0540904	0.0178298	0.0364962		-0.00442666	0.00230346	0.0546377	-0.0105119	0.0019463	6.62787e-08	WNT3	LRRC37A, DND1, NSF, KANSL1, KANSL1-AS1, LRRC37A3, LINC02210, MAPT, MAPK8IP1P1, NSFP1, LRRC37A2, LRRC37A4P, PLEKHM1P1, AC005829.2, MAPK8IP1
17	q21.31	rs12938031	43354502:44354502	CED	0.0956759	-0.00302877	0.00181777	1.74072e-08	-0.00865799	0.00153613	0.00870506	CED	0.724065	-0.0058712	0.0166284	4.09299e-05	-0.0685637	0.0167137	0.00123202		-0.00306234	0.00180701	0.0901318	-0.00915978	0.00152968	2.12402e-09	RP11-105N13.4	MAPK8IP1P1, LRRC37A2, RPS26P8, MAPK8IP1P2, LRRC37A, AC091132.3, MAPT, AC005829.1, KANSL1, AC005829.2, DND1P1, FAM215B, DND1, KANSL1-AS1, CRHR1, LINC02210, BPTF, PLEKHM1, LRRC37A4P, ARL17A, ARHGAP27, AC091132.1, LRRC37B, LRRC37A3, AC103810.2, NSFP1, PLEKHM1P1, MAPK8IP1
