# Supplementary material for: Identifying sex-specific genetic effects across 733 traits in UK Biobank
Source: Research Square preprint supplement (doi:10.21203/rs.3.rs-701876/v1), 2021-07-20
Supplement: Supplementary file 7 [file E. BW.xlsx]

## Sheet: 20022_irnt
CHR	Band	locus	Range	Type	p_male	beta_male	se_male	p_female	beta_female	se_female	Min P_diff	Type (Rep)	p_male (Rep)	beta_male (Rep)	se_male (Rep)	p_female (Rep)	beta_female (Rep)	se_female (Rep)	Min p_diff (Rep)	Type (Final)	beta_male (Meta)	se_male (Meta)	p_male (Meta)	beta_female (Meta)	se_female (Meta)	p_female (Meta)	Genes	QTL Genes
7	p13	rs138715366	43746271:44746271	CED	1.15146e-17	-0.230356	0.0269118	2.0445e-30	-0.248003	0.021631	0.0971212	SSE_Female	0.0352202	-0.129302	0.0613969	1.26753e-10	-0.29956	0.046562	0.0135685		-0.21407	0.024648	3.78463e-18	-0.257155	0.0196174	2.9441e-39	YKT6
3	q25.31	rs13322435	156295468:157295468	CED	1.48859e-16	-0.0420586	0.00509234	6.25245e-38	-0.0529973	0.00411503	0.0891543	CED	3.81981e-05	-0.0469782	0.0114045	2.39531e-11	-0.0572169	0.00856218	0.0150474		-0.0428764	0.00464985	2.94254e-20	-0.0537891	0.00370892	1.16595e-47	LEKR1, LINC00880	TIPARP, AC092944.1
12	q14.3	rs7306710	65876091:66876091	CED	9.638e-15	-0.038853	0.00501626	4.09893e-26	-0.0427622	0.00404465	0.0296379	CED	0.0206747	0.0263091	0.011369	5.54654e-05	0.0340761	0.00845143	0.0525248		-0.0282346	0.00458939	7.64417e-10	-0.0284431	0.00364837	6.38407e-15	HMGA2, RP11-366L20.4	HMGA2
17	p13.1	rs367181	6660524:7660524	CED	1.54769e-11	0.0339124	0.00502829	7.79186e-17	0.0336642	0.00403863	0.255568	CED	2.6863e-05	0.0671286	0.0159839	0.0107444	0.0303847	0.0119105	0.0198957		0.0369036	0.00479655	1.42851e-14	0.033326	0.00382473	2.9518e-18	ELP5	ACAP1, CLDN7, EIF5A, DLG4, ELP5, SLC2A4, ACADVL, ZHX2, CTDNEP1, GRAMD1C, DVL2
6	p21.31	rs75104038	33690104:34690104	CED	6.33689e-11	0.0678439	0.0103793	6.92844e-08	0.0449973	0.00834312	0.0143189		0.018093	0.132769	0.0561642	0.246353	-0.0472954	0.0407972	0.00474438		0.069988	0.0102065	7.02162e-12	0.0412925	0.00817395	4.37863e-07	CYCSP55, HMGA1
9	q34.3	rs28378473	138745460:139745460	CED	9.56424e-11	-0.0365663	0.00564771	1.21107e-08	-0.0259876	0.0045604	0.0149992	CED	0.373945	0.0114242	0.0128487	0.000509007	0.0331566	0.00953761	0.00173137		-0.0287955	0.00517028	2.55578e-08	-0.0149819	0.00411427	0.000271119	GPSM1	CARD9, DNLZ, ENTR1, GPSM1, INPP5E, SNAPC4, SEC16A
9	q22.32	rs28457693	97717348:98717348	CED	1.00955e-10	0.0517231	0.00799879	1.75586e-11	0.043831	0.00651701	0.0280134	SSE_Female	0.781565	0.00332248	0.0119822	9.48689e-06	0.0401284	0.0090595	0.00713876		0.0368031	0.00665266	3.16447e-08	0.0425684	0.00529039	8.5295e-16	PTCH1	PTCH1, FANCC
7	p22.3	rs798528	2272431:3272431	CED	1.53964e-10	-0.0345519	0.00539686	4.43609e-05	-0.0177626	0.00434969	0.00828819	CED	0.0180053	-0.0293522	0.0124071	4.16447e-05	-0.0372622	0.00909089	0.0853723		-0.0337246	0.00494894	9.45841e-12	-0.0213951	0.00392369	4.95845e-08	GNA12	GNA12, AC006028.1, PFDN4, AMZ1
4	p15.31	rs4144829	17403654:18403654	CED	2.69996e-10	-0.0357218	0.00565586	1.80129e-11	-0.0305895	0.00455072	0.0045213	AED	0.012287	0.0322155	0.0128652	0.00500465	0.0267445	0.00952788	0.168587		-0.0247182	0.00517761	1.80548e-06	-0.0199398	0.00410638	1.199e-06	LCORL	LAP3, DCAF16
6	p12.1	rs7744700	52849401:53849401	CED	4.16297e-10	-0.0348259	0.00557343	1.8622e-08	-0.0252291	0.0044854	0.0801464	CED	0.0443285	-0.0251052	0.0124831	0.00125365	-0.0298253	0.00924318	0.0393665		-0.0332102	0.00508922	6.77269e-11	-0.0261051	0.00403536	9.85952e-11	AL591034.1, GCLC
5	q11.2	rs7722058	56573666:57573666	SSE	1.00041e-09	-0.0419915	0.00687251	5.02985e-05	-0.0224669	0.0055414	0.000384509	CED	0.000503628	-0.0523395	0.0150421	0.120881	-0.0172723	0.0111352	0.0227093		-0.0437785	0.00625098	2.49704e-12	-0.0214358	0.00496104	1.55445e-05	RP11-772C9.1, AC116606.1
11	p15.5	rs1011476	1799035:2799035	CED	1.53059e-09	0.0334474	0.005536	0.000111522	0.0172995	0.00447689	0.00669127		0.579214	0.00689582	0.0124351	0.000212507	0.0345047	0.00931508	0.0237793		0.0290555	0.00505746	9.18816e-09	0.0205279	0.00403506	3.63046e-07	ASCL2, C11orf21	TSPAN32, ASCL2
9	q33.3	rs9886870	125408280:126408280	CED	2.54342e-09	0.0423718	0.00711018	2.2592e-05	0.0243821	0.00575352	0.00343988		0.839989	0.00669738	0.0331701	1.51309e-06	0.117913	0.0245112	0.00217947		0.0408046	0.00695225	4.37722e-09	0.0292664	0.00560128	1.74206e-07	STRBP	ZBTB6, RC3H2, RABGAP1, ZBTB26, STRBP
10	q26.13	rs2901307	123628443:124628443	CED	3.33294e-09	0.0294587	0.00498038	0.000108972	0.0155821	0.00402657	0.00234495		0.324815	-0.0116944	0.0118768	0.00355341	-0.0256125	0.00878476	0.0359772		0.0233044	0.00459291	3.89549e-07	0.00843002	0.00366038	0.0212763	RNU6-728P, PLEKHA1	PLEKHA1, HTRA1
7	p15.3	rs12534093	23002974:24002974	CED	5.15839e-09	-0.0338526	0.00579408	4.27533e-12	-0.0322254	0.00465117	0.0297451		0.00819955	-0.0303061	0.0114619	0.52863	-0.00541947	0.00860087	0.0063917		-0.0331308	0.00517094	1.48304e-10	-0.02616	0.00409126	1.61471e-10	IGF2BP3	IGF2BP3, CCDC126
3	q21.1	rs11708067	122565778:123565778	CED	7.90865e-09	0.0333351	0.00577631	1.18421e-17	0.0397991	0.00465174	0.103439	CED	5.9698e-05	0.0521365	0.0129852	2.90559e-08	0.05427	0.00978069	0.0235473		0.0364409	0.00527769	5.0303e-12	0.0424686	0.00420083	5.01015e-24	ADCY5	ADCY5
10	q25.3	rs1801253	115305056:116305056	AED	1.69654e-08	0.0320938	0.00568941	4.28635e-09	0.0269397	0.00458692	0.0152165	AED	0.00125586	-0.0415782	0.0128867	0.0116097	-0.0240435	0.00952606	0.0421216		0.0200763	0.00520473	0.000114642	0.0173439	0.00413277	2.70876e-05	ADRB1	VWA2, ADRB1
6	q24.1	rs6570464	141327882:142327882	CED	1.7675e-08	0.0324975	0.00576819	1.0894e-06	0.022706	0.00465763	0.0704957		0.446988	-0.00868508	0.0114208	0.0269711	-0.0188547	0.00852357	0.0132978		0.0241275	0.00514876	2.78495e-06	0.0131496	0.00408722	0.00129427	RN7SKP106, RPS3AP23
1	q21.3	rs141845046	154487704:155487704	CED	1.81207e-08	0.0728145	0.0129342	1.46749e-09	0.0634888	0.0104969	0.0299531		0.158904	0.0420299	0.0298332	0.0102859	0.05588	0.021775	0.0732063		0.0679436	0.0118669	1.03149e-08	0.0620541	0.00945558	5.28447e-11	ZBTB7B	THBS3, ZBTB7B
6	p21.31	rs57026767	33719698:34719698	CED	1.8366e-08	-0.0381638	0.00678191	3.9833e-06	-0.0253217	0.00548986	0.0129978		0.67369	0.00680143	0.0161517	0.00016328	0.0454313	0.0120492	0.0135723		-0.0314244	0.00625305	5.02265e-07	-0.013159	0.00499576	0.00843792	C6orf1, RPL35P2	UHRF1BP1, SMIM29, HMGA1
4	p15.31	rs7671110	17374089:18374089	CED	3.64482e-08	-0.0378217	0.00686695	4.30937e-07	-0.0280615	0.00555121	0.0667626		0.0410278	-0.0312608	0.0152983	0.000329569	-0.0409567	0.0114043	0.0659083		-0.0367215	0.00626477	4.58467e-09	-0.0305316	0.0049913	9.53706e-10	LCORL	LAP3, MED28, LCORL, DCAF16
20	q11.21	rs6057618	30764083:31764083	CED	4.31192e-08	-0.0326178	0.00595422	6.6346e-11	-0.0313899	0.00480757	0.0204068	AED	0.182445	0.0183656	0.0137743	0.000967532	0.0335699	0.0101721	0.0014463		-0.024591	0.00546545	6.81571e-06	-0.019529	0.00434657	7.02322e-06	C20orf203, BAK1P1	DNMT3B, EFCAB8, MAPRE1, ASXL1, COMMD7
12	q24.12	rs7310615	111365049:112365049	CED	4.49777e-08	0.0274286	0.0050138	1.17089e-13	0.0299128	0.0040309	0.0800115	CED	0.146576	-0.016356	0.011266	0.00056811	-0.0292016	0.00847203	0.0255211		0.0201903	0.00458066	1.04462e-05	0.0190009	0.00363991	1.78759e-07	SH2B3	PRKCA, ICAM1, TRABD2A, KLF6, COCH, TSPAN2, TUBB6, GBP5, PTPN4, RNF165, VIM, DUSP18, SPIB, TNFRSF13C, GLB1L2, WARS, LGALS3BP, IDO1, TRIM22, GBP6, MAL, TRAK1, TP53INP2, APOL3, DHRS3, FCGR1CP, UBE2L6, MYADM, PLPP5, RRP12, VPREB3, AHNAK, ANKRD28, LIMK1, GGT5, PRSS23, SYNJ2, PNOC, ANKRD22, VAMP5, GNG7, PPP1R15A, POU2AF1, SFMBT1, SRBD1, EMP1, DPP4, FAM241B, OXNAD1, FUZ, APOL2, EZR, FBXO6, TCTN1, RAB11F…
11	p15.5	rs11042596	1618860:2618860	CED	9.01516e-08	-0.0284503	0.00532177	1.79401e-09	-0.0258371	0.00429481	0.106675	CED	0.0419108	0.0436994	0.0214785	0.00247186	0.0489569	0.0161731	0.0335515		-0.0242772	0.00516557	2.60416e-06	-0.0209102	0.00415094	4.71762e-07	H19, IGF2	IGF2, INS-IGF2
2	p25.1	rs71437665	9127978:10127978	CED	1.05732e-07	0.0285966	0.00537826	9.87216e-12	0.0297588	0.00437051	0.00796411		0.0362489	0.0241966	0.0115535	0.000389419	0.0306122	0.00862898	0.00998717		0.0278129	0.00487585	1.16873e-08	0.029933	0.00389893	1.62539e-14	IAH1	ITGB1BP1, IAH1, ADAM17
10	q22.1	rs10823318	70479924:71479924	CED	1.90407e-07	0.027955	0.00536675	4.27757e-14	0.0327979	0.00434228	0.109033	AED	0.426168	-0.00964621	0.0121216	1.4733e-06	-0.043843	0.00910377	0.00352568		0.0217924	0.00490729	8.96192e-06	0.0185933	0.00391928	2.09482e-06	RP11-227H15.4	HK1, SUPV3L1, SRGN, VPS26A, HKDC1, STOX1
6	p21.31	rs12205495	34984850:35984850	CED	2.02778e-07	0.0315632	0.00607308	9.5042e-09	0.0280681	0.00489014	0.105317		0.152086	-0.0161506	0.0112762	2.36558e-06	-0.0398742	0.00844714	0.0409717		0.020835	0.00534692	9.75351e-05	0.0110137	0.00423212	0.00925747	TULP1, RP3-340B19.3	SRPK1, UHRF1BP1, TULP1, RPL10A, FKBP5
12	q14.3	rs1480470	65912130:66912130	CED	2.84863e-07	0.026642	0.0051897	3.84179e-14	0.0316214	0.00417879	0.136879		9.80302e-06	-0.0517371	0.0116975	0.163787	-0.0122382	0.00878871	0.000552292		0.0137516	0.00474379	0.00374508	0.0235342	0.00377392	4.48862e-10	HMGA2, RP11-366L20.4
6	q25.1	rs7772579	151542502:152542502	CED	2.87966e-07	-0.0285599	0.0055655	9.50849e-13	-0.0319393	0.00447443	0.278504	CED	0.00721965	-0.0335824	0.0124987	1.40409e-06	-0.0453474	0.00939741	0.0256762		-0.029391	0.00508423	7.43403e-09	-0.0344172	0.00403987	1.60412e-17	ESR1	ESR1
4	q28.3	rs181428649	134290504:135290504	CED	6.59245e-07	0.105547	0.0212223	1.63576e-08	0.0952746	0.0168716	0.329425		0.0537373	0.0980085	0.0508056	0.00128528	0.116148	0.0360753	0.0125787		0.104427	0.0195825	9.678e-08	0.0990207	0.0152828	9.22034e-11	RP11-285A15.1, RP11-427M20.1
12	p13.32	rs76895963	3884844:4884844	CED	1.1624e-06	0.0919752	0.0189159	2.22887e-11	0.103778	0.0155105	0.106401	SSE_Female	0.0991948	0.0779522	0.0472762	0.000365058	0.126116	0.03538	0.0393665		0.09004	0.0175623	2.94552e-07	0.107379	0.0142054	4.06032e-14	CCND2	CCND2
11	p15.5	rs3213229	1655876:2655876	CED	1.18889e-06	0.0464415	0.0095601	2.37619e-09	0.0462623	0.00774889	0.291496	SSE_Female	0.00482603	0.0883391	0.0313391	9.29028e-06	0.105506	0.0237952	0.0407964		0.0500085	0.0091441	4.52755e-08	0.0519426	0.00736805	1.79301e-12	INS-IGF2	INS-IGF2, INS, TH
15	q26.2	rs55958435	96352638:97352638	CED	3.99299e-06	-0.0265058	0.00574706	2.48644e-10	-0.0294151	0.00464815	0.128032		0.00274856	-0.0342974	0.0114515	0.597921	0.0044624	0.00846115	0.00115708		-0.0280734	0.0051365	4.61667e-08	-0.0215614	0.0040739	1.20602e-07	NR2F2-AS1
7	p13	rs117025997	43136696:44136696	CED	5.35424e-06	-0.141559	0.0311069	2.19047e-10	-0.157277	0.0247763	0.692665	CED	0.029692	-0.160102	0.0736316	0.000467289	-0.18564	0.0530511	0.369033		-0.144367	0.0286547	4.70003e-07	-0.162356	0.0224488	4.74967e-13	STK17A
6	q21	rs12206634	108853407:109853407	CED	7.29105e-06	0.0342259	0.00763067	1.06751e-12	0.0439148	0.00616587	0.0951885	CED	0.000829205	0.13906	0.0415912	0.439164	0.0239368	0.0309414	0.0131816		0.0376398	0.0075054	5.3026e-07	0.0431518	0.00604697	9.60221e-13	SESN1	ARMC2, SESN1
15	q26.3	rs2871865	98694896:99694896	CED	9.74086e-06	-0.0345526	0.00781181	4.09033e-09	-0.0369215	0.00627818	0.15834		0.994586	0.000106044	0.0156265	0.00402834	-0.0332672	0.0115664	0.0180186		-0.0276229	0.00698735	7.70893e-05	-0.0360899	0.00551774	6.12348e-11	IGF1R	IGF1R
10	q24.32	rs11598702	104397985:105397985	CED	1.18036e-05	-0.022277	0.00508439	9.08635e-11	-0.0266037	0.00410425	0.036432	CED	0.000151673	-0.0431202	0.0113797	0.00219617	-0.0260099	0.00849266	0.0125738		-0.0257454	0.00464212	2.92182e-08	-0.0264913	0.00369535	7.56489e-13	NT5C2	INA, BORCS7, NT5C2, AS3MT, ATP5MD, PCGF6, SH3PXD2A, TRIM8, CALHM2, BORCS7-ASMT, WBP1L, ACTR1A, CNNM2
17	q11.1	rs8069093	25114229:26114229	CED	1.60592e-05	0.0218208	0.00505825	2.79853e-08	0.0226555	0.00407916	0.103302	CED	0.0540513	0.0217606	0.011295	0.00211004	0.0257668	0.00838056	0.154567		0.0218107	0.00461647	2.30622e-06	0.0232514	0.00366776	2.3064e-10	RP11-173M1.3, MIR4522	LGALS9, SYPL1P2, WSB1
15	q26.3	rs7402983	98693276:99693276	CED	1.72479e-05	-0.021789	0.00506947	5.6529e-10	-0.0253391	0.00408675	0.188803		0.129775	0.0174046	0.0114877	0.000214886	0.0317324	0.00857316	0.0562394		-0.0154005	0.00463794	0.000898433	-0.0147718	0.00368905	6.2223e-05	IGF1R	IGF1R
6	p22.3	rs10440833	20188121:21188121	CED	1.75074e-05	-0.024297	0.00565733	9.82623e-20	-0.0414778	0.00456181	0.00332978	AED	0.355356	-0.011747	0.0127094	1.15173e-06	-0.0459822	0.00945185	0.0112418		-0.0222216	0.00516842	1.71191e-05	-0.0423288	0.00410834	6.81989e-25	CDKAL1	CDKAL1
2	p21	rs1374205	45984188:46984188	CED	1.98053e-05	0.0217193	0.00508966	3.5405e-13	0.0298483	0.00410407	0.0893856		0.00792789	-0.0306853	0.0115555	0.000151295	-0.0325221	0.00858216	0.000801999		0.0132047	0.00465786	0.00458369	0.0182398	0.0037025	8.3774e-07	AC016696.1
4	q31.21	rs12507436	145112551:146112551	CED	2.8068e-05	0.0209022	0.00498998	3.53919e-12	0.0279623	0.00402037	0.00172673		0.000464735	-0.0522253	0.0149172	0.235508	-0.0132631	0.0111801	0.00734905		0.0135429	0.00473223	0.004212	0.0232418	0.0037832	8.0764e-10	HHIP
20	q12	rs6513673	38677184:39677184	CED	4.01428e-05	0.0210788	0.00513256	7.67363e-08	0.0222512	0.00413978	0.158216		0.0147685	0.0281222	0.0115336	0.000952065	0.0284277	0.0086022	0.0135148		0.0222431	0.00468921	2.10101e-06	0.0234127	0.00373029	3.46578e-10	SNORD112, MAFB
8	q22.3	rs10505073	105612262:106612262	CED	8.55729e-05	0.0255649	0.00650765	9.04267e-09	0.030203	0.00525437	0.0131448		0.00394088	0.0408381	0.0141638	0.121637	0.0163322	0.0105506	0.0427277		0.0282271	0.00591336	1.81101e-06	0.0274464	0.00470338	5.36375e-09	RP11-127H5.1
4	q24	rs1909122	105627004:106627004	CED	0.000145595	-0.0201207	0.0052968	3.4195e-12	-0.0296656	0.0042623	0.014107	CED	0.00179022	0.035518	0.0113712	0.0246334	0.018935	0.00842594	0.0225345		-0.0102008	0.00480145	0.0336269	-0.0197632	0.00380337	2.03373e-07	TET2	TET2
10	q23.33	rs34744311	93967287:94967287	CED	0.000364649	0.0183229	0.00514028	4.61696e-12	0.0286267	0.00413827	0.108873	CED	0.00311349	0.033766	0.01142	0.0420936	0.0173697	0.00854515	0.0760382		0.0209246	0.00468734	8.04181e-06	0.0264882	0.0037245	1.14484e-12	HHEX, Y_RNA	HHEX, EIF2S2P3, KIF11, EXOC6
2	p21	rs2881322	46158721:47158721	CED	0.000397033	0.0178937	0.00505158	1.22252e-07	0.0215684	0.0040769	0.0956336		0.46054	0.00844341	0.0114413	0.000576758	0.0292324	0.00849103	0.00505572		0.016352	0.00462119	0.000402438	0.0230042	0.00367522	3.86747e-10	TMEM247	ATP6V1E2
10	q23.33	rs11187838	95538686:96538686	CED	0.000511176	0.0174319	0.00501643	1.61186e-10	0.0258989	0.00404992	0.0323868	AED	0.023804	0.0255011	0.0112812	8.60225e-05	0.0331354	0.0084366	0.0445072		0.018764	0.00458369	4.24621e-05	0.0272542	0.00365104	8.34417e-14	PLCE1	NOC3L, HELLS
8	q24.13	rs13271368	126006140:127006140	AED	0.000565973	-0.0203822	0.00591207	3.93443e-10	-0.0297806	0.00475948	0.0531327		0.73832	-0.00490683	0.0146874	0.00784874	-0.0291629	0.0109688	0.0928828		-0.0182244	0.00548443	0.000890763	-0.0296827	0.00436617	1.05825e-11	RP11-136O12.2
3	q21.1	rs4677883	122552018:123552018	CED	0.00161972	0.0202297	0.00641716	7.49781e-10	0.0317637	0.00516005	0.108347	CED	0.00643133	-0.0365918	0.0134267	0.00119953	-0.0325886	0.0100602	0.150435		0.0096637	0.00578986	0.095103	0.0183599	0.00459132	6.36546e-05	ADCY5	PDIA5, ADCY5, SEC22A
14	q11.2	rs12889267	21042766:22042766	CED	0.00338	-0.0194916	0.00665023	2.70155e-08	-0.0297792	0.00535586	0.0580607		0.00212374	-0.0351055	0.0114244	0.387457	-0.00732342	0.0084737	0.0060288		-0.0234433	0.00574739	4.52397e-05	-0.023369	0.00452734	2.44644e-07	ARHGEF40	ZNF219, ARHGEF40
15	q22.2	rs339969	60383281:61383281	CED	0.00387464	0.0147589	0.00510994	5.46798e-09	0.0240426	0.00412206	0.0242392	CED	0.0121438	-0.029436	0.0117358	0.0895053	-0.0148517	0.00874617	0.0211564		0.0077155	0.00468509	0.0995951	0.0169735	0.0037287	5.31058e-06	RORA	ANXA2P2, ICE2, RORA
7	q11.23	rs12154791	72539529:73539529	CED	0.00805751	0.0259828	0.00980589	3.32989e-10	0.0496733	0.00790587	0.00383509	CED	0.542895	0.00754645	0.0124027	0.000245989	0.0339975	0.00927146	0.0106055		0.0188913	0.00769216	0.0140527	0.0430738	0.00601574	8.057e-13	MLXIPL, VPS37D	DNAJC30, FZD9, BUD23, BCL7B, TYW1B
12	p13.32	rs3217870	3900111:4900111	CED	0.0203399	-0.0117974	0.00508493	5.6904e-09	-0.0238861	0.00409991	0.0200806		0.00670353	0.0346561	0.0127808	0.893012	0.00127562	0.00948447	0.0179812		-0.00544914	0.00472472	0.248777	-0.0199246	0.00376335	1.19422e-07	CCND2	TIGAR
5	q31.1	rs1981627	133338180:134338180	CED	0.0219447	0.0116031	0.00506384	2.54374e-10	0.0258353	0.00408474	0.0126911		0.0042437	-0.0427032	0.0149319	0.0159664	0.026872	0.0111509	9.21565e-05		0.00600163	0.00479558	0.210755	0.025958	0.0038355	1.30745e-11	RNU6-456P, AC005355.2	JADE2
2	p21	rs4953353	46067276:47067276	CED	0.0284013	-0.0114203	0.0052106	1.85934e-08	-0.0236419	0.00420302	0.0210052		0.0118111	-0.0288608	0.0114617	0.746372	0.00276819	0.00855884	0.0135148		-0.0144074	0.00474344	0.00238685	-0.0185105	0.00377267	9.27314e-07	EPAS1	EPAS1
6	p21.33	rs3997996	30827170:31827170	CED	0.0350438	-0.0163691	0.00776565	1.82605e-08	-0.0352338	0.00626034	0.00348058		0.83027	-0.0038706	0.0180566	4.68571e-05	-0.0542205	0.0133173	0.00440634		-0.0144182	0.00713388	0.0432706	-0.0386702	0.00566556	8.76278e-12	XXbac-BPG248L24.12, DHFRP2	HLA-B, NOTCH4, MICA, TCF19
1		rs2367162	42951338:43951338	CED	0.0493523	-0.0165509	0.00842045	2.95139e-08	-0.0376738	0.00679463	0.0400453	SSE_Female	0.379224	-0.0143699	0.0163415	0.000226992	-0.0456421	0.0123778	0.0299519		-0.0160933	0.00748517	0.0315532	-0.0395189	0.00595623	3.24764e-11		SLC2A1-AS1
22	q13.2	rs41311445	41570374:42570374	SSE	0.0831668	-0.0146442	0.00845205	1.72569e-11	-0.0458047	0.00680792	0.00114245	AED	0.28202	-0.0213343	0.0198306	0.00113486	-0.0477923	0.0146822	0.0617178		-0.0156727	0.00777529	0.0438309	-0.0461564	0.00617626	7.82684e-14	NHP2L1	CENPM, CYP2D7, DESI1, CCDC134, RANGAP1, CYP2D6, L3MBTL2, MEI1, NDUFA6
4	q28.3	rs115629016	135063297:136063297	CED	0.0875805	0.0152895	0.00895002	1.12794e-09	0.0441825	0.00725418	0.0121442		0.0689127	0.0804569	0.0442287	0.0029086	0.0950468	0.0319216	0.00748668		0.017853	0.00877222	0.0418327	0.0466803	0.00707382	4.139e-11	RP11-400D2.3, CTD-2012I17.1
1	p31.3	rs3008870	66918027:67918027	SSE	0.0970229	-0.00927764	0.00559069	4.34332e-09	-0.0263794	0.00449319	0.000799535	CED	0.244083	0.0148506	0.0127485	0.0025228	0.0286317	0.00947794	0.0897892		-0.00538587	0.00512	0.292833	-0.0162848	0.00406006	6.04672e-05	MIER1	WDR78, MIER1, SLC35D1
2	q35	rs11575194	217043728:218043728	AED	0.142737	-0.0178296	0.0121646	4.24834e-08	-0.0533021	0.00972569	0.0227508		0.197258	-0.0438388	0.0339978	0.0147668	-0.0638204	0.0261751	0.0736511		-0.0207815	0.0114535	0.0696127	-0.0545781	0.00911671	2.14273e-09	IGFBP5	IGFBP5
2	q12.3	rs6732428	108818185:109818185	CED	0.21242	-0.0063557	0.005097	1.55248e-08	-0.0233459	0.0041276	0.00754652		1.86757e-05	-0.0484125	0.0113075	0.121851	-0.0130125	0.0084109	0.00157797		-0.013458	0.00464674	0.0037768	-0.0213403	0.00370545	8.45324e-09	AC010095.6, AC010095.7	LIMS1, GCC2, RGPD3, RANBP2
6	p22.3	rs9368207	20085473:21085473	SSE	0.787061	-0.00158509	0.00586788	2.41648e-08	-0.0264341	0.00473767	0.000984661		0.957632	-0.00153142	0.0288264	0.00715205	0.0561878	0.0208885	0.0263418		-0.00158295	0.00574996	0.783087	-0.0223918	0.00462032	1.25735e-06	CDKAL1
