# Supplementary material for: Identifying sex-specific genetic effects across 733 traits in UK Biobank
Source: Research Square preprint supplement (doi:10.21203/rs.3.rs-701876/v1), 2021-07-20
Supplement: Supplementary file 8 [file 3. Previous Findings.xlsx]

## Sheet: Fat
#gwasCatalog.chrom	gwasCatalog.chromStart	gwasCatalog.chromEnd	gwasCatalog.name	gwasCatalog.author	gwasCatalog.pubDate	gwasCatalog.title	gwasCatalog.trait	gwasCatalog.initSample	gwasCatalog.replSample	gwasCatalog.region	gwasCatalog.genes	gwasCatalog.pValueDesc
# region=chr1:154631674-155631673												Header
chr1	154656974	154656975	rs3856270	Han X	2020-01-03	Using Mendelian randomization to evaluate the causal relationship between serum C-reactive protein levels and age-related macular degeneration.	C-reactive protein levels	418,642 British ancestry individuals	NA	1q21.3	NR
chr1	154657904	154657905	rs12131108	Ahsan M	2017-09-15	The relative contribution of DNA methylation and genetic variants on protein biomarkers for human diseases.	Blood protein levels	up to 961 individuals	NA	1q21.3	NR	(IL6RA)
chr1	154669066	154669067	rs11264244	Kichaev G	2018-12-27	Leveraging Polygenic Functional Enrichment to Improve GWAS Power.	Sunburns	approximately 344,000 European ancestry individuals	NA	1q21.3
chr1	154673232	154673233	rs4845661	Folkersen L	2020-10-16	Genomic and drug target evaluation of 90 cardiovascular proteins in 30,931 individuals.	Interleukin-6 receptor subunit alpha levels	21,758 European ancestry individuals	9,173 individuals	1q21.3
chr1	154685540	154685541	rs16830122	Jun G	2015-03-17	A novel Alzheimer disease locus located near the gene encoding tau protein.	Alzheimer's disease in APOE e4- carriers	7,184 cases, 26,968 controls	718 European ancestry cases, 1,699 European ancestry controls	1q21.3	KCNN3
chr1	154714005	154714006	rs4999127	Nielsen JB	2018-07-30	Biobank-driven genomic discovery yields new insight into atrial fibrillation biology.	Atrial fibrillation	60,620 European ancestry cases, 970,216 European ancestry controls	NA	1q21.3	KCNN3
chr1	154714005	154714006	rs4999127	Roselli C	2018-06-11	Multi-ethnic genome-wide association study for atrial fibrillation.	Atrial fibrillation	55,114 European ancestry cases, 482,295 European ancestry controls, 8,180 Japanese ancestry cases, 28,612 Japanese ancestry controls, 1,307 African American ancestry cases, 7,660 African American ancestry controls, 845 Hispanic cases, 4,177 Hispanic controls	NA	1q21.3	KCNN3	(EA)
chr1	154742981	154742982	rs538633861	Tachmazidou I	2017-06-01	Whole-Genome Sequencing Coupled to Imputation Discovers Genetic Signals for Anthropometric Traits.	Height	1,249 whole genome sequenced European ancestry individuals, 3,541 whole genome sequenced individuals, 46,910 European ancestry individuals, 471 Carlantino (founder/genetic isolate) individuals, 1,197 Friuli Venezia Giulia (founder/genetic isolate) individuals, 1,043 Mylopotamos (founder/genetic isolate) individuals, 933 Pomak (founder/genetic isolate) individuals, 1,785 Val Borbera (founder/genet…	205,003 European ancestry individuals	1q21.3	KCNN3
chr1	154754193	154754194	rs6691316	Comuzzie AG	2012-12-04	Novel genetic loci identified for the pathophysiology of childhood obesity in the Hispanic population.	Obesity-related traits	815 Hispanic children from 263 families	NA	1q21.3	KCNN3	(ALT/AST)
chr1	154754193	154754194	rs6691316	Comuzzie AG	2012-12-04	Novel genetic loci identified for the pathophysiology of childhood obesity in the Hispanic population.	Obesity-related traits	815 Hispanic children from 263 families	NA	1q21.3	KCNN3	(AST/ALT)
chr1	154775243	154775244	rs61811867	Pollack S	2018-11-28	Multiethnic Genome-wide Association Study of Diabetic Retinopathy using Liability Threshold Modeling of Duration of Diabetes and Glycemic Control.	Proliferative diabetic retinopathy (vs no DR)	398 European ancestry cases, 1,970 European ancestry controls, 1,097 African American cases, 941 African American controls	1,354 East Asian ancestry cases, 1130 East Asian ancestry controls, 801 European ancestry cases, 2,880 European ancestry controls, 232 Hispanic cases, 1,048 Hispanic controls	1q21.3	NR	(AA)
chr1	154792268	154792269	rs2798603	Kichaev G	2018-12-27	Leveraging Polygenic Functional Enrichment to Improve GWAS Power.	Waist-hip ratio	approximately 458,000 European ancestry individuals	NA	1q21.3
chr1	154793762	154793763	rs951240	Zhu Z	2019-10-24	Shared Genetic and Experimental Links between Obesity-Related Traits and Asthma Subtypes in UK Biobank.	Waist-to-hip ratio adjusted for BMI	457,690 European ancestry individuals	NA	1q21.3	NR
chr1	154812399	154812400	rs34292822	Roselli C	2018-06-11	Multi-ethnic genome-wide association study for atrial fibrillation.	Atrial fibrillation	55,114 European ancestry cases, 482,295 European ancestry controls, 8,180 Japanese ancestry cases, 28,612 Japanese ancestry controls, 1,307 African American ancestry cases, 7,660 African American ancestry controls, 845 Hispanic cases, 4,177 Hispanic controls	NA	1q21.3	KCNN3	(EA)
chr1	154813618	154813619	rs6426985	Warrington NM	2019-05-01	Maternal and fetal genetic effects on birth weight and their relevance to cardio-metabolic risk factors.	Offspring birth weight	210,267 European ancestry individuals, 19,802 individuals	NR	1q21.3	DCST2, KCNN3
chr1	154813618	154813619	rs6426985	Warrington NM	2019-05-01	Maternal and fetal genetic effects on birth weight and their relevance to cardio-metabolic risk factors.	Birth weight	298,142 European ancestry individuals, 6,635 African American individuals, 1,449 Filipino individuals, 420 Turkish individuals, 365 Moroccan individuals, 395 Surinamese individuals, 1,052 Afro-Caribbean individuals, 612 Hispanic individuals, 1,180 Thai individuals, 840 Chinese ancestry individuals, 10,133 individuals	NR	1q21.3	DCST2, KCNN3
chr1	154814267	154814268	rs6666258	Ellinor PT	2012-04-29	Meta-analysis identifies six new susceptibility loci for atrial fibrillation.	Atrial fibrillation	6,707 European ancestry cases, 52,426 European ancestry controls	5,381 European ancestry casses, 10,030 European ancestry controls	1q21.3	KCNN3, PMVK
chr1	154814352	154814353	rs13376333	Ellinor PT	2010-02-21	Common variants in KCNN3 are associated with lone atrial fibrillation.	Atrial fibrillation	1,335 European ancestry cases, 12,844 European ancestry controls	1,164 European ancestry cases, 3,607 European ancestry controls	1q21.3	KCNN3
chr1	154818402	154818403	rs36004974	Christophersen IE	2017-04-17	Large-scale analyses of common and rare variants identify 12 new loci associated with atrial fibrillation.	Prevalent atrial fibrillation	8,656 European ancestry cases, 102,776 European ancestry controls.		1q21.3	KCNN3
chr1	154827090	154827091	rs146787591	Tachmazidou I	2017-06-01	Whole-Genome Sequencing Coupled to Imputation Discovers Genetic Signals for Anthropometric Traits.	Waist circumference adjusted for body mass index	1,247 whole genome sequenced European ancestry individuals, 3,050 whole genome sequenced individuals, 41,027 European ancestry individuals, 397 Carlantino (founder/genetic isolate) individuals, 790 Friuli Venezia Giulia (founder/genetic isolate) individuals, 1,005 Mylopotamos (founder/genetic isolate) individuals, 875 Pomak (founder/genetic isolate) individuals, 1,754 Val Borbera (founder/genetic…	206,723 European ancestry individuals	1q21.3	KCNN3
chr1	154831142	154831143	rs34245846	Nielsen JB	2018-01-04	Genome-wide Study of Atrial Fibrillation Identifies Seven Risk Loci and Highlights Biological Pathways and Regulatory Elements Involved in Cardiac Development.	Atrial fibrillation	6,337 European ancestry cases, 61,607 European ancestry controls	30,679 European ancestry cases, 278,895 European ancestry controls	1q21.3	KCNN3
chr1	154834182	154834183	rs1218582	Schumacher FR	2018-06-11	Association analyses of more than 140,000 men identify 63 new prostate cancer susceptibility loci.	Prostate cancer	79,148 European ancestry cases, 61,106 European ancestry controls	NA	1q21.3	NR
chr1	154834182	154834183	rs1218582	Eeles RA	2013-04-01	Identification of 23 new prostate cancer susceptibility loci using the iCOGS custom genotyping array.	Prostate cancer	11,085 European ancestry cases, 11,463 European ancestry controls	19,662 European ancestry cases, 19,715 European ancestry controls	1q21.3	ADAM15, ADAR, CKS1B, DCST1, DCST2, EFNA3, EFNA4, LOC10050, FLAD1, KCNN3, LENEP, LOC100505666, MIR4258, PBXIP1, DPM3, PYGO2, EFNA1, SHC1, SLC50A1, ZBTB7B, PMVK
chr1	154848580	154848581	rs72702209	Hernandez Cordero AI	2019-11-21	Genome-wide Associations Reveal Human-Mouse Genetic Convergence and Modifiers of Myogenesis, CPNE1 and STC2.	Appendicular lean mass	181,862 European ancestry elderly individuals	NA	1q21.3	NR
chr1	154849770	154849771	rs12069356	Goes FS	2015-07-21	Genome-wide association study of schizophrenia in Ashkenazi Jews.	Schizophrenia	592 Ashkenazi Jewish ancestry cases, 505 Ashkenazi Jewish ancestry controls, 36,989 cases, 113,075 controls	NA	1q21.3	NR
chr1	154853976	154853977	rs7517628	Kichaev G	2018-12-27	Leveraging Polygenic Functional Enrichment to Improve GWAS Power.	Lung function (FEV1/FVC)	approximately 370,000 European ancestry individuals	NA	1q21.3
chr1	154855054	154855055	rs1630500	Vacic V	2014-05-19	Genome-wide mapping of IBD segments in an Ashkenazi PD cohort identifies associated haplotypes.	Parkinson's disease	1,130 Ashkenazi Jewish cases, 2,611 Ashkenazi Jewish controls	306 Ashkenazi Jewish cases, 2,583 Ashkenazi Jewish controls	1q21.3	GBA
chr1	154856890	154856891	rs77243303	Han X	2020-01-03	Using Mendelian randomization to evaluate the causal relationship between serum C-reactive protein levels and age-related macular degeneration.	C-reactive protein levels	418,642 British ancestry individuals	NA	1q21.3	NR
chr1	154862951	154862952	rs11264280	Nielsen JB	2018-07-30	Biobank-driven genomic discovery yields new insight into atrial fibrillation biology.	Atrial fibrillation	60,620 European ancestry cases, 970,216 European ancestry controls	NA	1q21.3	KCNN3
chr1	154862951	154862952	rs11264280	Roselli C	2018-06-11	Multi-ethnic genome-wide association study for atrial fibrillation.	Atrial fibrillation	55,114 European ancestry cases, 482,295 European ancestry controls, 8,180 Japanese ancestry cases, 28,612 Japanese ancestry controls, 1,307 African American ancestry cases, 7,660 African American ancestry controls, 845 Hispanic cases, 4,177 Hispanic controls	NA	1q21.3	KCNN3, PMVK	(EA)
chr1	154862951	154862952	rs11264280	Roselli C	2018-06-11	Multi-ethnic genome-wide association study for atrial fibrillation.	Atrial fibrillation	55,114 European ancestry cases, 482,295 European ancestry controls, 8,180 Japanese ancestry cases, 28,612 Japanese ancestry controls, 1,307 African American ancestry cases, 7,660 African American ancestry controls, 845 Hispanic cases, 4,177 Hispanic controls	NA	1q21.3	KCNN3, PMVK
chr1	154862951	154862952	rs11264280	Christophersen IE	2017-04-17	Large-scale analyses of common and rare variants identify 12 new loci associated with atrial fibrillation.	Incident atrial fibrillation	7,323 European ancestry cases, 102,776 European ancestry controls.		1q21.3	KCNN3
chr1	154862951	154862952	rs11264280	Christophersen IE	2017-04-17	Large-scale analyses of common and rare variants identify 12 new loci associated with atrial fibrillation.	Atrial fibrillation	15,979 European ancestry cases, 102,776 European ancestry controls.	NA	1q21.3	KCNN3
chr1	154862951	154862952	rs11264280	Christophersen IE	2017-04-17	Large-scale analyses of common and rare variants identify 12 new loci associated with atrial fibrillation.	Atrial fibrillation	15,979 European ancestry cases, 102,776 European ancestry controls, 641 African American cases, 5,234 African American controls, 837 Japanese ancestry cases, 3,293 Japanese controls, 277 Hispanic cases, 3,081 Hispanic controls,197 Brazilian ancestry cases, 758 Brazilian ancestry controls.	3,666 cases, 139,852 controls	1q21.3	KCNN3
chr1	154866092	154866093	rs4845399	Stahl EA	2019-05-01	Genome-wide association study identifies 30 loci associated with bipolar disorder.	Bipolar disorder	20,352 European ancestry cases, 31,358 European ancestry controls	9,412 European ancestry cases, 137,760 European ancestry controls	1q21.3	KCNN3, PMVK, PBXIP1, PYGO2, SHC1, CKS1B, MIR4258, FLAD1, LENEP, ZBTB7B, DCST2, DCST1, LOC100505666, ADAM15
chr1	154898184	154898185	rs114138760	Nalls MA	2019-12-01	Identification of novel risk loci, causal insights, and heritable risk for Parkinson's disease: a meta-analysis of genome-wide association studies.	Parkinson's disease or first degree relation to individual with Parkinson's disease	15,056 European ancestry cases, 18,618 European ancestry proxy cases, 449,056 European ancestry controls	22,632 European ancestry cases, 968,735 European ancestry controls	1q21.3	PMVK
chr1	154910929	154910930	rs58629129	Rashkin SR	2020-09-04	Pan-cancer study detects genetic risk variants and shared genetic basis in two large cohorts.	Prostate cancer	10,792 European ancestry cases, 410,350 European ancestry controls	NA	1q21.3
chr1	154918351	154918352	rs41264253	Zhu Z	2019-10-24	Shared Genetic and Experimental Links between Obesity-Related Traits and Asthma Subtypes in UK Biobank.	Waist-to-hip ratio adjusted for BMI	457,690 European ancestry individuals	NA	1q21.3	NR
chr1	154922598	154922599	rs147350405	Kichaev G	2018-12-27	Leveraging Polygenic Functional Enrichment to Improve GWAS Power.	Red blood cell count	approximately 445,000 European ancestry individuals	NA	1q21.3
chr1	154934962	154934963	rs3766920	Yang SK	2016-08-25	Identification of Loci at 1q21 and 16q23 That Affect Susceptibility to Inflammatory Bowel Disease in Koreans.	Inflammatory bowel disease	1,505 Korean ancestry cases, 4,041 Korean ancestry controls	1,989 Korean ancestry cases, 3,491 Korean ancestry controls	1q21.3	PMVK, PBXIP1, PYGO2, SHC1
chr1	154938661	154938662	rs8191979	Oskarsson GR	2020-04-23	Predicted loss and gain of function mutations in ACO1 are associated with erythropoiesis.	Hemoglobin levels	684,122 European ancestry individuals	NA	1q21.3	SHC1
chr1	154941262	154941263	rs8191981	Chen MH	2020-09-01	Trans-ethnic and Ancestry-Specific Blood-Cell Genetics in 746,667 Individuals from 5 Global Populations.	Eosinophil counts	86,890 East Asian ancestry individuals	NA	1q21.3	NR
chr1	154941262	154941263	rs8191981	Kanai M	2018-02-05	Genetic analysis of quantitative traits in the Japanese population links cell types to complex human diseases.	Eosinophil counts	62,076 Japanese ancestry individuals	NA	1q21.3	SHC1
chr1	154968259	154968260	rs7525164	Vuckovic D	2020-09-01	The Polygenic and Monogenic Basis of Blood Traits and Diseases.	Red blood cell count	408,112 British individuals	NA	1q21.3	FLAD1, LENEP
chr1	154976517	154976518	rs113405739	Vuckovic D	2020-09-01	The Polygenic and Monogenic Basis of Blood Traits and Diseases.	Hemoglobin	408,112 British individuals	NA	1q21.3	ZBTB7B
chr1	154976517	154976518	rs113405739	Vuckovic D	2020-09-01	The Polygenic and Monogenic Basis of Blood Traits and Diseases.	Hematocrit	408,112 British individuals	NA	1q21.3	ZBTB7B
chr1	154977928	154977929	rs4845402	Hysi PG	2020-03-30	Meta-analysis of 542,934 subjects of European ancestry identifies new genes and mechanisms predisposing to refractive error and myopia.	Refractive error	542,934 European ancestry individuals	NA	1q21.3	FLAD1, ZBTB7B, EFNA3, EFNA1, SLC50A1, KRTCAP2
chr1	154980340	154980341	rs12142017	Zhu Z	2019-10-24	Shared Genetic and Experimental Links between Obesity-Related Traits and Asthma Subtypes in UK Biobank.	Waist-to-hip ratio adjusted for BMI	457,690 European ancestry individuals	NA	1q21.3	NR
chr1	154980350	154980351	rs56103503	Conti DV	2021-01-04	Trans-ancestry genome-wide association meta-analysis of prostate cancer identifies new susceptibility loci and informs genetic risk prediction.	Prostate cancer	85,554 European ancestry cases, 10,368 African ancestry cases, 8,611 East Asian ancestry cases, 2,714 Hispanic cases, 91,972 European ancestry controls, 10,986 African ancestry controls, 18,809 East Asian ancestry controls, 5,239 Hispanic controls	NA	1q21.3	NR
chr1	154984362	154984363	rs1870940	Verweij N	2020-09-02	The Genetic Makeup of the Electrocardiogram.	Electrocardiogram morphology (amplitude at temporal datapoints)	63,706 European and unknown ancestry individuals	NA	1q21.3	ZBTB7B, DCST2	(92 ms)
chr1	154984362	154984363	rs1870940	Verweij N	2020-09-02	The Genetic Makeup of the Electrocardiogram.	Electrocardiogram morphology (amplitude at temporal datapoints)	63,706 European and unknown ancestry individuals	NA	1q21.3	ZBTB7B, DCST2	(94 ms)
chr1	154984362	154984363	rs1870940	Verweij N	2020-09-02	The Genetic Makeup of the Electrocardiogram.	Electrocardiogram morphology (amplitude at temporal datapoints)	63,706 European and unknown ancestry individuals	NA	1q21.3	ZBTB7B, DCST2	(96 ms)
chr1	154984362	154984363	rs1870940	Verweij N	2020-09-02	The Genetic Makeup of the Electrocardiogram.	Electrocardiogram morphology (amplitude at temporal datapoints)	63,706 European and unknown ancestry individuals	NA	1q21.3	ZBTB7B, DCST2	(108 ms)
chr1	154984362	154984363	rs1870940	Verweij N	2020-09-02	The Genetic Makeup of the Electrocardiogram.	Electrocardiogram morphology (amplitude at temporal datapoints)	63,706 European and unknown ancestry individuals	NA	1q21.3	ZBTB7B, DCST2	(106 ms)
chr1	154984362	154984363	rs1870940	Rashkin SR	2020-09-04	Pan-cancer study detects genetic risk variants and shared genetic basis in two large cohorts.	Cancer (pleiotropy)(bidirectional)	64,962 European ancestry cases, 410,350 European ancestry controls	NA	1q21.3
chr1	154984362	154984363	rs1870940	Ruth KS	2020-02-10	Using human genetics to understand the disease impacts of testosterone in men and women.	Total testosterone levels	425,097 European ancestry individuals	NA	1q21.3	NR
chr1	154984362	154984363	rs1870940	Ruth KS	2020-02-10	Using human genetics to understand the disease impacts of testosterone in men and women.	Total testosterone levels	230,454 European ancestry women	NA	1q21.3	NR
chr1	154984362	154984363	rs1870940	Liyanage UE	2019-06-07	Combined analysis of keratinocyte cancers identifies novel genome-wide loci.	Keratinocyte cancer (MTAG)	at least 18,538 European ancestry cases, at least 340,302 European ancestry controls	NA	1q21.3	ZBTB7B
chr1	154984362	154984363	rs1870940	Liyanage UE	2019-06-07	Combined analysis of keratinocyte cancers identifies novel genome-wide loci.	Basal cell carcinoma	31,787 European ancestry cases, 619,351 European ancestry controls	NA	1q21.3	ZBTB7B
chr1	154984362	154984363	rs1870940	Kichaev G	2018-12-27	Leveraging Polygenic Functional Enrichment to Improve GWAS Power.	Eczema	approximately 459,000 European ancestry individuals	NA	1q21.3
chr1	154986090	154986091	rs3753639	Richardson TG	2020-05-06	Use of genetic variation to separate the effects of early and later life adiposity on disease risk: mendelian randomisation study.	Adult body size	453,169 European ancestry individuals		1q21.3	ZBTB7B
chr1	154986090	154986091	rs3753639	Zhu Z	2019-10-24	Shared Genetic and Experimental Links between Obesity-Related Traits and Asthma Subtypes in UK Biobank.	Body mass index	457,822 European ancestry individuals	NA	1q21.3	NR
chr1	154986090	154986091	rs3753639	Horikoshi M	2016-10-13	Genome-wide associations for birth weight and correlations with adult disease.	Birth weight	133,903 European ancestry individuals, 6,635 African American individuals, 420 Turkish ancestry individuals, 365 Moroccan ancestry individuals, 395 Surinamese ancestry individuals, 840 Chinese ancestry individuals.	9,799 European ancestry individuals, 1,449 Filipino ancestry individuals.	1q21.3	ZBTB7B
chr1	154987703	154987704	rs141845046	Justice AE	2019-02-18	Protein-coding variants implicate novel genes related to lipid homeostasis contributing to body-fat distribution.	Waist-to-hip ratio adjusted for BMI (additive genetic model)	up to 157,516 European ancestry women, up to 180,131 African American, South Asian, East Asian and Hispanic ancestry women	up to 62,368 European ancestry women	1q21.3	ZBTB7B
chr1	154987703	154987704	rs141845046	Justice AE	2019-02-18	Protein-coding variants implicate novel genes related to lipid homeostasis contributing to body-fat distribution.	Waist-to-hip ratio adjusted for BMI (additive genetic model)	up to 157,516 European ancestry women	up to 62,368 European ancestry women	1q21.3	ZBTB7B
chr1	154987703	154987704	rs141845046	Justice AE	2019-02-18	Protein-coding variants implicate novel genes related to lipid homeostasis contributing to body-fat distribution.	Waist-to-hip ratio adjusted for BMI (additive genetic model)	288,492 European ancestry individuals, up to 15,687 African American individuals, up to 29,315 South Asian ancestry individuals, up to 6,800 East Asian ancestry individuals, up to 4,075 Hispanic ancestry individuals	132,177 European ancestry individuals	1q21.3	ZBTB7B
chr1	154987703	154987704	rs141845046	Justice AE	2019-02-18	Protein-coding variants implicate novel genes related to lipid homeostasis contributing to body-fat distribution.	Waist-to-hip ratio adjusted for BMI (additive genetic model)	288,492 European ancestry individuals	132,177 European ancestry individuals	1q21.3	ZBTB7B
chr1	154987703	154987704	rs141845046	Turcot V	2017-12-22	Protein-altering variants associated with body mass index implicate pathways that control energy intake and expenditure in obesity.	Body mass index	up to 449,889 European ancestry individuals, up to 29,398 South Asian ancestry individuals, up to 27,610 African American individuals, up to 8,839 East Asian individuals, up to 10,772 Hispanic ancestry individuals	up to 196,766 European ancestry individuals	1q21.3	ZBTB7B
chr1	154988532	154988533	rs77548871	Pei YF	2020-10-23	The genetic architecture of appendicular lean mass characterized by association analysis in the UK Biobank study.	Appendicular lean mass	450,243 European ancestry individuals	NA	1q21.3	NR
chr1	154988532	154988533	rs77548871	Hernandez Cordero AI	2019-11-21	Genome-wide Associations Reveal Human-Mouse Genetic Convergence and Modifiers of Myogenesis, CPNE1 and STC2.	Appendicular lean mass	85,750 European ancestry middle-aged adult individuals	NA	1q21.3	NR
chr1	154988532	154988533	rs77548871	Kar SP	2016-07-17	Genome-Wide Meta-Analyses of Breast, Ovarian, and Prostate Cancer Association Studies Identify Multiple New Susceptibility Loci Shared by at Least Two Cancer Types.	Breast cancer, ovarian cancer or prostate cancer (pleiotropy)	62,533 European ancestry breast cancer female cases, 60,976 European ancestry controls, 15,437 European ancestry invasive epithelial ovarian cancer female cases, 30,845 European ancestry controls, 34,379 European ancestry prostate cancer male cases, 33,164 European ancestry controls	NA	1q21.3	ZBTB7B
chr1	154988956	154988957	rs2242195	Kichaev G	2018-12-27	Leveraging Polygenic Functional Enrichment to Improve GWAS Power.	Body mass index	approximately 458,000 European ancestry individuals	NA	1q21.3
chr1	154990296	154990297	rs2242194	Goes FS	2015-07-21	Genome-wide association study of schizophrenia in Ashkenazi Jews.	Schizophrenia	592 Ashkenazi Jewish ancestry cases, 505 Ashkenazi Jewish ancestry controls, 36,989 cases, 113,075 controls	NA	1q21.3	NR
chr1	154991388	154991389	rs905938	Yang XL	2019-10-11	Three Novel Loci for Infant Head Circumference Identified by a Joint Association Analysis.	Birth weight (MTAG)	up to 182,902 European ancestry individuals	NA	1q21.3	NR
chr1	154991388	154991389	rs905938	Yang XL	2019-10-11	Three Novel Loci for Infant Head Circumference Identified by a Joint Association Analysis.	Birth length (MTAG)	up to 182,902 European ancestry individuals	NA	1q21.3	NR
chr1	154991388	154991389	rs905938	Zhu Z	2019-10-24	Shared Genetic and Experimental Links between Obesity-Related Traits and Asthma Subtypes in UK Biobank.	Waist-to-hip ratio adjusted for BMI	457,690 European ancestry individuals	NA	1q21.3	NR
chr1	154991388	154991389	rs905938	Plotnikov D	2019-05-16	Association between birth weight and refractive error in adulthood: a Mendelian randomisation study.	Birth weight	188,039 European ancestry individuals	NA	1q21.3	NR
chr1	154991388	154991389	rs905938	Warrington NM	2019-05-01	Maternal and fetal genetic effects on birth weight and their relevance to cardio-metabolic risk factors.	Offspring birth weight	210,267 European ancestry individuals, 19,802 individuals	NR	1q21.3	DCST2, KCNN3
chr1	154991388	154991389	rs905938	Warrington NM	2019-05-01	Maternal and fetal genetic effects on birth weight and their relevance to cardio-metabolic risk factors.	Birth weight	298,142 European ancestry individuals, 6,635 African American individuals, 1,449 Filipino individuals, 420 Turkish individuals, 365 Moroccan individuals, 395 Surinamese individuals, 1,052 Afro-Caribbean individuals, 612 Hispanic individuals, 1,180 Thai individuals, 840 Chinese ancestry individuals, 10,133 individuals	NR	1q21.3	DCST2, KCNN3
chr1	154991388	154991389	rs905938	Kichaev G	2018-12-27	Leveraging Polygenic Functional Enrichment to Improve GWAS Power.	Waist-hip ratio	approximately 458,000 European ancestry individuals	NA	1q21.3
chr1	154991388	154991389	rs905938	Lotta LA	2018-12-01	Association of Genetic Variants Related to Gluteofemoral vs Abdominal Fat Distribution With Type 2 Diabetes, Coronary Disease, and Cardiovascular Risk Factors.	Waist-to-hip ratio adjusted for BMI	660,648 European ancestry individuals	NA	1q21.3	NR
chr1	154991388	154991389	rs905938	Lotta LA	2018-12-01	Association of Genetic Variants Related to Gluteofemoral vs Abdominal Fat Distribution With Type 2 Diabetes, Coronary Disease, and Cardiovascular Risk Factors.	Waist-hip ratio	663,598 European ancestry individuals	NA	1q21.3	NR
chr1	154991388	154991389	rs905938	Pulit SL	2018-09-14	Meta-analysis of genome-wide association studies for body fat distribution in 694,649 individuals of European ancestry.	Waist-to-hip ratio adjusted for BMI	379,501 European ancestry female individuals	NA	1q21.3	NR
chr1	154991388	154991389	rs905938	Pulit SL	2018-09-14	Meta-analysis of genome-wide association studies for body fat distribution in 694,649 individuals of European ancestry.	Waist-hip ratio	697,734 European ancestry individuals	NA	1q21.3	NA
chr1	154991388	154991389	rs905938	Pulit SL	2018-09-14	Meta-analysis of genome-wide association studies for body fat distribution in 694,649 individuals of European ancestry.	Waist-hip ratio	381,152 European female individuals	NA	1q21.3	NR
chr1	154991388	154991389	rs905938	Justice AE	2017-04-26	Genome-wide meta-analysis of 241,258 adults accounting for smoking behaviour identifies novel loci for obesity traits.	Waist-to-hip ratio adjusted for BMI (adjusted for smoking behaviour)	95,362 European ancestry women, 62,085 European ancestry men, 5,829 European ancestry individuals, 10,500 African American/Afro-Caribbean ancestry women, 2,706 African American/Afro-Caribbean ancestry men, 1,030 Indian Asian ancestry women, 7,648 Indian Asian ancestry men, 1,793 Filipino ancestry women, 2,944 Hispanic/Latino ancestry women, 1,764 Hispanic/Latino ancestry men	21,496 European ancestry women, 24,385 European ancestry men, 118,364 European ancestry individuals, 2,326 African American/Afro-Caribbean ancestry women, 855 African American/Afro-Caribbean ancestry men	1q21.3	DCST2
chr1	154991388	154991389	rs905938	Justice AE	2017-04-26	Genome-wide meta-analysis of 241,258 adults accounting for smoking behaviour identifies novel loci for obesity traits.	Waist-to-hip ratio adjusted for BMI (adjusted for smoking behaviour)	95,362 European ancestry women, 62,085 European ancestry men, 5,829 European ancestry individuals, 10,500 African American/Afro-Caribbean ancestry women, 2,706 African American/Afro-Caribbean ancestry men, 1,030 Indian Asian ancestry women, 7,648 Indian Asian ancestry men, 1,793 Filipino ancestry women, 2,944 Hispanic/Latino ancestry women, 1,764 Hispanic/Latino ancestry men	21,496 European ancestry women, 24,385 European ancestry men, 118,364 European ancestry individuals, 2,326 African American/Afro-Caribbean ancestry women, 855 African American/Afro-Caribbean ancestry men	1q21.3	DCST2	(women)
chr1	154991388	154991389	rs905938	Winkler TW	2015-10-01	The Influence of Age and Sex on Genetic Associations with Adult Body Size and Shape: A Large-Scale Genome-Wide Interaction Study.	Waist-to-hip ratio adjusted for BMI x sex x age interaction (4df test)	up to 43,776 European ancestry men aged <50, up to 50,526 European ancestry women aged <50, up to 69,944 European ancestry men aged >50, up to 88,129 European ancestry women aged >50	NA	1q21.3	NR
chr1	154991388	154991389	rs905938	Winkler TW	2015-10-01	The Influence of Age and Sex on Genetic Associations with Adult Body Size and Shape: A Large-Scale Genome-Wide Interaction Study.	Waist-to-hip ratio adjusted for BMI	up to 113,720 European ancestry men, up to 138,655 European ancestry women	NA	1q21.3	NR
chr1	154991388	154991389	rs905938	Shungin D	2015-02-12	New genetic loci link adipose and insulin biology to body fat distribution.	Waist-to-hip ratio adjusted for body mass index	up to 56,910 European ancestry men, up to 86,570 European ancestry women	up to 36,570 European ancestry men, 30,172 European ancestry women, 915 Filipino ancestry men, 735 Filipino ancestry women, 2,351 African American/Afro-Caribbean ancestry men, 6,258 African American/Afro-Caribbean ancestry women, 2,285 South Asian ancestry men, 506 South Asian ancestry women, 195 Seychellois ancestry men, 266 Seychellois ancestry women	1q21.3	DCST2
chr1	154991388	154991389	rs905938	Shungin D	2015-02-12	New genetic loci link adipose and insulin biology to body fat distribution.	Waist-to-hip ratio adjusted for body mass index	up to 56,910 European ancestry men, up to 86,570 European ancestry women	up to 36,570 European ancestry men, 30,172 European ancestry women, 915 Filipino ancestry men, 735 Filipino ancestry women, 2,351 African American/Afro-Caribbean ancestry men, 6,258 African American/Afro-Caribbean ancestry women, 2,285 South Asian ancestry men, 506 South Asian ancestry women, 195 Seychellois ancestry men, 266 Seychellois ancestry women	1q21.3	DCST2	(EA)
chr1	154991388	154991389	rs905938	Shungin D	2015-02-12	New genetic loci link adipose and insulin biology to body fat distribution.	Waist-to-hip ratio adjusted for body mass index	up to 56,910 European ancestry men, up to 86,570 European ancestry women	up to 36,570 European ancestry men, 30,172 European ancestry women, 915 Filipino ancestry men, 735 Filipino ancestry women, 2,351 African American/Afro-Caribbean ancestry men, 6,258 African American/Afro-Caribbean ancestry women, 2,285 South Asian ancestry men, 506 South Asian ancestry women, 195 Seychellois ancestry men, 266 Seychellois ancestry women	1q21.3	DCST2	(EA, women)
chr1	154991388	154991389	rs905938	Shungin D	2015-02-12	New genetic loci link adipose and insulin biology to body fat distribution.	Waist-to-hip ratio adjusted for body mass index	up to 56,910 European ancestry men, up to 86,570 European ancestry women	up to 36,570 European ancestry men, 30,172 European ancestry women, 915 Filipino ancestry men, 735 Filipino ancestry women, 2,351 African American/Afro-Caribbean ancestry men, 6,258 African American/Afro-Caribbean ancestry women, 2,285 South Asian ancestry men, 506 South Asian ancestry women, 195 Seychellois ancestry men, 266 Seychellois ancestry women	1q21.3	DCST2	(women)
chr1	154991388	154991389	rs905938	van der Valk RJ	2014-10-03	A novel common variant in DCST2 is associated with length in early life and height in adulthood.	Birth length	28,459 European ancestry individuals	16,145 European ancestry individuals, 280 Moroccan ancestry individuals, 284 Surinamese ancestry individuals, 319 Turkish ancestry individuals, 651 Chinese ancestry individuals	1q21.3	DCST2
chr1	154993374	154993375	rs4845703	Zhu Z	2019-10-24	Shared Genetic and Experimental Links between Obesity-Related Traits and Asthma Subtypes in UK Biobank.	Waist-to-hip ratio adjusted for BMI	457,690 European ancestry individuals	NA	1q21.3	NR
chr1	154994749	154994750	rs11264296	Vuckovic D	2020-09-01	The Polygenic and Monogenic Basis of Blood Traits and Diseases.	Eosinophil counts	408,112 British individuals	NA	1q21.3	DCST2
chr1	154994749	154994750	rs11264296	Kichaev G	2018-12-27	Leveraging Polygenic Functional Enrichment to Improve GWAS Power.	Eosinophil counts	approximately 440,000 European ancestry individuals	NA	1q21.3
chr1	154994977	154994978	rs76798800	Pei YF	2020-10-23	The genetic architecture of appendicular lean mass characterized by association analysis in the UK Biobank study.	Appendicular lean mass	450,243 European ancestry individuals	NA	1q21.3	NR
chr1	154994977	154994978	rs76798800	Landi MT	2020-04-27	Genome-wide association meta-analyses combining multiple risk phenotypes provide insights into the genetic architecture of cutaneous melanoma susceptibility.	Nevus count or cutaneous melanoma	36,760 European ancestry cutaneous melanoma cases, 375,188 European ancestry controls, 12,930 European ancestry individuals, 52,847 individuals	NA	1q21.3	DCST2
chr1	154994977	154994978	rs76798800	Landi MT	2020-04-27	Genome-wide association meta-analyses combining multiple risk phenotypes provide insights into the genetic architecture of cutaneous melanoma susceptibility.	Cutaneous malignant melanoma	36,760 European ancestry cases, 375,188 European ancestry controls	NA	1q21.3	DCST2
chr1	154994977	154994978	rs76798800	Revez JA	2020-04-02	Genome-wide association study identifies 143 loci associated with 25 hydroxyvitamin D concentration.	Serum 25-Hydroxyvitamin D levels	496,946 European ancestry individuals	NA	1q21.3
chr1	154994977	154994978	rs76798800	Revez JA	2020-04-02	Genome-wide association study identifies 143 loci associated with 25 hydroxyvitamin D concentration.	Serum 25-Hydroxyvitamin D levels	417,580 European ancestry individuals	NA	1q21.3
chr1	154994977	154994978	rs76798800	Hernandez Cordero AI	2019-11-21	Genome-wide Associations Reveal Human-Mouse Genetic Convergence and Modifiers of Myogenesis, CPNE1 and STC2.	Appendicular lean mass	85,750 European ancestry middle-aged adult individuals	NA	1q21.3	NR
chr1	154994977	154994978	rs76798800	Hernandez Cordero AI	2019-11-21	Genome-wide Associations Reveal Human-Mouse Genetic Convergence and Modifiers of Myogenesis, CPNE1 and STC2.	Appendicular lean mass	181,862 European ancestry elderly individuals	NA	1q21.3	NR
chr1	154994977	154994978	rs76798800	Hubel C	2018-12-28	Genomics of body fat percentage may contribute to sex bias in anorexia nervosa.	Fat-free mass	70,700 European ancestry female individuals, 85,261 European ancestry male individuals	NA	1q21.3	NR
chr1	154994977	154994978	rs76798800	Hubel C	2018-12-28	Genomics of body fat percentage may contribute to sex bias in anorexia nervosa.	Fat-free mass	70,700 European ancestry female individuals, 85,261 European ancestry male individuals	NA	1q21.3	NR	(male)
chr1	154994977	154994978	rs76798800	Hubel C	2018-12-28	Genomics of body fat percentage may contribute to sex bias in anorexia nervosa.	Fat-free mass	70,700 European ancestry female individuals, 85,261 European ancestry male individuals	NA	1q21.3	NR	(female)
chr1	154997571	154997572	rs113261881	Richardson TG	2020-03-23	Evaluating the relationship between circulating lipoprotein lipids and apolipoproteins with risk of coronary heart disease: A multivariable Mendelian randomisation analysis.	HDL cholesterol levels	403,943 European ancestry individuals	NA	1q21.3	DCST2
chr1	155001280	155001281	rs150138294	Zhu Z	2019-10-24	Shared Genetic and Experimental Links between Obesity-Related Traits and Asthma Subtypes in UK Biobank.	Waist-to-hip ratio adjusted for BMI	457,690 European ancestry individuals	NA	1q21.3	NR
chr1	155006449	155006450	rs74520550	Kichaev G	2018-12-27	Leveraging Polygenic Functional Enrichment to Improve GWAS Power.	Height	approximately 458,000 European ancestry individuals	NA	1q21.3
chr1	155006450	155006451	rs76306191	Rueger S	2018-05-21	Evaluation and application of summary statistic imputation to discover new height-associated loci.	Height	253,288 European ancestry individuals	336,474 European ancestry individuals	1q21.3	DCST1
chr1	155016126	155016127	rs76735429	Zhang Q	2018-10-22	Genotype effects contribute to variation in longitudinal methylome patterns in older people.	DNA methylation variation (age effect)	Up to 954 individuals	NA	1q21.3	NR
chr1	155027218	155027219	rs569036944	Chai JF	2020-09-16	Genome-wide association for HbA1c in Malay identified deletion on SLC4A1 that influences HbA1c independent of glycemia.	Glycated hemoglobin levels	2,704 Malay ancestry individuals	NA	1q21.3
chr1	155028521	155028522	rs11264302	Timmins IR	2020-10-30	Genome-wide association study of self-reported walking pace suggests beneficial effects of brisk walking on health and survival.	Walking pace	450,967 European ancestry individuals	NA	1q21.3	ADAM15
chr1	155030556	155030557	rs11264303	Vuckovic D	2020-09-01	The Polygenic and Monogenic Basis of Blood Traits and Diseases.	Eosinophil percentage of white cells	408,112 British individuals	NA	1q21.3	ADAM15
chr1	155033307	155033308	rs11589479	Karlsson Linner R	2019-01-14	Genome-wide association analyses of risk tolerance and risky behaviors in over 1 million individuals identify hundreds of loci and shared genetic influences.	Adventurousness	557,923 European ancestry individuals	NA	1q21.3	EFNA4
chr1	155033307	155033308	rs11589479	Jones AV	2017-04-01	GWAS of self-reported mosquito bite size, itch intensity and attractiveness to mosquitoes implicates immune-related predisposition loci.	Mosquito bite size	84,724 European ancestry individuals	NA	1q21.3	ADAM15
chr1	155033307	155033308	rs11589479	Pickrell JK	2016-05-16	Detection and interpretation of shared genetic influences on 42 human traits.	Chin dimples	58,032 European ancestry cases, 13,457 European ancestry controls	NA	1q21.3	ADAM15
chr1	155033917	155033918	rs41264285	Karlsson Linner R	2019-01-14	Genome-wide association analyses of risk tolerance and risky behaviors in over 1 million individuals identify hundreds of loci and shared genetic influences.	General risk tolerance (MTAG)	975,353 European ancestry individuals	NA	1q21.3	ADAM15
chr1	155033917	155033918	rs41264285	Liu M	2019-01-14	Association studies of up to 1.2 million individuals yield new insights into the genetic etiology of tobacco and alcohol use.	Smoking initiation (ever regular vs never regular) (MTAG)	up to 1,359,002 European ancestry individuals	NA	1q21.3	NR
chr1	155033917	155033918	rs41264285	Langefeld CD	2017-07-17	Transancestral mapping and genetic load in systemic lupus erythematosus.	Systemic lupus erythematosus	6,748 European ancestry cases, 11,516 European ancestry controls	NA	1q21.3	ADAM15, EFNA1
chr1	155034631	155034632	rs45444697	Liu M	2019-01-14	Association studies of up to 1.2 million individuals yield new insights into the genetic etiology of tobacco and alcohol use.	Smoking initiation (ever regular vs never regular)	up to 1,232,091 European ancestry individuals	NA	1q21.3	NR	(Conditioned on chr1:154206358)
chr1	155034631	155034632	rs45444697	Sun BB	2018-06-06	Genomic atlas of the human plasma proteome.	Blood protein levels	3,301 European ancestry individuals	NA	1q21.3	NR	(Sushi, von Willebrand factor type A, EGF and pentraxin domain-containing protein 1, SVEP1.11178.21.3)
chr1	155046401	155046402	rs72702268	Pei YF	2020-10-23	The genetic architecture of appendicular lean mass characterized by association analysis in the UK Biobank study.	Appendicular lean mass	450,243 European ancestry individuals	NA	1q21.3	NR
chr1	155046401	155046402	rs72702268	Hernandez Cordero AI	2019-11-21	Genome-wide Associations Reveal Human-Mouse Genetic Convergence and Modifiers of Myogenesis, CPNE1 and STC2.	Appendicular lean mass	85,750 European ancestry middle-aged adult individuals	NA	1q21.3	NR
chr1	155066415	155066416	rs10908454	Revez JA	2020-04-02	Genome-wide association study identifies 143 loci associated with 25 hydroxyvitamin D concentration.	Serum 25-Hydroxyvitamin D levels	496,946 European ancestry individuals	NA	1q21.3
chr1	155071587	155071588	rs57742792	Han X	2019-09-06	Genome-wide association analysis of 95 549 individuals identifies novel loci and genes influencing optic disc morphology.	Optic disc size	67,040 British ancestry individuals	28,509 European ancestry individuals	1q21.3	EFNA3
chr1	155076733	155076734	rs7366355	Boutin TS	2019-12-09	Insights into the genetic basis of retinal detachment.	Cataracts (operation)	21,679 British ancestry cases, 387,283 British ancestry controls	NA	1q22	EFNA3
chr1	155082157	155082158	rs11581730	Warrington NM	2018-04-12	Genome-wide association study identifies nine novel loci for 2D:4D finger ratio, a putative retrospective biomarker of testosterone exposure in utero.	Digit length ratio (right hand)	12,636 European ancestry individuals	NA	1q22	EFNA1
chr1	155082157	155082158	rs11581730	Warrington NM	2018-04-12	Genome-wide association study identifies nine novel loci for 2D:4D finger ratio, a putative retrospective biomarker of testosterone exposure in utero.	Digit length ratio (left hand)	14,382 European ancestry individuals, 1,279 non-European ancestry individuals	NA	1q22	EFNA1	(EA)
chr1	155082157	155082158	rs11581730	Warrington NM	2018-04-12	Genome-wide association study identifies nine novel loci for 2D:4D finger ratio, a putative retrospective biomarker of testosterone exposure in utero.	Digit length ratio (left hand)	14,382 European ancestry individuals, 1,279 non-European ancestry individuals	NA	1q22	EFNA1
chr1	155082157	155082158	rs11581730	Warrington NM	2018-04-12	Genome-wide association study identifies nine novel loci for 2D:4D finger ratio, a putative retrospective biomarker of testosterone exposure in utero.	Digit length ratio	12,586 European ancestry individuals	NA	1q22	EFNA1
chr1	155087410	155087411	rs34455078	Greenwood TA	2019-10-09	Genome-wide Association of Endophenotypes for Schizophrenia From the Consortium on the Genetics of Schizophrenia (COGS) Study.	Emotional recognition	523 European ancestry schizophrenia cases, 100 Latino schizophrenia cases, 827 European ancestry controls, 83 Latino controls	NA	1q22	EFNA1
chr1	155087932	155087933	rs11264322	Revez JA	2020-04-02	Genome-wide association study identifies 143 loci associated with 25 hydroxyvitamin D concentration.	Serum 25-Hydroxyvitamin D levels	417,580 European ancestry individuals	NA	1q22
chr1	155089010	155089011	rs76268375	Zhu Z	2019-10-24	Shared Genetic and Experimental Links between Obesity-Related Traits and Asthma Subtypes in UK Biobank.	Waist-to-hip ratio adjusted for BMI	457,690 European ancestry individuals	NA	1q22	NR
chr1	155090104	155090105	rs11264323	Vuckovic D	2020-09-01	The Polygenic and Monogenic Basis of Blood Traits and Diseases.	Plateletcrit	408,112 British individuals	NA	1q22	Y_RNA
chr1	155091175	155091176	rs61811931	Skuladottir AT	2021-02-18	A meta-analysis uncovers the first sequence variant conferring risk of Bell's palsy.	Bell's palsy	4,714 European ancestry cases, 1,011,520 European ancestry controls	NA	1q22	intergenic
chr1	155094604	155094605	rs11807418	Ripatti P	2020-03-10	Polygenic Hyperlipidemias and Coronary Artery Disease Risk.	Low density lipoprotein cholesterol levels	324,708 British ancestry individuals	NA	1q22	MTX1
chr1	155095106	155095107	rs11264327	Haas ME	2018-09-06	Genetic Association of Albuminuria with Cardiometabolic Disease and Blood Pressure.	Urinary albumin excretion	382,500 European ancestry individuals	NA	1q22	EFNA3, EFNA1
chr1	155095749	155095750	rs9330264	Li M	2017-06-06	Genome-wide association study of 1,5-anhydroglucitol identifies novel genetic loci linked to glucose metabolism.	1,5-anhydroglucitol levels	7,550 European ancestry individuals	8,790 European ancestry individuals, 2,030 African American individuals	1q22	EFNA1/SLC50A1	(EA)
chr1	155098904	155098905	rs11264330	Comuzzie AG	2012-12-04	Novel genetic loci identified for the pathophysiology of childhood obesity in the Hispanic population.	Obesity-related traits	815 Hispanic children from 263 families	NA	1q22	EFNA1	(MCP1 )
chr1	155106053	155106054	rs4390169	Kichaev G	2018-12-27	Leveraging Polygenic Functional Enrichment to Improve GWAS Power.	Hair color	approximately 452,000 European ancestry individuals	NA	1q22
chr1	155106226	155106227	rs4745	Verweij N	2020-09-02	The Genetic Makeup of the Electrocardiogram.	Electrocardiogram morphology (amplitude at temporal datapoints)	63,706 European and unknown ancestry individuals	NA	1q22	EFNA1, SLC50A1, DPM3	(32 ms)
chr1	155106226	155106227	rs4745	Verweij N	2020-09-02	The Genetic Makeup of the Electrocardiogram.	Electrocardiogram morphology (amplitude at temporal datapoints)	63,706 European and unknown ancestry individuals	NA	1q22	EFNA1, SLC50A1, DPM3	(34 ms)
chr1	155106226	155106227	rs4745	Verweij N	2020-09-02	The Genetic Makeup of the Electrocardiogram.	Electrocardiogram morphology (amplitude at temporal datapoints)	63,706 European and unknown ancestry individuals	NA	1q22	EFNA1, SLC50A1, DPM3	(26 ms)
chr1	155106226	155106227	rs4745	Verweij N	2020-09-02	The Genetic Makeup of the Electrocardiogram.	Electrocardiogram morphology (amplitude at temporal datapoints)	63,706 European and unknown ancestry individuals	NA	1q22	EFNA1, SLC50A1, DPM3	(22 ms)
chr1	155106226	155106227	rs4745	Verweij N	2020-09-02	The Genetic Makeup of the Electrocardiogram.	Electrocardiogram morphology (amplitude at temporal datapoints)	63,706 European and unknown ancestry individuals	NA	1q22	EFNA1, SLC50A1, DPM3	(20 ms)
chr1	155106226	155106227	rs4745	Verweij N	2020-09-02	The Genetic Makeup of the Electrocardiogram.	Electrocardiogram morphology (amplitude at temporal datapoints)	63,706 European and unknown ancestry individuals	NA	1q22	EFNA1, SLC50A1, DPM3	(28 ms)
chr1	155106226	155106227	rs4745	Verweij N	2020-09-02	The Genetic Makeup of the Electrocardiogram.	Electrocardiogram morphology (amplitude at temporal datapoints)	63,706 European and unknown ancestry individuals	NA	1q22	EFNA1, SLC50A1, DPM3	(30 ms)
chr1	155106226	155106227	rs4745	Verweij N	2020-09-02	The Genetic Makeup of the Electrocardiogram.	Electrocardiogram morphology (amplitude at temporal datapoints)	63,706 European and unknown ancestry individuals	NA	1q22	EFNA1, SLC50A1, DPM3	(24 ms)
chr1	155106226	155106227	rs4745	Liu DJ	2017-10-30	Exome-wide association study of plasma lipids in >300,000 individuals.	Low density lipoprotein cholesterol levels	up to 237,050 European ancestry individuals, up to 16,935 African ancestry individuals, up to 30,468 South Asian ancestry individuals, up to 8,287 East Asian ancestry individuals, 5,084 Hispanic individuals	up to 286,268 European and unknown ancestry individuals	1q22	NR
chr1	155106226	155106227	rs4745	Liu DJ	2017-10-30	Exome-wide association study of plasma lipids in >300,000 individuals.	Low density lipoprotein cholesterol levels	up to 237,050 European ancestry individuals	NA	1q22	NR
chr1	155106696	155106697	rs12904	Chen VL	2021-02-05	Genome-wide association study of serum liver enzymes implicates diverse metabolic and liver pathology.	Aspartate aminotransferase levels	389,565 European ancestry individuals	134,182 East Asian ancestry individuals	1q22	EFNA1
chr1	155106696	155106697	rs12904	Chen VL	2021-02-05	Genome-wide association study of serum liver enzymes implicates diverse metabolic and liver pathology.	Alanine aminotransferase levels	390,812 European ancestry individuals	134,154 East Asian ancestry individuals	1q22	EFNA1
chr1	155106696	155106697	rs12904	Nielsen JB	2020-12-18	Loss-of-function genomic variants highlight potential therapeutic targets for cardiovascular disease.	Gamma glutamyl transferase levels	76,081 European ancestry individuals, 127,395 Japanese ancestry individuals	NA	1q22	EFNA1
chr1	155108166	155108167	rs12726330	Pankratz N	2012-03-01	Meta-analysis of Parkinson's disease: identification of a novel locus, RIT2.	Parkinson's disease	4,238 European ancestry cases, 4,239 European ancestry controls	3,738 European ancestry cases, 2,111 European ancestry controls	1q22	GBA
chr1	155111306	155111307	rs71628645	Kichaev G	2018-12-27	Leveraging Polygenic Functional Enrichment to Improve GWAS Power.	Red blood cell count	approximately 445,000 European ancestry individuals	NA	1q22
chr1	155115259	155115260	rs4246529	Tin A	2019-10-02	Target genes, variants, tissues and transcriptional pathways influencing human serum urate levels.	Urate levels	288,649 European ancestry individuals, 125,725 East Asian ancestry individuals, 33,671 African American individuals, 9,037 South Asian ancestry individuals, 608 Hispanic individuals	NA	1q22	DPM3	(AA)
chr1	155118587	155118588	rs147847496	Conti DV	2021-01-04	Trans-ancestry genome-wide association meta-analysis of prostate cancer identifies new susceptibility loci and informs genetic risk prediction.	Prostate cancer	85,554 European ancestry cases, 10,368 African ancestry cases, 8,611 East Asian ancestry cases, 2,714 Hispanic cases, 91,972 European ancestry controls, 10,986 African ancestry controls, 18,809 East Asian ancestry controls, 5,239 Hispanic controls	NA	1q22	NR
chr1	155123836	155123837	rs6676150	Hellwege JN	2019-08-26	Mapping eGFR loci to the renal transcriptome and phenome in the VA Million Veteran Program.	Estimated glomerular filtration rate in non-diabetics	152,624 European ancestry individuals, 36,369 African American individuals	NA	1q22	DPM3
chr1	155126902	155126903	rs140676308	Hernandez Cordero AI	2019-11-21	Genome-wide Associations Reveal Human-Mouse Genetic Convergence and Modifiers of Myogenesis, CPNE1 and STC2.	Appendicular lean mass	181,862 European ancestry elderly individuals	NA	1q22	NR
chr1	155126947	155126948	rs10908458	Chambers JC	2011-10-16	Genome-wide association study identifies loci influencing concentrations of liver enzymes in plasma.	Liver enzyme levels (gamma-glutamyl transferase)	Up to 52,350 European ancestry individuals, up to 8,739 Indian Asian ancestry individuals	NA	1q22	DPM3, EFNA1, PKLR
chr1	155129561	155129562	rs12129003	Chen MH	2020-09-01	Trans-ethnic and Ancestry-Specific Blood-Cell Genetics in 746,667 Individuals from 5 Global Populations.	Platelet count	721,201 African American or Afro-Caribbean, African ancestry, European ancestry, East Asian ancestry, Hispanic or Latin American and South Asian ancestry individuals	NA	1q22	NR
chr1	155130390	155130391	rs4971079	Ellinghaus D	2016-03-14	Analysis of five chronic inflammatory diseases identifies 27 new associations and highlights disease-specific patterns at shared loci.	Chronic inflammatory diseases (ankylosing spondylitis, Crohn's disease, psoriasis, primary sclerosing cholangitis, ulcerative colitis) (pleiotropy)	8,726 European ancestry ankylosing spondylitis cases, 19,085 European ancestry Crohn's disease cases, 6,530 European ancestry psoriasis cases, 3,408 European ancestry primary sclerosing cholangitis cases, 14,513 European ancestry ulcerative colitis cases, 34,213 European ancestry controls	NA	1q22	HMGN2P18	(subset analysis)
chr1	155130797	155130798	rs4440846	Hwang LD	2019-04-21	New insight into human sweet taste: a genome-wide association study of the perception and intake of sweet substances.	Perceived intensity of sucrose	686 European ancestry twins	NA	1q22	KRTCAP2
chr1	155131393	155131394	rs34257409	Casanova F	2019-10-20	A genome-wide association study implicates multiple mechanisms influencing raised urinary albumin-creatinine ratio.	Urinary albumin-to-creatinine ratio	437,027 European ancestry individuals	60,130 individuals	1q22	DPM3, KRTCAP2	(EA)
chr1	155131393	155131394	rs34257409	Teumer A	2019-09-11	Genome-wide association meta-analyses and fine-mapping elucidate pathways influencing albuminuria.	Urinary albumin-to-creatinine ratio	547,361 European ancestry individuals	NA	1q22	KRTCAP2
chr1	155135035	155135036	rs35749011	Nalls MA	2019-12-01	Identification of novel risk loci, causal insights, and heritable risk for Parkinson's disease: a meta-analysis of genome-wide association studies.	Parkinson's disease or first degree relation to individual with Parkinson's disease	15,056 European ancestry cases, 18,618 European ancestry proxy cases, 449,056 European ancestry controls	22,632 European ancestry cases, 968,735 European ancestry controls	1q22	KRTCAP2
chr1	155135035	155135036	rs35749011	Guerreiro R	2018-01-01	Investigating the genetic architecture of dementia with Lewy bodies: a two-stage genome-wide association study.	Dementia with Lewy bodies	1,216 European ancestry cases, 3,791 European ancestry controls	527 European ancestry cases, 663 European ancestry controls	1q22	GBA
chr1	155135035	155135036	rs35749011	Chang D	2017-09-11	A meta-analysis of genome-wide association studies identifies 17 new Parkinson's disease risk loci.	Parkinson's disease	20,184 European ancestry cases, 397,324 European ancestry controls	5,851 European ancestry cases, 5,866 European ancestry controls	1q22	GBA
chr1	155135035	155135036	rs35749011	Nalls MA	2014-07-27	Large-scale meta-analysis of genome-wide association data identifies six new risk loci for Parkinson's disease.	Parkinson's disease	13,708 European ancestry cases, 95,282 European ancestry controls	5,353 European ancestry cases, 5,551 European ancestry controls	1q22	GBA, SYT11
chr1	155135334	155135335	rs4460629	Pirastu N	2021-04-22	Genetic analyses identify widespread sex-differential participation bias.	Biological sex	1,301,549 European ancestry cases, 1,160,583 European ancestry controls	NA	1q22	NA
chr1	155135334	155135335	rs4460629	Corre T	2017-11-01	Genome-Wide Meta-Analysis Unravels Interactions between Magnesium Homeostasis and Metabolic Phenotypes.	Serum magnesium levels	5,265 European ancestry individuals, 1,541 Val Borbera (founder/genetic isolate) individuals, 281 Carlantino (founder/genetic isolate) individuals, 889 Korcula (founder/genetic isolate) individuals	NA	1q22	MUC1
chr1	155137394	155137395	rs141942982	Shrine N	2019-02-25	New genetic signals for lung function highlight pathways and chronic obstructive pulmonary disease associations across multiple ancestries.	Peak expiratory flow	321,047 European ancestry individuals	24,218 European ancestry individuals	1q22	KRTCAP2
chr1	155137394	155137395	rs141942982	Shrine N	2019-02-25	New genetic signals for lung function highlight pathways and chronic obstructive pulmonary disease associations across multiple ancestries.	Lung function (FEV1/FVC)	321,047 European ancestry individuals	79,005 European ancestry individuals	1q22	KRTCAP2
chr1	155137394	155137395	rs141942982	Kichaev G	2018-12-27	Leveraging Polygenic Functional Enrichment to Improve GWAS Power.	Height	approximately 458,000 European ancestry individuals	NA	1q22
chr1	155138841	155138842	rs75925257	van der Meer D	2020-07-14	Understanding the genetic determinants of the brain with MOSTest.	Subcortical volume (min-P)	26,502 European ancestry individuals	NA	1q22	LACTBL1, C1orf234, KDM1A, LUZP1, HTR1D
chr1	155138841	155138842	rs75925257	van der Meer D	2020-07-14	Understanding the genetic determinants of the brain with MOSTest.	Subcortical volume (MOSTest)	26,502 European ancestry individuals	NA	1q22	MACF1, KIAA0754, BMP8A, PABPC4
chr1	155138841	155138842	rs75925257	van der Meer D	2020-07-14	Understanding the genetic determinants of the brain with MOSTest.	Brain morphology (min-P)	26,502 European ancestry individuals	NA	1q22	C1orf210, TIE1, MPL, CDC20, ELOVL1, MED8, SZT2, HYI
chr1	155138841	155138842	rs75925257	van der Meer D	2020-07-14	Understanding the genetic determinants of the brain with MOSTest.	Brain morphology (MOSTest)	26,502 European ancestry individuals	NA	1q22	KCNN3, DCST2, DCST1, ADAM15, EFNA4, EFNA3, EFNA1, SLC50A1, DPM3, KRTCAP2, RP11-201K10.3, TRIM46, MUC1, THBS3, MTX1, GBA, FAM189B, SCAMP3, CLK2, HCN3, PKLR, FDPS, RUSC1, ASH1L, MSTO1, YY1AP1, DAP3, GON4L, SYT11, RIT1, KIAA0907, RXFP4, ARHGEF2, LMNA
chr1	155140647	155140648	rs11264339	van Setten J	2018-07-25	PR interval genome-wide association meta-analysis identifies 50 loci associated with atrial and atrioventricular electrical activity.	PR interval	92,340 European ancestry individuals	NA	1q22	KRTCAP2
chr1	155142882	155142883	rs4971088	Zhao B	2019-11-01	Genome-wide association analysis of 19,629 individuals identifies variants influencing regional brain volumes and refines their genetic co-architecture with cognitive and mental health traits.	Brain region volumes	19,629 British ancestry individuals	NA	1q22	NR	(white matter)
chr1	155142926	155142927	rs4971089	Ferreira MAR	2020-06-30	Age-of-onset information helps identify 76 genetic variants associated with allergic disease.	Allergic disease (asthma, hay fever and/or eczema) (multivariate analysis)	477,968 European ancestry individuals	NA	1q22	KRTCAP2
chr1	155142926	155142927	rs4971089	Ferreira MAR	2020-06-30	Age-of-onset information helps identify 76 genetic variants associated with allergic disease.	Allergic disease (asthma, hay fever and/or eczema) (age of onset)	117,130 European ancestry individuals	NA	1q22	KRTCAP2
chr1	155142926	155142927	rs4971089	Ntalla I	2020-05-21	Multi-ancestry GWAS of the electrocardiographic PR interval identifies 202 loci underlying cardiac conduction.	PR interval	271,570 European ancestry individuals, 8,173 African American individuals, 12,823 Hispanic/Latino individuals	NA	1q22	KRTCAP2
chr1	155143767	155143768	rs4971091	Rask-Andersen M	2019-01-21	Genome-wide association study of body fat distribution identifies adiposity loci and sex-specific genetic effects.	Body fat distribution (arm fat ratio)	55,006 British ancestry males, 61,132 British ancestry females	112,425 British ancestry males, 133,936 British ancestry females	1q22	KRTCAP2	(females)
chr1	155143767	155143768	rs4971091	Rask-Andersen M	2019-01-21	Genome-wide association study of body fat distribution identifies adiposity loci and sex-specific genetic effects.	Body fat distribution (arm fat ratio)	55,006 British ancestry males, 61,132 British ancestry females	112,425 British ancestry males, 133,936 British ancestry females	1q22	KRTCAP2
chr1	155143945	155143946	rs4971092	Ishigaki K	2020-06-08	Large-scale genome-wide association study in a Japanese population identifies novel susceptibility loci across different diseases.	Gastric cancer	6,563 Japanese ancestry cases, 195,745 Japanese ancestry controls	NA	1q22
chr1	155148780	155148781	rs4971059	Michailidou K	2017-10-23	Association analysis identifies 65 new breast cancer risk loci.	Breast cancer	76,192 European ancestry cases, 63,082 European ancestry controls	46,785 European ancestry cases, 42,892 European ancestry controls, 14,068 East Asian ancestry cases, 13,104 East Asian ancestry controls	1q22	TRIM46	(EA)
chr1	155151492	155151493	rs11264341	Boocock J	2020-01-27	Genomic dissection of 43 serum urate-associated loci provides multiple insights into molecular mechanisms of urate control.	Urate levels	110,238 European ancestry individuals, 21,471 East Asian individuals	NA	1q22	TRIM46
chr1	155151492	155151493	rs11264341	Nakatochi M	2019-04-08	Genome-wide meta-analysis identifies multiple novel loci associated with serum uric acid levels in Japanese individuals.	Serum uric acid levels	121,745 Japanese ancestry individuals	at least 101,293 European ancestry individuals	1q22	TRIM46	(Japanese)
chr1	155151492	155151493	rs11264341	Kichaev G	2018-12-27	Leveraging Polygenic Functional Enrichment to Improve GWAS Power.	Lung function (FVC)	approximately 372,000 European ancestry individuals	NA	1q22
chr1	155151492	155151493	rs11264341	Kottgen A	2012-12-23	Genome-wide association analyses identify 18 new loci associated with serum urate concentrations.	Urate levels	49,825 European ancestry males, 60,522 European ancestry females	Up to 32,813 European ancestry individuals	1q22	TRIM46, PKLR
chr1	155153536	155153537	rs111508230	Pei YF	2020-10-23	The genetic architecture of appendicular lean mass characterized by association analysis in the UK Biobank study.	Appendicular lean mass	450,243 European ancestry individuals	NA	1q22	NR
chr1	155153536	155153537	rs111508230	Hernandez Cordero AI	2019-11-21	Genome-wide Associations Reveal Human-Mouse Genetic Convergence and Modifiers of Myogenesis, CPNE1 and STC2.	Appendicular lean mass	85,750 European ancestry middle-aged adult individuals	NA	1q22	NR
chr1	155155607	155155608	rs4971099	Shungin D	2019-06-24	Genome-wide analysis of dental caries and periodontitis combining clinical and self-reported data.	Number of decayed, missing and filled tooth surfaces or use of dentures	14,976 European ancestry individuals with decayed, missing or filled tooth surface measurement, 11,816 Hispanic/Latino individuals with decayed, missing or filled tooth surface measurement, 77,714 European ancestry dentures cases, 383,317 European ancestry controls	NA	1q22	KRTCAP2
chr1	155155607	155155608	rs4971099	Shungin D	2019-06-24	Genome-wide analysis of dental caries and periodontitis combining clinical and self-reported data.	Dentures	77,714 European ancestry cases, 383,317 European ancestry controls	NA	1q22	KRTCAP2
chr1	155155730	155155731	rs4971100	Gill D	2020-12-28	Urate, Blood Pressure, and Cardiovascular Disease: Evidence From Mendelian Randomization and Meta-Analysis of Clinical Trials.	Urate levels	454,183 European ancestry individuals	NA	1q22	NR
chr1	155155730	155155731	rs4971100	Milne S	2020-08-24	Protective effect of club cell secretory protein (CC-16) on COPD risk and progression: a Mendelian randomisation study.	Serum CC16 levels	5,552 individuals	NA	1q22	TRIM46
chr1	155155730	155155731	rs4971100	Wuttke M	2019-05-31	A catalog of genetic loci associated with kidney function from analyses of a million individuals.	Estimated glomerular filtration rate	567,460 European ancestry individuals, 165,726 East Asian ancestry individuals, 13,842 African American individuals, 13,359 South Asian ancestry individuals, 4,961 Hispanic individuals	216,518 European ancestry individuals, 64,204 non-Hispanic black individuals	1q22	TRIM46
chr1	155155730	155155731	rs4971100	Wuttke M	2019-05-31	A catalog of genetic loci associated with kidney function from analyses of a million individuals.	Estimated glomerular filtration rate	165,726 East Asian ancestry individuals	NA	1q22	TRIM46
chr1	155155730	155155731	rs4971100	Nakatochi M	2019-04-08	Genome-wide meta-analysis identifies multiple novel loci associated with serum uric acid levels in Japanese individuals.	Serum uric acid levels	121,745 Japanese ancestry individuals, at least 88,461 European ancestry individuals	NA	1q22	TRIM46	(Japanese)
chr1	155155730	155155731	rs4971100	Nakatochi M	2019-04-08	Genome-wide meta-analysis identifies multiple novel loci associated with serum uric acid levels in Japanese individuals.	Serum uric acid levels	121,745 Japanese ancestry individuals, at least 88,461 European ancestry individuals	NA	1q22	TRIM46	(EA)
chr1	155155730	155155731	rs4971100	Chang X	2015-04-17	Genome-wide association study of serum minerals levels in children of different ethnic background.	Magnesium levels	2,317 European ancestry children, 1,283 African American ancestry children	NA	1q22	MUC1	(EA)
chr1	155155730	155155731	rs4971100	Chang X	2015-04-17	Genome-wide association study of serum minerals levels in children of different ethnic background.	Magnesium levels	2,317 European ancestry children, 1,283 African American ancestry children	NA	1q22	MUC1
chr1	155157714	155157715	rs2070803	Tin A	2019-10-02	Target genes, variants, tissues and transcriptional pathways influencing human serum urate levels.	Urate levels	288,649 European ancestry individuals, 125,725 East Asian ancestry individuals, 33,671 African American individuals, 9,037 South Asian ancestry individuals, 608 Hispanic individuals	NA	1q22	TRIM46
chr1	155157714	155157715	rs2070803	Tin A	2019-10-02	Target genes, variants, tissues and transcriptional pathways influencing human serum urate levels.	Urate levels	288,649 European ancestry individuals	NA	1q22	TRIM46
chr1	155157714	155157715	rs2070803	Tin A	2019-10-02	Target genes, variants, tissues and transcriptional pathways influencing human serum urate levels.	Urate levels	174,111 European, East Asian, African American, South Asian and Hispanic ancestry men, 172,102 European, East Asian, African American, South Asian and Hispanic ancestry women	NA	1q22	NR	(men)
chr1	155157714	155157715	rs2070803	Tin A	2019-10-02	Target genes, variants, tissues and transcriptional pathways influencing human serum urate levels.	Urate levels	174,111 European, East Asian, African American, South Asian and Hispanic ancestry men, 172,102 European, East Asian, African American, South Asian and Hispanic ancestry women	NA	1q22	NR	(women)
chr1	155157714	155157715	rs2070803	Tin A	2019-10-02	Target genes, variants, tissues and transcriptional pathways influencing human serum urate levels.	Gout	13,179 European, African American and unknown ancestry cases, 750,634 European, African American and unknown ancestry controls	NA	1q22	MUC1	(EA)
chr1	155157714	155157715	rs2070803	Teumer A	2019-09-11	Genome-wide association meta-analyses and fine-mapping elucidate pathways influencing albuminuria.	Urinary albumin-to-creatinine ratio	547,361 European ancestry individuals, 6,795 African American individuals, 6,324 East Asian ancestry individuals, 2,335 South Asian ancestry individuals, 1,442 Hispanic individuals	NA	1q22	TRIM46
chr1	155157714	155157715	rs2070803	Teumer A	2019-09-11	Genome-wide association meta-analyses and fine-mapping elucidate pathways influencing albuminuria.	Microalbuminuria	51,861 European, African American, East Asian, South Asian or Hispanic ancestry cases, 297,093 European, African American, East Asian, South Asian or Hispanic ancestry controls	NA	1q22	TRIM46
chr1	155157714	155157715	rs2070803	Morris AP	2019-01-03	Trans-ethnic kidney function association study reveals putative causal genes and effects on kidney-specific disease aetiologies.	Estimated glomerular filtration rate	134,070 European ancestry individuals, 143,658 East Asian ancestry individuals, 26,344 Hispanic or Latino ancestry individuals, 8,224 African American individuals	NA	1q22	GBAP1
chr1	155161793	155161794	rs147048677	Wu Y	2021-02-19	GWAS of peptic ulcer disease implicates Helicobacter pylori infection, other gastrointestinal disorders and depression.	Peptic ulcer disease	16,666 European ancestry cases, 439,661 European ancestry controls	NA	1q22	NR
chr1	155162066	155162067	rs4072037	Nakatochi M	2019-04-08	Genome-wide meta-analysis identifies multiple novel loci associated with serum uric acid levels in Japanese individuals.	Serum uric acid levels	121,745 Japanese ancestry individuals	at least 101,293 European ancestry individuals	1q22	MUC1	(Japanese)
chr1	155162066	155162067	rs4072037	Takeuchi F	2018-11-28	Interethnic analyses of blood pressure loci in populations of East Asian and European descent.	Diastolic blood pressure	130,777 Japanese ancestry individuals	53,008 East Asian individuals, 105,253 European ancestry individuals	1q22	NR	(East Asian)
chr1	155162066	155162067	rs4072037	Kanai M	2018-02-05	Genetic analysis of quantitative traits in the Japanese population links cell types to complex human diseases.	Serum uric acid levels	109,029 Japanese ancestry individuals	NA	1q22	MUC1
chr1	155162066	155162067	rs4072037	Wang Z	2015-12-23	Identification of new susceptibility loci for gastric non-cardia adenocarcinoma: pooled results from two Chinese genome-wide association studies.	Non-cardia gastric cancer	2,031 Han Chinese ancestry cases, 4,970 Han Chinese ancestry controls	3,564 Han Chinese ancestry cases, 4,637 Han Chinese ancestry controls	1q22	MUC1
chr1	155162066	155162067	rs4072037	Teumer A	2015-12-02	Genome-wide Association Studies Identify Genetic Loci Associated With Albuminuria in Diabetes.	Urinary albumin-to-creatinine ratio in non-diabetics	up to 46,051 European ancestry individuals	NA	1q22	MUC1, MIR92B, THBS3, TRIM46, KRTC
chr1	155162066	155162067	rs4072037	Teumer A	2015-12-02	Genome-wide Association Studies Identify Genetic Loci Associated With Albuminuria in Diabetes.	Urinary albumin-to-creatinine ratio	up to 54,450 European ancestry individuals	NA	1q22	MUC1
chr1	155162066	155162067	rs4072037	Hu N	2015-06-30	Genome-wide association study of gastric adenocarcinoma in Asia: a comparison of associations between cardia and non-cardia tumours.	Gastric cancer	2,350 East Asian ancestry cases, 2,708 East Asian ancestry controls	7,408 East Asian ancestry cases, 7,548 East Asian ancestry controls	1q22	MUC1
chr1	155162066	155162067	rs4072037	Tin A	2015-05-29	Genetic loci for serum magnesium among African-Americans and gene-environment interaction at MUC1 and TRPM6 in European-Americans: the Atherosclerosis Risk in Communities (ARIC) study.	Magnesium levels	2,737 African American individuals	942 African American individuals	1q22	MUC1
chr1	155162066	155162067	rs4072037	Abnet CC	2010-08-22	A shared susceptibility locus in PLCE1 at 10q23 for gastric adenocarcinoma and esophageal squamous cell carcinoma.	Esophageal cancer and gastric cancer	1,625 Chinese ancestry gastric cancer cases, 1,898 Chinese ancestry ESCC cases, 2,100 Chinese ancestry controls	NA	1q22	NR	(Total gastric)
chr1	155162066	155162067	rs4072037	Meyer TE	2010-08-05	Genome-wide association studies of serum magnesium, potassium, and sodium concentrations identify six Loci influencing serum magnesium levels.	Magnesium levels	15,366 European ancestry individuals	8,463 European ancestry individuals	1q22	MUC1
chr1	155164479	155164480	rs12411216	van der Lee SJ	2019-08-02	A genome-wide association study identifies genetic loci associated with specific lobar brain volumes.	Occipital lobe volume	15,269 European ancestry individuals, 405 African American individuals, 211 Chinese ancestry individuals, 131 Malay ancestry individuals	NA	1q22	MIR92B, THBS3
chr1	155164479	155164480	rs12411216	Kim SK	2018-07-26	Identification of 613 new loci associated with heel bone mineral density and a polygenic risk score for bone mineral density, osteoporosis and fracture.	Heel bone mineral density	394,929 European ancestry individuals	NA	1q22
chr1	155167785	155167786	rs41264915	Olafsson S	2019-10-30	Common and rare sequence variants influencing tumor biomarkers in blood.	Serum cancer antigen 15.3 levels	7,107 Icelandic ancestry individuals	NA	1q22	THBS3
chr1	155167785	155167786	rs41264915	Kichaev G	2018-12-27	Leveraging Polygenic Functional Enrichment to Improve GWAS Power.	Lung function (FEV1/FVC)	approximately 370,000 European ancestry individuals	NA	1q22
chr1	155169200	155169201	rs11355526	Vuckovic D	2020-09-01	The Polygenic and Monogenic Basis of Blood Traits and Diseases.	Mean corpuscular hemoglobin concentration	408,112 British individuals	NA	1q22	THBS3, RP11-263K19.4
chr1	155175088	155175089	rs72704117	Zhu Z	2019-10-24	Shared Genetic and Experimental Links between Obesity-Related Traits and Asthma Subtypes in UK Biobank.	Waist circumference adjusted for body mass index	457,690 European ancestry individuals	NA	1q22	NR
chr1	155175088	155175089	rs72704117	Olafsson S	2019-10-30	Common and rare sequence variants influencing tumor biomarkers in blood.	Serum cancer antigen 15.3 levels	7,107 Icelandic ancestry individuals	NA	1q22	THBS3
chr1	155175389	155175390	rs370545	Chen MH	2020-09-01	Trans-ethnic and Ancestry-Specific Blood-Cell Genetics in 746,667 Individuals from 5 Global Populations.	Mean corpuscular hemoglobin concentration	642,173 African American or Afro-Caribbean, African ancestry, European ancestry, East Asian ancestry, Hispanic or Latin American and South Asian ancestry individuals	NA	1q22	NR
chr1	155175389	155175390	rs370545	Chen MH	2020-09-01	Trans-ethnic and Ancestry-Specific Blood-Cell Genetics in 746,667 Individuals from 5 Global Populations.	Mean corpuscular hemoglobin concentration	491,553 European ancestry individuals	NA	1q22	NR
chr1	155175891	155175892	rs914615	Thio CHL	2019-02-26	Genome-Wide Association Scan of Serum Urea in European Populations Identifies Two Novel Loci.	Serum urea levels	13,312 European ancestry individuals	7,379 European ancestry individuals	1q22	THBS3
chr1	155175891	155175892	rs914615	Morris JA	2018-12-31	An atlas of genetic influences on osteoporosis in humans and mice.	Heel bone mineral density	426,824 British ancestry individuals	NA	1q22	THBS3
chr1	155175891	155175892	rs914615	Kichaev G	2018-12-27	Leveraging Polygenic Functional Enrichment to Improve GWAS Power.	Heel bone mineral density	approximately 446,000 European ancestry individuals	NA	1q22
chr1	155175891	155175892	rs914615	Teumer A	2015-12-02	Genome-wide Association Studies Identify Genetic Loci Associated With Albuminuria in Diabetes.	Urinary albumin-to-creatinine ratio	up to 54,450 European ancestry individuals	NA	1q22	THBS3
chr1	155178781	155178782	rs760077	Folkersen L	2020-10-16	Genomic and drug target evaluation of 90 cardiovascular proteins in 30,931 individuals.	P-selectin glycoprotein ligand 1 levels	21,758 European ancestry individuals	9,173 individuals	1q22
chr1	155178781	155178782	rs760077	Vuckovic D	2020-09-01	The Polygenic and Monogenic Basis of Blood Traits and Diseases.	Red blood cell count	408,112 British individuals	NA	1q22	MTX1
chr1	155178781	155178782	rs760077	Vuckovic D	2020-09-01	The Polygenic and Monogenic Basis of Blood Traits and Diseases.	Hemoglobin	408,112 British individuals	NA	1q22	MTX1
chr1	155178781	155178782	rs760077	Vuckovic D	2020-09-01	The Polygenic and Monogenic Basis of Blood Traits and Diseases.	Hematocrit	408,112 British individuals	NA	1q22	MTX1
chr1	155178781	155178782	rs760077	Chen MH	2020-09-01	Trans-ethnic and Ancestry-Specific Blood-Cell Genetics in 746,667 Individuals from 5 Global Populations.	Red blood cell count	727,624 African American or Afro-Caribbean, African ancestry, European ancestry, East Asian ancestry, Hispanic or Latin American and South Asian ancestry individuals	NA	1q22	NR
chr1	155178781	155178782	rs760077	Chen MH	2020-09-01	Trans-ethnic and Ancestry-Specific Blood-Cell Genetics in 746,667 Individuals from 5 Global Populations.	Red blood cell count	545,203 European ancestry individuals	NA	1q22	NR
chr1	155178781	155178782	rs760077	Chen MH	2020-09-01	Trans-ethnic and Ancestry-Specific Blood-Cell Genetics in 746,667 Individuals from 5 Global Populations.	Hemoglobin concentration	746,431 African American or Afro-Caribbean, African ancestry, European ancestry, East Asian ancestry, Hispanic or Latin American and South Asian ancestry individuals	NA	1q22	NR
chr1	155178781	155178782	rs760077	Chen MH	2020-09-01	Trans-ethnic and Ancestry-Specific Blood-Cell Genetics in 746,667 Individuals from 5 Global Populations.	Hemoglobin concentration	563,946 European ancestry individuals	NA	1q22	NR
chr1	155178781	155178782	rs760077	Chen MH	2020-09-01	Trans-ethnic and Ancestry-Specific Blood-Cell Genetics in 746,667 Individuals from 5 Global Populations.	Hematocrit	737,823 African American or Afro-Caribbean, African ancestry, European ancestry, East Asian ancestry, Hispanic or Latin American and South Asian ancestry individuals	NA	1q22	NR
chr1	155178781	155178782	rs760077	Chen MH	2020-09-01	Trans-ethnic and Ancestry-Specific Blood-Cell Genetics in 746,667 Individuals from 5 Global Populations.	Hematocrit	562,259 European ancestry individuals	NA	1q22	NR
chr1	155178781	155178782	rs760077	Ishigaki K	2020-06-08	Large-scale genome-wide association study in a Japanese population identifies novel susceptibility loci across different diseases.	Gastric cancer	6,563 Japanese ancestry cases, 195,745 Japanese ancestry controls	NA	1q22
chr1	155178781	155178782	rs760077	Oskarsson GR	2020-04-23	Predicted loss and gain of function mutations in ACO1 are associated with erythropoiesis.	Hemoglobin levels	684,122 European ancestry individuals	NA	1q22	MTX1
chr1	155178781	155178782	rs760077	Olafsson S	2019-10-30	Common and rare sequence variants influencing tumor biomarkers in blood.	Serum cancer antigen 15.3 levels	7,107 Icelandic ancestry individuals	NA	1q22	MTX1
chr1	155178781	155178782	rs760077	Tin A	2019-10-02	Target genes, variants, tissues and transcriptional pathways influencing human serum urate levels.	Urate levels	288,649 European ancestry individuals, 125,725 East Asian ancestry individuals, 33,671 African American individuals, 9,037 South Asian ancestry individuals, 608 Hispanic individuals	NA	1q22	MTX1	(East Asian)
chr1	155178781	155178782	rs760077	Hellwege JN	2019-08-26	Mapping eGFR loci to the renal transcriptome and phenome in the VA Million Veteran Program.	Estimated glomerular filtration rate	70,762 European ancestry diabetic individuals, 152,624 European ancestry non-diabetic individuals, 20,967 African American diabetic individuals, 36,369 African American non-diabetic individuals	567,401 European ancestry individuals, 165,726 East Asian ancestry individuals, 13,359 South Asian ancestry individuals, 13,842 African American ancestry individuals, 4,961 Hispanic ancestry individuals	1q22	MTX1
chr1	155178781	155178782	rs760077	Yan C	2019-08-05	Meta-analysis of genome-wide association studies and functional assays decipher susceptibility genes for gastric cancer in Chinese populations.	Gastric cancer	3,771 Chinese ancestry cases, 5,426 Chinese ancestry controls	7,035 Chinese ancestry cases, 8,323 Chinese ancestry controls	1q22	MUC1
chr1	155178781	155178782	rs760077	Wuttke M	2019-05-31	A catalog of genetic loci associated with kidney function from analyses of a million individuals.	Blood urea nitrogen levels	416,178 European and unknown ancestry individuals	NA	1q22	MTX1
chr1	155178781	155178782	rs760077	Karlsson Linner R	2019-01-14	Genome-wide association analyses of risk tolerance and risky behaviors in over 1 million individuals identify hundreds of loci and shared genetic influences.	General risk tolerance (MTAG)	975,353 European ancestry individuals	NA	1q22	MTX1
chr1	155178781	155178782	rs760077	Kichaev G	2018-12-27	Leveraging Polygenic Functional Enrichment to Improve GWAS Power.	Red blood cell count	approximately 445,000 European ancestry individuals	NA	1q22
chr1	155178781	155178782	rs760077	Nagy R	2017-03-07	Exploration of haplotype research consortium imputation for genome-wide association studies in 20,032 Generation Scotland participants.	Urea levels	19,293 British ancestry individuals from 6863 families.	NA	1q22	MTX1
chr1	155178781	155178782	rs760077	Astle WJ	2016-11-17	The Allelic Landscape of Human Blood Cell Trait Variation and Links to Common Complex Disease.	Red blood cell count	172,952 European ancestry individuals	NA	1q22	MTX1
chr1	155178781	155178782	rs760077	Astle WJ	2016-11-17	The Allelic Landscape of Human Blood Cell Trait Variation and Links to Common Complex Disease.	Hemoglobin concentration	172,925 European ancestry individuals	NA	1q22	MTX1
chr1	155178781	155178782	rs760077	Astle WJ	2016-11-17	The Allelic Landscape of Human Blood Cell Trait Variation and Links to Common Complex Disease.	Hematocrit	173,039 European ancestry individuals	NA	1q22	MTX1
chr1	155181842	155181843	rs2974935	Fehringer G	2016-04-20	Cross-Cancer Genome-Wide Analysis of Lung, Ovary, Breast, Prostate, and Colorectal Cancer Reveals Novel Pleiotropic Associations.	Cancer	5,020 European ancestry lung cancer cases, 3,718 European ancestry lung adenocarcinoma cases, 3,422 European ancestry lung squamous cell carcinoma cases, 15,414 European ancestry colorectal cancer cases, 10,809 European ancestry breast cancer cases, 4,939 European ancestry estrogen receptor negative breast cancer cases, 1,098 European ancestry ovarian cancer cases, 2,556 European ancestry serous …	NA	1q22	MTX1
chr1	155182163	155182164	rs2075570	Fehringer G	2016-04-20	Cross-Cancer Genome-Wide Analysis of Lung, Ovary, Breast, Prostate, and Colorectal Cancer Reveals Novel Pleiotropic Associations.	Cancer (pleiotropy)	5,020 European ancestry lung cancer cases, 3,718 European ancestry lung adenocarcinoma cases, 3,422 European ancestry lung squamous cell carcinoma cases, 15,414 European ancestry colorectal cancer cases, 10,809 European ancestry breast cancer cases, 4,939 European ancestry estrogen receptor negative breast cancer cases, 1,098 European ancestry ovarian cancer cases, 2,556 European ancestry serous …	NA	1q22	MTX1	(subset analysis)
chr1	155184974	155184975	rs2990223	Chen MH	2020-09-01	Trans-ethnic and Ancestry-Specific Blood-Cell Genetics in 746,667 Individuals from 5 Global Populations.	Red cell distribution width	531,774 European ancestry individuals	NA	1q22	NR
chr1	155184974	155184975	rs2990223	Graham SE	2019-04-23	Sex-specific and pleiotropic effects underlying kidney function identified from GWAS meta-analysis.	Estimated glomerular filtration rate	206,856 European ancestry individuals, 143,658 East Asian ancestry individuals	NA	1q22	MTX1, MUC1
chr1	155186741	155186742	rs1057941	Tanikawa C	2018-10-03	A GWAS identifies gastric cancer susceptibility loci at 12q24.11-12 and 20q11.21.	Gastric cancer	6,171 Japanese ancestry cases, 27,178 Japanese ancestry controls	5,336 Japanese ancestry cases, 11,726 Japanese ancestry controls	1q22	NR
chr1	155186741	155186742	rs1057941	Fehringer G	2016-04-20	Cross-Cancer Genome-Wide Analysis of Lung, Ovary, Breast, Prostate, and Colorectal Cancer Reveals Novel Pleiotropic Associations.	Cancer	5,020 European ancestry lung cancer cases, 3,718 European ancestry lung adenocarcinoma cases, 3,422 European ancestry lung squamous cell carcinoma cases, 15,414 European ancestry colorectal cancer cases, 10,809 European ancestry breast cancer cases, 4,939 European ancestry estrogen receptor negative breast cancer cases, 1,098 European ancestry ovarian cancer cases, 2,556 European ancestry serous …	NA	1q22	GBAP1
chr1	155190253	155190254	rs2990220	Takeuchi F	2018-11-28	Interethnic analyses of blood pressure loci in populations of East Asian and European descent.	Systolic blood pressure	130,777 Japanese ancestry individuals	53,008 East Asian individuals, 105,253 European ancestry individuals	1q22	NR	(East Asian)
chr1	155190253	155190254	rs2990220	Takeuchi F	2018-11-28	Interethnic analyses of blood pressure loci in populations of East Asian and European descent.	Mean arterial pressure	130,777 Japanese ancestry individuals	53,008 East Asian individuals, 105,253 European ancestry individuals	1q22	NR	(East Asian)
chr1	155190253	155190254	rs2990220	Takeuchi F	2018-11-28	Interethnic analyses of blood pressure loci in populations of East Asian and European descent.	Diastolic blood pressure	130,777 Japanese ancestry individuals	53,008 East Asian individuals, 105,253 European ancestry individuals	1q22	NR	(East Asian)
chr1	155194014	155194015	rs78973538	Ellinghaus D	2016-03-14	Analysis of five chronic inflammatory diseases identifies 27 new associations and highlights disease-specific patterns at shared loci.	Chronic inflammatory diseases (ankylosing spondylitis, Crohn's disease, psoriasis, primary sclerosing cholangitis, ulcerative colitis) (pleiotropy)	8,726 European ancestry ankylosing spondylitis cases, 19,085 European ancestry Crohn's disease cases, 6,530 European ancestry psoriasis cases, 3,408 European ancestry primary sclerosing cholangitis cases, 14,513 European ancestry ulcerative colitis cases, 34,213 European ancestry controls	NA	1q22	GBAP1	(subset analysis)
chr1	155194979	155194980	rs2049805	Okada Y	2012-07-15	Meta-analysis identifies multiple loci associated with kidney function-related traits in east Asian populations.	Renal function-related traits (BUN)	39,717 East Asian ancestry individuals	17,461 East Asian ancestry individuals	1q22	MTX1, GBA
chr1	155197267	155197268	rs2974929	Kanai M	2018-02-05	Genetic analysis of quantitative traits in the Japanese population links cell types to complex human diseases.	Blood urea nitrogen levels	139,818 Japanese ancestry individuals	NA	1q22	GBAP1
chr1	155197461	155197462	rs2990245	Zhao B	2019-11-01	Genome-wide association analysis of 19,629 individuals identifies variants influencing regional brain volumes and refines their genetic co-architecture with cognitive and mental health traits.	Brain region volumes	19,629 British ancestry individuals	NA	1q22	NR	(white matter)
chr1	155197601	155197602	rs2990246	Kanai M	2018-02-05	Genetic analysis of quantitative traits in the Japanese population links cell types to complex human diseases.	Glomerular filtration rate	143,658 Japanese ancestry individuals	NA	1q22	GBAP1
chr1	155197601	155197602	rs2990246	Kanai M	2018-02-05	Genetic analysis of quantitative traits in the Japanese population links cell types to complex human diseases.	Creatinine levels	142,097 Japanese ancestry individuals	NA	1q22	GBAP1
chr1	155204792	155204793	rs75822236	Hong EP	2019-02-25	Genomic Variations in Susceptibility to Intracranial Aneurysm in the Korean Population.	Intracranial aneurysm	250 Korean ancestry cases, 296 Korean ancestry controls	NA	1q22	GBA
chr1	155205633	155205634	rs76763715	Nalls MA	2019-12-01	Identification of novel risk loci, causal insights, and heritable risk for Parkinson's disease: a meta-analysis of genome-wide association studies.	Parkinson's disease or first degree relation to individual with Parkinson's disease	15,056 European ancestry cases, 18,618 European ancestry proxy cases, 449,056 European ancestry controls	22,632 European ancestry cases, 968,735 European ancestry controls	1q22	GBAP1
chr1	155206166	155206167	rs2230288	Pickrell JK	2016-05-16	Detection and interpretation of shared genetic influences on 42 human traits.	Parkinson's disease	9,619 European ancestry cases, 324,522 European ancestry controls	NA	1q22	GBA
chr1	155218364	155218365	rs734073	Karlsson Linner R	2019-01-14	Genome-wide association analyses of risk tolerance and risky behaviors in over 1 million individuals identify hundreds of loci and shared genetic influences.	Adventurousness	557,923 European ancestry individuals	NA	1q22	FAM189B
chr1	155230705	155230706	rs60762712	Vuckovic D	2020-09-01	The Polygenic and Monogenic Basis of Blood Traits and Diseases.	Red cell distribution width	408,112 British individuals	NA	1q22	SCAMP3
chr1	155256230	155256231	rs12724449	Kichaev G	2018-12-27	Leveraging Polygenic Functional Enrichment to Improve GWAS Power.	Red cell distribution width	approximately 445,000 European ancestry individuals	NA	1q22
chr1	155260381	155260382	rs61755431	Vuckovic D	2020-09-01	The Polygenic and Monogenic Basis of Blood Traits and Diseases.	Reticulocyte fraction of red cells	408,112 British individuals	NA	1q22	PKLR
chr1	155260381	155260382	rs61755431	Auer PL	2014-04-28	Rare and low-frequency coding variants in CXCR2 and other genes are associated with hematological traits.	Hemoglobin levels	24,814 European ancestry individuals	6,526 European ancestry individuals	1q22	PKLR
chr1	155261635	155261636	rs113403872	Vuckovic D	2020-09-01	The Polygenic and Monogenic Basis of Blood Traits and Diseases.	Red blood cell count	408,112 British individuals	NA	1q22	PKLR
chr1	155261635	155261636	rs113403872	Vuckovic D	2020-09-01	The Polygenic and Monogenic Basis of Blood Traits and Diseases.	Hemoglobin	408,112 British individuals	NA	1q22	PKLR
chr1	155261635	155261636	rs113403872	Vuckovic D	2020-09-01	The Polygenic and Monogenic Basis of Blood Traits and Diseases.	Hematocrit	408,112 British individuals	NA	1q22	PKLR
chr1	155261708	155261709	rs116100695	Vuckovic D	2020-09-01	The Polygenic and Monogenic Basis of Blood Traits and Diseases.	Reticulocyte fraction of red cells	408,112 British individuals	NA	1q22	PKLR
chr1	155261708	155261709	rs116100695	Vuckovic D	2020-09-01	The Polygenic and Monogenic Basis of Blood Traits and Diseases.	Reticulocyte count	408,112 British individuals	NA	1q22	PKLR
chr1	155261708	155261709	rs116100695	Vuckovic D	2020-09-01	The Polygenic and Monogenic Basis of Blood Traits and Diseases.	Red blood cell count	408,112 British individuals	NA	1q22	PKLR
chr1	155261708	155261709	rs116100695	Vuckovic D	2020-09-01	The Polygenic and Monogenic Basis of Blood Traits and Diseases.	Immature fraction of reticulocytes	408,112 British individuals	NA	1q22	PKLR
chr1	155261708	155261709	rs116100695	Vuckovic D	2020-09-01	The Polygenic and Monogenic Basis of Blood Traits and Diseases.	High light scatter reticulocyte percentage of red cells	408,112 British individuals	NA	1q22	PKLR
chr1	155261708	155261709	rs116100695	Vuckovic D	2020-09-01	The Polygenic and Monogenic Basis of Blood Traits and Diseases.	High light scatter reticulocyte count	408,112 British individuals	NA	1q22	PKLR
chr1	155261708	155261709	rs116100695	Vuckovic D	2020-09-01	The Polygenic and Monogenic Basis of Blood Traits and Diseases.	Hemoglobin	408,112 British individuals	NA	1q22	PKLR
chr1	155261708	155261709	rs116100695	Vuckovic D	2020-09-01	The Polygenic and Monogenic Basis of Blood Traits and Diseases.	Hematocrit	408,112 British individuals	NA	1q22	PKLR
chr1	155261708	155261709	rs116100695	Astle WJ	2016-11-17	The Allelic Landscape of Human Blood Cell Trait Variation and Links to Common Complex Disease.	Reticulocyte fraction of red cells	170,690 European ancestry individuals	NA	1q22	PKLR
chr1	155261708	155261709	rs116100695	Astle WJ	2016-11-17	The Allelic Landscape of Human Blood Cell Trait Variation and Links to Common Complex Disease.	Reticulocyte count	170,641 European ancestry individuals	NA	1q22	PKLR
chr1	155261708	155261709	rs116100695	Astle WJ	2016-11-17	The Allelic Landscape of Human Blood Cell Trait Variation and Links to Common Complex Disease.	High light scatter reticulocyte percentage of red cells	170,763 European ancestry individuals	NA	1q22	PKLR
chr1	155261708	155261709	rs116100695	Astle WJ	2016-11-17	The Allelic Landscape of Human Blood Cell Trait Variation and Links to Common Complex Disease.	High light scatter reticulocyte count	170,761 European ancestry individuals	NA	1q22	PKLR
chr1	155266608	155266609	rs115736167	Hall LS	2018-01-10	Genome-wide meta-analyses of stratified depression in Generation Scotland and UK Biobank.	Major depressive disorder	6,997 European ancestry female cases, 16,172 European ancestry female controls, 3,852 European ancestry male cases, 16,034 European ancestry male controls	NA	1q22	PKLR	(males)
chr1	155268130	155268131	rs180921974	Hernandez Cordero AI	2019-11-21	Genome-wide Associations Reveal Human-Mouse Genetic Convergence and Modifiers of Myogenesis, CPNE1 and STC2.	Appendicular lean mass	181,862 European ancestry elderly individuals	NA	1q22	NR
chr1	155268130	155268131	rs180921974	Rask-Andersen M	2019-01-21	Genome-wide association study of body fat distribution identifies adiposity loci and sex-specific genetic effects.	Body fat distribution (trunk fat ratio)	55,006 British ancestry males, 61,132 British ancestry females	112,425 British ancestry males, 133,936 British ancestry females	1q22	ADAM15, ARHGEF2, ASH1L, C1orf2, C1orf104, CKS1B, CLK2, DAP3, DCST1, DCST2, DPM3, EFNA1, EFNA3, EFNA4, FDPS, FLAD1, GBA, GON4L, HCN3, KIAA0907, KRTCAP2, LENEP, MAPBPIP, MSTO1, MTX1, MUC1, PBXIP1, PKLR, PMVK, PYGO2, RAG1AP1, RIT1, RUSC1, RXFP4, SCAMP3, SHC1, SSR2, SYT11, THBS3, TRIM46, UBQLN4, YY1AP1, ZBTB7B
chr1	155268130	155268131	rs180921974	Rask-Andersen M	2019-01-21	Genome-wide association study of body fat distribution identifies adiposity loci and sex-specific genetic effects.	Body fat distribution (trunk fat ratio)	55,006 British ancestry males, 61,132 British ancestry females	112,425 British ancestry males, 133,936 British ancestry females	1q22	ADAM15, ARHGEF2, ASH1L, C1orf2, C1orf104, CKS1B, CLK2, DAP3, DCST1, DCST2, DPM3, EFNA1, EFNA3, EFNA4, FDPS, FLAD1, GBA, GON4L, HCN3, KIAA0907, KRTCAP2, LENEP, MAPBPIP, MSTO1, MTX1, MUC1, PBXIP1, PKLR, PMVK, PYGO2, RAG1AP1, RIT1, RUSC1, RXFP4, SCAMP3, SHC1, SSR2, SYT11, THBS3, TRIM46, UBQLN4, YY1AP1, ZBTB7B	(females)
chr1	155268130	155268131	rs180921974	Rask-Andersen M	2019-01-21	Genome-wide association study of body fat distribution identifies adiposity loci and sex-specific genetic effects.	Body fat distribution (trunk fat ratio)	55,006 British ancestry males, 61,132 British ancestry females	112,425 British ancestry males, 133,936 British ancestry females	1q22	ADAM15, ARHGEF2, ASH1L, C1orf2, C1orf104, CKS1B, CLK2, DAP3, DCST1, DCST2, DPM3, EFNA1, EFNA3, EFNA4, FDPS, FLAD1, GBA, GON4L, HCN3, KIAA0907, KRTCAP2, LENEP, MAPBPIP, MSTO1, MTX1, MUC1, PBXIP1, PKLR, PMVK, PYGO2, RAG1AP1, RIT1, RUSC1, RXFP4, SCAMP3, SHC1, SSR2, SYT11, THBS3, TRIM46, UBQLN4, YY1AP1, ZBTB7B	(males)
chr1	155268130	155268131	rs180921974	Rask-Andersen M	2019-01-21	Genome-wide association study of body fat distribution identifies adiposity loci and sex-specific genetic effects.	Body fat distribution (leg fat ratio)	55,006 British ancestry males, 61,132 British ancestry females	112,425 British ancestry males, 133,936 British ancestry females	1q22	ADAM15, ARHGEF2, ASH1L, C1orf2, C1orf104, CKS1B, CLK2, DAP3, DCST1, DCST2, DPM3, EFNA1, EFNA3, EFNA4, FDPS, FLAD1, GBA, GON4L, HCN3, KIAA0907, KRTCAP2, LENEP, MAPBPIP, MSTO1, MTX1, MUC1, PBXIP1, PKLR, PMVK, PYGO2, RAG1AP1, RIT1, RUSC1, RXFP4, SCAMP3, SHC1, SSR2, SYT11, THBS3, TRIM46, UBQLN4, YY1AP1, ZBTB7B	(females)
chr1	155268130	155268131	rs180921974	Rask-Andersen M	2019-01-21	Genome-wide association study of body fat distribution identifies adiposity loci and sex-specific genetic effects.	Body fat distribution (leg fat ratio)	55,006 British ancestry males, 61,132 British ancestry females	112,425 British ancestry males, 133,936 British ancestry females	1q22	ADAM15, ARHGEF2, ASH1L, C1orf2, C1orf104, CKS1B, CLK2, DAP3, DCST1, DCST2, DPM3, EFNA1, EFNA3, EFNA4, FDPS, FLAD1, GBA, GON4L, HCN3, KIAA0907, KRTCAP2, LENEP, MAPBPIP, MSTO1, MTX1, MUC1, PBXIP1, PKLR, PMVK, PYGO2, RAG1AP1, RIT1, RUSC1, RXFP4, SCAMP3, SHC1, SSR2, SYT11, THBS3, TRIM46, UBQLN4, YY1AP1, ZBTB7B	(males)
chr1	155268130	155268131	rs180921974	Rask-Andersen M	2019-01-21	Genome-wide association study of body fat distribution identifies adiposity loci and sex-specific genetic effects.	Body fat distribution (leg fat ratio)	55,006 British ancestry males, 61,132 British ancestry females	112,425 British ancestry males, 133,936 British ancestry females	1q22	ADAM15, ARHGEF2, ASH1L, C1orf2, C1orf104, CKS1B, CLK2, DAP3, DCST1, DCST2, DPM3, EFNA1, EFNA3, EFNA4, FDPS, FLAD1, GBA, GON4L, HCN3, KIAA0907, KRTCAP2, LENEP, MAPBPIP, MSTO1, MTX1, MUC1, PBXIP1, PKLR, PMVK, PYGO2, RAG1AP1, RIT1, RUSC1, RXFP4, SCAMP3, SHC1, SSR2, SYT11, THBS3, TRIM46, UBQLN4, YY1AP1, ZBTB7B
chr1	155269775	155269776	rs3020781	Vujkovic M	2020-06-15	Discovery of 318 new risk loci for type 2 diabetes and related vascular outcomes among 1.4 million participants in a multi-ancestry meta-analysis.	Type 2 diabetes	148,726 European ancestry cases, 965,732 European ancestry controls	NA	1q22	NR
chr1	155269775	155269776	rs3020781	Vujkovic M	2020-06-15	Discovery of 318 new risk loci for type 2 diabetes and related vascular outcomes among 1.4 million participants in a multi-ancestry meta-analysis.	Type 2 diabetes	148,726 European ancestry cases, 24,646 African American cases, 8,616 Hispanic cases, 46,511 Asian ancestry cases, 965,732 European ancestry controls, 31,446 African American controls, 11,829 Hispanic controls, 169,776 Asian ancestry controls	NA	1q22	NR
chr1	155271433	155271434	rs141119689	Astle WJ	2016-11-17	The Allelic Landscape of Human Blood Cell Trait Variation and Links to Common Complex Disease.	Reticulocyte fraction of red cells	170,690 European ancestry individuals	NA	1q22	PKLR
chr1	155271433	155271434	rs141119689	Astle WJ	2016-11-17	The Allelic Landscape of Human Blood Cell Trait Variation and Links to Common Complex Disease.	Reticulocyte count	170,641 European ancestry individuals	NA	1q22	PKLR
chr1	155271433	155271434	rs141119689	Astle WJ	2016-11-17	The Allelic Landscape of Human Blood Cell Trait Variation and Links to Common Complex Disease.	High light scatter reticulocyte percentage of red cells	170,763 European ancestry individuals	NA	1q22	PKLR
chr1	155271433	155271434	rs141119689	Astle WJ	2016-11-17	The Allelic Landscape of Human Blood Cell Trait Variation and Links to Common Complex Disease.	High light scatter reticulocyte count	170,761 European ancestry individuals	NA	1q22	PKLR
chr1	155272273	155272274	rs7524950	Michailidou K	2017-10-23	Association analysis identifies 65 new breast cancer risk loci.	Breast cancer	76,192 European ancestry cases, 63,082 European ancestry controls	46,785 European ancestry cases, 42,892 European ancestry controls, 14,068 East Asian ancestry cases, 13,104 East Asian ancestry controls	1q22	NR	(EA)
chr1	155284585	155284586	rs11264360	Manousaki D	2020-02-05	Genome-wide Association Study for Vitamin D Levels Reveals 69 Independent Loci.	Serum 25-Hydroxyvitamin D levels	443,734 European ancestry individuals	NA	1q22	NR
chr1	155289544	155289545	rs11264361	Revez JA	2020-04-02	Genome-wide association study identifies 143 loci associated with 25 hydroxyvitamin D concentration.	Serum 25-Hydroxyvitamin D levels	496,946 European ancestry individuals	NA	1q22
chr1	155303096	155303097	rs151026328	Zhu Z	2019-10-24	Shared Genetic and Experimental Links between Obesity-Related Traits and Asthma Subtypes in UK Biobank.	Body mass index	457,822 European ancestry individuals	NA	1q22	NR
chr1	155303106	155303107	rs140959946	Zhu Z	2019-10-24	Shared Genetic and Experimental Links between Obesity-Related Traits and Asthma Subtypes in UK Biobank.	Waist-to-hip ratio adjusted for BMI	457,690 European ancestry individuals	NA	1q22	NR
chr1	155388850	155388851	rs12734374	Rongve A	2019-05-07	GBA and APOE ?4 associate with sporadic dementia with Lewy bodies in European genome wide association study.	Dementia with Lewy bodies	720 European ancestry cases, 6,490 European ancestry controls	108 European ancestry cases, 75,545 European ancestry controls	1q22	ASH1L, GBA
chr1	155388850	155388851	rs12734374	Kichaev G	2018-12-27	Leveraging Polygenic Functional Enrichment to Improve GWAS Power.	Red blood cell count	approximately 445,000 European ancestry individuals	NA	1q22
chr1	155389687	155389688	rs10908465	Revez JA	2020-04-02	Genome-wide association study identifies 143 loci associated with 25 hydroxyvitamin D concentration.	Serum 25-Hydroxyvitamin D levels	417,580 European ancestry individuals	NA	1q22
chr1	155399291	155399292	rs7514174	Lee JJ	2018-07-23	Gene discovery and polygenic prediction from a genome-wide association study of educational attainment in 1.1 million individuals.	Self-reported math ability	564,698 European ancestry individuals	NA	1q22	Intergenic
chr1	155416327	155416328	rs10796944	Michailidou K	2017-10-23	Association analysis identifies 65 new breast cancer risk loci.	Breast cancer	76,192 European ancestry cases, 63,082 European ancestry controls	46,785 European ancestry cases, 42,892 European ancestry controls, 14,068 East Asian ancestry cases, 13,104 East Asian ancestry controls	1q22	NR	(EA)
chr1	155435095	155435096	rs553470220	Hernandez Cordero AI	2019-11-21	Genome-wide Associations Reveal Human-Mouse Genetic Convergence and Modifiers of Myogenesis, CPNE1 and STC2.	Appendicular lean mass	181,862 European ancestry elderly individuals	NA	1q22	NR
chr1	155448414	155448415	rs13373934	Sanders AE	2016-09-06	Chronic Periodontitis Genome-wide Association Study in the Hispanic Community Health Study / Study of Latinos.	Chronic periodontitis (mean interproximal clinical attachment level)	10,935 Hispanic individuals	4,402 European ancestry individuals, 908 African American individuals	1q22	ASH1L
chr1	155459154	155459155	rs61812092	Zhu Z	2019-10-24	Shared Genetic and Experimental Links between Obesity-Related Traits and Asthma Subtypes in UK Biobank.	Body mass index	457,822 European ancestry individuals	NA	1q22	NR
chr1	155484429	155484430	rs77350683	Vuckovic D	2020-09-01	The Polygenic and Monogenic Basis of Blood Traits and Diseases.	Reticulocyte fraction of red cells	408,112 British individuals	NA	1q22	ASH1L
chr1	155484429	155484430	rs77350683	Vuckovic D	2020-09-01	The Polygenic and Monogenic Basis of Blood Traits and Diseases.	Reticulocyte count	408,112 British individuals	NA	1q22	ASH1L
chr1	155484429	155484430	rs77350683	Vuckovic D	2020-09-01	The Polygenic and Monogenic Basis of Blood Traits and Diseases.	High light scatter reticulocyte percentage of red cells	408,112 British individuals	NA	1q22	ASH1L
chr1	155484429	155484430	rs77350683	Vuckovic D	2020-09-01	The Polygenic and Monogenic Basis of Blood Traits and Diseases.	High light scatter reticulocyte count	408,112 British individuals	NA	1q22	ASH1L
chr1	155485026	155485027	rs80142782	Wang Z	2015-12-23	Identification of new susceptibility loci for gastric non-cardia adenocarcinoma: pooled results from two Chinese genome-wide association studies.	Non-cardia gastric cancer	2,031 Han Chinese ancestry cases, 4,970 Han Chinese ancestry controls	3,564 Han Chinese ancestry cases, 4,637 Han Chinese ancestry controls	1q22	ASH1L
chr1	155538488	155538489	rs139932136	Hernandez Cordero AI	2019-11-21	Genome-wide Associations Reveal Human-Mouse Genetic Convergence and Modifiers of Myogenesis, CPNE1 and STC2.	Appendicular lean mass	181,862 European ancestry elderly individuals	NA	1q22	NR
chr1	155556970	155556971	rs12091730	Michailidou K	2017-10-23	Association analysis identifies 65 new breast cancer risk loci.	Breast cancer	76,192 European ancestry cases, 63,082 European ancestry controls	46,785 European ancestry cases, 42,892 European ancestry controls, 14,068 East Asian ancestry cases, 13,104 East Asian ancestry controls	1q22	NR	(EA)
chr1	155578041	155578042	rs35202981	Casanova F	2019-10-20	A genome-wide association study implicates multiple mechanisms influencing raised urinary albumin-creatinine ratio.	Urinary albumin-to-creatinine ratio	437,027 European ancestry individuals	60,130 individuals	1q22	MSTO1	(EA)
chr1	155584193	155584194	rs564968560	Olafsson S	2019-10-30	Common and rare sequence variants influencing tumor biomarkers in blood.	Serum cancer antigen 15.3 levels	7,107 Icelandic ancestry individuals	NA	1q22	MSTO1
# region=chr1:154675090-155675089												Header
chr1	154685540	154685541	rs16830122	Jun G	2015-03-17	A novel Alzheimer disease locus located near the gene encoding tau protein.	Alzheimer's disease in APOE e4- carriers	7,184 cases, 26,968 controls	718 European ancestry cases, 1,699 European ancestry controls	1q21.3	KCNN3
chr1	154714005	154714006	rs4999127	Nielsen JB	2018-07-30	Biobank-driven genomic discovery yields new insight into atrial fibrillation biology.	Atrial fibrillation	60,620 European ancestry cases, 970,216 European ancestry controls	NA	1q21.3	KCNN3
chr1	154714005	154714006	rs4999127	Roselli C	2018-06-11	Multi-ethnic genome-wide association study for atrial fibrillation.	Atrial fibrillation	55,114 European ancestry cases, 482,295 European ancestry controls, 8,180 Japanese ancestry cases, 28,612 Japanese ancestry controls, 1,307 African American ancestry cases, 7,660 African American ancestry controls, 845 Hispanic cases, 4,177 Hispanic controls	NA	1q21.3	KCNN3	(EA)
chr1	154742981	154742982	rs538633861	Tachmazidou I	2017-06-01	Whole-Genome Sequencing Coupled to Imputation Discovers Genetic Signals for Anthropometric Traits.	Height	1,249 whole genome sequenced European ancestry individuals, 3,541 whole genome sequenced individuals, 46,910 European ancestry individuals, 471 Carlantino (founder/genetic isolate) individuals, 1,197 Friuli Venezia Giulia (founder/genetic isolate) individuals, 1,043 Mylopotamos (founder/genetic isolate) individuals, 933 Pomak (founder/genetic isolate) individuals, 1,785 Val Borbera (founder/genet…	205,003 European ancestry individuals	1q21.3	KCNN3
chr1	154754193	154754194	rs6691316	Comuzzie AG	2012-12-04	Novel genetic loci identified for the pathophysiology of childhood obesity in the Hispanic population.	Obesity-related traits	815 Hispanic children from 263 families	NA	1q21.3	KCNN3	(ALT/AST)
chr1	154754193	154754194	rs6691316	Comuzzie AG	2012-12-04	Novel genetic loci identified for the pathophysiology of childhood obesity in the Hispanic population.	Obesity-related traits	815 Hispanic children from 263 families	NA	1q21.3	KCNN3	(AST/ALT)
chr1	154775243	154775244	rs61811867	Pollack S	2018-11-28	Multiethnic Genome-wide Association Study of Diabetic Retinopathy using Liability Threshold Modeling of Duration of Diabetes and Glycemic Control.	Proliferative diabetic retinopathy (vs no DR)	398 European ancestry cases, 1,970 European ancestry controls, 1,097 African American cases, 941 African American controls	1,354 East Asian ancestry cases, 1130 East Asian ancestry controls, 801 European ancestry cases, 2,880 European ancestry controls, 232 Hispanic cases, 1,048 Hispanic controls	1q21.3	NR	(AA)
chr1	154792268	154792269	rs2798603	Kichaev G	2018-12-27	Leveraging Polygenic Functional Enrichment to Improve GWAS Power.	Waist-hip ratio	approximately 458,000 European ancestry individuals	NA	1q21.3
chr1	154793762	154793763	rs951240	Zhu Z	2019-10-24	Shared Genetic and Experimental Links between Obesity-Related Traits and Asthma Subtypes in UK Biobank.	Waist-to-hip ratio adjusted for BMI	457,690 European ancestry individuals	NA	1q21.3	NR
chr1	154812399	154812400	rs34292822	Roselli C	2018-06-11	Multi-ethnic genome-wide association study for atrial fibrillation.	Atrial fibrillation	55,114 European ancestry cases, 482,295 European ancestry controls, 8,180 Japanese ancestry cases, 28,612 Japanese ancestry controls, 1,307 African American ancestry cases, 7,660 African American ancestry controls, 845 Hispanic cases, 4,177 Hispanic controls	NA	1q21.3	KCNN3	(EA)
chr1	154813618	154813619	rs6426985	Warrington NM	2019-05-01	Maternal and fetal genetic effects on birth weight and their relevance to cardio-metabolic risk factors.	Offspring birth weight	210,267 European ancestry individuals, 19,802 individuals	NR	1q21.3	DCST2, KCNN3
chr1	154813618	154813619	rs6426985	Warrington NM	2019-05-01	Maternal and fetal genetic effects on birth weight and their relevance to cardio-metabolic risk factors.	Birth weight	298,142 European ancestry individuals, 6,635 African American individuals, 1,449 Filipino individuals, 420 Turkish individuals, 365 Moroccan individuals, 395 Surinamese individuals, 1,052 Afro-Caribbean individuals, 612 Hispanic individuals, 1,180 Thai individuals, 840 Chinese ancestry individuals, 10,133 individuals	NR	1q21.3	DCST2, KCNN3
chr1	154814267	154814268	rs6666258	Ellinor PT	2012-04-29	Meta-analysis identifies six new susceptibility loci for atrial fibrillation.	Atrial fibrillation	6,707 European ancestry cases, 52,426 European ancestry controls	5,381 European ancestry casses, 10,030 European ancestry controls	1q21.3	KCNN3, PMVK
chr1	154814352	154814353	rs13376333	Ellinor PT	2010-02-21	Common variants in KCNN3 are associated with lone atrial fibrillation.	Atrial fibrillation	1,335 European ancestry cases, 12,844 European ancestry controls	1,164 European ancestry cases, 3,607 European ancestry controls	1q21.3	KCNN3
chr1	154818402	154818403	rs36004974	Christophersen IE	2017-04-17	Large-scale analyses of common and rare variants identify 12 new loci associated with atrial fibrillation.	Prevalent atrial fibrillation	8,656 European ancestry cases, 102,776 European ancestry controls.		1q21.3	KCNN3
chr1	154827090	154827091	rs146787591	Tachmazidou I	2017-06-01	Whole-Genome Sequencing Coupled to Imputation Discovers Genetic Signals for Anthropometric Traits.	Waist circumference adjusted for body mass index	1,247 whole genome sequenced European ancestry individuals, 3,050 whole genome sequenced individuals, 41,027 European ancestry individuals, 397 Carlantino (founder/genetic isolate) individuals, 790 Friuli Venezia Giulia (founder/genetic isolate) individuals, 1,005 Mylopotamos (founder/genetic isolate) individuals, 875 Pomak (founder/genetic isolate) individuals, 1,754 Val Borbera (founder/genetic…	206,723 European ancestry individuals	1q21.3	KCNN3
chr1	154831142	154831143	rs34245846	Nielsen JB	2018-01-04	Genome-wide Study of Atrial Fibrillation Identifies Seven Risk Loci and Highlights Biological Pathways and Regulatory Elements Involved in Cardiac Development.	Atrial fibrillation	6,337 European ancestry cases, 61,607 European ancestry controls	30,679 European ancestry cases, 278,895 European ancestry controls	1q21.3	KCNN3
chr1	154834182	154834183	rs1218582	Schumacher FR	2018-06-11	Association analyses of more than 140,000 men identify 63 new prostate cancer susceptibility loci.	Prostate cancer	79,148 European ancestry cases, 61,106 European ancestry controls	NA	1q21.3	NR
chr1	154834182	154834183	rs1218582	Eeles RA	2013-04-01	Identification of 23 new prostate cancer susceptibility loci using the iCOGS custom genotyping array.	Prostate cancer	11,085 European ancestry cases, 11,463 European ancestry controls	19,662 European ancestry cases, 19,715 European ancestry controls	1q21.3	ADAM15, ADAR, CKS1B, DCST1, DCST2, EFNA3, EFNA4, LOC10050, FLAD1, KCNN3, LENEP, LOC100505666, MIR4258, PBXIP1, DPM3, PYGO2, EFNA1, SHC1, SLC50A1, ZBTB7B, PMVK
chr1	154848580	154848581	rs72702209	Hernandez Cordero AI	2019-11-21	Genome-wide Associations Reveal Human-Mouse Genetic Convergence and Modifiers of Myogenesis, CPNE1 and STC2.	Appendicular lean mass	181,862 European ancestry elderly individuals	NA	1q21.3	NR
chr1	154849770	154849771	rs12069356	Goes FS	2015-07-21	Genome-wide association study of schizophrenia in Ashkenazi Jews.	Schizophrenia	592 Ashkenazi Jewish ancestry cases, 505 Ashkenazi Jewish ancestry controls, 36,989 cases, 113,075 controls	NA	1q21.3	NR
chr1	154853976	154853977	rs7517628	Kichaev G	2018-12-27	Leveraging Polygenic Functional Enrichment to Improve GWAS Power.	Lung function (FEV1/FVC)	approximately 370,000 European ancestry individuals	NA	1q21.3
chr1	154855054	154855055	rs1630500	Vacic V	2014-05-19	Genome-wide mapping of IBD segments in an Ashkenazi PD cohort identifies associated haplotypes.	Parkinson's disease	1,130 Ashkenazi Jewish cases, 2,611 Ashkenazi Jewish controls	306 Ashkenazi Jewish cases, 2,583 Ashkenazi Jewish controls	1q21.3	GBA
chr1	154856890	154856891	rs77243303	Han X	2020-01-03	Using Mendelian randomization to evaluate the causal relationship between serum C-reactive protein levels and age-related macular degeneration.	C-reactive protein levels	418,642 British ancestry individuals	NA	1q21.3	NR
chr1	154862951	154862952	rs11264280	Nielsen JB	2018-07-30	Biobank-driven genomic discovery yields new insight into atrial fibrillation biology.	Atrial fibrillation	60,620 European ancestry cases, 970,216 European ancestry controls	NA	1q21.3	KCNN3
chr1	154862951	154862952	rs11264280	Roselli C	2018-06-11	Multi-ethnic genome-wide association study for atrial fibrillation.	Atrial fibrillation	55,114 European ancestry cases, 482,295 European ancestry controls, 8,180 Japanese ancestry cases, 28,612 Japanese ancestry controls, 1,307 African American ancestry cases, 7,660 African American ancestry controls, 845 Hispanic cases, 4,177 Hispanic controls	NA	1q21.3	KCNN3, PMVK	(EA)
chr1	154862951	154862952	rs11264280	Roselli C	2018-06-11	Multi-ethnic genome-wide association study for atrial fibrillation.	Atrial fibrillation	55,114 European ancestry cases, 482,295 European ancestry controls, 8,180 Japanese ancestry cases, 28,612 Japanese ancestry controls, 1,307 African American ancestry cases, 7,660 African American ancestry controls, 845 Hispanic cases, 4,177 Hispanic controls	NA	1q21.3	KCNN3, PMVK
chr1	154862951	154862952	rs11264280	Christophersen IE	2017-04-17	Large-scale analyses of common and rare variants identify 12 new loci associated with atrial fibrillation.	Incident atrial fibrillation	7,323 European ancestry cases, 102,776 European ancestry controls.		1q21.3	KCNN3
chr1	154862951	154862952	rs11264280	Christophersen IE	2017-04-17	Large-scale analyses of common and rare variants identify 12 new loci associated with atrial fibrillation.	Atrial fibrillation	15,979 European ancestry cases, 102,776 European ancestry controls.	NA	1q21.3	KCNN3
chr1	154862951	154862952	rs11264280	Christophersen IE	2017-04-17	Large-scale analyses of common and rare variants identify 12 new loci associated with atrial fibrillation.	Atrial fibrillation	15,979 European ancestry cases, 102,776 European ancestry controls, 641 African American cases, 5,234 African American controls, 837 Japanese ancestry cases, 3,293 Japanese controls, 277 Hispanic cases, 3,081 Hispanic controls,197 Brazilian ancestry cases, 758 Brazilian ancestry controls.	3,666 cases, 139,852 controls	1q21.3	KCNN3
chr1	154866092	154866093	rs4845399	Stahl EA	2019-05-01	Genome-wide association study identifies 30 loci associated with bipolar disorder.	Bipolar disorder	20,352 European ancestry cases, 31,358 European ancestry controls	9,412 European ancestry cases, 137,760 European ancestry controls	1q21.3	KCNN3, PMVK, PBXIP1, PYGO2, SHC1, CKS1B, MIR4258, FLAD1, LENEP, ZBTB7B, DCST2, DCST1, LOC100505666, ADAM15
chr1	154898184	154898185	rs114138760	Nalls MA	2019-12-01	Identification of novel risk loci, causal insights, and heritable risk for Parkinson's disease: a meta-analysis of genome-wide association studies.	Parkinson's disease or first degree relation to individual with Parkinson's disease	15,056 European ancestry cases, 18,618 European ancestry proxy cases, 449,056 European ancestry controls	22,632 European ancestry cases, 968,735 European ancestry controls	1q21.3	PMVK
chr1	154910929	154910930	rs58629129	Rashkin SR	2020-09-04	Pan-cancer study detects genetic risk variants and shared genetic basis in two large cohorts.	Prostate cancer	10,792 European ancestry cases, 410,350 European ancestry controls	NA	1q21.3
chr1	154918351	154918352	rs41264253	Zhu Z	2019-10-24	Shared Genetic and Experimental Links between Obesity-Related Traits and Asthma Subtypes in UK Biobank.	Waist-to-hip ratio adjusted for BMI	457,690 European ancestry individuals	NA	1q21.3	NR
chr1	154922598	154922599	rs147350405	Kichaev G	2018-12-27	Leveraging Polygenic Functional Enrichment to Improve GWAS Power.	Red blood cell count	approximately 445,000 European ancestry individuals	NA	1q21.3
chr1	154934962	154934963	rs3766920	Yang SK	2016-08-25	Identification of Loci at 1q21 and 16q23 That Affect Susceptibility to Inflammatory Bowel Disease in Koreans.	Inflammatory bowel disease	1,505 Korean ancestry cases, 4,041 Korean ancestry controls	1,989 Korean ancestry cases, 3,491 Korean ancestry controls	1q21.3	PMVK, PBXIP1, PYGO2, SHC1
chr1	154938661	154938662	rs8191979	Oskarsson GR	2020-04-23	Predicted loss and gain of function mutations in ACO1 are associated with erythropoiesis.	Hemoglobin levels	684,122 European ancestry individuals	NA	1q21.3	SHC1
chr1	154941262	154941263	rs8191981	Chen MH	2020-09-01	Trans-ethnic and Ancestry-Specific Blood-Cell Genetics in 746,667 Individuals from 5 Global Populations.	Eosinophil counts	86,890 East Asian ancestry individuals	NA	1q21.3	NR
chr1	154941262	154941263	rs8191981	Kanai M	2018-02-05	Genetic analysis of quantitative traits in the Japanese population links cell types to complex human diseases.	Eosinophil counts	62,076 Japanese ancestry individuals	NA	1q21.3	SHC1
chr1	154968259	154968260	rs7525164	Vuckovic D	2020-09-01	The Polygenic and Monogenic Basis of Blood Traits and Diseases.	Red blood cell count	408,112 British individuals	NA	1q21.3	FLAD1, LENEP
chr1	154976517	154976518	rs113405739	Vuckovic D	2020-09-01	The Polygenic and Monogenic Basis of Blood Traits and Diseases.	Hemoglobin	408,112 British individuals	NA	1q21.3	ZBTB7B
chr1	154976517	154976518	rs113405739	Vuckovic D	2020-09-01	The Polygenic and Monogenic Basis of Blood Traits and Diseases.	Hematocrit	408,112 British individuals	NA	1q21.3	ZBTB7B
chr1	154977928	154977929	rs4845402	Hysi PG	2020-03-30	Meta-analysis of 542,934 subjects of European ancestry identifies new genes and mechanisms predisposing to refractive error and myopia.	Refractive error	542,934 European ancestry individuals	NA	1q21.3	FLAD1, ZBTB7B, EFNA3, EFNA1, SLC50A1, KRTCAP2
chr1	154980340	154980341	rs12142017	Zhu Z	2019-10-24	Shared Genetic and Experimental Links between Obesity-Related Traits and Asthma Subtypes in UK Biobank.	Waist-to-hip ratio adjusted for BMI	457,690 European ancestry individuals	NA	1q21.3	NR
chr1	154980350	154980351	rs56103503	Conti DV	2021-01-04	Trans-ancestry genome-wide association meta-analysis of prostate cancer identifies new susceptibility loci and informs genetic risk prediction.	Prostate cancer	85,554 European ancestry cases, 10,368 African ancestry cases, 8,611 East Asian ancestry cases, 2,714 Hispanic cases, 91,972 European ancestry controls, 10,986 African ancestry controls, 18,809 East Asian ancestry controls, 5,239 Hispanic controls	NA	1q21.3	NR
chr1	154984362	154984363	rs1870940	Verweij N	2020-09-02	The Genetic Makeup of the Electrocardiogram.	Electrocardiogram morphology (amplitude at temporal datapoints)	63,706 European and unknown ancestry individuals	NA	1q21.3	ZBTB7B, DCST2	(92 ms)
chr1	154984362	154984363	rs1870940	Verweij N	2020-09-02	The Genetic Makeup of the Electrocardiogram.	Electrocardiogram morphology (amplitude at temporal datapoints)	63,706 European and unknown ancestry individuals	NA	1q21.3	ZBTB7B, DCST2	(94 ms)
chr1	154984362	154984363	rs1870940	Verweij N	2020-09-02	The Genetic Makeup of the Electrocardiogram.	Electrocardiogram morphology (amplitude at temporal datapoints)	63,706 European and unknown ancestry individuals	NA	1q21.3	ZBTB7B, DCST2	(96 ms)
chr1	154984362	154984363	rs1870940	Verweij N	2020-09-02	The Genetic Makeup of the Electrocardiogram.	Electrocardiogram morphology (amplitude at temporal datapoints)	63,706 European and unknown ancestry individuals	NA	1q21.3	ZBTB7B, DCST2	(108 ms)
chr1	154984362	154984363	rs1870940	Verweij N	2020-09-02	The Genetic Makeup of the Electrocardiogram.	Electrocardiogram morphology (amplitude at temporal datapoints)	63,706 European and unknown ancestry individuals	NA	1q21.3	ZBTB7B, DCST2	(106 ms)
chr1	154984362	154984363	rs1870940	Rashkin SR	2020-09-04	Pan-cancer study detects genetic risk variants and shared genetic basis in two large cohorts.	Cancer (pleiotropy)(bidirectional)	64,962 European ancestry cases, 410,350 European ancestry controls	NA	1q21.3
chr1	154984362	154984363	rs1870940	Ruth KS	2020-02-10	Using human genetics to understand the disease impacts of testosterone in men and women.	Total testosterone levels	425,097 European ancestry individuals	NA	1q21.3	NR
chr1	154984362	154984363	rs1870940	Ruth KS	2020-02-10	Using human genetics to understand the disease impacts of testosterone in men and women.	Total testosterone levels	230,454 European ancestry women	NA	1q21.3	NR
chr1	154984362	154984363	rs1870940	Liyanage UE	2019-06-07	Combined analysis of keratinocyte cancers identifies novel genome-wide loci.	Keratinocyte cancer (MTAG)	at least 18,538 European ancestry cases, at least 340,302 European ancestry controls	NA	1q21.3	ZBTB7B
chr1	154984362	154984363	rs1870940	Liyanage UE	2019-06-07	Combined analysis of keratinocyte cancers identifies novel genome-wide loci.	Basal cell carcinoma	31,787 European ancestry cases, 619,351 European ancestry controls	NA	1q21.3	ZBTB7B
chr1	154984362	154984363	rs1870940	Kichaev G	2018-12-27	Leveraging Polygenic Functional Enrichment to Improve GWAS Power.	Eczema	approximately 459,000 European ancestry individuals	NA	1q21.3
chr1	154986090	154986091	rs3753639	Richardson TG	2020-05-06	Use of genetic variation to separate the effects of early and later life adiposity on disease risk: mendelian randomisation study.	Adult body size	453,169 European ancestry individuals		1q21.3	ZBTB7B
chr1	154986090	154986091	rs3753639	Zhu Z	2019-10-24	Shared Genetic and Experimental Links between Obesity-Related Traits and Asthma Subtypes in UK Biobank.	Body mass index	457,822 European ancestry individuals	NA	1q21.3	NR
chr1	154986090	154986091	rs3753639	Horikoshi M	2016-10-13	Genome-wide associations for birth weight and correlations with adult disease.	Birth weight	133,903 European ancestry individuals, 6,635 African American individuals, 420 Turkish ancestry individuals, 365 Moroccan ancestry individuals, 395 Surinamese ancestry individuals, 840 Chinese ancestry individuals.	9,799 European ancestry individuals, 1,449 Filipino ancestry individuals.	1q21.3	ZBTB7B
chr1	154987703	154987704	rs141845046	Justice AE	2019-02-18	Protein-coding variants implicate novel genes related to lipid homeostasis contributing to body-fat distribution.	Waist-to-hip ratio adjusted for BMI (additive genetic model)	up to 157,516 European ancestry women, up to 180,131 African American, South Asian, East Asian and Hispanic ancestry women	up to 62,368 European ancestry women	1q21.3	ZBTB7B
chr1	154987703	154987704	rs141845046	Justice AE	2019-02-18	Protein-coding variants implicate novel genes related to lipid homeostasis contributing to body-fat distribution.	Waist-to-hip ratio adjusted for BMI (additive genetic model)	up to 157,516 European ancestry women	up to 62,368 European ancestry women	1q21.3	ZBTB7B
chr1	154987703	154987704	rs141845046	Justice AE	2019-02-18	Protein-coding variants implicate novel genes related to lipid homeostasis contributing to body-fat distribution.	Waist-to-hip ratio adjusted for BMI (additive genetic model)	288,492 European ancestry individuals, up to 15,687 African American individuals, up to 29,315 South Asian ancestry individuals, up to 6,800 East Asian ancestry individuals, up to 4,075 Hispanic ancestry individuals	132,177 European ancestry individuals	1q21.3	ZBTB7B
chr1	154987703	154987704	rs141845046	Justice AE	2019-02-18	Protein-coding variants implicate novel genes related to lipid homeostasis contributing to body-fat distribution.	Waist-to-hip ratio adjusted for BMI (additive genetic model)	288,492 European ancestry individuals	132,177 European ancestry individuals	1q21.3	ZBTB7B
chr1	154987703	154987704	rs141845046	Turcot V	2017-12-22	Protein-altering variants associated with body mass index implicate pathways that control energy intake and expenditure in obesity.	Body mass index	up to 449,889 European ancestry individuals, up to 29,398 South Asian ancestry individuals, up to 27,610 African American individuals, up to 8,839 East Asian individuals, up to 10,772 Hispanic ancestry individuals	up to 196,766 European ancestry individuals	1q21.3	ZBTB7B
chr1	154988532	154988533	rs77548871	Pei YF	2020-10-23	The genetic architecture of appendicular lean mass characterized by association analysis in the UK Biobank study.	Appendicular lean mass	450,243 European ancestry individuals	NA	1q21.3	NR
chr1	154988532	154988533	rs77548871	Hernandez Cordero AI	2019-11-21	Genome-wide Associations Reveal Human-Mouse Genetic Convergence and Modifiers of Myogenesis, CPNE1 and STC2.	Appendicular lean mass	85,750 European ancestry middle-aged adult individuals	NA	1q21.3	NR
chr1	154988532	154988533	rs77548871	Kar SP	2016-07-17	Genome-Wide Meta-Analyses of Breast, Ovarian, and Prostate Cancer Association Studies Identify Multiple New Susceptibility Loci Shared by at Least Two Cancer Types.	Breast cancer, ovarian cancer or prostate cancer (pleiotropy)	62,533 European ancestry breast cancer female cases, 60,976 European ancestry controls, 15,437 European ancestry invasive epithelial ovarian cancer female cases, 30,845 European ancestry controls, 34,379 European ancestry prostate cancer male cases, 33,164 European ancestry controls	NA	1q21.3	ZBTB7B
chr1	154988956	154988957	rs2242195	Kichaev G	2018-12-27	Leveraging Polygenic Functional Enrichment to Improve GWAS Power.	Body mass index	approximately 458,000 European ancestry individuals	NA	1q21.3
chr1	154990296	154990297	rs2242194	Goes FS	2015-07-21	Genome-wide association study of schizophrenia in Ashkenazi Jews.	Schizophrenia	592 Ashkenazi Jewish ancestry cases, 505 Ashkenazi Jewish ancestry controls, 36,989 cases, 113,075 controls	NA	1q21.3	NR
chr1	154991388	154991389	rs905938	Yang XL	2019-10-11	Three Novel Loci for Infant Head Circumference Identified by a Joint Association Analysis.	Birth weight (MTAG)	up to 182,902 European ancestry individuals	NA	1q21.3	NR
chr1	154991388	154991389	rs905938	Yang XL	2019-10-11	Three Novel Loci for Infant Head Circumference Identified by a Joint Association Analysis.	Birth length (MTAG)	up to 182,902 European ancestry individuals	NA	1q21.3	NR
chr1	154991388	154991389	rs905938	Zhu Z	2019-10-24	Shared Genetic and Experimental Links between Obesity-Related Traits and Asthma Subtypes in UK Biobank.	Waist-to-hip ratio adjusted for BMI	457,690 European ancestry individuals	NA	1q21.3	NR
chr1	154991388	154991389	rs905938	Plotnikov D	2019-05-16	Association between birth weight and refractive error in adulthood: a Mendelian randomisation study.	Birth weight	188,039 European ancestry individuals	NA	1q21.3	NR
chr1	154991388	154991389	rs905938	Warrington NM	2019-05-01	Maternal and fetal genetic effects on birth weight and their relevance to cardio-metabolic risk factors.	Offspring birth weight	210,267 European ancestry individuals, 19,802 individuals	NR	1q21.3	DCST2, KCNN3
chr1	154991388	154991389	rs905938	Warrington NM	2019-05-01	Maternal and fetal genetic effects on birth weight and their relevance to cardio-metabolic risk factors.	Birth weight	298,142 European ancestry individuals, 6,635 African American individuals, 1,449 Filipino individuals, 420 Turkish individuals, 365 Moroccan individuals, 395 Surinamese individuals, 1,052 Afro-Caribbean individuals, 612 Hispanic individuals, 1,180 Thai individuals, 840 Chinese ancestry individuals, 10,133 individuals	NR	1q21.3	DCST2, KCNN3
chr1	154991388	154991389	rs905938	Kichaev G	2018-12-27	Leveraging Polygenic Functional Enrichment to Improve GWAS Power.	Waist-hip ratio	approximately 458,000 European ancestry individuals	NA	1q21.3
chr1	154991388	154991389	rs905938	Lotta LA	2018-12-01	Association of Genetic Variants Related to Gluteofemoral vs Abdominal Fat Distribution With Type 2 Diabetes, Coronary Disease, and Cardiovascular Risk Factors.	Waist-to-hip ratio adjusted for BMI	660,648 European ancestry individuals	NA	1q21.3	NR
chr1	154991388	154991389	rs905938	Lotta LA	2018-12-01	Association of Genetic Variants Related to Gluteofemoral vs Abdominal Fat Distribution With Type 2 Diabetes, Coronary Disease, and Cardiovascular Risk Factors.	Waist-hip ratio	663,598 European ancestry individuals	NA	1q21.3	NR
chr1	154991388	154991389	rs905938	Pulit SL	2018-09-14	Meta-analysis of genome-wide association studies for body fat distribution in 694,649 individuals of European ancestry.	Waist-to-hip ratio adjusted for BMI	379,501 European ancestry female individuals	NA	1q21.3	NR
chr1	154991388	154991389	rs905938	Pulit SL	2018-09-14	Meta-analysis of genome-wide association studies for body fat distribution in 694,649 individuals of European ancestry.	Waist-hip ratio	697,734 European ancestry individuals	NA	1q21.3	NA
chr1	154991388	154991389	rs905938	Pulit SL	2018-09-14	Meta-analysis of genome-wide association studies for body fat distribution in 694,649 individuals of European ancestry.	Waist-hip ratio	381,152 European female individuals	NA	1q21.3	NR
chr1	154991388	154991389	rs905938	Justice AE	2017-04-26	Genome-wide meta-analysis of 241,258 adults accounting for smoking behaviour identifies novel loci for obesity traits.	Waist-to-hip ratio adjusted for BMI (adjusted for smoking behaviour)	95,362 European ancestry women, 62,085 European ancestry men, 5,829 European ancestry individuals, 10,500 African American/Afro-Caribbean ancestry women, 2,706 African American/Afro-Caribbean ancestry men, 1,030 Indian Asian ancestry women, 7,648 Indian Asian ancestry men, 1,793 Filipino ancestry women, 2,944 Hispanic/Latino ancestry women, 1,764 Hispanic/Latino ancestry men	21,496 European ancestry women, 24,385 European ancestry men, 118,364 European ancestry individuals, 2,326 African American/Afro-Caribbean ancestry women, 855 African American/Afro-Caribbean ancestry men	1q21.3	DCST2
chr1	154991388	154991389	rs905938	Justice AE	2017-04-26	Genome-wide meta-analysis of 241,258 adults accounting for smoking behaviour identifies novel loci for obesity traits.	Waist-to-hip ratio adjusted for BMI (adjusted for smoking behaviour)	95,362 European ancestry women, 62,085 European ancestry men, 5,829 European ancestry individuals, 10,500 African American/Afro-Caribbean ancestry women, 2,706 African American/Afro-Caribbean ancestry men, 1,030 Indian Asian ancestry women, 7,648 Indian Asian ancestry men, 1,793 Filipino ancestry women, 2,944 Hispanic/Latino ancestry women, 1,764 Hispanic/Latino ancestry men	21,496 European ancestry women, 24,385 European ancestry men, 118,364 European ancestry individuals, 2,326 African American/Afro-Caribbean ancestry women, 855 African American/Afro-Caribbean ancestry men	1q21.3	DCST2	(women)
chr1	154991388	154991389	rs905938	Winkler TW	2015-10-01	The Influence of Age and Sex on Genetic Associations with Adult Body Size and Shape: A Large-Scale Genome-Wide Interaction Study.	Waist-to-hip ratio adjusted for BMI x sex x age interaction (4df test)	up to 43,776 European ancestry men aged <50, up to 50,526 European ancestry women aged <50, up to 69,944 European ancestry men aged >50, up to 88,129 European ancestry women aged >50	NA	1q21.3	NR
chr1	154991388	154991389	rs905938	Winkler TW	2015-10-01	The Influence of Age and Sex on Genetic Associations with Adult Body Size and Shape: A Large-Scale Genome-Wide Interaction Study.	Waist-to-hip ratio adjusted for BMI	up to 113,720 European ancestry men, up to 138,655 European ancestry women	NA	1q21.3	NR
chr1	154991388	154991389	rs905938	Shungin D	2015-02-12	New genetic loci link adipose and insulin biology to body fat distribution.	Waist-to-hip ratio adjusted for body mass index	up to 56,910 European ancestry men, up to 86,570 European ancestry women	up to 36,570 European ancestry men, 30,172 European ancestry women, 915 Filipino ancestry men, 735 Filipino ancestry women, 2,351 African American/Afro-Caribbean ancestry men, 6,258 African American/Afro-Caribbean ancestry women, 2,285 South Asian ancestry men, 506 South Asian ancestry women, 195 Seychellois ancestry men, 266 Seychellois ancestry women	1q21.3	DCST2
chr1	154991388	154991389	rs905938	Shungin D	2015-02-12	New genetic loci link adipose and insulin biology to body fat distribution.	Waist-to-hip ratio adjusted for body mass index	up to 56,910 European ancestry men, up to 86,570 European ancestry women	up to 36,570 European ancestry men, 30,172 European ancestry women, 915 Filipino ancestry men, 735 Filipino ancestry women, 2,351 African American/Afro-Caribbean ancestry men, 6,258 African American/Afro-Caribbean ancestry women, 2,285 South Asian ancestry men, 506 South Asian ancestry women, 195 Seychellois ancestry men, 266 Seychellois ancestry women	1q21.3	DCST2	(EA)
chr1	154991388	154991389	rs905938	Shungin D	2015-02-12	New genetic loci link adipose and insulin biology to body fat distribution.	Waist-to-hip ratio adjusted for body mass index	up to 56,910 European ancestry men, up to 86,570 European ancestry women	up to 36,570 European ancestry men, 30,172 European ancestry women, 915 Filipino ancestry men, 735 Filipino ancestry women, 2,351 African American/Afro-Caribbean ancestry men, 6,258 African American/Afro-Caribbean ancestry women, 2,285 South Asian ancestry men, 506 South Asian ancestry women, 195 Seychellois ancestry men, 266 Seychellois ancestry women	1q21.3	DCST2	(EA, women)
chr1	154991388	154991389	rs905938	Shungin D	2015-02-12	New genetic loci link adipose and insulin biology to body fat distribution.	Waist-to-hip ratio adjusted for body mass index	up to 56,910 European ancestry men, up to 86,570 European ancestry women	up to 36,570 European ancestry men, 30,172 European ancestry women, 915 Filipino ancestry men, 735 Filipino ancestry women, 2,351 African American/Afro-Caribbean ancestry men, 6,258 African American/Afro-Caribbean ancestry women, 2,285 South Asian ancestry men, 506 South Asian ancestry women, 195 Seychellois ancestry men, 266 Seychellois ancestry women	1q21.3	DCST2	(women)
chr1	154991388	154991389	rs905938	van der Valk RJ	2014-10-03	A novel common variant in DCST2 is associated with length in early life and height in adulthood.	Birth length	28,459 European ancestry individuals	16,145 European ancestry individuals, 280 Moroccan ancestry individuals, 284 Surinamese ancestry individuals, 319 Turkish ancestry individuals, 651 Chinese ancestry individuals	1q21.3	DCST2
chr1	154993374	154993375	rs4845703	Zhu Z	2019-10-24	Shared Genetic and Experimental Links between Obesity-Related Traits and Asthma Subtypes in UK Biobank.	Waist-to-hip ratio adjusted for BMI	457,690 European ancestry individuals	NA	1q21.3	NR
chr1	154994749	154994750	rs11264296	Vuckovic D	2020-09-01	The Polygenic and Monogenic Basis of Blood Traits and Diseases.	Eosinophil counts	408,112 British individuals	NA	1q21.3	DCST2
chr1	154994749	154994750	rs11264296	Kichaev G	2018-12-27	Leveraging Polygenic Functional Enrichment to Improve GWAS Power.	Eosinophil counts	approximately 440,000 European ancestry individuals	NA	1q21.3
chr1	154994977	154994978	rs76798800	Pei YF	2020-10-23	The genetic architecture of appendicular lean mass characterized by association analysis in the UK Biobank study.	Appendicular lean mass	450,243 European ancestry individuals	NA	1q21.3	NR
chr1	154994977	154994978	rs76798800	Landi MT	2020-04-27	Genome-wide association meta-analyses combining multiple risk phenotypes provide insights into the genetic architecture of cutaneous melanoma susceptibility.	Nevus count or cutaneous melanoma	36,760 European ancestry cutaneous melanoma cases, 375,188 European ancestry controls, 12,930 European ancestry individuals, 52,847 individuals	NA	1q21.3	DCST2
chr1	154994977	154994978	rs76798800	Landi MT	2020-04-27	Genome-wide association meta-analyses combining multiple risk phenotypes provide insights into the genetic architecture of cutaneous melanoma susceptibility.	Cutaneous malignant melanoma	36,760 European ancestry cases, 375,188 European ancestry controls	NA	1q21.3	DCST2
chr1	154994977	154994978	rs76798800	Revez JA	2020-04-02	Genome-wide association study identifies 143 loci associated with 25 hydroxyvitamin D concentration.	Serum 25-Hydroxyvitamin D levels	496,946 European ancestry individuals	NA	1q21.3
chr1	154994977	154994978	rs76798800	Revez JA	2020-04-02	Genome-wide association study identifies 143 loci associated with 25 hydroxyvitamin D concentration.	Serum 25-Hydroxyvitamin D levels	417,580 European ancestry individuals	NA	1q21.3
chr1	154994977	154994978	rs76798800	Hernandez Cordero AI	2019-11-21	Genome-wide Associations Reveal Human-Mouse Genetic Convergence and Modifiers of Myogenesis, CPNE1 and STC2.	Appendicular lean mass	85,750 European ancestry middle-aged adult individuals	NA	1q21.3	NR
chr1	154994977	154994978	rs76798800	Hernandez Cordero AI	2019-11-21	Genome-wide Associations Reveal Human-Mouse Genetic Convergence and Modifiers of Myogenesis, CPNE1 and STC2.	Appendicular lean mass	181,862 European ancestry elderly individuals	NA	1q21.3	NR
chr1	154994977	154994978	rs76798800	Hubel C	2018-12-28	Genomics of body fat percentage may contribute to sex bias in anorexia nervosa.	Fat-free mass	70,700 European ancestry female individuals, 85,261 European ancestry male individuals	NA	1q21.3	NR
chr1	154994977	154994978	rs76798800	Hubel C	2018-12-28	Genomics of body fat percentage may contribute to sex bias in anorexia nervosa.	Fat-free mass	70,700 European ancestry female individuals, 85,261 European ancestry male individuals	NA	1q21.3	NR	(male)
chr1	154994977	154994978	rs76798800	Hubel C	2018-12-28	Genomics of body fat percentage may contribute to sex bias in anorexia nervosa.	Fat-free mass	70,700 European ancestry female individuals, 85,261 European ancestry male individuals	NA	1q21.3	NR	(female)
chr1	154997571	154997572	rs113261881	Richardson TG	2020-03-23	Evaluating the relationship between circulating lipoprotein lipids and apolipoproteins with risk of coronary heart disease: A multivariable Mendelian randomisation analysis.	HDL cholesterol levels	403,943 European ancestry individuals	NA	1q21.3	DCST2
chr1	155001280	155001281	rs150138294	Zhu Z	2019-10-24	Shared Genetic and Experimental Links between Obesity-Related Traits and Asthma Subtypes in UK Biobank.	Waist-to-hip ratio adjusted for BMI	457,690 European ancestry individuals	NA	1q21.3	NR
chr1	155006449	155006450	rs74520550	Kichaev G	2018-12-27	Leveraging Polygenic Functional Enrichment to Improve GWAS Power.	Height	approximately 458,000 European ancestry individuals	NA	1q21.3
chr1	155006450	155006451	rs76306191	Rueger S	2018-05-21	Evaluation and application of summary statistic imputation to discover new height-associated loci.	Height	253,288 European ancestry individuals	336,474 European ancestry individuals	1q21.3	DCST1
chr1	155016126	155016127	rs76735429	Zhang Q	2018-10-22	Genotype effects contribute to variation in longitudinal methylome patterns in older people.	DNA methylation variation (age effect)	Up to 954 individuals	NA	1q21.3	NR
chr1	155027218	155027219	rs569036944	Chai JF	2020-09-16	Genome-wide association for HbA1c in Malay identified deletion on SLC4A1 that influences HbA1c independent of glycemia.	Glycated hemoglobin levels	2,704 Malay ancestry individuals	NA	1q21.3
chr1	155028521	155028522	rs11264302	Timmins IR	2020-10-30	Genome-wide association study of self-reported walking pace suggests beneficial effects of brisk walking on health and survival.	Walking pace	450,967 European ancestry individuals	NA	1q21.3	ADAM15
chr1	155030556	155030557	rs11264303	Vuckovic D	2020-09-01	The Polygenic and Monogenic Basis of Blood Traits and Diseases.	Eosinophil percentage of white cells	408,112 British individuals	NA	1q21.3	ADAM15
chr1	155033307	155033308	rs11589479	Karlsson Linner R	2019-01-14	Genome-wide association analyses of risk tolerance and risky behaviors in over 1 million individuals identify hundreds of loci and shared genetic influences.	Adventurousness	557,923 European ancestry individuals	NA	1q21.3	EFNA4
chr1	155033307	155033308	rs11589479	Jones AV	2017-04-01	GWAS of self-reported mosquito bite size, itch intensity and attractiveness to mosquitoes implicates immune-related predisposition loci.	Mosquito bite size	84,724 European ancestry individuals	NA	1q21.3	ADAM15
chr1	155033307	155033308	rs11589479	Pickrell JK	2016-05-16	Detection and interpretation of shared genetic influences on 42 human traits.	Chin dimples	58,032 European ancestry cases, 13,457 European ancestry controls	NA	1q21.3	ADAM15
chr1	155033917	155033918	rs41264285	Karlsson Linner R	2019-01-14	Genome-wide association analyses of risk tolerance and risky behaviors in over 1 million individuals identify hundreds of loci and shared genetic influences.	General risk tolerance (MTAG)	975,353 European ancestry individuals	NA	1q21.3	ADAM15
chr1	155033917	155033918	rs41264285	Liu M	2019-01-14	Association studies of up to 1.2 million individuals yield new insights into the genetic etiology of tobacco and alcohol use.	Smoking initiation (ever regular vs never regular) (MTAG)	up to 1,359,002 European ancestry individuals	NA	1q21.3	NR
chr1	155033917	155033918	rs41264285	Langefeld CD	2017-07-17	Transancestral mapping and genetic load in systemic lupus erythematosus.	Systemic lupus erythematosus	6,748 European ancestry cases, 11,516 European ancestry controls	NA	1q21.3	ADAM15, EFNA1
chr1	155034631	155034632	rs45444697	Liu M	2019-01-14	Association studies of up to 1.2 million individuals yield new insights into the genetic etiology of tobacco and alcohol use.	Smoking initiation (ever regular vs never regular)	up to 1,232,091 European ancestry individuals	NA	1q21.3	NR	(Conditioned on chr1:154206358)
chr1	155034631	155034632	rs45444697	Sun BB	2018-06-06	Genomic atlas of the human plasma proteome.	Blood protein levels	3,301 European ancestry individuals	NA	1q21.3	NR	(Sushi, von Willebrand factor type A, EGF and pentraxin domain-containing protein 1, SVEP1.11178.21.3)
chr1	155046401	155046402	rs72702268	Pei YF	2020-10-23	The genetic architecture of appendicular lean mass characterized by association analysis in the UK Biobank study.	Appendicular lean mass	450,243 European ancestry individuals	NA	1q21.3	NR
chr1	155046401	155046402	rs72702268	Hernandez Cordero AI	2019-11-21	Genome-wide Associations Reveal Human-Mouse Genetic Convergence and Modifiers of Myogenesis, CPNE1 and STC2.	Appendicular lean mass	85,750 European ancestry middle-aged adult individuals	NA	1q21.3	NR
chr1	155066415	155066416	rs10908454	Revez JA	2020-04-02	Genome-wide association study identifies 143 loci associated with 25 hydroxyvitamin D concentration.	Serum 25-Hydroxyvitamin D levels	496,946 European ancestry individuals	NA	1q21.3
chr1	155071587	155071588	rs57742792	Han X	2019-09-06	Genome-wide association analysis of 95 549 individuals identifies novel loci and genes influencing optic disc morphology.	Optic disc size	67,040 British ancestry individuals	28,509 European ancestry individuals	1q21.3	EFNA3
chr1	155076733	155076734	rs7366355	Boutin TS	2019-12-09	Insights into the genetic basis of retinal detachment.	Cataracts (operation)	21,679 British ancestry cases, 387,283 British ancestry controls	NA	1q22	EFNA3
chr1	155082157	155082158	rs11581730	Warrington NM	2018-04-12	Genome-wide association study identifies nine novel loci for 2D:4D finger ratio, a putative retrospective biomarker of testosterone exposure in utero.	Digit length ratio (right hand)	12,636 European ancestry individuals	NA	1q22	EFNA1
chr1	155082157	155082158	rs11581730	Warrington NM	2018-04-12	Genome-wide association study identifies nine novel loci for 2D:4D finger ratio, a putative retrospective biomarker of testosterone exposure in utero.	Digit length ratio (left hand)	14,382 European ancestry individuals, 1,279 non-European ancestry individuals	NA	1q22	EFNA1	(EA)
chr1	155082157	155082158	rs11581730	Warrington NM	2018-04-12	Genome-wide association study identifies nine novel loci for 2D:4D finger ratio, a putative retrospective biomarker of testosterone exposure in utero.	Digit length ratio (left hand)	14,382 European ancestry individuals, 1,279 non-European ancestry individuals	NA	1q22	EFNA1
chr1	155082157	155082158	rs11581730	Warrington NM	2018-04-12	Genome-wide association study identifies nine novel loci for 2D:4D finger ratio, a putative retrospective biomarker of testosterone exposure in utero.	Digit length ratio	12,586 European ancestry individuals	NA	1q22	EFNA1
chr1	155087410	155087411	rs34455078	Greenwood TA	2019-10-09	Genome-wide Association of Endophenotypes for Schizophrenia From the Consortium on the Genetics of Schizophrenia (COGS) Study.	Emotional recognition	523 European ancestry schizophrenia cases, 100 Latino schizophrenia cases, 827 European ancestry controls, 83 Latino controls	NA	1q22	EFNA1
chr1	155087932	155087933	rs11264322	Revez JA	2020-04-02	Genome-wide association study identifies 143 loci associated with 25 hydroxyvitamin D concentration.	Serum 25-Hydroxyvitamin D levels	417,580 European ancestry individuals	NA	1q22
chr1	155089010	155089011	rs76268375	Zhu Z	2019-10-24	Shared Genetic and Experimental Links between Obesity-Related Traits and Asthma Subtypes in UK Biobank.	Waist-to-hip ratio adjusted for BMI	457,690 European ancestry individuals	NA	1q22	NR
chr1	155090104	155090105	rs11264323	Vuckovic D	2020-09-01	The Polygenic and Monogenic Basis of Blood Traits and Diseases.	Plateletcrit	408,112 British individuals	NA	1q22	Y_RNA
chr1	155091175	155091176	rs61811931	Skuladottir AT	2021-02-18	A meta-analysis uncovers the first sequence variant conferring risk of Bell's palsy.	Bell's palsy	4,714 European ancestry cases, 1,011,520 European ancestry controls	NA	1q22	intergenic
chr1	155094604	155094605	rs11807418	Ripatti P	2020-03-10	Polygenic Hyperlipidemias and Coronary Artery Disease Risk.	Low density lipoprotein cholesterol levels	324,708 British ancestry individuals	NA	1q22	MTX1
chr1	155095106	155095107	rs11264327	Haas ME	2018-09-06	Genetic Association of Albuminuria with Cardiometabolic Disease and Blood Pressure.	Urinary albumin excretion	382,500 European ancestry individuals	NA	1q22	EFNA3, EFNA1
chr1	155095749	155095750	rs9330264	Li M	2017-06-06	Genome-wide association study of 1,5-anhydroglucitol identifies novel genetic loci linked to glucose metabolism.	1,5-anhydroglucitol levels	7,550 European ancestry individuals	8,790 European ancestry individuals, 2,030 African American individuals	1q22	EFNA1/SLC50A1	(EA)
chr1	155098904	155098905	rs11264330	Comuzzie AG	2012-12-04	Novel genetic loci identified for the pathophysiology of childhood obesity in the Hispanic population.	Obesity-related traits	815 Hispanic children from 263 families	NA	1q22	EFNA1	(MCP1 )
chr1	155106053	155106054	rs4390169	Kichaev G	2018-12-27	Leveraging Polygenic Functional Enrichment to Improve GWAS Power.	Hair color	approximately 452,000 European ancestry individuals	NA	1q22
chr1	155106226	155106227	rs4745	Verweij N	2020-09-02	The Genetic Makeup of the Electrocardiogram.	Electrocardiogram morphology (amplitude at temporal datapoints)	63,706 European and unknown ancestry individuals	NA	1q22	EFNA1, SLC50A1, DPM3	(32 ms)
chr1	155106226	155106227	rs4745	Verweij N	2020-09-02	The Genetic Makeup of the Electrocardiogram.	Electrocardiogram morphology (amplitude at temporal datapoints)	63,706 European and unknown ancestry individuals	NA	1q22	EFNA1, SLC50A1, DPM3	(34 ms)
chr1	155106226	155106227	rs4745	Verweij N	2020-09-02	The Genetic Makeup of the Electrocardiogram.	Electrocardiogram morphology (amplitude at temporal datapoints)	63,706 European and unknown ancestry individuals	NA	1q22	EFNA1, SLC50A1, DPM3	(26 ms)
chr1	155106226	155106227	rs4745	Verweij N	2020-09-02	The Genetic Makeup of the Electrocardiogram.	Electrocardiogram morphology (amplitude at temporal datapoints)	63,706 European and unknown ancestry individuals	NA	1q22	EFNA1, SLC50A1, DPM3	(22 ms)
chr1	155106226	155106227	rs4745	Verweij N	2020-09-02	The Genetic Makeup of the Electrocardiogram.	Electrocardiogram morphology (amplitude at temporal datapoints)	63,706 European and unknown ancestry individuals	NA	1q22	EFNA1, SLC50A1, DPM3	(20 ms)
chr1	155106226	155106227	rs4745	Verweij N	2020-09-02	The Genetic Makeup of the Electrocardiogram.	Electrocardiogram morphology (amplitude at temporal datapoints)	63,706 European and unknown ancestry individuals	NA	1q22	EFNA1, SLC50A1, DPM3	(28 ms)
chr1	155106226	155106227	rs4745	Verweij N	2020-09-02	The Genetic Makeup of the Electrocardiogram.	Electrocardiogram morphology (amplitude at temporal datapoints)	63,706 European and unknown ancestry individuals	NA	1q22	EFNA1, SLC50A1, DPM3	(30 ms)
chr1	155106226	155106227	rs4745	Verweij N	2020-09-02	The Genetic Makeup of the Electrocardiogram.	Electrocardiogram morphology (amplitude at temporal datapoints)	63,706 European and unknown ancestry individuals	NA	1q22	EFNA1, SLC50A1, DPM3	(24 ms)
chr1	155106226	155106227	rs4745	Liu DJ	2017-10-30	Exome-wide association study of plasma lipids in >300,000 individuals.	Low density lipoprotein cholesterol levels	up to 237,050 European ancestry individuals, up to 16,935 African ancestry individuals, up to 30,468 South Asian ancestry individuals, up to 8,287 East Asian ancestry individuals, 5,084 Hispanic individuals	up to 286,268 European and unknown ancestry individuals	1q22	NR
chr1	155106226	155106227	rs4745	Liu DJ	2017-10-30	Exome-wide association study of plasma lipids in >300,000 individuals.	Low density lipoprotein cholesterol levels	up to 237,050 European ancestry individuals	NA	1q22	NR
chr1	155106696	155106697	rs12904	Chen VL	2021-02-05	Genome-wide association study of serum liver enzymes implicates diverse metabolic and liver pathology.	Aspartate aminotransferase levels	389,565 European ancestry individuals	134,182 East Asian ancestry individuals	1q22	EFNA1
chr1	155106696	155106697	rs12904	Chen VL	2021-02-05	Genome-wide association study of serum liver enzymes implicates diverse metabolic and liver pathology.	Alanine aminotransferase levels	390,812 European ancestry individuals	134,154 East Asian ancestry individuals	1q22	EFNA1
chr1	155106696	155106697	rs12904	Nielsen JB	2020-12-18	Loss-of-function genomic variants highlight potential therapeutic targets for cardiovascular disease.	Gamma glutamyl transferase levels	76,081 European ancestry individuals, 127,395 Japanese ancestry individuals	NA	1q22	EFNA1
chr1	155108166	155108167	rs12726330	Pankratz N	2012-03-01	Meta-analysis of Parkinson's disease: identification of a novel locus, RIT2.	Parkinson's disease	4,238 European ancestry cases, 4,239 European ancestry controls	3,738 European ancestry cases, 2,111 European ancestry controls	1q22	GBA
chr1	155111306	155111307	rs71628645	Kichaev G	2018-12-27	Leveraging Polygenic Functional Enrichment to Improve GWAS Power.	Red blood cell count	approximately 445,000 European ancestry individuals	NA	1q22
chr1	155115259	155115260	rs4246529	Tin A	2019-10-02	Target genes, variants, tissues and transcriptional pathways influencing human serum urate levels.	Urate levels	288,649 European ancestry individuals, 125,725 East Asian ancestry individuals, 33,671 African American individuals, 9,037 South Asian ancestry individuals, 608 Hispanic individuals	NA	1q22	DPM3	(AA)
chr1	155118587	155118588	rs147847496	Conti DV	2021-01-04	Trans-ancestry genome-wide association meta-analysis of prostate cancer identifies new susceptibility loci and informs genetic risk prediction.	Prostate cancer	85,554 European ancestry cases, 10,368 African ancestry cases, 8,611 East Asian ancestry cases, 2,714 Hispanic cases, 91,972 European ancestry controls, 10,986 African ancestry controls, 18,809 East Asian ancestry controls, 5,239 Hispanic controls	NA	1q22	NR
chr1	155123836	155123837	rs6676150	Hellwege JN	2019-08-26	Mapping eGFR loci to the renal transcriptome and phenome in the VA Million Veteran Program.	Estimated glomerular filtration rate in non-diabetics	152,624 European ancestry individuals, 36,369 African American individuals	NA	1q22	DPM3
chr1	155126902	155126903	rs140676308	Hernandez Cordero AI	2019-11-21	Genome-wide Associations Reveal Human-Mouse Genetic Convergence and Modifiers of Myogenesis, CPNE1 and STC2.	Appendicular lean mass	181,862 European ancestry elderly individuals	NA	1q22	NR
chr1	155126947	155126948	rs10908458	Chambers JC	2011-10-16	Genome-wide association study identifies loci influencing concentrations of liver enzymes in plasma.	Liver enzyme levels (gamma-glutamyl transferase)	Up to 52,350 European ancestry individuals, up to 8,739 Indian Asian ancestry individuals	NA	1q22	DPM3, EFNA1, PKLR
chr1	155129561	155129562	rs12129003	Chen MH	2020-09-01	Trans-ethnic and Ancestry-Specific Blood-Cell Genetics in 746,667 Individuals from 5 Global Populations.	Platelet count	721,201 African American or Afro-Caribbean, African ancestry, European ancestry, East Asian ancestry, Hispanic or Latin American and South Asian ancestry individuals	NA	1q22	NR
chr1	155130390	155130391	rs4971079	Ellinghaus D	2016-03-14	Analysis of five chronic inflammatory diseases identifies 27 new associations and highlights disease-specific patterns at shared loci.	Chronic inflammatory diseases (ankylosing spondylitis, Crohn's disease, psoriasis, primary sclerosing cholangitis, ulcerative colitis) (pleiotropy)	8,726 European ancestry ankylosing spondylitis cases, 19,085 European ancestry Crohn's disease cases, 6,530 European ancestry psoriasis cases, 3,408 European ancestry primary sclerosing cholangitis cases, 14,513 European ancestry ulcerative colitis cases, 34,213 European ancestry controls	NA	1q22	HMGN2P18	(subset analysis)
chr1	155130797	155130798	rs4440846	Hwang LD	2019-04-21	New insight into human sweet taste: a genome-wide association study of the perception and intake of sweet substances.	Perceived intensity of sucrose	686 European ancestry twins	NA	1q22	KRTCAP2
chr1	155131393	155131394	rs34257409	Casanova F	2019-10-20	A genome-wide association study implicates multiple mechanisms influencing raised urinary albumin-creatinine ratio.	Urinary albumin-to-creatinine ratio	437,027 European ancestry individuals	60,130 individuals	1q22	DPM3, KRTCAP2	(EA)
chr1	155131393	155131394	rs34257409	Teumer A	2019-09-11	Genome-wide association meta-analyses and fine-mapping elucidate pathways influencing albuminuria.	Urinary albumin-to-creatinine ratio	547,361 European ancestry individuals	NA	1q22	KRTCAP2
chr1	155135035	155135036	rs35749011	Nalls MA	2019-12-01	Identification of novel risk loci, causal insights, and heritable risk for Parkinson's disease: a meta-analysis of genome-wide association studies.	Parkinson's disease or first degree relation to individual with Parkinson's disease	15,056 European ancestry cases, 18,618 European ancestry proxy cases, 449,056 European ancestry controls	22,632 European ancestry cases, 968,735 European ancestry controls	1q22	KRTCAP2
chr1	155135035	155135036	rs35749011	Guerreiro R	2018-01-01	Investigating the genetic architecture of dementia with Lewy bodies: a two-stage genome-wide association study.	Dementia with Lewy bodies	1,216 European ancestry cases, 3,791 European ancestry controls	527 European ancestry cases, 663 European ancestry controls	1q22	GBA
chr1	155135035	155135036	rs35749011	Chang D	2017-09-11	A meta-analysis of genome-wide association studies identifies 17 new Parkinson's disease risk loci.	Parkinson's disease	20,184 European ancestry cases, 397,324 European ancestry controls	5,851 European ancestry cases, 5,866 European ancestry controls	1q22	GBA
chr1	155135035	155135036	rs35749011	Nalls MA	2014-07-27	Large-scale meta-analysis of genome-wide association data identifies six new risk loci for Parkinson's disease.	Parkinson's disease	13,708 European ancestry cases, 95,282 European ancestry controls	5,353 European ancestry cases, 5,551 European ancestry controls	1q22	GBA, SYT11
chr1	155135334	155135335	rs4460629	Pirastu N	2021-04-22	Genetic analyses identify widespread sex-differential participation bias.	Biological sex	1,301,549 European ancestry cases, 1,160,583 European ancestry controls	NA	1q22	NA
chr1	155135334	155135335	rs4460629	Corre T	2017-11-01	Genome-Wide Meta-Analysis Unravels Interactions between Magnesium Homeostasis and Metabolic Phenotypes.	Serum magnesium levels	5,265 European ancestry individuals, 1,541 Val Borbera (founder/genetic isolate) individuals, 281 Carlantino (founder/genetic isolate) individuals, 889 Korcula (founder/genetic isolate) individuals	NA	1q22	MUC1
chr1	155137394	155137395	rs141942982	Shrine N	2019-02-25	New genetic signals for lung function highlight pathways and chronic obstructive pulmonary disease associations across multiple ancestries.	Peak expiratory flow	321,047 European ancestry individuals	24,218 European ancestry individuals	1q22	KRTCAP2
chr1	155137394	155137395	rs141942982	Shrine N	2019-02-25	New genetic signals for lung function highlight pathways and chronic obstructive pulmonary disease associations across multiple ancestries.	Lung function (FEV1/FVC)	321,047 European ancestry individuals	79,005 European ancestry individuals	1q22	KRTCAP2
chr1	155137394	155137395	rs141942982	Kichaev G	2018-12-27	Leveraging Polygenic Functional Enrichment to Improve GWAS Power.	Height	approximately 458,000 European ancestry individuals	NA	1q22
chr1	155138841	155138842	rs75925257	van der Meer D	2020-07-14	Understanding the genetic determinants of the brain with MOSTest.	Subcortical volume (min-P)	26,502 European ancestry individuals	NA	1q22	LACTBL1, C1orf234, KDM1A, LUZP1, HTR1D
chr1	155138841	155138842	rs75925257	van der Meer D	2020-07-14	Understanding the genetic determinants of the brain with MOSTest.	Subcortical volume (MOSTest)	26,502 European ancestry individuals	NA	1q22	MACF1, KIAA0754, BMP8A, PABPC4
chr1	155138841	155138842	rs75925257	van der Meer D	2020-07-14	Understanding the genetic determinants of the brain with MOSTest.	Brain morphology (min-P)	26,502 European ancestry individuals	NA	1q22	C1orf210, TIE1, MPL, CDC20, ELOVL1, MED8, SZT2, HYI
chr1	155138841	155138842	rs75925257	van der Meer D	2020-07-14	Understanding the genetic determinants of the brain with MOSTest.	Brain morphology (MOSTest)	26,502 European ancestry individuals	NA	1q22	KCNN3, DCST2, DCST1, ADAM15, EFNA4, EFNA3, EFNA1, SLC50A1, DPM3, KRTCAP2, RP11-201K10.3, TRIM46, MUC1, THBS3, MTX1, GBA, FAM189B, SCAMP3, CLK2, HCN3, PKLR, FDPS, RUSC1, ASH1L, MSTO1, YY1AP1, DAP3, GON4L, SYT11, RIT1, KIAA0907, RXFP4, ARHGEF2, LMNA
chr1	155140647	155140648	rs11264339	van Setten J	2018-07-25	PR interval genome-wide association meta-analysis identifies 50 loci associated with atrial and atrioventricular electrical activity.	PR interval	92,340 European ancestry individuals	NA	1q22	KRTCAP2
chr1	155142882	155142883	rs4971088	Zhao B	2019-11-01	Genome-wide association analysis of 19,629 individuals identifies variants influencing regional brain volumes and refines their genetic co-architecture with cognitive and mental health traits.	Brain region volumes	19,629 British ancestry individuals	NA	1q22	NR	(white matter)
chr1	155142926	155142927	rs4971089	Ferreira MAR	2020-06-30	Age-of-onset information helps identify 76 genetic variants associated with allergic disease.	Allergic disease (asthma, hay fever and/or eczema) (multivariate analysis)	477,968 European ancestry individuals	NA	1q22	KRTCAP2
chr1	155142926	155142927	rs4971089	Ferreira MAR	2020-06-30	Age-of-onset information helps identify 76 genetic variants associated with allergic disease.	Allergic disease (asthma, hay fever and/or eczema) (age of onset)	117,130 European ancestry individuals	NA	1q22	KRTCAP2
chr1	155142926	155142927	rs4971089	Ntalla I	2020-05-21	Multi-ancestry GWAS of the electrocardiographic PR interval identifies 202 loci underlying cardiac conduction.	PR interval	271,570 European ancestry individuals, 8,173 African American individuals, 12,823 Hispanic/Latino individuals	NA	1q22	KRTCAP2
chr1	155143767	155143768	rs4971091	Rask-Andersen M	2019-01-21	Genome-wide association study of body fat distribution identifies adiposity loci and sex-specific genetic effects.	Body fat distribution (arm fat ratio)	55,006 British ancestry males, 61,132 British ancestry females	112,425 British ancestry males, 133,936 British ancestry females	1q22	KRTCAP2	(females)
chr1	155143767	155143768	rs4971091	Rask-Andersen M	2019-01-21	Genome-wide association study of body fat distribution identifies adiposity loci and sex-specific genetic effects.	Body fat distribution (arm fat ratio)	55,006 British ancestry males, 61,132 British ancestry females	112,425 British ancestry males, 133,936 British ancestry females	1q22	KRTCAP2
chr1	155143945	155143946	rs4971092	Ishigaki K	2020-06-08	Large-scale genome-wide association study in a Japanese population identifies novel susceptibility loci across different diseases.	Gastric cancer	6,563 Japanese ancestry cases, 195,745 Japanese ancestry controls	NA	1q22
chr1	155148780	155148781	rs4971059	Michailidou K	2017-10-23	Association analysis identifies 65 new breast cancer risk loci.	Breast cancer	76,192 European ancestry cases, 63,082 European ancestry controls	46,785 European ancestry cases, 42,892 European ancestry controls, 14,068 East Asian ancestry cases, 13,104 East Asian ancestry controls	1q22	TRIM46	(EA)
chr1	155151492	155151493	rs11264341	Boocock J	2020-01-27	Genomic dissection of 43 serum urate-associated loci provides multiple insights into molecular mechanisms of urate control.	Urate levels	110,238 European ancestry individuals, 21,471 East Asian individuals	NA	1q22	TRIM46
chr1	155151492	155151493	rs11264341	Nakatochi M	2019-04-08	Genome-wide meta-analysis identifies multiple novel loci associated with serum uric acid levels in Japanese individuals.	Serum uric acid levels	121,745 Japanese ancestry individuals	at least 101,293 European ancestry individuals	1q22	TRIM46	(Japanese)
chr1	155151492	155151493	rs11264341	Kichaev G	2018-12-27	Leveraging Polygenic Functional Enrichment to Improve GWAS Power.	Lung function (FVC)	approximately 372,000 European ancestry individuals	NA	1q22
chr1	155151492	155151493	rs11264341	Kottgen A	2012-12-23	Genome-wide association analyses identify 18 new loci associated with serum urate concentrations.	Urate levels	49,825 European ancestry males, 60,522 European ancestry females	Up to 32,813 European ancestry individuals	1q22	TRIM46, PKLR
chr1	155153536	155153537	rs111508230	Pei YF	2020-10-23	The genetic architecture of appendicular lean mass characterized by association analysis in the UK Biobank study.	Appendicular lean mass	450,243 European ancestry individuals	NA	1q22	NR
chr1	155153536	155153537	rs111508230	Hernandez Cordero AI	2019-11-21	Genome-wide Associations Reveal Human-Mouse Genetic Convergence and Modifiers of Myogenesis, CPNE1 and STC2.	Appendicular lean mass	85,750 European ancestry middle-aged adult individuals	NA	1q22	NR
chr1	155155607	155155608	rs4971099	Shungin D	2019-06-24	Genome-wide analysis of dental caries and periodontitis combining clinical and self-reported data.	Number of decayed, missing and filled tooth surfaces or use of dentures	14,976 European ancestry individuals with decayed, missing or filled tooth surface measurement, 11,816 Hispanic/Latino individuals with decayed, missing or filled tooth surface measurement, 77,714 European ancestry dentures cases, 383,317 European ancestry controls	NA	1q22	KRTCAP2
chr1	155155607	155155608	rs4971099	Shungin D	2019-06-24	Genome-wide analysis of dental caries and periodontitis combining clinical and self-reported data.	Dentures	77,714 European ancestry cases, 383,317 European ancestry controls	NA	1q22	KRTCAP2
chr1	155155730	155155731	rs4971100	Gill D	2020-12-28	Urate, Blood Pressure, and Cardiovascular Disease: Evidence From Mendelian Randomization and Meta-Analysis of Clinical Trials.	Urate levels	454,183 European ancestry individuals	NA	1q22	NR
chr1	155155730	155155731	rs4971100	Milne S	2020-08-24	Protective effect of club cell secretory protein (CC-16) on COPD risk and progression: a Mendelian randomisation study.	Serum CC16 levels	5,552 individuals	NA	1q22	TRIM46
chr1	155155730	155155731	rs4971100	Wuttke M	2019-05-31	A catalog of genetic loci associated with kidney function from analyses of a million individuals.	Estimated glomerular filtration rate	567,460 European ancestry individuals, 165,726 East Asian ancestry individuals, 13,842 African American individuals, 13,359 South Asian ancestry individuals, 4,961 Hispanic individuals	216,518 European ancestry individuals, 64,204 non-Hispanic black individuals	1q22	TRIM46
chr1	155155730	155155731	rs4971100	Wuttke M	2019-05-31	A catalog of genetic loci associated with kidney function from analyses of a million individuals.	Estimated glomerular filtration rate	165,726 East Asian ancestry individuals	NA	1q22	TRIM46
chr1	155155730	155155731	rs4971100	Nakatochi M	2019-04-08	Genome-wide meta-analysis identifies multiple novel loci associated with serum uric acid levels in Japanese individuals.	Serum uric acid levels	121,745 Japanese ancestry individuals, at least 88,461 European ancestry individuals	NA	1q22	TRIM46	(Japanese)
chr1	155155730	155155731	rs4971100	Nakatochi M	2019-04-08	Genome-wide meta-analysis identifies multiple novel loci associated with serum uric acid levels in Japanese individuals.	Serum uric acid levels	121,745 Japanese ancestry individuals, at least 88,461 European ancestry individuals	NA	1q22	TRIM46	(EA)
chr1	155155730	155155731	rs4971100	Chang X	2015-04-17	Genome-wide association study of serum minerals levels in children of different ethnic background.	Magnesium levels	2,317 European ancestry children, 1,283 African American ancestry children	NA	1q22	MUC1	(EA)
chr1	155155730	155155731	rs4971100	Chang X	2015-04-17	Genome-wide association study of serum minerals levels in children of different ethnic background.	Magnesium levels	2,317 European ancestry children, 1,283 African American ancestry children	NA	1q22	MUC1
chr1	155157714	155157715	rs2070803	Tin A	2019-10-02	Target genes, variants, tissues and transcriptional pathways influencing human serum urate levels.	Urate levels	288,649 European ancestry individuals, 125,725 East Asian ancestry individuals, 33,671 African American individuals, 9,037 South Asian ancestry individuals, 608 Hispanic individuals	NA	1q22	TRIM46
chr1	155157714	155157715	rs2070803	Tin A	2019-10-02	Target genes, variants, tissues and transcriptional pathways influencing human serum urate levels.	Urate levels	288,649 European ancestry individuals	NA	1q22	TRIM46
chr1	155157714	155157715	rs2070803	Tin A	2019-10-02	Target genes, variants, tissues and transcriptional pathways influencing human serum urate levels.	Urate levels	174,111 European, East Asian, African American, South Asian and Hispanic ancestry men, 172,102 European, East Asian, African American, South Asian and Hispanic ancestry women	NA	1q22	NR	(men)
chr1	155157714	155157715	rs2070803	Tin A	2019-10-02	Target genes, variants, tissues and transcriptional pathways influencing human serum urate levels.	Urate levels	174,111 European, East Asian, African American, South Asian and Hispanic ancestry men, 172,102 European, East Asian, African American, South Asian and Hispanic ancestry women	NA	1q22	NR	(women)
chr1	155157714	155157715	rs2070803	Tin A	2019-10-02	Target genes, variants, tissues and transcriptional pathways influencing human serum urate levels.	Gout	13,179 European, African American and unknown ancestry cases, 750,634 European, African American and unknown ancestry controls	NA	1q22	MUC1	(EA)
chr1	155157714	155157715	rs2070803	Teumer A	2019-09-11	Genome-wide association meta-analyses and fine-mapping elucidate pathways influencing albuminuria.	Urinary albumin-to-creatinine ratio	547,361 European ancestry individuals, 6,795 African American individuals, 6,324 East Asian ancestry individuals, 2,335 South Asian ancestry individuals, 1,442 Hispanic individuals	NA	1q22	TRIM46
chr1	155157714	155157715	rs2070803	Teumer A	2019-09-11	Genome-wide association meta-analyses and fine-mapping elucidate pathways influencing albuminuria.	Microalbuminuria	51,861 European, African American, East Asian, South Asian or Hispanic ancestry cases, 297,093 European, African American, East Asian, South Asian or Hispanic ancestry controls	NA	1q22	TRIM46
chr1	155157714	155157715	rs2070803	Morris AP	2019-01-03	Trans-ethnic kidney function association study reveals putative causal genes and effects on kidney-specific disease aetiologies.	Estimated glomerular filtration rate	134,070 European ancestry individuals, 143,658 East Asian ancestry individuals, 26,344 Hispanic or Latino ancestry individuals, 8,224 African American individuals	NA	1q22	GBAP1
chr1	155161793	155161794	rs147048677	Wu Y	2021-02-19	GWAS of peptic ulcer disease implicates Helicobacter pylori infection, other gastrointestinal disorders and depression.	Peptic ulcer disease	16,666 European ancestry cases, 439,661 European ancestry controls	NA	1q22	NR
chr1	155162066	155162067	rs4072037	Nakatochi M	2019-04-08	Genome-wide meta-analysis identifies multiple novel loci associated with serum uric acid levels in Japanese individuals.	Serum uric acid levels	121,745 Japanese ancestry individuals	at least 101,293 European ancestry individuals	1q22	MUC1	(Japanese)
chr1	155162066	155162067	rs4072037	Takeuchi F	2018-11-28	Interethnic analyses of blood pressure loci in populations of East Asian and European descent.	Diastolic blood pressure	130,777 Japanese ancestry individuals	53,008 East Asian individuals, 105,253 European ancestry individuals	1q22	NR	(East Asian)
chr1	155162066	155162067	rs4072037	Kanai M	2018-02-05	Genetic analysis of quantitative traits in the Japanese population links cell types to complex human diseases.	Serum uric acid levels	109,029 Japanese ancestry individuals	NA	1q22	MUC1
chr1	155162066	155162067	rs4072037	Wang Z	2015-12-23	Identification of new susceptibility loci for gastric non-cardia adenocarcinoma: pooled results from two Chinese genome-wide association studies.	Non-cardia gastric cancer	2,031 Han Chinese ancestry cases, 4,970 Han Chinese ancestry controls	3,564 Han Chinese ancestry cases, 4,637 Han Chinese ancestry controls	1q22	MUC1
chr1	155162066	155162067	rs4072037	Teumer A	2015-12-02	Genome-wide Association Studies Identify Genetic Loci Associated With Albuminuria in Diabetes.	Urinary albumin-to-creatinine ratio in non-diabetics	up to 46,051 European ancestry individuals	NA	1q22	MUC1, MIR92B, THBS3, TRIM46, KRTC
chr1	155162066	155162067	rs4072037	Teumer A	2015-12-02	Genome-wide Association Studies Identify Genetic Loci Associated With Albuminuria in Diabetes.	Urinary albumin-to-creatinine ratio	up to 54,450 European ancestry individuals	NA	1q22	MUC1
chr1	155162066	155162067	rs4072037	Hu N	2015-06-30	Genome-wide association study of gastric adenocarcinoma in Asia: a comparison of associations between cardia and non-cardia tumours.	Gastric cancer	2,350 East Asian ancestry cases, 2,708 East Asian ancestry controls	7,408 East Asian ancestry cases, 7,548 East Asian ancestry controls	1q22	MUC1
chr1	155162066	155162067	rs4072037	Tin A	2015-05-29	Genetic loci for serum magnesium among African-Americans and gene-environment interaction at MUC1 and TRPM6 in European-Americans: the Atherosclerosis Risk in Communities (ARIC) study.	Magnesium levels	2,737 African American individuals	942 African American individuals	1q22	MUC1
chr1	155162066	155162067	rs4072037	Abnet CC	2010-08-22	A shared susceptibility locus in PLCE1 at 10q23 for gastric adenocarcinoma and esophageal squamous cell carcinoma.	Esophageal cancer and gastric cancer	1,625 Chinese ancestry gastric cancer cases, 1,898 Chinese ancestry ESCC cases, 2,100 Chinese ancestry controls	NA	1q22	NR	(Total gastric)
chr1	155162066	155162067	rs4072037	Meyer TE	2010-08-05	Genome-wide association studies of serum magnesium, potassium, and sodium concentrations identify six Loci influencing serum magnesium levels.	Magnesium levels	15,366 European ancestry individuals	8,463 European ancestry individuals	1q22	MUC1
chr1	155164479	155164480	rs12411216	van der Lee SJ	2019-08-02	A genome-wide association study identifies genetic loci associated with specific lobar brain volumes.	Occipital lobe volume	15,269 European ancestry individuals, 405 African American individuals, 211 Chinese ancestry individuals, 131 Malay ancestry individuals	NA	1q22	MIR92B, THBS3
chr1	155164479	155164480	rs12411216	Kim SK	2018-07-26	Identification of 613 new loci associated with heel bone mineral density and a polygenic risk score for bone mineral density, osteoporosis and fracture.	Heel bone mineral density	394,929 European ancestry individuals	NA	1q22
chr1	155167785	155167786	rs41264915	Olafsson S	2019-10-30	Common and rare sequence variants influencing tumor biomarkers in blood.	Serum cancer antigen 15.3 levels	7,107 Icelandic ancestry individuals	NA	1q22	THBS3
chr1	155167785	155167786	rs41264915	Kichaev G	2018-12-27	Leveraging Polygenic Functional Enrichment to Improve GWAS Power.	Lung function (FEV1/FVC)	approximately 370,000 European ancestry individuals	NA	1q22
chr1	155169200	155169201	rs11355526	Vuckovic D	2020-09-01	The Polygenic and Monogenic Basis of Blood Traits and Diseases.	Mean corpuscular hemoglobin concentration	408,112 British individuals	NA	1q22	THBS3, RP11-263K19.4
chr1	155175088	155175089	rs72704117	Zhu Z	2019-10-24	Shared Genetic and Experimental Links between Obesity-Related Traits and Asthma Subtypes in UK Biobank.	Waist circumference adjusted for body mass index	457,690 European ancestry individuals	NA	1q22	NR
chr1	155175088	155175089	rs72704117	Olafsson S	2019-10-30	Common and rare sequence variants influencing tumor biomarkers in blood.	Serum cancer antigen 15.3 levels	7,107 Icelandic ancestry individuals	NA	1q22	THBS3
chr1	155175389	155175390	rs370545	Chen MH	2020-09-01	Trans-ethnic and Ancestry-Specific Blood-Cell Genetics in 746,667 Individuals from 5 Global Populations.	Mean corpuscular hemoglobin concentration	642,173 African American or Afro-Caribbean, African ancestry, European ancestry, East Asian ancestry, Hispanic or Latin American and South Asian ancestry individuals	NA	1q22	NR
chr1	155175389	155175390	rs370545	Chen MH	2020-09-01	Trans-ethnic and Ancestry-Specific Blood-Cell Genetics in 746,667 Individuals from 5 Global Populations.	Mean corpuscular hemoglobin concentration	491,553 European ancestry individuals	NA	1q22	NR
chr1	155175891	155175892	rs914615	Thio CHL	2019-02-26	Genome-Wide Association Scan of Serum Urea in European Populations Identifies Two Novel Loci.	Serum urea levels	13,312 European ancestry individuals	7,379 European ancestry individuals	1q22	THBS3
chr1	155175891	155175892	rs914615	Morris JA	2018-12-31	An atlas of genetic influences on osteoporosis in humans and mice.	Heel bone mineral density	426,824 British ancestry individuals	NA	1q22	THBS3
chr1	155175891	155175892	rs914615	Kichaev G	2018-12-27	Leveraging Polygenic Functional Enrichment to Improve GWAS Power.	Heel bone mineral density	approximately 446,000 European ancestry individuals	NA	1q22
chr1	155175891	155175892	rs914615	Teumer A	2015-12-02	Genome-wide Association Studies Identify Genetic Loci Associated With Albuminuria in Diabetes.	Urinary albumin-to-creatinine ratio	up to 54,450 European ancestry individuals	NA	1q22	THBS3
chr1	155178781	155178782	rs760077	Folkersen L	2020-10-16	Genomic and drug target evaluation of 90 cardiovascular proteins in 30,931 individuals.	P-selectin glycoprotein ligand 1 levels	21,758 European ancestry individuals	9,173 individuals	1q22
chr1	155178781	155178782	rs760077	Vuckovic D	2020-09-01	The Polygenic and Monogenic Basis of Blood Traits and Diseases.	Red blood cell count	408,112 British individuals	NA	1q22	MTX1
chr1	155178781	155178782	rs760077	Vuckovic D	2020-09-01	The Polygenic and Monogenic Basis of Blood Traits and Diseases.	Hemoglobin	408,112 British individuals	NA	1q22	MTX1
chr1	155178781	155178782	rs760077	Vuckovic D	2020-09-01	The Polygenic and Monogenic Basis of Blood Traits and Diseases.	Hematocrit	408,112 British individuals	NA	1q22	MTX1
chr1	155178781	155178782	rs760077	Chen MH	2020-09-01	Trans-ethnic and Ancestry-Specific Blood-Cell Genetics in 746,667 Individuals from 5 Global Populations.	Red blood cell count	727,624 African American or Afro-Caribbean, African ancestry, European ancestry, East Asian ancestry, Hispanic or Latin American and South Asian ancestry individuals	NA	1q22	NR
chr1	155178781	155178782	rs760077	Chen MH	2020-09-01	Trans-ethnic and Ancestry-Specific Blood-Cell Genetics in 746,667 Individuals from 5 Global Populations.	Red blood cell count	545,203 European ancestry individuals	NA	1q22	NR
chr1	155178781	155178782	rs760077	Chen MH	2020-09-01	Trans-ethnic and Ancestry-Specific Blood-Cell Genetics in 746,667 Individuals from 5 Global Populations.	Hemoglobin concentration	746,431 African American or Afro-Caribbean, African ancestry, European ancestry, East Asian ancestry, Hispanic or Latin American and South Asian ancestry individuals	NA	1q22	NR
chr1	155178781	155178782	rs760077	Chen MH	2020-09-01	Trans-ethnic and Ancestry-Specific Blood-Cell Genetics in 746,667 Individuals from 5 Global Populations.	Hemoglobin concentration	563,946 European ancestry individuals	NA	1q22	NR
chr1	155178781	155178782	rs760077	Chen MH	2020-09-01	Trans-ethnic and Ancestry-Specific Blood-Cell Genetics in 746,667 Individuals from 5 Global Populations.	Hematocrit	737,823 African American or Afro-Caribbean, African ancestry, European ancestry, East Asian ancestry, Hispanic or Latin American and South Asian ancestry individuals	NA	1q22	NR
chr1	155178781	155178782	rs760077	Chen MH	2020-09-01	Trans-ethnic and Ancestry-Specific Blood-Cell Genetics in 746,667 Individuals from 5 Global Populations.	Hematocrit	562,259 European ancestry individuals	NA	1q22	NR
chr1	155178781	155178782	rs760077	Ishigaki K	2020-06-08	Large-scale genome-wide association study in a Japanese population identifies novel susceptibility loci across different diseases.	Gastric cancer	6,563 Japanese ancestry cases, 195,745 Japanese ancestry controls	NA	1q22
chr1	155178781	155178782	rs760077	Oskarsson GR	2020-04-23	Predicted loss and gain of function mutations in ACO1 are associated with erythropoiesis.	Hemoglobin levels	684,122 European ancestry individuals	NA	1q22	MTX1
chr1	155178781	155178782	rs760077	Olafsson S	2019-10-30	Common and rare sequence variants influencing tumor biomarkers in blood.	Serum cancer antigen 15.3 levels	7,107 Icelandic ancestry individuals	NA	1q22	MTX1
chr1	155178781	155178782	rs760077	Tin A	2019-10-02	Target genes, variants, tissues and transcriptional pathways influencing human serum urate levels.	Urate levels	288,649 European ancestry individuals, 125,725 East Asian ancestry individuals, 33,671 African American individuals, 9,037 South Asian ancestry individuals, 608 Hispanic individuals	NA	1q22	MTX1	(East Asian)
chr1	155178781	155178782	rs760077	Hellwege JN	2019-08-26	Mapping eGFR loci to the renal transcriptome and phenome in the VA Million Veteran Program.	Estimated glomerular filtration rate	70,762 European ancestry diabetic individuals, 152,624 European ancestry non-diabetic individuals, 20,967 African American diabetic individuals, 36,369 African American non-diabetic individuals	567,401 European ancestry individuals, 165,726 East Asian ancestry individuals, 13,359 South Asian ancestry individuals, 13,842 African American ancestry individuals, 4,961 Hispanic ancestry individuals	1q22	MTX1
chr1	155178781	155178782	rs760077	Yan C	2019-08-05	Meta-analysis of genome-wide association studies and functional assays decipher susceptibility genes for gastric cancer in Chinese populations.	Gastric cancer	3,771 Chinese ancestry cases, 5,426 Chinese ancestry controls	7,035 Chinese ancestry cases, 8,323 Chinese ancestry controls	1q22	MUC1
chr1	155178781	155178782	rs760077	Wuttke M	2019-05-31	A catalog of genetic loci associated with kidney function from analyses of a million individuals.	Blood urea nitrogen levels	416,178 European and unknown ancestry individuals	NA	1q22	MTX1
chr1	155178781	155178782	rs760077	Karlsson Linner R	2019-01-14	Genome-wide association analyses of risk tolerance and risky behaviors in over 1 million individuals identify hundreds of loci and shared genetic influences.	General risk tolerance (MTAG)	975,353 European ancestry individuals	NA	1q22	MTX1
chr1	155178781	155178782	rs760077	Kichaev G	2018-12-27	Leveraging Polygenic Functional Enrichment to Improve GWAS Power.	Red blood cell count	approximately 445,000 European ancestry individuals	NA	1q22
chr1	155178781	155178782	rs760077	Nagy R	2017-03-07	Exploration of haplotype research consortium imputation for genome-wide association studies in 20,032 Generation Scotland participants.	Urea levels	19,293 British ancestry individuals from 6863 families.	NA	1q22	MTX1
chr1	155178781	155178782	rs760077	Astle WJ	2016-11-17	The Allelic Landscape of Human Blood Cell Trait Variation and Links to Common Complex Disease.	Red blood cell count	172,952 European ancestry individuals	NA	1q22	MTX1
chr1	155178781	155178782	rs760077	Astle WJ	2016-11-17	The Allelic Landscape of Human Blood Cell Trait Variation and Links to Common Complex Disease.	Hemoglobin concentration	172,925 European ancestry individuals	NA	1q22	MTX1
chr1	155178781	155178782	rs760077	Astle WJ	2016-11-17	The Allelic Landscape of Human Blood Cell Trait Variation and Links to Common Complex Disease.	Hematocrit	173,039 European ancestry individuals	NA	1q22	MTX1
chr1	155181842	155181843	rs2974935	Fehringer G	2016-04-20	Cross-Cancer Genome-Wide Analysis of Lung, Ovary, Breast, Prostate, and Colorectal Cancer Reveals Novel Pleiotropic Associations.	Cancer	5,020 European ancestry lung cancer cases, 3,718 European ancestry lung adenocarcinoma cases, 3,422 European ancestry lung squamous cell carcinoma cases, 15,414 European ancestry colorectal cancer cases, 10,809 European ancestry breast cancer cases, 4,939 European ancestry estrogen receptor negative breast cancer cases, 1,098 European ancestry ovarian cancer cases, 2,556 European ancestry serous …	NA	1q22	MTX1
chr1	155182163	155182164	rs2075570	Fehringer G	2016-04-20	Cross-Cancer Genome-Wide Analysis of Lung, Ovary, Breast, Prostate, and Colorectal Cancer Reveals Novel Pleiotropic Associations.	Cancer (pleiotropy)	5,020 European ancestry lung cancer cases, 3,718 European ancestry lung adenocarcinoma cases, 3,422 European ancestry lung squamous cell carcinoma cases, 15,414 European ancestry colorectal cancer cases, 10,809 European ancestry breast cancer cases, 4,939 European ancestry estrogen receptor negative breast cancer cases, 1,098 European ancestry ovarian cancer cases, 2,556 European ancestry serous …	NA	1q22	MTX1	(subset analysis)
chr1	155184974	155184975	rs2990223	Chen MH	2020-09-01	Trans-ethnic and Ancestry-Specific Blood-Cell Genetics in 746,667 Individuals from 5 Global Populations.	Red cell distribution width	531,774 European ancestry individuals	NA	1q22	NR
chr1	155184974	155184975	rs2990223	Graham SE	2019-04-23	Sex-specific and pleiotropic effects underlying kidney function identified from GWAS meta-analysis.	Estimated glomerular filtration rate	206,856 European ancestry individuals, 143,658 East Asian ancestry individuals	NA	1q22	MTX1, MUC1
chr1	155186741	155186742	rs1057941	Tanikawa C	2018-10-03	A GWAS identifies gastric cancer susceptibility loci at 12q24.11-12 and 20q11.21.	Gastric cancer	6,171 Japanese ancestry cases, 27,178 Japanese ancestry controls	5,336 Japanese ancestry cases, 11,726 Japanese ancestry controls	1q22	NR
chr1	155186741	155186742	rs1057941	Fehringer G	2016-04-20	Cross-Cancer Genome-Wide Analysis of Lung, Ovary, Breast, Prostate, and Colorectal Cancer Reveals Novel Pleiotropic Associations.	Cancer	5,020 European ancestry lung cancer cases, 3,718 European ancestry lung adenocarcinoma cases, 3,422 European ancestry lung squamous cell carcinoma cases, 15,414 European ancestry colorectal cancer cases, 10,809 European ancestry breast cancer cases, 4,939 European ancestry estrogen receptor negative breast cancer cases, 1,098 European ancestry ovarian cancer cases, 2,556 European ancestry serous …	NA	1q22	GBAP1
chr1	155190253	155190254	rs2990220	Takeuchi F	2018-11-28	Interethnic analyses of blood pressure loci in populations of East Asian and European descent.	Systolic blood pressure	130,777 Japanese ancestry individuals	53,008 East Asian individuals, 105,253 European ancestry individuals	1q22	NR	(East Asian)
chr1	155190253	155190254	rs2990220	Takeuchi F	2018-11-28	Interethnic analyses of blood pressure loci in populations of East Asian and European descent.	Mean arterial pressure	130,777 Japanese ancestry individuals	53,008 East Asian individuals, 105,253 European ancestry individuals	1q22	NR	(East Asian)
chr1	155190253	155190254	rs2990220	Takeuchi F	2018-11-28	Interethnic analyses of blood pressure loci in populations of East Asian and European descent.	Diastolic blood pressure	130,777 Japanese ancestry individuals	53,008 East Asian individuals, 105,253 European ancestry individuals	1q22	NR	(East Asian)
chr1	155194014	155194015	rs78973538	Ellinghaus D	2016-03-14	Analysis of five chronic inflammatory diseases identifies 27 new associations and highlights disease-specific patterns at shared loci.	Chronic inflammatory diseases (ankylosing spondylitis, Crohn's disease, psoriasis, primary sclerosing cholangitis, ulcerative colitis) (pleiotropy)	8,726 European ancestry ankylosing spondylitis cases, 19,085 European ancestry Crohn's disease cases, 6,530 European ancestry psoriasis cases, 3,408 European ancestry primary sclerosing cholangitis cases, 14,513 European ancestry ulcerative colitis cases, 34,213 European ancestry controls	NA	1q22	GBAP1	(subset analysis)
chr1	155194979	155194980	rs2049805	Okada Y	2012-07-15	Meta-analysis identifies multiple loci associated with kidney function-related traits in east Asian populations.	Renal function-related traits (BUN)	39,717 East Asian ancestry individuals	17,461 East Asian ancestry individuals	1q22	MTX1, GBA
chr1	155197267	155197268	rs2974929	Kanai M	2018-02-05	Genetic analysis of quantitative traits in the Japanese population links cell types to complex human diseases.	Blood urea nitrogen levels	139,818 Japanese ancestry individuals	NA	1q22	GBAP1
chr1	155197461	155197462	rs2990245	Zhao B	2019-11-01	Genome-wide association analysis of 19,629 individuals identifies variants influencing regional brain volumes and refines their genetic co-architecture with cognitive and mental health traits.	Brain region volumes	19,629 British ancestry individuals	NA	1q22	NR	(white matter)
chr1	155197601	155197602	rs2990246	Kanai M	2018-02-05	Genetic analysis of quantitative traits in the Japanese population links cell types to complex human diseases.	Glomerular filtration rate	143,658 Japanese ancestry individuals	NA	1q22	GBAP1
chr1	155197601	155197602	rs2990246	Kanai M	2018-02-05	Genetic analysis of quantitative traits in the Japanese population links cell types to complex human diseases.	Creatinine levels	142,097 Japanese ancestry individuals	NA	1q22	GBAP1
chr1	155204792	155204793	rs75822236	Hong EP	2019-02-25	Genomic Variations in Susceptibility to Intracranial Aneurysm in the Korean Population.	Intracranial aneurysm	250 Korean ancestry cases, 296 Korean ancestry controls	NA	1q22	GBA
chr1	155205633	155205634	rs76763715	Nalls MA	2019-12-01	Identification of novel risk loci, causal insights, and heritable risk for Parkinson's disease: a meta-analysis of genome-wide association studies.	Parkinson's disease or first degree relation to individual with Parkinson's disease	15,056 European ancestry cases, 18,618 European ancestry proxy cases, 449,056 European ancestry controls	22,632 European ancestry cases, 968,735 European ancestry controls	1q22	GBAP1
chr1	155206166	155206167	rs2230288	Pickrell JK	2016-05-16	Detection and interpretation of shared genetic influences on 42 human traits.	Parkinson's disease	9,619 European ancestry cases, 324,522 European ancestry controls	NA	1q22	GBA
chr1	155218364	155218365	rs734073	Karlsson Linner R	2019-01-14	Genome-wide association analyses of risk tolerance and risky behaviors in over 1 million individuals identify hundreds of loci and shared genetic influences.	Adventurousness	557,923 European ancestry individuals	NA	1q22	FAM189B
chr1	155230705	155230706	rs60762712	Vuckovic D	2020-09-01	The Polygenic and Monogenic Basis of Blood Traits and Diseases.	Red cell distribution width	408,112 British individuals	NA	1q22	SCAMP3
chr1	155256230	155256231	rs12724449	Kichaev G	2018-12-27	Leveraging Polygenic Functional Enrichment to Improve GWAS Power.	Red cell distribution width	approximately 445,000 European ancestry individuals	NA	1q22
chr1	155260381	155260382	rs61755431	Vuckovic D	2020-09-01	The Polygenic and Monogenic Basis of Blood Traits and Diseases.	Reticulocyte fraction of red cells	408,112 British individuals	NA	1q22	PKLR
chr1	155260381	155260382	rs61755431	Auer PL	2014-04-28	Rare and low-frequency coding variants in CXCR2 and other genes are associated with hematological traits.	Hemoglobin levels	24,814 European ancestry individuals	6,526 European ancestry individuals	1q22	PKLR
chr1	155261635	155261636	rs113403872	Vuckovic D	2020-09-01	The Polygenic and Monogenic Basis of Blood Traits and Diseases.	Red blood cell count	408,112 British individuals	NA	1q22	PKLR
chr1	155261635	155261636	rs113403872	Vuckovic D	2020-09-01	The Polygenic and Monogenic Basis of Blood Traits and Diseases.	Hemoglobin	408,112 British individuals	NA	1q22	PKLR
chr1	155261635	155261636	rs113403872	Vuckovic D	2020-09-01	The Polygenic and Monogenic Basis of Blood Traits and Diseases.	Hematocrit	408,112 British individuals	NA	1q22	PKLR
chr1	155261708	155261709	rs116100695	Vuckovic D	2020-09-01	The Polygenic and Monogenic Basis of Blood Traits and Diseases.	Reticulocyte fraction of red cells	408,112 British individuals	NA	1q22	PKLR
chr1	155261708	155261709	rs116100695	Vuckovic D	2020-09-01	The Polygenic and Monogenic Basis of Blood Traits and Diseases.	Reticulocyte count	408,112 British individuals	NA	1q22	PKLR
chr1	155261708	155261709	rs116100695	Vuckovic D	2020-09-01	The Polygenic and Monogenic Basis of Blood Traits and Diseases.	Red blood cell count	408,112 British individuals	NA	1q22	PKLR
chr1	155261708	155261709	rs116100695	Vuckovic D	2020-09-01	The Polygenic and Monogenic Basis of Blood Traits and Diseases.	Immature fraction of reticulocytes	408,112 British individuals	NA	1q22	PKLR
chr1	155261708	155261709	rs116100695	Vuckovic D	2020-09-01	The Polygenic and Monogenic Basis of Blood Traits and Diseases.	High light scatter reticulocyte percentage of red cells	408,112 British individuals	NA	1q22	PKLR
chr1	155261708	155261709	rs116100695	Vuckovic D	2020-09-01	The Polygenic and Monogenic Basis of Blood Traits and Diseases.	High light scatter reticulocyte count	408,112 British individuals	NA	1q22	PKLR
chr1	155261708	155261709	rs116100695	Vuckovic D	2020-09-01	The Polygenic and Monogenic Basis of Blood Traits and Diseases.	Hemoglobin	408,112 British individuals	NA	1q22	PKLR
chr1	155261708	155261709	rs116100695	Vuckovic D	2020-09-01	The Polygenic and Monogenic Basis of Blood Traits and Diseases.	Hematocrit	408,112 British individuals	NA	1q22	PKLR
chr1	155261708	155261709	rs116100695	Astle WJ	2016-11-17	The Allelic Landscape of Human Blood Cell Trait Variation and Links to Common Complex Disease.	Reticulocyte fraction of red cells	170,690 European ancestry individuals	NA	1q22	PKLR
chr1	155261708	155261709	rs116100695	Astle WJ	2016-11-17	The Allelic Landscape of Human Blood Cell Trait Variation and Links to Common Complex Disease.	Reticulocyte count	170,641 European ancestry individuals	NA	1q22	PKLR
chr1	155261708	155261709	rs116100695	Astle WJ	2016-11-17	The Allelic Landscape of Human Blood Cell Trait Variation and Links to Common Complex Disease.	High light scatter reticulocyte percentage of red cells	170,763 European ancestry individuals	NA	1q22	PKLR
chr1	155261708	155261709	rs116100695	Astle WJ	2016-11-17	The Allelic Landscape of Human Blood Cell Trait Variation and Links to Common Complex Disease.	High light scatter reticulocyte count	170,761 European ancestry individuals	NA	1q22	PKLR
chr1	155266608	155266609	rs115736167	Hall LS	2018-01-10	Genome-wide meta-analyses of stratified depression in Generation Scotland and UK Biobank.	Major depressive disorder	6,997 European ancestry female cases, 16,172 European ancestry female controls, 3,852 European ancestry male cases, 16,034 European ancestry male controls	NA	1q22	PKLR	(males)
chr1	155268130	155268131	rs180921974	Hernandez Cordero AI	2019-11-21	Genome-wide Associations Reveal Human-Mouse Genetic Convergence and Modifiers of Myogenesis, CPNE1 and STC2.	Appendicular lean mass	181,862 European ancestry elderly individuals	NA	1q22	NR
chr1	155268130	155268131	rs180921974	Rask-Andersen M	2019-01-21	Genome-wide association study of body fat distribution identifies adiposity loci and sex-specific genetic effects.	Body fat distribution (trunk fat ratio)	55,006 British ancestry males, 61,132 British ancestry females	112,425 British ancestry males, 133,936 British ancestry females	1q22	ADAM15, ARHGEF2, ASH1L, C1orf2, C1orf104, CKS1B, CLK2, DAP3, DCST1, DCST2, DPM3, EFNA1, EFNA3, EFNA4, FDPS, FLAD1, GBA, GON4L, HCN3, KIAA0907, KRTCAP2, LENEP, MAPBPIP, MSTO1, MTX1, MUC1, PBXIP1, PKLR, PMVK, PYGO2, RAG1AP1, RIT1, RUSC1, RXFP4, SCAMP3, SHC1, SSR2, SYT11, THBS3, TRIM46, UBQLN4, YY1AP1, ZBTB7B
chr1	155268130	155268131	rs180921974	Rask-Andersen M	2019-01-21	Genome-wide association study of body fat distribution identifies adiposity loci and sex-specific genetic effects.	Body fat distribution (trunk fat ratio)	55,006 British ancestry males, 61,132 British ancestry females	112,425 British ancestry males, 133,936 British ancestry females	1q22	ADAM15, ARHGEF2, ASH1L, C1orf2, C1orf104, CKS1B, CLK2, DAP3, DCST1, DCST2, DPM3, EFNA1, EFNA3, EFNA4, FDPS, FLAD1, GBA, GON4L, HCN3, KIAA0907, KRTCAP2, LENEP, MAPBPIP, MSTO1, MTX1, MUC1, PBXIP1, PKLR, PMVK, PYGO2, RAG1AP1, RIT1, RUSC1, RXFP4, SCAMP3, SHC1, SSR2, SYT11, THBS3, TRIM46, UBQLN4, YY1AP1, ZBTB7B	(females)
chr1	155268130	155268131	rs180921974	Rask-Andersen M	2019-01-21	Genome-wide association study of body fat distribution identifies adiposity loci and sex-specific genetic effects.	Body fat distribution (trunk fat ratio)	55,006 British ancestry males, 61,132 British ancestry females	112,425 British ancestry males, 133,936 British ancestry females	1q22	ADAM15, ARHGEF2, ASH1L, C1orf2, C1orf104, CKS1B, CLK2, DAP3, DCST1, DCST2, DPM3, EFNA1, EFNA3, EFNA4, FDPS, FLAD1, GBA, GON4L, HCN3, KIAA0907, KRTCAP2, LENEP, MAPBPIP, MSTO1, MTX1, MUC1, PBXIP1, PKLR, PMVK, PYGO2, RAG1AP1, RIT1, RUSC1, RXFP4, SCAMP3, SHC1, SSR2, SYT11, THBS3, TRIM46, UBQLN4, YY1AP1, ZBTB7B	(males)
chr1	155268130	155268131	rs180921974	Rask-Andersen M	2019-01-21	Genome-wide association study of body fat distribution identifies adiposity loci and sex-specific genetic effects.	Body fat distribution (leg fat ratio)	55,006 British ancestry males, 61,132 British ancestry females	112,425 British ancestry males, 133,936 British ancestry females	1q22	ADAM15, ARHGEF2, ASH1L, C1orf2, C1orf104, CKS1B, CLK2, DAP3, DCST1, DCST2, DPM3, EFNA1, EFNA3, EFNA4, FDPS, FLAD1, GBA, GON4L, HCN3, KIAA0907, KRTCAP2, LENEP, MAPBPIP, MSTO1, MTX1, MUC1, PBXIP1, PKLR, PMVK, PYGO2, RAG1AP1, RIT1, RUSC1, RXFP4, SCAMP3, SHC1, SSR2, SYT11, THBS3, TRIM46, UBQLN4, YY1AP1, ZBTB7B	(females)
chr1	155268130	155268131	rs180921974	Rask-Andersen M	2019-01-21	Genome-wide association study of body fat distribution identifies adiposity loci and sex-specific genetic effects.	Body fat distribution (leg fat ratio)	55,006 British ancestry males, 61,132 British ancestry females	112,425 British ancestry males, 133,936 British ancestry females	1q22	ADAM15, ARHGEF2, ASH1L, C1orf2, C1orf104, CKS1B, CLK2, DAP3, DCST1, DCST2, DPM3, EFNA1, EFNA3, EFNA4, FDPS, FLAD1, GBA, GON4L, HCN3, KIAA0907, KRTCAP2, LENEP, MAPBPIP, MSTO1, MTX1, MUC1, PBXIP1, PKLR, PMVK, PYGO2, RAG1AP1, RIT1, RUSC1, RXFP4, SCAMP3, SHC1, SSR2, SYT11, THBS3, TRIM46, UBQLN4, YY1AP1, ZBTB7B	(males)
chr1	155268130	155268131	rs180921974	Rask-Andersen M	2019-01-21	Genome-wide association study of body fat distribution identifies adiposity loci and sex-specific genetic effects.	Body fat distribution (leg fat ratio)	55,006 British ancestry males, 61,132 British ancestry females	112,425 British ancestry males, 133,936 British ancestry females	1q22	ADAM15, ARHGEF2, ASH1L, C1orf2, C1orf104, CKS1B, CLK2, DAP3, DCST1, DCST2, DPM3, EFNA1, EFNA3, EFNA4, FDPS, FLAD1, GBA, GON4L, HCN3, KIAA0907, KRTCAP2, LENEP, MAPBPIP, MSTO1, MTX1, MUC1, PBXIP1, PKLR, PMVK, PYGO2, RAG1AP1, RIT1, RUSC1, RXFP4, SCAMP3, SHC1, SSR2, SYT11, THBS3, TRIM46, UBQLN4, YY1AP1, ZBTB7B
chr1	155269775	155269776	rs3020781	Vujkovic M	2020-06-15	Discovery of 318 new risk loci for type 2 diabetes and related vascular outcomes among 1.4 million participants in a multi-ancestry meta-analysis.	Type 2 diabetes	148,726 European ancestry cases, 965,732 European ancestry controls	NA	1q22	NR
chr1	155269775	155269776	rs3020781	Vujkovic M	2020-06-15	Discovery of 318 new risk loci for type 2 diabetes and related vascular outcomes among 1.4 million participants in a multi-ancestry meta-analysis.	Type 2 diabetes	148,726 European ancestry cases, 24,646 African American cases, 8,616 Hispanic cases, 46,511 Asian ancestry cases, 965,732 European ancestry controls, 31,446 African American controls, 11,829 Hispanic controls, 169,776 Asian ancestry controls	NA	1q22	NR
chr1	155271433	155271434	rs141119689	Astle WJ	2016-11-17	The Allelic Landscape of Human Blood Cell Trait Variation and Links to Common Complex Disease.	Reticulocyte fraction of red cells	170,690 European ancestry individuals	NA	1q22	PKLR
chr1	155271433	155271434	rs141119689	Astle WJ	2016-11-17	The Allelic Landscape of Human Blood Cell Trait Variation and Links to Common Complex Disease.	Reticulocyte count	170,641 European ancestry individuals	NA	1q22	PKLR
chr1	155271433	155271434	rs141119689	Astle WJ	2016-11-17	The Allelic Landscape of Human Blood Cell Trait Variation and Links to Common Complex Disease.	High light scatter reticulocyte percentage of red cells	170,763 European ancestry individuals	NA	1q22	PKLR
chr1	155271433	155271434	rs141119689	Astle WJ	2016-11-17	The Allelic Landscape of Human Blood Cell Trait Variation and Links to Common Complex Disease.	High light scatter reticulocyte count	170,761 European ancestry individuals	NA	1q22	PKLR
chr1	155272273	155272274	rs7524950	Michailidou K	2017-10-23	Association analysis identifies 65 new breast cancer risk loci.	Breast cancer	76,192 European ancestry cases, 63,082 European ancestry controls	46,785 European ancestry cases, 42,892 European ancestry controls, 14,068 East Asian ancestry cases, 13,104 East Asian ancestry controls	1q22	NR	(EA)
chr1	155284585	155284586	rs11264360	Manousaki D	2020-02-05	Genome-wide Association Study for Vitamin D Levels Reveals 69 Independent Loci.	Serum 25-Hydroxyvitamin D levels	443,734 European ancestry individuals	NA	1q22	NR
chr1	155289544	155289545	rs11264361	Revez JA	2020-04-02	Genome-wide association study identifies 143 loci associated with 25 hydroxyvitamin D concentration.	Serum 25-Hydroxyvitamin D levels	496,946 European ancestry individuals	NA	1q22
chr1	155303096	155303097	rs151026328	Zhu Z	2019-10-24	Shared Genetic and Experimental Links between Obesity-Related Traits and Asthma Subtypes in UK Biobank.	Body mass index	457,822 European ancestry individuals	NA	1q22	NR
chr1	155303106	155303107	rs140959946	Zhu Z	2019-10-24	Shared Genetic and Experimental Links between Obesity-Related Traits and Asthma Subtypes in UK Biobank.	Waist-to-hip ratio adjusted for BMI	457,690 European ancestry individuals	NA	1q22	NR
chr1	155388850	155388851	rs12734374	Rongve A	2019-05-07	GBA and APOE ?4 associate with sporadic dementia with Lewy bodies in European genome wide association study.	Dementia with Lewy bodies	720 European ancestry cases, 6,490 European ancestry controls	108 European ancestry cases, 75,545 European ancestry controls	1q22	ASH1L, GBA
chr1	155388850	155388851	rs12734374	Kichaev G	2018-12-27	Leveraging Polygenic Functional Enrichment to Improve GWAS Power.	Red blood cell count	approximately 445,000 European ancestry individuals	NA	1q22
chr1	155389687	155389688	rs10908465	Revez JA	2020-04-02	Genome-wide association study identifies 143 loci associated with 25 hydroxyvitamin D concentration.	Serum 25-Hydroxyvitamin D levels	417,580 European ancestry individuals	NA	1q22
chr1	155399291	155399292	rs7514174	Lee JJ	2018-07-23	Gene discovery and polygenic prediction from a genome-wide association study of educational attainment in 1.1 million individuals.	Self-reported math ability	564,698 European ancestry individuals	NA	1q22	Intergenic
chr1	155416327	155416328	rs10796944	Michailidou K	2017-10-23	Association analysis identifies 65 new breast cancer risk loci.	Breast cancer	76,192 European ancestry cases, 63,082 European ancestry controls	46,785 European ancestry cases, 42,892 European ancestry controls, 14,068 East Asian ancestry cases, 13,104 East Asian ancestry controls	1q22	NR	(EA)
chr1	155435095	155435096	rs553470220	Hernandez Cordero AI	2019-11-21	Genome-wide Associations Reveal Human-Mouse Genetic Convergence and Modifiers of Myogenesis, CPNE1 and STC2.	Appendicular lean mass	181,862 European ancestry elderly individuals	NA	1q22	NR
chr1	155448414	155448415	rs13373934	Sanders AE	2016-09-06	Chronic Periodontitis Genome-wide Association Study in the Hispanic Community Health Study / Study of Latinos.	Chronic periodontitis (mean interproximal clinical attachment level)	10,935 Hispanic individuals	4,402 European ancestry individuals, 908 African American individuals	1q22	ASH1L
chr1	155459154	155459155	rs61812092	Zhu Z	2019-10-24	Shared Genetic and Experimental Links between Obesity-Related Traits and Asthma Subtypes in UK Biobank.	Body mass index	457,822 European ancestry individuals	NA	1q22	NR
chr1	155484429	155484430	rs77350683	Vuckovic D	2020-09-01	The Polygenic and Monogenic Basis of Blood Traits and Diseases.	Reticulocyte fraction of red cells	408,112 British individuals	NA	1q22	ASH1L
chr1	155484429	155484430	rs77350683	Vuckovic D	2020-09-01	The Polygenic and Monogenic Basis of Blood Traits and Diseases.	Reticulocyte count	408,112 British individuals	NA	1q22	ASH1L
chr1	155484429	155484430	rs77350683	Vuckovic D	2020-09-01	The Polygenic and Monogenic Basis of Blood Traits and Diseases.	High light scatter reticulocyte percentage of red cells	408,112 British individuals	NA	1q22	ASH1L
chr1	155484429	155484430	rs77350683	Vuckovic D	2020-09-01	The Polygenic and Monogenic Basis of Blood Traits and Diseases.	High light scatter reticulocyte count	408,112 British individuals	NA	1q22	ASH1L
chr1	155485026	155485027	rs80142782	Wang Z	2015-12-23	Identification of new susceptibility loci for gastric non-cardia adenocarcinoma: pooled results from two Chinese genome-wide association studies.	Non-cardia gastric cancer	2,031 Han Chinese ancestry cases, 4,970 Han Chinese ancestry controls	3,564 Han Chinese ancestry cases, 4,637 Han Chinese ancestry controls	1q22	ASH1L
chr1	155538488	155538489	rs139932136	Hernandez Cordero AI	2019-11-21	Genome-wide Associations Reveal Human-Mouse Genetic Convergence and Modifiers of Myogenesis, CPNE1 and STC2.	Appendicular lean mass	181,862 European ancestry elderly individuals	NA	1q22	NR
chr1	155556970	155556971	rs12091730	Michailidou K	2017-10-23	Association analysis identifies 65 new breast cancer risk loci.	Breast cancer	76,192 European ancestry cases, 63,082 European ancestry controls	46,785 European ancestry cases, 42,892 European ancestry controls, 14,068 East Asian ancestry cases, 13,104 East Asian ancestry controls	1q22	NR	(EA)
chr1	155578041	155578042	rs35202981	Casanova F	2019-10-20	A genome-wide association study implicates multiple mechanisms influencing raised urinary albumin-creatinine ratio.	Urinary albumin-to-creatinine ratio	437,027 European ancestry individuals	60,130 individuals	1q22	MSTO1	(EA)
chr1	155584193	155584194	rs564968560	Olafsson S	2019-10-30	Common and rare sequence variants influencing tumor biomarkers in blood.	Serum cancer antigen 15.3 levels	7,107 Icelandic ancestry individuals	NA	1q22	MSTO1
chr1	155640114	155640115	rs41264945	Ruth KS	2020-02-10	Using human genetics to understand the disease impacts of testosterone in men and women.	Bioavailable testosterone levels	382,988 European ancestry individuals	NA	1q22	NR
chr1	155640114	155640115	rs41264945	Kichaev G	2018-12-27	Leveraging Polygenic Functional Enrichment to Improve GWAS Power.	Height	approximately 458,000 European ancestry individuals	NA	1q22
chr1	155661718	155661719	rs146554560	Hernandez Cordero AI	2019-11-21	Genome-wide Associations Reveal Human-Mouse Genetic Convergence and Modifiers of Myogenesis, CPNE1 and STC2.	Appendicular lean mass	181,862 European ancestry elderly individuals	NA	1q22	NR
chr1	155666960	155666961	rs348196	Michailidou K	2017-10-23	Association analysis identifies 65 new breast cancer risk loci.	Breast cancer	76,192 European ancestry cases, 63,082 European ancestry controls	46,785 European ancestry cases, 42,892 European ancestry controls, 14,068 East Asian ancestry cases, 13,104 East Asian ancestry controls	1q22	NR	(EA)
# region=chr1:155241306-156241305												Header
chr1	155256230	155256231	rs12724449	Kichaev G	2018-12-27	Leveraging Polygenic Functional Enrichment to Improve GWAS Power.	Red cell distribution width	approximately 445,000 European ancestry individuals	NA	1q22
chr1	155260381	155260382	rs61755431	Vuckovic D	2020-09-01	The Polygenic and Monogenic Basis of Blood Traits and Diseases.	Reticulocyte fraction of red cells	408,112 British individuals	NA	1q22	PKLR
chr1	155260381	155260382	rs61755431	Auer PL	2014-04-28	Rare and low-frequency coding variants in CXCR2 and other genes are associated with hematological traits.	Hemoglobin levels	24,814 European ancestry individuals	6,526 European ancestry individuals	1q22	PKLR
chr1	155261635	155261636	rs113403872	Vuckovic D	2020-09-01	The Polygenic and Monogenic Basis of Blood Traits and Diseases.	Red blood cell count	408,112 British individuals	NA	1q22	PKLR
chr1	155261635	155261636	rs113403872	Vuckovic D	2020-09-01	The Polygenic and Monogenic Basis of Blood Traits and Diseases.	Hemoglobin	408,112 British individuals	NA	1q22	PKLR
chr1	155261635	155261636	rs113403872	Vuckovic D	2020-09-01	The Polygenic and Monogenic Basis of Blood Traits and Diseases.	Hematocrit	408,112 British individuals	NA	1q22	PKLR
chr1	155261708	155261709	rs116100695	Vuckovic D	2020-09-01	The Polygenic and Monogenic Basis of Blood Traits and Diseases.	Reticulocyte fraction of red cells	408,112 British individuals	NA	1q22	PKLR
chr1	155261708	155261709	rs116100695	Vuckovic D	2020-09-01	The Polygenic and Monogenic Basis of Blood Traits and Diseases.	Reticulocyte count	408,112 British individuals	NA	1q22	PKLR
chr1	155261708	155261709	rs116100695	Vuckovic D	2020-09-01	The Polygenic and Monogenic Basis of Blood Traits and Diseases.	Red blood cell count	408,112 British individuals	NA	1q22	PKLR
chr1	155261708	155261709	rs116100695	Vuckovic D	2020-09-01	The Polygenic and Monogenic Basis of Blood Traits and Diseases.	Immature fraction of reticulocytes	408,112 British individuals	NA	1q22	PKLR
chr1	155261708	155261709	rs116100695	Vuckovic D	2020-09-01	The Polygenic and Monogenic Basis of Blood Traits and Diseases.	High light scatter reticulocyte percentage of red cells	408,112 British individuals	NA	1q22	PKLR
chr1	155261708	155261709	rs116100695	Vuckovic D	2020-09-01	The Polygenic and Monogenic Basis of Blood Traits and Diseases.	High light scatter reticulocyte count	408,112 British individuals	NA	1q22	PKLR
chr1	155261708	155261709	rs116100695	Vuckovic D	2020-09-01	The Polygenic and Monogenic Basis of Blood Traits and Diseases.	Hemoglobin	408,112 British individuals	NA	1q22	PKLR
chr1	155261708	155261709	rs116100695	Vuckovic D	2020-09-01	The Polygenic and Monogenic Basis of Blood Traits and Diseases.	Hematocrit	408,112 British individuals	NA	1q22	PKLR
chr1	155261708	155261709	rs116100695	Astle WJ	2016-11-17	The Allelic Landscape of Human Blood Cell Trait Variation and Links to Common Complex Disease.	Reticulocyte fraction of red cells	170,690 European ancestry individuals	NA	1q22	PKLR
chr1	155261708	155261709	rs116100695	Astle WJ	2016-11-17	The Allelic Landscape of Human Blood Cell Trait Variation and Links to Common Complex Disease.	Reticulocyte count	170,641 European ancestry individuals	NA	1q22	PKLR
chr1	155261708	155261709	rs116100695	Astle WJ	2016-11-17	The Allelic Landscape of Human Blood Cell Trait Variation and Links to Common Complex Disease.	High light scatter reticulocyte percentage of red cells	170,763 European ancestry individuals	NA	1q22	PKLR
chr1	155261708	155261709	rs116100695	Astle WJ	2016-11-17	The Allelic Landscape of Human Blood Cell Trait Variation and Links to Common Complex Disease.	High light scatter reticulocyte count	170,761 European ancestry individuals	NA	1q22	PKLR
chr1	155266608	155266609	rs115736167	Hall LS	2018-01-10	Genome-wide meta-analyses of stratified depression in Generation Scotland and UK Biobank.	Major depressive disorder	6,997 European ancestry female cases, 16,172 European ancestry female controls, 3,852 European ancestry male cases, 16,034 European ancestry male controls	NA	1q22	PKLR	(males)
chr1	155268130	155268131	rs180921974	Hernandez Cordero AI	2019-11-21	Genome-wide Associations Reveal Human-Mouse Genetic Convergence and Modifiers of Myogenesis, CPNE1 and STC2.	Appendicular lean mass	181,862 European ancestry elderly individuals	NA	1q22	NR
chr1	155268130	155268131	rs180921974	Rask-Andersen M	2019-01-21	Genome-wide association study of body fat distribution identifies adiposity loci and sex-specific genetic effects.	Body fat distribution (trunk fat ratio)	55,006 British ancestry males, 61,132 British ancestry females	112,425 British ancestry males, 133,936 British ancestry females	1q22	ADAM15, ARHGEF2, ASH1L, C1orf2, C1orf104, CKS1B, CLK2, DAP3, DCST1, DCST2, DPM3, EFNA1, EFNA3, EFNA4, FDPS, FLAD1, GBA, GON4L, HCN3, KIAA0907, KRTCAP2, LENEP, MAPBPIP, MSTO1, MTX1, MUC1, PBXIP1, PKLR, PMVK, PYGO2, RAG1AP1, RIT1, RUSC1, RXFP4, SCAMP3, SHC1, SSR2, SYT11, THBS3, TRIM46, UBQLN4, YY1AP1, ZBTB7B
chr1	155268130	155268131	rs180921974	Rask-Andersen M	2019-01-21	Genome-wide association study of body fat distribution identifies adiposity loci and sex-specific genetic effects.	Body fat distribution (trunk fat ratio)	55,006 British ancestry males, 61,132 British ancestry females	112,425 British ancestry males, 133,936 British ancestry females	1q22	ADAM15, ARHGEF2, ASH1L, C1orf2, C1orf104, CKS1B, CLK2, DAP3, DCST1, DCST2, DPM3, EFNA1, EFNA3, EFNA4, FDPS, FLAD1, GBA, GON4L, HCN3, KIAA0907, KRTCAP2, LENEP, MAPBPIP, MSTO1, MTX1, MUC1, PBXIP1, PKLR, PMVK, PYGO2, RAG1AP1, RIT1, RUSC1, RXFP4, SCAMP3, SHC1, SSR2, SYT11, THBS3, TRIM46, UBQLN4, YY1AP1, ZBTB7B	(females)
chr1	155268130	155268131	rs180921974	Rask-Andersen M	2019-01-21	Genome-wide association study of body fat distribution identifies adiposity loci and sex-specific genetic effects.	Body fat distribution (trunk fat ratio)	55,006 British ancestry males, 61,132 British ancestry females	112,425 British ancestry males, 133,936 British ancestry females	1q22	ADAM15, ARHGEF2, ASH1L, C1orf2, C1orf104, CKS1B, CLK2, DAP3, DCST1, DCST2, DPM3, EFNA1, EFNA3, EFNA4, FDPS, FLAD1, GBA, GON4L, HCN3, KIAA0907, KRTCAP2, LENEP, MAPBPIP, MSTO1, MTX1, MUC1, PBXIP1, PKLR, PMVK, PYGO2, RAG1AP1, RIT1, RUSC1, RXFP4, SCAMP3, SHC1, SSR2, SYT11, THBS3, TRIM46, UBQLN4, YY1AP1, ZBTB7B	(males)
chr1	155268130	155268131	rs180921974	Rask-Andersen M	2019-01-21	Genome-wide association study of body fat distribution identifies adiposity loci and sex-specific genetic effects.	Body fat distribution (leg fat ratio)	55,006 British ancestry males, 61,132 British ancestry females	112,425 British ancestry males, 133,936 British ancestry females	1q22	ADAM15, ARHGEF2, ASH1L, C1orf2, C1orf104, CKS1B, CLK2, DAP3, DCST1, DCST2, DPM3, EFNA1, EFNA3, EFNA4, FDPS, FLAD1, GBA, GON4L, HCN3, KIAA0907, KRTCAP2, LENEP, MAPBPIP, MSTO1, MTX1, MUC1, PBXIP1, PKLR, PMVK, PYGO2, RAG1AP1, RIT1, RUSC1, RXFP4, SCAMP3, SHC1, SSR2, SYT11, THBS3, TRIM46, UBQLN4, YY1AP1, ZBTB7B	(females)
chr1	155268130	155268131	rs180921974	Rask-Andersen M	2019-01-21	Genome-wide association study of body fat distribution identifies adiposity loci and sex-specific genetic effects.	Body fat distribution (leg fat ratio)	55,006 British ancestry males, 61,132 British ancestry females	112,425 British ancestry males, 133,936 British ancestry females	1q22	ADAM15, ARHGEF2, ASH1L, C1orf2, C1orf104, CKS1B, CLK2, DAP3, DCST1, DCST2, DPM3, EFNA1, EFNA3, EFNA4, FDPS, FLAD1, GBA, GON4L, HCN3, KIAA0907, KRTCAP2, LENEP, MAPBPIP, MSTO1, MTX1, MUC1, PBXIP1, PKLR, PMVK, PYGO2, RAG1AP1, RIT1, RUSC1, RXFP4, SCAMP3, SHC1, SSR2, SYT11, THBS3, TRIM46, UBQLN4, YY1AP1, ZBTB7B	(males)
chr1	155268130	155268131	rs180921974	Rask-Andersen M	2019-01-21	Genome-wide association study of body fat distribution identifies adiposity loci and sex-specific genetic effects.	Body fat distribution (leg fat ratio)	55,006 British ancestry males, 61,132 British ancestry females	112,425 British ancestry males, 133,936 British ancestry females	1q22	ADAM15, ARHGEF2, ASH1L, C1orf2, C1orf104, CKS1B, CLK2, DAP3, DCST1, DCST2, DPM3, EFNA1, EFNA3, EFNA4, FDPS, FLAD1, GBA, GON4L, HCN3, KIAA0907, KRTCAP2, LENEP, MAPBPIP, MSTO1, MTX1, MUC1, PBXIP1, PKLR, PMVK, PYGO2, RAG1AP1, RIT1, RUSC1, RXFP4, SCAMP3, SHC1, SSR2, SYT11, THBS3, TRIM46, UBQLN4, YY1AP1, ZBTB7B
chr1	155269775	155269776	rs3020781	Vujkovic M	2020-06-15	Discovery of 318 new risk loci for type 2 diabetes and related vascular outcomes among 1.4 million participants in a multi-ancestry meta-analysis.	Type 2 diabetes	148,726 European ancestry cases, 965,732 European ancestry controls	NA	1q22	NR
chr1	155269775	155269776	rs3020781	Vujkovic M	2020-06-15	Discovery of 318 new risk loci for type 2 diabetes and related vascular outcomes among 1.4 million participants in a multi-ancestry meta-analysis.	Type 2 diabetes	148,726 European ancestry cases, 24,646 African American cases, 8,616 Hispanic cases, 46,511 Asian ancestry cases, 965,732 European ancestry controls, 31,446 African American controls, 11,829 Hispanic controls, 169,776 Asian ancestry controls	NA	1q22	NR
chr1	155271433	155271434	rs141119689	Astle WJ	2016-11-17	The Allelic Landscape of Human Blood Cell Trait Variation and Links to Common Complex Disease.	Reticulocyte fraction of red cells	170,690 European ancestry individuals	NA	1q22	PKLR
chr1	155271433	155271434	rs141119689	Astle WJ	2016-11-17	The Allelic Landscape of Human Blood Cell Trait Variation and Links to Common Complex Disease.	Reticulocyte count	170,641 European ancestry individuals	NA	1q22	PKLR
chr1	155271433	155271434	rs141119689	Astle WJ	2016-11-17	The Allelic Landscape of Human Blood Cell Trait Variation and Links to Common Complex Disease.	High light scatter reticulocyte percentage of red cells	170,763 European ancestry individuals	NA	1q22	PKLR
chr1	155271433	155271434	rs141119689	Astle WJ	2016-11-17	The Allelic Landscape of Human Blood Cell Trait Variation and Links to Common Complex Disease.	High light scatter reticulocyte count	170,761 European ancestry individuals	NA	1q22	PKLR
chr1	155272273	155272274	rs7524950	Michailidou K	2017-10-23	Association analysis identifies 65 new breast cancer risk loci.	Breast cancer	76,192 European ancestry cases, 63,082 European ancestry controls	46,785 European ancestry cases, 42,892 European ancestry controls, 14,068 East Asian ancestry cases, 13,104 East Asian ancestry controls	1q22	NR	(EA)
chr1	155284585	155284586	rs11264360	Manousaki D	2020-02-05	Genome-wide Association Study for Vitamin D Levels Reveals 69 Independent Loci.	Serum 25-Hydroxyvitamin D levels	443,734 European ancestry individuals	NA	1q22	NR
chr1	155289544	155289545	rs11264361	Revez JA	2020-04-02	Genome-wide association study identifies 143 loci associated with 25 hydroxyvitamin D concentration.	Serum 25-Hydroxyvitamin D levels	496,946 European ancestry individuals	NA	1q22
chr1	155303096	155303097	rs151026328	Zhu Z	2019-10-24	Shared Genetic and Experimental Links between Obesity-Related Traits and Asthma Subtypes in UK Biobank.	Body mass index	457,822 European ancestry individuals	NA	1q22	NR
chr1	155303106	155303107	rs140959946	Zhu Z	2019-10-24	Shared Genetic and Experimental Links between Obesity-Related Traits and Asthma Subtypes in UK Biobank.	Waist-to-hip ratio adjusted for BMI	457,690 European ancestry individuals	NA	1q22	NR
chr1	155388850	155388851	rs12734374	Rongve A	2019-05-07	GBA and APOE ?4 associate with sporadic dementia with Lewy bodies in European genome wide association study.	Dementia with Lewy bodies	720 European ancestry cases, 6,490 European ancestry controls	108 European ancestry cases, 75,545 European ancestry controls	1q22	ASH1L, GBA
chr1	155388850	155388851	rs12734374	Kichaev G	2018-12-27	Leveraging Polygenic Functional Enrichment to Improve GWAS Power.	Red blood cell count	approximately 445,000 European ancestry individuals	NA	1q22
chr1	155389687	155389688	rs10908465	Revez JA	2020-04-02	Genome-wide association study identifies 143 loci associated with 25 hydroxyvitamin D concentration.	Serum 25-Hydroxyvitamin D levels	417,580 European ancestry individuals	NA	1q22
chr1	155399291	155399292	rs7514174	Lee JJ	2018-07-23	Gene discovery and polygenic prediction from a genome-wide association study of educational attainment in 1.1 million individuals.	Self-reported math ability	564,698 European ancestry individuals	NA	1q22	Intergenic
chr1	155416327	155416328	rs10796944	Michailidou K	2017-10-23	Association analysis identifies 65 new breast cancer risk loci.	Breast cancer	76,192 European ancestry cases, 63,082 European ancestry controls	46,785 European ancestry cases, 42,892 European ancestry controls, 14,068 East Asian ancestry cases, 13,104 East Asian ancestry controls	1q22	NR	(EA)
chr1	155435095	155435096	rs553470220	Hernandez Cordero AI	2019-11-21	Genome-wide Associations Reveal Human-Mouse Genetic Convergence and Modifiers of Myogenesis, CPNE1 and STC2.	Appendicular lean mass	181,862 European ancestry elderly individuals	NA	1q22	NR
chr1	155448414	155448415	rs13373934	Sanders AE	2016-09-06	Chronic Periodontitis Genome-wide Association Study in the Hispanic Community Health Study / Study of Latinos.	Chronic periodontitis (mean interproximal clinical attachment level)	10,935 Hispanic individuals	4,402 European ancestry individuals, 908 African American individuals	1q22	ASH1L
chr1	155459154	155459155	rs61812092	Zhu Z	2019-10-24	Shared Genetic and Experimental Links between Obesity-Related Traits and Asthma Subtypes in UK Biobank.	Body mass index	457,822 European ancestry individuals	NA	1q22	NR
chr1	155484429	155484430	rs77350683	Vuckovic D	2020-09-01	The Polygenic and Monogenic Basis of Blood Traits and Diseases.	Reticulocyte fraction of red cells	408,112 British individuals	NA	1q22	ASH1L
chr1	155484429	155484430	rs77350683	Vuckovic D	2020-09-01	The Polygenic and Monogenic Basis of Blood Traits and Diseases.	Reticulocyte count	408,112 British individuals	NA	1q22	ASH1L
chr1	155484429	155484430	rs77350683	Vuckovic D	2020-09-01	The Polygenic and Monogenic Basis of Blood Traits and Diseases.	High light scatter reticulocyte percentage of red cells	408,112 British individuals	NA	1q22	ASH1L
chr1	155484429	155484430	rs77350683	Vuckovic D	2020-09-01	The Polygenic and Monogenic Basis of Blood Traits and Diseases.	High light scatter reticulocyte count	408,112 British individuals	NA	1q22	ASH1L
chr1	155485026	155485027	rs80142782	Wang Z	2015-12-23	Identification of new susceptibility loci for gastric non-cardia adenocarcinoma: pooled results from two Chinese genome-wide association studies.	Non-cardia gastric cancer	2,031 Han Chinese ancestry cases, 4,970 Han Chinese ancestry controls	3,564 Han Chinese ancestry cases, 4,637 Han Chinese ancestry controls	1q22	ASH1L
chr1	155538488	155538489	rs139932136	Hernandez Cordero AI	2019-11-21	Genome-wide Associations Reveal Human-Mouse Genetic Convergence and Modifiers of Myogenesis, CPNE1 and STC2.	Appendicular lean mass	181,862 European ancestry elderly individuals	NA	1q22	NR
chr1	155556970	155556971	rs12091730	Michailidou K	2017-10-23	Association analysis identifies 65 new breast cancer risk loci.	Breast cancer	76,192 European ancestry cases, 63,082 European ancestry controls	46,785 European ancestry cases, 42,892 European ancestry controls, 14,068 East Asian ancestry cases, 13,104 East Asian ancestry controls	1q22	NR	(EA)
chr1	155578041	155578042	rs35202981	Casanova F	2019-10-20	A genome-wide association study implicates multiple mechanisms influencing raised urinary albumin-creatinine ratio.	Urinary albumin-to-creatinine ratio	437,027 European ancestry individuals	60,130 individuals	1q22	MSTO1	(EA)
chr1	155584193	155584194	rs564968560	Olafsson S	2019-10-30	Common and rare sequence variants influencing tumor biomarkers in blood.	Serum cancer antigen 15.3 levels	7,107 Icelandic ancestry individuals	NA	1q22	MSTO1
chr1	155640114	155640115	rs41264945	Ruth KS	2020-02-10	Using human genetics to understand the disease impacts of testosterone in men and women.	Bioavailable testosterone levels	382,988 European ancestry individuals	NA	1q22	NR
chr1	155640114	155640115	rs41264945	Kichaev G	2018-12-27	Leveraging Polygenic Functional Enrichment to Improve GWAS Power.	Height	approximately 458,000 European ancestry individuals	NA	1q22
chr1	155661718	155661719	rs146554560	Hernandez Cordero AI	2019-11-21	Genome-wide Associations Reveal Human-Mouse Genetic Convergence and Modifiers of Myogenesis, CPNE1 and STC2.	Appendicular lean mass	181,862 European ancestry elderly individuals	NA	1q22	NR
chr1	155666960	155666961	rs348196	Michailidou K	2017-10-23	Association analysis identifies 65 new breast cancer risk loci.	Breast cancer	76,192 European ancestry cases, 63,082 European ancestry controls	46,785 European ancestry cases, 42,892 European ancestry controls, 14,068 East Asian ancestry cases, 13,104 East Asian ancestry controls	1q22	NR	(EA)
chr1	155682869	155682870	rs490608	Liu JZ	2015-07-20	Association analyses identify 38 susceptibility loci for inflammatory bowel disease and highlight shared genetic risk across populations.	Inflammatory bowel disease	12,882 European ancestry cases, 21,770 European ancestry controls	25,273 European ancestry cases, 26,715 European ancestry controls, 548 Iranian ancestry cases, 342 Iranian ancestry control, 1,423 Indian ancestry cases, 990 Indian ancestry controls, 2,824 East Asian ancestry cases, 3,719 East Asian ancestry controls	1q22	NR	(EA)
chr1	155690185	155690186	rs184104770	Conti DV	2021-01-04	Trans-ancestry genome-wide association meta-analysis of prostate cancer identifies new susceptibility loci and informs genetic risk prediction.	Prostate cancer	85,554 European ancestry cases, 10,368 African ancestry cases, 8,611 East Asian ancestry cases, 2,714 Hispanic cases, 91,972 European ancestry controls, 10,986 African ancestry controls, 18,809 East Asian ancestry controls, 5,239 Hispanic controls	NA	1q22	NR
chr1	155722505	155722506	rs12134456	Chen MH	2020-09-01	Trans-ethnic and Ancestry-Specific Blood-Cell Genetics in 746,667 Individuals from 5 Global Populations.	Mean corpuscular hemoglobin concentration	491,553 European ancestry individuals	NA	1q22	NR
chr1	155722505	155722506	rs12134456	Zhao B	2019-11-01	Genome-wide association analysis of 19,629 individuals identifies variants influencing regional brain volumes and refines their genetic co-architecture with cognitive and mental health traits.	Brain region volumes	19,629 British ancestry individuals	NA	1q22	NR	(white matter)
chr1	155722505	155722506	rs12134456	Tin A	2019-10-02	Target genes, variants, tissues and transcriptional pathways influencing human serum urate levels.	Urate levels	288,649 European ancestry individuals, 125,725 East Asian ancestry individuals, 33,671 African American individuals, 9,037 South Asian ancestry individuals, 608 Hispanic individuals	NA	1q22	GON4L
chr1	155722505	155722506	rs12134456	Tin A	2019-10-02	Target genes, variants, tissues and transcriptional pathways influencing human serum urate levels.	Urate levels	174,111 European, East Asian, African American, South Asian and Hispanic ancestry men, 172,102 European, East Asian, African American, South Asian and Hispanic ancestry women	NA	1q22	NR	(women)
chr1	155722505	155722506	rs12134456	Tin A	2019-10-02	Target genes, variants, tissues and transcriptional pathways influencing human serum urate levels.	Urate levels	174,111 European, East Asian, African American, South Asian and Hispanic ancestry men, 172,102 European, East Asian, African American, South Asian and Hispanic ancestry women	NA	1q22	NR	(men)
chr1	155722505	155722506	rs12134456	Wuttke M	2019-05-31	A catalog of genetic loci associated with kidney function from analyses of a million individuals.	Blood urea nitrogen levels	416,178 European and unknown ancestry individuals	NA	1q22	GON4L
chr1	155767707	155767708	rs860295	Akiyama M	2017-09-11	Genome-wide association study identifies 112 new loci for body mass index in the Japanese population.	Body mass index	up to 72,390 Japanese ancestry women, up to 85,894 Japanese ancestry men	up to 10,048 Japanese ancestry women, up to 5,098 Japanese ancestry men, up to 181,999 European ancestry women, up to 140,155 European ancestry controls	1q22	GON4L	(Japanese)
chr1	155773336	155773337	rs72706163	Armstrong NJ	2020-06-10	Common Genetic Variation Indicates Separate Causes for Periventricular and Deep White Matter Hyperintensities.	Periventricular white matter hyperintensities	16,832 European ancestry individuals, 736 African American individuals, 658 Hispanic individuals	8,428 European and unknown ancestry individuals	1q22	GON4L
chr1	155803204	155803205	rs140893634	Hernandez Cordero AI	2019-11-21	Genome-wide Associations Reveal Human-Mouse Genetic Convergence and Modifiers of Myogenesis, CPNE1 and STC2.	Appendicular lean mass	181,862 European ancestry elderly individuals	NA	1q22	NR
chr1	155816084	155816085	rs145976521	Emilsson V	2018-08-02	Co-regulatory networks of human serum proteins link genetics to disease.	Blood protein levels	3,200 European ancestry individuals	NA	1q22	SYT11	(SYT11, 7089_42_3)
chr1	155819017	155819018	rs113544820	Lee JJ	2018-07-23	Gene discovery and polygenic prediction from a genome-wide association study of educational attainment in 1.1 million individuals.	Self-reported math ability (MTAG)	670,471 European ancestry individuals	NA	1q22	Intergenic	(MTAG)
chr1	155819017	155819018	rs113544820	Lee JJ	2018-07-23	Gene discovery and polygenic prediction from a genome-wide association study of educational attainment in 1.1 million individuals.	Highest math class taken (MTAG)	811,539 European ancestry individuals	NA	1q22	Intergenic	(MTAG)
chr1	155825392	155825393	rs822493	Olafsson S	2019-10-30	Common and rare sequence variants influencing tumor biomarkers in blood.	Serum cancer antigen 15.3 levels	7,107 Icelandic ancestry individuals	NA	1q22	SYT11
chr1	155827545	155827546	rs7556519	Dumitrescu L	2019-09-01	Sex differences in the genetic predictors of Alzheimer's pathology.	Neuritic plaque	2,701 European ancestry men	NA	1q22	GON4L
chr1	155860090	155860091	rs1749405	Akiyama M	2017-09-11	Genome-wide association study identifies 112 new loci for body mass index in the Japanese population.	Body mass index	up to 72,390 Japanese ancestry women, up to 85,894 Japanese ancestry men	up to 10,048 Japanese ancestry women, up to 5,098 Japanese ancestry men, up to 181,999 European ancestry women, up to 140,155 European ancestry controls	1q22	SYT11, RIT1
chr1	155867257	155867259	rs66756214	Vuckovic D	2020-09-01	The Polygenic and Monogenic Basis of Blood Traits and Diseases.	Immature fraction of reticulocytes	408,112 British individuals	NA		RNU4-19P, RIT1
chr1	155868624	155868625	rs2282301	Sonuga-Barke EJ	2008-10-07	Does parental expressed emotion moderate genetic effects in ADHD? An exploration using a genome wide association scan.	Conduct disorder (maternal expressed emotions interaction)	909 European ancestry trios	NA	1q22	RIT1	(maternal warmth)
chr1	155876612	155876613	rs3856261	Kichaev G	2018-12-27	Leveraging Polygenic Functional Enrichment to Improve GWAS Power.	Eczema	approximately 459,000 European ancestry individuals	NA	1q22
chr1	155876612	155876613	rs3856261	Goes FS	2015-07-21	Genome-wide association study of schizophrenia in Ashkenazi Jews.	Schizophrenia	592 Ashkenazi Jewish ancestry cases, 505 Ashkenazi Jewish ancestry controls, 36,989 cases, 113,075 controls	NA	1q22	NR
chr1	155878731	155878732	rs670523	Warrington NM	2019-05-01	Maternal and fetal genetic effects on birth weight and their relevance to cardio-metabolic risk factors.	Birth weight	298,142 European ancestry individuals, 6,635 African American individuals, 1,449 Filipino individuals, 420 Turkish individuals, 365 Moroccan individuals, 395 Surinamese individuals, 1,052 Afro-Caribbean individuals, 612 Hispanic individuals, 1,180 Thai individuals, 840 Chinese ancestry individuals, 10,133 individuals	NR	1q22	RIT1, LMNA
chr1	155878731	155878732	rs670523	Liu JZ	2015-07-20	Association analyses identify 38 susceptibility loci for inflammatory bowel disease and highlight shared genetic risk across populations.	Crohn's disease	5,956 European ancestry cases, 14,927 European ancestry controls	14,594 European ancestry cases, 26,715 European ancestry controls, 151 Iranian ancestry cases, 342 Iranian ancestry controls, 184 Indian ancestry cases, 990 Indian ancestry controls, 1,690 East Asian ancestry cases, 3,719 East Asian ancestry controls	1q22	NR	(EA)
chr1	155878731	155878732	rs670523	Jostins L	2012-11-01	Host-microbe interactions have shaped the genetic architecture of inflammatory bowel disease.	Inflammatory bowel disease	12,924 European ancestry cases, 21,442 European ancestry controls	25,683 European ancestry cases, 17,015 European ancestry controls	1q22	RIT1, MSTO1, UBQLN4
chr1	155888762	155888762	rs768651403	Ruth KS	2020-02-10	Using human genetics to understand the disease impacts of testosterone in men and women.	Sex hormone-binding globulin levels adjusted for BMI	180,094 European ancestry men	NA	1q22	NR
chr1	155888762	155888762	rs768651403	Ruth KS	2020-02-10	Using human genetics to understand the disease impacts of testosterone in men and women.	Sex hormone-binding globulin levels	180,726 European ancestry men	NA	1q22	NR
chr1	155898759	155898759	rs11406084	Michailidou K	2017-10-23	Association analysis identifies 65 new breast cancer risk loci.	Breast cancer	76,192 European ancestry cases, 63,082 European ancestry controls	46,785 European ancestry cases, 42,892 European ancestry controls, 14,068 East Asian ancestry cases, 13,104 East Asian ancestry controls	1q22	NR	(EA)
chr1	155907822	155907823	rs11264422	Wojcik GL	2019-06-19	Genetic analyses of diverse populations improves discovery for complex traits.	White blood cell count	8,825 African American individuals, 18,251 Hispanic/Latino individuals, 543 Asian ancestry individuals, 606 Native American ancestry individuals, 383 individuals	NA	1q22	NR
chr1	155908656	155908657	rs140953793	Hernandez Cordero AI	2019-11-21	Genome-wide Associations Reveal Human-Mouse Genetic Convergence and Modifiers of Myogenesis, CPNE1 and STC2.	Appendicular lean mass	181,862 European ancestry elderly individuals	NA	1q22	NR
chr1	155908656	155908657	rs140953793	Zhu Z	2019-10-24	Shared Genetic and Experimental Links between Obesity-Related Traits and Asthma Subtypes in UK Biobank.	Waist-to-hip ratio adjusted for BMI	457,690 European ancestry individuals	NA	1q22	NR
chr1	155908656	155908657	rs140953793	Zhu Z	2019-10-24	Shared Genetic and Experimental Links between Obesity-Related Traits and Asthma Subtypes in UK Biobank.	Waist circumference adjusted for body mass index	457,690 European ancestry individuals	NA	1q22	NR
chr1	155927751	155927752	rs2364403	Ahmeti KB	2012-09-05	Age of onset of amyotrophic lateral sclerosis is modulated by a locus on 1p34.1.	Amyotrophic lateral sclerosis (age of onset)	4,243 European ancestry cases	NA	1q22	ARHGEF2	(Meta)
chr1	155946398	155946399	rs7534858	Dumitrescu L	2019-09-01	Sex differences in the genetic predictors of Alzheimer's pathology.	Neuritic plaque	2,701 European ancestry men	NA	1q22	ARHGEF2
chr1	155950962	155950963	rs35588936	Richardson TG	2020-05-06	Use of genetic variation to separate the effects of early and later life adiposity on disease risk: mendelian randomisation study.	Body size at age 10	453,169 European ancestry individuals	NA	1q22	ARHGEF2
chr1	155962067	155962067	rs35770803	Meyer HV	2020-08-19	Genetic and functional insights into the fractal structure of the heart.	Myocardial fractal dimension (slice 9)	18,096 European individuals		1q22	NR
chr1	155962067	155962067	rs35770803	Meyer HV	2020-08-19	Genetic and functional insights into the fractal structure of the heart.	Myocardial fractal dimension (slice 8)	18,096 European individuals		1q22	NR
chr1	155962067	155962067	rs35770803	Meyer HV	2020-08-19	Genetic and functional insights into the fractal structure of the heart.	Myocardial fractal dimension (slice 7)	18,096 European individuals		1q22	NR
chr1	155962067	155962067	rs35770803	Meyer HV	2020-08-19	Genetic and functional insights into the fractal structure of the heart.	Myocardial fractal dimension (slice 6)	18,096 European individuals		1q22	NR
chr1	155969427	155969428	rs4330912	Horikoshi M	2016-10-13	Genome-wide associations for birth weight and correlations with adult disease.	Birth weight	133,903 European ancestry individuals	9,799 European ancestry individuals	1q22	ZBTB7B	(Conditioned on rs3753639)
chr1	155985898	155985899	rs72708239	Ruth KS	2020-02-10	Using human genetics to understand the disease impacts of testosterone in men and women.	Total testosterone levels	425,097 European ancestry individuals	NA	1q22	NR
chr1	155997172	155997173	rs2364400	Karlsson Linner R	2019-01-14	Genome-wide association analyses of risk tolerance and risky behaviors in over 1 million individuals identify hundreds of loci and shared genetic influences.	General risk tolerance (MTAG)	975,353 European ancestry individuals	NA	1q22	UBQLN4
chr1	155999570	155999571	rs4661096	Chen MH	2020-09-01	Trans-ethnic and Ancestry-Specific Blood-Cell Genetics in 746,667 Individuals from 5 Global Populations.	White blood cell count	9,368 Hispanic or Latin American individuals	NA	1q22	NR
chr1	156009126	156009127	rs76830943	Ruth KS	2020-02-10	Using human genetics to understand the disease impacts of testosterone in men and women.	Total testosterone levels	230,454 European ancestry women	NA	1q22	NR
chr1	156011443	156011444	rs2297792	Turcot V	2017-12-22	Protein-altering variants associated with body mass index implicate pathways that control energy intake and expenditure in obesity.	Body mass index	up to 449,889 European ancestry individuals, up to 29,398 South Asian ancestry individuals, up to 27,610 African American individuals, up to 8,839 East Asian individuals, up to 10,772 Hispanic ancestry individuals	up to 196,766 European ancestry individuals	1q22	UBQLN4
chr1	156019074	156019075	rs61813293	Karlsson T	2019-09-09	Contribution of genetics to visceral adiposity and its relation to cardiovascular and metabolic disease.	Predicted visceral adipose tissue	325,153 British ancestry individuals	NA	1q22	NR
chr1	156030036	156030037	rs34372695	Smeland OB	2020-02-08	Genome-wide Association Analysis of Parkinson's Disease and Schizophrenia Reveals Shared Genetic Architecture and Identifies Novel Risk Loci.	Parkinson's disease	20,184 European ancestry cases, 397,324 European ancestry controls	NA	1q22	RAB25
chr1	156030036	156030037	rs34372695	Nalls MA	2011-02-01	Imputation of sequence variants for identification of genetic risks for Parkinson's disease: a meta-analysis of genome-wide association studies.	Parkinson's disease	5,333 European ancestry cases, 12,019 European ancestry controls	7,053 cases, 9,007 controls	1q22	SYT11
chr1	156038057	156038058	rs61748951	Richardson TG	2020-03-23	Evaluating the relationship between circulating lipoprotein lipids and apolipoproteins with risk of coronary heart disease: A multivariable Mendelian randomisation analysis.	HDL cholesterol levels	403,943 European ancestry individuals	NA	1q22	RAB25
chr1	156038057	156038058	rs61748951	Richardson TG	2020-03-23	Evaluating the relationship between circulating lipoprotein lipids and apolipoproteins with risk of coronary heart disease: A multivariable Mendelian randomisation analysis.	Apolipoprotein A1 levels	393,193 European ancestry individuals	NA	1q22	RAB25
chr1	156038057	156038058	rs61748951	Lee JJ	2018-07-23	Gene discovery and polygenic prediction from a genome-wide association study of educational attainment in 1.1 million individuals.	Educational attainment (years of education)	up to 1,131,881 European ancestry individuals	NA	1q22
chr1	156038057	156038058	rs61748951	Lee JJ	2018-07-23	Gene discovery and polygenic prediction from a genome-wide association study of educational attainment in 1.1 million individuals.	Educational attainment (MTAG)	1,311,438 European ancestry individuals	NA	1q22	Intergenic	(MTAG)
chr1	156049876	156049877	rs61813324	Richardson TG	2020-05-06	Use of genetic variation to separate the effects of early and later life adiposity on disease risk: mendelian randomisation study.	Adult body size	453,169 European ancestry individuals		1q22	MEX3A
chr1	156049876	156049877	rs61813324	Zhu Z	2019-10-24	Shared Genetic and Experimental Links between Obesity-Related Traits and Asthma Subtypes in UK Biobank.	Body mass index	457,822 European ancestry individuals	NA	1q22	NR
chr1	156049876	156049877	rs61813324	Kichaev G	2018-12-27	Leveraging Polygenic Functional Enrichment to Improve GWAS Power.	Body mass index	approximately 458,000 European ancestry individuals	NA	1q22
chr1	156049876	156049877	rs61813324	Pulit SL	2018-09-14	Meta-analysis of genome-wide association studies for body fat distribution in 694,649 individuals of European ancestry.	Body mass index	806,834 European ancestry individuals	NA	1q22	NA
chr1	156049876	156049877	rs61813324	Pulit SL	2018-09-14	Meta-analysis of genome-wide association studies for body fat distribution in 694,649 individuals of European ancestry.	Body mass index	434,794 European ancestry female individuals	NA	1q22	NA
chr1	156049876	156049877	rs61813324	Pulit SL	2018-09-14	Meta-analysis of genome-wide association studies for body fat distribution in 694,649 individuals of European ancestry.	Body mass index	374,756 European ancestry male individuals	NA	1q22	NA
chr1	156057416	156057417	rs112941217	Lopez-Mejias R	2018-09-24	A genome-wide association study identifies a 3'UTR genetic variant of RARB associated with carotid intima-media thickness in rheumatoid arthritis.	Ischemic heart disease in rheumatoid arthritis	224 Spanish ancestry patients, 2,765 Spanish ancestry controls	NA	1q22	LMNA
chr1	156061221	156061222	rs7542186	Tin A	2019-10-02	Target genes, variants, tissues and transcriptional pathways influencing human serum urate levels.	Urate levels	288,649 European ancestry individuals, 125,725 East Asian ancestry individuals, 33,671 African American individuals, 9,037 South Asian ancestry individuals, 608 Hispanic individuals	NA	1q22	LMNA	(East Asian)
chr1	156078375	156078376	rs116480793	Pei YF	2020-10-23	The genetic architecture of appendicular lean mass characterized by association analysis in the UK Biobank study.	Appendicular lean mass	450,243 European ancestry individuals	NA	1q22	NR
chr1	156078375	156078376	rs116480793	Hernandez Cordero AI	2019-11-21	Genome-wide Associations Reveal Human-Mouse Genetic Convergence and Modifiers of Myogenesis, CPNE1 and STC2.	Appendicular lean mass	85,750 European ancestry middle-aged adult individuals	NA	1q22	NR
chr1	156078375	156078376	rs116480793	Hernandez Cordero AI	2019-11-21	Genome-wide Associations Reveal Human-Mouse Genetic Convergence and Modifiers of Myogenesis, CPNE1 and STC2.	Appendicular lean mass	181,862 European ancestry elderly individuals	NA	1q22	NR
chr1	156078375	156078376	rs116480793	McKay JD	2017-06-12	Large-scale association analysis identifies new lung cancer susceptibility loci and heterogeneity in genetic susceptibility across histological subtypes.	Lung cancer in ever smokers	23,223 European ancestry cases, 16,964 European ancestry controls	NA	1q22	LMNA
chr1	156080443	156080444	rs58799304	Traylor M	2016-12-20	Genetic variation at 16q24.2 is associated with small vessel stroke.	Ischemic stroke	10,210 European ancestry cases, 12,285 European ancestry controls	7,743 European ancestry cases, 17,970 European ancestry controls	1q22	NR
chr1	156083467	156083468	rs2485662	Rhee EP	2013-07-02	A genome-wide association study of the human metabolome in a community-based cohort.	Metabolite levels	2,076 European ancestry individuals	NA	1q22	MEX3A	(TAG 50:2)
chr1	156083467	156083468	rs2485662	Rhee EP	2013-07-02	A genome-wide association study of the human metabolome in a community-based cohort.	Metabolite levels	2,076 European ancestry individuals	NA	1q22	MEX3A	(TAG 48:1)
chr1	156084486	156084487	rs188625872	Yodsurang V	2018-12-17	Genome-wide association study (GWAS) of ovarian cancer in Japanese predicted regulatory variants in 22q13.1.	Ovarian cancer	681 Japanese ancestry cases, 17,492 Japanese ancestry controls	NA	1q22	LMNA
chr1	156087205	156087206	rs675661	Vuckovic D	2020-09-01	The Polygenic and Monogenic Basis of Blood Traits and Diseases.	Neutrophil count	408,112 British individuals	NA	1q22	LMNA
chr1	156088525	156088526	rs584025	Kichaev G	2018-12-27	Leveraging Polygenic Functional Enrichment to Improve GWAS Power.	White blood cell count	approximately 444,000 European ancestry individuals	NA	1q22
chr1	156089872	156089873	rs501791	Chen MH	2020-09-01	Trans-ethnic and Ancestry-Specific Blood-Cell Genetics in 746,667 Individuals from 5 Global Populations.	White blood cell count	562,243 European ancestry individuals	NA	1q22	NR
chr1	156089872	156089873	rs501791	Chen MH	2020-09-01	Trans-ethnic and Ancestry-Specific Blood-Cell Genetics in 746,667 Individuals from 5 Global Populations.	Neutrophil count	519,288 European ancestry individuals	NA	1q22	NR
chr1	156106184	156106185	rs505058	Kichaev G	2018-12-27	Leveraging Polygenic Functional Enrichment to Improve GWAS Power.	Height	approximately 458,000 European ancestry individuals	NA	1q22
chr1	156110165	156110166	rs568036	Vuckovic D	2020-09-01	The Polygenic and Monogenic Basis of Blood Traits and Diseases.	White blood cell count	408,112 British individuals	NA	1q22	LMNA
chr1	156111286	156111287	rs536857	Zhu Z	2019-10-24	Shared Genetic and Experimental Links between Obesity-Related Traits and Asthma Subtypes in UK Biobank.	Body mass index	457,822 European ancestry individuals	NA	1q22	NR
chr1	156112469	156112470	rs78261031	Vuckovic D	2020-09-01	The Polygenic and Monogenic Basis of Blood Traits and Diseases.	Platelet count	408,112 British individuals	NA	1q22	SEMA4A
chr1	156129795	156129796	rs76719272	Evangelou E	2018-09-17	Genetic analysis of over 1 million people identifies 535 new loci associated with blood pressure traits.	Systolic blood pressure	757,601 European ancestry individuals	249,262 European ancestry individuals	1q22	SEMA4A
chr1	156153042	156153043	rs11264454	Zhang H	2020-05-18	Genome-wide association study identifies 32 novel breast cancer susceptibility loci from overall and subtype-specific analyses.	Breast cancer	133,384 European ancestry cases, 113,789 European ancestry controls	NA	1q22	NR
chr1	156153042	156153043	rs11264454	Michailidou K	2017-10-23	Association analysis identifies 65 new breast cancer risk loci.	Breast cancer	76,192 European ancestry cases, 63,082 European ancestry controls	46,785 European ancestry cases, 42,892 European ancestry controls, 14,068 East Asian ancestry cases, 13,104 East Asian ancestry controls	1q22	NR	(EA)
chr1	156154859	156154860	rs35643925	Nalls MA	2019-12-01	Identification of novel risk loci, causal insights, and heritable risk for Parkinson's disease: a meta-analysis of genome-wide association studies.	Parkinson's disease or first degree relation to individual with Parkinson's disease	15,056 European ancestry cases, 18,618 European ancestry proxy cases, 449,056 European ancestry controls	22,632 European ancestry cases, 968,735 European ancestry controls	1q22	SEMA4A
chr1	156163717	156163718	rs2241111	Gao B	2018-01-24	Genome-wide association study of paclitaxel and carboplatin disposition in women with epithelial ovarian cancer.	Paclitaxel disposition in epithelial ovarian cancer	66 European ancestry cases, 14 Asian ancestry cases	NA	1q22	SLC25A44
chr1	156169609	156169610	rs2072499	Wang Z	2017-06-12	Meta-analysis of five genome-wide association studies identifies multiple new loci associated with testicular germ cell tumor.	Testicular germ cell tumor	3,558 European ancestry cases, 13,970 European ancestry controls	NA	1q22	SLC25A44, KIAA0446
chr1	156169609	156169610	rs2072499	Litchfield K	2017-06-12	Identification of 19 new risk loci and potential regulatory mechanisms influencing susceptibility to testicular germ cell tumor.	Testicular germ cell tumor	5,518 European ancestry cases, 19,055 European ancestry controls	1,801 European ancestry cases, 4,027 European ancestry controls	1q22	CLCN6, SLC25A44
chr1	156169609	156169610	rs2072499	Kristiansen W	2015-04-15	Two new loci and gene sets related to sex determination and cancer progression are associated with susceptibility to testicular germ cell tumor.	Testicular germ cell tumor	1,326 European ancestry cases, 6,687 European ancestry controls	710 European ancestry case-parent triads, 289 European ancestry cases, 290 European ancestry controls	1q22	SLC20A44
chr1	156169609	156169610	rs2072499	Ruark E	2013-05-12	Identification of nine new susceptibility loci for testicular cancer, including variants near DAZL and PRDM14.	Testicular germ cell tumor	986 European ancestry cases, 4,946 European ancestry controls	1,064 European ancestry cases, 10,082 European ancestry controls	1q22	SLC25A44
chr1	156171485	156171486	rs76102184	Han X	2020-01-03	Using Mendelian randomization to evaluate the causal relationship between serum C-reactive protein levels and age-related macular degeneration.	C-reactive protein levels	418,642 British ancestry individuals	NA	1q22	NR
chr1	156171485	156171486	rs76102184	Zhu Z	2019-10-24	Shared Genetic and Experimental Links between Obesity-Related Traits and Asthma Subtypes in UK Biobank.	Body mass index	457,822 European ancestry individuals	NA	1q22	NR
chr1	156189285	156189286	rs2758596	Gao B	2018-01-24	Genome-wide association study of paclitaxel and carboplatin disposition in women with epithelial ovarian cancer.	Paclitaxel disposition in epithelial ovarian cancer	66 European ancestry cases, 14 Asian ancestry cases	NA	1q22	PMF1, PMF1-BGLAP
chr1	156195933	156195934	rs557685919	Hernandez Cordero AI	2019-11-21	Genome-wide Associations Reveal Human-Mouse Genetic Convergence and Modifiers of Myogenesis, CPNE1 and STC2.	Appendicular lean mass	181,862 European ancestry elderly individuals	NA	1q22	NR
chr1	156197379	156197380	rs2984613	Verhaaren BF	2015-07-02	Multiethnic genome-wide association study of cerebral white matter hyperintensities on MRI.	White matter hyperintensity burden	17,936 European ancestry individuals, 1,943 African American ancestry individuals, 795 Hispanic individuals, 204 Chinese ancestry individuals, 201 Malay ancestry individuals	NA	1q22	PMF1, BGLAP
chr1	156197379	156197380	rs2984613	Woo D	2014-03-18	Meta-analysis of genome-wide association studies identifies 1q22 as a susceptibility locus for intracerebral hemorrhage.	Intracerebral hemorrhage	664 European ancestry lobar cases, 881 European ancestry nonlobar cases, 1,481 European ancestry controls	513 European ancestry cases, 634 African American cases, 534 Hispanic cases, 1,552 European ancestry controls, 449 African American controls, 260 Hispanic controls	1q22	PMF1, SLC25A44	(nonlobar)
chr1	156198993	156198994	rs2758603	Deelen J	2019-08-14	A meta-analysis of genome-wide association studies identifies multiple longevity genes.	Longevity (age >99th survival percentile)	3,484 European ancestry cases, 2,178 East Asian ancestry cases, 25,483 European ancestry controls, 2,299 East Asian ancestry controls	NA	1q22	PMF1
chr1	156200444	156200445	rs2758605	Chung J	2019-08-20	Genome-wide association study of cerebral small vessel disease reveals established and novel loci.	Non-lobar intracerebral hemorrhage (MTAG)	at least 1,005 European ancestry cases, at least 1,711 European ancestry controls	NA	1q22	PMF1, PMF1-BGLAP
chr1	156200670	156200671	rs2842870	Morris AP	2019-01-03	Trans-ethnic kidney function association study reveals putative causal genes and effects on kidney-specific disease aetiologies.	Estimated glomerular filtration rate	134,070 European ancestry individuals, 143,658 East Asian ancestry individuals, 26,344 Hispanic or Latino ancestry individuals, 8,224 African American individuals	NA	1q22	PMF1, BGLAP
chr1	156202172	156202173	rs1052053	Malik R	2018-03-12	Multiancestry genome-wide association study of 520,000 subjects identifies 32 loci associated with stroke and stroke subtypes.	Stroke	40,585 European ancestry cases, 406,111 European ancestry controls, 17,369 East Asian ancestry cases, 28,195 East Asian ancestry controls, 2,437 South Asian ancestry cases, 6,707 South Asian ancestry controls, 5,541 African American cases, 15,154 African American controls, 365 Asian ancestry cases, 333 Asian ancestry controls, 865 Latin American cases, 692 Latin American controls	NA	1q22	SEMA4A, PMF1
chr1	156202172	156202173	rs1052053	Malik R	2018-03-12	Multiancestry genome-wide association study of 520,000 subjects identifies 32 loci associated with stroke and stroke subtypes.	Stroke	40,585 European ancestry cases, 406,111 European ancestry controls	NA	1q22	PMF1, SEMA4A
chr1	156202172	156202173	rs1052053	Malik R	2018-03-12	Multiancestry genome-wide association study of 520,000 subjects identifies 32 loci associated with stroke and stroke subtypes.	Ischemic stroke (small-vessel)	5,386 European ancestry cases, 192,662 European ancestry controls, 5,096 East Asian ancestry cases, 28,195 East Asian ancestry controls, 314 South Asian ancestry cases, 6,707 South Asian ancestry controls, 694 African American cases, 15,146 African American controls, 134 Asian ancestry cases, 333 Asian ancestry controls, 86 Latin American cases, 692 Latin American controls	NA	1q22	PMF1, SEMA4A
chr1	156202172	156202173	rs1052053	Malik R	2018-03-12	Multiancestry genome-wide association study of 520,000 subjects identifies 32 loci associated with stroke and stroke subtypes.	Ischemic stroke	34,217 European ancestry cases, 406,111 European ancestry controls, 17,369 East Asian ancestry cases, 28,195 East Asian ancestry controls, 2,437 South Asian ancestry cases, 6,707 South Asian ancestry controls, 5,541 African American cases, 15,146 African American controls, 222 Asian ancestry cases, 333 Asian ancestry controls, 555 Latin American cases, 692 Latin American controls	NA	1q22	PMF1, SEMA4A
chr1	156202172	156202173	rs1052053	Malik R	2018-03-12	Multiancestry genome-wide association study of 520,000 subjects identifies 32 loci associated with stroke and stroke subtypes.	Ischemic stroke	34,217 European ancestry cases, 406,111 European ancestry controls	NA	1q22	PMF1-BGLAP, PMF1
chr1	156202639	156202640	rs2736609	Wright DJ	2017-03-27	Genetic variants associated with mosaic Y chromosome loss highlight cell cycle genes and overlap with cancer susceptibility.	Mosaic loss of chromosome Y (Y chromosome dosage)	67,034 European ancestry men	8,715 European ancestry men, 9,793 men	1q22	PMF1
chr1	156204652	156204653	rs2842873	Terao C	2019-10-17	GWAS of mosaic loss of chromosome Y highlights genetic effects on blood cell differentiation.	Mosaic loss of chromosome Y (Y chromosome dosage)	95,380 Japanese men	NA	1q22	PMF1, PMF1-BGLAP
chr1	156204652	156204653	rs2842873	Terao C	2019-10-17	GWAS of mosaic loss of chromosome Y highlights genetic effects on blood cell differentiation.	Mosaic loss of chromosome Y (Y chromosome dosage)	205,011 men	NA	1q22	PMF1, BGLAP
chr1	156206120	156206121	rs1052067	Han X	2020-01-03	Using Mendelian randomization to evaluate the causal relationship between serum C-reactive protein levels and age-related macular degeneration.	C-reactive protein levels	418,642 British ancestry individuals	NA	1q22	NR
chr1	156215898	156215899	rs2075165	Tian C	2017-09-19	Genome-wide association and HLA region fine-mapping studies identify susceptibility loci for multiple common infections.	Tonsillectomy	60,098 European ancestry cases, 113,323 European ancestry controls	NA	1q22	NR
chr1	156218909	156218910	rs2241106	Kanai M	2018-02-05	Genetic analysis of quantitative traits in the Japanese population links cell types to complex human diseases.	Mean corpuscular hemoglobin concentration	108,728 Japanese ancestry individuals	NA	1q22	SMG5
chr1	156223055	156223056	rs75854315	Kichaev G	2018-12-27	Leveraging Polygenic Functional Enrichment to Improve GWAS Power.	Red cell distribution width	approximately 445,000 European ancestry individuals	NA	1q22
chr1	156233188	156233189	rs2273833	Chen MH	2020-09-01	Trans-ethnic and Ancestry-Specific Blood-Cell Genetics in 746,667 Individuals from 5 Global Populations.	Red blood cell count	150,708 East Asian ancestry individuals	NA	1q22	NR
chr1	156233188	156233189	rs2273833	Kanai M	2018-02-05	Genetic analysis of quantitative traits in the Japanese population links cell types to complex human diseases.	Hemoglobin A1c levels	42,790 Japanese ancestry individuals	NA	1q22	SMG5
chr1	156235220	156235221	rs12118238	Chen MH	2020-09-01	Trans-ethnic and Ancestry-Specific Blood-Cell Genetics in 746,667 Individuals from 5 Global Populations.	Hemoglobin concentration	149,861 East Asian ancestry individuals	NA	1q22	NR
# region=chr1:177264578-178264577												Header
chr1	177276005	177276006	rs16851048	Periyasamy S	2019-07-03	Association of Schizophrenia Risk With Disordered Niacin Metabolism in an Indian Genome-wide Association Study.	Schizophrenia	816 Indian ancestry cases, 900 Indian ancestry controls, 505 Indian ancestry cases and 871 Indian ancestry controls from 405 families, up to 36,989 European and unknown ancestry cases, up to 113,075 European and unknown ancestry controls	NA	1q25.2	NR
chr1	177280120	177280121	rs6670165	Lam M	2019-11-18	Comparative genetic architectures of schizophrenia in East Asian and European populations.	Schizophrenia	22,778 East Asian ancestry cases, 35,362 East Asian ancestry controls, 33,640 European ancestry cases, 43,456 European ancestry controls	NA	1q25.2	NR
chr1	177280120	177280121	rs6670165	Ikeda M	2018-10-03	Genome-Wide Association Study Detected Novel Susceptibility Genes for Schizophrenia and Shared Trans-Populations/Diseases Genetic Effect.	Schizophrenia	14,023 East Asian ancestry cases, 33,640 European ancestry cases, 31,505 East Asian ancestry controls, 43,456 European ancestry controls	NA	1q25.2	FAM5B	(EA)
chr1	177280120	177280121	rs6670165	Ikeda M	2018-10-03	Genome-Wide Association Study Detected Novel Susceptibility Genes for Schizophrenia and Shared Trans-Populations/Diseases Genetic Effect.	Schizophrenia	14,023 East Asian ancestry cases, 33,640 European ancestry cases, 31,505 East Asian ancestry controls, 43,456 European ancestry controls	NA	1q25.2	FAM5B
chr1	177280120	177280121	rs6670165	Li Z	2017-10-09	Genome-wide association analysis identifies 30 new susceptibility loci for schizophrenia.	Schizophrenia	7,699 Chinese ancestry cases, 35,476 European ancestry cases, 18,327 Chinese ancestry controls, 46,839 European ancestry controls	4,384 Chinese ancestry cases, 5,770 Chinese ancestry controls	1q25.2	FAM5B
chr1	177280120	177280121	rs6670165	Goes FS	2015-07-21	Genome-wide association study of schizophrenia in Ashkenazi Jews.	Schizophrenia	592 Ashkenazi Jewish ancestry cases, 505 Ashkenazi Jewish ancestry controls, 36,989 cases, 113,075 controls	NA	1q25.2	NR
chr1	177280120	177280121	rs6670165	Ripke S	2014-07-22	Biological insights from 108 schizophrenia-associated genetic loci.	Schizophrenia	32,405 European ancestry cases, 42,221 European ancestry controls, 1,235 European ancestry cases and 1,235 European ancestry controls from 1235 parent-offspring trios, 1,836 East Asian ancestry cases, 3,383 East Asian ancestry controls	1,513 European ancestry cases, 66,236 European ancestry controls	1q25.2	FAM5B
chr1	177306386	177306387	rs17659437	Anney RJL	2017-05-22	Meta-analysis of GWAS of over 16,000 individuals with autism spectrum disorder highlights a novel locus at 10q24.32 and a significant overlap with schizophrenia.	Autism spectrum disorder or schizophrenia	schizophrenia cases and controls (see Ripke, 2014), up to 6,197 European ancestry ASD cases, up to 7,377 European ancestry controls, up to 1,190 ASD cases, up to 1,190 controls	NA	1q25.2	BRINP2, LOC102724661
chr1	177309489	177309490	rs4650963	Pardinas AF	2018-02-26	Common schizophrenia alleles are enriched in mutation-intolerant genes and in regions under strong background selection.	Schizophrenia	40,675 European ancestry cases, 64,643 European ancestry controls	1,651 European ancestry cases, 4,111 cases, 142,717 European ancestry controls, 11,507 controls	1q25.2	BRINP2
chr1	177334781	177334782	rs4233170	Zhong VW	2019-05-02	A genome-wide association study of bitter and sweet beverage consumption.	Coffee consumption	335,909 European ancestry individuals	39,924 European ancestry individuals	1q25.2	LOC102724661
chr1	177363012	177363013	rs736840	Hyde CL	2016-08-01	Identification of 15 genetic loci associated with risk of major depression in individuals of European descent.	Major depressive disorder	84,847 European ancestry cases, 241,266 European ancestry controls	45,773 European ancestry cases, 106,354 European ancestry controls	1q25.2	FAM5B, SEC16B
chr1	177370032	177370033	rs16851203	Coleman JRI	2019-11-01	The Genetics of the Mood Disorder Spectrum: Genome-wide Association Analyses of More Than 185,000 Cases and 439,000 Controls.	Bipolar disorder or major depressive disorder	164,933 European ancestry major depressive disorder cases, 20,352 European ancestry bipolar disorder cases, 439,741 European ancestry controls	NA	1q25.2	NR
chr1	177374762	177374763	rs142462188	Cross-Disorder Group of the Psychiatric Genomics Consortium	2019-12-01	Genomic Relationships, Novel Loci, and Pleiotropic Mechanisms across Eight Psychiatric Disorders.	Anorexia nervosa, attention-deficit/hyperactivity disorder, autism spectrum disorder, bipolar disorder, major depression, obsessive-compulsive disorder, schizophrenia, or Tourette syndrome (pleiotropy)	19,009 European ancestry ADHD cases, 3,495 European ancestry anorexia cases, 18,381 European ancestry autism cases, 20,352 European ancestry bipolar disorder cases, 130,664 European ancestry major depression cases, 2,688 European ancestry OCD cases, 33,640 European ancestry schizophrenia cases, 4,645 European ancestry Tourette's cases, 494,162 European ancestry controls	NA	1q25.2	Intergenic
chr1	177387828	177387829	rs9943212	He B	2020-08-10	Genome-wide pQTL analysis of protein expression regulatory networks in the human liver.	Protein quantitative trait loci (liver)	172 European ancestry individuals, 29 Black individuals, 86 individuals	NA	1q25.2	NR	(CES1)
chr1	177404509	177404510	rs146949893	Nagy R	2017-03-07	Exploration of haplotype research consortium imputation for genome-wide association studies in 20,032 Generation Scotland participants.	Height	19,965 British ancestry individuals from 6863 families.	NA	1q25.2	RP1-35C21.2
chr1	177411321	177411322	rs80065677	Lee JJ	2018-07-23	Gene discovery and polygenic prediction from a genome-wide association study of educational attainment in 1.1 million individuals.	Highest math class taken (MTAG)	811,539 European ancestry individuals	NA	1q25.2	Intergenic	(MTAG)
chr1	177428017	177428018	rs72710803	Howard DM	2019-02-04	Genome-wide meta-analysis of depression identifies 102 independent variants and highlights the importance of the prefrontal brain regions.	Depression	118,811 European ancestry cases, 327,427 European ancestry controls, 127,552 cases, 233,763 controls	414,055 European ancestry cases, 892,299 European ancestry controls	1q25.2	NR
chr1	177439120	177439121	rs568799986	Howard DM	2018-04-16	Genome-wide association study of depression phenotypes in UK Biobank identifies variants in excitatory synaptic pathways.	Depression (broad)	113,769 British ancestry cases, 208,811 British ancestry controls	NA	1q25.2	NR
chr1	177568798	177568799	rs16851585	Holliday EG	2013-01-11	Insights into the genetic architecture of early stage age-related macular degeneration: a genome-wide association study meta-analysis.	Age-related macular degeneration	3,772 European ancestry cases, 16,033 European ancestry controls	264 Asian ancestry cases, 3,926 Asian ancestry controls	1q25.2	intergenic	(EA)
chr1	177572133	177572134	rs10753165	Liu J	2018-07-17	The coexistence of copy number variations (CNVs) and single nucleotide polymorphisms (SNPs) at a locus can result in distorted calculations of the significance in associating SNPs to disease.	Adolescent idiopathic scoliosis	196 cases, 303 controls	NA	1q25.2	NR
chr1	177573443	177573444	rs77525287	Chernus JM	2019-12-12	A candidate gene analysis and GWAS for genes associated with maternal nondisjunction of chromosome 21.	Maternal nondisjunction of chromosome 21 (MI error vs MII error)	535 mothers (meiosis I error), 157 mothers (meiosis II error)	NA	1q25.2	NR
chr1	177596480	177596481	rs12566910	Kichaev G	2018-12-27	Leveraging Polygenic Functional Enrichment to Improve GWAS Power.	Height	approximately 458,000 European ancestry individuals	NA	1q25.2
chr1	177602067	177602068	rs1252068	Balakrishnan P	2018-10-12	Genetic Variants Related to Cardiometabolic Traits Are Associated to B Cell Function, Insulin Resistance, and Diabetes Among AmeriCan Indians: The Strong Heart Family Study.	HOMA-B (corrected for HOMA-IR)	1,892 American Indian ancestry individuals	NA	1q25.2	LOC400796, SEC16B
chr1	177621200	177621201	rs1572511	Xie T	2014-01-17	Genome-wide association study combining pathway analysis for typical sporadic amyotrophic lateral sclerosis in Chinese Han populations.	Amyotrophic lateral sclerosis (sporadic)	250 Han Chinese ancestry cases, 250 Han Chinese ancestry controls	NA	1q25.2	SEC16B
chr1	177652461	177652462	rs1885646	Li X	2019-11-11	Genome-wide association study identifies SIAH3 locus influencing the rate of ventricular enlargement in non-demented elders.	Rate of ventricular enlargement	507 European ancestry individuals	NA	1q25.2	intergenic
chr1	177721830	177721831	rs12131792	Kim W	2019-07-19	DSP variants may be associated with longitudinal change in quantitative emphysema.	Emphysema annual change measurement in smokers (percent low attenuation area)	4,427 European ancestry individuals, 1,158 African American individuals	NA	1q25.2	SEC16B	(EA)
chr1	177722906	177722907	rs12140439	Aberg KA	2013-02-01	A comprehensive family-based replication study of schizophrenia genes.	Schizophrenia	11,185 European ancestry cases, 10,768 European ancestry controls	1,262 African American ancestry individuals, 2,740 European ancestry individuals, 2,296 Asian ancestry individuals	1q25.2	SEC16B	(EA)
chr1	177743302	177743303	rs143599985	Zhang Q	2018-10-22	Genotype effects contribute to variation in longitudinal methylome patterns in older people.	DNA methylation variation (age effect)	Up to 954 individuals	NA	1q25.2	NR
chr1	177751338	177751339	rs113466017	Spada J	2016-04-29	Genome-wide association analysis of actigraphic sleep phenotypes in the LIFE Adult Study.	Night sleep phenotypes	941 European ancestry individuals	NA	1q25.2	SEC16B	(resting duration)
chr1	177751809	177751810	rs978992	Zhu Z	2019-10-24	Shared Genetic and Experimental Links between Obesity-Related Traits and Asthma Subtypes in UK Biobank.	Body mass index	457,822 European ancestry individuals	NA	1q25.2	NR
chr1	177756503	177756504	rs1923626	Ahmeti KB	2012-09-05	Age of onset of amyotrophic lateral sclerosis is modulated by a locus on 1p34.1.	Amyotrophic lateral sclerosis (C9orf72 mutation interaction)	4,243 European ancestry cases	NA	1q25.2	SEC16B
chr1	177759148	177759149	rs9970167	Lee JJ	2018-07-23	Gene discovery and polygenic prediction from a genome-wide association study of educational attainment in 1.1 million individuals.	Cognitive performance (MTAG)	402,382 European ancestry individuals	NA	1q25.2	Intergenic	(MTAG)
chr1	177759644	177759645	rs10913420	Lee JJ	2018-07-23	Gene discovery and polygenic prediction from a genome-wide association study of educational attainment in 1.1 million individuals.	Self-reported math ability (MTAG)	670,471 European ancestry individuals	NA	1q25.2	Intergenic	(MTAG)
chr1	177759644	177759645	rs10913420	Lee JJ	2018-07-23	Gene discovery and polygenic prediction from a genome-wide association study of educational attainment in 1.1 million individuals.	Self-reported math ability	564,698 European ancestry individuals	NA	1q25.2	Intergenic
chr1	177759644	177759645	rs10913420	Lee JJ	2018-07-23	Gene discovery and polygenic prediction from a genome-wide association study of educational attainment in 1.1 million individuals.	Highest math class taken (MTAG)	811,539 European ancestry individuals	NA	1q25.2	Intergenic	(MTAG)
chr1	177759644	177759645	rs10913420	Lee JJ	2018-07-23	Gene discovery and polygenic prediction from a genome-wide association study of educational attainment in 1.1 million individuals.	Educational attainment (MTAG)	1,311,438 European ancestry individuals	NA	1q25.2	Intergenic	(MTAG)
chr1	177760917	177760918	rs9970077	Ikeda M	2018-10-03	Genome-Wide Association Study Detected Novel Susceptibility Genes for Schizophrenia and Shared Trans-Populations/Diseases Genetic Effect.	Schizophrenia	14,023 East Asian ancestry cases, 33,640 European ancestry cases, 31,505 East Asian ancestry controls, 43,456 European ancestry controls	NA	1q25.2	SEC16B
chr1	177760917	177760918	rs9970077	Ikeda M	2018-10-03	Genome-Wide Association Study Detected Novel Susceptibility Genes for Schizophrenia and Shared Trans-Populations/Diseases Genetic Effect.	Schizophrenia	14,023 East Asian ancestry cases, 33,640 European ancestry cases, 31,505 East Asian ancestry controls, 43,456 European ancestry controls	NA	1q25.2	SEC16B	(EA)
chr1	177760917	177760918	rs9970077	Li Z	2017-10-09	Genome-wide association analysis identifies 30 new susceptibility loci for schizophrenia.	Schizophrenia	7,699 Chinese ancestry cases, 35,476 European ancestry cases, 18,327 Chinese ancestry controls, 46,839 European ancestry controls	4,384 Chinese ancestry cases, 5,770 Chinese ancestry controls	1q25.2	intergenic
chr1	177761108	177761109	rs12748436	Richardson TG	2020-05-06	Use of genetic variation to separate the effects of early and later life adiposity on disease risk: mendelian randomisation study.	Body size at age 10	453,169 European ancestry individuals	NA	1q25.2	SEC16B
chr1	177766020	177766021	rs75608493	Bigdeli TB	2019-10-07	Contributions of common genetic variants to risk of schizophrenia among individuals of African and Latino ancestry.	Schizophrenia or schizoaffective disorder	6,152 African ancestry cases, 1,234 Latino cases, 34,241 European and East Asian ancestry cases, 3,918 African ancestry controls, 3,090 Latino controls, 45,604 European and East Asian ancestry controls, 1,235 European ancestry trios	NA	1q25.2	NR
chr1	177766020	177766021	rs75608493	Goes FS	2015-07-21	Genome-wide association study of schizophrenia in Ashkenazi Jews.	Schizophrenia	592 Ashkenazi Jewish ancestry cases, 505 Ashkenazi Jewish ancestry controls, 36,989 cases, 113,075 controls	NA	1q25.2	NR
chr1	177777482	177777483	rs56278732	Tachmazidou I	2017-06-01	Whole-Genome Sequencing Coupled to Imputation Discovers Genetic Signals for Anthropometric Traits.	Body fat mass	3,399 whole genome sequenced individuals, 11,802 European ancestry individuals	10,670 European ancestry individuals	1q25.2	RP11-63B19.1
chr1	177778146	177778147	rs113741607	Tian C	2017-09-19	Genome-wide association and HLA region fine-mapping studies identify susceptibility loci for multiple common infections.	Urinary tract infection frequency	35,000 European ancestry cases, 33,478 European ancestry controls	NA	1q25.2	NR
chr1	177783643	177783644	rs4652270	Zhu Z	2019-10-24	Shared Genetic and Experimental Links between Obesity-Related Traits and Asthma Subtypes in UK Biobank.	Body mass index	457,822 European ancestry individuals	NA	1q25.2	NR
chr1	177809132	177809133	rs12735657	Riveros-McKay F	2019-01-24	Genetic architecture of human thinness compared to severe obesity.	Obesity (extreme)	1,456 British ancestry obese children, 6,460 European ancestry control adults	up to 7,526 British ancestry obese individuals, at least 4,405 obese individuals, up to 20,720 British ancestry controls, 61,166 controls	1q25.2	SEC16B
chr1	177830320	177830321	rs144847043	Zhu Z	2019-10-24	Shared Genetic and Experimental Links between Obesity-Related Traits and Asthma Subtypes in UK Biobank.	Body mass index	457,822 European ancestry individuals	NA	1q25.2	NR
chr1	177839611	177839612	rs10489881	Zhu Z	2019-10-24	Shared Genetic and Experimental Links between Obesity-Related Traits and Asthma Subtypes in UK Biobank.	Body mass index	457,822 European ancestry individuals	NA	1q25.2	NR
chr1	177841684	177841685	rs6670873	Hollis B	2020-03-24	Genomic analysis of male puberty timing highlights shared genetic basis with hair colour and lifespan.	Male puberty timing (late vs. average onset voice breaking)	11,334 European ancestry late onset individuals, 172,138 European ancestry average onset individuals	NA	1q25.2
chr1	177841684	177841685	rs6670873	Hollis B	2020-03-24	Genomic analysis of male puberty timing highlights shared genetic basis with hair colour and lifespan.	Male puberty timing (late vs. average onset facial hair)	26,066 European ancestry late onset individuals, 161,175 European ancestry average onset individuals	NA	1q25.2
chr1	177841684	177841685	rs6670873	Hollis B	2020-03-24	Genomic analysis of male puberty timing highlights shared genetic basis with hair colour and lifespan.	Male puberty timing (age at voice breaking MTAG)	205,354 European ancestry individuals	NA	1q25.2
chr1	177852579	177852580	rs633715	Wojcik GL	2019-06-19	Genetic analyses of diverse populations improves discovery for complex traits.	Body mass index	17,127 African American individuals, 21,955 Hispanic/Latino individuals, 4,647 Asian ancestry individuals, 3,936 Native Hawaiian ancestry individuals, 645 Native American ancestry individuals, 1,025 individuals	NA	1q25.2	NR
chr1	177852579	177852580	rs633715	Akiyama M	2017-09-11	Genome-wide association study identifies 112 new loci for body mass index in the Japanese population.	Body mass index	up to 72,390 Japanese ancestry women, up to 85,894 Japanese ancestry men	up to 10,048 Japanese ancestry women, up to 5,098 Japanese ancestry men, up to 181,999 European ancestry women, up to 140,155 European ancestry controls	1q25.2	LOC101928778, SEC16B	(Japanese)
chr1	177852579	177852580	rs633715	Graff M	2017-04-27	Genome-wide physical activity interactions in adiposity - A meta-analysis of 200,452 adults.	Body mass index in physically inactive individuals	561 African American women, 352 Filipino ancestry women, 725 Indian ancestry women, 19,366 European ancestry women, 251 African American men, 4,654 Indian ancestry men, 11,727 European ancestry men, 959 European ancestry individuals	1,437 African American women, 5,184 European ancestry women, 64 African American men, 5,416 European ancestry men	1q25.2	SEC16B	(EA, women)
chr1	177852579	177852580	rs633715	Graff M	2017-04-27	Genome-wide physical activity interactions in adiposity - A meta-analysis of 200,452 adults.	Body mass index in physically active individuals	1,957 African American women, 1,773 Filipino ancestry women, 305 Indian ancestry women, 67,609 European ancestry women, 1,206 African American men, 2,029 Indian ancestry men, 43,399 European ancestry men, at least 4,819 European ancestry individuals	4,807 African American women, 12,347 European ancestry women, 265 African American men, 14,540 European ancestry men	1q25.2	SEC16B	(EA)
chr1	177852579	177852580	rs633715	Graff M	2017-04-27	Genome-wide physical activity interactions in adiposity - A meta-analysis of 200,452 adults.	Body mass index (joint analysis main effects and physical activity interaction)	2,518 African American women, 86,278 European ancestry women, 1,773 Filipino ancestry women, 1,030 Indian ancestry women, 1,457 African American men, 55,137 European ancestry men, 7,648 Indian ancestry men, 5,527 European ancestry individuals	6,244 African American women, 17,531 European ancestry women, 329 African American men, 19,956 European ancestry men	1q25.2	SEC16B	(EA)
chr1	177852579	177852580	rs633715	Graff M	2017-04-27	Genome-wide physical activity interactions in adiposity - A meta-analysis of 200,452 adults.	Body mass index	2,518 African American women, 86,278 European ancestry women, 1,773 Filipino ancestry women, 1,030 Indian ancestry women, 1,457 African American men, 55,137 European ancestry men, 7,648 Indian ancestry men, 5,527 European ancestry individuals	6,244 African American women, 17,531 European ancestry women, 329 African American men, 19,956 European ancestry men	1q25.2	SEC16B	(EA, women)
chr1	177852579	177852580	rs633715	Shungin D	2015-02-12	New genetic loci link adipose and insulin biology to body fat distribution.	Waist circumference	up to 56,910 European ancestry men, up to 86,570 European ancestry women	up to 36,570 European ancestry men, 30,172 European ancestry women, 915 Filipino ancestry men, 735 Filipino ancestry women, 2,351 African American/Afro-Caribbean ancestry men, 6,258 African American/Afro-Caribbean ancestry women, 2,285 South Asian ancestry men, 506 South Asian ancestry women, 195 Seychellois ancestry men, 266 Seychellois ancestry women	1q25.2	SEC16B	(EA)
chr1	177852579	177852580	rs633715	Shungin D	2015-02-12	New genetic loci link adipose and insulin biology to body fat distribution.	Waist circumference	up to 56,910 European ancestry men, up to 86,570 European ancestry women	up to 36,570 European ancestry men, 30,172 European ancestry women, 915 Filipino ancestry men, 735 Filipino ancestry women, 2,351 African American/Afro-Caribbean ancestry men, 6,258 African American/Afro-Caribbean ancestry women, 2,285 South Asian ancestry men, 506 South Asian ancestry women, 195 Seychellois ancestry men, 266 Seychellois ancestry women	1q25.2	SEC16B	(EA, men)
chr1	177852579	177852580	rs633715	Shungin D	2015-02-12	New genetic loci link adipose and insulin biology to body fat distribution.	Waist circumference	up to 56,910 European ancestry men, up to 86,570 European ancestry women	up to 36,570 European ancestry men, 30,172 European ancestry women, 915 Filipino ancestry men, 735 Filipino ancestry women, 2,351 African American/Afro-Caribbean ancestry men, 6,258 African American/Afro-Caribbean ancestry women, 2,285 South Asian ancestry men, 506 South Asian ancestry women, 195 Seychellois ancestry men, 266 Seychellois ancestry women	1q25.2	SEC16B	(EA, women)
chr1	177852579	177852580	rs633715	Berndt SI	2013-04-07	Genome-wide meta-analysis identifies 11 new loci for anthropometric traits and provides insights into genetic architecture.	Obesity	93,015 European ancestry overweight individuals, 32,858 European ancestry class I obese individuals, 9,889 European ancestry class II obese individuals, 2,896 European ancestry class III obese individuals, up to 65,840 European ancestry controls	65,332 European ancestry overweight individuals, 22,373 European ancestry class I obese individuals, 5,476 European ancestry class II obese individuals, 1,162 European ancestry class III obese individuals, up to 39,294 European ancestry controls	1q25.2	SEC16B	(Overweight)
chr1	177852579	177852580	rs633715	Berndt SI	2013-04-07	Genome-wide meta-analysis identifies 11 new loci for anthropometric traits and provides insights into genetic architecture.	Obesity	93,015 European ancestry overweight individuals, 32,858 European ancestry class I obese individuals, 9,889 European ancestry class II obese individuals, 2,896 European ancestry class III obese individuals, up to 65,840 European ancestry controls	65,332 European ancestry overweight individuals, 22,373 European ancestry class I obese individuals, 5,476 European ancestry class II obese individuals, 1,162 European ancestry class III obese individuals, up to 39,294 European ancestry controls	1q25.2	SEC16B	(Obesity class I)
chr1	177852579	177852580	rs633715	Berndt SI	2013-04-07	Genome-wide meta-analysis identifies 11 new loci for anthropometric traits and provides insights into genetic architecture.	Obesity	93,015 European ancestry overweight individuals, 32,858 European ancestry class I obese individuals, 9,889 European ancestry class II obese individuals, 2,896 European ancestry class III obese individuals, up to 65,840 European ancestry controls	65,332 European ancestry overweight individuals, 22,373 European ancestry class I obese individuals, 5,476 European ancestry class II obese individuals, 1,162 European ancestry class III obese individuals, up to 39,294 European ancestry controls	1q25.2	SEC16B	(Obesity class II)
chr1	177852579	177852580	rs633715	Berndt SI	2013-04-07	Genome-wide meta-analysis identifies 11 new loci for anthropometric traits and provides insights into genetic architecture.	Body mass index	7,962 European ancestry high body mass index individuals, 8,106 European ancestry low body mass index individuals	4,900 European ancestry high body mass index individuals, 4,891 European ancestry low body mass index individuals	1q25.2	SEC16B
chr1	177852579	177852580	rs633715	Elks CE	2010-11-21	Thirty new loci for age at menarche identified by a meta-analysis of genome-wide association studies.	Menarche (age at onset)	86,142 European ancestry female individuals, 557 Old Order Amish (founder/genetic isolate) female individuals, 1,103 Erasmus Rucphen (founder/genetic isolate) female individuals	Up to 12,813 European ancestry female individuals, 910 Val Borbera (founder/genetic isolate) female individuals, 348 Orcadian (founder/genetic isolate) female individuals, 338 Friuli Venezia Giulia (founder/genetic isolate) female individuals, 322 Carlantino (founder/genetic/isolate) female individuals	1q25.2	SEC16B
chr1	177855516	177855517	rs516636	Wojcik GL	2019-06-19	Genetic analyses of diverse populations improves discovery for complex traits.	Body mass index	17,127 African American individuals, 21,955 Hispanic/Latino individuals, 4,647 Asian ancestry individuals, 3,936 Native Hawaiian ancestry individuals, 645 Native American ancestry individuals, 1,025 individuals	NA	1q25.2	NR
chr1	177855516	177855517	rs516636	Okada Y	2012-02-19	Common variants at CDKAL1 and KLF9 are associated with body mass index in east Asian populations.	Body mass index (SNP x SNP interaction)	26,620 Japanese ancestry individuals	35,625 East Asian ancestry individuals	1q25.2	SEC16B
chr1	177864553	177864554	rs10798580	Zhu Z	2019-10-24	Shared Genetic and Experimental Links between Obesity-Related Traits and Asthma Subtypes in UK Biobank.	Body mass index	457,822 European ancestry individuals	NA	1q25.2	NR
chr1	177864553	177864554	rs10798580	Kichaev G	2018-12-27	Leveraging Polygenic Functional Enrichment to Improve GWAS Power.	Height	approximately 458,000 European ancestry individuals	NA	1q25.2
chr1	177872904	177872905	rs571567	Pickrell JK	2016-05-16	Detection and interpretation of shared genetic influences on 42 human traits.	Menarche (age at onset)	76,831 European ancestry individuals	NA	1q25.2	FAM5B, SEC16B
chr1	177873209	177873210	rs574367	Wojcik GL	2019-06-19	Genetic analyses of diverse populations improves discovery for complex traits.	Body mass index	17,127 African American individuals, 21,955 Hispanic/Latino individuals, 4,647 Asian ancestry individuals, 3,936 Native Hawaiian ancestry individuals, 645 Native American ancestry individuals, 1,025 individuals	NA	1q25.2	NR
chr1	177873209	177873210	rs574367	Zhong VW	2019-05-02	A genome-wide association study of bitter and sweet beverage consumption.	Coffee consumption	335,909 European ancestry individuals	39,924 European ancestry individuals	1q25.2	SEC16B
chr1	177873209	177873210	rs574367	Wen W	2014-05-26	Meta-analysis of genome-wide association studies in East Asian-ancestry populations identifies four new loci for body mass index.	Body mass index	82,438 East Asian ancestry individuals, 4,301 South East Asian ancestry individuals	Up to 47,352 East Asian ancestry individuals	1q25.2	SEC16B
chr1	177875513	177875514	rs527248	Jeon S	2019-09-12	Structural equation modeling for hypertension and type 2 diabetes based on multiple SNPs and multiple phenotypes.	Body mass index	8,842 Korean ancestry individuals	NA	1q25.2	SEC16B
chr1	177875823	177875824	rs72702742	Zhu Z	2019-10-24	Shared Genetic and Experimental Links between Obesity-Related Traits and Asthma Subtypes in UK Biobank.	Body mass index	457,822 European ancestry individuals	NA	1q25.2	NR
chr1	177878932	177878933	rs532504	Spracklen CN	2020-05-06	Identification of type 2 diabetes loci in 433,540 East Asian individuals.	Type 2 diabetes	77,418 East Asian cases, 356,122 East Asian controls	NA	1q25.2	SEC16B
chr1	177878932	177878933	rs532504	Tachmazidou I	2017-06-01	Whole-Genome Sequencing Coupled to Imputation Discovers Genetic Signals for Anthropometric Traits.	Waist circumference	1,254 whole genome sequenced European ancestry individuals, 3,072 whole genome sequenced individuals, 41,450 European ancestry individuals, 397 Carlantino (founder/genetic isolate) individuals, 791 Friuli Venezia Giulia (founder/genetic isolate) individuals, 1,060 Mylopotamos (founder/genetic isolate) individuals, 887 Pomak (founder/genetic isolate) individuals, 1,754 Val Borbera (founder/genetic…	206,737 European ancestry individuals	1q25.2	SEC16B
chr1	177878932	177878933	rs532504	Tachmazidou I	2017-06-01	Whole-Genome Sequencing Coupled to Imputation Discovers Genetic Signals for Anthropometric Traits.	Waist circumference	1,254 whole genome sequenced European ancestry individuals, 3,072 whole genome sequenced individuals, 41,450 European ancestry individuals, 397 Carlantino (founder/genetic isolate) individuals, 791 Friuli Venezia Giulia (founder/genetic isolate) individuals, 1,060 Mylopotamos (founder/genetic isolate) individuals, 887 Pomak (founder/genetic isolate) individuals, 1,754 Val Borbera (founder/genetic…	206,737 European ancestry individuals	1q25.2	SEC16B
chr1	177878932	177878933	rs532504	Tachmazidou I	2017-06-01	Whole-Genome Sequencing Coupled to Imputation Discovers Genetic Signals for Anthropometric Traits.	Hip circumference	1,254 whole genome sequenced European ancestry individuals, 3,074 whole genome sequenced individuals, 29,716 European ancestry individuals, 400 Carlantino (founder/genetic isolate) individuals, 701 Friuli Venezia Giulia (founder/genetic isolate) individuals, 1,050 Mylopotamos (founder/genetic isolate) individuals, 883 Pomak (founder/genetic isolate) individuals	205,909 European ancestry individuals	1q25.2	SEC16B
chr1	177885761	177885762	rs630372	Tachmazidou I	2017-06-01	Whole-Genome Sequencing Coupled to Imputation Discovers Genetic Signals for Anthropometric Traits.	Weight	1,249 whole genome sequenced European ancestry individuals, 3,559 whole genome sequenced individuals, 46,819 European ancestry individuals, 472 Carlantino (founder/genetic isolate) individuals, 1,172 Friuli Venezia Giulia (founder/genetic isolate) individuals, 1,051 Mylopotamos (founder/genetic isolate) individuals, 942 Pomak (founder/genetic isolate) individuals, 1,779 Val Borbera (founder/genet…	179,022 European ancestry individuals	1q25.2	SEC16B
chr1	177889024	177889025	rs539515	Vujkovic M	2020-06-15	Discovery of 318 new risk loci for type 2 diabetes and related vascular outcomes among 1.4 million participants in a multi-ancestry meta-analysis.	Type 2 diabetes	148,726 European ancestry cases, 24,646 African American cases, 8,616 Hispanic cases, 46,511 Asian ancestry cases, 965,732 European ancestry controls, 31,446 African American controls, 11,829 Hispanic controls, 169,776 Asian ancestry controls	NA	1q25.2	NR
chr1	177889024	177889025	rs539515	Richardson TG	2020-05-06	Use of genetic variation to separate the effects of early and later life adiposity on disease risk: mendelian randomisation study.	Adult body size	453,169 European ancestry individuals		1q25.2	SEC16B
chr1	177889024	177889025	rs539515	Zhu Z	2019-10-24	Shared Genetic and Experimental Links between Obesity-Related Traits and Asthma Subtypes in UK Biobank.	Body mass index	457,822 European ancestry individuals	NA	1q25.2	NR
chr1	177889024	177889025	rs539515	Bradfield JP	2019-07-05	A Trans-ancestral Meta-Analysis of Genome-Wide Association Studies Reveals Loci Associated with Childhood Obesity.	Childhood obesity	8,613 European ancestry cases, 3,213 African American cases, 69 Moroccan ancestry cases, 986 Hispanic/Latino cases, 124 East Asian ancestry cases, 12,696 European ancestry controls, 1,392 African American controls, 64 Moroccan ancestry controls, 993 Hispanic/Latino controls, 454 East Asian ancestry controls	NA	1q25.2	NR	(EA)
chr1	177889024	177889025	rs539515	Karlsson T	2019-09-09	Contribution of genetics to visceral adiposity and its relation to cardiovascular and metabolic disease.	Predicted visceral adipose tissue	325,153 British ancestry individuals	NA	1q25.2	NR
chr1	177889024	177889025	rs539515	Kichaev G	2018-12-27	Leveraging Polygenic Functional Enrichment to Improve GWAS Power.	Body mass index	approximately 458,000 European ancestry individuals	NA	1q25.2
chr1	177889024	177889025	rs539515	Mahajan A	2018-10-08	Fine-mapping type 2 diabetes loci to single-variant resolution using high-density imputation and islet-specific epigenome maps.	Type 2 diabetes	74,124 European ancestry cases, 824,006 European ancestry controls	NA	1q25.2	SEC16B
chr1	177889024	177889025	rs539515	Tikkanen E	2018-04-24	Biological Insights Into Muscular Strength: Genetic Findings in the UK Biobank.	Hand grip strength	334,825 British ancestry individuals	NA	1q25.2	SEC16B
chr1	177889479	177889480	rs543874	Warner ET	2021-02-01	A Genome-Wide Association Study of Childhood Body Fatness.	Childhood body fatness	34,401 European ancestry individuals	NA	1q25.2	NR
chr1	177889479	177889480	rs543874	Vogelezang S	2020-10-12	Novel loci for childhood body mass index and shared heritability with adult cardiometabolic traits.	Childhood body mass index	39,620 European ancestry individuals	NA	1q25.2	SEC16B
chr1	177889479	177889480	rs543874	Richardson TG	2020-05-06	Use of genetic variation to separate the effects of early and later life adiposity on disease risk: mendelian randomisation study.	Body size at age 10	453,169 European ancestry individuals	NA	1q25.2	SEC16B
chr1	177889479	177889480	rs543874	Han X	2020-01-03	Using Mendelian randomization to evaluate the causal relationship between serum C-reactive protein levels and age-related macular degeneration.	C-reactive protein levels	418,642 British ancestry individuals	NA	1q25.2	NR
chr1	177889479	177889480	rs543874	Wojcik GL	2019-06-19	Genetic analyses of diverse populations improves discovery for complex traits.	Body mass index	17,127 African American individuals, 21,955 Hispanic/Latino individuals, 4,647 Asian ancestry individuals, 3,936 Native Hawaiian ancestry individuals, 645 Native American ancestry individuals, 1,025 individuals	NA	1q25.2	NR
chr1	177889479	177889480	rs543874	Hubel C	2018-12-28	Genomics of body fat percentage may contribute to sex bias in anorexia nervosa.	Fat-free mass	70,700 European ancestry female individuals, 85,261 European ancestry male individuals	NA	1q25.2	NR
chr1	177889479	177889480	rs543874	Hubel C	2018-12-28	Genomics of body fat percentage may contribute to sex bias in anorexia nervosa.	Fat-free mass	70,700 European ancestry female individuals, 85,261 European ancestry male individuals	NA	1q25.2	NR	(male)
chr1	177889479	177889480	rs543874	Hubel C	2018-12-28	Genomics of body fat percentage may contribute to sex bias in anorexia nervosa.	Fat-free mass	70,700 European ancestry female individuals, 85,261 European ancestry male individuals	NA	1q25.2	NR	(female)
chr1	177889479	177889480	rs543874	Hubel C	2018-12-28	Genomics of body fat percentage may contribute to sex bias in anorexia nervosa.	Body fat percentage	70,700 European ancestry female individuals, 85,261 European ancestry male individuals	NA	1q25.2	NR	(female)
chr1	177889479	177889480	rs543874	Hubel C	2018-12-28	Genomics of body fat percentage may contribute to sex bias in anorexia nervosa.	Body fat percentage	70,700 European ancestry female individuals, 85,261 European ancestry male individuals	NA	1q25.2	NR	(male)
chr1	177889479	177889480	rs543874	Hubel C	2018-12-28	Genomics of body fat percentage may contribute to sex bias in anorexia nervosa.	Body fat percentage	70,700 European ancestry female individuals, 85,261 European ancestry male individuals	NA	1q25.2	NR
chr1	177889479	177889480	rs543874	Pulit SL	2018-09-14	Meta-analysis of genome-wide association studies for body fat distribution in 694,649 individuals of European ancestry.	Waist-hip ratio	697,734 European ancestry individuals	NA	1q25.2	NA
chr1	177889479	177889480	rs543874	Pulit SL	2018-09-14	Meta-analysis of genome-wide association studies for body fat distribution in 694,649 individuals of European ancestry.	Waist-hip ratio	381,152 European female individuals	NA	1q25.2	NR
chr1	177889479	177889480	rs543874	Pulit SL	2018-09-14	Meta-analysis of genome-wide association studies for body fat distribution in 694,649 individuals of European ancestry.	Waist-hip ratio	316,772 European ancestry male individuals	NA	1q25.2	NR
chr1	177889479	177889480	rs543874	Pulit SL	2018-09-14	Meta-analysis of genome-wide association studies for body fat distribution in 694,649 individuals of European ancestry.	Body mass index	806,834 European ancestry individuals	NA	1q25.2	NA
chr1	177889479	177889480	rs543874	Pulit SL	2018-09-14	Meta-analysis of genome-wide association studies for body fat distribution in 694,649 individuals of European ancestry.	Body mass index	434,794 European ancestry female individuals	NA	1q25.2	NA
chr1	177889479	177889480	rs543874	Pulit SL	2018-09-14	Meta-analysis of genome-wide association studies for body fat distribution in 694,649 individuals of European ancestry.	Body mass index	374,756 European ancestry male individuals	NA	1q25.2	NA
chr1	177889479	177889480	rs543874	Hoffmann TJ	2018-08-14	A Large Multi-ethnic Genome-Wide Association Study of Adult Body Mass Index Identifies Novel Loci.	Body mass index	315,347 European ancestry individuals, 8,322 Hispanic/Latino individuals, 7,290 East Asian ancestry individuals, 3,069 African American individuals, 459 South Asian ancestry individuals	431,743 European ancestry individuals, 9,275 South Asian ancestry individuals, 8,261 African British individuals, 1,822 East Asian ancestry individuals, 7,620 individuals	1q25.2	NR
chr1	177889479	177889480	rs543874	Tikkanen E	2018-04-24	Biological Insights Into Muscular Strength: Genetic Findings in the UK Biobank.	Hand grip strength	223,215 British ancestry individuals	111,610 British ancestry individuals	1q25.2	ENSG00000254154
chr1	177889479	177889480	rs543874	Gong J	2017-12-21	Trans-ethnic analysis of metabochip data identifies two new loci associated with BMI.	Body mass index	35,606 African American individuals, 26,048 Hispanic/Latino individuals, 22,466 Asian or Native Hawaiian ancestry individuals, 17,859 European ancestry individuals, 535 Native American individuals	NA	1q25.2	SEC16B
chr1	177889479	177889480	rs543874	Akiyama M	2017-09-11	Genome-wide association study identifies 112 new loci for body mass index in the Japanese population.	Body mass index	up to 72,390 Japanese ancestry women, up to 85,894 Japanese ancestry men	up to 10,048 Japanese ancestry women, up to 5,098 Japanese ancestry men, up to 181,999 European ancestry women, up to 140,155 European ancestry controls	1q25.2	LOC101928778, SEC16B
chr1	177889479	177889480	rs543874	Graff M	2017-04-27	Genome-wide physical activity interactions in adiposity - A meta-analysis of 200,452 adults.	Body mass index in physically inactive individuals	561 African American women, 352 Filipino ancestry women, 725 Indian ancestry women, 19,366 European ancestry women, 251 African American men, 4,654 Indian ancestry men, 11,727 European ancestry men, 959 European ancestry individuals	1,437 African American women, 5,184 European ancestry women, 64 African American men, 5,416 European ancestry men	1q25.2	SEC16B	(women)
chr1	177889479	177889480	rs543874	Graff M	2017-04-27	Genome-wide physical activity interactions in adiposity - A meta-analysis of 200,452 adults.	Body mass index in physically inactive individuals	561 African American women, 352 Filipino ancestry women, 725 Indian ancestry women, 19,366 European ancestry women, 251 African American men, 4,654 Indian ancestry men, 11,727 European ancestry men, 959 European ancestry individuals	1,437 African American women, 5,184 European ancestry women, 64 African American men, 5,416 European ancestry men	1q25.2	SEC16B	(EA)
chr1	177889479	177889480	rs543874	Graff M	2017-04-27	Genome-wide physical activity interactions in adiposity - A meta-analysis of 200,452 adults.	Body mass index in physically inactive individuals	561 African American women, 352 Filipino ancestry women, 725 Indian ancestry women, 19,366 European ancestry women, 251 African American men, 4,654 Indian ancestry men, 11,727 European ancestry men, 959 European ancestry individuals	1,437 African American women, 5,184 European ancestry women, 64 African American men, 5,416 European ancestry men	1q25.2	SEC16B
chr1	177889479	177889480	rs543874	Graff M	2017-04-27	Genome-wide physical activity interactions in adiposity - A meta-analysis of 200,452 adults.	Body mass index in physically active individuals	1,957 African American women, 1,773 Filipino ancestry women, 305 Indian ancestry women, 67,609 European ancestry women, 1,206 African American men, 2,029 Indian ancestry men, 43,399 European ancestry men, at least 4,819 European ancestry individuals	4,807 African American women, 12,347 European ancestry women, 265 African American men, 14,540 European ancestry men	1q25.2	SEC16B	(women)
chr1	177889479	177889480	rs543874	Graff M	2017-04-27	Genome-wide physical activity interactions in adiposity - A meta-analysis of 200,452 adults.	Body mass index in physically active individuals	1,957 African American women, 1,773 Filipino ancestry women, 305 Indian ancestry women, 67,609 European ancestry women, 1,206 African American men, 2,029 Indian ancestry men, 43,399 European ancestry men, at least 4,819 European ancestry individuals	4,807 African American women, 12,347 European ancestry women, 265 African American men, 14,540 European ancestry men	1q25.2	SEC16B
chr1	177889479	177889480	rs543874	Graff M	2017-04-27	Genome-wide physical activity interactions in adiposity - A meta-analysis of 200,452 adults.	Body mass index in physically active individuals	1,957 African American women, 1,773 Filipino ancestry women, 305 Indian ancestry women, 67,609 European ancestry women, 1,206 African American men, 2,029 Indian ancestry men, 43,399 European ancestry men, at least 4,819 European ancestry individuals	4,807 African American women, 12,347 European ancestry women, 265 African American men, 14,540 European ancestry men	1q25.2	SEC16B	(EA,women)
chr1	177889479	177889480	rs543874	Graff M	2017-04-27	Genome-wide physical activity interactions in adiposity - A meta-analysis of 200,452 adults.	Body mass index in physically active individuals	1,957 African American women, 1,773 Filipino ancestry women, 305 Indian ancestry women, 67,609 European ancestry women, 1,206 African American men, 2,029 Indian ancestry men, 43,399 European ancestry men, at least 4,819 European ancestry individuals	4,807 African American women, 12,347 European ancestry women, 265 African American men, 14,540 European ancestry men	1q25.2	SEC16B	(men)
chr1	177889479	177889480	rs543874	Graff M	2017-04-27	Genome-wide physical activity interactions in adiposity - A meta-analysis of 200,452 adults.	Body mass index (joint analysis main effects and physical activity interaction)	2,518 African American women, 86,278 European ancestry women, 1,773 Filipino ancestry women, 1,030 Indian ancestry women, 1,457 African American men, 55,137 European ancestry men, 7,648 Indian ancestry men, 5,527 European ancestry individuals	6,244 African American women, 17,531 European ancestry women, 329 African American men, 19,956 European ancestry men	1q25.2	SEC16B	(EA, women)
chr1	177889479	177889480	rs543874	Graff M	2017-04-27	Genome-wide physical activity interactions in adiposity - A meta-analysis of 200,452 adults.	Body mass index (joint analysis main effects and physical activity interaction)	2,518 African American women, 86,278 European ancestry women, 1,773 Filipino ancestry women, 1,030 Indian ancestry women, 1,457 African American men, 55,137 European ancestry men, 7,648 Indian ancestry men, 5,527 European ancestry individuals	6,244 African American women, 17,531 European ancestry women, 329 African American men, 19,956 European ancestry men	1q25.2	SEC16B	(women)
chr1	177889479	177889480	rs543874	Graff M	2017-04-27	Genome-wide physical activity interactions in adiposity - A meta-analysis of 200,452 adults.	Body mass index (joint analysis main effects and physical activity interaction)	2,518 African American women, 86,278 European ancestry women, 1,773 Filipino ancestry women, 1,030 Indian ancestry women, 1,457 African American men, 55,137 European ancestry men, 7,648 Indian ancestry men, 5,527 European ancestry individuals	6,244 African American women, 17,531 European ancestry women, 329 African American men, 19,956 European ancestry men	1q25.2	SEC16B	(men)
chr1	177889479	177889480	rs543874	Graff M	2017-04-27	Genome-wide physical activity interactions in adiposity - A meta-analysis of 200,452 adults.	Body mass index (joint analysis main effects and physical activity interaction)	2,518 African American women, 86,278 European ancestry women, 1,773 Filipino ancestry women, 1,030 Indian ancestry women, 1,457 African American men, 55,137 European ancestry men, 7,648 Indian ancestry men, 5,527 European ancestry individuals	6,244 African American women, 17,531 European ancestry women, 329 African American men, 19,956 European ancestry men	1q25.2	SEC16B
chr1	177889479	177889480	rs543874	Graff M	2017-04-27	Genome-wide physical activity interactions in adiposity - A meta-analysis of 200,452 adults.	Body mass index (joint analysis main effects and physical activity interaction)	2,518 African American women, 86,278 European ancestry women, 1,773 Filipino ancestry women, 1,030 Indian ancestry women, 1,457 African American men, 55,137 European ancestry men, 7,648 Indian ancestry men, 5,527 European ancestry individuals	6,244 African American women, 17,531 European ancestry women, 329 African American men, 19,956 European ancestry men	1q25.2	SEC16B	(EA, men)
chr1	177889479	177889480	rs543874	Graff M	2017-04-27	Genome-wide physical activity interactions in adiposity - A meta-analysis of 200,452 adults.	Body mass index	2,518 African American women, 86,278 European ancestry women, 1,773 Filipino ancestry women, 1,030 Indian ancestry women, 1,457 African American men, 55,137 European ancestry men, 7,648 Indian ancestry men, 5,527 European ancestry individuals	6,244 African American women, 17,531 European ancestry women, 329 African American men, 19,956 European ancestry men	1q25.2	SEC16B	(women)
chr1	177889479	177889480	rs543874	Graff M	2017-04-27	Genome-wide physical activity interactions in adiposity - A meta-analysis of 200,452 adults.	Body mass index	2,518 African American women, 86,278 European ancestry women, 1,773 Filipino ancestry women, 1,030 Indian ancestry women, 1,457 African American men, 55,137 European ancestry men, 7,648 Indian ancestry men, 5,527 European ancestry individuals	6,244 African American women, 17,531 European ancestry women, 329 African American men, 19,956 European ancestry men	1q25.2	SEC16B
chr1	177889479	177889480	rs543874	Graff M	2017-04-27	Genome-wide physical activity interactions in adiposity - A meta-analysis of 200,452 adults.	Body mass index	2,518 African American women, 86,278 European ancestry women, 1,773 Filipino ancestry women, 1,030 Indian ancestry women, 1,457 African American men, 55,137 European ancestry men, 7,648 Indian ancestry men, 5,527 European ancestry individuals	6,244 African American women, 17,531 European ancestry women, 329 African American men, 19,956 European ancestry men	1q25.2	SEC16B	(men)
chr1	177889479	177889480	rs543874	Graff M	2017-04-27	Genome-wide physical activity interactions in adiposity - A meta-analysis of 200,452 adults.	Body mass index	2,518 African American women, 86,278 European ancestry women, 1,773 Filipino ancestry women, 1,030 Indian ancestry women, 1,457 African American men, 55,137 European ancestry men, 7,648 Indian ancestry men, 5,527 European ancestry individuals	6,244 African American women, 17,531 European ancestry women, 329 African American men, 19,956 European ancestry men	1q25.2	SEC16B	(EA)
chr1	177889479	177889480	rs543874	Graff M	2017-04-27	Genome-wide physical activity interactions in adiposity - A meta-analysis of 200,452 adults.	Body mass index	2,518 African American women, 86,278 European ancestry women, 1,773 Filipino ancestry women, 1,030 Indian ancestry women, 1,457 African American men, 55,137 European ancestry men, 7,648 Indian ancestry men, 5,527 European ancestry individuals	6,244 African American women, 17,531 European ancestry women, 329 African American men, 19,956 European ancestry men	1q25.2	SEC16B	(EA, men)
chr1	177889479	177889480	rs543874	Justice AE	2017-04-26	Genome-wide meta-analysis of 241,258 adults accounting for smoking behaviour identifies novel loci for obesity traits.	Body mass index (joint analysis main effects and smoking interaction)	98,173 European ancestry women, 64,373 European ancestry men, 5,829 European ancestry individuals, 10,500 African American/Afro-Caribbean ancestry women, 2,706 African American/Afro-Caribbean ancestry men, 1,030 Indian Asian ancestry women, 7,648 Indian Asian ancestry men, 1,793 Filipino ancestry women, 2,944 Hispanic/Latino ancestry women, 1,764 Hispanic/Latino ancestry men	21,496 European ancestry women, 24,385 European ancestry men, 118,364 European ancestry individuals, 2,326 African American/Afro-Caribbean ancestry women, 855 African American/Afro-Caribbean ancestry men	1q25.2	SEC16B	(women)
chr1	177889479	177889480	rs543874	Justice AE	2017-04-26	Genome-wide meta-analysis of 241,258 adults accounting for smoking behaviour identifies novel loci for obesity traits.	Body mass index (joint analysis main effects and smoking interaction)	98,173 European ancestry women, 64,373 European ancestry men, 5,829 European ancestry individuals, 10,500 African American/Afro-Caribbean ancestry women, 2,706 African American/Afro-Caribbean ancestry men, 1,030 Indian Asian ancestry women, 7,648 Indian Asian ancestry men, 1,793 Filipino ancestry women, 2,944 Hispanic/Latino ancestry women, 1,764 Hispanic/Latino ancestry men	21,496 European ancestry women, 24,385 European ancestry men, 118,364 European ancestry individuals, 2,326 African American/Afro-Caribbean ancestry women, 855 African American/Afro-Caribbean ancestry men	1q25.2	SEC16B
chr1	177889479	177889480	rs543874	Justice AE	2017-04-26	Genome-wide meta-analysis of 241,258 adults accounting for smoking behaviour identifies novel loci for obesity traits.	Body mass index (joint analysis main effects and smoking interaction)	98,173 European ancestry women, 64,373 European ancestry men, 5,829 European ancestry individuals, 10,500 African American/Afro-Caribbean ancestry women, 2,706 African American/Afro-Caribbean ancestry men, 1,030 Indian Asian ancestry women, 7,648 Indian Asian ancestry men, 1,793 Filipino ancestry women, 2,944 Hispanic/Latino ancestry women, 1,764 Hispanic/Latino ancestry men	21,496 European ancestry women, 24,385 European ancestry men, 118,364 European ancestry individuals, 2,326 African American/Afro-Caribbean ancestry women, 855 African American/Afro-Caribbean ancestry men	1q25.2	SEC16B	(men)
chr1	177889479	177889480	rs543874	Justice AE	2017-04-26	Genome-wide meta-analysis of 241,258 adults accounting for smoking behaviour identifies novel loci for obesity traits.	BMI in smokers	19,883 European ancestry women, up to 16,928 European ancestry men, up to 973 European ancestry individuals, 1,701 African American/Afro-Caribbean ancestry women, 903 African American/Afro-Caribbean ancestry men, 10 Indian Asian ancestry women, 957 Indian Asian ancestry men, 267 Filipino ancestry women, 475 Hispanic/Latino ancestry women, 446 Hispanic/Latino ancestry men	5,485 European ancestry women, 6,471 European ancestry men, 13,416 European ancestry individuals, 253 African American/Afro-Caribbean ancestry women, 208 African American/Afro-Caribbean ancestry men	1q25.2	SEC16B
chr1	177889479	177889480	rs543874	Justice AE	2017-04-26	Genome-wide meta-analysis of 241,258 adults accounting for smoking behaviour identifies novel loci for obesity traits.	BMI in smokers	19,883 European ancestry women, up to 16,928 European ancestry men, up to 973 European ancestry individuals, 1,701 African American/Afro-Caribbean ancestry women, 903 African American/Afro-Caribbean ancestry men, 10 Indian Asian ancestry women, 957 Indian Asian ancestry men, 267 Filipino ancestry women, 475 Hispanic/Latino ancestry women, 446 Hispanic/Latino ancestry men	5,485 European ancestry women, 6,471 European ancestry men, 13,416 European ancestry individuals, 253 African American/Afro-Caribbean ancestry women, 208 African American/Afro-Caribbean ancestry men	1q25.2	SEC16B	(women)
chr1	177889479	177889480	rs543874	Justice AE	2017-04-26	Genome-wide meta-analysis of 241,258 adults accounting for smoking behaviour identifies novel loci for obesity traits.	BMI in non-smokers	77,279 European ancestry women, 47,280 European ancestry men, 4,856 European ancestry individuals, 8,799 African American/Afro-Caribbean ancestry women, 1,803 African American/Afro-Caribbean ancestry men, 1,020 Indian Asian ancestry women, 6,691 Indian Asian ancestry men, 1,526 Filipino ancestry women, 2,469 Hispanic/Latino ancestry women, 1,318 Hispanic/Latino ancestry men	16,011 European ancestry women, 17,912 European ancestry men, 105,218 European ancestry individuals, 2,073 African American/Afro-Caribbean ancestry women, 647 African American/Afro-Caribbean ancestry men	1q25.2	SEC16B
chr1	177889479	177889480	rs543874	Justice AE	2017-04-26	Genome-wide meta-analysis of 241,258 adults accounting for smoking behaviour identifies novel loci for obesity traits.	BMI in non-smokers	77,279 European ancestry women, 47,280 European ancestry men, 4,856 European ancestry individuals, 8,799 African American/Afro-Caribbean ancestry women, 1,803 African American/Afro-Caribbean ancestry men, 1,020 Indian Asian ancestry women, 6,691 Indian Asian ancestry men, 1,526 Filipino ancestry women, 2,469 Hispanic/Latino ancestry women, 1,318 Hispanic/Latino ancestry men	16,011 European ancestry women, 17,912 European ancestry men, 105,218 European ancestry individuals, 2,073 African American/Afro-Caribbean ancestry women, 647 African American/Afro-Caribbean ancestry men	1q25.2	SEC16B	(women)
chr1	177889479	177889480	rs543874	Justice AE	2017-04-26	Genome-wide meta-analysis of 241,258 adults accounting for smoking behaviour identifies novel loci for obesity traits.	BMI in non-smokers	77,279 European ancestry women, 47,280 European ancestry men, 4,856 European ancestry individuals, 8,799 African American/Afro-Caribbean ancestry women, 1,803 African American/Afro-Caribbean ancestry men, 1,020 Indian Asian ancestry women, 6,691 Indian Asian ancestry men, 1,526 Filipino ancestry women, 2,469 Hispanic/Latino ancestry women, 1,318 Hispanic/Latino ancestry men	16,011 European ancestry women, 17,912 European ancestry men, 105,218 European ancestry individuals, 2,073 African American/Afro-Caribbean ancestry women, 647 African American/Afro-Caribbean ancestry men	1q25.2	SEC16B	(men)
chr1	177889479	177889480	rs543874	Justice AE	2017-04-26	Genome-wide meta-analysis of 241,258 adults accounting for smoking behaviour identifies novel loci for obesity traits.	BMI (adjusted for smoking behaviour)	98,173 European ancestry women, 64,373 European ancestry men, 5,829 European ancestry individuals, 10,500 African American/Afro-Caribbean ancestry women, 2,706 African American/Afro-Caribbean ancestry men, 1,030 Indian Asian ancestry women, 7,648 Indian Asian ancestry men, 1,793 Filipino ancestry women, 2,944 Hispanic/Latino ancestry women, 1,764 Hispanic/Latino ancestry men	21,496 European ancestry women, 24,385 European ancestry men, 118,364 European ancestry individuals, 2,326 African American/Afro-Caribbean ancestry women, 855 African American/Afro-Caribbean ancestry men	1q25.2	SEC16B	(women)
chr1	177889479	177889480	rs543874	Justice AE	2017-04-26	Genome-wide meta-analysis of 241,258 adults accounting for smoking behaviour identifies novel loci for obesity traits.	BMI (adjusted for smoking behaviour)	98,173 European ancestry women, 64,373 European ancestry men, 5,829 European ancestry individuals, 10,500 African American/Afro-Caribbean ancestry women, 2,706 African American/Afro-Caribbean ancestry men, 1,030 Indian Asian ancestry women, 7,648 Indian Asian ancestry men, 1,793 Filipino ancestry women, 2,944 Hispanic/Latino ancestry women, 1,764 Hispanic/Latino ancestry men	21,496 European ancestry women, 24,385 European ancestry men, 118,364 European ancestry individuals, 2,326 African American/Afro-Caribbean ancestry women, 855 African American/Afro-Caribbean ancestry men	1q25.2	SEC16B	(men)
chr1	177889479	177889480	rs543874	Justice AE	2017-04-26	Genome-wide meta-analysis of 241,258 adults accounting for smoking behaviour identifies novel loci for obesity traits.	BMI (adjusted for smoking behaviour)	98,173 European ancestry women, 64,373 European ancestry men, 5,829 European ancestry individuals, 10,500 African American/Afro-Caribbean ancestry women, 2,706 African American/Afro-Caribbean ancestry men, 1,030 Indian Asian ancestry women, 7,648 Indian Asian ancestry men, 1,793 Filipino ancestry women, 2,944 Hispanic/Latino ancestry women, 1,764 Hispanic/Latino ancestry men	21,496 European ancestry women, 24,385 European ancestry men, 118,364 European ancestry individuals, 2,326 African American/Afro-Caribbean ancestry women, 855 African American/Afro-Caribbean ancestry men	1q25.2	SEC16B
chr1	177889479	177889480	rs543874	Ng MCY	2017-04-21	Discovery and fine-mapping of adiposity loci using high density imputation of genome-wide association studies in individuals of African ancestry: African Ancestry Anthropometry Genetics Consortium.	Body mass index (adult)	16,559 African ancestry men, 26,193 African ancestry women	2,458 African ancestry men, 7,685 African ancestry women, 152,893 European ancestry men, 171,977 European ancestry women	1q25.2	SEC16B
chr1	177889479	177889480	rs543874	Ng MCY	2017-04-21	Discovery and fine-mapping of adiposity loci using high density imputation of genome-wide association studies in individuals of African ancestry: African Ancestry Anthropometry Genetics Consortium.	Body mass index (adult)	16,559 African ancestry men, 26,193 African ancestry women	2,458 African ancestry men, 7,685 African ancestry women, 152,893 European ancestry men, 171,977 European ancestry women	1q25.2	SEC16B	(AA, Women)
chr1	177889479	177889480	rs543874	Ng MCY	2017-04-21	Discovery and fine-mapping of adiposity loci using high density imputation of genome-wide association studies in individuals of African ancestry: African Ancestry Anthropometry Genetics Consortium.	Body mass index (adult)	16,559 African ancestry men, 26,193 African ancestry women	2,458 African ancestry men, 7,685 African ancestry women, 152,893 European ancestry men, 171,977 European ancestry women	1q25.2	SEC16B	(AA)
chr1	177889479	177889480	rs543874	Wood AR	2016-03-10	Variants in the FTO and CDKAL1 loci have recessive effects on risk of obesity and type 2 diabetes, respectively.	Body mass index	29,925 British ancestry cases, 89,763 British ancestry controls	NA	1q25.2	SEC16B	(additive model)
chr1	177889479	177889480	rs543874	Lu Y	2016-02-01	New loci for body fat percentage reveal link between adiposity and cardiometabolic disease risk.	Body fat percentage	Up to 31,457 European ancestry men, up to 35,030 European ancestry women, up to 8,259 Indian Asian ancestry men, up to 1,030 Indian Asian ancestry women, 973 Korean ancestry men, 1,360 Korean ancestry women, 154 African American men, 262 African American women	Up to 12,480 European ancestry men, up to 10,055 European ancestry women, 315 Jamaican ancestry men, 774 Jamaican ancestry women	1q25.2	SEC16B	(women)
chr1	177889479	177889480	rs543874	Lu Y	2016-02-01	New loci for body fat percentage reveal link between adiposity and cardiometabolic disease risk.	Body fat percentage	Up to 31,457 European ancestry men, up to 35,030 European ancestry women, up to 8,259 Indian Asian ancestry men, up to 1,030 Indian Asian ancestry women, 973 Korean ancestry men, 1,360 Korean ancestry women, 154 African American men, 262 African American women	Up to 12,480 European ancestry men, up to 10,055 European ancestry women, 315 Jamaican ancestry men, 774 Jamaican ancestry women	1q25.2	SEC16B
chr1	177889479	177889480	rs543874	Lu Y	2016-02-01	New loci for body fat percentage reveal link between adiposity and cardiometabolic disease risk.	Body fat percentage	Up to 31,457 European ancestry men, up to 35,030 European ancestry women, up to 8,259 Indian Asian ancestry men, up to 1,030 Indian Asian ancestry women, 973 Korean ancestry men, 1,360 Korean ancestry women, 154 African American men, 262 African American women	Up to 12,480 European ancestry men, up to 10,055 European ancestry women, 315 Jamaican ancestry men, 774 Jamaican ancestry women	1q25.2	SEC16B	(European)
chr1	177889479	177889480	rs543874	Felix JF	2015-11-24	Genome-wide association analysis identifies three new susceptibility loci for childhood body mass index.	Childhood body mass index	34,744 European ancestry children	11,313 European ancestry children	1q25.2	SEC16B
chr1	177889479	177889480	rs543874	Felix JF	2015-11-24	Genome-wide association analysis identifies three new susceptibility loci for childhood body mass index.	Childhood body mass index	34,744 European ancestry children	11,313 European ancestry children	1q25.2	NR
chr1	177889479	177889480	rs543874	Winkler TW	2015-10-01	The Influence of Age and Sex on Genetic Associations with Adult Body Size and Shape: A Large-Scale Genome-Wide Interaction Study.	Body mass index	up to 309,889 European ancestry individuals	NA	1q25.2	NR
chr1	177889479	177889480	rs543874	Locke AE	2015-02-12	Genetic studies of body mass index yield new insights for obesity biology.	Body mass index	up to 104,666 European ancestry male individuals, up to 132,115 European ancestry female individuals, 370 African American male individuals, 517 African American female individuals, 512 Hispanic male individuals, 764 Hispanic female individuals	up to 48,274 European ancestry male individuals, up to 39,864 European ancestry female individuals, 2,441 African American or Afro-Caribbean male individuals, 6,314 African American or Afro-Caribbean female individuals, 919 Filipino male individuals, 828 Filipino female individuals, 205 Seychellois male individuals, 287 Seychellois female individuals, 2,964 South Asian ancestry male individuals, …	1q25.2	SEC16B
chr1	177889479	177889480	rs543874	Locke AE	2015-02-12	Genetic studies of body mass index yield new insights for obesity biology.	Body mass index	up to 104,666 European ancestry male individuals, up to 132,115 European ancestry female individuals, 370 African American male individuals, 517 African American female individuals, 512 Hispanic male individuals, 764 Hispanic female individuals	up to 48,274 European ancestry male individuals, up to 39,864 European ancestry female individuals, 2,441 African American or Afro-Caribbean male individuals, 6,314 African American or Afro-Caribbean female individuals, 919 Filipino male individuals, 828 Filipino female individuals, 205 Seychellois male individuals, 287 Seychellois female individuals, 2,964 South Asian ancestry male individuals, …	1q25.2	SEC16B	(EA, women)
chr1	177889479	177889480	rs543874	Locke AE	2015-02-12	Genetic studies of body mass index yield new insights for obesity biology.	Body mass index	up to 104,666 European ancestry male individuals, up to 132,115 European ancestry female individuals, 370 African American male individuals, 517 African American female individuals, 512 Hispanic male individuals, 764 Hispanic female individuals	up to 48,274 European ancestry male individuals, up to 39,864 European ancestry female individuals, 2,441 African American or Afro-Caribbean male individuals, 6,314 African American or Afro-Caribbean female individuals, 919 Filipino male individuals, 828 Filipino female individuals, 205 Seychellois male individuals, 287 Seychellois female individuals, 2,964 South Asian ancestry male individuals, …	1q25.2	SEC16B	(EA)
chr1	177889479	177889480	rs543874	Locke AE	2015-02-12	Genetic studies of body mass index yield new insights for obesity biology.	Body mass index	up to 104,666 European ancestry male individuals, up to 132,115 European ancestry female individuals, 370 African American male individuals, 517 African American female individuals, 512 Hispanic male individuals, 764 Hispanic female individuals	up to 48,274 European ancestry male individuals, up to 39,864 European ancestry female individuals, 2,441 African American or Afro-Caribbean male individuals, 6,314 African American or Afro-Caribbean female individuals, 919 Filipino male individuals, 828 Filipino female individuals, 205 Seychellois male individuals, 287 Seychellois female individuals, 2,964 South Asian ancestry male individuals, …	1q25.2	SEC16B	(EA, men)
chr1	177889479	177889480	rs543874	Shungin D	2015-02-12	New genetic loci link adipose and insulin biology to body fat distribution.	Hip circumference	up to 56,910 European ancestry men, up to 86,570 European ancestry women	up to 36,570 European ancestry men, 30,172 European ancestry women, 915 Filipino ancestry men, 735 Filipino ancestry women, 2,351 African American/Afro-Caribbean ancestry men, 6,258 African American/Afro-Caribbean ancestry women, 2,285 South Asian ancestry men, 506 South Asian ancestry women, 195 Seychellois ancestry men, 266 Seychellois ancestry women	1q25.2	SEC16B	(EA, men)
chr1	177889479	177889480	rs543874	Shungin D	2015-02-12	New genetic loci link adipose and insulin biology to body fat distribution.	Hip circumference	up to 56,910 European ancestry men, up to 86,570 European ancestry women	up to 36,570 European ancestry men, 30,172 European ancestry women, 915 Filipino ancestry men, 735 Filipino ancestry women, 2,351 African American/Afro-Caribbean ancestry men, 6,258 African American/Afro-Caribbean ancestry women, 2,285 South Asian ancestry men, 506 South Asian ancestry women, 195 Seychellois ancestry men, 266 Seychellois ancestry women	1q25.2	SEC16B	(EA)
chr1	177889479	177889480	rs543874	Shungin D	2015-02-12	New genetic loci link adipose and insulin biology to body fat distribution.	Hip circumference	up to 56,910 European ancestry men, up to 86,570 European ancestry women	up to 36,570 European ancestry men, 30,172 European ancestry women, 915 Filipino ancestry men, 735 Filipino ancestry women, 2,351 African American/Afro-Caribbean ancestry men, 6,258 African American/Afro-Caribbean ancestry women, 2,285 South Asian ancestry men, 506 South Asian ancestry women, 195 Seychellois ancestry men, 266 Seychellois ancestry women	1q25.2	SEC16B	(EA,women)
chr1	177889479	177889480	rs543874	Perry JR	2014-07-23	Parent-of-origin-specific allelic associations among 106 genomic loci for age at menarche.	Menarche (age at onset)	Up to 182,413 European ancestry females	NA	1q25.2	SEC16B
chr1	177889479	177889480	rs543874	Graff M	2013-05-12	Genome-wide analysis of BMI in adolescents and young adults reveals additional insight into the effects of genetic loci over the life course.	Body mass index	Up to 13,627 European ancestry individuals	Up to 16,253 European ancestry individuals	1q25.2	SEC16B
chr1	177889479	177889480	rs543874	Monda KL	2013-04-14	A meta-analysis identifies new loci associated with body mass index in individuals of African ancestry.	Body mass index	37,956 African American individuals, 1,188 Nigerian ancestry individuals	27,661 African America/Afro-Caribbean individuals, 4,607 Sub-Saharan African ancestry individuals, 123,706 European ancestry inidividuals	1q25.2	SEC16B	(AA and Sub-Saharan)
chr1	177889479	177889480	rs543874	Speliotes EK	2010-10-10	Association analyses of 249,796 individuals reveal 18 new loci associated with body mass index.	Body mass index	Up to 123,865 European ancestry individuals	Up to 125,931 European ancestry individuals	1q25.2	SEC16B
chr1	177894029	177894030	rs144662465	Zhu Z	2019-10-24	Shared Genetic and Experimental Links between Obesity-Related Traits and Asthma Subtypes in UK Biobank.	Body mass index	457,822 European ancestry individuals	NA	1q25.2	NR
chr1	177894286	177894287	rs506589	Niarchou M	2020-02-03	Genome-wide association study of dietary intake in the UK biobank study and its associations with schizophrenia and other traits.	Meat-related diet	154,123 European ancestry men, 181,453 European ancestry women	NA	1q25.2	SEC16B
chr1	177894286	177894287	rs506589	Riveros-McKay F	2019-01-24	Genetic architecture of human thinness compared to severe obesity.	Obese vs. thin	1,456 British ancestry obese children, 1,471 European ancestry thin adults	up to 7,526 British ancestry obese individuals, 7,962 obese individuals, up to 3,532 British ancestry thin individuals, 8,106 thin individuals	1q25.2	SEC16B
chr1	177894286	177894287	rs506589	Kichaev G	2018-12-27	Leveraging Polygenic Functional Enrichment to Improve GWAS Power.	Menarche (age at onset)	approximately 242,000 European ancestry individuals	NA	1q25.2
chr1	177894590	177894591	rs509325	Niarchou M	2020-02-03	Genome-wide association study of dietary intake in the UK biobank study and its associations with schizophrenia and other traits.	Meat-related diet	154,123 European ancestry men, 181,453 European ancestry women	NA	1q25.2	SEC16B	(female)
chr1	177897974	177897975	rs8030	Zhong VW	2019-05-02	A genome-wide association study of bitter and sweet beverage consumption.	Bitter non-alcoholic beverage consumption	85,852 European ancestry individuals	39,924 European ancestry individuals	1q25.2	SEC16B
chr1	177898798	177898799	rs623479	Zhu Z	2019-10-24	Shared Genetic and Experimental Links between Obesity-Related Traits and Asthma Subtypes in UK Biobank.	Body mass index	457,822 European ancestry individuals	NA	1q25.2	NR
chr1	177899120	177899121	rs545608	Vujkovic M	2020-06-15	Discovery of 318 new risk loci for type 2 diabetes and related vascular outcomes among 1.4 million participants in a multi-ancestry meta-analysis.	Type 2 diabetes	148,726 European ancestry cases, 965,732 European ancestry controls	NA	1q25.2	NR
chr1	177899120	177899121	rs545608	Wang H	2019-08-14	Genotype-by-environment interactions inferred from genetic effects on phenotypic variability in the UK Biobank.	Body mass index variance	346,393 European ancestry individuals	NA	1q25.2	SEC16B
chr1	177899120	177899121	rs545608	Wang H	2019-08-14	Genotype-by-environment interactions inferred from genetic effects on phenotypic variability in the UK Biobank.	Body mass index	346,393 European ancestry individuals	NA	1q25.2	SEC16B
chr1	177899120	177899121	rs545608	Kou I	2019-08-15	Genome-wide association study identifies 14 previously unreported susceptibility loci for adolescent idiopathic scoliosis in Japanese.	Adolescent idiopathic scoliosis	5,004 Japanese ancestry female cases, 33,679 Japanese ancestry female controls	NA	1q25.2	SEC16B
chr1	177899120	177899121	rs545608	Rask-Andersen M	2019-01-21	Genome-wide association study of body fat distribution identifies adiposity loci and sex-specific genetic effects.	Body fat distribution (leg fat ratio)	55,006 British ancestry males, 61,132 British ancestry females	112,425 British ancestry males, 133,936 British ancestry females	1q25.2	SEC16B	(females)
chr1	177899120	177899121	rs545608	Rask-Andersen M	2019-01-21	Genome-wide association study of body fat distribution identifies adiposity loci and sex-specific genetic effects.	Body fat distribution (leg fat ratio)	55,006 British ancestry males, 61,132 British ancestry females	112,425 British ancestry males, 133,936 British ancestry females	1q25.2	SEC16B
chr1	177899120	177899121	rs545608	Rask-Andersen M	2019-01-21	Genome-wide association study of body fat distribution identifies adiposity loci and sex-specific genetic effects.	Body fat distribution (arm fat ratio)	55,006 British ancestry males, 61,132 British ancestry females	112,425 British ancestry males, 133,936 British ancestry females	1q25.2	SEC16B	(females)
chr1	177899120	177899121	rs545608	Rask-Andersen M	2019-01-21	Genome-wide association study of body fat distribution identifies adiposity loci and sex-specific genetic effects.	Body fat distribution (arm fat ratio)	55,006 British ancestry males, 61,132 British ancestry females	112,425 British ancestry males, 133,936 British ancestry females	1q25.2	SEC16B	(males)
chr1	177899120	177899121	rs545608	Rask-Andersen M	2019-01-21	Genome-wide association study of body fat distribution identifies adiposity loci and sex-specific genetic effects.	Body fat distribution (arm fat ratio)	55,006 British ancestry males, 61,132 British ancestry females	112,425 British ancestry males, 133,936 British ancestry females	1q25.2	SEC16B
chr1	177899120	177899121	rs545608	Tachmazidou I	2017-06-01	Whole-Genome Sequencing Coupled to Imputation Discovers Genetic Signals for Anthropometric Traits.	Body mass index	1,249 whole genome sequenced European ancestry individuals, 3,538 whole genome sequenced individuals, 46,635 European ancestry individuals, 472 Carlantino (founder/genetic isolate) individuals, 1,170 Friuli Venezia Giulia (founder/genetic isolate) individuals, 1,019 Mylopotamos (founder/genetic isolate) individuals, 932 Pomak (founder/genetic isolate) individuals, 1,778 Val Borbera (founder/genet…	209,191 European ancestry individuals	1q25.2	SEC16B, RP4-798P15.3
chr1	177900097	177900098	rs575908	Michailidou K	2017-10-23	Association analysis identifies 65 new breast cancer risk loci.	Breast cancer	76,192 European ancestry cases, 63,082 European ancestry controls	46,785 European ancestry cases, 42,892 European ancestry controls, 14,068 East Asian ancestry cases, 13,104 East Asian ancestry controls	1q25.2	NR	(EA)
chr1	177902752	177902753	rs591120	Turcot V	2017-12-22	Protein-altering variants associated with body mass index implicate pathways that control energy intake and expenditure in obesity.	Body mass index	up to 449,889 European ancestry individuals, up to 29,398 South Asian ancestry individuals, up to 27,610 African American individuals, up to 8,839 East Asian individuals, up to 10,772 Hispanic ancestry individuals	up to 196,766 European ancestry individuals	1q25.2	SEC16B
chr1	177902752	177902753	rs591120	Winkler TW	2015-10-01	The Influence of Age and Sex on Genetic Associations with Adult Body Size and Shape: A Large-Scale Genome-Wide Interaction Study.	Body mass index x sex x age interaction (4df test)	up to 51,625 European ancestry men aged <50, up to 60,654 European ancestry women aged <50, up to 90,988 European ancestry men aged >50, up to 106,622 European ancestry women aged >50	NA	1q25.2	SEC16B, RASAL2, LOC7030102, RASAL2-AS1
chr1	177902752	177902753	rs591120	Winkler TW	2015-10-01	The Influence of Age and Sex on Genetic Associations with Adult Body Size and Shape: A Large-Scale Genome-Wide Interaction Study.	Body mass index (age <50)	up to 51,625 European ancestry men, up to 60,654 European ancestry women	NA	1q25.2	SEC16B, RASAL2, LOC7030102, RASAL2-AS1
chr1	177902752	177902753	rs591120	Winkler TW	2015-10-01	The Influence of Age and Sex on Genetic Associations with Adult Body Size and Shape: A Large-Scale Genome-Wide Interaction Study.	Body mass index	up to 309,889 European ancestry individuals	NA	1q25.2	SEC16B, RASAL2, LOC7030102, RASAL2-AS1
chr1	177904494	177904495	rs10489882	Zhu Z	2019-10-24	Shared Genetic and Experimental Links between Obesity-Related Traits and Asthma Subtypes in UK Biobank.	Body mass index	457,822 European ancestry individuals	NA	1q25.2	NR
chr1	177913518	177913519	rs10913469	Lind L	2019-10-07	Genome-Wide Association Study of the Metabolic Syndrome in UK Biobank.	Metabolic syndrome	291,107 European ancestry individuals	NA	1q25.2	SEC16B
chr1	177913518	177913519	rs10913469	Wang H	2019-08-14	Genotype-by-environment interactions inferred from genetic effects on phenotypic variability in the UK Biobank.	Waist circumference variance	347,158 European ancestry individuals	NA	1q25.2	SEC16B
chr1	177913518	177913519	rs10913469	Wang H	2019-08-14	Genotype-by-environment interactions inferred from genetic effects on phenotypic variability in the UK Biobank.	Waist circumference	347,158 European ancestry individuals	NA	1q25.2	SEC16B
chr1	177913518	177913519	rs10913469	Wojcik GL	2019-06-19	Genetic analyses of diverse populations improves discovery for complex traits.	Body mass index	17,127 African American individuals, 21,955 Hispanic/Latino individuals, 4,647 Asian ancestry individuals, 3,936 Native Hawaiian ancestry individuals, 645 Native American ancestry individuals, 1,025 individuals	NA	1q25.2	NR
chr1	177913518	177913519	rs10913469	Thorleifsson G	2008-12-14	Genome-wide association yields new sequence variants at seven loci that associate with measures of obesity.	Weight	72,598 European ancestry individuals, 1,160 African American individuals	Up to 11,036 European ancestry individuals, 32,615 individuals	1q25.2	SEC16B, RASAL2
chr1	177913518	177913519	rs10913469	Thorleifsson G	2008-12-14	Genome-wide association yields new sequence variants at seven loci that associate with measures of obesity.	Body mass index	72,598 European ancestry individuals, 1,160 African American individuals	Up to 11,036 European ancestry individuals, 32,615 individuals	1q25.2	SEC16B, RASAL2
chr1	177914727	177914728	rs560415	Zhu Z	2019-10-24	Shared Genetic and Experimental Links between Obesity-Related Traits and Asthma Subtypes in UK Biobank.	Body mass index	457,822 European ancestry individuals	NA	1q25.2	NR
chr1	177924577	177924578	rs61816282	Zhu Z	2019-10-24	Shared Genetic and Experimental Links between Obesity-Related Traits and Asthma Subtypes in UK Biobank.	Body mass index	457,822 European ancestry individuals	NA	1q25.2	NR
chr1	177929553	177929554	rs10913472	Luo A	2019-08-29	Epigenetic aging is accelerated in alcohol use disorder and regulated by genetic variation in APOL2.	Epigenetic age acceleration in alcohol use disorder	154 European ancestry individuals, 156 African American individuals	NA	1q25.2	SEC16B	(AA)
chr1	177934590	177934591	rs6679120	Zhu Z	2019-10-24	Shared Genetic and Experimental Links between Obesity-Related Traits and Asthma Subtypes in UK Biobank.	Body mass index	457,822 European ancestry individuals	NA	1q25.2	NR
chr1	177938436	177938437	rs6682862	Chen VL	2021-02-05	Genome-wide association study of serum liver enzymes implicates diverse metabolic and liver pathology.	Serum alkaline phosphatase levels	390,964 European ancestry individuals	105,030 East Asian ancestry individuals	1q25.2	SEC16B
chr1	177967004	177967005	rs35308250	Zhu Z	2019-10-24	Shared Genetic and Experimental Links between Obesity-Related Traits and Asthma Subtypes in UK Biobank.	Body mass index	457,822 European ancestry individuals	NA	1q25.2	NR
chr1	177978858	177978859	rs79295525	Zhu Z	2019-10-24	Shared Genetic and Experimental Links between Obesity-Related Traits and Asthma Subtypes in UK Biobank.	Body mass index	457,822 European ancestry individuals	NA	1q25.2	NR
chr1	178026293	178026294	rs7520853	Chen MH	2020-09-01	Trans-ethnic and Ancestry-Specific Blood-Cell Genetics in 746,667 Individuals from 5 Global Populations.	White blood cell count	15,061 African American or Afro-Caribbean and African ancestry individuals	NA	1q25.2	NR
chr1	178028710	178028711	rs4652291	Chen MH	2020-09-01	Trans-ethnic and Ancestry-Specific Blood-Cell Genetics in 746,667 Individuals from 5 Global Populations.	Neutrophil count	13,476 African American or Afro-Caribbean and African ancestry individuals	NA	1q25.2	NR
chr1	178039225	178039226	rs16852403	Tian C	2017-09-19	Genome-wide association and HLA region fine-mapping studies identify susceptibility loci for multiple common infections.	Childhood ear infection	46,936 European ancestry cases, 74,874 European ancestry controls	NA	1q25.2	NR
chr1	178064546	178064547	rs75718887	Vuckovic D	2020-09-01	The Polygenic and Monogenic Basis of Blood Traits and Diseases.	Plateletcrit	408,112 British individuals	NA	1q25.2	RASAL2
chr1	178071169	178071170	rs12143791	Chen MH	2020-09-01	Trans-ethnic and Ancestry-Specific Blood-Cell Genetics in 746,667 Individuals from 5 Global Populations.	Platelet count	542,827 European ancestry individuals	NA	1q25.2	NR
chr1	178100218	178100219	rs186197500	Ikeda M	2017-01-24	A genome-wide association study identifies two novel susceptibility loci and trans population polygenicity associated with bipolar disorder.	Bipolar disorder	2,964 Japanese ancestry case, 61,887 Japanese ancestry controls, 7,481 European ancestry cases, 9,250 European ancestry controls	NA	1q25.2	RASAL2	(Japanese)
chr1	178118750	178118751	rs143934543	Sun BB	2018-06-06	Genomic atlas of the human plasma proteome.	Blood protein levels	3,301 European ancestry individuals	NA	1q25.2	NR	(Angiopoietin-related protein 1, ANGPTL1.11142.11.3)
chr1	178142207	178142208	rs316274	Ovsyannikova IG	2012-04-25	Genome-wide association study of antibody response to smallpox vaccine.	Immune response to smallpox vaccine (IL-6)	217 African American individuals, 580 European ancestry individuals, 217 Hispanic individuals	NA	1q25.2	RASAL2	(AA)
chr1	178221224	178221225	rs519464	Chen MH	2020-09-01	Trans-ethnic and Ancestry-Specific Blood-Cell Genetics in 746,667 Individuals from 5 Global Populations.	White blood cell count	746,667 African American or Afro-Caribbean, African ancestry, European ancestry, East Asian ancestry, Hispanic or Latin American and South Asian ancestry individuals	NA	1q25.2	NR
# region=chr11:46596982-47596981												Header
chr11	46599247	46599248	rs11038927	Lam M	2019-08-01	Pleiotropic Meta-Analysis of Cognition, Education, and Schizophrenia Differentiates Roles of Early Neurodevelopmental and Adult Synaptic Pathways.	Cognitive ability, years of educational attainment or schizophrenia (pleiotropy)	328,917 individuals with educational attainment measurements, 107,207 individuals with cognitive ability measurements, 77,096 European ancestry schizophrenia cases, 43,456 European ancestry controls	NA	11p11.2	AMBRA1
chr11	46605281	46605282	rs149747817	Garman L	2020-03-06	Genome-Wide Association Study of Ocular Sarcoidosis Confirms HLA Associations and Implicates Barrier Function and Autoimmunity in African Americans.	Ocular sarcoidosis	260 African American cases, 1,551 African American controls	NA	11p11.2	NR
chr11	46632808	46632809	rs112282219	Wootton RE	2019-11-06	Evidence for causal effects of lifetime smoking on risk for depression and schizophrenia: a Mendelian randomisation study.	Lifetime smoking index	462,690 European ancestry individuals	NA	11p11.2
chr11	46676356	46676357	rs10769204	Day FR	2016-04-18	Physical and neurobehavioral determinants of reproductive onset and success.	Age at first sexual intercourse	59,357 British ancestry males, 66,310 British ancestry females	NA	11p11.2	ATG13
chr11	46691604	46691605	rs139556855	Ahola-Olli AV	2016-12-13	Genome-wide Association Study Identifies 27 Loci Influencing Concentrations of Circulating Cytokines and Growth Factors.	Interleukin-17 levels	7,760 Finnish ancestry individuals	NA	11p11.2	NR
chr11	46691736	46691737	rs4606447	Davies G	2018-05-29	Study of 300,486 individuals identifies 148 independent genetic loci influencing general cognitive function.	Reaction time	330,069 European ancestry individuals	NA	11p11.2	ATG13
chr11	46695482	46695483	rs56349329	Meng W	2018-01-31	A Genome-Wide Association Study Finds Genetic Associations with Broadly-Defined Headache in UK Biobank (N=223,773).	Headache	74,461 British ancestry cases, 149,321 British ancestry controls	NA	11p11.2	ATG13
chr11	46702690	46702691	rs4319473	Jansen PR	2019-02-25	Genome-wide analysis of insomnia in 1,331,010 individuals identifies new risk loci and functional pathways.	Morningness	434,835 European ancestry individuals	NA	11p11.2
chr11	46711777	46711778	rs10838613	Davies G	2018-05-29	Study of 300,486 individuals identifies 148 independent genetic loci influencing general cognitive function.	Reaction time	330,069 European ancestry individuals	NA	11p11.2	ARHGAP1
chr11	46711853	46711854	rs7926389	Lam M	2019-11-18	Comparative genetic architectures of schizophrenia in East Asian and European populations.	Schizophrenia	22,778 East Asian ancestry cases, 35,362 East Asian ancestry controls, 33,640 European ancestry cases, 43,456 European ancestry controls	NA	11p11.2	NR
chr11	46720156	46720157	rs764166931	Kim SK	2018-07-26	Identification of 613 new loci associated with heel bone mineral density and a polygenic risk score for bone mineral density, osteoporosis and fracture.	Heel bone mineral density	394,929 European ancestry individuals	NA	11p11.2
chr11	46722220	46722221	rs7932354	Estrada K	2012-04-15	Genome-wide meta-analysis identifies 56 bone mineral density loci and reveals 14 loci associated with risk of fracture.	Femoral neck bone mineral density	Up to 32,961 European and East Asian ancestry individuals	Up to 50,933 European and East Asian ancestry individuals	11p11.2	ARHGAP1
chr11	46722220	46722221	rs7932354	Rivadeneira F	2009-10-04	Twenty bone-mineral-density loci identified by large-scale meta-analysis of genome-wide association studies.	Bone mineral density (hip)	19,195 European ancestry individuals	NA	11p11.2	ARHGAP1
chr11	46723936	46723937	rs12361673	Pei YF	2018-02-27	Joint study of two genome-wide association meta-analyses identified 20p12.1 and 20q13.33 for bone mineral density.	Femoral neck bone mineral density	up to 4,692 European ancestry individuals, up to 1,539 Han Chinese ancestry individuals, up to 849 African American individuals, up to 446 Hispanic individuals, 2,882 European ancestry whole-genome sequenced individuals, 3,549 European ancestry whole-exome sequenced individuals, 26,534 European ancestry non-array genotype imputed individuals	NA	11p11.2	ZNF408
chr11	46728965	46728966	rs61337452	Chen MH	2020-09-01	Trans-ethnic and Ancestry-Specific Blood-Cell Genetics in 746,667 Individuals from 5 Global Populations.	Monocyte count	639,696 African American or Afro-Caribbean, African ancestry, European ancestry, East Asian ancestry, Hispanic or Latin American and South Asian ancestry individuals	NA	11p11.2	NR
chr11	46730521	46730522	rs11606709	Medina-Gomez C	2018-01-04	Life-Course Genome-wide Association Study Meta-analysis of Total Body BMD and Assessment of Age-Specific Effects.	Total body bone mineral density	56,284 European ancestry individuals, up to 1,333 African American individuals, up to 9,328 admixed individuals	NA	11p11.2	NR	(European)
chr11	46737411	46737412	rs113001570	Liu M	2019-01-14	Association studies of up to 1.2 million individuals yield new insights into the genetic etiology of tobacco and alcohol use.	Smoking behaviour (cigarettes smoked per day)	up to 377,334 European ancestry individuals	NA	11p11.2	NR
chr11	46741494	46741495	rs2070850	Kanai M	2018-02-05	Genetic analysis of quantitative traits in the Japanese population links cell types to complex human diseases.	Prothrombin time	58,110 Japanese ancestry individuals	NA	11p11.2	F2
chr11	46743246	46743247	rs3136441	Bentley AR	2019-03-29	Multi-ancestry genome-wide gene-smoking interaction study of 387,272 individuals identifies new loci associated with serum lipids.	HDL cholesterol levels	up to 23,761 African ancestry individuals, 13,171 Asian ancestry individuals, up to 90,272 European ancestry individuals, 6,620 Hispanic individuals	NA	11p11.2
chr11	46743246	46743247	rs3136441	Hoffmann TJ	2018-03-05	A large electronic-health-record-based genome-wide study of serum lipids.	High density lipoprotein cholesterol levels	76,627 European ancestry individuals, 7,795 Hispanic individuals, 6,855 East Asian ancestry individuals, 2,958 African American individuals, 439 South Asian ancestry individuals	NA	11p11.2	NR
chr11	46743246	46743247	rs3136441	Hoffmann TJ	2018-03-05	A large electronic-health-record-based genome-wide study of serum lipids.	High density lipoprotein cholesterol levels	76,627 European ancestry individuals, 7,795 Hispanic individuals, 6,855 East Asian ancestry individuals, 2,958 African American individuals, 439 South Asian ancestry individuals	NA	11p11.2	NR	(EA)
chr11	46743246	46743247	rs3136441	Willer CJ	2013-10-06	Discovery and refinement of loci associated with lipid levels.	HDL cholesterol	94,595 European ancestry individuals	93,982 European ancestry individuals	11p11.2	LRP4
chr11	46743246	46743247	rs3136441	Teslovich TM	2010-08-05	Biological, clinical and population relevance of 95 loci for blood lipids.	HDL cholesterol	99,900 European ancestry individuals	NA	11p11.2	LRP4, NR1H3
chr11	46744368	46744369	rs3136448	Vuckovic D	2020-09-01	The Polygenic and Monogenic Basis of Blood Traits and Diseases.	Monocyte count	408,112 British individuals	NA	11p11.2	F2
chr11	46744368	46744369	rs3136448	Vuckovic D	2020-09-01	The Polygenic and Monogenic Basis of Blood Traits and Diseases.	Lymphocyte counts	408,112 British individuals	NA	11p11.2	F2
chr11	46745002	46745003	rs5896	Gao XR	2018-03-28	Genome-Wide Association Analyses Identify New Loci Influencing Intraocular Pressure.	Intraocular pressure	115,486 European ancestry individuals	NA	11p11.2	F2
chr11	46747661	46747662	rs5899	Emilsson V	2018-08-02	Co-regulatory networks of human serum proteins link genetics to disease.	Blood protein levels	3,200 European ancestry individuals	NA	11p11.2	ARHGAP1	(ARHGAP1, 11955_1_3)
chr11	46755387	46755388	rs61884307	Anney RJL	2017-05-22	Meta-analysis of GWAS of over 16,000 individuals with autism spectrum disorder highlights a novel locus at 10q24.32 and a significant overlap with schizophrenia.	Autism spectrum disorder or schizophrenia	schizophrenia cases and controls (see Ripke, 2014), up to 6,197 European ancestry ASD cases, up to 7,377 European ancestry controls, up to 1,190 ASD cases, up to 1,190 controls	NA	11p11.2	ACP2, AMBRA1, ARFGAP2, ARHGAP1, ATG13, C11orf49, CHRM4, CKAP5, CREB3L1, DDB2, DGKZ, F2, HARBI1, LOC101928943, LRP4, LRP4-AS1, MADD, MDK, MIR3160-1, MIR3160-2, MIR4688, MIR5582, MIR6745, MYBPC3, NR1H3, PACSIN3, SNORD67, ZNF408
chr11	46760755	46760756	rs3136516	Lindstrom S	2019-08-16	Genomic and Transcriptomic Association Studies Identify 16 Novel Susceptibility Loci for Venous Thromboembolism.	Venous thromboembolism	29,435 European ancestry cases, 799 African American cases, 157,769 European ancestry controls, 14,353 African American controls	NA	11p11.2	F2
chr11	46760755	46760756	rs3136516	Klarin D	2017-04-01	Genetic Analysis of Venous Thromboembolism in UK Biobank Identifies the ZFPM2 Locus and Implicates Obesity as a Causal Risk Factor.	Venous thromboembolism	3,290 European ancestry cases, 116,868 European ancestry controls	65,734 cases and controls (see Germain, 2015)	11p11.2	F2	(Conditioned on rs1799963)
chr11	46761054	46761055	rs1799963	Klarin D	2019-11-01	Genome-wide association analysis of venous thromboembolism identifies new risk loci and genetic overlap with arterial vascular disease.	Venous thromboembolism	23,151 European ancestry cases, 553,439 European ancestry controls, 2,261 African American cases, 49,400 African American controls, 654 Hispanic cases, 21,214 Hispanic controls	17,672 cases, 167,295 controls	11p11.2	F2
chr11	46761054	46761055	rs1799963	Lindstrom S	2019-08-16	Genomic and Transcriptomic Association Studies Identify 16 Novel Susceptibility Loci for Venous Thromboembolism.	Venous thromboembolism	29,435 European ancestry cases, 157,769 European ancestry controls	NA	11p11.2	NR
chr11	46761054	46761055	rs1799963	Klarin D	2017-04-01	Genetic Analysis of Venous Thromboembolism in UK Biobank Identifies the ZFPM2 Locus and Implicates Obesity as a Causal Risk Factor.	Venous thromboembolism	3,290 European ancestry cases, 116,868 European ancestry controls	65,734 cases and controls (see Germain, 2015)	11p11.2	F2
chr11	46761054	46761055	rs1799963	Hinds DA	2016-02-09	Genome-wide association analysis of self-reported events in 6135 individuals and 252 827 controls identifies 8 loci associated with thrombosis.	Thrombosis	6,135 European ancestry cases, 252,827 European ancestry controls	NA	11p11.2	F2
chr11	46761054	46761055	rs1799963	Germain M	2015-03-12	Meta-analysis of 65,734 individuals identifies TSPAN15 and SLC44A2 as two susceptibility loci for venous thromboembolism.	Venous thromboembolism	7,507 European ancestry cases, 52,632 European ancestry controls	3,009 European ancestry cases, 2,586 European ancestry controls	11p11.2	F2
chr11	46766889	46766890	rs61884327	Medina-Gomez C	2018-01-04	Life-Course Genome-wide Association Study Meta-analysis of Total Body BMD and Assessment of Age-Specific Effects.	Total body bone mineral density	56,284 European ancestry individuals, up to 1,333 African American individuals, up to 9,328 admixed individuals	NA	11p11.2	NR
chr11	46781413	46781414	rs150058248	Zhu Z	2019-10-24	Shared Genetic and Experimental Links between Obesity-Related Traits and Asthma Subtypes in UK Biobank.	Body mass index	457,822 European ancestry individuals	NA	11p11.2	NR
chr11	46783434	46783435	rs61884328	Medina-Gomez C	2018-01-04	Life-Course Genome-wide Association Study Meta-analysis of Total Body BMD and Assessment of Age-Specific Effects.	Total body bone mineral density (age over 60)	22,504 European ancestry and African American individuals	NA	11p11.2	NR
chr11	46788690	46788691	rs4534535	Giri A	2018-12-21	Trans-ethnic association study of blood pressure determinants in over 750,000 individuals.	Pulse pressure	365,998 European ancestry individuals, 63,490 African ancestry individuals, 22,802 Hispanic individuals, 4,792 Asian ancestry individuals, 2,695 Native American ancestry individuals	299,024 European ancestry individuals, 17,277 individuals	11p11.2	CKAP5
chr11	46804760	46804761	rs11038990	Kunkle BW	2019-02-28	Genetic meta-analysis of diagnosed Alzheimer's disease identifies new risk loci and implicates A?, tau, immunity and lipid processing.	Alzheimer's disease (late onset)	21,982 European ancestry cases, 41,944 European ancestry controls	up to 13,292 European ancestry cases, up to 17,219 European ancestry controls	11p11.2	MIR5582, F2, CKAP5
chr11	46805574	46805575	rs7941964	Han X	2020-04-30	Association of Myopia and Intraocular Pressure With Retinal Detachment in European Descent Participants of the UK Biobank Cohort: A Mendelian Randomization Study.	Intraocular pressure	101,939 European ancestry cases	NA	11p11.2	NR
chr11	46849359	46849360	rs1007738	Styrkarsdottir U	2008-12-14	New sequence variants associated with bone mineral density.	Bone mineral density (hip)	6,865 European ancestry individuals	8,510 European ancestry individuals	11p11.2	LRP4
chr11	46856535	46856536	rs10838622	Medina-Gomez C	2018-01-04	Life-Course Genome-wide Association Study Meta-analysis of Total Body BMD and Assessment of Age-Specific Effects.	Total body bone mineral density	56,284 European ancestry individuals, up to 1,333 African American individuals, up to 9,328 admixed individuals	NA	11p11.2	NR	(European)
chr11	46880591	46880592	rs149082597	Morris JA	2018-12-31	An atlas of genetic influences on osteoporosis in humans and mice.	Heel bone mineral density	426,824 British ancestry individuals	NA	11p11.2	LRP4-AS1
chr11	46884712	46884713	rs1585453	Evangelou E	2018-09-17	Genetic analysis of over 1 million people identifies 535 new loci associated with blood pressure traits.	Systolic blood pressure	757,601 European ancestry individuals	249,262 European ancestry individuals	11p11.2	LRP4
chr11	46893107	46893108	rs2306029	Smith NL	2011-04-21	Genetic predictors of fibrin D-dimer levels in healthy adults.	D-dimer levels	21,052 European ancestry individuals	NA	11p11.2	LRP4
chr11	46897252	46897253	rs2306032	Medina-Gomez C	2018-01-04	Life-Course Genome-wide Association Study Meta-analysis of Total Body BMD and Assessment of Age-Specific Effects.	Total body bone mineral density	56,284 European ancestry individuals, up to 1,333 African American individuals, up to 9,328 admixed individuals	NA	11p11.2	NR
chr11	46898770	46898771	rs6485702	Morris JA	2018-12-31	An atlas of genetic influences on osteoporosis in humans and mice.	Heel bone mineral density	426,824 British ancestry individuals	NA	11p11.2	LRP4
chr11	46906844	46906845	rs10838629	Baselmans BML	2019-01-14	Multivariate genome-wide analyses of the well-being spectrum.	Well-being spectrum (multivariate analysis)	2,083,151 European ancestry individuals	287,239 European ancestry individuals	11p11.2	NR
chr11	46906844	46906845	rs10838629	Baselmans BML	2019-01-14	Multivariate genome-wide analyses of the well-being spectrum.	Positive affect	410,603 European ancestry individuals	NA	11p11.2	NR
chr11	46906844	46906845	rs10838629	Baselmans BML	2019-01-14	Multivariate genome-wide analyses of the well-being spectrum.	Neuroticism	523,783 European ancestry individuals	59,206 European ancestry individuals	11p11.2	NR
chr11	46906844	46906845	rs10838629	Baselmans BML	2019-01-14	Multivariate genome-wide analyses of the well-being spectrum.	Depressive symptoms	1,067,913 European ancestry individuals	228,033 European ancestry individuals	11p11.2	NR
chr11	46907826	46907827	rs2306027	Tin A	2019-10-02	Target genes, variants, tissues and transcriptional pathways influencing human serum urate levels.	Urate levels	288,649 European ancestry individuals, 125,725 East Asian ancestry individuals, 33,671 African American individuals, 9,037 South Asian ancestry individuals, 608 Hispanic individuals	NA	11p11.2	LRP4	(AA)
chr11	46908729	46908730	rs7118404	Kichaev G	2018-12-27	Leveraging Polygenic Functional Enrichment to Improve GWAS Power.	Heel bone mineral density	approximately 446,000 European ancestry individuals	NA	11p11.2
chr11	46924664	46924665	rs12806687	Karlsson Linner R	2019-01-14	Genome-wide association analyses of risk tolerance and risky behaviors in over 1 million individuals identify hundreds of loci and shared genetic influences.	General risk tolerance (MTAG)	975,353 European ancestry individuals	NA	11p11.2	LRP4
chr11	46924664	46924665	rs12806687	Kim SK	2018-07-26	Identification of 613 new loci associated with heel bone mineral density and a polygenic risk score for bone mineral density, osteoporosis and fracture.	Heel bone mineral density	394,929 European ancestry individuals	NA	11p11.2
chr11	46924664	46924665	rs12806687	Kemp JP	2017-09-04	Identification of 153 new loci associated with heel bone mineral density and functional involvement of GPC6 in osteoporosis.	Heel bone mineral density	76,067 European ancestry women, 66,420 European ancestry men	NA	11p11.2	LRP4	(women)
chr11	46924664	46924665	rs12806687	Kemp JP	2017-09-04	Identification of 153 new loci associated with heel bone mineral density and functional involvement of GPC6 in osteoporosis.	Heel bone mineral density	76,067 European ancestry women, 66,420 European ancestry men	NA	11p11.2	LRP4
chr11	46924664	46924665	rs12806687	Kemp JP	2017-09-04	Identification of 153 new loci associated with heel bone mineral density and functional involvement of GPC6 in osteoporosis.	Heel bone mineral density	76,067 European ancestry women, 66,420 European ancestry men	NA	11p11.2	LRP4	(men)
chr11	46929953	46929954	rs10838634	Goes FS	2015-07-21	Genome-wide association study of schizophrenia in Ashkenazi Jews.	Schizophrenia	592 Ashkenazi Jewish ancestry cases, 505 Ashkenazi Jewish ancestry controls, 36,989 cases, 113,075 controls	NA	11p11.2	NR
chr11	46933310	46933311	rs191945075	Lindstrom S	2019-08-16	Genomic and Transcriptomic Association Studies Identify 16 Novel Susceptibility Loci for Venous Thromboembolism.	Venous thromboembolism	29,435 European ancestry cases, 799 African American cases, 157,769 European ancestry controls, 14,353 African American controls	NA	11p11.2	LRP4, F2
chr11	46933310	46933311	rs191945075	Lindstrom S	2019-08-16	Genomic and Transcriptomic Association Studies Identify 16 Novel Susceptibility Loci for Venous Thromboembolism.	Venous thromboembolism	29,435 European ancestry cases, 157,769 European ancestry controls	NA	11p11.2	NR
chr11	46935184	46935185	rs9667108	Davies G	2018-05-29	Study of 300,486 individuals identifies 148 independent genetic loci influencing general cognitive function.	Reaction time	330,069 European ancestry individuals	NA	11p11.2	LRP4
chr11	46939026	46939027	rs7940441	Nagel M	2018-06-25	Meta-analysis of genome-wide association studies for neuroticism in 449,484 individuals identifies novel genetic loci and pathways.	Neuroticism	449,484 European ancestry individuals	NA	11p11.2	NR
chr11	46940292	46940293	rs78245588	Ekenberg C	2019-06-13	Single nucleotide polymorphisms in HLA alleles are associated with HIV-1 viral load in demographically diverse, ART-naive participants from the START trial.	Pre-treatment viral load in HIV-1 infection	1,398 European ancestry individuals, 572 Black individuals, 418 Hispanic individuals, 13 Asian ancestry individuals, 39 individuals	NA	11p11.2	LRP4
chr11	46945226	46945227	rs10838635	Nagel M	2018-03-02	Item-level analyses reveal genetic heterogeneity in neuroticism.	Feeling fed-up	374,971 European ancestry individuals	NA	11p11.2	HARBI1
chr11	46949600	46949601	rs78744550	Gao XR	2018-03-28	Genome-Wide Association Analyses Identify New Loci Influencing Intraocular Pressure.	Intraocular pressure	115,486 European ancestry individuals	NA	11p11.2	LRP4, C11orf49
chr11	46966807	46966808	rs2903517	Demange PA	2021-01-07	Investigating the genetic architecture of noncognitive skills using GWAS-by-subtraction.	Noncognitive aspects of educational attainment	510,795 European ancestry individuals	NA	11p11.2	NR
chr11	46991807	46991808	rs112192770	Richardson TG	2020-03-23	Evaluating the relationship between circulating lipoprotein lipids and apolipoproteins with risk of coronary heart disease: A multivariable Mendelian randomisation analysis.	HDL cholesterol levels	403,943 European ancestry individuals	NA	11p11.2	C11orf49
chr11	47046553	47046554	rs7128325	Nagel M	2018-06-25	Meta-analysis of genome-wide association studies for neuroticism in 449,484 individuals identifies novel genetic loci and pathways.	Depressed affect	357,957 European ancestry individuals	NA	11p11.2	NR
chr11	47046553	47046554	rs7128325	Nagel M	2018-03-02	Item-level analyses reveal genetic heterogeneity in neuroticism.	Feeling miserable	376,097 European ancestry individuals	NA	11p11.2	MDK
chr11	47087127	47087128	rs7118546	Medina-Gomez C	2018-01-04	Life-Course Genome-wide Association Study Meta-analysis of Total Body BMD and Assessment of Age-Specific Effects.	Total body bone mineral density	56,284 European ancestry individuals, up to 1,333 African American individuals, up to 9,328 admixed individuals	NA	11p11.2	NR	(European)
chr11	47109497	47109498	rs149639773	Lindstrom S	2019-08-16	Genomic and Transcriptomic Association Studies Identify 16 Novel Susceptibility Loci for Venous Thromboembolism.	Venous thromboembolism	29,435 European ancestry cases, 157,769 European ancestry controls	NA	11p11.2	NR
chr11	47110591	47110592	rs60201196	Medina-Gomez C	2018-01-04	Life-Course Genome-wide Association Study Meta-analysis of Total Body BMD and Assessment of Age-Specific Effects.	Total body bone mineral density	56,284 European ancestry individuals, up to 1,333 African American individuals, up to 9,328 admixed individuals	NA	11p11.2	NR
chr11	47119874	47119875	rs3885274	Kim SK	2018-07-26	Identification of 613 new loci associated with heel bone mineral density and a polygenic risk score for bone mineral density, osteoporosis and fracture.	Heel bone mineral density	394,929 European ancestry individuals	NA	11p11.2
chr11	47124950	47124950	rs35518693	Kim SK	2018-07-26	Identification of 613 new loci associated with heel bone mineral density and a polygenic risk score for bone mineral density, osteoporosis and fracture.	Heel bone mineral density	394,929 European ancestry individuals	NA	11p11.2
chr11	47127152	47127153	rs7117404	Smith NL	2011-04-21	Genetic predictors of fibrin D-dimer levels in healthy adults.	D-dimer levels	21,052 European ancestry individuals	NA	11p11.2	C11orf49
chr11	47129396	47129397	rs12417519	Nagel M	2018-03-02	Item-level analyses reveal genetic heterogeneity in neuroticism.	Feeling fed-up	374,971 European ancestry individuals	NA	11p11.2	NR
chr11	47176004	47176005	rs747650	He L	2014-01-07	Two new susceptibility loci 1q24.2 and 11p11.2 confer risk to severe acne.	Acne (severe)	1,031 Han Chinese ancestry cases, 1,031 Han Chinese ancestry controls	1,860 Han Chinese ancestry cases, 3,660 Han Chinese ancestry controls	11p11.2	DDB2	(fixed effect model)
chr11	47183426	47183427	rs117749721	Kichaev G	2018-12-27	Leveraging Polygenic Functional Enrichment to Improve GWAS Power.	Body mass index	approximately 458,000 European ancestry individuals	NA	11p11.2
chr11	47183689	47183690	rs78112569	Zhu Z	2019-10-24	Shared Genetic and Experimental Links between Obesity-Related Traits and Asthma Subtypes in UK Biobank.	Body mass index	457,822 European ancestry individuals	NA	11p11.2	NR
chr11	47186423	47186424	rs1055447	Hill WD	2019-03-13	Genetic contributions to two special factors of neuroticism are associated with affluence, higher intelligence, better health, and longer life.	General factor of neuroticism	270,059 British ancestry individuals	NA	11p11.2	ARFGAP2
chr11	47186423	47186424	rs1055447	Nagel M	2018-06-25	Meta-analysis of genome-wide association studies for neuroticism in 449,484 individuals identifies novel genetic loci and pathways.	Depressed affect	357,957 European ancestry individuals	NA	11p11.2	NR
chr11	47191237	47191238	rs2867972	Nagel M	2018-06-25	Meta-analysis of genome-wide association studies for neuroticism in 449,484 individuals identifies novel genetic loci and pathways.	Depressed affect	357,957 European ancestry individuals	NA	11p11.2	NR
chr11	47198637	47198638	rs61897848	Davies G	2018-05-29	Study of 300,486 individuals identifies 148 independent genetic loci influencing general cognitive function.	Reaction time	330,069 European ancestry individuals	NA	11p11.2	NR
chr11	47204847	47204848	rs77675579	He B	2020-08-10	Genome-wide pQTL analysis of protein expression regulatory networks in the human liver.	Protein quantitative trait loci (liver)	172 European ancestry individuals, 29 Black individuals, 86 individuals	NA	11p11.2	NR	(CIITA)
chr11	47204847	47204848	rs77675579	Kichaev G	2018-12-27	Leveraging Polygenic Functional Enrichment to Improve GWAS Power.	Educational attainment (years of education)	approximately 455,000 European ancestry individuals	NA	11p11.2
chr11	47211785	47211786	rs184907858	Medina-Gomez C	2018-01-04	Life-Course Genome-wide Association Study Meta-analysis of Total Body BMD and Assessment of Age-Specific Effects.	Total body bone mineral density	56,284 European ancestry individuals, up to 1,333 African American individuals, up to 9,328 admixed individuals	NA	11p11.2	NR
chr11	47219309	47219310	rs10769248	Hill WD	2019-03-13	Genetic contributions to two special factors of neuroticism are associated with affluence, higher intelligence, better health, and longer life.	General factor of neuroticism	270,059 British ancestry individuals	NA	11p11.2	ENSG00000243802
chr11	47220777	47220778	rs182879407	Lindstrom S	2019-08-16	Genomic and Transcriptomic Association Studies Identify 16 Novel Susceptibility Loci for Venous Thromboembolism.	Venous thromboembolism	29,435 European ancestry cases, 157,769 European ancestry controls	NA	11p11.2	NR
chr11	47225995	47225996	rs17197710	Wen W	2016-01-20	Genome-wide association studies in East Asians identify new loci for waist-hip ratio and waist circumference.	Waist-to-hip ratio adjusted for body mass index	up to 39,869 East Asian individuals	up to 20,137 East Asian individuals, up to 209,947 individuals	11p11.2	PACSIN3	(East Asian)
chr11	47232037	47232038	rs11039131	Goes FS	2015-07-21	Genome-wide association study of schizophrenia in Ashkenazi Jews.	Schizophrenia	592 Ashkenazi Jewish ancestry cases, 505 Ashkenazi Jewish ancestry controls, 36,989 cases, 113,075 controls	NA	11p11.2	NR
chr11	47235732	47235732	rs11444403	Kim SK	2018-07-26	Identification of 613 new loci associated with heel bone mineral density and a polygenic risk score for bone mineral density, osteoporosis and fracture.	Heel bone mineral density	394,929 European ancestry individuals	NA	11p11.2
chr11	47236293	47236294	rs3758666	Nagel M	2018-03-02	Item-level analyses reveal genetic heterogeneity in neuroticism.	Feeling fed-up	374,971 European ancestry individuals	NA	11p11.2	NR
chr11	47236297	47236298	rs3758667	Nagel M	2018-06-25	Meta-analysis of genome-wide association studies for neuroticism in 449,484 individuals identifies novel genetic loci and pathways.	Depressed affect	357,957 European ancestry individuals	NA	11p11.2	NR
chr11	47237679	47237680	rs2291120	Kichaev G	2018-12-27	Leveraging Polygenic Functional Enrichment to Improve GWAS Power.	Hair color	approximately 452,000 European ancestry individuals	NA	11p11.2
chr11	47246396	47246397	rs7395581	Nielsen JB	2020-12-18	Loss-of-function genomic variants highlight potential therapeutic targets for cardiovascular disease.	High density lipoprotein cholesterol levels	76,081 European ancestry individuals, 127,395 Japanese ancestry individuals	NA	11p11.2	DDB2
chr11	47246396	47246397	rs7395581	Hoffmann TJ	2018-03-05	A large electronic-health-record-based genome-wide study of serum lipids.	High density lipoprotein cholesterol levels	76,627 European ancestry individuals, 7,795 Hispanic individuals, 6,855 East Asian ancestry individuals, 2,958 African American individuals, 439 South Asian ancestry individuals	NA	11p11.2	NR
chr11	47246396	47246397	rs7395581	Hoffmann TJ	2018-03-05	A large electronic-health-record-based genome-wide study of serum lipids.	High density lipoprotein cholesterol levels	76,627 European ancestry individuals, 7,795 Hispanic individuals, 6,855 East Asian ancestry individuals, 2,958 African American individuals, 439 South Asian ancestry individuals	NA	11p11.2	NR	(EA)
chr11	47246396	47246397	rs7395581	Surakka I	2015-05-11	The impact of low-frequency and rare variants on lipid levels.	HDL cholesterol	up to 62,166 European ancestry individuals	NA	11p11.2	MADD
chr11	47252106	47252107	rs4647728	Medina-Gomez C	2018-01-04	Life-Course Genome-wide Association Study Meta-analysis of Total Body BMD and Assessment of Age-Specific Effects.	Total body bone mineral density	56,284 European ancestry individuals, up to 1,333 African American individuals, up to 9,328 admixed individuals	NA	11p11.2	NR	(European)
chr11	47254036	47254036	rs752976285	Vuckovic D	2020-09-01	The Polygenic and Monogenic Basis of Blood Traits and Diseases.	Monocyte percentage of white cells	408,112 British individuals	NA	11p11.2	DDB2
chr11	47254036	47254036	rs752976285	Chen MH	2020-09-01	Trans-ethnic and Ancestry-Specific Blood-Cell Genetics in 746,667 Individuals from 5 Global Populations.	Monocyte count	521,594 European ancestry individuals	NA	11p11.2	NR
chr11	47255316	47255317	rs3781619	Vuckovic D	2020-09-01	The Polygenic and Monogenic Basis of Blood Traits and Diseases.	Lymphocyte percentage of white cells	408,112 British individuals	NA	11p11.2	DDB2
chr11	47259667	47259668	rs326222	Richardson TG	2020-03-23	Evaluating the relationship between circulating lipoprotein lipids and apolipoproteins with risk of coronary heart disease: A multivariable Mendelian randomisation analysis.	Triglyceride levels	441,016 European ancestry individuals	NA	11p11.2	DDB2
chr11	47259667	47259668	rs326222	Kilpelainen TO	2019-01-22	Multi-ancestry study of blood lipid levels identifies four loci interacting with physical activity.	HDL cholesterol x physical activity interaction (2df test)	7,395 African American inactive individuals, 13,092 African American active individuals, 2,753 Asian ancestry inactive individuals, 3,650 Asian ancestry active individuals, 22,963 European ancestry inactive individuals, 61,939 European ancestry active individuals, 2,829 Hispanic or Latin American inactive individuals, 6,358 Hispanic or Latin American active individuals	1,886 African American inactive individuals, 1,892 African American active individuals, 1,217 South African Black ancestry inactive individuals, 389 South African Black ancestry active individuals, 2,494 East Asian ancestry inactive individuals, 1,947 East Asian ancestry active individuals, 724 South Asian ancestry inactive individuals, 1,425 South Asian ancestry active individuals, 41,042 Europe…	11p11.2	NR
chr11	47259727	47259728	rs143049891	Ruth KS	2020-02-10	Using human genetics to understand the disease impacts of testosterone in men and women.	Sex hormone-binding globulin levels adjusted for BMI	368,929 European ancestry individuals	NA	11p11.2	NR
chr11	47259727	47259728	rs143049891	Ruth KS	2020-02-10	Using human genetics to understand the disease impacts of testosterone in men and women.	Sex hormone-binding globulin levels	370,125 European ancestry individuals	NA	11p11.2	NR
chr11	47260318	47260319	rs901746	Noordam R	2019-11-12	Multi-ancestry sleep-by-SNP interaction analysis in 126,926 individuals reveals lipid loci stratified by sleep duration.	HDL cholesterol levels x short total sleep time interaction (2df test)	3,007 African American short sleepers, 369 Chinese ancestry short sleepers, 114 Asian ancestry short sleepers, at least 8,474 European ancestry short sleepers, 1,082 Hispanic/Latino short sleepers, up to 11,901 African American controls, 1,444 Chinese ancestry controls, 452 Asian ancestry controls, at least 31,567 European ancestry controls, 4,047 Hispanic/Latino controls	up to 221 African American short sleepers, 629 East Asian ancestry short sleepers, up to 9,585 European ancestry short sleepers, 2,517 Hispanic short sleepers, at least 925 African American controls, 2,504 East Asian ancestry controls, up to 38,027 European ancestry controls, 10,061 Hispanic controls	11p11.2	MADD
chr11	47260318	47260319	rs901746	Noordam R	2019-11-12	Multi-ancestry sleep-by-SNP interaction analysis in 126,926 individuals reveals lipid loci stratified by sleep duration.	HDL cholesterol levels x long total sleep time interaction (2df test)	2,933 African American long sleepers, 364 Chinese ancestry long sleepers, 112 Asian ancestry long sleepers, up to 7,870 European ancestry long sleepers, 1,038 Hispanic/Latino long sleepers, up to 11,975 African American controls, 1,449 Chinese ancestry controls, 454 Asian ancestry controls, at least 32,171 European ancestry controls, 4,091 Hispanic/Latino controls	at least 217 African American long sleepers, 616 East Asian ancestry long sleepers, up to 9,486 European ancestry long sleepers, 2,515 Hispanic long sleepers, at least 929 African American controls, 2,517 East Asian ancestry controls, up to 38,126 European ancestry controls, 10,063 Hispanic controls	11p11.2	MADD
chr11	47266470	47266471	rs75393320	Klarin D	2018-10-01	Genetics of blood lipids among ~300,000 multi-ethnic participants of the Million Veteran Program.	HDL cholesterol	215,551 European ancestry individuals, 57,332 African American individuals, 24,743 Hispanic individuals	Up to 319,677 individuals	11p11.2	ACP2
chr11	47275063	47275064	rs10838681	Ripatti P	2020-03-10	Polygenic Hyperlipidemias and Coronary Artery Disease Risk.	Triglyceride levels	324,694 British ancestry individuals	NA	11p11.2	NR1H3
chr11	47275063	47275064	rs10838681	Wojcik GL	2019-06-19	Genetic analyses of diverse populations improves discovery for complex traits.	High density lipoprotein cholesterol levels	10,085 African American individuals, 17,751 Hispanic/Latino individuals, 2,378 Asian ancestry individuals, 1,912 Native Hawaiian ancestry individuals, 604 Native American ancestry individuals, 333 individuals	NA	11p11.2	NR
chr11	47275063	47275064	rs10838681	Khawaja AP	2018-05-21	Genome-wide analyses identify 68 new loci associated with intraocular pressure and improve risk prediction for primary open-angle glaucoma.	Intraocular pressure	139,555 European ancestry individuals	NA	11p11.2	NR1H3
chr11	47275063	47275064	rs10838681	Hoffmann TJ	2018-03-05	A large electronic-health-record-based genome-wide study of serum lipids.	High density lipoprotein cholesterol levels	76,627 European ancestry individuals, 7,795 Hispanic individuals, 6,855 East Asian ancestry individuals, 2,958 African American individuals, 439 South Asian ancestry individuals	NA	11p11.2	NR
chr11	47275063	47275064	rs10838681	Hoffmann TJ	2018-03-05	A large electronic-health-record-based genome-wide study of serum lipids.	High density lipoprotein cholesterol levels	76,627 European ancestry individuals, 7,795 Hispanic individuals, 6,855 East Asian ancestry individuals, 2,958 African American individuals, 439 South Asian ancestry individuals	NA	11p11.2	NR	(EA)
chr11	47275063	47275064	rs10838681	Kristiansson K	2012-03-07	Genome-wide screen for metabolic syndrome susceptibility Loci reveals strong lipid gene contribution but no evidence for common genetic basis for clustering of metabolic syndrome traits.	Metabolic syndrome	2,637 European ancestry cases, 7,927 European ancestry controls	NA	11p11.2	NR1H3	(HDL)
chr11	47276674	47276675	rs11039149	Lind L	2020-01-13	Genetic Determinants of Clustering of Cardiometabolic Risk Factors in U.K. Biobank.	Systolic blood pressure	291,107 British ancestry individuals	NA	11p11.2	NR1H3
chr11	47276674	47276675	rs11039149	Lind L	2020-01-13	Genetic Determinants of Clustering of Cardiometabolic Risk Factors in U.K. Biobank.	Blood glucose levels	291,107 British ancestry individuals	NA	11p11.2	NR1H3
chr11	47276674	47276675	rs11039149	German CA	2019-12-26	Ordered multinomial regression for genetic association analysis of ordinal phenotypes at Biobank scale.	Hypertension	30,822 British ancestry normal blood pressure individuals, 25,242 British ancestry elevated blood pressure individuals, 50,461 British ancestry stage 1 hypertension individuals, 75,286 British ancestry stage 2 hypertension individuals, 3,754 British ancestry hypertension crisis individuals	NA	11p11.2	NR1H3
chr11	47276674	47276675	rs11039149	Nagel M	2018-06-25	Meta-analysis of genome-wide association studies for neuroticism in 449,484 individuals identifies novel genetic loci and pathways.	Depressed affect	357,957 European ancestry individuals	NA	11p11.2	NR
chr11	47276674	47276675	rs11039149	Nagel M	2018-03-02	Item-level analyses reveal genetic heterogeneity in neuroticism.	Feeling miserable	376,097 European ancestry individuals	NA	11p11.2	ARHGAP1
chr11	47276674	47276675	rs11039149	Nagel M	2018-03-02	Item-level analyses reveal genetic heterogeneity in neuroticism.	Experiencing mood swings	373,733 European ancestry individuals	NA	11p11.2	ARHGAP1
chr11	47282023	47282024	rs2279238	Kanai M	2018-02-05	Genetic analysis of quantitative traits in the Japanese population links cell types to complex human diseases.	Creatinine levels	142,097 Japanese ancestry individuals	NA	11p11.2	NR1H3
chr11	47284302	47284314	rs6144337	Astle WJ	2016-11-17	The Allelic Landscape of Human Blood Cell Trait Variation and Links to Common Complex Disease.	Lymphocyte percentage of white cells	171,748 European ancestry individuals	NA	11p11.2	NR1H3
chr11	47286289	47286290	rs7120118	Wojcik GL	2019-06-19	Genetic analyses of diverse populations improves discovery for complex traits.	High density lipoprotein cholesterol levels	10,085 African American individuals, 17,751 Hispanic/Latino individuals, 2,378 Asian ancestry individuals, 1,912 Native Hawaiian ancestry individuals, 604 Native American ancestry individuals, 333 individuals	NA	11p11.2	NR
chr11	47286289	47286290	rs7120118	Klarin D	2018-10-01	Genetics of blood lipids among ~300,000 multi-ethnic participants of the Million Veteran Program.	Triglycerides	215,551 European ancestry individuals, 57,332 African American individuals, 24,743 Hispanic individuals	Up to 319,677 individuals	11p11.2	NR1H3
chr11	47286289	47286290	rs7120118	Sabatti C	2008-12-07	Genome-wide association analysis of metabolic traits in a birth cohort from a founder population.	HDL cholesterol	4,763 Northern Finnish founder individuals	NA	11p11.2	NR1H3
chr11	47293798	47293799	rs10501320	Zhu Z	2019-02-25	Shared genetic architecture between metabolic traits and Alzheimer's disease: a large-scale genome-wide cross-trait analysis.	Alzheimer's disease or fasting glucose levels (pleiotropy)	54,162 European ancestry cases, 58,047 European ancestry individuals	NA	11p11.2	ACP2, AGBL2, AMBRA1, ARFGAP2, ARHGAP1, ATG13, C1QTNF4, C11orf49, CELF1, CHRM4, CKAP5, CREB3L1, DDB2, DGKZ, F2, FAM180B, FNBP4, HARBI1, KBTBD4, LRP4, LRP4-AS1, MADD, MDK, MIR3160-1, MIR3160-2, MIR4688, MIR5582, MIR6745, MTCH2, MYBPC3, NDUFS3, NR1H3, NUP160, PACSIN3, PSMC3, PTPMT1, PTPRJ, RAPSN, SLC39A13, SNORD67, SPI1, ZNF408
chr11	47293798	47293799	rs10501320	Nagel M	2018-06-25	Meta-analysis of genome-wide association studies for neuroticism in 449,484 individuals identifies novel genetic loci and pathways.	Worry	348,219 European ancestry individuals	NA	11p11.2	NR
chr11	47293798	47293799	rs10501320	Nagel M	2018-03-02	Item-level analyses reveal genetic heterogeneity in neuroticism.	Suffering from nerves	369,499 European ancestry individuals	NA	11p11.2	ARHGAP1
chr11	47293798	47293799	rs10501320	Nagel M	2018-03-02	Item-level analyses reveal genetic heterogeneity in neuroticism.	Feeling nervous	373,121 European ancestry individuals	NA	11p11.2	ARHGAP1
chr11	47293798	47293799	rs10501320	Strawbridge RJ	2011-08-26	Genome-wide association identifies nine common variants associated with fasting proinsulin levels and provides new insights into the pathophysiology of type 2 diabetes.	Proinsulin levels	10,701 European ancestry individuals	16,378 European ancestry individuals	11p11.2	MADD
chr11	47298359	47298360	rs326214	Bentley AR	2019-03-29	Multi-ancestry genome-wide gene-smoking interaction study of 387,272 individuals identifies new loci associated with serum lipids.	HDL cholesterol levels	up to 23,761 African ancestry individuals, 13,171 Asian ancestry individuals, up to 90,272 European ancestry individuals, 6,620 Hispanic individuals	NA	11p11.2
chr11	47298359	47298360	rs326214	Spracklen CN	2017-02-21	Association analyses of East Asian individuals and trans-ancestry analyses with European individuals reveal new loci associated with cholesterol and triglyceride levels.	HDL cholesterol levels	34,930 East Asian ancestry individuals, 187,167 European ancestry individuals	8,741 Chinese ancestry individuals	11p11.2	LRP4	(Trans-ethnic initial)
chr11	47306584	47306585	rs1051006	Kulminski AM	2019-09-30	Quantitative and qualitative role of antagonistic heterogeneity in genetics of blood lipids.	High density lipoprotein cholesterol levels	29,902 European ancestry individuals	NA	11p11.2
chr11	47306584	47306585	rs1051006	Huyghe JR	2012-12-23	Exome array analysis identifies new loci and low-frequency variants influencing insulin processing and secretion.	Fasting blood proinsulin levels	up to 8,229 Finnish ancestry non-diabetic individuals	NA	11p11.2	MADD
chr11	47306629	47306630	rs35233100	Jones SE	2019-01-29	Genome-wide association analyses of chronotype in 697,828 individuals provides insights into circadian rhythms.	Chronotype	449,734 European ancestry individuals	248,098 European ancestry individuals	11p11.2	MADD
chr11	47306629	47306630	rs35233100	Huyghe JR	2012-12-23	Exome array analysis identifies new loci and low-frequency variants influencing insulin processing and secretion.	Fasting blood proinsulin levels	up to 8,229 Finnish ancestry non-diabetic individuals	NA	11p11.2	MADD
chr11	47311366	47311367	rs10838686	Hoffmann TJ	2018-03-05	A large electronic-health-record-based genome-wide study of serum lipids.	High density lipoprotein cholesterol levels	76,627 European ancestry individuals, 7,795 Hispanic individuals, 6,855 East Asian ancestry individuals, 2,958 African American individuals, 439 South Asian ancestry individuals	NA	11p11.2	NR
chr11	47311366	47311367	rs10838686	Hoffmann TJ	2018-03-05	A large electronic-health-record-based genome-wide study of serum lipids.	High density lipoprotein cholesterol levels	76,627 European ancestry individuals, 7,795 Hispanic individuals, 6,855 East Asian ancestry individuals, 2,958 African American individuals, 439 South Asian ancestry individuals	NA	11p11.2	NR	(EA)
chr11	47312891	47312892	rs10838687	Jones SE	2019-01-29	Genome-wide association analyses of chronotype in 697,828 individuals provides insights into circadian rhythms.	Chronotype	449,734 European ancestry individuals	248,098 European ancestry individuals	11p11.2	MADD
chr11	47312891	47312892	rs10838687	Ligthart S	2018-11-01	Genome Analyses of >200,000 Individuals Identify 58 Loci for Chronic Inflammation and Highlight Pathways that Link Inflammation and Complex Disorders.	C-reactive protein levels	up to 92,771 European ancestry males, up to 113,387 European ancestry females	NA	11p11.2	MADD
chr11	47312891	47312892	rs10838687	Strawbridge RJ	2011-08-26	Genome-wide association identifies nine common variants associated with fasting proinsulin levels and provides new insights into the pathophysiology of type 2 diabetes.	Proinsulin levels	10,701 European ancestry individuals	16,378 European ancestry individuals	11p11.2	MADD
chr11	47322494	47322494	rs138226373	Folkersen L	2020-10-16	Genomic and drug target evaluation of 90 cardiovascular proteins in 30,931 individuals.	Lectin-like oxidized LDL receptor 1 levels	21,758 European ancestry individuals	9,173 individuals	11p11.2
chr11	47324665	47324666	rs4752824	Hoffmann TJ	2018-03-05	A large electronic-health-record-based genome-wide study of serum lipids.	High density lipoprotein cholesterol levels	76,627 European ancestry individuals, 7,795 Hispanic individuals, 6,855 East Asian ancestry individuals, 2,958 African American individuals, 439 South Asian ancestry individuals	NA	11p11.2	NR
chr11	47324665	47324666	rs4752824	Hoffmann TJ	2018-03-05	A large electronic-health-record-based genome-wide study of serum lipids.	High density lipoprotein cholesterol levels	76,627 European ancestry individuals, 7,795 Hispanic individuals, 6,855 East Asian ancestry individuals, 2,958 African American individuals, 439 South Asian ancestry individuals	NA	11p11.2	NR	(EA)
chr11	47324861	47324862	rs4752978	Kichaev G	2018-12-27	Leveraging Polygenic Functional Enrichment to Improve GWAS Power.	Menarche (age at onset)	approximately 242,000 European ancestry individuals	NA	11p11.2
chr11	47334523	47334524	rs10838689	Lee JJ	2018-07-23	Gene discovery and polygenic prediction from a genome-wide association study of educational attainment in 1.1 million individuals.	Self-reported math ability	564,698 European ancestry individuals	NA	11p11.2	Intergenic
chr11	47336319	47336320	rs7944584	Wessel J	2015-01-29	Low-frequency and rare exome chip variants associate with fasting glucose and type 2 diabetes susceptibility.	Fasting blood glucose	50,900 European ancestry non-diabetic individuals, 9,664 African American non-diabetic individuals	NA	11p11.2	MADD
chr11	47336319	47336320	rs7944584	Huyghe JR	2012-12-23	Exome array analysis identifies new loci and low-frequency variants influencing insulin processing and secretion.	Fasting blood proinsulin levels	up to 8,229 Finnish ancestry non-diabetic individuals	NA	11p11.2	MADD
chr11	47336319	47336320	rs7944584	Manning AK	2012-05-13	A genome-wide approach accounting for body mass index identifies genetic variants influencing fasting glycemic traits and insulin resistance.	Fasting blood glucose (BMI interaction)	Up to 58,074 European ancestry individuals	Up tp 38,422 European ancestry individuals	11p11.2	MADD
chr11	47336319	47336320	rs7944584	Manning AK	2012-05-13	A genome-wide approach accounting for body mass index identifies genetic variants influencing fasting glycemic traits and insulin resistance.	Fasting blood glucose	Up to 58,074 European ancestry individuals	Up tp 38,422 European ancestry individuals	11p11.2	MADD
chr11	47336319	47336320	rs7944584	Dupuis J	2010-01-17	New genetic loci implicated in fasting glucose homeostasis and their impact on type 2 diabetes risk.	Fasting blood glucose	46,186 European ancestry individuals	76,558 European ancestry individuals	11p11.2	MADD
chr11	47336441	47336442	rs6485751	Jansen PR	2019-02-25	Genome-wide analysis of insomnia in 1,331,010 individuals identifies new risk loci and functional pathways.	Morningness	434,835 European ancestry individuals	NA	11p11.2
chr11	47338585	47338586	rs61897360	Vuckovic D	2020-09-01	The Polygenic and Monogenic Basis of Blood Traits and Diseases.	Monocyte percentage of white cells	408,112 British individuals	NA	11p11.2	MADD
chr11	47345099	47345100	rs10838692	Choquet H	2018-06-11	A multiethnic genome-wide association study of primary open-angle glaucoma identifies novel risk loci.	Glaucoma (primary open-angle)	10,523 European ancestry cases, 203,579 European ancestry controls, 411 Hispanic cases, 4,778 Hispanic controls, 463 East Asian ancestry cases, 4,907 East Asian ancestry controls, 298 African American cases, 1,549 African American controls, 204 South Asian ancestry cases, 4,916 South Asian ancestry controls, 272 African British cases, 4,831 African British controls, 144 mixed ancestry cases, 3,42…	NA	11p11.2	MADD
chr11	47345099	47345100	rs10838692	Hoffmann TJ	2018-03-05	A large electronic-health-record-based genome-wide study of serum lipids.	High density lipoprotein cholesterol levels	76,627 European ancestry individuals, 7,795 Hispanic individuals, 6,855 East Asian ancestry individuals, 2,958 African American individuals, 439 South Asian ancestry individuals	NA	11p11.2	NR
chr11	47345099	47345100	rs10838692	Hoffmann TJ	2018-03-05	A large electronic-health-record-based genome-wide study of serum lipids.	High density lipoprotein cholesterol levels	76,627 European ancestry individuals, 7,795 Hispanic individuals, 6,855 East Asian ancestry individuals, 2,958 African American individuals, 439 South Asian ancestry individuals	NA	11p11.2	NR	(EA)
chr11	47346722	47346723	rs11039182	Julienne H	2020-01-24	JASS: command line and web interface for the joint analysis of GWAS results.	Insulin-related traits (multivariate analysis)	62,205 individuals	NA	11p11.2	MADD
chr11	47346722	47346723	rs11039182	Masotti M	2019-04-25	Pleiotropy informed adaptive association test of multiple traits using GWAS summary data.	Glycemic traits (pleiotropy)	46,186 European ancestry individuals	NA	11p11.2	MADD
chr11	47346722	47346723	rs11039182	Hill WD	2019-03-13	Genetic contributions to two special factors of neuroticism are associated with affluence, higher intelligence, better health, and longer life.	General factor of neuroticism	270,059 British ancestry individuals	NA	11p11.2	MADD
chr11	47346722	47346723	rs11039182	Nagel M	2018-06-25	Meta-analysis of genome-wide association studies for neuroticism in 449,484 individuals identifies novel genetic loci and pathways.	Neuroticism	449,484 European ancestry individuals	NA	11p11.2	NR
chr11	47346722	47346723	rs11039182	Nagel M	2018-03-02	Item-level analyses reveal genetic heterogeneity in neuroticism.	Neurociticism	380,506 European ancestry individuals	NA	11p11.2	ARHGAP1
chr11	47346722	47346723	rs11039182	Pattaro C	2016-01-21	Genetic associations at 53 loci highlight cell types and biological pathways relevant for kidney function.	Chronic kidney disease	12,385 European ancestry cases, 104,780 European ancestry controls	33,972 European ancestry individuals	11p11.2	MADD
chr11	47346939	47346940	rs11039183	Michailidou K	2017-10-23	Association analysis identifies 65 new breast cancer risk loci.	Breast cancer	76,192 European ancestry cases, 63,082 European ancestry controls	46,785 European ancestry cases, 42,892 European ancestry controls, 14,068 East Asian ancestry cases, 13,104 East Asian ancestry controls	11p11.2	NR	(EA)
chr11	47349845	47349846	rs753992	Shah RL	2018-02-05	A genome-wide association study of corneal astigmatism: The CREAM Consortium.	Corneal astigmatism	9,293 European ancestry cases, 12,957 European ancestry controls, 4,349 Asian ancestry cases, 4,771 Asian ancestry controls	NA	11p11.2	MADD
chr11	47354786	47354787	rs1052373	Richardson TG	2020-03-23	Evaluating the relationship between circulating lipoprotein lipids and apolipoproteins with risk of coronary heart disease: A multivariable Mendelian randomisation analysis.	HDL cholesterol levels	403,943 European ancestry individuals	NA	11p11.2	MYBPC3
chr11	47354904	47354905	rs11570115	Zhu Z	2019-10-24	Shared Genetic and Experimental Links between Obesity-Related Traits and Asthma Subtypes in UK Biobank.	Body mass index	457,822 European ancestry individuals	NA	11p11.2	NR
chr11	47355474	47355475	rs11570112	Liu C	2019-10-25	Genome-Wide Association Studies for Cerebrospinal Fluid Soluble TREM2 in Alzheimer's Disease.	Cerebrospinal fluid sTREM-2 levels	224 healthy normal individuals, 72 significant memory concern individuals, 234 early mild cognitive impairment individuals, 277 late mild cognitive impairment individuals, 194 Alzheimer's disease cases	NA	11p11.2	NR
chr11	47356869	47356870	rs2301216	Kichaev G	2018-12-27	Leveraging Polygenic Functional Enrichment to Improve GWAS Power.	Systolic blood pressure	approximately 422,000 European ancestry individuals	NA	11p11.2
chr11	47357169	47357170	rs2254240	Giri A	2018-12-21	Trans-ethnic association study of blood pressure determinants in over 750,000 individuals.	Pulse pressure	365,998 European ancestry individuals, 63,490 African ancestry individuals, 22,802 Hispanic individuals, 4,792 Asian ancestry individuals, 2,695 Native American ancestry individuals	299,024 European ancestry individuals, 17,277 individuals	11p11.2	MYBPC3
chr11	47360411	47360412	rs2269434	Richardson TG	2020-03-23	Evaluating the relationship between circulating lipoprotein lipids and apolipoproteins with risk of coronary heart disease: A multivariable Mendelian randomisation analysis.	Apolipoprotein A1 levels	393,193 European ancestry individuals	NA	11p11.2	MYBPC3
chr11	47360411	47360412	rs2269434	Han X	2020-01-03	Using Mendelian randomization to evaluate the causal relationship between serum C-reactive protein levels and age-related macular degeneration.	C-reactive protein levels	418,642 British ancestry individuals	NA	11p11.2	NR
chr11	47360411	47360412	rs2269434	International Multiple Sclerosis Genetics Consortium	2019-09-01	Multiple sclerosis genomic map implicates peripheral immune cells and microglia in susceptibility.	Multiple sclerosis	14,802 European and unknown ancestry cases, 26,703 European and unknown ancestry controls	32,627 European and unknown ancestry cases, 41,672 European and unknown ancestry controls	11p11.2	MYBPC3
chr11	47361083	47361084	rs2856653	Wu Y	2019-04-23	Genome-wide association study of medication-use and associated disease in the UK Biobank.	Medication use (agents acting on the renin-angiotensin system)	62,752 European ancestry cases, 174,778 European ancestry controls	NA	11p11.2	MYBPC3
chr11	47361856	47361857	rs7928073	Lee JJ	2018-07-23	Gene discovery and polygenic prediction from a genome-wide association study of educational attainment in 1.1 million individuals.	Self-reported math ability (MTAG)	670,471 European ancestry individuals	NA	11p11.2	Intergenic	(MTAG)
chr11	47362464	47362465	rs10769254	de Vries PS	2019-01-29	Multi-Ancestry Genome-Wide Association Study of Lipid Levels Incorporating Gene-Alcohol Interactions.	Triglyceride levels x alcohol consumption (regular vs non-regular drinkers) interaction (2df)	44,831 European ancestry regular drinkers, 3,976 African American regular drinkers, 1,288 Asian ancestry regular drinkers, 827 Hispanic regular drinkers, 11,674 European ancestry non-regular drinkers, 5,894 African American non-regular drinkers, 1,203 Asian ancestry non-regular drinkers, 1,701 Hispanic non-regular drinkers	71,281 European ancestry regular drinkers, 711 African American or Afro-Caribbean regular drinkers, 35,088 Asian ancestry regular drinkers, 3,742 Hispanic regular drinkers, 36,267 European ancestry non-regular drinkers, 1,317 African American or Afro-Caribbean non-regular drinkers, 6,152 Asian ancestry non-regular drinkers, 2,880 Hispanic non-regular drinkers	11p11.2	MYBPC3	(EA)
chr11	47362464	47362465	rs10769254	de Vries PS	2019-01-29	Multi-Ancestry Genome-Wide Association Study of Lipid Levels Incorporating Gene-Alcohol Interactions.	Triglyceride levels x alcohol consumption (regular vs non-regular drinkers) interaction (2df)	44,831 European ancestry regular drinkers, 3,976 African American regular drinkers, 1,288 Asian ancestry regular drinkers, 827 Hispanic regular drinkers, 11,674 European ancestry non-regular drinkers, 5,894 African American non-regular drinkers, 1,203 Asian ancestry non-regular drinkers, 1,701 Hispanic non-regular drinkers	71,281 European ancestry regular drinkers, 711 African American or Afro-Caribbean regular drinkers, 35,088 Asian ancestry regular drinkers, 3,742 Hispanic regular drinkers, 36,267 European ancestry non-regular drinkers, 1,317 African American or Afro-Caribbean non-regular drinkers, 6,152 Asian ancestry non-regular drinkers, 2,880 Hispanic non-regular drinkers	11p11.2	MYBPC3
chr11	47362464	47362465	rs10769254	de Vries PS	2019-01-29	Multi-Ancestry Genome-Wide Association Study of Lipid Levels Incorporating Gene-Alcohol Interactions.	Triglyceride levels x alcohol consumption (drinkers vs non-drinkers) interaction (2df)	56,505 European ancestry current drinkers, 9,870 African American current drinkers, 2,491 Asian ancestry current drinkers, 2,528 Hispanic current drinkers, 33,388 European ancestry non-drinkers, 11,119 African American non-drinkers, 9,959 Asian ancestry non-drinkers, 1,466 Hispanic non-drinkers	107,548 European ancestry current drinkers, 2,028 African American or Afro-Caribbean current drinkers, 41,240 Asian ancestry current drinkers, 6,622 Hispanic individuals, 1,984 Brazilian ancestry individuals, 29,438 European ancestry non-drinkers, 2,447 African American or Afro-Caribbean non-drinkers, 67,191 Asian ancestry non-drinkers, 7,092 Hispanic non-drinkers, 1,668 Brazilian ancestry non-dr…	11p11.2	MYBPC3
chr11	47362464	47362465	rs10769254	de Vries PS	2019-01-29	Multi-Ancestry Genome-Wide Association Study of Lipid Levels Incorporating Gene-Alcohol Interactions.	Triglyceride levels x alcohol consumption (drinkers vs non-drinkers) interaction (2df)	56,505 European ancestry current drinkers, 9,870 African American current drinkers, 2,491 Asian ancestry current drinkers, 2,528 Hispanic current drinkers, 33,388 European ancestry non-drinkers, 11,119 African American non-drinkers, 9,959 Asian ancestry non-drinkers, 1,466 Hispanic non-drinkers	107,548 European ancestry current drinkers, 2,028 African American or Afro-Caribbean current drinkers, 41,240 Asian ancestry current drinkers, 6,622 Hispanic individuals, 1,984 Brazilian ancestry individuals, 29,438 European ancestry non-drinkers, 2,447 African American or Afro-Caribbean non-drinkers, 67,191 Asian ancestry non-drinkers, 7,092 Hispanic non-drinkers, 1,668 Brazilian ancestry non-dr…	11p11.2	MYBPC3	(EA)
chr11	47362464	47362465	rs10769254	de Vries PS	2019-01-29	Multi-Ancestry Genome-Wide Association Study of Lipid Levels Incorporating Gene-Alcohol Interactions.	Triglyceride levels in current drinkers	56,505 European ancestry individuals, 9,870 African American individuals, 2,491 Asian ancestry individuals, 2,528 Hispanic individuals	107,548 European ancestry individuals, 2,028 African American or Afro-Caribbean individuals, 41,240 Asian ancestry individuals, 6,622 Hispanic individuals, 1,984 Brazilian ancestry individuals	11p11.2	MYBPC3
chr11	47362464	47362465	rs10769254	de Vries PS	2019-01-29	Multi-Ancestry Genome-Wide Association Study of Lipid Levels Incorporating Gene-Alcohol Interactions.	HDL cholesterol levels x alcohol consumption (regular vs non-regular drinkers) interaction (2df)	44,831 European ancestry regular drinkers, 3,976 African American regular drinkers, 1,288 Asian ancestry regular drinkers, 827 Hispanic regular drinkers, 11,674 European ancestry non-regular drinkers, 5,894 African American non-regular drinkers, 1,203 Asian ancestry non-regular drinkers, 1,701 Hispanic non-regular drinkers	71,281 European ancestry regular drinkers, 711 African American or Afro-Caribbean regular drinkers, 35,088 Asian ancestry regular drinkers, 3,742 Hispanic regular drinkers, 36,267 European ancestry non-regular drinkers, 1,317 African American or Afro-Caribbean non-regular drinkers, 6,152 Asian ancestry non-regular drinkers, 2,880 Hispanic non-regular drinkers	11p11.2	MYBPC3	(EA)
chr11	47362464	47362465	rs10769254	de Vries PS	2019-01-29	Multi-Ancestry Genome-Wide Association Study of Lipid Levels Incorporating Gene-Alcohol Interactions.	HDL cholesterol levels x alcohol consumption (regular vs non-regular drinkers) interaction (2df)	44,831 European ancestry regular drinkers, 3,976 African American regular drinkers, 1,288 Asian ancestry regular drinkers, 827 Hispanic regular drinkers, 11,674 European ancestry non-regular drinkers, 5,894 African American non-regular drinkers, 1,203 Asian ancestry non-regular drinkers, 1,701 Hispanic non-regular drinkers	71,281 European ancestry regular drinkers, 711 African American or Afro-Caribbean regular drinkers, 35,088 Asian ancestry regular drinkers, 3,742 Hispanic regular drinkers, 36,267 European ancestry non-regular drinkers, 1,317 African American or Afro-Caribbean non-regular drinkers, 6,152 Asian ancestry non-regular drinkers, 2,880 Hispanic non-regular drinkers	11p11.2	MYBPC3
chr11	47362464	47362465	rs10769254	de Vries PS	2019-01-29	Multi-Ancestry Genome-Wide Association Study of Lipid Levels Incorporating Gene-Alcohol Interactions.	HDL cholesterol levels x alcohol consumption (regular vs non-regular drinkers) interaction (2df)	44,831 European ancestry regular drinkers, 3,976 African American regular drinkers, 1,288 Asian ancestry regular drinkers, 827 Hispanic regular drinkers, 11,674 European ancestry non-regular drinkers, 5,894 African American non-regular drinkers, 1,203 Asian ancestry non-regular drinkers, 1,701 Hispanic non-regular drinkers	71,281 European ancestry regular drinkers, 711 African American or Afro-Caribbean regular drinkers, 35,088 Asian ancestry regular drinkers, 3,742 Hispanic regular drinkers, 36,267 European ancestry non-regular drinkers, 1,317 African American or Afro-Caribbean non-regular drinkers, 6,152 Asian ancestry non-regular drinkers, 2,880 Hispanic non-regular drinkers	11p11.2	MYBPC3	(Asian)
chr11	47362464	47362465	rs10769254	de Vries PS	2019-01-29	Multi-Ancestry Genome-Wide Association Study of Lipid Levels Incorporating Gene-Alcohol Interactions.	HDL cholesterol levels x alcohol consumption (drinkers vs non-drinkers) interaction (2df)	56,505 European ancestry current drinkers, 9,870 African American current drinkers, 2,491 Asian ancestry current drinkers, 2,528 Hispanic current drinkers, 33,388 European ancestry non-drinkers, 11,119 African American non-drinkers, 9,959 Asian ancestry non-drinkers, 1,466 Hispanic non-drinkers	107,548 European ancestry current drinkers, 2,028 African American or Afro-Caribbean current drinkers, 41,240 Asian ancestry current drinkers, 6,622 Hispanic individuals, 1,984 Brazilian ancestry individuals, 29,438 European ancestry non-drinkers, 2,447 African American or Afro-Caribbean non-drinkers, 67,191 Asian ancestry non-drinkers, 7,092 Hispanic non-drinkers, 1,668 Brazilian ancestry non-dr…	11p11.2	MYBPC3	(EA)
chr11	47362464	47362465	rs10769254	de Vries PS	2019-01-29	Multi-Ancestry Genome-Wide Association Study of Lipid Levels Incorporating Gene-Alcohol Interactions.	HDL cholesterol levels x alcohol consumption (drinkers vs non-drinkers) interaction (2df)	56,505 European ancestry current drinkers, 9,870 African American current drinkers, 2,491 Asian ancestry current drinkers, 2,528 Hispanic current drinkers, 33,388 European ancestry non-drinkers, 11,119 African American non-drinkers, 9,959 Asian ancestry non-drinkers, 1,466 Hispanic non-drinkers	107,548 European ancestry current drinkers, 2,028 African American or Afro-Caribbean current drinkers, 41,240 Asian ancestry current drinkers, 6,622 Hispanic individuals, 1,984 Brazilian ancestry individuals, 29,438 European ancestry non-drinkers, 2,447 African American or Afro-Caribbean non-drinkers, 67,191 Asian ancestry non-drinkers, 7,092 Hispanic non-drinkers, 1,668 Brazilian ancestry non-dr…	11p11.2	MYBPC3
chr11	47362464	47362465	rs10769254	de Vries PS	2019-01-29	Multi-Ancestry Genome-Wide Association Study of Lipid Levels Incorporating Gene-Alcohol Interactions.	HDL cholesterol levels x alcohol consumption (drinkers vs non-drinkers) interaction (2df)	56,505 European ancestry current drinkers, 9,870 African American current drinkers, 2,491 Asian ancestry current drinkers, 2,528 Hispanic current drinkers, 33,388 European ancestry non-drinkers, 11,119 African American non-drinkers, 9,959 Asian ancestry non-drinkers, 1,466 Hispanic non-drinkers	107,548 European ancestry current drinkers, 2,028 African American or Afro-Caribbean current drinkers, 41,240 Asian ancestry current drinkers, 6,622 Hispanic individuals, 1,984 Brazilian ancestry individuals, 29,438 European ancestry non-drinkers, 2,447 African American or Afro-Caribbean non-drinkers, 67,191 Asian ancestry non-drinkers, 7,092 Hispanic non-drinkers, 1,668 Brazilian ancestry non-dr…	11p11.2	MYBPC3	(Asian)
[truncated: 7,967 more rows]

## Sheet: BP
#gwasCatalog.chrom	gwasCatalog.chromStart	gwasCatalog.chromEnd	gwasCatalog.name	gwasCatalog.pubMedID	gwasCatalog.author	gwasCatalog.pubDate	gwasCatalog.journal	gwasCatalog.title	gwasCatalog.trait	gwasCatalog.initSample	gwasCatalog.replSample	gwasCatalog.region	gwasCatalog.genes	gwasCatalog.riskAllele	gwasCatalog.riskAlFreq	gwasCatalog.pValue	gwasCatalog.pValueDesc	gwasCatalog.orOrBeta	gwasCatalog.ci95	gwasCatalog.platform	gwasCatalog.cnv
[truncated: 2,976 more rows]
