# Supplementary material for: Identifying sex-specific genetic effects across 733 traits in UK Biobank
Source: Research Square preprint supplement (doi:10.21203/rs.3.rs-701876/v1), 2021-07-20
Supplement: Supplementary file 9 [file 4. QTL Pathway Analysis.xlsx]

## Sheet: 4. QTL Pathway Analysis
source	term_name	term_id	term_size	effective_domain_size	Fat All	Fat Male Union	Fat Female Union	Fat Male Only	Fat Female Only
GO:MF	protein binding	GO:0005515	14767	18679	7.73676e-15	7.73676e-15	7.73676e-15	1	1
GO:MF	peptide antigen binding	GO:0042605	30	18679	1.17173e-06	1.17173e-06	1.17173e-06	1.0269e-11	1
GO:MF	MHC class II receptor activity	GO:0032395	8	18679	0.00122184	0.00122184	0.00122184	5.67643e-09	1
GO:MF	binding	GO:0005488	17070	18679	3.36353e-06	3.36353e-06	3.36353e-06	1	1
GO:MF	peptide binding	GO:0042277	312	18679	1	1	1	1.22343e-05	1
GO:MF	antigen binding	GO:0003823	163	18679	1	1	1	1.35129e-05	1
GO:MF	enzyme binding	GO:0019899	2048	18679	4.59698e-05	4.59698e-05	4.59698e-05	1	1
GO:MF	amide binding	GO:0033218	387	18679	1	1	1	9.19044e-05	1
GO:MF	TAP binding	GO:0046977	9	18679	0.000107078	0.000107078	0.000107078	0.168015	1
GO:MF	protein tyrosine kinase activity	GO:0004713	144	18679	0.0210866	0.0210866	0.0210866	1	1
GO:MF	immune receptor activity	GO:0140375	133	18679	1	1	1	0.0246506	1
GO:BP	interferon-gamma-mediated signaling pathway	GO:0060333	88	18123	1.16118e-06	1.16118e-06	1.16118e-06	1.3102e-08	1
GO:BP	antigen processing and presentation of exogenous peptide antigen	GO:0002478	175	18123	0.000602198	0.000602198	0.000602198	2.83706e-07	1
GO:BP	cellular response to interferon-gamma	GO:0071346	177	18123	0.000787031	0.000787031	0.000787031	3.17299e-07	1
GO:BP	antigen processing and presentation of exogenous antigen	GO:0019884	183	18123	0.000550858	0.000550858	0.000550858	4.40366e-07	1
GO:BP	antigen processing and presentation of endogenous peptide antigen	GO:0002483	19	18123	7.16171e-07	7.16171e-07	7.16171e-07	5.1635e-06	1
GO:BP	antigen processing and presentation of peptide antigen	GO:0048002	193	18123	0.00194751	0.00194751	0.00194751	7.41808e-07	1
GO:BP	response to interferon-gamma	GO:0034341	198	18123	0.00351656	0.00351656	0.00351656	9.52481e-07	1
GO:BP	antigen processing and presentation	GO:0019882	236	18123	0.000175785	0.000175785	0.000175785	5.22976e-06	1
GO:BP	cellular component organization or biogenesis	GO:0071840	6880	18123	1.1004e-05	1.1004e-05	1.1004e-05	1	1
GO:BP	cellular component organization	GO:0016043	6661	18123	2.72779e-05	2.72779e-05	2.72779e-05	1	1
GO:BP	antigen processing and presentation of endogenous antigen	GO:0019883	26	18123	8.76917e-05	8.76917e-05	8.76917e-05	2.87247e-05	1
GO:BP	antigen processing and presentation of exogenous peptide antigen via MHC class II	GO:0019886	97	18123	0.200739	0.200739	0.200739	3.83354e-05	1
GO:BP	cytokine-mediated signaling pathway	GO:0019221	824	18123	1	1	1	4.25977e-05	1
GO:BP	antigen processing and presentation of peptide antigen via MHC class II	GO:0002495	101	18123	0.344431	0.344431	0.344431	5.08321e-05	1
GO:BP	antigen processing and presentation of peptide or polysaccharide antigen via MHC class II	GO:0002504	104	18123	0.504986	0.504986	0.504986	6.23289e-05	1
GO:BP	positive regulation of cellular process	GO:0048522	5863	18123	8.78419e-05	8.78419e-05	8.78419e-05	1	1
GO:BP	antigen processing and presentation of exogenous peptide antigen via MHC class I, TAP-independent	GO:0002480	8	18123	0.000119002	0.000119002	0.000119002	0.00291709	1
GO:BP	positive regulation of biological process	GO:0048518	6474	18123	0.000138691	0.000138691	0.000138691	0.122111	1
GO:BP	positive regulation of RNA metabolic process	GO:0051254	1775	18123	0.000183125	0.000183125	0.000183125	1	1
GO:BP	response to cytokine	GO:0034097	1242	18123	1	1	1	0.000262748	1
GO:BP	positive regulation of macromolecule metabolic process	GO:0010604	3568	18123	0.0002814	0.0002814	0.0002814	1	1
GO:BP	cellular response to cytokine stimulus	GO:0071345	1148	18123	1	1	1	0.000529041	1
GO:BP	metabolic process	GO:0008152	11915	18123	0.000768092	0.000768092	0.000768092	1	1
GO:BP	organic substance metabolic process	GO:0071704	11397	18123	0.000873668	0.000873668	0.000873668	1	1
GO:BP	T cell mediated cytotoxicity	GO:0001913	42	18123	0.00087511	0.00087511	0.00087511	0.0160759	1
GO:BP	positive regulation of nucleobase-containing compound metabolic process	GO:0045935	1943	18123	0.000920219	0.000920219	0.000920219	1	1
GO:BP	positive regulation of transcription, DNA-templated	GO:0045893	1623	18123	0.00108269	0.00108269	0.00108269	1	1
GO:BP	positive regulation of nucleic acid-templated transcription	GO:1903508	1623	18123	0.00108269	0.00108269	0.00108269	1	1
GO:BP	positive regulation of RNA biosynthetic process	GO:1902680	1624	18123	0.00112508	0.00112508	0.00112508	1	1
GO:BP	organelle organization	GO:0006996	4136	18123	0.00125371	0.00125371	0.00125371	1	1
GO:BP	cellular metabolic process	GO:0044237	10941	18123	0.00171733	0.00171733	0.00171733	1	1
GO:BP	regulation of cell killing	GO:0031341	109	18123	0.00221457	0.00221457	0.00221457	0.002081	1
GO:BP	positive regulation of nitrogen compound metabolic process	GO:0051173	3143	18123	0.00260166	0.00260166	0.00260166	1	1
GO:BP	positive regulation of leukocyte mediated cytotoxicity	GO:0001912	52	18123	0.0027701	0.0027701	0.0027701	0.0379844	1
GO:BP	adaptive immune response	GO:0002250	715	18123	1	1	1	0.00320241	1
GO:BP	innate immune response	GO:0045087	1003	18123	1	1	1	0.00339622	1
GO:BP	regulation of T cell mediated cytotoxicity	GO:0001914	35	18123	0.00426672	0.00426672	0.00426672	0.00764429	1
GO:BP	leukocyte mediated cytotoxicity	GO:0001909	113	18123	0.00429231	0.00429231	0.00429231	0.0497824	1
GO:BP	T cell receptor signaling pathway	GO:0050852	202	18123	0.609979	0.609979	0.609979	0.00567298	1
GO:BP	positive regulation of metabolic process	GO:0009893	3873	18123	0.00587673	0.00587673	0.00587673	1	1
GO:BP	positive regulation of cell killing	GO:0031343	69	18123	0.00618321	0.00618321	0.00618321	0.116573	1
GO:BP	cellular component biogenesis	GO:0044085	3377	18123	0.00634672	0.00634672	0.00634672	1	1
GO:BP	regulation of leukocyte mediated cytotoxicity	GO:0001910	75	18123	0.0208533	0.0208533	0.0208533	0.00670318	1
GO:BP	macromolecule metabolic process	GO:0043170	9867	18123	0.00690256	0.00690256	0.00690256	1	1
GO:BP	primary metabolic process	GO:0044238	10642	18123	0.00822929	0.00822929	0.00822929	1	1
GO:BP	nitrogen compound metabolic process	GO:0006807	10148	18123	0.00861257	0.00861257	0.00861257	1	1
GO:BP	regulation of cellular component organization	GO:0051128	2439	18123	0.00941662	0.00941662	0.00941662	1	1
GO:BP	positive regulation of T cell mediated cytotoxicity	GO:0001916	26	18123	0.0094644	0.0094644	0.0094644	0.130097	1
GO:BP	positive regulation of leukocyte mediated immunity	GO:0002705	127	18123	0.0102183	0.0102183	0.0102183	0.0872024	1
GO:BP	positive regulation of macromolecule biosynthetic process	GO:0010557	1859	18123	0.014033	0.014033	0.014033	1	1
GO:BP	positive regulation of cellular metabolic process	GO:0031325	3342	18123	0.0141698	0.0141698	0.0141698	1	1
GO:BP	cellular localization	GO:0051641	3519	18123	0.0148434	0.0148434	0.0148434	1	1
GO:BP	myeloid dendritic cell antigen processing and presentation	GO:0002469	2	18123	1	1	1	0.0173556	1
GO:BP	antigen processing and presentation of endogenous peptide antigen via MHC class II	GO:0002491	2	18123	1	1	1	0.0173556	1
GO:BP	antigen processing and presentation of endogenous peptide antigen via MHC class I	GO:0019885	13	18123	0.0188291	0.0188291	0.0188291	1	1
GO:BP	antigen processing and presentation of peptide antigen via MHC class Ib	GO:0002428	6	18123	0.0194998	0.0194998	0.0194998	0.258233	1
GO:BP	cell killing	GO:0001906	196	18123	0.0218944	0.0218944	0.0218944	0.0607123	1
GO:BP	regulation of adaptive immune response	GO:0002819	172	18123	0.243684	0.243684	0.243684	0.0290627	1
GO:BP	regulation of biological process	GO:0050789	12122	18123	1	1	1	0.0294088	1
GO:BP	cellular component assembly	GO:0022607	3104	18123	0.0298213	0.0298213	0.0298213	1	1
GO:BP	T cell mediated immunity	GO:0002456	102	18123	0.392087	0.392087	0.392087	0.0303272	1
GO:BP	positive regulation of cellular biosynthetic process	GO:0031328	1976	18123	0.0327667	0.0327667	0.0327667	1	1
GO:BP	defense response to other organism	GO:0098542	1222	18123	1	1	1	0.0329828	1
GO:BP	positive regulation of response to stimulus	GO:0048584	2368	18123	1	1	1	0.0332414	1
GO:BP	positive regulation of immune response	GO:0050778	757	18123	1	1	1	0.0356817	1
GO:BP	positive regulation of regulatory T cell differentiation	GO:0045591	18	18123	1	1	1	0.0415665	1
GO:BP	positive regulation of biosynthetic process	GO:0009891	2013	18123	0.0456031	0.0456031	0.0456031	1	1
GO:BP	GDP catabolic process	GO:0046712	2	18123	1	1	1	1	0.0495873
GO:CC	MHC protein complex	GO:0042611	24	18964	2.95708e-11	2.95708e-11	2.95708e-11	1.34096e-17	1
GO:CC	intracellular anatomical structure	GO:0005622	14808	18964	3.52891e-16	3.52891e-16	3.52891e-16	1	1
GO:CC	lumenal side of endoplasmic reticulum membrane	GO:0098553	25	18964	3.28672e-08	3.28672e-08	3.28672e-08	5.489e-15	1
GO:CC	integral component of lumenal side of endoplasmic reticulum membrane	GO:0071556	25	18964	3.28672e-08	3.28672e-08	3.28672e-08	5.489e-15	1
GO:CC	lumenal side of membrane	GO:0098576	33	18964	3.60408e-06	3.60408e-06	3.60408e-06	1.01746e-13	1
GO:CC	intracellular organelle	GO:0043229	13117	18964	4.48614e-12	4.48614e-12	4.48614e-12	1	0.455444
GO:CC	MHC class II protein complex	GO:0042613	16	18964	8.02081e-05	8.02081e-05	8.02081e-05	4.57966e-12	1
GO:CC	organelle	GO:0043226	14027	18964	1.25513e-11	1.25513e-11	1.25513e-11	1	1
GO:CC	ER to Golgi transport vesicle membrane	GO:0012507	57	18964	4.681e-05	4.681e-05	4.681e-05	2.24682e-11	1
GO:CC	COPII-coated ER to Golgi transport vesicle	GO:0030134	90	18964	0.00283001	0.00283001	0.00283001	3.36938e-11	1
GO:CC	cytosol	GO:0005829	5361	18964	7.75238e-10	7.75238e-10	7.75238e-10	1	1
GO:CC	membrane-bounded organelle	GO:0043227	13201	18964	1.7577e-09	1.7577e-09	1.7577e-09	1	1
GO:CC	nuclear lumen	GO:0031981	4453	18964	2.56484e-09	2.56484e-09	2.56484e-09	1	1
GO:CC	nucleoplasm	GO:0005654	4112	18964	2.96634e-09	2.96634e-09	2.96634e-09	1	1
GO:CC	intracellular membrane-bounded organelle	GO:0043231	12046	18964	5.1214e-09	5.1214e-09	5.1214e-09	1	0.504844
GO:CC	membrane-enclosed lumen	GO:0031974	5579	18964	1.49021e-07	1.49021e-07	1.49021e-07	1	1
GO:CC	intracellular organelle lumen	GO:0070013	5579	18964	1.49021e-07	1.49021e-07	1.49021e-07	1	1
GO:CC	organelle lumen	GO:0043233	5579	18964	1.49021e-07	1.49021e-07	1.49021e-07	1	1
GO:CC	integral component of endoplasmic reticulum membrane	GO:0030176	161	18964	0.00135929	0.00135929	0.00135929	3.14047e-07	1
GO:CC	intrinsic component of endoplasmic reticulum membrane	GO:0031227	169	18964	0.00121084	0.00121084	0.00121084	4.82333e-07	1
GO:CC	coated vesicle membrane	GO:0030662	177	18964	0.00035793	0.00035793	0.00035793	7.25255e-07	1
GO:CC	endocytic vesicle membrane	GO:0030666	190	18964	0.0312329	0.0312329	0.0312329	1.3515e-06	1
GO:CC	transport vesicle membrane	GO:0030658	210	18964	0.0752248	0.0752248	0.0752248	3.23716e-06	1
GO:CC	coated vesicle	GO:0030135	296	18964	0.00380348	0.00380348	0.00380348	4.50348e-06	1
GO:CC	cytoplasm	GO:0005737	11951	18964	1.07341e-05	1.07341e-05	1.07341e-05	1	1
GO:CC	nucleus	GO:0005634	7607	18964	1.72035e-05	1.72035e-05	1.72035e-05	1	1
GO:CC	MHC class I protein complex	GO:0042612	8	18964	1.79397e-05	1.79397e-05	1.79397e-05	0.000385521	1
GO:CC	clathrin-coated endocytic vesicle membrane	GO:0030669	72	18964	0.367726	0.367726	0.367726	2.03838e-05	1
GO:CC	lytic vacuole membrane	GO:0098852	395	18964	0.164552	0.164552	0.164552	6.69131e-05	1
GO:CC	lysosomal membrane	GO:0005765	395	18964	0.164552	0.164552	0.164552	6.69131e-05	1
GO:CC	side of membrane	GO:0098552	622	18964	0.871456	0.871456	0.871456	6.90744e-05	1
GO:CC	clathrin-coated endocytic vesicle	GO:0045334	89	18964	0.945398	0.945398	0.945398	7.28975e-05	1
GO:CC	trans-Golgi network membrane	GO:0032588	98	18964	0.0343117	0.0343117	0.0343117	0.000129332	1
GO:CC	endocytic vesicle	GO:0030139	335	18964	0.476228	0.476228	0.476228	0.000173527	1
GO:CC	vacuolar membrane	GO:0005774	450	18964	0.147137	0.147137	0.147137	0.000220432	1
GO:CC	plasma membrane protein complex	GO:0098797	696	18964	1	1	1	0.00022803	1
GO:CC	clathrin-coated vesicle membrane	GO:0030665	114	18964	0.0281231	0.0281231	0.0281231	0.000315799	1
GO:CC	integral component of organelle membrane	GO:0031301	389	18964	0.714268	0.714268	0.714268	0.000597237	1
GO:CC	endosome membrane	GO:0010008	520	18964	1	1	1	0.000808337	1
GO:CC	transport vesicle	GO:0030133	416	18964	0.0108636	0.0108636	0.0108636	0.00103298	1
GO:CC	intrinsic component of organelle membrane	GO:0031300	419	18964	0.175695	0.175695	0.175695	0.00109509	1
GO:CC	membrane protein complex	GO:0098796	1326	18964	1	1	1	0.00156958	1
GO:CC	endosome	GO:0005768	993	18964	0.015185	0.015185	0.015185	0.00158464	1
GO:CC	lysosome	GO:0005764	723	18964	0.151848	0.151848	0.151848	0.00230474	1
GO:CC	lytic vacuole	GO:0000323	723	18964	0.151848	0.151848	0.151848	0.00230474	1
GO:CC	clathrin-coated vesicle	GO:0030136	194	18964	0.248254	0.248254	0.248254	0.00674249	1
GO:CC	vacuole	GO:0005773	818	18964	0.0531948	0.0531948	0.0531948	0.00728103	1
GO:CC	non-membrane-bounded organelle	GO:0043228	5102	18964	0.00913147	0.00913147	0.00913147	1	1
GO:CC	intracellular non-membrane-bounded organelle	GO:0043232	5094	18964	0.010247	0.010247	0.010247	1	1
GO:CC	Golgi membrane	GO:0000139	725	18964	1	1	1	0.0143683	1
GO:CC	protein-containing complex	GO:0032991	5541	18964	0.772885	0.772885	0.772885	0.0162856	1
GO:CC	vesicle	GO:0031982	4058	18964	0.0196369	0.0196369	0.0196369	0.625885	1
GO:CC	cytoplasmic vesicle membrane	GO:0030659	789	18964	0.290187	0.290187	0.290187	0.0290421	1
GO:CC	endoplasmic reticulum membrane	GO:0005789	1132	18964	1	1	1	0.0302344	1
GO:CC	trans-Golgi network	GO:0005802	255	18964	1	1	1	0.0307846	1
GO:CC	endoplasmic reticulum subcompartment	GO:0098827	1137	18964	1	1	1	0.0315237	1
GO:CC	extracellular exosome	GO:0070062	2178	18964	0.0333714	0.0333714	0.0333714	1	1
GO:CC	nuclear outer membrane-endoplasmic reticulum membrane network	GO:0042175	1154	18964	1	1	1	0.036269	1
GO:CC	early endosome	GO:0005769	387	18964	0.362279	0.362279	0.362279	0.041441	1
KEGG	Allograft rejection	KEGG:05330	34	8000	2.77049e-06	2.77049e-06	2.77049e-06	5.57593e-12	1
KEGG	Graft-versus-host disease	KEGG:05332	37	8000	9.97161e-06	9.97161e-06	9.97161e-06	1.17817e-11	1
KEGG	Type I diabetes mellitus	KEGG:04940	40	8000	4.6254e-08	4.6254e-08	4.6254e-08	2.33195e-11	1
KEGG	Autoimmune thyroid disease	KEGG:05320	49	8000	0.000500165	0.000500165	0.000500165	1.34161e-10	1
KEGG	Viral myocarditis	KEGG:05416	56	8000	1.76213e-05	1.76213e-05	1.76213e-05	4.16347e-10	1
KEGG	Antigen processing and presentation	KEGG:04612	69	8000	5.67279e-07	5.67279e-07	5.67279e-07	2.38396e-09	1
KEGG	Phagosome	KEGG:04145	147	8000	0.00988492	0.00988492	0.00988492	4.00427e-08	1
KEGG	Human T-cell leukemia virus 1 infection	KEGG:05166	216	8000	3.61779e-05	3.61779e-05	3.61779e-05	5.72711e-08	1
KEGG	Epstein-Barr virus infection	KEGG:05169	198	8000	0.00573897	0.00573897	0.00573897	5.61526e-07	1
KEGG	Cell adhesion molecules	KEGG:04514	146	8000	0.00884175	0.00884175	0.00884175	1.01911e-06	1
KEGG	Asthma	KEGG:05310	27	8000	0.251664	0.251664	0.251664	1.37694e-06	1
KEGG	Intestinal immune network for IgA production	KEGG:04672	45	8000	1	1	1	1.99939e-05	1
KEGG	Inflammatory bowel disease	KEGG:05321	62	8000	0.427521	0.427521	0.427521	0.000101836	1
KEGG	Herpes simplex virus 1 infection	KEGG:05168	494	8000	1	1	1	0.000144817	1
KEGG	Leishmaniasis	KEGG:05140	72	8000	1	1	1	0.000215179	0.819147
KEGG	Human papillomavirus infection	KEGG:05165	331	8000	0.669728	0.669728	0.669728	0.000532628	1
KEGG	Staphylococcus aureus infection	KEGG:05150	87	8000	0.334806	0.334806	0.334806	0.00054897	1
KEGG	Rheumatoid arthritis	KEGG:05323	88	8000	0.975747	0.975747	0.975747	0.000580701	1
KEGG	Th1 and Th2 cell differentiation	KEGG:04658	89	8000	1	1	1	0.000613851	1
KEGG	Cellular senescence	KEGG:04218	156	8000	0.0641128	0.0641128	0.0641128	0.00063836	1
KEGG	Hematopoietic cell lineage	KEGG:04640	95	8000	1	1	1	0.000845113	1
KEGG	Th17 cell differentiation	KEGG:04659	104	8000	1	1	1	0.00131382	1
KEGG	Toxoplasmosis	KEGG:05145	109	8000	0.452039	0.452039	0.452039	0.00164994	1
KEGG	Systemic lupus erythematosus	KEGG:05322	132	8000	1	1	1	0.0041428	1
KEGG	Influenza A	KEGG:05164	169	8000	1	1	1	0.0133081	1
KEGG	Tuberculosis	KEGG:05152	175	8000	1	1	1	0.0156585	1
KEGG	Viral carcinogenesis	KEGG:05203	202	8000	0.105903	0.105903	0.105903	0.0303798	1
REAC	Interferon gamma signaling	REAC:R-HSA-877300	87	10622	4.37248e-06	4.37248e-06	4.37248e-06	1.61665e-08	1
REAC	Translocation of ZAP-70 to Immunological synapse	REAC:R-HSA-202430	20	10622	0.189759	0.189759	0.189759	3.76677e-08	1
REAC	Phosphorylation of CD3 and TCR zeta chains	REAC:R-HSA-202427	23	10622	0.0755128	0.0755128	0.0755128	9.72253e-08	1
REAC	PD-1 signaling	REAC:R-HSA-389948	24	10622	0.653865	0.653865	0.653865	1.29246e-07	1
REAC	Generation of second messenger molecules	REAC:R-HSA-202433	35	10622	1	1	1	1.50816e-06	1
REAC	Interferon Signaling	REAC:R-HSA-913531	193	10622	0.00536525	0.00536525	0.00536525	1.96204e-05	1
REAC	Endosomal/Vacuolar pathway	REAC:R-HSA-1236977	11	10622	5.63415e-05	5.63415e-05	5.63415e-05	0.00330109	1
REAC	Costimulation by the CD28 family	REAC:R-HSA-388841	67	10622	1	1	1	8.42528e-05	1
REAC	Downstream TCR signaling	REAC:R-HSA-202424	98	10622	0.999911	0.999911	0.999911	0.000809857	1
REAC	Antigen Presentation: Folding, assembly and peptide loading of class I MHC	REAC:R-HSA-983170	25	10622	0.00259931	0.00259931	0.00259931	0.0442311	1
REAC	TCR signaling	REAC:R-HSA-202403	120	10622	1	1	1	0.00263099	1
REAC	MHC class II antigen presentation	REAC:R-HSA-2132295	123	10622	0.781004	0.781004	0.781004	0.00303335	1
REAC	Cytokine Signaling in Immune system	REAC:R-HSA-1280215	696	10622	1	1	1	0.00438543	1
REAC	Antigen processing-Cross presentation	REAC:R-HSA-1236975	99	10622	0.0457667	0.0457667	0.0457667	1	1
REAC	ER-Phagosome pathway	REAC:R-HSA-1236974	83	10622	0.0458528	0.0458528	0.0458528	1	1
REAC	Butyrophilin (BTN) family interactions	REAC:R-HSA-8851680	12	10622	0.0493642	0.0493642	0.0493642	1	1
