# Supplementary material for: Identifying sex-specific genetic effects across 733 traits in UK Biobank
Source: Research Square preprint supplement (doi:10.21203/rs.3.rs-701876/v1), 2021-07-20
Supplement: Supplementary file 10 [file 5. PRS Results.xlsx]

## Sheet: Supp Table
Trait	P+T All	P+T Male	P+T Female	PRScs All	PRScs Male	PRScs Female	P+T All SE	P+T Male SE	P+T Female SE	PRScs All SE	PRScs Male SE	PRScs Female SE	P+T Sex Diff	PRScs Sex Diff	P+T pval	PRScs pval
20022_irnt On Male	0.0174	0.0108	0.0085	0.0432	0.0227	0.0304	0.00540834	0.00542647	0.00543278	0.00533686	0.00539373	0.00537244	0.299532	-1.01145	0.764534	0.311802
20022_irnt On Female	0.0271	0.0074	0.0226	0.0565	0.0252	0.0459	0.00478257	0.00483074	0.00479361	0.00470975	0.00478723	0.00473613	-2.23349	-3.07389	0.0255168	0.00211285
23123_irnt On Male	0.0554	0.0389	0.0346	0.0991	0.0845	0.0688	0.00530273	0.00534884	0.0053608	0.00517862	0.00522041	0.00526498	0.567817	2.11751	0.570159	0.0342164
23123_irnt On Female	0.0657	0.0299	0.0515	0.113	0.0731	0.099	0.00468673	0.00477568	0.00472221	0.00456655	0.00466813	0.00460245	-3.21614	-3.95091	0.00129928	7.78557e-05
23128_irnt On Male	0.0629	0.0399	0.0364	0.1031	0.0884	0.0719	0.00528164	0.00534606	0.0053558	0.00516711	0.00520928	0.00525621	0.462513	2.22964	0.643714	0.0257713
23128_irnt On Female	0.0719	0.0332	0.0535	0.1219	0.0787	0.1048	0.00467115	0.00476755	0.00471723	0.00454359	0.00465401	0.00458761	-3.02676	-3.99389	0.00247192	6.49982e-05
23119_irnt On Male	0.0554	0.0396	0.0342	0.099	0.085	0.0709	0.00530273	0.0053469	0.00536191	0.00517891	0.00521899	0.00525904	0.713128	1.90305	0.475767	0.0570334
23119_irnt On Female	0.0642	0.0299	0.0511	0.1102	0.0736	0.0949	0.00469049	0.00477568	0.00472321	0.00457376	0.00466687	0.00461291	-3.15625	-3.24601	0.00159811	0.00117036
23111_irnt On Male	0.059	0.0398	0.0361	0.0923	0.0783	0.0669	0.00529262	0.00534634	0.00535663	0.00519813	0.00523806	0.00527035	0.488891	1.5342	0.624919	0.124982
23111_irnt On Female	0.0613	0.0292	0.046	0.0999	0.0669	0.0856	0.00469775	0.0047774	0.00473588	0.00460015	0.00468372	0.00463655	-2.49741	-2.83741	0.0125105	0.00454807
23100_irnt On Male	0.068	0.0441	0.0387	0.1084	0.0907	0.0774	0.00526725	0.00533435	0.0053494	0.00515182	0.0052027	0.00524062	0.7148	1.80105	0.474733	0.0716954
23100_irnt On Female	0.0699	0.0331	0.0508	0.1188	0.0817	0.0997	0.00467618	0.00476779	0.00472395	0.0045516	0.00464643	0.00460066	-2.63717	-2.75282	0.0083602	0.00590852
23115_irnt On Male	0.058	0.0411	0.0363	0.0907	0.0775	0.0673	0.00529543	0.00534272	0.00535607	0.0052027	0.00524033	0.00526922	0.634485	1.37255	0.525765	0.169891
23115_irnt On Female	0.0608	0.0284	0.0463	0.1003	0.0662	0.086	0.004699	0.00477937	0.00473514	0.00459913	0.00468548	0.00463554	-2.66058	-3.00408	0.00780052	0.00266389
23124_irnt On Male	0.0621	0.043	0.0368	0.11	0.093	0.0783	0.00528389	0.00533742	0.00535468	0.00514719	0.00519612	0.00523806	0.820055	1.99237	0.412185	0.0463302
23124_irnt On Female	0.0655	0.0325	0.0487	0.1156	0.0783	0.0971	0.00468723	0.00476927	0.00472918	0.00455986	0.00465502	0.0046073	-2.41198	-2.87043	0.0158662	0.00409912
23112_irnt On Male	0.0655	0.0447	0.038	0.1061	0.0899	0.0752	0.00527431	0.00533268	0.00535135	0.00515846	0.00520499	0.00524686	0.886858	1.989	0.375155	0.0467008
23112_irnt On Female	0.0639	0.0307	0.0464	0.1101	0.0753	0.094	0.00469124	0.00477371	0.00473489	0.00457401	0.00466259	0.0046152	-2.33504	-2.8504	0.0195413	0.00436639
23120_irnt On Male	0.065	0.0433	0.0377	0.1138	0.0952	0.0824	0.00527572	0.00533659	0.00535218	0.00513619	0.00518982	0.0052264	0.740926	1.73785	0.458738	0.0822371
23120_irnt On Female	0.066	0.0324	0.0492	0.1151	0.0777	0.0963	0.00468598	0.00476952	0.00472793	0.00456115	0.00465654	0.00460934	-2.50157	-2.83881	0.0123643	0.00452826
23116_irnt On Male	0.0675	0.0446	0.0384	0.1077	0.09	0.0762	0.00526866	0.00533296	0.00535023	0.00515384	0.00520471	0.00524402	0.820739	1.86779	0.411795	0.0617917
23116_irnt On Female	0.0652	0.0301	0.0472	0.1092	0.0765	0.0935	0.00468798	0.00477519	0.0047329	0.00457633	0.00465956	0.00461648	-2.54339	-2.59177	0.0109782	0.00954834
4079_irnt On Male	0.0294	0.0169	0.0163	0.0571	0.0417	0.0399	0.00626076	0.00630095	0.00630287	0.00617078	0.00622097	0.00622681	0.0673231	0.204501	0.946324	0.837962
4079_irnt On Female	0.0322	0.0118	0.0266	0.0659	0.0327	0.0618	0.00527993	0.00533528	0.00529518	0.00518719	0.00527856	0.00519856	-1.96889	-3.92784	0.0489658	8.57136e-05
4080_irnt On Male	0.0266	0.0141	0.0157	0.0554	0.0405	0.0387	0.00626979	0.00630992	0.00630479	0.00617634	0.00622486	0.0062307	-0.179373	0.204373	0.857645	0.838062
4080_irnt On Female	0.0264	0.0102	0.0194	0.0514	0.0284	0.044	0.00529573	0.0053396	0.00531473	0.00522729	0.00529028	0.00524764	-1.22117	-2.09354	0.222022	0.0363011
6150_4 On Male	0.0062	0.0034	0.0032	0.0121	0.009	0.0086	0.00633515	0.00634406	0.0063447	0.00631631	0.00632622	0.00632749	0.0222908	0.0447051	0.982216	0.964342
6150_4 On Female	0.0052	0.0021	0.0045	0.0119	0.0081	0.0097	0.00535307	0.00536141	0.00535495	0.00533501	0.00534526	0.00534095	-0.316722	-0.211744	0.751454	0.832307
1210 On Male	0.0077	0.0037	0.0038	0.0155	0.0089	0.0091	0.00543497	0.00544591	0.00544564	0.00541357	0.00543168	0.00543113	-0.0129845	-0.0260377	0.98964	0.979227
1210 On Female	0.0092	0.0025	0.0078	0.02	0.0081	0.0168	0.00482636	0.00484265	0.00482977	0.00479998	0.00482904	0.00480781	-0.774917	-1.27673	0.438389	0.201699
30510_irnt On Male	0.0088	0.0068	0.0031	0.0177	0.0109	0.0103	0.00543196	0.00543743	0.00544755	0.00540751	0.0054262	0.00542784	0.480716	0.0781762	0.630718	0.937688
30510_irnt On Female	0.0081	0.0022	0.0069	0.0175	0.0074	0.0138	0.00482904	0.00484338	0.00483196	0.0048061	0.00483074	0.00481514	-0.686984	-0.938323	0.492093	0.348079
